# Supplementary material for: Predicting and Interpreting the Structure of Type IV Pilus of Electricigens by Molecular Dynamics Simulations
Source: Molecules. 2017 Aug 12;22(8):1342. doi: 10.3390/molecules22081342 (PMC6152092; doi:10.3390/molecules22081342)
Supplement: Supplementary file 1 [file molecules-22-01342-s001.zip]

Archive with 7 entries (7 files):
- Neisseria meningitidis 2 (NM2).pdb
- Neisseria meningitidis 3 (NM3).pdb
- Neisseria meningitidis 4 (NM4).pdb
- molecules-210605-supplementary.pdf
- Neisseria gonorrhoeae 2 (GC2).pdb
- Neisseria gonorrhoeae 3 (GC3).pdb
- Neisseria gonorrhoeae 4 (GC4).pdb
