# Supplementary material for: Predicting and Interpreting the Structure of Type IV Pilus of Electricigens by Molecular Dynamics Simulations
Source: Molecules. 2017 Aug 12;22(8):1342. doi: 10.3390/molecules22081342 (PMC6152092; doi:10.3390/molecules22081342)
Supplement: Supplementary file 1 [file molecules-22-01342-s001.zip › Neisseria gonorrhoeae 2 (GC2).pdb]

ATOM      1  N   PHE A   1       5.321  -8.088  -8.979  1.00  0.00           N  
ATOM      2  CA  PHE A   1       4.994  -6.894  -8.141  1.00  0.00           C  
ATOM      3  C   PHE A   1       3.799  -6.064  -8.612  1.00  0.00           C  
ATOM      4  O   PHE A   1       2.647  -6.505  -8.710  1.00  0.00           O  
ATOM      5  CB  PHE A   1       6.210  -5.970  -8.063  1.00  0.00           C  
ATOM      6  CG  PHE A   1       7.326  -6.508  -7.212  1.00  0.00           C  
ATOM      7  CD1 PHE A   1       8.479  -7.012  -7.795  1.00  0.00           C  
ATOM      8  CD2 PHE A   1       7.224  -6.511  -5.830  1.00  0.00           C  
ATOM      9  CE1 PHE A   1       9.506  -7.507  -7.013  1.00  0.00           C  
ATOM     10  CE2 PHE A   1       8.249  -7.005  -5.046  1.00  0.00           C  
ATOM     11  CZ  PHE A   1       9.392  -7.504  -5.639  1.00  0.00           C  
ATOM     12  N   THR A   2       4.042  -4.824  -9.105  1.00  0.00           N  
ATOM     13  CA  THR A   2       2.963  -3.921  -9.572  1.00  0.00           C  
ATOM     14  C   THR A   2       2.932  -3.724 -11.099  1.00  0.00           C  
ATOM     15  O   THR A   2       2.167  -4.413 -11.748  1.00  0.00           O  
ATOM     16  CB  THR A   2       3.086  -2.543  -8.895  1.00  0.00           C  
ATOM     17  CG2 THR A   2       2.936  -2.673  -7.387  1.00  0.00           C  
ATOM     18  OG1 THR A   2       4.366  -1.972  -9.197  1.00  0.00           O  
ATOM     19  N   LEU A   3       3.782  -2.809 -11.632  1.00  0.00           N  
ATOM     20  CA  LEU A   3       3.866  -2.662 -13.116  1.00  0.00           C  
ATOM     21  C   LEU A   3       4.388  -3.876 -13.823  1.00  0.00           C  
ATOM     22  O   LEU A   3       5.578  -4.166 -13.664  1.00  0.00           O  
ATOM     23  CB  LEU A   3       4.766  -1.476 -13.485  1.00  0.00           C  
ATOM     24  CG  LEU A   3       4.920  -1.198 -14.986  1.00  0.00           C  
ATOM     25  CD1 LEU A   3       3.577  -0.773 -15.564  1.00  0.00           C  
ATOM     26  CD2 LEU A   3       5.973  -0.121 -15.198  1.00  0.00           C  
ATOM     27  N   ILE A   4       3.506  -4.400 -14.667  1.00  0.00           N  
ATOM     28  CA  ILE A   4       3.635  -5.560 -15.506  1.00  0.00           C  
ATOM     29  C   ILE A   4       3.094  -5.356 -16.915  1.00  0.00           C  
ATOM     30  O   ILE A   4       3.836  -5.860 -17.806  1.00  0.00           O  
ATOM     31  CB  ILE A   4       2.920  -6.759 -14.857  1.00  0.00           C  
ATOM     32  CG1 ILE A   4       1.427  -6.464 -14.692  1.00  0.00           C  
ATOM     33  CG2 ILE A   4       3.552  -7.091 -13.514  1.00  0.00           C  
ATOM     34  CD1 ILE A   4       0.612  -7.663 -14.262  1.00  0.00           C  
ATOM     35  N   GLU A   5       2.156  -4.549 -17.201  1.00  0.00           N  
ATOM     36  CA  GLU A   5       1.661  -4.266 -18.557  1.00  0.00           C  
ATOM     37  C   GLU A   5       2.737  -3.673 -19.476  1.00  0.00           C  
ATOM     38  O   GLU A   5       2.635  -4.022 -20.684  1.00  0.00           O  
ATOM     39  CB  GLU A   5       0.469  -3.310 -18.487  1.00  0.00           C  
ATOM     40  CG  GLU A   5       0.732  -2.033 -17.700  1.00  0.00           C  
ATOM     41  CD  GLU A   5       0.483  -2.193 -16.226  1.00  0.00           C  
ATOM     42  OE1 GLU A   5       0.883  -3.193 -15.680  1.00  0.00           O  
ATOM     43  OE2 GLU A   5      -0.109  -1.314 -15.645  1.00  0.00           O1-
ATOM     44  N   LEU A   6       3.745  -3.049 -18.945  1.00  0.00           N  
ATOM     45  CA  LEU A   6       4.935  -2.619 -19.668  1.00  0.00           C  
ATOM     46  C   LEU A   6       5.702  -3.735 -20.398  1.00  0.00           C  
ATOM     47  O   LEU A   6       5.983  -3.597 -21.620  1.00  0.00           O  
ATOM     48  CB  LEU A   6       5.885  -1.923 -18.685  1.00  0.00           C  
ATOM     49  CG  LEU A   6       7.243  -1.500 -19.259  1.00  0.00           C  
ATOM     50  CD1 LEU A   6       7.032  -0.458 -20.349  1.00  0.00           C  
ATOM     51  CD2 LEU A   6       8.119  -0.953 -18.141  1.00  0.00           C  
ATOM     52  N   MET A   7       6.164  -4.754 -19.694  1.00  0.00           N  
ATOM     53  CA  MET A   7       6.939  -5.810 -20.244  1.00  0.00           C  
ATOM     54  C   MET A   7       6.027  -6.640 -21.093  1.00  0.00           C  
ATOM     55  O   MET A   7       6.428  -7.224 -22.108  1.00  0.00           O  
ATOM     56  CB  MET A   7       7.594  -6.642 -19.144  1.00  0.00           C  
ATOM     57  CG  MET A   7       8.666  -5.906 -18.352  1.00  0.00           C  
ATOM     58  SD  MET A   7       9.954  -5.209 -19.405  1.00  0.00           S  
ATOM     59  CE  MET A   7      10.687  -6.698 -20.075  1.00  0.00           C  
ATOM     60  N   ILE A   8       4.716  -6.753 -20.785  1.00  0.00           N  
ATOM     61  CA  ILE A   8       3.717  -7.468 -21.596  1.00  0.00           C  
ATOM     62  C   ILE A   8       3.493  -6.950 -22.970  1.00  0.00           C  
ATOM     63  O   ILE A   8       3.642  -7.609 -23.942  1.00  0.00           O  
ATOM     64  CB  ILE A   8       2.354  -7.475 -20.880  1.00  0.00           C  
ATOM     65  CG1 ILE A   8       2.415  -8.345 -19.622  1.00  0.00           C  
ATOM     66  CG2 ILE A   8       1.263  -7.968 -21.819  1.00  0.00           C  
ATOM     67  CD1 ILE A   8       1.214  -8.196 -18.717  1.00  0.00           C  
ATOM     68  N   VAL A   9       3.348  -5.603 -23.126  1.00  0.00           N  
ATOM     69  CA  VAL A   9       3.253  -4.855 -24.467  1.00  0.00           C  
ATOM     70  C   VAL A   9       4.620  -4.976 -25.117  1.00  0.00           C  
ATOM     71  O   VAL A   9       4.636  -5.335 -26.291  1.00  0.00           O  
ATOM     72  CB  VAL A   9       2.897  -3.366 -24.296  1.00  0.00           C  
ATOM     73  CG1 VAL A   9       3.009  -2.635 -25.626  1.00  0.00           C  
ATOM     74  CG2 VAL A   9       1.495  -3.231 -23.722  1.00  0.00           C  
ATOM     75  N   ILE A  10       5.774  -4.854 -24.455  1.00  0.00           N  
ATOM     76  CA  ILE A  10       7.081  -4.999 -25.068  1.00  0.00           C  
ATOM     77  C   ILE A  10       7.132  -6.380 -25.705  1.00  0.00           C  
ATOM     78  O   ILE A  10       7.493  -6.551 -26.876  1.00  0.00           O  
ATOM     79  CB  ILE A  10       8.217  -4.835 -24.042  1.00  0.00           C  
ATOM     80  CG1 ILE A  10       8.332  -3.373 -23.603  1.00  0.00           C  
ATOM     81  CG2 ILE A  10       9.534  -5.325 -24.624  1.00  0.00           C  
ATOM     82  CD1 ILE A  10       9.213  -3.166 -22.392  1.00  0.00           C  
ATOM     83  N   ALA A  11       6.692  -7.454 -25.013  1.00  0.00           N  
ATOM     84  CA  ALA A  11       6.601  -8.786 -25.557  1.00  0.00           C  
ATOM     85  C   ALA A  11       5.709  -9.013 -26.814  1.00  0.00           C  
ATOM     86  O   ALA A  11       6.159  -9.703 -27.688  1.00  0.00           O  
ATOM     87  CB  ALA A  11       6.131  -9.698 -24.383  1.00  0.00           C  
ATOM     88  N   ILE A  12       4.543  -8.357 -26.859  1.00  0.00           N  
ATOM     89  CA  ILE A  12       3.601  -8.346 -27.933  1.00  0.00           C  
ATOM     90  C   ILE A  12       4.264  -7.676 -29.171  1.00  0.00           C  
ATOM     91  O   ILE A  12       4.077  -8.044 -30.345  1.00  0.00           O  
ATOM     92  CB  ILE A  12       2.317  -7.602 -27.523  1.00  0.00           C  
ATOM     93  CG1 ILE A  12       1.578  -8.374 -26.427  1.00  0.00           C  
ATOM     94  CG2 ILE A  12       1.416  -7.393 -28.731  1.00  0.00           C  
ATOM     95  CD1 ILE A  12       1.136  -9.757 -26.846  1.00  0.00           C  
ATOM     96  N   VAL A  13       5.026  -6.632 -28.939  1.00  0.00           N  
ATOM     97  CA  VAL A  13       5.793  -5.870 -30.025  1.00  0.00           C  
ATOM     98  C   VAL A  13       6.786  -6.902 -30.652  1.00  0.00           C  
ATOM     99  O   VAL A  13       6.876  -7.080 -31.870  1.00  0.00           O  
ATOM    100  CB  VAL A  13       6.567  -4.667 -29.455  1.00  0.00           C  
ATOM    101  CG1 VAL A  13       7.493  -4.081 -30.511  1.00  0.00           C  
ATOM    102  CG2 VAL A  13       5.591  -3.615 -28.950  1.00  0.00           C  
ATOM    103  N   GLY A  14       7.442  -7.683 -29.780  1.00  0.00           N  
ATOM    104  CA  GLY A  14       8.313  -8.790 -30.110  1.00  0.00           C  
ATOM    105  C   GLY A  14       7.633  -9.843 -30.918  1.00  0.00           C  
ATOM    106  O   GLY A  14       8.239 -10.274 -31.904  1.00  0.00           O  
ATOM    107  N   ILE A  15       6.407 -10.222 -30.519  1.00  0.00           N  
ATOM    108  CA  ILE A  15       5.650 -11.161 -31.268  1.00  0.00           C  
ATOM    109  C   ILE A  15       5.270 -10.573 -32.667  1.00  0.00           C  
ATOM    110  O   ILE A  15       5.547 -11.217 -33.658  1.00  0.00           O  
ATOM    111  CB  ILE A  15       4.388 -11.563 -30.483  1.00  0.00           C  
ATOM    112  CG1 ILE A  15       4.772 -12.312 -29.204  1.00  0.00           C  
ATOM    113  CG2 ILE A  15       3.472 -12.414 -31.348  1.00  0.00           C  
ATOM    114  CD1 ILE A  15       5.529 -13.597 -29.453  1.00  0.00           C  
ATOM    115  N   LEU A  16       4.883  -9.334 -32.691  1.00  0.00           N  
ATOM    116  CA  LEU A  16       4.556  -8.633 -33.992  1.00  0.00           C  
ATOM    117  C   LEU A  16       5.732  -8.700 -35.018  1.00  0.00           C  
ATOM    118  O   LEU A  16       5.481  -8.970 -36.172  1.00  0.00           O  
ATOM    119  CB  LEU A  16       4.204  -7.164 -33.726  1.00  0.00           C  
ATOM    120  CG  LEU A  16       3.833  -6.334 -34.962  1.00  0.00           C  
ATOM    121  CD1 LEU A  16       2.604  -6.937 -35.629  1.00  0.00           C  
ATOM    122  CD2 LEU A  16       3.579  -4.892 -34.549  1.00  0.00           C  
ATOM    123  N   ALA A  17       6.985  -8.521 -34.579  1.00  0.00           N  
ATOM    124  CA  ALA A  17       8.248  -8.660 -35.333  1.00  0.00           C  
ATOM    125  C   ALA A  17       8.393 -10.112 -35.875  1.00  0.00           C  
ATOM    126  O   ALA A  17       8.610 -10.370 -37.056  1.00  0.00           O  
ATOM    127  CB  ALA A  17       9.395  -8.168 -34.450  1.00  0.00           C  
ATOM    128  N   ALA A  18       8.156 -11.100 -34.995  1.00  0.00           N  
ATOM    129  CA  ALA A  18       8.139 -12.522 -35.365  1.00  0.00           C  
ATOM    130  C   ALA A  18       7.000 -12.792 -36.408  1.00  0.00           C  
ATOM    131  O   ALA A  18       7.185 -13.653 -37.378  1.00  0.00           O  
ATOM    132  CB  ALA A  18       7.906 -13.416 -34.189  1.00  0.00           C  
ATOM    133  N   VAL A  19       5.817 -12.184 -36.372  1.00  0.00           N  
ATOM    134  CA  VAL A  19       4.708 -12.231 -37.291  1.00  0.00           C  
ATOM    135  C   VAL A  19       5.109 -11.484 -38.653  1.00  0.00           C  
ATOM    136  O   VAL A  19       4.812 -11.905 -39.751  1.00  0.00           O  
ATOM    137  CB  VAL A  19       3.475 -11.576 -36.642  1.00  0.00           C  
ATOM    138  CG1 VAL A  19       2.353 -11.428 -37.659  1.00  0.00           C  
ATOM    139  CG2 VAL A  19       3.018 -12.402 -35.449  1.00  0.00           C  
ATOM    140  N   ALA A  20       5.759 -10.323 -38.606  1.00  0.00           N  
ATOM    141  CA  ALA A  20       6.245  -9.483 -39.771  1.00  0.00           C  
ATOM    142  C   ALA A  20       7.326 -10.218 -40.657  1.00  0.00           C  
ATOM    143  O   ALA A  20       7.128 -10.279 -41.853  1.00  0.00           O  
ATOM    144  CB  ALA A  20       6.968  -8.197 -39.294  1.00  0.00           C  
ATOM    145  N   LEU A  21       8.233 -11.012 -40.065  1.00  0.00           N  
ATOM    146  CA  LEU A  21       9.328 -11.735 -40.679  1.00  0.00           C  
ATOM    147  C   LEU A  21       8.862 -12.655 -41.870  1.00  0.00           C  
ATOM    148  O   LEU A  21       9.437 -12.490 -42.928  1.00  0.00           O  
ATOM    149  CB  LEU A  21      10.031 -12.573 -39.603  1.00  0.00           C  
ATOM    150  CG  LEU A  21      11.073 -13.574 -40.117  1.00  0.00           C  
ATOM    151  CD1 LEU A  21      12.188 -12.825 -40.834  1.00  0.00           C  
ATOM    152  CD2 LEU A  21      11.620 -14.382 -38.949  1.00  0.00           C  
ATOM    153  N   PRO A  22       8.003 -13.675 -41.683  1.00  0.00           N  
ATOM    154  CA  PRO A  22       7.599 -14.539 -42.754  1.00  0.00           C  
ATOM    155  C   PRO A  22       6.606 -13.801 -43.803  1.00  0.00           C  
ATOM    156  O   PRO A  22       6.701 -14.119 -44.992  1.00  0.00           O  
ATOM    157  CB  PRO A  22       6.910 -15.665 -41.976  1.00  0.00           C  
ATOM    158  CG  PRO A  22       6.327 -14.983 -40.786  1.00  0.00           C  
ATOM    159  CD  PRO A  22       7.358 -13.957 -40.399  1.00  0.00           C  
ATOM    160  N   ALA A  23       5.819 -12.791 -43.352  1.00  0.00           N  
ATOM    161  CA  ALA A  23       4.970 -11.928 -44.227  1.00  0.00           C  
ATOM    162  C   ALA A  23       5.790 -10.985 -45.136  1.00  0.00           C  
ATOM    163  O   ALA A  23       5.569 -10.998 -46.322  1.00  0.00           O  
ATOM    164  CB  ALA A  23       4.035 -11.186 -43.223  1.00  0.00           C  
ATOM    165  N   TYR A  24       6.782 -10.289 -44.627  1.00  0.00           N  
ATOM    166  CA  TYR A  24       7.725  -9.591 -45.391  1.00  0.00           C  
ATOM    167  C   TYR A  24       8.523 -10.443 -46.382  1.00  0.00           C  
ATOM    168  O   TYR A  24       8.509 -10.024 -47.571  1.00  0.00           O  
ATOM    169  CB  TYR A  24       8.670  -8.863 -44.432  1.00  0.00           C  
ATOM    170  CG  TYR A  24       9.758  -8.077 -45.128  1.00  0.00           C  
ATOM    171  CD1 TYR A  24       9.520  -6.771 -45.533  1.00  0.00           C  
ATOM    172  CD2 TYR A  24      10.995  -8.660 -45.362  1.00  0.00           C  
ATOM    173  CE1 TYR A  24      10.514  -6.053 -46.168  1.00  0.00           C  
ATOM    174  CE2 TYR A  24      11.988  -7.942 -45.998  1.00  0.00           C  
ATOM    175  CZ  TYR A  24      11.751  -6.643 -46.400  1.00  0.00           C  
ATOM    176  OH  TYR A  24      12.741  -5.927 -47.033  1.00  0.00           O  
ATOM    177  N   GLN A  25       9.146 -11.602 -46.063  1.00  0.00           N  
ATOM    178  CA  GLN A  25       9.812 -12.506 -46.969  1.00  0.00           C  
ATOM    179  C   GLN A  25       8.919 -12.995 -48.136  1.00  0.00           C  
ATOM    180  O   GLN A  25       9.324 -12.844 -49.262  1.00  0.00           O  
ATOM    181  CB  GLN A  25      10.341 -13.706 -46.180  1.00  0.00           C  
ATOM    182  CG  GLN A  25      11.514 -13.384 -45.269  1.00  0.00           C  
ATOM    183  CD  GLN A  25      11.920 -14.565 -44.408  1.00  0.00           C  
ATOM    184  NE2 GLN A  25      13.157 -14.547 -43.926  1.00  0.00           N  
ATOM    185  OE1 GLN A  25      11.130 -15.485 -44.179  1.00  0.00           O  
ATOM    186  N   ASP A  26       7.744 -13.501 -47.853  1.00  0.00           N  
ATOM    187  CA  ASP A  26       6.823 -13.882 -48.920  1.00  0.00           C  
ATOM    188  C   ASP A  26       6.334 -12.817 -49.885  1.00  0.00           C  
ATOM    189  O   ASP A  26       6.430 -12.985 -51.055  1.00  0.00           O  
ATOM    190  CB  ASP A  26       5.592 -14.533 -48.286  1.00  0.00           C  
ATOM    191  CG  ASP A  26       4.637 -15.124 -49.315  1.00  0.00           C  
ATOM    192  OD1 ASP A  26       5.019 -16.054 -49.985  1.00  0.00           O  
ATOM    193  OD2 ASP A  26       3.536 -14.639 -49.421  1.00  0.00           O1-
ATOM    194  N   TYR A  27       5.915 -11.635 -49.404  1.00  0.00           N  
ATOM    195  CA  TYR A  27       5.493 -10.468 -50.184  1.00  0.00           C  
ATOM    196  C   TYR A  27       6.602  -9.932 -51.113  1.00  0.00           C  
ATOM    197  O   TYR A  27       6.425  -9.719 -52.304  1.00  0.00           O  
ATOM    198  CB  TYR A  27       5.018  -9.360 -49.241  1.00  0.00           C  
ATOM    199  CG  TYR A  27       4.753  -8.042 -49.934  1.00  0.00           C  
ATOM    200  CD1 TYR A  27       3.778  -7.959 -50.918  1.00  0.00           C  
ATOM    201  CD2 TYR A  27       5.484  -6.916 -49.585  1.00  0.00           C  
ATOM    202  CE1 TYR A  27       3.536  -6.755 -51.551  1.00  0.00           C  
ATOM    203  CE2 TYR A  27       5.242  -5.712 -50.218  1.00  0.00           C  
ATOM    204  CZ  TYR A  27       4.272  -5.629 -51.196  1.00  0.00           C  
ATOM    205  OH  TYR A  27       4.031  -4.430 -51.826  1.00  0.00           O  
ATOM    206  N   THR A  28       7.758  -9.690 -50.582  1.00  0.00           N  
ATOM    207  CA  THR A  28       8.902  -9.143 -51.288  1.00  0.00           C  
ATOM    208  C   THR A  28       9.543 -10.174 -52.293  1.00  0.00           C  
ATOM    209  O   THR A  28      10.017  -9.805 -53.356  1.00  0.00           O  
ATOM    210  CB  THR A  28       9.958  -8.661 -50.276  1.00  0.00           C  
ATOM    211  CG2 THR A  28       9.394  -7.550 -49.404  1.00  0.00           C  
ATOM    212  OG1 THR A  28      10.362  -9.757 -49.445  1.00  0.00           O  
ATOM    213  N   ALA A  29       9.416 -11.473 -51.972  1.00  0.00           N  
ATOM    214  CA  ALA A  29       9.815 -12.500 -52.854  1.00  0.00           C  
ATOM    215  C   ALA A  29       9.023 -12.436 -54.184  1.00  0.00           C  
ATOM    216  O   ALA A  29       9.655 -12.497 -55.228  1.00  0.00           O  
ATOM    217  CB  ALA A  29       9.531 -13.892 -52.169  1.00  0.00           C  
ATOM    218  N   ARG A  30       7.696 -12.246 -54.139  1.00  0.00           N  
ATOM    219  CA  ARG A  30       6.830 -12.012 -55.285  1.00  0.00           C  
ATOM    220  C   ARG A  30       7.291 -10.821 -56.099  1.00  0.00           C  
ATOM    221  O   ARG A  30       7.358 -10.776 -57.326  1.00  0.00           O  
ATOM    222  CB  ARG A  30       5.396 -11.782 -54.831  1.00  0.00           C  
ATOM    223  CG  ARG A  30       4.405 -11.518 -55.954  1.00  0.00           C  
ATOM    224  CD  ARG A  30       3.025 -11.330 -55.436  1.00  0.00           C  
ATOM    225  NE  ARG A  30       2.081 -11.037 -56.502  1.00  0.00           N  
ATOM    226  CZ  ARG A  30       1.822  -9.803 -56.976  1.00  0.00           C  
ATOM    227  NH1 ARG A  30       2.442  -8.761 -56.471  1.00  0.00           N1+
ATOM    228  NH2 ARG A  30       0.943  -9.641 -57.950  1.00  0.00           N  
ATOM    229  N   ALA A  31       7.590  -9.695 -55.459  1.00  0.00           N  
ATOM    230  CA  ALA A  31       8.187  -8.506 -56.076  1.00  0.00           C  
ATOM    231  C   ALA A  31       9.540  -8.687 -56.774  1.00  0.00           C  
ATOM    232  O   ALA A  31       9.805  -8.047 -57.817  1.00  0.00           O  
ATOM    233  CB  ALA A  31       8.268  -7.304 -55.104  1.00  0.00           C  
ATOM    234  N   GLN A  32      10.461  -9.491 -56.122  1.00  0.00           N  
ATOM    235  CA  GLN A  32      11.799  -9.882 -56.618  1.00  0.00           C  
ATOM    236  C   GLN A  32      11.756 -10.674 -57.958  1.00  0.00           C  
ATOM    237  O   GLN A  32      12.436 -10.263 -58.911  1.00  0.00           O  
ATOM    238  CB  GLN A  32      12.521 -10.714 -55.554  1.00  0.00           C  
ATOM    239  CG  GLN A  32      12.955  -9.922 -54.334  1.00  0.00           C  
ATOM    240  CD  GLN A  32      13.261 -10.812 -53.144  1.00  0.00           C  
ATOM    241  NE2 GLN A  32      13.443 -10.201 -51.979  1.00  0.00           N  
ATOM    242  OE1 GLN A  32      13.334 -12.038 -53.271  1.00  0.00           O  
ATOM    243  N   VAL A  33      10.882 -11.663 -58.008  1.00  0.00           N  
ATOM    244  CA  VAL A  33      10.529 -12.599 -59.129  1.00  0.00           C  
ATOM    245  C   VAL A  33       9.855 -11.863 -60.308  1.00  0.00           C  
ATOM    246  O   VAL A  33      10.146 -12.066 -61.482  1.00  0.00           O  
ATOM    247  CB  VAL A  33       9.582 -13.705 -58.628  1.00  0.00           C  
ATOM    248  CG1 VAL A  33       9.062 -14.531 -59.795  1.00  0.00           C  
ATOM    249  CG2 VAL A  33      10.304 -14.588 -57.622  1.00  0.00           C  
ATOM    250  N   SER A  34       8.826 -11.076 -59.975  1.00  0.00           N  
ATOM    251  CA  SER A  34       8.116 -10.221 -60.966  1.00  0.00           C  
ATOM    252  C   SER A  34       8.995  -9.110 -61.579  1.00  0.00           C  
ATOM    253  O   SER A  34       8.789  -8.954 -62.790  1.00  0.00           O  
ATOM    254  CB  SER A  34       6.904  -9.586 -60.313  1.00  0.00           C  
ATOM    255  OG  SER A  34       7.287  -8.698 -59.300  1.00  0.00           O  
ATOM    256  N   GLU A  35      10.031  -8.612 -60.855  1.00  0.00           N  
ATOM    257  CA  GLU A  35      11.045  -7.756 -61.558  1.00  0.00           C  
ATOM    258  C   GLU A  35      11.705  -8.578 -62.696  1.00  0.00           C  
ATOM    259  O   GLU A  35      11.848  -8.115 -63.852  1.00  0.00           O  
ATOM    260  CB  GLU A  35      12.114  -7.252 -60.585  1.00  0.00           C  
ATOM    261  CG  GLU A  35      13.190  -6.388 -61.226  1.00  0.00           C  
ATOM    262  CD  GLU A  35      14.173  -5.841 -60.228  1.00  0.00           C  
ATOM    263  OE1 GLU A  35      14.940  -6.608 -59.697  1.00  0.00           O  
ATOM    264  OE2 GLU A  35      14.157  -4.655 -59.997  1.00  0.00           O1-
ATOM    265  N   ALA A  36      12.133  -9.778 -62.402  1.00  0.00           N  
ATOM    266  CA  ALA A  36      12.738 -10.630 -63.466  1.00  0.00           C  
ATOM    267  C   ALA A  36      11.837 -10.883 -64.614  1.00  0.00           C  
ATOM    268  O   ALA A  36      12.294 -10.875 -65.732  1.00  0.00           O  
ATOM    269  CB  ALA A  36      13.214 -11.908 -62.768  1.00  0.00           C  
ATOM    270  N   ILE A  37      10.586 -11.104 -64.316  1.00  0.00           N  
ATOM    271  CA  ILE A  37       9.624 -11.359 -65.400  1.00  0.00           C  
ATOM    272  C   ILE A  37       9.482 -10.159 -66.270  1.00  0.00           C  
ATOM    273  O   ILE A  37       9.416 -10.307 -67.452  1.00  0.00           O  
ATOM    274  CB  ILE A  37       8.238 -11.745 -64.852  1.00  0.00           C  
ATOM    275  CG1 ILE A  37       8.311 -13.080 -64.107  1.00  0.00           C  
ATOM    276  CG2 ILE A  37       7.221 -11.817 -65.981  1.00  0.00           C  
ATOM    277  CD1 ILE A  37       8.757 -14.238 -64.970  1.00  0.00           C  
ATOM    278  N   LEU A  38       9.388  -8.964 -65.662  1.00  0.00           N  
ATOM    279  CA  LEU A  38       9.229  -7.696 -66.415  1.00  0.00           C  
ATOM    280  C   LEU A  38      10.435  -7.453 -67.341  1.00  0.00           C  
ATOM    281  O   LEU A  38      10.362  -7.119 -68.529  1.00  0.00           O  
ATOM    282  CB  LEU A  38       9.076  -6.515 -65.448  1.00  0.00           C  
ATOM    283  CG  LEU A  38       8.969  -5.131 -66.100  1.00  0.00           C  
ATOM    284  CD1 LEU A  38       7.839  -5.136 -67.121  1.00  0.00           C  
ATOM    285  CD2 LEU A  38       8.732  -4.080 -65.026  1.00  0.00           C  
ATOM    286  N   LEU A  39      11.622  -7.714 -66.806  1.00  0.00           N  
ATOM    287  CA  LEU A  39      12.962  -7.583 -67.486  1.00  0.00           C  
ATOM    288  C   LEU A  39      12.935  -8.608 -68.681  1.00  0.00           C  
ATOM    289  O   LEU A  39      13.512  -8.307 -69.709  1.00  0.00           O  
ATOM    290  CB  LEU A  39      14.119  -7.885 -66.526  1.00  0.00           C  
ATOM    291  CG  LEU A  39      14.420  -6.801 -65.483  1.00  0.00           C  
ATOM    292  CD1 LEU A  39      15.424  -7.334 -64.470  1.00  0.00           C  
ATOM    293  CD2 LEU A  39      14.954  -5.559 -66.182  1.00  0.00           C  
ATOM    294  N   ALA A  40      12.419  -9.806 -68.512  1.00  0.00           N  
ATOM    295  CA  ALA A  40      12.239 -10.727 -69.547  1.00  0.00           C  
ATOM    296  C   ALA A  40      11.227 -10.368 -70.676  1.00  0.00           C  
ATOM    297  O   ALA A  40      11.347 -10.702 -71.848  1.00  0.00           O  
ATOM    298  CB  ALA A  40      11.832 -12.024 -68.820  1.00  0.00           C  
ATOM    299  N   GLU A  41      10.133  -9.698 -70.265  1.00  0.00           N  
ATOM    300  CA  GLU A  41       9.107  -9.119 -71.184  1.00  0.00           C  
ATOM    301  C   GLU A  41       9.680  -8.009 -72.076  1.00  0.00           C  
ATOM    302  O   GLU A  41      10.403  -7.106 -71.613  1.00  0.00           O  
ATOM    303  CB  GLU A  41       7.927  -8.562 -70.384  1.00  0.00           C  
ATOM    304  CG  GLU A  41       7.097  -9.618 -69.670  1.00  0.00           C  
ATOM    305  CD  GLU A  41       6.301 -10.475 -70.615  1.00  0.00           C  
ATOM    306  OE1 GLU A  41       5.704  -9.936 -71.516  1.00  0.00           O  
ATOM    307  OE2 GLU A  41       6.291 -11.670 -70.436  1.00  0.00           O1-
ATOM    308  N   GLY A  42       9.236  -7.977 -73.389  1.00  0.00           N  
ATOM    309  CA  GLY A  42       9.761  -7.044 -74.414  1.00  0.00           C  
ATOM    310  C   GLY A  42      11.073  -7.602 -75.072  1.00  0.00           C  
ATOM    311  O   GLY A  42      11.163  -7.522 -76.299  1.00  0.00           O  
ATOM    312  N   GLN A  43      11.991  -8.133 -74.232  1.00  0.00           N  
ATOM    313  CA  GLN A  43      13.171  -8.873 -74.677  1.00  0.00           C  
ATOM    314  C   GLN A  43      12.666 -10.131 -75.459  1.00  0.00           C  
ATOM    315  O   GLN A  43      13.123 -10.424 -76.576  1.00  0.00           O  
ATOM    316  CB  GLN A  43      14.053  -9.268 -73.490  1.00  0.00           C  
ATOM    317  CG  GLN A  43      15.337  -9.981 -73.878  1.00  0.00           C  
ATOM    318  CD  GLN A  43      16.215 -10.285 -72.679  1.00  0.00           C  
ATOM    319  NE2 GLN A  43      17.491 -10.549 -72.934  1.00  0.00           N  
ATOM    320  OE1 GLN A  43      15.751 -10.284 -71.536  1.00  0.00           O  
ATOM    321  N   LYS A  44      11.668 -10.860 -75.003  1.00  0.00           N  
ATOM    322  CA  LYS A  44      11.033 -12.030 -75.579  1.00  0.00           C  
ATOM    323  C   LYS A  44      10.327 -11.626 -76.959  1.00  0.00           C  
ATOM    324  O   LYS A  44      10.178 -12.450 -77.831  1.00  0.00           O  
ATOM    325  CB  LYS A  44      10.033 -12.620 -74.582  1.00  0.00           C  
ATOM    326  CG  LYS A  44       8.699 -11.888 -74.521  1.00  0.00           C  
ATOM    327  CD  LYS A  44       7.717 -12.604 -73.606  1.00  0.00           C  
ATOM    328  CE  LYS A  44       6.299 -12.091 -73.804  1.00  0.00           C  
ATOM    329  NZ  LYS A  44       5.336 -12.743 -72.876  1.00  0.00           N1+
ATOM    330  N   SER A  45       9.911 -10.368 -77.078  1.00  0.00           N  
ATOM    331  CA  SER A  45       9.340  -9.825 -78.307  1.00  0.00           C  
ATOM    332  C   SER A  45      10.421  -9.578 -79.378  1.00  0.00           C  
ATOM    333  O   SER A  45      10.203 -10.013 -80.488  1.00  0.00           O  
ATOM    334  CB  SER A  45       8.607  -8.533 -78.004  1.00  0.00           C  
ATOM    335  OG  SER A  45       7.492  -8.767 -77.188  1.00  0.00           O  
ATOM    336  N   ALA A  46      11.575  -9.059 -78.972  1.00  0.00           N  
ATOM    337  CA  ALA A  46      12.716  -9.090 -79.907  1.00  0.00           C  
ATOM    338  C   ALA A  46      13.220 -10.498 -80.365  1.00  0.00           C  
ATOM    339  O   ALA A  46      13.512 -10.754 -81.575  1.00  0.00           O  
ATOM    340  CB  ALA A  46      13.856  -8.316 -79.206  1.00  0.00           C  
ATOM    341  N   VAL A  47      13.224 -11.484 -79.441  1.00  0.00           N  
ATOM    342  CA  VAL A  47      13.506 -12.901 -79.729  1.00  0.00           C  
ATOM    343  C   VAL A  47      12.371 -13.393 -80.668  1.00  0.00           C  
ATOM    344  O   VAL A  47      12.657 -14.128 -81.575  1.00  0.00           O  
ATOM    345  CB  VAL A  47      13.548 -13.740 -78.438  1.00  0.00           C  
ATOM    346  CG1 VAL A  47      13.638 -15.222 -78.770  1.00  0.00           C  
ATOM    347  CG2 VAL A  47      14.725 -13.307 -77.577  1.00  0.00           C  
ATOM    348  N   THR A  48      11.119 -13.108 -80.362  1.00  0.00           N  
ATOM    349  CA  THR A  48      10.088 -13.432 -81.327  1.00  0.00           C  
ATOM    350  C   THR A  48      10.281 -12.882 -82.722  1.00  0.00           C  
ATOM    351  O   THR A  48      10.165 -13.684 -83.665  1.00  0.00           O  
ATOM    352  CB  THR A  48       8.721 -12.954 -80.804  1.00  0.00           C  
ATOM    353  CG2 THR A  48       7.632 -13.227 -81.830  1.00  0.00           C  
ATOM    354  OG1 THR A  48       8.407 -13.639 -79.585  1.00  0.00           O  
ATOM    355  N   GLU A  49      10.615 -11.613 -82.853  1.00  0.00           N  
ATOM    356  CA  GLU A  49      10.861 -10.940 -84.146  1.00  0.00           C  
ATOM    357  C   GLU A  49      12.025 -11.528 -84.936  1.00  0.00           C  
ATOM    358  O   GLU A  49      11.895 -11.743 -86.139  1.00  0.00           O  
ATOM    359  CB  GLU A  49      11.120  -9.449 -83.918  1.00  0.00           C  
ATOM    360  CG  GLU A  49       9.912  -8.670 -83.418  1.00  0.00           C  
ATOM    361  CD  GLU A  49       8.839  -8.521 -84.461  1.00  0.00           C  
ATOM    362  OE1 GLU A  49       9.138  -8.046 -85.530  1.00  0.00           O  
ATOM    363  OE2 GLU A  49       7.719  -8.884 -84.188  1.00  0.00           O1-
ATOM    364  N   TYR A  50      13.131 -11.977 -84.251  1.00  0.00           N  
ATOM    365  CA  TYR A  50      14.180 -12.729 -84.854  1.00  0.00           C  
ATOM    366  C   TYR A  50      13.725 -14.184 -85.337  1.00  0.00           C  
ATOM    367  O   TYR A  50      13.852 -14.605 -86.478  1.00  0.00           O  
ATOM    368  CB  TYR A  50      15.340 -12.808 -83.858  1.00  0.00           C  
ATOM    369  CG  TYR A  50      16.568 -13.500 -84.406  1.00  0.00           C  
ATOM    370  CD1 TYR A  50      17.638 -12.749 -84.871  1.00  0.00           C  
ATOM    371  CD2 TYR A  50      16.626 -14.885 -84.443  1.00  0.00           C  
ATOM    372  CE1 TYR A  50      18.760 -13.380 -85.371  1.00  0.00           C  
ATOM    373  CE2 TYR A  50      17.748 -15.517 -84.944  1.00  0.00           C  
ATOM    374  CZ  TYR A  50      18.812 -14.769 -85.406  1.00  0.00           C  
ATOM    375  OH  TYR A  50      19.929 -15.398 -85.905  1.00  0.00           O  
ATOM    376  N   TYR A  51      13.176 -14.992 -84.380  1.00  0.00           N  
ATOM    377  CA  TYR A  51      12.759 -16.386 -84.656  1.00  0.00           C  
ATOM    378  C   TYR A  51      11.711 -16.588 -85.810  1.00  0.00           C  
ATOM    379  O   TYR A  51      11.899 -17.314 -86.784  1.00  0.00           O  
ATOM    380  CB  TYR A  51      12.212 -16.995 -83.362  1.00  0.00           C  
ATOM    381  CG  TYR A  51      11.761 -18.431 -83.507  1.00  0.00           C  
ATOM    382  CD1 TYR A  51      12.685 -19.421 -83.808  1.00  0.00           C  
ATOM    383  CD2 TYR A  51      10.424 -18.758 -83.337  1.00  0.00           C  
ATOM    384  CE1 TYR A  51      12.273 -20.733 -83.940  1.00  0.00           C  
ATOM    385  CE2 TYR A  51      10.012 -20.070 -83.469  1.00  0.00           C  
ATOM    386  CZ  TYR A  51      10.931 -21.055 -83.769  1.00  0.00           C  
ATOM    387  OH  TYR A  51      10.520 -22.362 -83.901  1.00  0.00           O  
ATOM    388  N   LEU A  52      10.643 -15.827 -85.640  1.00  0.00           N  
ATOM    389  CA  LEU A  52       9.598 -15.741 -86.632  1.00  0.00           C  
ATOM    390  C   LEU A  52       9.961 -15.369 -88.133  1.00  0.00           C  
ATOM    391  O   LEU A  52       9.193 -15.774 -89.004  1.00  0.00           O  
ATOM    392  CB  LEU A  52       8.581 -14.724 -86.100  1.00  0.00           C  
ATOM    393  CG  LEU A  52       7.301 -14.566 -86.930  1.00  0.00           C  
ATOM    394  CD1 LEU A  52       6.571 -15.900 -86.999  1.00  0.00           C  
ATOM    395  CD2 LEU A  52       6.421 -13.492 -86.308  1.00  0.00           C  
ATOM    396  N   ASN A  53      10.946 -14.571 -88.432  1.00  0.00           N  
ATOM    397  CA  ASN A  53      11.378 -14.149 -89.715  1.00  0.00           C  
ATOM    398  C   ASN A  53      12.657 -14.888 -90.167  1.00  0.00           C  
ATOM    399  O   ASN A  53      12.786 -15.167 -91.330  1.00  0.00           O  
ATOM    400  CB  ASN A  53      11.641 -12.658 -89.688  1.00  0.00           C  
ATOM    401  CG  ASN A  53      10.347 -11.829 -89.489  1.00  0.00           C  
ATOM    402  ND2 ASN A  53      10.068 -11.274 -88.337  1.00  0.00           N  
ATOM    403  OD1 ASN A  53       9.539 -11.752 -90.389  1.00  0.00           O  
ATOM    404  N   HIS A  54      13.584 -15.292 -89.286  1.00  0.00           N  
ATOM    405  CA  HIS A  54      14.788 -16.042 -89.594  1.00  0.00           C  
ATOM    406  C   HIS A  54      14.631 -17.575 -89.684  1.00  0.00           C  
ATOM    407  O   HIS A  54      15.199 -18.296 -90.486  1.00  0.00           O  
ATOM    408  CB  HIS A  54      15.856 -15.713 -88.546  1.00  0.00           C  
ATOM    409  CG  HIS A  54      16.330 -14.294 -88.595  1.00  0.00           C  
ATOM    410  CD2 HIS A  54      17.483 -13.754 -89.055  1.00  0.00           C  
ATOM    411  ND1 HIS A  54      15.572 -13.240 -88.128  1.00  0.00           N  
ATOM    412  CE1 HIS A  54      16.241 -12.112 -88.299  1.00  0.00           C  
ATOM    413  NE2 HIS A  54      17.402 -12.397 -88.860  1.00  0.00           N  
ATOM    414  N   GLY A  55      13.728 -18.129 -88.783  1.00  0.00           N  
ATOM    415  CA  GLY A  55      13.406 -19.566 -88.678  1.00  0.00           C  
ATOM    416  C   GLY A  55      14.094 -20.225 -87.502  1.00  0.00           C  
ATOM    417  O   GLY A  55      13.463 -21.181 -87.045  1.00  0.00           O  
ATOM    418  N   LYS A  56      15.265 -19.816 -87.109  1.00  0.00           N  
ATOM    419  CA  LYS A  56      15.929 -20.450 -85.960  1.00  0.00           C  
ATOM    420  C   LYS A  56      16.080 -19.503 -84.763  1.00  0.00           C  
ATOM    421  O   LYS A  56      15.964 -18.343 -84.859  1.00  0.00           O  
ATOM    422  CB  LYS A  56      17.303 -20.979 -86.375  1.00  0.00           C  
ATOM    423  CG  LYS A  56      17.268 -22.020 -87.485  1.00  0.00           C  
ATOM    424  CD  LYS A  56      16.593 -23.302 -87.020  1.00  0.00           C  
ATOM    425  CE  LYS A  56      16.621 -24.369 -88.105  1.00  0.00           C  
ATOM    426  NZ  LYS A  56      16.015 -25.647 -87.644  1.00  0.00           N1+
ATOM    427  N   TRP A  57      16.208 -20.062 -83.568  1.00  0.00           N  
ATOM    428  CA  TRP A  57      16.246 -19.215 -82.328  1.00  0.00           C  
ATOM    429  C   TRP A  57      17.557 -18.445 -82.227  1.00  0.00           C  
ATOM    430  O   TRP A  57      18.613 -18.972 -82.646  1.00  0.00           O  
ATOM    431  CB  TRP A  57      16.074 -20.070 -81.071  1.00  0.00           C  
ATOM    432  CG  TRP A  57      14.701 -20.652 -80.926  1.00  0.00           C  
ATOM    433  CD1 TRP A  57      14.321 -21.927 -81.221  1.00  0.00           C  
ATOM    434  CD2 TRP A  57      13.511 -19.980 -80.447  1.00  0.00           C  
ATOM    435  CE2 TRP A  57      12.472 -20.913 -80.485  1.00  0.00           C  
ATOM    436  CE3 TRP A  57      13.250 -18.680 -79.994  1.00  0.00           C  
ATOM    437  NE1 TRP A  57      12.983 -22.094 -80.961  1.00  0.00           N  
ATOM    438  CZ2 TRP A  57      11.183 -20.592 -80.089  1.00  0.00           C  
ATOM    439  CZ3 TRP A  57      11.958 -18.359 -79.596  1.00  0.00           C  
ATOM    440  CH2 TRP A  57      10.952 -19.291 -79.642  1.00  0.00           C  
ATOM    441  N   PRO A  58      17.471 -17.141 -81.664  1.00  0.00           N  
ATOM    442  CA  PRO A  58      18.749 -16.387 -81.532  1.00  0.00           C  
ATOM    443  C   PRO A  58      19.639 -16.931 -80.411  1.00  0.00           C  
ATOM    444  O   PRO A  58      19.134 -17.504 -79.451  1.00  0.00           O  
ATOM    445  CB  PRO A  58      18.278 -14.963 -81.221  1.00  0.00           C  
ATOM    446  CG  PRO A  58      16.991 -15.155 -80.493  1.00  0.00           C  
ATOM    447  CD  PRO A  58      16.336 -16.317 -81.190  1.00  0.00           C  
ATOM    448  N   GLU A  59      20.935 -16.848 -80.542  1.00  0.00           N  
ATOM    449  CA  GLU A  59      21.934 -17.339 -79.553  1.00  0.00           C  
ATOM    450  C   GLU A  59      22.009 -16.626 -78.233  1.00  0.00           C  
ATOM    451  O   GLU A  59      21.878 -17.171 -77.139  1.00  0.00           O  
ATOM    452  CB  GLU A  59      23.332 -17.296 -80.176  1.00  0.00           C  
ATOM    453  CG  GLU A  59      24.443 -17.794 -79.262  1.00  0.00           C  
ATOM    454  CD  GLU A  59      25.796 -17.761 -79.916  1.00  0.00           C  
ATOM    455  OE1 GLU A  59      25.869 -17.414 -81.070  1.00  0.00           O  
ATOM    456  OE2 GLU A  59      26.759 -18.082 -79.259  1.00  0.00           O1-
ATOM    457  N   ASN A  60      22.145 -15.294 -78.236  1.00  0.00           N  
ATOM    458  CA  ASN A  60      22.325 -14.356 -77.115  1.00  0.00           C  
ATOM    459  C   ASN A  60      21.667 -13.027 -77.383  1.00  0.00           C  
ATOM    460  O   ASN A  60      20.999 -12.677 -78.354  1.00  0.00           O  
ATOM    461  CB  ASN A  60      23.798 -14.154 -76.812  1.00  0.00           C  
ATOM    462  CG  ASN A  60      24.544 -13.530 -77.959  1.00  0.00           C  
ATOM    463  ND2 ASN A  60      25.771 -13.943 -78.151  1.00  0.00           N  
ATOM    464  OD1 ASN A  60      24.008 -12.674 -78.672  1.00  0.00           O  
ATOM    465  N   ASN A  61      21.842 -12.091 -76.403  1.00  0.00           N  
ATOM    466  CA  ASN A  61      21.280 -10.730 -76.381  1.00  0.00           C  
ATOM    467  C   ASN A  61      21.626  -9.923 -77.626  1.00  0.00           C  
ATOM    468  O   ASN A  61      20.737  -9.219 -78.139  1.00  0.00           O  
ATOM    469  CB  ASN A  61      21.743  -9.989 -75.140  1.00  0.00           C  
ATOM    470  CG  ASN A  61      21.077 -10.487 -73.887  1.00  0.00           C  
ATOM    471  ND2 ASN A  61      21.510  -9.988 -72.757  1.00  0.00           N  
ATOM    472  OD1 ASN A  61      20.169 -11.324 -73.943  1.00  0.00           O  
ATOM    473  N   THR A  62      22.815  -9.991 -78.114  1.00  0.00           N  
ATOM    474  CA  THR A  62      23.263  -9.320 -79.396  1.00  0.00           C  
ATOM    475  C   THR A  62      22.796  -9.885 -80.754  1.00  0.00           C  
ATOM    476  O   THR A  62      22.527  -9.222 -81.771  1.00  0.00           O  
ATOM    477  CB  THR A  62      24.801  -9.275 -79.437  1.00  0.00           C  
ATOM    478  CG2 THR A  62      25.347  -8.543 -78.221  1.00  0.00           C  
ATOM    479  OG1 THR A  62      25.320 -10.611 -79.459  1.00  0.00           O  
ATOM    480  N   SER A  63      22.476 -11.154 -80.698  1.00  0.00           N  
ATOM    481  CA  SER A  63      21.790 -11.821 -81.814  1.00  0.00           C  
ATOM    482  C   SER A  63      20.308 -11.674 -81.797  1.00  0.00           C  
ATOM    483  O   SER A  63      19.707 -11.470 -82.866  1.00  0.00           O  
ATOM    484  CB  SER A  63      22.123 -13.301 -81.818  1.00  0.00           C  
ATOM    485  OG  SER A  63      21.548 -13.947 -80.715  1.00  0.00           O  
ATOM    486  N   ALA A  64      19.646 -11.487 -80.656  1.00  0.00           N  
ATOM    487  CA  ALA A  64      18.166 -11.281 -80.546  1.00  0.00           C  
ATOM    488  C   ALA A  64      17.688  -9.863 -80.811  1.00  0.00           C  
ATOM    489  O   ALA A  64      16.495  -9.585 -80.977  1.00  0.00           O  
ATOM    490  CB  ALA A  64      17.818 -11.753 -79.081  1.00  0.00           C  
ATOM    491  N   GLY A  65      18.672  -8.903 -80.813  1.00  0.00           N  
ATOM    492  CA  GLY A  65      18.383  -7.429 -80.996  1.00  0.00           C  
ATOM    493  C   GLY A  65      18.179  -6.603 -79.713  1.00  0.00           C  
ATOM    494  O   GLY A  65      17.515  -5.543 -79.781  1.00  0.00           O  
ATOM    495  N   VAL A  66      18.717  -7.001 -78.559  1.00  0.00           N  
ATOM    496  CA  VAL A  66      18.537  -6.219 -77.346  1.00  0.00           C  
ATOM    497  C   VAL A  66      19.849  -5.708 -76.639  1.00  0.00           C  
ATOM    498  O   VAL A  66      20.987  -5.876 -77.230  1.00  0.00           O  
ATOM    499  CB  VAL A  66      17.730  -7.071 -76.349  1.00  0.00           C  
ATOM    500  CG1 VAL A  66      16.363  -7.411 -76.923  1.00  0.00           C  
ATOM    501  CG2 VAL A  66      18.502  -8.336 -76.006  1.00  0.00           C  
ATOM    502  N   ALA A  67      19.698  -5.033 -75.461  1.00  0.00           N  
ATOM    503  CA  ALA A  67      20.860  -4.524 -74.781  1.00  0.00           C  
ATOM    504  C   ALA A  67      21.932  -5.643 -74.697  1.00  0.00           C  
ATOM    505  O   ALA A  67      21.715  -6.754 -74.190  1.00  0.00           O  
ATOM    506  CB  ALA A  67      20.507  -3.964 -73.389  1.00  0.00           C  
ATOM    507  N   SER A  68      23.191  -5.281 -75.022  1.00  0.00           N  
ATOM    508  CA  SER A  68      24.275  -6.187 -75.259  1.00  0.00           C  
ATOM    509  C   SER A  68      24.733  -6.875 -73.967  1.00  0.00           C  
ATOM    510  O   SER A  68      25.293  -7.946 -74.041  1.00  0.00           O  
ATOM    511  CB  SER A  68      25.431  -5.436 -75.891  1.00  0.00           C  
ATOM    512  OG  SER A  68      25.963  -4.492 -75.003  1.00  0.00           O  
ATOM    513  N   SER A  69      24.654  -6.212 -72.821  1.00  0.00           N  
ATOM    514  CA  SER A  69      25.048  -6.882 -71.618  1.00  0.00           C  
ATOM    515  C   SER A  69      23.937  -7.357 -70.744  1.00  0.00           C  
ATOM    516  O   SER A  69      23.001  -6.596 -70.545  1.00  0.00           O  
ATOM    517  CB  SER A  69      25.936  -5.956 -70.809  1.00  0.00           C  
ATOM    518  OG  SER A  69      26.231  -6.511 -69.557  1.00  0.00           O  
ATOM    519  N   PRO A  70      24.005  -8.507 -70.093  1.00  0.00           N  
ATOM    520  CA  PRO A  70      23.041  -8.947 -69.140  1.00  0.00           C  
ATOM    521  C   PRO A  70      22.776  -7.918 -68.026  1.00  0.00           C  
ATOM    522  O   PRO A  70      21.732  -7.918 -67.341  1.00  0.00           O  
ATOM    523  CB  PRO A  70      23.697 -10.220 -68.597  1.00  0.00           C  
ATOM    524  CG  PRO A  70      24.525 -10.717 -69.732  1.00  0.00           C  
ATOM    525  CD  PRO A  70      25.065  -9.469 -70.377  1.00  0.00           C  
ATOM    526  N   THR A  71      23.724  -7.032 -67.752  1.00  0.00           N  
ATOM    527  CA  THR A  71      23.616  -5.994 -66.692  1.00  0.00           C  
ATOM    528  C   THR A  71      23.121  -4.613 -67.103  1.00  0.00           C  
ATOM    529  O   THR A  71      22.946  -3.600 -66.383  1.00  0.00           O  
ATOM    530  CB  THR A  71      24.980  -5.809 -66.003  1.00  0.00           C  
ATOM    531  CG2 THR A  71      25.454  -7.121 -65.397  1.00  0.00           C  
ATOM    532  OG1 THR A  71      25.944  -5.354 -66.961  1.00  0.00           O  
ATOM    533  N   ASP A  72      22.923  -4.418 -68.396  1.00  0.00           N  
ATOM    534  CA  ASP A  72      22.457  -3.100 -68.993  1.00  0.00           C  
ATOM    535  C   ASP A  72      21.083  -2.718 -68.444  1.00  0.00           C  
ATOM    536  O   ASP A  72      20.872  -1.560 -68.109  1.00  0.00           O  
ATOM    537  CB  ASP A  72      22.382  -3.169 -70.520  1.00  0.00           C  
ATOM    538  CG  ASP A  72      23.751  -3.102 -71.184  1.00  0.00           C  
ATOM    539  OD1 ASP A  72      24.677  -2.657 -70.548  1.00  0.00           O  
ATOM    540  OD2 ASP A  72      23.857  -3.498 -72.320  1.00  0.00           O1-
ATOM    541  N   ILE A  73      20.280  -3.739 -68.160  1.00  0.00           N  
ATOM    542  CA  ILE A  73      18.943  -3.666 -67.565  1.00  0.00           C  
ATOM    543  C   ILE A  73      18.912  -4.268 -66.100  1.00  0.00           C  
ATOM    544  O   ILE A  73      17.866  -4.694 -65.595  1.00  0.00           O  
ATOM    545  CB  ILE A  73      17.930  -4.402 -68.461  1.00  0.00           C  
ATOM    546  CG1 ILE A  73      18.333  -5.869 -68.630  1.00  0.00           C  
ATOM    547  CG2 ILE A  73      17.821  -3.717 -69.815  1.00  0.00           C  
ATOM    548  CD1 ILE A  73      17.276  -6.720 -69.295  1.00  0.00           C  
ATOM    549  N   LYS A  74      20.073  -4.240 -65.487  1.00  0.00           N  
ATOM    550  CA  LYS A  74      20.233  -4.722 -64.090  1.00  0.00           C  
ATOM    551  C   LYS A  74      19.264  -4.020 -63.135  1.00  0.00           C  
ATOM    552  O   LYS A  74      19.217  -2.771 -63.104  1.00  0.00           O  
ATOM    553  CB  LYS A  74      21.670  -4.516 -63.608  1.00  0.00           C  
ATOM    554  CG  LYS A  74      21.950  -5.060 -62.213  1.00  0.00           C  
ATOM    555  CD  LYS A  74      23.408  -4.864 -61.826  1.00  0.00           C  
ATOM    556  CE  LYS A  74      23.690  -5.408 -60.433  1.00  0.00           C  
ATOM    557  NZ  LYS A  74      25.097  -5.165 -60.014  1.00  0.00           N1+
ATOM    558  N   GLY A  75      18.526  -4.842 -62.388  1.00  0.00           N  
ATOM    559  CA  GLY A  75      17.452  -4.330 -61.535  1.00  0.00           C  
ATOM    560  C   GLY A  75      17.688  -4.106 -60.037  1.00  0.00           C  
ATOM    561  O   GLY A  75      18.842  -4.006 -59.781  1.00  0.00           O  
ATOM    562  N   LYS A  76      16.707  -3.928 -59.136  1.00  0.00           N  
ATOM    563  CA  LYS A  76      16.867  -3.716 -57.708  1.00  0.00           C  
ATOM    564  C   LYS A  76      17.329  -5.014 -57.052  1.00  0.00           C  
ATOM    565  O   LYS A  76      18.251  -4.948 -56.259  1.00  0.00           O  
ATOM    566  CB  LYS A  76      15.560  -3.230 -57.079  1.00  0.00           C  
ATOM    567  CG  LYS A  76      15.667  -2.875 -55.602  1.00  0.00           C  
ATOM    568  CD  LYS A  76      14.385  -2.233 -55.093  1.00  0.00           C  
ATOM    569  CE  LYS A  76      14.550  -1.714 -53.672  1.00  0.00           C  
ATOM    570  NZ  LYS A  76      14.727  -2.820 -52.693  1.00  0.00           N1+
ATOM    571  N   TYR A  77      16.814  -6.141 -57.591  1.00  0.00           N  
ATOM    572  CA  TYR A  77      17.000  -7.473 -57.010  1.00  0.00           C  
ATOM    573  C   TYR A  77      17.714  -8.354 -57.998  1.00  0.00           C  
ATOM    574  O   TYR A  77      18.565  -9.155 -57.620  1.00  0.00           O  
ATOM    575  CB  TYR A  77      15.662  -8.097 -56.608  1.00  0.00           C  
ATOM    576  CG  TYR A  77      14.857  -7.251 -55.646  1.00  0.00           C  
ATOM    577  CD1 TYR A  77      13.690  -6.636 -56.073  1.00  0.00           C  
ATOM    578  CD2 TYR A  77      15.287  -7.091 -54.337  1.00  0.00           C  
ATOM    579  CE1 TYR A  77      12.955  -5.863 -55.194  1.00  0.00           C  
ATOM    580  CE2 TYR A  77      14.553  -6.318 -53.459  1.00  0.00           C  
ATOM    581  CZ  TYR A  77      13.391  -5.706 -53.884  1.00  0.00           C  
ATOM    582  OH  TYR A  77      12.659  -4.937 -53.008  1.00  0.00           O  
ATOM    583  N   VAL A  78      17.333  -8.252 -59.315  1.00  0.00           N  
ATOM    584  CA  VAL A  78      17.881  -8.997 -60.459  1.00  0.00           C  
ATOM    585  C   VAL A  78      19.283  -8.453 -60.893  1.00  0.00           C  
ATOM    586  O   VAL A  78      19.504  -7.210 -61.145  1.00  0.00           O  
ATOM    587  CB  VAL A  78      16.904  -8.915 -61.647  1.00  0.00           C  
ATOM    588  CG1 VAL A  78      17.483  -9.625 -62.862  1.00  0.00           C  
ATOM    589  CG2 VAL A  78      15.563  -9.517 -61.258  1.00  0.00           C  
ATOM    590  N   LYS A  79      20.167  -9.423 -61.022  1.00  0.00           N  
ATOM    591  CA  LYS A  79      21.525  -9.214 -61.317  1.00  0.00           C  
ATOM    592  C   LYS A  79      21.779  -9.219 -62.830  1.00  0.00           C  
ATOM    593  O   LYS A  79      22.405  -8.289 -63.388  1.00  0.00           O  
ATOM    594  CB  LYS A  79      22.368 -10.281 -60.616  1.00  0.00           C  
ATOM    595  CG  LYS A  79      23.872 -10.088 -60.756  1.00  0.00           C  
ATOM    596  CD  LYS A  79      24.640 -11.140 -59.970  1.00  0.00           C  
ATOM    597  CE  LYS A  79      26.143 -10.961 -60.126  1.00  0.00           C  
ATOM    598  NZ  LYS A  79      26.907 -11.985 -59.364  1.00  0.00           N1+
ATOM    599  N   GLU A  80      21.406 -10.318 -63.489  1.00  0.00           N  
ATOM    600  CA  GLU A  80      21.683 -10.451 -64.941  1.00  0.00           C  
ATOM    601  C   GLU A  80      20.464 -11.038 -65.699  1.00  0.00           C  
ATOM    602  O   GLU A  80      19.944 -12.046 -65.249  1.00  0.00           O  
ATOM    603  CB  GLU A  80      22.910 -11.336 -65.171  1.00  0.00           C  
ATOM    604  CG  GLU A  80      24.232 -10.692 -64.776  1.00  0.00           C  
ATOM    605  CD  GLU A  80      25.412 -11.595 -65.000  1.00  0.00           C  
ATOM    606  OE1 GLU A  80      25.207 -12.741 -65.320  1.00  0.00           O  
ATOM    607  OE2 GLU A  80      26.521 -11.138 -64.851  1.00  0.00           O1-
ATOM    608  N   VAL A  81      20.165 -10.537 -66.941  1.00  0.00           N  
ATOM    609  CA  VAL A  81      19.164 -11.168 -67.754  1.00  0.00           C  
ATOM    610  C   VAL A  81      19.767 -11.377 -69.158  1.00  0.00           C  
ATOM    611  O   VAL A  81      20.151 -10.389 -69.806  1.00  0.00           O  
ATOM    612  CB  VAL A  81      17.894 -10.300 -67.828  1.00  0.00           C  
ATOM    613  CG1 VAL A  81      16.845 -10.964 -68.709  1.00  0.00           C  
ATOM    614  CG2 VAL A  81      17.349 -10.060 -66.429  1.00  0.00           C  
ATOM    615  N   GLU A  82      19.723 -12.600 -69.648  1.00  0.00           N  
ATOM    616  CA  GLU A  82      20.422 -13.007 -70.899  1.00  0.00           C  
ATOM    617  C   GLU A  82      19.644 -14.191 -71.657  1.00  0.00           C  
ATOM    618  O   GLU A  82      19.104 -15.110 -71.051  1.00  0.00           O  
ATOM    619  CB  GLU A  82      21.854 -13.434 -70.570  1.00  0.00           C  
ATOM    620  CG  GLU A  82      22.707 -13.766 -71.786  1.00  0.00           C  
ATOM    621  CD  GLU A  82      24.113 -14.158 -71.425  1.00  0.00           C  
ATOM    622  OE1 GLU A  82      24.448 -14.096 -70.267  1.00  0.00           O  
ATOM    623  OE2 GLU A  82      24.853 -14.520 -72.310  1.00  0.00           O1-
ATOM    624  N   VAL A  83      19.598 -13.986 -72.993  1.00  0.00           N  
ATOM    625  CA  VAL A  83      19.110 -15.033 -73.938  1.00  0.00           C  
ATOM    626  C   VAL A  83      20.111 -16.177 -74.088  1.00  0.00           C  
ATOM    627  O   VAL A  83      21.310 -15.947 -74.243  1.00  0.00           O  
ATOM    628  CB  VAL A  83      18.843 -14.424 -75.327  1.00  0.00           C  
ATOM    629  CG1 VAL A  83      18.457 -15.511 -76.319  1.00  0.00           C  
ATOM    630  CG2 VAL A  83      17.752 -13.370 -75.230  1.00  0.00           C  
ATOM    631  N   LYS A  84      19.600 -17.395 -73.904  1.00  0.00           N  
ATOM    632  CA  LYS A  84      20.389 -18.607 -74.053  1.00  0.00           C  
ATOM    633  C   LYS A  84      19.701 -19.485 -75.177  1.00  0.00           C  
ATOM    634  O   LYS A  84      18.790 -20.274 -74.836  1.00  0.00           O  
ATOM    635  CB  LYS A  84      20.487 -19.356 -72.723  1.00  0.00           C  
ATOM    636  CG  LYS A  84      21.128 -18.556 -71.597  1.00  0.00           C  
ATOM    637  CD  LYS A  84      22.604 -18.304 -71.867  1.00  0.00           C  
ATOM    638  CE  LYS A  84      23.270 -17.601 -70.694  1.00  0.00           C  
ATOM    639  NZ  LYS A  84      24.710 -17.328 -70.954  1.00  0.00           N1+
ATOM    640  N   ASN A  85      20.121 -19.377 -76.436  1.00  0.00           N  
ATOM    641  CA  ASN A  85      19.649 -20.096 -77.653  1.00  0.00           C  
ATOM    642  C   ASN A  85      18.101 -20.180 -77.974  1.00  0.00           C  
ATOM    643  O   ASN A  85      17.599 -21.222 -78.394  1.00  0.00           O  
ATOM    644  CB  ASN A  85      20.213 -21.504 -77.599  1.00  0.00           C  
ATOM    645  CG  ASN A  85      21.714 -21.528 -77.677  1.00  0.00           C  
ATOM    646  ND2 ASN A  85      22.323 -22.426 -76.946  1.00  0.00           N  
ATOM    647  OD1 ASN A  85      22.323 -20.732 -78.401  1.00  0.00           O  
ATOM    648  N   GLY A  86      17.395 -19.034 -77.703  1.00  0.00           N  
ATOM    649  CA  GLY A  86      15.971 -18.823 -77.750  1.00  0.00           C  
ATOM    650  C   GLY A  86      15.201 -18.837 -76.410  1.00  0.00           C  
ATOM    651  O   GLY A  86      14.017 -18.562 -76.458  1.00  0.00           O  
ATOM    652  N   VAL A  87      15.861 -19.127 -75.244  1.00  0.00           N  
ATOM    653  CA  VAL A  87      15.285 -19.091 -73.897  1.00  0.00           C  
ATOM    654  C   VAL A  87      15.889 -17.967 -73.079  1.00  0.00           C  
ATOM    655  O   VAL A  87      17.087 -17.973 -72.803  1.00  0.00           O  
ATOM    656  CB  VAL A  87      15.520 -20.429 -73.172  1.00  0.00           C  
ATOM    657  CG1 VAL A  87      14.953 -20.378 -71.761  1.00  0.00           C  
ATOM    658  CG2 VAL A  87      14.891 -21.565 -73.965  1.00  0.00           C  
ATOM    659  N   VAL A  88      15.047 -17.025 -72.593  1.00  0.00           N  
ATOM    660  CA  VAL A  88      15.410 -15.819 -71.764  1.00  0.00           C  
ATOM    661  C   VAL A  88      15.524 -16.139 -70.275  1.00  0.00           C  
ATOM    662  O   VAL A  88      14.599 -16.540 -69.674  1.00  0.00           O  
ATOM    663  CB  VAL A  88      14.359 -14.706 -71.938  1.00  0.00           C  
ATOM    664  CG1 VAL A  88      14.706 -13.505 -71.070  1.00  0.00           C  
ATOM    665  CG2 VAL A  88      14.268 -14.305 -73.402  1.00  0.00           C  
ATOM    666  N   THR A  89      16.725 -16.110 -69.749  1.00  0.00           N  
ATOM    667  CA  THR A  89      17.052 -16.454 -68.395  1.00  0.00           C  
ATOM    668  C   THR A  89      17.220 -15.212 -67.585  1.00  0.00           C  
ATOM    669  O   THR A  89      17.618 -14.154 -68.117  1.00  0.00           O  
ATOM    670  CB  THR A  89      18.332 -17.307 -68.321  1.00  0.00           C  
ATOM    671  CG2 THR A  89      18.190 -18.558 -69.173  1.00  0.00           C  
ATOM    672  OG1 THR A  89      19.448 -16.538 -68.789  1.00  0.00           O  
ATOM    673  N   ALA A  90      17.080 -15.286 -66.257  1.00  0.00           N  
ATOM    674  CA  ALA A  90      17.214 -14.223 -65.283  1.00  0.00           C  
ATOM    675  C   ALA A  90      17.874 -14.745 -63.985  1.00  0.00           C  
ATOM    676  O   ALA A  90      17.428 -15.709 -63.427  1.00  0.00           O  
ATOM    677  CB  ALA A  90      15.813 -13.501 -65.174  1.00  0.00           C  
ATOM    678  N   THR A  91      18.984 -14.131 -63.571  1.00  0.00           N  
ATOM    679  CA  THR A  91      19.716 -14.503 -62.316  1.00  0.00           C  
ATOM    680  C   THR A  91      19.610 -13.329 -61.229  1.00  0.00           C  
ATOM    681  O   THR A  91      19.944 -12.141 -61.522  1.00  0.00           O  
ATOM    682  CB  THR A  91      21.193 -14.818 -62.618  1.00  0.00           C  
ATOM    683  CG2 THR A  91      21.939 -15.159 -61.337  1.00  0.00           C  
ATOM    684  OG1 THR A  91      21.272 -15.927 -63.523  1.00  0.00           O  
ATOM    685  N   MET A  92      19.347 -13.646 -59.972  1.00  0.00           N  
ATOM    686  CA  MET A  92      19.214 -12.695 -58.837  1.00  0.00           C  
ATOM    687  C   MET A  92      20.561 -12.271 -58.097  1.00  0.00           C  
ATOM    688  O   MET A  92      21.601 -12.840 -58.207  1.00  0.00           O  
ATOM    689  CB  MET A  92      18.240 -13.301 -57.829  1.00  0.00           C  
ATOM    690  CG  MET A  92      16.910 -13.742 -58.424  1.00  0.00           C  
ATOM    691  SD  MET A  92      16.016 -12.385 -59.208  1.00  0.00           S  
ATOM    692  CE  MET A  92      15.537 -11.423 -57.776  1.00  0.00           C  
ATOM    693  N   LEU A  93      20.623 -11.120 -57.374  1.00  0.00           N  
ATOM    694  CA  LEU A  93      21.765 -10.689 -56.556  1.00  0.00           C  
ATOM    695  C   LEU A  93      21.992 -11.651 -55.342  1.00  0.00           C  
ATOM    696  O   LEU A  93      21.050 -12.257 -54.761  1.00  0.00           O  
ATOM    697  CB  LEU A  93      21.535  -9.256 -56.058  1.00  0.00           C  
ATOM    698  CG  LEU A  93      21.549  -8.166 -57.138  1.00  0.00           C  
ATOM    699  CD1 LEU A  93      21.089  -6.846 -56.533  1.00  0.00           C  
ATOM    700  CD2 LEU A  93      22.950  -8.044 -57.718  1.00  0.00           C  
ATOM    701  N   SER A  94      23.247 -11.839 -54.991  1.00  0.00           N  
ATOM    702  CA  SER A  94      23.648 -12.746 -53.851  1.00  0.00           C  
ATOM    703  C   SER A  94      23.348 -12.272 -52.459  1.00  0.00           C  
ATOM    704  O   SER A  94      23.504 -13.030 -51.469  1.00  0.00           O  
ATOM    705  CB  SER A  94      25.138 -13.021 -53.915  1.00  0.00           C  
ATOM    706  OG  SER A  94      25.874 -11.856 -53.662  1.00  0.00           O  
ATOM    707  N   SER A  95      22.933 -11.048 -52.278  1.00  0.00           N  
ATOM    708  CA  SER A  95      22.569 -10.390 -51.040  1.00  0.00           C  
ATOM    709  C   SER A  95      21.309  -9.515 -50.946  1.00  0.00           C  
ATOM    710  O   SER A  95      21.059  -8.767 -51.852  1.00  0.00           O  
ATOM    711  CB  SER A  95      23.755  -9.538 -50.630  1.00  0.00           C  
ATOM    712  OG  SER A  95      23.472  -8.809 -49.468  1.00  0.00           O  
ATOM    713  N   GLY A  96      20.386  -9.845 -50.000  1.00  0.00           N  
ATOM    714  CA  GLY A  96      19.074  -9.193 -49.753  1.00  0.00           C  
ATOM    715  C   GLY A  96      17.887  -9.814 -50.488  1.00  0.00           C  
ATOM    716  O   GLY A  96      16.783  -9.526 -50.114  1.00  0.00           O  
ATOM    717  N   VAL A  97      18.107 -10.620 -51.483  1.00  0.00           N  
ATOM    718  CA  VAL A  97      17.003 -11.229 -52.259  1.00  0.00           C  
ATOM    719  C   VAL A  97      16.433 -12.418 -51.436  1.00  0.00           C  
ATOM    720  O   VAL A  97      16.872 -13.530 -51.736  1.00  0.00           O  
ATOM    721  CB  VAL A  97      17.499 -11.719 -53.632  1.00  0.00           C  
ATOM    722  CG1 VAL A  97      16.354 -12.337 -54.421  1.00  0.00           C  
ATOM    723  CG2 VAL A  97      18.123 -10.565 -54.400  1.00  0.00           C  
ATOM    724  N   ASN A  98      15.626 -12.107 -50.400  1.00  0.00           N  
ATOM    725  CA  ASN A  98      14.896 -12.934 -49.543  1.00  0.00           C  
ATOM    726  C   ASN A  98      15.817 -13.501 -48.437  1.00  0.00           C  
ATOM    727  O   ASN A  98      16.390 -12.782 -47.612  1.00  0.00           O  
ATOM    728  CB  ASN A  98      14.223 -14.031 -50.347  1.00  0.00           C  
ATOM    729  CG  ASN A  98      13.294 -14.871 -49.514  1.00  0.00           C  
ATOM    730  ND2 ASN A  98      12.094 -14.389 -49.312  1.00  0.00           N  
ATOM    731  OD1 ASN A  98      13.664 -15.957 -49.053  1.00  0.00           O  
ATOM    732  N   ASN A  99      16.037 -14.805 -48.475  1.00  0.00           N  
ATOM    733  CA  ASN A  99      16.728 -15.762 -47.558  1.00  0.00           C  
ATOM    734  C   ASN A  99      17.105 -17.117 -48.253  1.00  0.00           C  
ATOM    735  O   ASN A  99      18.279 -17.491 -48.162  1.00  0.00           O  
ATOM    736  CB  ASN A  99      15.866 -16.020 -46.336  1.00  0.00           C  
ATOM    737  CG  ASN A  99      16.548 -16.897 -45.323  1.00  0.00           C  
ATOM    738  ND2 ASN A  99      15.929 -18.002 -44.995  1.00  0.00           N  
ATOM    739  OD1 ASN A  99      17.638 -16.573 -44.836  1.00  0.00           O  
ATOM    740  N   GLU A 100      16.106 -17.817 -48.867  1.00  0.00           N  
ATOM    741  CA  GLU A 100      16.245 -19.099 -49.594  1.00  0.00           C  
ATOM    742  C   GLU A 100      16.612 -18.979 -51.043  1.00  0.00           C  
ATOM    743  O   GLU A 100      17.237 -19.877 -51.634  1.00  0.00           O  
ATOM    744  CB  GLU A 100      14.943 -19.896 -49.500  1.00  0.00           C  
ATOM    745  CG  GLU A 100      14.626 -20.419 -48.106  1.00  0.00           C  
ATOM    746  CD  GLU A 100      13.342 -21.200 -48.052  1.00  0.00           C  
ATOM    747  OE1 GLU A 100      12.326 -20.663 -48.421  1.00  0.00           O  
ATOM    748  OE2 GLU A 100      13.378 -22.336 -47.641  1.00  0.00           O1-
ATOM    749  N   ILE A 101      16.318 -17.829 -51.709  1.00  0.00           N  
ATOM    750  CA  ILE A 101      16.544 -17.605 -53.186  1.00  0.00           C  
ATOM    751  C   ILE A 101      17.642 -16.511 -53.477  1.00  0.00           C  
ATOM    752  O   ILE A 101      17.714 -16.053 -54.598  1.00  0.00           O  
ATOM    753  CB  ILE A 101      15.229 -17.196 -53.876  1.00  0.00           C  
ATOM    754  CG1 ILE A 101      14.683 -15.906 -53.259  1.00  0.00           C  
ATOM    755  CG2 ILE A 101      14.204 -18.314 -53.773  1.00  0.00           C  
ATOM    756  CD1 ILE A 101      13.531 -15.301 -54.029  1.00  0.00           C  
ATOM    757  N   LYS A 102      18.554 -16.172 -52.589  1.00  0.00           N  
ATOM    758  CA  LYS A 102      19.643 -15.237 -52.907  1.00  0.00           C  
ATOM    759  C   LYS A 102      20.582 -15.777 -53.954  1.00  0.00           C  
ATOM    760  O   LYS A 102      20.996 -16.881 -53.848  1.00  0.00           O  
ATOM    761  CB  LYS A 102      20.436 -14.888 -51.646  1.00  0.00           C  
ATOM    762  CG  LYS A 102      19.656 -14.087 -50.613  1.00  0.00           C  
ATOM    763  CD  LYS A 102      20.508 -13.783 -49.390  1.00  0.00           C  
ATOM    764  CE  LYS A 102      19.709 -13.044 -48.327  1.00  0.00           C  
ATOM    765  NZ  LYS A 102      20.518 -12.780 -47.106  1.00  0.00           N1+
ATOM    766  N   GLY A 103      20.851 -15.048 -55.066  1.00  0.00           N  
ATOM    767  CA  GLY A 103      21.706 -15.512 -56.153  1.00  0.00           C  
ATOM    768  C   GLY A 103      21.175 -16.547 -57.094  1.00  0.00           C  
ATOM    769  O   GLY A 103      21.903 -16.988 -57.972  1.00  0.00           O  
ATOM    770  N   LYS A 104      19.868 -16.887 -57.035  1.00  0.00           N  
ATOM    771  CA  LYS A 104      19.222 -17.920 -57.815  1.00  0.00           C  
ATOM    772  C   LYS A 104      18.601 -17.458 -59.211  1.00  0.00           C  
ATOM    773  O   LYS A 104      18.577 -16.260 -59.519  1.00  0.00           O  
ATOM    774  CB  LYS A 104      18.142 -18.558 -56.940  1.00  0.00           C  
ATOM    775  CG  LYS A 104      18.643 -19.076 -55.599  1.00  0.00           C  
ATOM    776  CD  LYS A 104      19.704 -20.151 -55.783  1.00  0.00           C  
ATOM    777  CE  LYS A 104      20.176 -20.700 -54.445  1.00  0.00           C  
ATOM    778  NZ  LYS A 104      21.322 -21.636 -54.599  1.00  0.00           N1+
ATOM    779  N   LYS A 105      18.107 -18.432 -60.050  1.00  0.00           N  
ATOM    780  CA  LYS A 105      17.643 -18.185 -61.435  1.00  0.00           C  
ATOM    781  C   LYS A 105      16.316 -18.850 -61.822  1.00  0.00           C  
ATOM    782  O   LYS A 105      15.749 -19.736 -61.138  1.00  0.00           O  
ATOM    783  CB  LYS A 105      18.722 -18.633 -62.421  1.00  0.00           C  
ATOM    784  CG  LYS A 105      19.119 -20.098 -62.296  1.00  0.00           C  
ATOM    785  CD  LYS A 105      20.272 -20.440 -63.227  1.00  0.00           C  
ATOM    786  CE  LYS A 105      20.725 -21.881 -63.043  1.00  0.00           C  
ATOM    787  NZ  LYS A 105      21.919 -22.200 -63.873  1.00  0.00           N1+
ATOM    788  N   LEU A 106      15.661 -18.283 -62.863  1.00  0.00           N  
ATOM    789  CA  LEU A 106      14.426 -18.619 -63.606  1.00  0.00           C  
ATOM    790  C   LEU A 106      14.713 -18.520 -65.143  1.00  0.00           C  
ATOM    791  O   LEU A 106      15.781 -17.931 -65.507  1.00  0.00           O  
ATOM    792  CB  LEU A 106      13.284 -17.674 -63.210  1.00  0.00           C  
ATOM    793  CG  LEU A 106      12.873 -17.710 -61.733  1.00  0.00           C  
ATOM    794  CD1 LEU A 106      11.892 -16.581 -61.450  1.00  0.00           C  
ATOM    795  CD2 LEU A 106      12.257 -19.064 -61.410  1.00  0.00           C  
ATOM    796  N   SER A 107      13.790 -18.946 -66.036  1.00  0.00           N  
ATOM    797  CA  SER A 107      13.814 -18.866 -67.525  1.00  0.00           C  
ATOM    798  C   SER A 107      12.390 -18.707 -68.108  1.00  0.00           C  
ATOM    799  O   SER A 107      11.348 -18.926 -67.427  1.00  0.00           O  
ATOM    800  CB  SER A 107      14.466 -20.105 -68.106  1.00  0.00           C  
ATOM    801  OG  SER A 107      13.613 -21.213 -68.011  1.00  0.00           O  
ATOM    802  N   LEU A 108      12.379 -18.244 -69.368  1.00  0.00           N  
ATOM    803  CA  LEU A 108      11.281 -17.895 -70.243  1.00  0.00           C  
ATOM    804  C   LEU A 108      11.529 -18.508 -71.642  1.00  0.00           C  
ATOM    805  O   LEU A 108      12.491 -18.131 -72.346  1.00  0.00           O  
ATOM    806  CB  LEU A 108      11.142 -16.370 -70.337  1.00  0.00           C  
ATOM    807  CG  LEU A 108      10.179 -15.855 -71.415  1.00  0.00           C  
ATOM    808  CD1 LEU A 108       8.762 -16.304 -71.087  1.00  0.00           C  
ATOM    809  CD2 LEU A 108      10.268 -14.339 -71.493  1.00  0.00           C  
ATOM    810  N   TRP A 109      10.525 -19.285 -72.100  1.00  0.00           N  
ATOM    811  CA  TRP A 109      10.622 -20.050 -73.364  1.00  0.00           C  
ATOM    812  C   TRP A 109       9.271 -20.091 -74.072  1.00  0.00           C  
ATOM    813  O   TRP A 109       8.283 -19.509 -73.625  1.00  0.00           O  
ATOM    814  CB  TRP A 109      11.103 -21.478 -73.100  1.00  0.00           C  
ATOM    815  CG  TRP A 109      10.155 -22.285 -72.267  1.00  0.00           C  
ATOM    816  CD1 TRP A 109       9.220 -23.167 -72.719  1.00  0.00           C  
ATOM    817  CD2 TRP A 109      10.044 -22.289 -70.823  1.00  0.00           C  
ATOM    818  CE2 TRP A 109       9.029 -23.192 -70.494  1.00  0.00           C  
ATOM    819  CE3 TRP A 109      10.716 -21.610 -69.799  1.00  0.00           C  
ATOM    820  NE1 TRP A 109       8.537 -23.716 -71.662  1.00  0.00           N  
ATOM    821  CZ2 TRP A 109       8.662 -23.436 -69.180  1.00  0.00           C  
ATOM    822  CZ3 TRP A 109      10.349 -21.857 -68.481  1.00  0.00           C  
ATOM    823  CH2 TRP A 109       9.349 -22.747 -68.181  1.00  0.00           C  
ATOM    824  N   ALA A 110       9.243 -20.801 -75.218  1.00  0.00           N  
ATOM    825  CA  ALA A 110       8.101 -20.777 -76.094  1.00  0.00           C  
ATOM    826  C   ALA A 110       8.028 -21.912 -77.138  1.00  0.00           C  
ATOM    827  O   ALA A 110       8.978 -22.681 -77.270  1.00  0.00           O  
ATOM    828  CB  ALA A 110       8.054 -19.358 -76.826  1.00  0.00           C  
ATOM    829  N   ARG A 111       6.865 -22.048 -77.820  1.00  0.00           N  
ATOM    830  CA  ARG A 111       6.576 -22.946 -78.913  1.00  0.00           C  
ATOM    831  C   ARG A 111       6.265 -22.055 -80.191  1.00  0.00           C  
ATOM    832  O   ARG A 111       5.890 -20.871 -80.056  1.00  0.00           O  
ATOM    833  CB  ARG A 111       5.400 -23.848 -78.567  1.00  0.00           C  
ATOM    834  CG  ARG A 111       5.582 -24.681 -77.308  1.00  0.00           C  
ATOM    835  CD  ARG A 111       6.396 -25.896 -77.566  1.00  0.00           C  
ATOM    836  NE  ARG A 111       6.511 -26.734 -76.383  1.00  0.00           N  
ATOM    837  CZ  ARG A 111       7.215 -27.881 -76.323  1.00  0.00           C  
ATOM    838  NH1 ARG A 111       7.859 -28.313 -77.384  1.00  0.00           N1+
ATOM    839  NH2 ARG A 111       7.257 -28.572 -75.197  1.00  0.00           N  
ATOM    840  N   ARG A 112       6.568 -22.631 -81.312  1.00  0.00           N  
ATOM    841  CA  ARG A 112       6.393 -22.078 -82.690  1.00  0.00           C  
ATOM    842  C   ARG A 112       4.934 -22.141 -83.159  1.00  0.00           C  
ATOM    843  O   ARG A 112       4.513 -23.277 -83.313  1.00  0.00           O  
ATOM    844  CB  ARG A 112       7.258 -22.835 -83.688  1.00  0.00           C  
ATOM    845  CG  ARG A 112       7.325 -22.216 -85.075  1.00  0.00           C  
ATOM    846  CD  ARG A 112       8.035 -23.098 -86.036  1.00  0.00           C  
ATOM    847  NE  ARG A 112       8.254 -22.441 -87.315  1.00  0.00           N  
ATOM    848  CZ  ARG A 112       9.420 -21.884 -87.698  1.00  0.00           C  
ATOM    849  NH1 ARG A 112      10.458 -21.912 -86.893  1.00  0.00           N1+
ATOM    850  NH2 ARG A 112       9.518 -21.309 -88.884  1.00  0.00           N  
ATOM    851  N   GLU A 113       4.307 -21.023 -83.400  1.00  0.00           N  
ATOM    852  CA  GLU A 113       2.842 -20.998 -83.855  1.00  0.00           C  
ATOM    853  C   GLU A 113       2.754 -20.727 -85.369  1.00  0.00           C  
ATOM    854  O   GLU A 113       1.689 -20.744 -85.944  1.00  0.00           O  
ATOM    855  CB  GLU A 113       2.040 -19.930 -83.107  1.00  0.00           C  
ATOM    856  CG  GLU A 113       1.963 -20.141 -81.601  1.00  0.00           C  
ATOM    857  CD  GLU A 113       1.230 -21.398 -81.224  1.00  0.00           C  
ATOM    858  OE1 GLU A 113       0.255 -21.710 -81.865  1.00  0.00           O  
ATOM    859  OE2 GLU A 113       1.644 -22.047 -80.292  1.00  0.00           O1-
ATOM    860  N   ASN A 114       3.858 -20.596 -86.095  1.00  0.00           N  
ATOM    861  CA  ASN A 114       3.939 -20.278 -87.583  1.00  0.00           C  
ATOM    862  C   ASN A 114       3.131 -19.052 -88.039  1.00  0.00           C  
ATOM    863  O   ASN A 114       2.248 -19.219 -88.840  1.00  0.00           O  
ATOM    864  CB  ASN A 114       3.501 -21.479 -88.402  1.00  0.00           C  
ATOM    865  CG  ASN A 114       4.480 -22.618 -88.325  1.00  0.00           C  
ATOM    866  ND2 ASN A 114       3.972 -23.823 -88.292  1.00  0.00           N  
ATOM    867  OD1 ASN A 114       5.698 -22.405 -88.297  1.00  0.00           O  
ATOM    868  N   GLY A 115       3.320 -17.962 -87.290  1.00  0.00           N  
ATOM    869  CA  GLY A 115       2.629 -16.724 -87.457  1.00  0.00           C  
ATOM    870  C   GLY A 115       2.959 -15.810 -86.290  1.00  0.00           C  
ATOM    871  O   GLY A 115       3.212 -14.644 -86.403  1.00  0.00           O  
ATOM    872  N   SER A 116       3.113 -16.341 -85.009  1.00  0.00           N  
ATOM    873  CA  SER A 116       3.496 -15.716 -83.759  1.00  0.00           C  
ATOM    874  C   SER A 116       4.189 -16.777 -82.928  1.00  0.00           C  
ATOM    875  O   SER A 116       4.627 -17.827 -83.419  1.00  0.00           O  
ATOM    876  CB  SER A 116       2.289 -15.160 -83.029  1.00  0.00           C  
ATOM    877  OG  SER A 116       2.680 -14.404 -81.915  1.00  0.00           O  
ATOM    878  N   VAL A 117       4.479 -16.435 -81.663  1.00  0.00           N  
ATOM    879  CA  VAL A 117       5.193 -17.328 -80.735  1.00  0.00           C  
ATOM    880  C   VAL A 117       4.489 -17.386 -79.308  1.00  0.00           C  
ATOM    881  O   VAL A 117       4.257 -16.347 -78.743  1.00  0.00           O  
ATOM    882  CB  VAL A 117       6.649 -16.849 -80.585  1.00  0.00           C  
ATOM    883  CG1 VAL A 117       7.382 -17.689 -79.550  1.00  0.00           C  
ATOM    884  CG2 VAL A 117       7.356 -16.913 -81.930  1.00  0.00           C  
ATOM    885  N   LYS A 118       4.286 -18.593 -78.792  1.00  0.00           N  
ATOM    886  CA  LYS A 118       3.543 -18.901 -77.556  1.00  0.00           C  
ATOM    887  C   LYS A 118       4.496 -19.020 -76.366  1.00  0.00           C  
ATOM    888  O   LYS A 118       5.194 -20.051 -76.298  1.00  0.00           O  
ATOM    889  CB  LYS A 118       2.737 -20.191 -77.713  1.00  0.00           C  
ATOM    890  CG  LYS A 118       1.827 -20.512 -76.535  1.00  0.00           C  
ATOM    891  CD  LYS A 118       1.023 -21.778 -76.787  1.00  0.00           C  
ATOM    892  CE  LYS A 118       0.030 -22.038 -75.664  1.00  0.00           C  
ATOM    893  NZ  LYS A 118      -0.754 -23.282 -75.890  1.00  0.00           N1+
ATOM    894  N   TRP A 119       4.547 -17.978 -75.531  1.00  0.00           N  
ATOM    895  CA  TRP A 119       5.539 -17.949 -74.411  1.00  0.00           C  
ATOM    896  C   TRP A 119       5.110 -18.494 -73.028  1.00  0.00           C  
ATOM    897  O   TRP A 119       3.912 -18.416 -72.713  1.00  0.00           O  
ATOM    898  CB  TRP A 119       6.007 -16.506 -74.213  1.00  0.00           C  
ATOM    899  CG  TRP A 119       6.858 -15.993 -75.335  1.00  0.00           C  
ATOM    900  CD1 TRP A 119       6.431 -15.316 -76.438  1.00  0.00           C  
ATOM    901  CD2 TRP A 119       8.295 -16.114 -75.469  1.00  0.00           C  
ATOM    902  CE2 TRP A 119       8.646 -15.488 -76.668  1.00  0.00           C  
ATOM    903  CE3 TRP A 119       9.296 -16.693 -74.679  1.00  0.00           C  
ATOM    904  NE1 TRP A 119       7.498 -15.009 -77.246  1.00  0.00           N  
ATOM    905  CZ2 TRP A 119       9.960 -15.424 -77.104  1.00  0.00           C  
ATOM    906  CZ3 TRP A 119      10.613 -16.627 -75.115  1.00  0.00           C  
ATOM    907  CH2 TRP A 119      10.936 -16.008 -76.297  1.00  0.00           C  
ATOM    908  N   PHE A 120       6.038 -19.107 -72.305  1.00  0.00           N  
ATOM    909  CA  PHE A 120       5.803 -19.744 -70.953  1.00  0.00           C  
ATOM    910  C   PHE A 120       6.773 -19.291 -69.831  1.00  0.00           C  
ATOM    911  O   PHE A 120       7.956 -19.159 -70.063  1.00  0.00           O  
ATOM    912  CB  PHE A 120       5.893 -21.266 -71.077  1.00  0.00           C  
ATOM    913  CG  PHE A 120       4.966 -21.846 -72.107  1.00  0.00           C  
ATOM    914  CD1 PHE A 120       5.399 -22.064 -73.407  1.00  0.00           C  
ATOM    915  CD2 PHE A 120       3.660 -22.175 -71.778  1.00  0.00           C  
ATOM    916  CE1 PHE A 120       4.546 -22.598 -74.355  1.00  0.00           C  
ATOM    917  CE2 PHE A 120       2.806 -22.710 -72.724  1.00  0.00           C  
ATOM    918  CZ  PHE A 120       3.250 -22.921 -74.014  1.00  0.00           C  
ATOM    919  N   CYS A 121       6.330 -19.043 -68.640  1.00  0.00           N  
ATOM    920  CA  CYS A 121       7.102 -18.391 -67.514  1.00  0.00           C  
ATOM    921  C   CYS A 121       7.342 -19.355 -66.328  1.00  0.00           C  
ATOM    922  O   CYS A 121       6.373 -19.734 -65.700  1.00  0.00           O  
ATOM    923  CB  CYS A 121       6.363 -17.158 -66.994  1.00  0.00           C  
ATOM    924  SG  CYS A 121       6.150 -15.851 -68.226  1.00  0.00           S  
ATOM    925  N   GLY A 122       8.580 -19.845 -65.989  1.00  0.00           N  
ATOM    926  CA  GLY A 122       8.849 -20.753 -64.917  1.00  0.00           C  
ATOM    927  C   GLY A 122      10.301 -20.931 -64.520  1.00  0.00           C  
ATOM    928  O   GLY A 122      11.107 -19.977 -64.440  1.00  0.00           O  
ATOM    929  N   GLN A 123      10.671 -22.147 -64.236  1.00  0.00           N  
ATOM    930  CA  GLN A 123      11.993 -22.491 -63.736  1.00  0.00           C  
ATOM    931  C   GLN A 123      13.012 -22.545 -64.923  1.00  0.00           C  
ATOM    932  O   GLN A 123      12.599 -22.606 -66.075  1.00  0.00           O  
ATOM    933  CB  GLN A 123      11.948 -23.828 -62.992  1.00  0.00           C  
ATOM    934  CG  GLN A 123      11.169 -23.789 -61.688  1.00  0.00           C  
ATOM    935  CD  GLN A 123      11.243 -25.101 -60.930  1.00  0.00           C  
ATOM    936  NE2 GLN A 123      11.701 -25.039 -59.685  1.00  0.00           N  
ATOM    937  OE1 GLN A 123      10.893 -26.160 -61.459  1.00  0.00           O  
ATOM    938  N   PRO A 124      14.276 -22.624 -64.617  1.00  0.00           N  
ATOM    939  CA  PRO A 124      15.353 -22.687 -65.648  1.00  0.00           C  
ATOM    940  C   PRO A 124      15.269 -23.868 -66.591  1.00  0.00           C  
ATOM    941  O   PRO A 124      15.412 -24.991 -66.129  1.00  0.00           O  
ATOM    942  CB  PRO A 124      16.625 -22.773 -64.799  1.00  0.00           C  
ATOM    943  CG  PRO A 124      16.269 -22.070 -63.534  1.00  0.00           C  
ATOM    944  CD  PRO A 124      14.847 -22.484 -63.263  1.00  0.00           C  
ATOM    945  N   VAL A 125      15.119 -23.630 -67.905  1.00  0.00           N  
ATOM    946  CA  VAL A 125      15.317 -24.609 -68.927  1.00  0.00           C  
ATOM    947  C   VAL A 125      16.287 -24.175 -70.022  1.00  0.00           C  
ATOM    948  O   VAL A 125      16.628 -22.978 -70.157  1.00  0.00           O  
ATOM    949  CB  VAL A 125      13.957 -24.952 -69.563  1.00  0.00           C  
ATOM    950  CG1 VAL A 125      12.991 -25.469 -68.508  1.00  0.00           C  
ATOM    951  CG2 VAL A 125      13.388 -23.726 -70.261  1.00  0.00           C  
ATOM    952  N   THR A 126      16.734 -25.100 -70.834  1.00  0.00           N  
ATOM    953  CA  THR A 126      17.582 -25.000 -71.976  1.00  0.00           C  
ATOM    954  C   THR A 126      16.776 -25.409 -73.327  1.00  0.00           C  
ATOM    955  O   THR A 126      15.874 -26.198 -73.225  1.00  0.00           O  
ATOM    956  CB  THR A 126      18.826 -25.883 -71.765  1.00  0.00           C  
ATOM    957  CG2 THR A 126      19.605 -25.425 -70.542  1.00  0.00           C  
ATOM    958  OG1 THR A 126      18.423 -27.247 -71.588  1.00  0.00           O  
ATOM    959  N   ARG A 127      17.193 -24.813 -74.505  1.00  0.00           N  
ATOM    960  CA  ARG A 127      16.507 -25.104 -75.795  1.00  0.00           C  
ATOM    961  C   ARG A 127      17.067 -26.295 -76.575  1.00  0.00           C  
ATOM    962  O   ARG A 127      18.109 -26.203 -77.157  1.00  0.00           O  
ATOM    963  CB  ARG A 127      16.566 -23.882 -76.700  1.00  0.00           C  
ATOM    964  CG  ARG A 127      15.776 -24.004 -77.993  1.00  0.00           C  
ATOM    965  CD  ARG A 127      14.313 -23.913 -77.753  1.00  0.00           C  
ATOM    966  NE  ARG A 127      13.907 -22.567 -77.381  1.00  0.00           N  
ATOM    967  CZ  ARG A 127      12.638 -22.191 -77.132  1.00  0.00           C  
ATOM    968  NH1 ARG A 127      11.664 -23.070 -77.218  1.00  0.00           N1+
ATOM    969  NH2 ARG A 127      12.372 -20.940 -76.800  1.00  0.00           N  
ATOM    970  N   THR A 128      16.364 -27.376 -76.664  1.00  0.00           N  
ATOM    971  CA  THR A 128      16.845 -28.557 -77.394  1.00  0.00           C  
ATOM    972  C   THR A 128      16.744 -28.507 -78.870  1.00  0.00           C  
ATOM    973  O   THR A 128      17.692 -28.753 -79.612  1.00  0.00           O  
ATOM    974  CB  THR A 128      16.100 -29.821 -76.927  1.00  0.00           C  
ATOM    975  CG2 THR A 128      16.572 -31.038 -77.707  1.00  0.00           C  
ATOM    976  OG1 THR A 128      16.342 -30.031 -75.529  1.00  0.00           O  
ATOM    977  N   ASP A 129      15.544 -28.076 -79.321  1.00  0.00           N  
ATOM    978  CA  ASP A 129      15.281 -27.885 -80.765  1.00  0.00           C  
ATOM    979  C   ASP A 129      14.307 -26.675 -81.023  1.00  0.00           C  
ATOM    980  O   ASP A 129      13.950 -25.875 -80.138  1.00  0.00           O  
ATOM    981  CB  ASP A 129      14.695 -29.166 -81.364  1.00  0.00           C  
ATOM    982  CG  ASP A 129      13.326 -29.514 -80.794  1.00  0.00           C  
ATOM    983  OD1 ASP A 129      12.584 -28.611 -80.488  1.00  0.00           O  
ATOM    984  OD2 ASP A 129      13.036 -30.680 -80.670  1.00  0.00           O1-
ATOM    985  N   ASP A 130      13.808 -26.559 -82.283  1.00  0.00           N  
ATOM    986  CA  ASP A 130      12.929 -25.480 -82.738  1.00  0.00           C  
ATOM    987  C   ASP A 130      11.644 -25.245 -81.862  1.00  0.00           C  
ATOM    988  O   ASP A 130      11.132 -24.132 -81.924  1.00  0.00           O  
ATOM    989  CB  ASP A 130      12.513 -25.765 -84.183  1.00  0.00           C  
ATOM    990  CG  ASP A 130      13.653 -25.581 -85.176  1.00  0.00           C  
ATOM    991  OD1 ASP A 130      14.678 -25.074 -84.786  1.00  0.00           O  
ATOM    992  OD2 ASP A 130      13.488 -25.949 -86.314  1.00  0.00           O1-
ATOM    993  N   ASP A 131      11.173 -26.212 -81.054  1.00  0.00           N  
ATOM    994  CA  ASP A 131      10.028 -26.079 -80.150  1.00  0.00           C  
ATOM    995  C   ASP A 131      10.277 -26.550 -78.683  1.00  0.00           C  
ATOM    996  O   ASP A 131       9.805 -25.921 -77.724  1.00  0.00           O  
ATOM    997  CB  ASP A 131       8.845 -26.855 -80.734  1.00  0.00           C  
ATOM    998  CG  ASP A 131       8.277 -26.212 -81.992  1.00  0.00           C  
ATOM    999  OD1 ASP A 131       7.819 -25.097 -81.911  1.00  0.00           O  
ATOM   1000  OD2 ASP A 131       8.307 -26.843 -83.022  1.00  0.00           O1-
ATOM   1001  N   THR A 132      11.089 -27.577 -78.486  1.00  0.00           N  
ATOM   1002  CA  THR A 132      11.326 -28.250 -77.161  1.00  0.00           C  
ATOM   1003  C   THR A 132      12.493 -27.815 -76.305  1.00  0.00           C  
ATOM   1004  O   THR A 132      13.617 -27.804 -76.788  1.00  0.00           O  
ATOM   1005  CB  THR A 132      11.482 -29.768 -77.368  1.00  0.00           C  
ATOM   1006  CG2 THR A 132      11.813 -30.455 -76.052  1.00  0.00           C  
ATOM   1007  OG1 THR A 132      10.261 -30.309 -77.891  1.00  0.00           O  
ATOM   1008  N   VAL A 133      12.344 -27.696 -75.091  1.00  0.00           N  
ATOM   1009  CA  VAL A 133      13.278 -27.404 -74.000  1.00  0.00           C  
ATOM   1010  C   VAL A 133      13.557 -28.505 -72.863  1.00  0.00           C  
ATOM   1011  O   VAL A 133      12.713 -29.370 -72.725  1.00  0.00           O  
ATOM   1012  CB  VAL A 133      12.766 -26.120 -73.319  1.00  0.00           C  
ATOM   1013  CG1 VAL A 133      12.750 -24.964 -74.308  1.00  0.00           C  
ATOM   1014  CG2 VAL A 133      11.378 -26.357 -72.744  1.00  0.00           C  
ATOM   1015  N   ALA A 134      14.553 -28.403 -71.981  1.00  0.00           N  
ATOM   1016  CA  ALA A 134      14.863 -29.389 -70.959  1.00  0.00           C  
ATOM   1017  C   ALA A 134      15.187 -28.701 -69.595  1.00  0.00           C  
ATOM   1018  O   ALA A 134      15.684 -27.512 -69.555  1.00  0.00           O  
ATOM   1019  CB  ALA A 134      15.971 -30.325 -71.413  1.00  0.00           C  
ATOM   1020  N   ASP A 135      14.857 -29.478 -68.534  1.00  0.00           N  
ATOM   1021  CA  ASP A 135      15.018 -28.935 -67.153  1.00  0.00           C  
ATOM   1022  C   ASP A 135      16.482 -28.653 -66.620  1.00  0.00           C  
ATOM   1023  O   ASP A 135      17.092 -29.610 -66.163  1.00  0.00           O  
ATOM   1024  CB  ASP A 135      14.330 -29.899 -66.183  1.00  0.00           C  
ATOM   1025  CG  ASP A 135      14.342 -29.400 -64.745  1.00  0.00           C  
ATOM   1026  OD1 ASP A 135      15.056 -28.466 -64.466  1.00  0.00           O  
ATOM   1027  OD2 ASP A 135      13.637 -29.957 -63.938  1.00  0.00           O1-
ATOM   1028  N   ALA A 136      16.928 -27.386 -66.543  1.00  0.00           N  
ATOM   1029  CA  ALA A 136      18.306 -27.013 -66.140  1.00  0.00           C  
ATOM   1030  C   ALA A 136      18.499 -26.924 -64.612  1.00  0.00           C  
ATOM   1031  O   ALA A 136      18.719 -25.874 -64.024  1.00  0.00           O  
ATOM   1032  CB  ALA A 136      18.652 -25.659 -66.710  1.00  0.00           C  
ATOM   1033  N   LYS A 137      18.233 -28.095 -63.920  1.00  0.00           N  
ATOM   1034  CA  LYS A 137      18.397 -28.219 -62.465  1.00  0.00           C  
ATOM   1035  C   LYS A 137      19.819 -28.430 -62.025  1.00  0.00           C  
ATOM   1036  O   LYS A 137      20.473 -29.381 -62.391  1.00  0.00           O  
ATOM   1037  CB  LYS A 137      17.538 -29.369 -61.933  1.00  0.00           C  
ATOM   1038  CG  LYS A 137      17.553 -29.516 -60.418  1.00  0.00           C  
ATOM   1039  CD  LYS A 137      16.521 -30.532 -59.951  1.00  0.00           C  
ATOM   1040  CE  LYS A 137      16.494 -30.638 -58.434  1.00  0.00           C  
ATOM   1041  NZ  LYS A 137      16.000 -29.387 -57.797  1.00  0.00           N1+
ATOM   1042  N   ASP A 138      20.284 -27.518 -61.114  1.00  0.00           N  
ATOM   1043  CA  ASP A 138      21.722 -27.616 -60.667  1.00  0.00           C  
ATOM   1044  C   ASP A 138      22.051 -27.089 -59.237  1.00  0.00           C  
ATOM   1045  O   ASP A 138      23.244 -27.058 -58.833  1.00  0.00           O  
ATOM   1046  CB  ASP A 138      22.610 -26.867 -61.663  1.00  0.00           C  
ATOM   1047  CG  ASP A 138      22.262 -25.388 -61.773  1.00  0.00           C  
ATOM   1048  OD1 ASP A 138      21.584 -24.892 -60.905  1.00  0.00           O  
ATOM   1049  OD2 ASP A 138      22.677 -24.770 -62.723  1.00  0.00           O1-
ATOM   1050  N   GLY A 139      21.027 -26.628 -58.570  1.00  0.00           N  
ATOM   1051  CA  GLY A 139      21.173 -26.055 -57.207  1.00  0.00           C  
ATOM   1052  C   GLY A 139      21.008 -24.566 -57.158  1.00  0.00           C  
ATOM   1053  O   GLY A 139      20.977 -24.026 -56.052  1.00  0.00           O  
ATOM   1054  N   LYS A 140      21.029 -23.800 -58.311  1.00  0.00           N  
ATOM   1055  CA  LYS A 140      20.829 -22.328 -58.333  1.00  0.00           C  
ATOM   1056  C   LYS A 140      19.473 -21.910 -58.851  1.00  0.00           C  
ATOM   1057  O   LYS A 140      19.248 -20.750 -59.010  1.00  0.00           O  
ATOM   1058  CB  LYS A 140      21.911 -21.655 -59.179  1.00  0.00           C  
ATOM   1059  CG  LYS A 140      23.320 -21.781 -58.615  1.00  0.00           C  
ATOM   1060  CD  LYS A 140      24.332 -21.054 -59.488  1.00  0.00           C  
ATOM   1061  CE  LYS A 140      25.738 -21.167 -58.918  1.00  0.00           C  
ATOM   1062  NZ  LYS A 140      26.744 -20.486 -59.778  1.00  0.00           N1+
ATOM   1063  N   GLU A 141      18.639 -22.894 -59.154  1.00  0.00           N  
ATOM   1064  CA  GLU A 141      17.340 -22.631 -59.669  1.00  0.00           C  
ATOM   1065  C   GLU A 141      16.458 -22.173 -58.518  1.00  0.00           C  
ATOM   1066  O   GLU A 141      16.691 -22.642 -57.379  1.00  0.00           O  
ATOM   1067  CB  GLU A 141      16.762 -23.876 -60.345  1.00  0.00           C  
ATOM   1068  CG  GLU A 141      16.387 -24.996 -59.385  1.00  0.00           C  
ATOM   1069  CD  GLU A 141      17.543 -25.903 -59.066  1.00  0.00           C  
ATOM   1070  OE1 GLU A 141      18.616 -25.666 -59.567  1.00  0.00           O  
ATOM   1071  OE2 GLU A 141      17.352 -26.835 -58.320  1.00  0.00           O1-
ATOM   1072  N   ILE A 142      15.464 -21.325 -58.722  1.00  0.00           N  
ATOM   1073  CA  ILE A 142      14.473 -20.950 -57.651  1.00  0.00           C  
ATOM   1074  C   ILE A 142      13.349 -22.081 -57.626  1.00  0.00           C  
ATOM   1075  O   ILE A 142      12.805 -22.431 -58.634  1.00  0.00           O  
ATOM   1076  CB  ILE A 142      13.850 -19.567 -57.912  1.00  0.00           C  
ATOM   1077  CG1 ILE A 142      14.912 -18.471 -57.796  1.00  0.00           C  
ATOM   1078  CG2 ILE A 142      12.706 -19.308 -56.943  1.00  0.00           C  
ATOM   1079  CD1 ILE A 142      14.420 -17.098 -58.195  1.00  0.00           C  
ATOM   1080  N   ASP A 143      13.115 -22.610 -56.438  1.00  0.00           N  
ATOM   1081  CA  ASP A 143      12.028 -23.589 -56.147  1.00  0.00           C  
ATOM   1082  C   ASP A 143      10.698 -22.859 -56.219  1.00  0.00           C  
ATOM   1083  O   ASP A 143      10.609 -21.731 -55.754  1.00  0.00           O  
ATOM   1084  CB  ASP A 143      12.196 -24.233 -54.768  1.00  0.00           C  
ATOM   1085  CG  ASP A 143      11.180 -25.336 -54.502  1.00  0.00           C  
ATOM   1086  OD1 ASP A 143      10.049 -25.019 -54.218  1.00  0.00           O  
ATOM   1087  OD2 ASP A 143      11.545 -26.484 -54.586  1.00  0.00           O1-
ATOM   1088  N   THR A 144       9.629 -23.449 -56.787  1.00  0.00           N  
ATOM   1089  CA  THR A 144       8.303 -22.821 -56.898  1.00  0.00           C  
ATOM   1090  C   THR A 144       7.624 -22.247 -55.596  1.00  0.00           C  
ATOM   1091  O   THR A 144       6.677 -21.468 -55.638  1.00  0.00           O  
ATOM   1092  CB  THR A 144       7.341 -23.838 -57.539  1.00  0.00           C  
ATOM   1093  CG2 THR A 144       7.808 -24.205 -58.939  1.00  0.00           C  
ATOM   1094  OG1 THR A 144       7.286 -25.022 -56.732  1.00  0.00           O  
ATOM   1095  N   LYS A 145       8.211 -22.693 -54.400  1.00  0.00           N  
ATOM   1096  CA  LYS A 145       7.733 -22.138 -53.127  1.00  0.00           C  
ATOM   1097  C   LYS A 145       7.865 -20.589 -53.001  1.00  0.00           C  
ATOM   1098  O   LYS A 145       7.160 -20.098 -52.148  1.00  0.00           O  
ATOM   1099  CB  LYS A 145       8.479 -22.813 -51.975  1.00  0.00           C  
ATOM   1100  CG  LYS A 145       9.935 -22.389 -51.835  1.00  0.00           C  
ATOM   1101  CD  LYS A 145      10.644 -23.193 -50.756  1.00  0.00           C  
ATOM   1102  CE  LYS A 145      10.050 -22.921 -49.381  1.00  0.00           C  
ATOM   1103  NZ  LYS A 145      10.824 -23.587 -48.299  1.00  0.00           N1+
ATOM   1104  N   HIS A 146       8.659 -19.941 -53.817  1.00  0.00           N  
ATOM   1105  CA  HIS A 146       8.679 -18.384 -53.796  1.00  0.00           C  
ATOM   1106  C   HIS A 146       8.240 -17.795 -55.185  1.00  0.00           C  
ATOM   1107  O   HIS A 146       8.472 -16.605 -55.411  1.00  0.00           O  
ATOM   1108  CB  HIS A 146      10.069 -17.846 -53.444  1.00  0.00           C  
ATOM   1109  CG  HIS A 146      10.482 -18.123 -52.032  1.00  0.00           C  
ATOM   1110  CD2 HIS A 146      11.386 -18.992 -51.521  1.00  0.00           C  
ATOM   1111  ND1 HIS A 146       9.937 -17.459 -50.953  1.00  0.00           N  
ATOM   1112  CE1 HIS A 146      10.488 -17.908 -49.839  1.00  0.00           C  
ATOM   1113  NE2 HIS A 146      11.370 -18.838 -50.157  1.00  0.00           N  
ATOM   1114  N   LEU A 147       7.509 -18.591 -56.070  1.00  0.00           N  
ATOM   1115  CA  LEU A 147       7.095 -18.102 -57.374  1.00  0.00           C  
ATOM   1116  C   LEU A 147       5.539 -17.909 -57.414  1.00  0.00           C  
ATOM   1117  O   LEU A 147       4.754 -18.726 -56.907  1.00  0.00           O  
ATOM   1118  CB  LEU A 147       7.547 -19.083 -58.463  1.00  0.00           C  
ATOM   1119  CG  LEU A 147       9.055 -19.351 -58.532  1.00  0.00           C  
ATOM   1120  CD1 LEU A 147       9.343 -20.355 -59.640  1.00  0.00           C  
ATOM   1121  CD2 LEU A 147       9.793 -18.043 -58.774  1.00  0.00           C  
ATOM   1122  N   PRO A 148       5.022 -16.842 -58.061  1.00  0.00           N  
ATOM   1123  CA  PRO A 148       3.633 -16.534 -58.364  1.00  0.00           C  
ATOM   1124  C   PRO A 148       2.991 -17.748 -59.118  1.00  0.00           C  
ATOM   1125  O   PRO A 148       3.618 -18.501 -59.850  1.00  0.00           O  
ATOM   1126  CB  PRO A 148       3.744 -15.287 -59.247  1.00  0.00           C  
ATOM   1127  CG  PRO A 148       5.029 -14.657 -58.830  1.00  0.00           C  
ATOM   1128  CD  PRO A 148       5.947 -15.820 -58.563  1.00  0.00           C  
ATOM   1129  N   SER A 149       1.683 -17.888 -58.975  1.00  0.00           N  
ATOM   1130  CA  SER A 149       0.841 -19.007 -59.495  1.00  0.00           C  
ATOM   1131  C   SER A 149       0.930 -19.089 -61.046  1.00  0.00           C  
ATOM   1132  O   SER A 149       0.715 -20.169 -61.657  1.00  0.00           O  
ATOM   1133  CB  SER A 149      -0.603 -18.821 -59.070  1.00  0.00           C  
ATOM   1134  OG  SER A 149      -1.167 -17.698 -59.688  1.00  0.00           O  
ATOM   1135  N   THR A 150       1.276 -17.916 -61.665  1.00  0.00           N  
ATOM   1136  CA  THR A 150       1.417 -17.733 -63.122  1.00  0.00           C  
ATOM   1137  C   THR A 150       2.889 -17.841 -63.597  1.00  0.00           C  
ATOM   1138  O   THR A 150       3.102 -17.674 -64.774  1.00  0.00           O  
ATOM   1139  CB  THR A 150       0.839 -16.373 -63.554  1.00  0.00           C  
ATOM   1140  CG2 THR A 150      -0.632 -16.275 -63.179  1.00  0.00           C  
ATOM   1141  OG1 THR A 150       1.563 -15.316 -62.910  1.00  0.00           O  
ATOM   1142  N   CYS A 151       3.754 -18.119 -62.667  1.00  0.00           N  
ATOM   1143  CA  CYS A 151       5.212 -18.203 -62.960  1.00  0.00           C  
ATOM   1144  C   CYS A 151       5.861 -19.469 -62.487  1.00  0.00           C  
ATOM   1145  O   CYS A 151       6.981 -19.549 -61.947  1.00  0.00           O  
ATOM   1146  CB  CYS A 151       5.959 -17.033 -62.320  1.00  0.00           C  
ATOM   1147  SG  CYS A 151       5.434 -15.408 -62.916  1.00  0.00           S  
ATOM   1148  N   ARG A 152       5.152 -20.540 -62.568  1.00  0.00           N  
ATOM   1149  CA  ARG A 152       5.540 -21.876 -62.182  1.00  0.00           C  
ATOM   1150  C   ARG A 152       5.612 -22.976 -63.228  1.00  0.00           C  
ATOM   1151  O   ARG A 152       5.385 -24.151 -62.932  1.00  0.00           O  
ATOM   1152  CB  ARG A 152       4.585 -22.345 -61.095  1.00  0.00           C  
ATOM   1153  CG  ARG A 152       4.646 -21.547 -59.802  1.00  0.00           C  
ATOM   1154  CD  ARG A 152       3.536 -21.907 -58.882  1.00  0.00           C  
ATOM   1155  NE  ARG A 152       3.468 -21.011 -57.739  1.00  0.00           N  
ATOM   1156  CZ  ARG A 152       2.473 -21.005 -56.830  1.00  0.00           C  
ATOM   1157  NH1 ARG A 152       1.473 -21.850 -56.945  1.00  0.00           N1+
ATOM   1158  NH2 ARG A 152       2.503 -20.149 -55.824  1.00  0.00           N  
ATOM   1159  N   ASP A 153       5.814 -22.608 -64.482  1.00  0.00           N  
ATOM   1160  CA  ASP A 153       5.911 -23.484 -65.735  1.00  0.00           C  
ATOM   1161  C   ASP A 153       7.216 -24.285 -65.734  1.00  0.00           C  
ATOM   1162  O   ASP A 153       8.197 -24.027 -65.037  1.00  0.00           O  
ATOM   1163  CB  ASP A 153       5.846 -22.648 -67.016  1.00  0.00           C  
ATOM   1164  CG  ASP A 153       4.477 -22.021 -67.244  1.00  0.00           C  
ATOM   1165  OD1 ASP A 153       3.515 -22.537 -66.727  1.00  0.00           O  
ATOM   1166  OD2 ASP A 153       4.407 -21.032 -67.933  1.00  0.00           O1-
ATOM   1167  N   ASN A 154       7.237 -25.365 -66.563  1.00  0.00           N  
ATOM   1168  CA  ASN A 154       8.454 -26.227 -66.692  1.00  0.00           C  
ATOM   1169  C   ASN A 154       8.646 -26.805 -68.145  1.00  0.00           C  
ATOM   1170  O   ASN A 154       7.759 -26.606 -69.003  1.00  0.00           O  
ATOM   1171  CB  ASN A 154       8.398 -27.355 -65.678  1.00  0.00           C  
ATOM   1172  CG  ASN A 154       7.243 -28.288 -65.915  1.00  0.00           C  
ATOM   1173  ND2 ASN A 154       6.475 -28.539 -64.885  1.00  0.00           N  
ATOM   1174  OD1 ASN A 154       7.046 -28.781 -67.031  1.00  0.00           O  
ATOM   1175  N   PHE A 155       9.704 -27.574 -68.439  1.00  0.00           N  
ATOM   1176  CA  PHE A 155      10.052 -28.137 -69.711  1.00  0.00           C  
ATOM   1177  C   PHE A 155       8.957 -28.915 -70.480  1.00  0.00           C  
ATOM   1178  O   PHE A 155       9.174 -29.112 -71.698  1.00  0.00           O  
ATOM   1179  CB  PHE A 155      11.255 -29.057 -69.497  1.00  0.00           C  
ATOM   1180  CG  PHE A 155      10.929 -30.318 -68.748  1.00  0.00           C  
ATOM   1181  CD1 PHE A 155      10.722 -31.510 -69.425  1.00  0.00           C  
ATOM   1182  CD2 PHE A 155      10.828 -30.314 -67.365  1.00  0.00           C  
ATOM   1183  CE1 PHE A 155      10.422 -32.670 -68.737  1.00  0.00           C  
ATOM   1184  CE2 PHE A 155      10.529 -31.472 -66.675  1.00  0.00           C  
ATOM   1185  CZ  PHE A 155      10.326 -32.652 -67.362  1.00  0.00           C  
ATOM   1186  N   ASP A 156       7.873 -29.368 -69.826  1.00  0.00           N  
ATOM   1187  CA  ASP A 156       6.745 -30.044 -70.515  1.00  0.00           C  
ATOM   1188  C   ASP A 156       5.677 -29.197 -71.134  1.00  0.00           C  
ATOM   1189  O   ASP A 156       4.882 -29.703 -71.895  1.00  0.00           O  
ATOM   1190  CB  ASP A 156       6.050 -30.994 -69.537  1.00  0.00           C  
ATOM   1191  CG  ASP A 156       6.878 -32.232 -69.222  1.00  0.00           C  
ATOM   1192  OD1 ASP A 156       7.567 -32.700 -70.098  1.00  0.00           O  
ATOM   1193  OD2 ASP A 156       6.814 -32.698 -68.110  1.00  0.00           O1-
ATOM   1194  N   ALA A 157       5.751 -27.847 -70.926  1.00  0.00           N  
ATOM   1195  CA  ALA A 157       4.825 -26.854 -71.433  1.00  0.00           C  
ATOM   1196  C   ALA A 157       4.629 -26.678 -72.888  1.00  0.00           C  
ATOM   1197  O   ALA A 157       5.559 -26.732 -73.676  1.00  0.00           O  
ATOM   1198  CB  ALA A 157       5.189 -25.521 -70.734  1.00  0.00           C  
ATOM   1199  N   LYS A 158       3.358 -26.534 -73.318  1.00  0.00           N  
ATOM   1200  CA  LYS A 158       2.951 -26.360 -74.736  1.00  0.00           C  
ATOM   1201  C   LYS A 158       1.473 -25.846 -74.898  1.00  0.00           C  
ATOM   1202  O   LYS A 158       0.674 -25.925 -73.974  1.00  0.00           O  
ATOM   1203  CB  LYS A 158       3.128 -27.682 -75.486  1.00  0.00           C  
ATOM   1204  CG  LYS A 158       2.833 -27.602 -76.978  1.00  0.00           C  
ATOM   1205  CD  LYS A 158       3.123 -28.926 -77.669  1.00  0.00           C  
ATOM   1206  CE  LYS A 158       2.817 -28.852 -79.158  1.00  0.00           C  
ATOM   1207  NZ  LYS A 158       3.071 -30.149 -79.843  1.00  0.00           N1+
ATOM   1208  OXT LYS A 158       1.115 -25.367 -75.939  1.00  0.00           O1-
TER    1209      LYS A 158 
ATOM   1210  N   PHE B   1       6.932   6.758   2.098  1.00  0.00           N  
ATOM   1211  CA  PHE B   1       5.821   6.211   2.936  1.00  0.00           C  
ATOM   1212  C   PHE B   1       5.234   4.880   2.466  1.00  0.00           C  
ATOM   1213  O   PHE B   1       5.885   3.832   2.368  1.00  0.00           O  
ATOM   1214  CB  PHE B   1       4.683   7.230   3.015  1.00  0.00           C  
ATOM   1215  CG  PHE B   1       5.000   8.427   3.865  1.00  0.00           C  
ATOM   1216  CD1 PHE B   1       5.276   9.655   3.283  1.00  0.00           C  
ATOM   1217  CD2 PHE B   1       5.023   8.328   5.248  1.00  0.00           C  
ATOM   1218  CE1 PHE B   1       5.568  10.758   4.064  1.00  0.00           C  
ATOM   1219  CE2 PHE B   1       5.313   9.428   6.031  1.00  0.00           C  
ATOM   1220  CZ  PHE B   1       5.586  10.644   5.438  1.00  0.00           C  
ATOM   1221  N   THR B   2       3.970   4.883   1.972  1.00  0.00           N  
ATOM   1222  CA  THR B   2       3.287   3.653   1.506  1.00  0.00           C  
ATOM   1223  C   THR B   2       3.100   3.585  -0.022  1.00  0.00           C  
ATOM   1224  O   THR B   2       3.921   2.965  -0.671  1.00  0.00           O  
ATOM   1225  CB  THR B   2       1.911   3.512   2.182  1.00  0.00           C  
ATOM   1226  CG2 THR B   2       2.068   3.390   3.690  1.00  0.00           C  
ATOM   1227  OG1 THR B   2       1.108   4.661   1.880  1.00  0.00           O  
ATOM   1228  N   LEU B   3       2.041   4.247  -0.554  1.00  0.00           N  
ATOM   1229  CA  LEU B   3       1.880   4.301  -2.039  1.00  0.00           C  
ATOM   1230  C   LEU B   3       2.973   5.043  -2.745  1.00  0.00           C  
ATOM   1231  O   LEU B   3       3.032   6.266  -2.587  1.00  0.00           O  
ATOM   1232  CB  LEU B   3       0.545   4.960  -2.408  1.00  0.00           C  
ATOM   1233  CG  LEU B   3       0.243   5.058  -3.909  1.00  0.00           C  
ATOM   1234  CD1 LEU B   3       0.080   3.659  -4.487  1.00  0.00           C  
ATOM   1235  CD2 LEU B   3      -1.014   5.887  -4.121  1.00  0.00           C  
ATOM   1236  N   ILE B   4       3.656   4.277  -3.590  1.00  0.00           N  
ATOM   1237  CA  ILE B   4       4.770   4.624  -4.429  1.00  0.00           C  
ATOM   1238  C   ILE B   4       4.672   4.054  -5.837  1.00  0.00           C  
ATOM   1239  O   ILE B   4       5.026   4.878  -6.729  1.00  0.00           O  
ATOM   1240  CB  ILE B   4       6.082   4.149  -3.779  1.00  0.00           C  
ATOM   1241  CG1 ILE B   4       6.076   2.627  -3.615  1.00  0.00           C  
ATOM   1242  CG2 ILE B   4       6.289   4.832  -2.436  1.00  0.00           C  
ATOM   1243  CD1 ILE B   4       7.408   2.054  -3.185  1.00  0.00           C  
ATOM   1244  N   GLU B   5       4.058   2.979  -6.124  1.00  0.00           N  
ATOM   1245  CA  GLU B   5       3.874   2.440  -7.479  1.00  0.00           C  
ATOM   1246  C   GLU B   5       3.087   3.384  -8.398  1.00  0.00           C  
ATOM   1247  O   GLU B   5       3.450   3.350  -9.606  1.00  0.00           O  
ATOM   1248  CB  GLU B   5       3.161   1.088  -7.410  1.00  0.00           C  
ATOM   1249  CG  GLU B   5       1.858   1.104  -6.623  1.00  0.00           C  
ATOM   1250  CD  GLU B   5       2.062   0.890  -5.149  1.00  0.00           C  
ATOM   1251  OE1 GLU B   5       2.968   1.473  -4.603  1.00  0.00           O  
ATOM   1252  OE2 GLU B   5       1.311   0.142  -4.568  1.00  0.00           O1-
ATOM   1253  N   LEU B   6       2.283   4.255  -7.867  1.00  0.00           N  
ATOM   1254  CA  LEU B   6       1.635   5.342  -8.590  1.00  0.00           C  
ATOM   1255  C   LEU B   6       2.585   6.307  -9.321  1.00  0.00           C  
ATOM   1256  O   LEU B   6       2.397   6.557 -10.543  1.00  0.00           O  
ATOM   1257  CB  LEU B   6       0.772   6.143  -7.607  1.00  0.00           C  
ATOM   1258  CG  LEU B   6       0.099   7.396  -8.181  1.00  0.00           C  
ATOM   1259  CD1 LEU B   6      -0.884   6.991  -9.271  1.00  0.00           C  
ATOM   1260  CD2 LEU B   6      -0.604   8.152  -7.064  1.00  0.00           C  
ATOM   1261  N   MET B   7       3.499   6.953  -8.616  1.00  0.00           N  
ATOM   1262  CA  MET B   7       4.388   7.915  -9.167  1.00  0.00           C  
ATOM   1263  C   MET B   7       5.377   7.177 -10.015  1.00  0.00           C  
ATOM   1264  O   MET B   7       5.873   7.682 -11.031  1.00  0.00           O  
ATOM   1265  CB  MET B   7       5.081   8.716  -8.067  1.00  0.00           C  
ATOM   1266  CG  MET B   7       4.155   9.629  -7.274  1.00  0.00           C  
ATOM   1267  SD  MET B   7       3.226  10.761  -8.328  1.00  0.00           S  
ATOM   1268  CE  MET B   7       4.550  11.764  -8.997  1.00  0.00           C  
ATOM   1269  N   ILE B   8       5.736   5.911  -9.707  1.00  0.00           N  
ATOM   1270  CA  ILE B   8       6.627   5.066 -10.518  1.00  0.00           C  
ATOM   1271  C   ILE B   8       6.161   4.748 -11.893  1.00  0.00           C  
ATOM   1272  O   ILE B   8       6.780   5.019 -12.864  1.00  0.00           O  
ATOM   1273  CB  ILE B   8       6.893   3.729  -9.803  1.00  0.00           C  
ATOM   1274  CG1 ILE B   8       7.735   3.954  -8.544  1.00  0.00           C  
ATOM   1275  CG2 ILE B   8       7.584   2.751 -10.741  1.00  0.00           C  
ATOM   1276  CD1 ILE B   8       7.817   2.746  -7.640  1.00  0.00           C  
ATOM   1277  N   VAL B   9       4.866   4.350 -12.049  1.00  0.00           N  
ATOM   1278  CA  VAL B   9       4.150   4.115 -13.390  1.00  0.00           C  
ATOM   1279  C   VAL B   9       4.009   5.479 -14.039  1.00  0.00           C  
ATOM   1280  O   VAL B   9       4.359   5.563 -15.214  1.00  0.00           O  
ATOM   1281  CB  VAL B   9       2.755   3.483 -13.219  1.00  0.00           C  
ATOM   1282  CG1 VAL B   9       2.017   3.454 -14.549  1.00  0.00           C  
ATOM   1283  CG2 VAL B   9       2.889   2.081 -12.645  1.00  0.00           C  
ATOM   1284  N   ILE B  10       3.670   6.590 -13.378  1.00  0.00           N  
ATOM   1285  CA  ILE B  10       3.566   7.900 -13.990  1.00  0.00           C  
ATOM   1286  C   ILE B  10       4.912   8.213 -14.628  1.00  0.00           C  
ATOM   1287  O   ILE B  10       5.011   8.599 -15.798  1.00  0.00           O  
ATOM   1288  CB  ILE B  10       3.188   8.985 -12.964  1.00  0.00           C  
ATOM   1289  CG1 ILE B  10       1.731   8.820 -12.526  1.00  0.00           C  
ATOM   1290  CG2 ILE B  10       3.420  10.371 -13.546  1.00  0.00           C  
ATOM   1291  CD1 ILE B  10       1.361   9.646 -11.314  1.00  0.00           C  
ATOM   1292  N   ALA B  11       6.049   7.985 -13.936  1.00  0.00           N  
ATOM   1293  CA  ALA B  11       7.374   8.148 -14.479  1.00  0.00           C  
ATOM   1294  C   ALA B  11       7.767   7.315 -15.737  1.00  0.00           C  
ATOM   1295  O   ALA B  11       8.359   7.888 -16.610  1.00  0.00           O  
ATOM   1296  CB  ALA B  11       8.359   7.859 -13.305  1.00  0.00           C  
ATOM   1297  N   ILE B  12       7.343   6.046 -15.782  1.00  0.00           N  
ATOM   1298  CA  ILE B  12       7.512   5.118 -16.855  1.00  0.00           C  
ATOM   1299  C   ILE B  12       6.728   5.643 -18.094  1.00  0.00           C  
ATOM   1300  O   ILE B  12       7.124   5.529 -19.268  1.00  0.00           O  
ATOM   1301  CB  ILE B  12       7.024   3.716 -16.446  1.00  0.00           C  
ATOM   1302  CG1 ILE B  12       7.922   3.138 -15.349  1.00  0.00           C  
ATOM   1303  CG2 ILE B  12       6.990   2.792 -17.653  1.00  0.00           C  
ATOM   1304  CD1 ILE B  12       9.364   2.966 -15.769  1.00  0.00           C  
ATOM   1305  N   VAL B  13       5.558   6.193 -17.861  1.00  0.00           N  
ATOM   1306  CA  VAL B  13       4.665   6.801 -18.947  1.00  0.00           C  
ATOM   1307  C   VAL B  13       5.489   7.971 -19.574  1.00  0.00           C  
ATOM   1308  O   VAL B  13       5.647   8.094 -20.792  1.00  0.00           O  
ATOM   1309  CB  VAL B  13       3.336   7.333 -18.378  1.00  0.00           C  
ATOM   1310  CG1 VAL B  13       2.586   8.131 -19.433  1.00  0.00           C  
ATOM   1311  CG2 VAL B  13       2.489   6.175 -17.873  1.00  0.00           C  
ATOM   1312  N   GLY B  14       6.132   8.764 -18.703  1.00  0.00           N  
ATOM   1313  CA  GLY B  14       7.054   9.829 -19.032  1.00  0.00           C  
ATOM   1314  C   GLY B  14       8.217   9.362 -19.841  1.00  0.00           C  
ATOM   1315  O   GLY B  14       8.525  10.038 -20.827  1.00  0.00           O  
ATOM   1316  N   ILE B  15       8.821   8.230 -19.442  1.00  0.00           N  
ATOM   1317  CA  ILE B  15       9.887   7.664 -20.191  1.00  0.00           C  
ATOM   1318  C   ILE B  15       9.382   7.180 -21.590  1.00  0.00           C  
ATOM   1319  O   ILE B  15       9.961   7.574 -22.581  1.00  0.00           O  
ATOM   1320  CB  ILE B  15      10.520   6.502 -19.405  1.00  0.00           C  
ATOM   1321  CG1 ILE B  15      11.184   7.020 -18.126  1.00  0.00           C  
ATOM   1322  CG2 ILE B  15      11.530   5.763 -20.270  1.00  0.00           C  
ATOM   1323  CD1 ILE B  15      12.301   8.007 -18.375  1.00  0.00           C  
ATOM   1324  N   LEU B  16       8.239   6.564 -21.613  1.00  0.00           N  
ATOM   1325  CA  LEU B  16       7.612   6.110 -22.914  1.00  0.00           C  
ATOM   1326  C   LEU B  16       7.455   7.278 -23.940  1.00  0.00           C  
ATOM   1327  O   LEU B  16       7.767   7.083 -25.095  1.00  0.00           O  
ATOM   1328  CB  LEU B  16       6.236   5.486 -22.649  1.00  0.00           C  
ATOM   1329  CG  LEU B  16       5.492   4.965 -23.885  1.00  0.00           C  
ATOM   1330  CD1 LEU B  16       6.317   3.873 -24.552  1.00  0.00           C  
ATOM   1331  CD2 LEU B  16       4.125   4.442 -23.471  1.00  0.00           C  
ATOM   1332  N   ALA B  17       7.041   8.474 -23.502  1.00  0.00           N  
ATOM   1333  CA  ALA B  17       6.938   9.740 -24.256  1.00  0.00           C  
ATOM   1334  C   ALA B  17       8.336  10.159 -24.798  1.00  0.00           C  
ATOM   1335  O   ALA B  17       8.549  10.420 -25.979  1.00  0.00           O  
ATOM   1336  CB  ALA B  17       6.238  10.773 -23.373  1.00  0.00           C  
ATOM   1337  N   ALA B  18       9.352  10.113 -23.918  1.00  0.00           N  
ATOM   1338  CA  ALA B  18      10.751  10.367 -24.287  1.00  0.00           C  
ATOM   1339  C   ALA B  18      11.232   9.300 -25.330  1.00  0.00           C  
ATOM   1340  O   ALA B  18      12.043   9.644 -26.300  1.00  0.00           O  
ATOM   1341  CB  ALA B  18      11.673  10.307 -23.111  1.00  0.00           C  
ATOM   1342  N   VAL B  19      10.859   8.022 -25.294  1.00  0.00           N  
ATOM   1343  CA  VAL B  19      11.116   6.943 -26.214  1.00  0.00           C  
ATOM   1344  C   VAL B  19      10.307   7.194 -27.575  1.00  0.00           C  
ATOM   1345  O   VAL B  19      10.776   6.983 -28.673  1.00  0.00           O  
ATOM   1346  CB  VAL B  19      10.707   5.608 -25.564  1.00  0.00           C  
ATOM   1347  CG1 VAL B  19      10.775   4.478 -26.581  1.00  0.00           C  
ATOM   1348  CG2 VAL B  19      11.605   5.315 -24.372  1.00  0.00           C  
ATOM   1349  N   ALA B  20       9.043   7.612 -27.529  1.00  0.00           N  
ATOM   1350  CA  ALA B  20       8.126   7.930 -28.694  1.00  0.00           C  
ATOM   1351  C   ALA B  20       8.643   9.131 -29.579  1.00  0.00           C  
ATOM   1352  O   ALA B  20       8.741   8.948 -30.775  1.00  0.00           O  
ATOM   1353  CB  ALA B  20       6.727   8.396 -28.217  1.00  0.00           C  
ATOM   1354  N   LEU B  21       9.251  10.173 -28.988  1.00  0.00           N  
ATOM   1355  CA  LEU B  21       9.752  11.384 -29.601  1.00  0.00           C  
ATOM   1356  C   LEU B  21      10.745  11.102 -30.793  1.00  0.00           C  
ATOM   1357  O   LEU B  21      10.474  11.635 -31.850  1.00  0.00           O  
ATOM   1358  CB  LEU B  21      10.442  12.233 -28.526  1.00  0.00           C  
ATOM   1359  CG  LEU B  21      11.228  13.447 -29.039  1.00  0.00           C  
ATOM   1360  CD1 LEU B  21      10.281  14.399 -29.756  1.00  0.00           C  
ATOM   1361  CD2 LEU B  21      11.916  14.137 -27.871  1.00  0.00           C  
ATOM   1362  N   PRO B  22      11.908  10.452 -30.605  1.00  0.00           N  
ATOM   1363  CA  PRO B  22      12.834  10.219 -31.676  1.00  0.00           C  
ATOM   1364  C   PRO B  22      12.298   9.104 -32.725  1.00  0.00           C  
ATOM   1365  O   PRO B  22      12.592   9.258 -33.914  1.00  0.00           O  
ATOM   1366  CB  PRO B  22      14.070   9.756 -30.899  1.00  0.00           C  
ATOM   1367  CG  PRO B  22      13.511   9.054 -29.708  1.00  0.00           C  
ATOM   1368  CD  PRO B  22      12.308   9.872 -29.322  1.00  0.00           C  
ATOM   1369  N   ALA B  23      11.455   8.140 -32.274  1.00  0.00           N  
ATOM   1370  CA  ALA B  23      10.769   7.142 -33.149  1.00  0.00           C  
ATOM   1371  C   ALA B  23       9.688   7.768 -34.059  1.00  0.00           C  
ATOM   1372  O   ALA B  23       9.742   7.554 -35.244  1.00  0.00           O  
ATOM   1373  CB  ALA B  23      10.217   6.084 -32.145  1.00  0.00           C  
ATOM   1374  N   TYR B  24       8.816   8.610 -33.549  1.00  0.00           N  
ATOM   1375  CA  TYR B  24       7.952   9.404 -34.313  1.00  0.00           C  
ATOM   1376  C   TYR B  24       8.637  10.349 -35.305  1.00  0.00           C  
ATOM   1377  O   TYR B  24       8.228  10.256 -36.494  1.00  0.00           O  
ATOM   1378  CB  TYR B  24       7.058  10.194 -33.355  1.00  0.00           C  
ATOM   1379  CG  TYR B  24       6.079  11.113 -34.051  1.00  0.00           C  
ATOM   1380  CD1 TYR B  24       4.843  10.631 -34.455  1.00  0.00           C  
ATOM   1381  CD2 TYR B  24       6.418  12.437 -34.285  1.00  0.00           C  
ATOM   1382  CE1 TYR B  24       3.948  11.471 -35.091  1.00  0.00           C  
ATOM   1383  CE2 TYR B  24       5.524  13.277 -34.920  1.00  0.00           C  
ATOM   1384  CZ  TYR B  24       4.294  12.798 -35.322  1.00  0.00           C  
ATOM   1385  OH  TYR B  24       3.403  13.634 -35.956  1.00  0.00           O  
ATOM   1386  N   GLN B  25       9.657  11.181 -34.985  1.00  0.00           N  
ATOM   1387  CA  GLN B  25      10.418  12.006 -35.892  1.00  0.00           C  
ATOM   1388  C   GLN B  25      11.067  11.222 -37.058  1.00  0.00           C  
ATOM   1389  O   GLN B  25      10.842  11.591 -38.185  1.00  0.00           O  
ATOM   1390  CB  GLN B  25      11.496  12.753 -35.102  1.00  0.00           C  
ATOM   1391  CG  GLN B  25      10.957  13.843 -34.192  1.00  0.00           C  
ATOM   1392  CD  GLN B  25      12.040  14.466 -33.331  1.00  0.00           C  
ATOM   1393  NE2 GLN B  25      11.787  15.677 -32.848  1.00  0.00           N  
ATOM   1394  OE1 GLN B  25      13.093  13.865 -33.102  1.00  0.00           O  
ATOM   1395  N   ASP B  26      11.788  10.164 -36.776  1.00  0.00           N  
ATOM   1396  CA  ASP B  26      12.335   9.332 -37.843  1.00  0.00           C  
ATOM   1397  C   ASP B  26      11.383   8.650 -38.807  1.00  0.00           C  
ATOM   1398  O   ASP B  26      11.530   8.777 -39.978  1.00  0.00           O  
ATOM   1399  CB  ASP B  26      13.208   8.246 -37.208  1.00  0.00           C  
ATOM   1400  CG  ASP B  26      13.969   7.421 -38.237  1.00  0.00           C  
ATOM   1401  OD1 ASP B  26      14.811   7.973 -38.907  1.00  0.00           O  
ATOM   1402  OD2 ASP B  26      13.703   6.248 -38.344  1.00  0.00           O1-
ATOM   1403  N   TYR B  27      10.302   8.014 -38.327  1.00  0.00           N  
ATOM   1404  CA  TYR B  27       9.237   7.379 -39.106  1.00  0.00           C  
ATOM   1405  C   TYR B  27       8.500   8.366 -40.036  1.00  0.00           C  
ATOM   1406  O   TYR B  27       8.324   8.152 -41.227  1.00  0.00           O  
ATOM   1407  CB  TYR B  27       8.239   6.702 -38.164  1.00  0.00           C  
ATOM   1408  CG  TYR B  27       6.994   6.192 -38.856  1.00  0.00           C  
ATOM   1409  CD1 TYR B  27       7.098   5.219 -39.841  1.00  0.00           C  
ATOM   1410  CD2 TYR B  27       5.750   6.696 -38.508  1.00  0.00           C  
ATOM   1411  CE1 TYR B  27       5.961   4.753 -40.473  1.00  0.00           C  
ATOM   1412  CE2 TYR B  27       4.614   6.230 -39.140  1.00  0.00           C  
ATOM   1413  CZ  TYR B  27       4.717   5.263 -40.119  1.00  0.00           C  
ATOM   1414  OH  TYR B  27       3.585   4.798 -40.749  1.00  0.00           O  
ATOM   1415  N   THR B  28       8.042   9.455 -39.504  1.00  0.00           N  
ATOM   1416  CA  THR B  28       7.288  10.475 -40.210  1.00  0.00           C  
ATOM   1417  C   THR B  28       8.180  11.299 -41.216  1.00  0.00           C  
ATOM   1418  O   THR B  28       7.727  11.695 -42.278  1.00  0.00           O  
ATOM   1419  CB  THR B  28       6.615  11.420 -39.198  1.00  0.00           C  
ATOM   1420  CG2 THR B  28       5.631  10.655 -38.327  1.00  0.00           C  
ATOM   1421  OG1 THR B  28       7.614  12.024 -38.367  1.00  0.00           O  
ATOM   1422  N   ALA B  29       9.478  11.421 -40.895  1.00  0.00           N  
ATOM   1423  CA  ALA B  29      10.411  12.007 -41.777  1.00  0.00           C  
ATOM   1424  C   ALA B  29      10.499  11.218 -43.107  1.00  0.00           C  
ATOM   1425  O   ALA B  29      10.438  11.850 -44.151  1.00  0.00           O  
ATOM   1426  CB  ALA B  29      11.832  11.993 -41.092  1.00  0.00           C  
ATOM   1427  N   ARG B  30      10.564   9.879 -43.062  1.00  0.00           N  
ATOM   1428  CA  ARG B  30      10.498   8.984 -44.207  1.00  0.00           C  
ATOM   1429  C   ARG B  30       9.241   9.211 -45.022  1.00  0.00           C  
ATOM   1430  O   ARG B  30       9.185   9.269 -46.248  1.00  0.00           O  
ATOM   1431  CB  ARG B  30      10.545   7.533 -43.754  1.00  0.00           C  
ATOM   1432  CG  ARG B  30      10.473   6.509 -44.876  1.00  0.00           C  
ATOM   1433  CD  ARG B  30      10.551   5.119 -44.358  1.00  0.00           C  
ATOM   1434  NE  ARG B  30      10.442   4.137 -45.424  1.00  0.00           N  
ATOM   1435  CZ  ARG B  30       9.280   3.648 -45.899  1.00  0.00           C  
ATOM   1436  NH1 ARG B  30       8.138   4.060 -45.393  1.00  0.00           N1+
ATOM   1437  NH2 ARG B  30       9.287   2.755 -46.873  1.00  0.00           N  
ATOM   1438  N   ALA B  31       8.080   9.290 -44.381  1.00  0.00           N  
ATOM   1439  CA  ALA B  31       6.799   9.652 -44.999  1.00  0.00           C  
ATOM   1440  C   ALA B  31       6.720  11.015 -45.696  1.00  0.00           C  
ATOM   1441  O   ALA B  31       6.041  11.154 -46.739  1.00  0.00           O  
ATOM   1442  CB  ALA B  31       5.603   9.503 -44.026  1.00  0.00           C  
ATOM   1443  N   GLN B  32       7.334  12.071 -45.044  1.00  0.00           N  
ATOM   1444  CA  GLN B  32       7.465  13.459 -45.541  1.00  0.00           C  
ATOM   1445  C   GLN B  32       8.250  13.567 -46.880  1.00  0.00           C  
ATOM   1446  O   GLN B  32       7.718  14.156 -47.833  1.00  0.00           O  
ATOM   1447  CB  GLN B  32       8.145  14.325 -44.477  1.00  0.00           C  
ATOM   1448  CG  GLN B  32       7.284  14.602 -43.256  1.00  0.00           C  
ATOM   1449  CD  GLN B  32       8.101  15.071 -42.067  1.00  0.00           C  
ATOM   1450  NE2 GLN B  32       7.466  15.133 -40.902  1.00  0.00           N  
ATOM   1451  OE1 GLN B  32       9.290  15.375 -42.194  1.00  0.00           O  
ATOM   1452  N   VAL B  33       9.388  12.896 -46.931  1.00  0.00           N  
ATOM   1453  CA  VAL B  33      10.373  12.727 -48.052  1.00  0.00           C  
ATOM   1454  C   VAL B  33       9.779  11.926 -49.230  1.00  0.00           C  
ATOM   1455  O   VAL B  33       9.923  12.250 -50.405  1.00  0.00           O  
ATOM   1456  CB  VAL B  33      11.639  12.007 -47.550  1.00  0.00           C  
ATOM   1457  CG1 VAL B  33      12.548  11.654 -48.718  1.00  0.00           C  
ATOM   1458  CG2 VAL B  33      12.369  12.884 -46.544  1.00  0.00           C  
ATOM   1459  N   SER B  34       9.201  10.766 -48.897  1.00  0.00           N  
ATOM   1460  CA  SER B  34       8.496   9.907 -49.889  1.00  0.00           C  
ATOM   1461  C   SER B  34       7.239  10.559 -50.502  1.00  0.00           C  
ATOM   1462  O   SER B  34       7.124  10.328 -51.712  1.00  0.00           O  
ATOM   1463  CB  SER B  34       8.103   8.597 -49.236  1.00  0.00           C  
ATOM   1464  OG  SER B  34       7.158   8.805 -48.222  1.00  0.00           O  
ATOM   1465  N   GLU B  35       6.553  11.483 -49.778  1.00  0.00           N  
ATOM   1466  CA  GLU B  35       5.520  12.316 -50.480  1.00  0.00           C  
ATOM   1467  C   GLU B  35       6.202  13.119 -51.618  1.00  0.00           C  
ATOM   1468  O   GLU B  35       5.720  13.172 -52.775  1.00  0.00           O  
ATOM   1469  CB  GLU B  35       4.823  13.270 -49.508  1.00  0.00           C  
ATOM   1470  CG  GLU B  35       3.770  14.162 -50.148  1.00  0.00           C  
ATOM   1471  CD  GLU B  35       3.047  15.024 -49.151  1.00  0.00           C  
ATOM   1472  OE1 GLU B  35       3.655  15.922 -48.619  1.00  0.00           O  
ATOM   1473  OE2 GLU B  35       1.886  14.783 -48.919  1.00  0.00           O1-
ATOM   1474  N   ALA B  36       7.299  13.767 -51.325  1.00  0.00           N  
ATOM   1475  CA  ALA B  36       8.021  14.522 -52.389  1.00  0.00           C  
ATOM   1476  C   ALA B  36       8.440  13.686 -53.536  1.00  0.00           C  
ATOM   1477  O   ALA B  36       8.346  14.134 -54.655  1.00  0.00           O  
ATOM   1478  CB  ALA B  36       9.186  15.232 -51.691  1.00  0.00           C  
ATOM   1479  N   ILE B  37       8.895  12.500 -53.239  1.00  0.00           N  
ATOM   1480  CA  ILE B  37       9.328  11.604 -54.322  1.00  0.00           C  
ATOM   1481  C   ILE B  37       8.177  11.237 -55.193  1.00  0.00           C  
ATOM   1482  O   ILE B  37       8.334  11.200 -56.374  1.00  0.00           O  
ATOM   1483  CB  ILE B  37       9.969  10.316 -53.775  1.00  0.00           C  
ATOM   1484  CG1 ILE B  37      11.266  10.641 -53.029  1.00  0.00           C  
ATOM   1485  CG2 ILE B  37      10.233   9.331 -54.903  1.00  0.00           C  
ATOM   1486  CD1 ILE B  37      12.319  11.298 -53.893  1.00  0.00           C  
ATOM   1487  N   LEU B  38       7.021  10.917 -54.585  1.00  0.00           N  
ATOM   1488  CA  LEU B  38       5.806  10.522 -55.337  1.00  0.00           C  
ATOM   1489  C   LEU B  38       5.339  11.659 -56.263  1.00  0.00           C  
ATOM   1490  O   LEU B  38       5.025  11.524 -57.452  1.00  0.00           O  
ATOM   1491  CB  LEU B  38       4.676  10.147 -54.370  1.00  0.00           C  
ATOM   1492  CG  LEU B  38       3.337   9.780 -55.023  1.00  0.00           C  
ATOM   1493  CD1 LEU B  38       3.555   8.671 -56.043  1.00  0.00           C  
ATOM   1494  CD2 LEU B  38       2.350   9.347 -53.948  1.00  0.00           C  
ATOM   1495  N   LEU B  39       5.369  12.874 -55.729  1.00  0.00           N  
ATOM   1496  CA  LEU B  39       4.986  14.165 -56.409  1.00  0.00           C  
ATOM   1497  C   LEU B  39       5.998  14.333 -57.603  1.00  0.00           C  
ATOM   1498  O   LEU B  39       5.594  14.842 -58.632  1.00  0.00           O  
ATOM   1499  CB  LEU B  39       5.064  15.358 -55.448  1.00  0.00           C  
ATOM   1500  CG  LEU B  39       3.942  15.448 -54.406  1.00  0.00           C  
ATOM   1501  CD1 LEU B  39       4.275  16.535 -53.393  1.00  0.00           C  
ATOM   1502  CD2 LEU B  39       2.622  15.737 -55.104  1.00  0.00           C  
ATOM   1503  N   ALA B  40       7.272  14.053 -57.435  1.00  0.00           N  
ATOM   1504  CA  ALA B  40       8.211  14.052 -58.470  1.00  0.00           C  
ATOM   1505  C   ALA B  40       8.051  12.990 -59.598  1.00  0.00           C  
ATOM   1506  O   ALA B  40       8.356  13.171 -60.771  1.00  0.00           O  
ATOM   1507  CB  ALA B  40       9.561  13.898 -57.742  1.00  0.00           C  
ATOM   1508  N   GLU B  41       7.600  11.788 -59.188  1.00  0.00           N  
ATOM   1509  CA  GLU B  41       7.226  10.671 -60.107  1.00  0.00           C  
ATOM   1510  C   GLU B  41       6.027  11.023 -60.998  1.00  0.00           C  
ATOM   1511  O   GLU B  41       5.004  11.561 -60.536  1.00  0.00           O  
ATOM   1512  CB  GLU B  41       6.903   9.407 -59.307  1.00  0.00           C  
ATOM   1513  CG  GLU B  41       8.098   8.792 -58.592  1.00  0.00           C  
ATOM   1514  CD  GLU B  41       9.090   8.174 -59.537  1.00  0.00           C  
ATOM   1515  OE1 GLU B  41       8.674   7.485 -60.438  1.00  0.00           O  
ATOM   1516  OE2 GLU B  41      10.265   8.390 -59.358  1.00  0.00           O1-
ATOM   1517  N   GLY B  42       6.080  10.581 -62.311  1.00  0.00           N  
ATOM   1518  CA  GLY B  42       5.064  10.919 -63.336  1.00  0.00           C  
ATOM   1519  C   GLY B  42       5.364  12.314 -63.995  1.00  0.00           C  
ATOM   1520  O   GLY B  42       5.268  12.386 -65.221  1.00  0.00           O  
ATOM   1521  N   GLN B  43       5.711  13.315 -63.155  1.00  0.00           N  
ATOM   1522  CA  GLN B  43       6.213  14.614 -63.600  1.00  0.00           C  
ATOM   1523  C   GLN B  43       7.545  14.358 -64.381  1.00  0.00           C  
ATOM   1524  O   GLN B  43       7.745  14.861 -65.498  1.00  0.00           O  
ATOM   1525  CB  GLN B  43       6.435  15.555 -62.412  1.00  0.00           C  
ATOM   1526  CG  GLN B  43       6.890  16.951 -62.801  1.00  0.00           C  
ATOM   1527  CD  GLN B  43       7.023  17.871 -61.602  1.00  0.00           C  
ATOM   1528  NE2 GLN B  43       7.040  19.175 -61.857  1.00  0.00           N  
ATOM   1529  OE1 GLN B  43       7.109  17.415 -60.458  1.00  0.00           O  
ATOM   1530  N   LYS B  44       8.450  13.516 -63.926  1.00  0.00           N  
ATOM   1531  CA  LYS B  44       9.719  13.114 -64.501  1.00  0.00           C  
ATOM   1532  C   LYS B  44       9.456  12.345 -65.882  1.00  0.00           C  
ATOM   1533  O   LYS B  44      10.294  12.354 -66.753  1.00  0.00           O  
ATOM   1534  CB  LYS B  44      10.488  12.245 -63.505  1.00  0.00           C  
ATOM   1535  CG  LYS B  44      10.022  10.796 -63.444  1.00  0.00           C  
ATOM   1536  CD  LYS B  44      10.911   9.968 -62.528  1.00  0.00           C  
ATOM   1537  CE  LYS B  44      10.677   8.478 -62.727  1.00  0.00           C  
ATOM   1538  NZ  LYS B  44      11.499   7.656 -61.798  1.00  0.00           N1+
ATOM   1539  N   SER B  45       8.300  11.697 -66.001  1.00  0.00           N  
ATOM   1540  CA  SER B  45       7.875  11.033 -67.230  1.00  0.00           C  
ATOM   1541  C   SER B  45       7.428  12.048 -68.301  1.00  0.00           C  
ATOM   1542  O   SER B  45       7.896  11.917 -69.410  1.00  0.00           O  
ATOM   1543  CB  SER B  45       6.745  10.069 -66.927  1.00  0.00           C  
ATOM   1544  OG  SER B  45       7.187   9.019 -66.110  1.00  0.00           O  
ATOM   1545  N   ALA B  46       6.699  13.083 -67.895  1.00  0.00           N  
ATOM   1546  CA  ALA B  46       6.513  14.209 -68.830  1.00  0.00           C  
ATOM   1547  C   ALA B  46       7.800  14.971 -69.288  1.00  0.00           C  
ATOM   1548  O   ALA B  46       7.996  15.306 -70.498  1.00  0.00           O  
ATOM   1549  CB  ALA B  46       5.537  15.182 -68.129  1.00  0.00           C  
ATOM   1550  N   VAL B  47       8.767  15.162 -68.364  1.00  0.00           N  
ATOM   1551  CA  VAL B  47      10.105  15.708 -68.652  1.00  0.00           C  
ATOM   1552  C   VAL B  47      10.803  14.687 -69.590  1.00  0.00           C  
ATOM   1553  O   VAL B  47      11.470  15.107 -70.498  1.00  0.00           O  
ATOM   1554  CB  VAL B  47      10.921  15.908 -67.361  1.00  0.00           C  
ATOM   1555  CG1 VAL B  47      12.359  16.278 -67.692  1.00  0.00           C  
ATOM   1556  CG2 VAL B  47      10.273  16.981 -66.499  1.00  0.00           C  
ATOM   1557  N   THR B  48      10.761  13.404 -69.284  1.00  0.00           N  
ATOM   1558  CA  THR B  48      11.274  12.453 -70.250  1.00  0.00           C  
ATOM   1559  C   THR B  48      10.699  12.538 -71.645  1.00  0.00           C  
ATOM   1560  O   THR B  48      11.507  12.575 -72.587  1.00  0.00           O  
ATOM   1561  CB  THR B  48      11.064  11.020 -69.727  1.00  0.00           C  
ATOM   1562  CG2 THR B  48      11.539  10.002 -70.753  1.00  0.00           C  
ATOM   1563  OG1 THR B  48      11.797  10.841 -68.507  1.00  0.00           O  
ATOM   1564  N   GLU B  49       9.389  12.625 -71.775  1.00  0.00           N  
ATOM   1565  CA  GLU B  49       8.681  12.738 -73.069  1.00  0.00           C  
ATOM   1566  C   GLU B  49       9.038  13.993 -73.859  1.00  0.00           C  
ATOM   1567  O   GLU B  49       9.273  13.906 -75.062  1.00  0.00           O  
ATOM   1568  CB  GLU B  49       7.168  12.710 -72.841  1.00  0.00           C  
ATOM   1569  CG  GLU B  49       6.633  11.376 -72.341  1.00  0.00           C  
ATOM   1570  CD  GLU B  49       6.690  10.295 -73.384  1.00  0.00           C  
ATOM   1571  OE1 GLU B  49       6.167  10.498 -74.453  1.00  0.00           O  
ATOM   1572  OE2 GLU B  49       7.258   9.264 -73.111  1.00  0.00           O1-
ATOM   1573  N   TYR B  50       9.269  15.164 -73.174  1.00  0.00           N  
ATOM   1574  CA  TYR B  50       9.808  16.337 -73.776  1.00  0.00           C  
ATOM   1575  C   TYR B  50      11.323  16.166 -74.260  1.00  0.00           C  
ATOM   1576  O   TYR B  50      11.713  16.370 -75.401  1.00  0.00           O  
ATOM   1577  CB  TYR B  50       9.666  17.490 -72.781  1.00  0.00           C  
ATOM   1578  CG  TYR B  50      10.112  18.828 -73.328  1.00  0.00           C  
ATOM   1579  CD1 TYR B  50       9.172  19.735 -73.793  1.00  0.00           C  
ATOM   1580  CD2 TYR B  50      11.461  19.147 -73.366  1.00  0.00           C  
ATOM   1581  CE1 TYR B  50       9.579  20.957 -74.294  1.00  0.00           C  
ATOM   1582  CE2 TYR B  50      11.869  20.368 -73.866  1.00  0.00           C  
ATOM   1583  CZ  TYR B  50      10.933  21.271 -74.329  1.00  0.00           C  
ATOM   1584  OH  TYR B  50      11.339  22.488 -74.827  1.00  0.00           O  
ATOM   1585  N   TYR B  51      12.221  15.780 -73.302  1.00  0.00           N  
ATOM   1586  CA  TYR B  51      13.668  15.635 -73.578  1.00  0.00           C  
ATOM   1587  C   TYR B  51      14.066  14.644 -74.732  1.00  0.00           C  
ATOM   1588  O   TYR B  51      14.743  14.967 -75.706  1.00  0.00           O  
ATOM   1589  CB  TYR B  51      14.370  15.214 -72.285  1.00  0.00           C  
ATOM   1590  CG  TYR B  51      15.866  15.043 -72.429  1.00  0.00           C  
ATOM   1591  CD1 TYR B  51      16.663  16.138 -72.731  1.00  0.00           C  
ATOM   1592  CD2 TYR B  51      16.441  13.793 -72.260  1.00  0.00           C  
ATOM   1593  CE1 TYR B  51      18.029  15.982 -72.863  1.00  0.00           C  
ATOM   1594  CE2 TYR B  51      17.807  13.637 -72.392  1.00  0.00           C  
ATOM   1595  CZ  TYR B  51      18.600  14.726 -72.692  1.00  0.00           C  
ATOM   1596  OH  TYR B  51      19.961  14.571 -72.823  1.00  0.00           O  
ATOM   1597  N   LEU B  52      13.520  13.452 -74.562  1.00  0.00           N  
ATOM   1598  CA  LEU B  52      13.635  12.409 -75.555  1.00  0.00           C  
ATOM   1599  C   LEU B  52      13.201  12.695 -77.055  1.00  0.00           C  
ATOM   1600  O   LEU B  52      13.744  12.018 -77.927  1.00  0.00           O  
ATOM   1601  CB  LEU B  52      12.829  11.217 -75.022  1.00  0.00           C  
ATOM   1602  CG  LEU B  52      12.916   9.931 -75.853  1.00  0.00           C  
ATOM   1603  CD1 LEU B  52      14.365   9.467 -75.921  1.00  0.00           C  
ATOM   1604  CD2 LEU B  52      12.029   8.863 -75.230  1.00  0.00           C  
ATOM   1605  N   ASN B  53      12.230  13.511 -77.355  1.00  0.00           N  
ATOM   1606  CA  ASN B  53      11.734  13.855 -78.638  1.00  0.00           C  
ATOM   1607  C   ASN B  53      12.217  15.251 -79.089  1.00  0.00           C  
ATOM   1608  O   ASN B  53      12.466  15.431 -80.252  1.00  0.00           O  
ATOM   1609  CB  ASN B  53      10.220  13.830 -78.610  1.00  0.00           C  
ATOM   1610  CG  ASN B  53       9.652  12.403 -78.412  1.00  0.00           C  
ATOM   1611  ND2 ASN B  53       9.160  12.023 -77.260  1.00  0.00           N  
ATOM   1612  OD1 ASN B  53       9.729  11.594 -79.312  1.00  0.00           O  
ATOM   1613  N   HIS B  54      12.438  16.238 -78.208  1.00  0.00           N  
ATOM   1614  CA  HIS B  54      12.946  17.562 -78.516  1.00  0.00           C  
ATOM   1615  C   HIS B  54      14.481  17.699 -78.606  1.00  0.00           C  
ATOM   1616  O   HIS B  54      15.081  18.394 -79.409  1.00  0.00           O  
ATOM   1617  CB  HIS B  54      12.420  18.548 -77.468  1.00  0.00           C  
ATOM   1618  CG  HIS B  54      10.937  18.745 -77.517  1.00  0.00           C  
ATOM   1619  CD2 HIS B  54      10.188  19.774 -77.978  1.00  0.00           C  
ATOM   1620  ND1 HIS B  54      10.046  17.801 -77.051  1.00  0.00           N  
ATOM   1621  CE1 HIS B  54       8.812  18.243 -77.222  1.00  0.00           C  
ATOM   1622  NE2 HIS B  54       8.872  19.437 -77.782  1.00  0.00           N  
ATOM   1623  N   GLY B  55      15.196  16.918 -77.705  1.00  0.00           N  
ATOM   1624  CA  GLY B  55      16.668  16.874 -77.600  1.00  0.00           C  
ATOM   1625  C   GLY B  55      17.185  17.674 -76.424  1.00  0.00           C  
ATOM   1626  O   GLY B  55      18.243  17.236 -75.967  1.00  0.00           O  
ATOM   1627  N   LYS B  56      16.560  18.746 -76.032  1.00  0.00           N  
ATOM   1628  CA  LYS B  56      17.058  19.519 -74.883  1.00  0.00           C  
ATOM   1629  C   LYS B  56      16.099  19.487 -73.686  1.00  0.00           C  
ATOM   1630  O   LYS B  56      14.982  19.153 -73.782  1.00  0.00           O  
ATOM   1631  CB  LYS B  56      17.316  20.968 -75.297  1.00  0.00           C  
ATOM   1632  CG  LYS B  56      18.345  21.131 -76.408  1.00  0.00           C  
ATOM   1633  CD  LYS B  56      19.732  20.711 -75.943  1.00  0.00           C  
ATOM   1634  CE  LYS B  56      20.774  20.941 -77.027  1.00  0.00           C  
ATOM   1635  NZ  LYS B  56      22.144  20.589 -76.566  1.00  0.00           N1+
ATOM   1636  N   TRP B  57      16.624  19.719 -72.490  1.00  0.00           N  
ATOM   1637  CA  TRP B  57      15.784  19.596 -71.250  1.00  0.00           C  
ATOM   1638  C   TRP B  57      14.780  20.737 -71.150  1.00  0.00           C  
ATOM   1639  O   TRP B  57      15.097  21.874 -71.569  1.00  0.00           O  
ATOM   1640  CB  TRP B  57      16.657  19.589 -69.994  1.00  0.00           C  
ATOM   1641  CG  TRP B  57      17.489  18.351 -69.849  1.00  0.00           C  
ATOM   1642  CD1 TRP B  57      18.813  18.220 -70.144  1.00  0.00           C  
ATOM   1643  CD2 TRP B  57      17.054  17.056 -69.369  1.00  0.00           C  
ATOM   1644  CE2 TRP B  57      18.168  16.212 -69.407  1.00  0.00           C  
ATOM   1645  CE3 TRP B  57      15.828  16.552 -68.916  1.00  0.00           C  
ATOM   1646  NE1 TRP B  57      19.230  16.938 -69.884  1.00  0.00           N  
ATOM   1647  CZ2 TRP B  57      18.097  14.886 -69.011  1.00  0.00           C  
ATOM   1648  CZ3 TRP B  57      15.758  15.223 -68.518  1.00  0.00           C  
ATOM   1649  CH2 TRP B  57      16.864  14.412 -68.564  1.00  0.00           C  
ATOM   1650  N   PRO B  58      13.516  20.405 -70.587  1.00  0.00           N  
ATOM   1651  CA  PRO B  58      12.533  21.517 -70.455  1.00  0.00           C  
ATOM   1652  C   PRO B  58      12.898  22.494 -69.333  1.00  0.00           C  
ATOM   1653  O   PRO B  58      13.557  22.106 -68.374  1.00  0.00           O  
ATOM   1654  CB  PRO B  58      11.225  20.784 -70.143  1.00  0.00           C  
ATOM   1655  CG  PRO B  58      11.657  19.557 -69.415  1.00  0.00           C  
ATOM   1656  CD  PRO B  58      12.923  19.134 -70.112  1.00  0.00           C  
ATOM   1657  N   GLU B  59      12.571  23.751 -69.464  1.00  0.00           N  
ATOM   1658  CA  GLU B  59      12.864  24.825 -68.476  1.00  0.00           C  
ATOM   1659  C   GLU B  59      12.150  24.763 -67.155  1.00  0.00           C  
ATOM   1660  O   GLU B  59      12.709  24.738 -66.062  1.00  0.00           O  
ATOM   1661  CB  GLU B  59      12.557  26.189 -69.099  1.00  0.00           C  
ATOM   1662  CG  GLU B  59      12.835  27.374 -68.185  1.00  0.00           C  
ATOM   1663  CD  GLU B  59      12.545  28.696 -68.838  1.00  0.00           C  
ATOM   1664  OE1 GLU B  59      12.191  28.703 -69.993  1.00  0.00           O  
ATOM   1665  OE2 GLU B  59      12.678  29.702 -68.182  1.00  0.00           O1-
ATOM   1666  N   ASN B  60      10.816  24.644 -67.158  1.00  0.00           N  
ATOM   1667  CA  ASN B  60       9.861  24.643 -66.038  1.00  0.00           C  
ATOM   1668  C   ASN B  60       8.680  23.744 -66.306  1.00  0.00           C  
ATOM   1669  O   ASN B  60       8.464  23.022 -67.276  1.00  0.00           O  
ATOM   1670  CB  ASN B  60       9.383  26.051 -65.734  1.00  0.00           C  
ATOM   1671  CG  ASN B  60       8.629  26.665 -66.882  1.00  0.00           C  
ATOM   1672  ND2 ASN B  60       8.801  27.948 -67.073  1.00  0.00           N  
ATOM   1673  OD1 ASN B  60       7.890  25.976 -67.595  1.00  0.00           O  
ATOM   1674  N   ASN B  61       7.729  23.739 -65.326  1.00  0.00           N  
ATOM   1675  CA  ASN B  61       6.499  22.929 -65.303  1.00  0.00           C  
ATOM   1676  C   ASN B  61       5.641  23.115 -66.549  1.00  0.00           C  
ATOM   1677  O   ASN B  61       5.118  22.109 -67.061  1.00  0.00           O  
ATOM   1678  CB  ASN B  61       5.683  23.243 -64.062  1.00  0.00           C  
ATOM   1679  CG  ASN B  61       6.298  22.683 -62.810  1.00  0.00           C  
ATOM   1680  ND2 ASN B  61       5.726  23.014 -61.680  1.00  0.00           N  
ATOM   1681  OD1 ASN B  61       7.293  21.950 -62.866  1.00  0.00           O  
ATOM   1682  N   THR B  62       5.482  24.295 -67.037  1.00  0.00           N  
ATOM   1683  CA  THR B  62       4.738  24.608 -68.319  1.00  0.00           C  
ATOM   1684  C   THR B  62       5.382  24.257 -69.677  1.00  0.00           C  
ATOM   1685  O   THR B  62       4.781  23.867 -70.694  1.00  0.00           O  
ATOM   1686  CB  THR B  62       4.402  26.110 -68.360  1.00  0.00           C  
ATOM   1687  CG2 THR B  62       3.580  26.507 -67.143  1.00  0.00           C  
ATOM   1688  OG1 THR B  62       5.616  26.873 -68.382  1.00  0.00           O  
ATOM   1689  N   SER B  63       6.689  24.183 -69.620  1.00  0.00           N  
ATOM   1690  CA  SER B  63       7.473  23.637 -70.737  1.00  0.00           C  
ATOM   1691  C   SER B  63       7.610  22.153 -70.719  1.00  0.00           C  
ATOM   1692  O   SER B  63       7.523  21.525 -71.788  1.00  0.00           O  
ATOM   1693  CB  SER B  63       8.863  24.244 -70.741  1.00  0.00           C  
ATOM   1694  OG  SER B  63       9.606  23.802 -69.638  1.00  0.00           O  
ATOM   1695  N   ALA B  64       7.552  21.468 -69.579  1.00  0.00           N  
ATOM   1696  CA  ALA B  64       7.630  19.976 -69.469  1.00  0.00           C  
ATOM   1697  C   ALA B  64       6.329  19.237 -69.734  1.00  0.00           C  
ATOM   1698  O   ALA B  64       6.282  18.013 -69.899  1.00  0.00           O  
ATOM   1699  CB  ALA B  64       8.160  19.723 -68.004  1.00  0.00           C  
ATOM   1700  N   GLY B  65       5.200  20.022 -69.736  1.00  0.00           N  
ATOM   1701  CA  GLY B  65       3.807  19.458 -69.919  1.00  0.00           C  
ATOM   1702  C   GLY B  65       3.035  19.102 -68.636  1.00  0.00           C  
ATOM   1703  O   GLY B  65       2.120  18.248 -68.703  1.00  0.00           O  
ATOM   1704  N   VAL B  66       3.324  19.705 -67.481  1.00  0.00           N  
ATOM   1705  CA  VAL B  66       2.590  19.380 -66.269  1.00  0.00           C  
ATOM   1706  C   VAL B  66       1.840  20.571 -65.561  1.00  0.00           C  
ATOM   1707  O   VAL B  66       1.788  21.720 -66.153  1.00  0.00           O  
ATOM   1708  CB  VAL B  66       3.579  18.749 -65.271  1.00  0.00           C  
ATOM   1709  CG1 VAL B  66       4.173  17.472 -65.846  1.00  0.00           C  
ATOM   1710  CG2 VAL B  66       4.675  19.747 -64.928  1.00  0.00           C  
ATOM   1711  N   ALA B  67       1.205  20.295 -64.384  1.00  0.00           N  
ATOM   1712  CA  ALA B  67       0.485  21.339 -63.703  1.00  0.00           C  
ATOM   1713  C   ALA B  67       1.380  22.603 -63.619  1.00  0.00           C  
ATOM   1714  O   ALA B  67       2.512  22.601 -63.112  1.00  0.00           O  
ATOM   1715  CB  ALA B  67       0.002  20.886 -62.312  1.00  0.00           C  
ATOM   1716  N   SER B  68       0.786  23.772 -63.945  1.00  0.00           N  
ATOM   1717  CA  SER B  68       1.470  25.008 -64.181  1.00  0.00           C  
ATOM   1718  C   SER B  68       2.059  25.588 -62.890  1.00  0.00           C  
ATOM   1719  O   SER B  68       3.004  26.341 -62.964  1.00  0.00           O  
ATOM   1720  CB  SER B  68       0.514  26.000 -64.814  1.00  0.00           C  
ATOM   1721  OG  SER B  68      -0.515  26.343 -63.926  1.00  0.00           O  
ATOM   1722  N   SER B  69       1.423  25.384 -61.743  1.00  0.00           N  
ATOM   1723  CA  SER B  69       2.006  25.898 -60.540  1.00  0.00           C  
ATOM   1724  C   SER B  69       2.683  24.898 -59.667  1.00  0.00           C  
ATOM   1725  O   SER B  69       2.114  23.835 -59.467  1.00  0.00           O  
ATOM   1726  CB  SER B  69       0.929  26.595 -59.732  1.00  0.00           C  
ATOM   1727  OG  SER B  69       1.417  26.990 -58.479  1.00  0.00           O  
ATOM   1728  N   PRO B  70       3.800  25.183 -59.016  1.00  0.00           N  
ATOM   1729  CA  PRO B  70       4.414  24.319 -58.063  1.00  0.00           C  
ATOM   1730  C   PRO B  70       3.454  23.864 -56.948  1.00  0.00           C  
ATOM   1731  O   PRO B  70       3.652  22.839 -56.263  1.00  0.00           O  
ATOM   1732  CB  PRO B  70       5.539  25.205 -57.520  1.00  0.00           C  
ATOM   1733  CG  PRO B  70       5.871  26.113 -58.655  1.00  0.00           C  
ATOM   1734  CD  PRO B  70       4.543  26.406 -59.300  1.00  0.00           C  
ATOM   1735  N   THR B  71       2.405  24.627 -56.675  1.00  0.00           N  
ATOM   1736  CA  THR B  71       1.406  24.323 -55.614  1.00  0.00           C  
ATOM   1737  C   THR B  71       0.143  23.576 -56.026  1.00  0.00           C  
ATOM   1738  O   THR B  71      -0.818  23.212 -55.306  1.00  0.00           O  
ATOM   1739  CB  THR B  71       0.965  25.628 -54.926  1.00  0.00           C  
ATOM   1740  CG2 THR B  71       2.164  26.342 -54.319  1.00  0.00           C  
ATOM   1741  OG1 THR B  71       0.335  26.489 -55.884  1.00  0.00           O  
ATOM   1742  N   ASP B  72      -0.010  23.345 -57.319  1.00  0.00           N  
ATOM   1743  CA  ASP B  72      -1.216  22.637 -57.915  1.00  0.00           C  
ATOM   1744  C   ASP B  72      -1.330  21.216 -57.367  1.00  0.00           C  
ATOM   1745  O   ASP B  72      -2.427  20.789 -57.032  1.00  0.00           O  
ATOM   1746  CB  ASP B  72      -1.134  22.576 -59.442  1.00  0.00           C  
ATOM   1747  CG  ASP B  72      -1.459  23.908 -60.106  1.00  0.00           C  
ATOM   1748  OD1 ASP B  72      -2.072  24.732 -59.471  1.00  0.00           O  
ATOM   1749  OD2 ASP B  72      -1.091  24.087 -61.243  1.00  0.00           O1-
ATOM   1750  N   ILE B  73      -0.175  20.621 -57.083  1.00  0.00           N  
ATOM   1751  CA  ILE B  73       0.006  19.294 -56.488  1.00  0.00           C  
ATOM   1752  C   ILE B  73       0.603  19.378 -55.022  1.00  0.00           C  
ATOM   1753  O   ILE B  73       1.220  18.432 -54.518  1.00  0.00           O  
ATOM   1754  CB  ILE B  73       0.921  18.439 -57.384  1.00  0.00           C  
ATOM   1755  CG1 ILE B  73       2.285  19.113 -57.552  1.00  0.00           C  
ATOM   1756  CG2 ILE B  73       0.270  18.202 -58.738  1.00  0.00           C  
ATOM   1757  CD1 ILE B  73       3.322  18.237 -58.217  1.00  0.00           C  
ATOM   1758  N   LYS B  74       0.356  20.513 -54.410  1.00  0.00           N  
ATOM   1759  CA  LYS B  74       0.799  20.761 -53.012  1.00  0.00           C  
ATOM   1760  C   LYS B  74       0.293  19.677 -52.058  1.00  0.00           C  
ATOM   1761  O   LYS B  74      -0.924  19.393 -52.027  1.00  0.00           O  
ATOM   1762  CB  LYS B  74       0.324  22.133 -52.530  1.00  0.00           C  
ATOM   1763  CG  LYS B  74       0.805  22.511 -51.136  1.00  0.00           C  
ATOM   1764  CD  LYS B  74       0.336  23.905 -50.748  1.00  0.00           C  
ATOM   1765  CE  LYS B  74       0.816  24.285 -49.355  1.00  0.00           C  
ATOM   1766  NZ  LYS B  74       0.311  25.621 -48.937  1.00  0.00           N1+
ATOM   1767  N   GLY B  75       1.240  19.108 -51.311  1.00  0.00           N  
ATOM   1768  CA  GLY B  75       0.941  17.956 -50.457  1.00  0.00           C  
ATOM   1769  C   GLY B  75       0.676  18.146 -48.960  1.00  0.00           C  
ATOM   1770  O   GLY B  75       0.359  19.259 -48.703  1.00  0.00           O  
ATOM   1771  N   LYS B  76       0.688  17.149 -48.058  1.00  0.00           N  
ATOM   1772  CA  LYS B  76       0.450  17.265 -46.630  1.00  0.00           C  
ATOM   1773  C   LYS B  76       1.636  17.966 -45.975  1.00  0.00           C  
ATOM   1774  O   LYS B  76       1.396  18.858 -45.182  1.00  0.00           O  
ATOM   1775  CB  LYS B  76       0.220  15.890 -46.001  1.00  0.00           C  
ATOM   1776  CG  LYS B  76      -0.149  15.927 -44.524  1.00  0.00           C  
ATOM   1777  CD  LYS B  76      -0.536  14.547 -44.016  1.00  0.00           C  
ATOM   1778  CE  LYS B  76      -1.077  14.610 -42.595  1.00  0.00           C  
ATOM   1779  NZ  LYS B  76      -0.024  14.995 -41.616  1.00  0.00           N1+
ATOM   1780  N   TYR B  77       2.840  17.674 -46.514  1.00  0.00           N  
ATOM   1781  CA  TYR B  77       4.113  18.108 -45.932  1.00  0.00           C  
ATOM   1782  C   TYR B  77       4.843  18.977 -46.921  1.00  0.00           C  
ATOM   1783  O   TYR B  77       5.468  19.965 -46.543  1.00  0.00           O  
ATOM   1784  CB  TYR B  77       4.980  16.913 -45.531  1.00  0.00           C  
ATOM   1785  CG  TYR B  77       4.301  15.963 -44.569  1.00  0.00           C  
ATOM   1786  CD1 TYR B  77       3.919  14.700 -44.996  1.00  0.00           C  
ATOM   1787  CD2 TYR B  77       4.063  16.354 -43.260  1.00  0.00           C  
ATOM   1788  CE1 TYR B  77       3.299  13.832 -44.117  1.00  0.00           C  
ATOM   1789  CE2 TYR B  77       3.443  15.487 -42.381  1.00  0.00           C  
ATOM   1790  CZ  TYR B  77       3.063  14.230 -42.806  1.00  0.00           C  
ATOM   1791  OH  TYR B  77       2.446  13.366 -41.931  1.00  0.00           O  
ATOM   1792  N   VAL B  78       4.814  18.583 -48.237  1.00  0.00           N  
ATOM   1793  CA  VAL B  78       5.442  19.262 -49.382  1.00  0.00           C  
ATOM   1794  C   VAL B  78       4.642  20.536 -49.816  1.00  0.00           C  
ATOM   1795  O   VAL B  78       3.380  20.518 -50.068  1.00  0.00           O  
ATOM   1796  CB  VAL B  78       5.546  18.288 -50.570  1.00  0.00           C  
ATOM   1797  CG1 VAL B  78       6.134  18.991 -51.785  1.00  0.00           C  
ATOM   1798  CG2 VAL B  78       6.392  17.086 -50.181  1.00  0.00           C  
ATOM   1799  N   LYS B  79       5.426  21.588 -49.944  1.00  0.00           N  
ATOM   1800  CA  LYS B  79       4.964  22.882 -50.239  1.00  0.00           C  
ATOM   1801  C   LYS B  79       4.921  23.132 -51.753  1.00  0.00           C  
ATOM   1802  O   LYS B  79       3.888  23.570 -52.310  1.00  0.00           O  
ATOM   1803  CB  LYS B  79       5.852  23.911 -49.538  1.00  0.00           C  
ATOM   1804  CG  LYS B  79       5.377  25.352 -49.679  1.00  0.00           C  
ATOM   1805  CD  LYS B  79       6.264  26.305 -48.892  1.00  0.00           C  
ATOM   1806  CE  LYS B  79       5.803  27.747 -49.049  1.00  0.00           C  
ATOM   1807  NZ  LYS B  79       6.663  28.692 -48.286  1.00  0.00           N1+
ATOM   1808  N   GLU B  80       6.071  22.975 -52.411  1.00  0.00           N  
ATOM   1809  CA  GLU B  80       6.149  23.271 -53.864  1.00  0.00           C  
ATOM   1810  C   GLU B  80       6.956  22.186 -54.622  1.00  0.00           C  
ATOM   1811  O   GLU B  80       8.045  21.866 -54.171  1.00  0.00           O  
ATOM   1812  CB  GLU B  80       6.784  24.644 -54.093  1.00  0.00           C  
ATOM   1813  CG  GLU B  80       5.901  25.820 -53.699  1.00  0.00           C  
ATOM   1814  CD  GLU B  80       6.564  27.150 -53.923  1.00  0.00           C  
ATOM   1815  OE1 GLU B  80       7.729  27.166 -54.242  1.00  0.00           O  
ATOM   1816  OE2 GLU B  80       5.905  28.152 -53.773  1.00  0.00           O1-
ATOM   1817  N   VAL B  81       6.521  21.798 -55.863  1.00  0.00           N  
ATOM   1818  CA  VAL B  81       7.331  20.934 -56.677  1.00  0.00           C  
ATOM   1819  C   VAL B  81       7.421  21.566 -58.081  1.00  0.00           C  
ATOM   1820  O   VAL B  81       6.378  21.756 -58.729  1.00  0.00           O  
ATOM   1821  CB  VAL B  81       6.719  19.522 -56.751  1.00  0.00           C  
ATOM   1822  CG1 VAL B  81       7.570  18.619 -57.631  1.00  0.00           C  
ATOM   1823  CG2 VAL B  81       6.586  18.942 -55.351  1.00  0.00           C  
ATOM   1824  N   GLU B  82       8.630  21.754 -58.570  1.00  0.00           N  
ATOM   1825  CA  GLU B  82       8.897  22.518 -59.822  1.00  0.00           C  
ATOM   1826  C   GLU B  82      10.207  21.979 -60.580  1.00  0.00           C  
ATOM   1827  O   GLU B  82      11.212  21.623 -59.973  1.00  0.00           O  
ATOM   1828  CB  GLU B  82       9.045  24.006 -59.492  1.00  0.00           C  
ATOM   1829  CG  GLU B  82       9.209  24.906 -60.709  1.00  0.00           C  
ATOM   1830  CD  GLU B  82       9.327  26.361 -60.348  1.00  0.00           C  
ATOM   1831  OE1 GLU B  82       9.203  26.678 -59.190  1.00  0.00           O  
ATOM   1832  OE2 GLU B  82       9.542  27.156 -61.232  1.00  0.00           O1-
ATOM   1833  N   VAL B  83      10.015  21.895 -61.915  1.00  0.00           N  
ATOM   1834  CA  VAL B  83      11.135  21.614 -62.860  1.00  0.00           C  
ATOM   1835  C   VAL B  83      12.068  22.814 -63.010  1.00  0.00           C  
ATOM   1836  O   VAL B  83      11.616  23.947 -63.165  1.00  0.00           O  
ATOM   1837  CB  VAL B  83      10.588  21.237 -64.250  1.00  0.00           C  
ATOM   1838  CG1 VAL B  83      11.729  21.063 -65.242  1.00  0.00           C  
ATOM   1839  CG2 VAL B  83       9.760  19.965 -64.152  1.00  0.00           C  
ATOM   1840  N   LYS B  84      13.362  22.544 -62.827  1.00  0.00           N  
ATOM   1841  CA  LYS B  84      14.402  23.548 -62.976  1.00  0.00           C  
ATOM   1842  C   LYS B  84      15.394  23.039 -64.100  1.00  0.00           C  
ATOM   1843  O   LYS B  84      16.341  22.295 -63.758  1.00  0.00           O  
ATOM   1844  CB  LYS B  84      15.118  23.787 -61.646  1.00  0.00           C  
ATOM   1845  CG  LYS B  84      14.211  24.264 -60.519  1.00  0.00           C  
ATOM   1846  CD  LYS B  84      13.685  25.665 -60.790  1.00  0.00           C  
ATOM   1847  CE  LYS B  84      12.868  26.186 -59.616  1.00  0.00           C  
ATOM   1848  NZ  LYS B  84      12.327  27.548 -59.876  1.00  0.00           N1+
ATOM   1849  N   ASN B  85      15.209  23.431 -65.358  1.00  0.00           N  
ATOM   1850  CA  ASN B  85      16.004  23.103 -66.576  1.00  0.00           C  
ATOM   1851  C   ASN B  85      16.381  21.600 -66.897  1.00  0.00           C  
ATOM   1852  O   ASN B  85      17.498  21.305 -67.316  1.00  0.00           O  
ATOM   1853  CB  ASN B  85      17.280  23.925 -66.522  1.00  0.00           C  
ATOM   1854  CG  ASN B  85      17.018  25.403 -66.600  1.00  0.00           C  
ATOM   1855  ND2 ASN B  85      17.785  26.171 -65.869  1.00  0.00           N  
ATOM   1856  OD1 ASN B  85      16.121  25.850 -67.324  1.00  0.00           O  
ATOM   1857  N   GLY B  86      15.389  20.689 -66.626  1.00  0.00           N  
ATOM   1858  CA  GLY B  86      15.452  19.251 -66.673  1.00  0.00           C  
ATOM   1859  C   GLY B  86      15.612  18.498 -65.333  1.00  0.00           C  
ATOM   1860  O   GLY B  86      15.566  17.283 -65.381  1.00  0.00           O  
ATOM   1861  N   VAL B  87      15.771  19.201 -64.166  1.00  0.00           N  
ATOM   1862  CA  VAL B  87      15.845  18.628 -62.820  1.00  0.00           C  
ATOM   1863  C   VAL B  87      14.627  19.008 -62.001  1.00  0.00           C  
ATOM   1864  O   VAL B  87      14.406  20.186 -61.725  1.00  0.00           O  
ATOM   1865  CB  VAL B  87      17.115  19.113 -62.095  1.00  0.00           C  
ATOM   1866  CG1 VAL B  87      17.171  18.546 -60.684  1.00  0.00           C  
ATOM   1867  CG2 VAL B  87      18.349  18.711 -62.887  1.00  0.00           C  
ATOM   1868  N   VAL B  88      13.862  18.003 -61.516  1.00  0.00           N  
ATOM   1869  CA  VAL B  88      12.609  18.130 -60.686  1.00  0.00           C  
ATOM   1870  C   VAL B  88      12.901  18.304 -59.198  1.00  0.00           C  
ATOM   1871  O   VAL B  88      13.470  17.471 -58.596  1.00  0.00           O  
ATOM   1872  CB  VAL B  88      11.715  16.888 -60.860  1.00  0.00           C  
ATOM   1873  CG1 VAL B  88      10.471  17.001 -59.992  1.00  0.00           C  
ATOM   1874  CG2 VAL B  88      11.339  16.722 -62.324  1.00  0.00           C  
ATOM   1875  N   THR B  89      12.646  19.477 -58.672  1.00  0.00           N  
ATOM   1876  CA  THR B  89      12.921  19.863 -57.318  1.00  0.00           C  
ATOM   1877  C   THR B  89      11.669  19.793 -56.507  1.00  0.00           C  
ATOM   1878  O   THR B  89      10.555  19.983 -57.039  1.00  0.00           O  
ATOM   1879  CB  THR B  89      13.515  21.282 -57.244  1.00  0.00           C  
ATOM   1880  CG2 THR B  89      14.771  21.380 -58.096  1.00  0.00           C  
ATOM   1881  OG1 THR B  89      12.549  22.232 -57.712  1.00  0.00           O  
ATOM   1882  N   ALA B  90      11.769  19.669 -55.179  1.00  0.00           N  
ATOM   1883  CA  ALA B  90      10.700  19.599 -54.206  1.00  0.00           C  
ATOM   1884  C   ALA B  90      11.087  20.346 -52.908  1.00  0.00           C  
ATOM   1885  O   ALA B  90      12.118  20.091 -52.349  1.00  0.00           O  
ATOM   1886  CB  ALA B  90      10.256  18.087 -54.097  1.00  0.00           C  
ATOM   1887  N   THR B  91      10.274  21.319 -52.494  1.00  0.00           N  
ATOM   1888  CA  THR B  91      10.500  22.109 -51.238  1.00  0.00           C  
ATOM   1889  C   THR B  91       9.368  21.782 -50.152  1.00  0.00           C  
ATOM   1890  O   THR B  91       8.138  21.885 -50.444  1.00  0.00           O  
ATOM   1891  CB  THR B  91      10.529  23.618 -51.541  1.00  0.00           C  
ATOM   1892  CG2 THR B  91      10.723  24.416 -50.260  1.00  0.00           C  
ATOM   1893  OG1 THR B  91      11.603  23.907 -52.446  1.00  0.00           O  
ATOM   1894  N   MET B  92       9.729  21.584 -48.894  1.00  0.00           N  
ATOM   1895  CA  MET B  92       8.820  21.273 -47.760  1.00  0.00           C  
ATOM   1896  C   MET B  92       8.148  22.515 -47.019  1.00  0.00           C  
ATOM   1897  O   MET B  92       8.510  23.645 -47.129  1.00  0.00           O  
ATOM   1898  CB  MET B  92       9.600  20.431 -46.751  1.00  0.00           C  
ATOM   1899  CG  MET B  92      10.285  19.209 -47.347  1.00  0.00           C  
ATOM   1900  SD  MET B  92       9.123  18.074 -48.131  1.00  0.00           S  
ATOM   1901  CE  MET B  92       8.268  17.422 -46.699  1.00  0.00           C  
ATOM   1902  N   LEU B  93       7.007  22.357 -46.296  1.00  0.00           N  
ATOM   1903  CA  LEU B  93       6.366  23.398 -45.479  1.00  0.00           C  
ATOM   1904  C   LEU B  93       7.268  23.803 -44.264  1.00  0.00           C  
ATOM   1905  O   LEU B  93       8.042  22.993 -43.684  1.00  0.00           O  
ATOM   1906  CB  LEU B  93       5.003  22.900 -44.981  1.00  0.00           C  
ATOM   1907  CG  LEU B  93       3.931  22.706 -46.060  1.00  0.00           C  
ATOM   1908  CD1 LEU B  93       2.722  22.005 -45.456  1.00  0.00           C  
ATOM   1909  CD2 LEU B  93       3.545  24.059 -46.640  1.00  0.00           C  
ATOM   1910  N   SER B  94       7.214  25.070 -43.913  1.00  0.00           N  
ATOM   1911  CA  SER B  94       8.029  25.636 -42.773  1.00  0.00           C  
ATOM   1912  C   SER B  94       7.620  25.252 -41.381  1.00  0.00           C  
ATOM   1913  O   SER B  94       8.336  25.549 -40.391  1.00  0.00           O  
ATOM   1914  CB  SER B  94       8.016  27.151 -42.838  1.00  0.00           C  
ATOM   1915  OG  SER B  94       6.733  27.653 -42.584  1.00  0.00           O  
ATOM   1916  N   SER B  95       6.498  24.612 -41.201  1.00  0.00           N  
ATOM   1917  CA  SER B  95       5.920  24.130 -39.962  1.00  0.00           C  
ATOM   1918  C   SER B  95       5.301  22.727 -39.868  1.00  0.00           C  
ATOM   1919  O   SER B  95       4.613  22.339 -40.775  1.00  0.00           O  
ATOM   1920  CB  SER B  95       4.859  25.132 -39.553  1.00  0.00           C  
ATOM   1921  OG  SER B  95       4.197  24.716 -38.390  1.00  0.00           O  
ATOM   1922  N   GLY B  96       5.800  21.883 -38.923  1.00  0.00           N  
ATOM   1923  CA  GLY B  96       5.408  20.471 -38.676  1.00  0.00           C  
ATOM   1924  C   GLY B  96       6.243  19.424 -39.411  1.00  0.00           C  
ATOM   1925  O   GLY B  96       6.169  18.285 -39.036  1.00  0.00           O  
ATOM   1926  N   VAL B  97       6.993  19.792 -40.406  1.00  0.00           N  
ATOM   1927  CA  VAL B  97       7.800  18.824 -41.181  1.00  0.00           C  
ATOM   1928  C   VAL B  97       9.076  18.489 -40.359  1.00  0.00           C  
ATOM   1929  O   VAL B  97      10.084  19.132 -40.659  1.00  0.00           O  
ATOM   1930  CB  VAL B  97       8.188  19.404 -42.555  1.00  0.00           C  
ATOM   1931  CG1 VAL B  97       9.011  18.397 -43.344  1.00  0.00           C  
ATOM   1932  CG2 VAL B  97       6.935  19.797 -43.323  1.00  0.00           C  
ATOM   1933  N   ASN B  98       8.923  17.638 -39.322  1.00  0.00           N  
ATOM   1934  CA  ASN B  98       9.873  17.078 -38.466  1.00  0.00           C  
ATOM   1935  C   ASN B  98      10.255  18.090 -37.359  1.00  0.00           C  
ATOM   1936  O   ASN B  98       9.441  18.517 -36.535  1.00  0.00           O  
ATOM   1937  CB  ASN B  98      11.079  16.626 -39.269  1.00  0.00           C  
ATOM   1938  CG  ASN B  98      12.079  15.873 -38.437  1.00  0.00           C  
ATOM   1939  ND2 ASN B  98      11.833  14.604 -38.235  1.00  0.00           N  
ATOM   1940  OD1 ASN B  98      13.075  16.442 -37.975  1.00  0.00           O  
ATOM   1941  N   ASN B  99      11.495  18.554 -37.398  1.00  0.00           N  
ATOM   1942  CA  ASN B  99      12.303  19.414 -36.480  1.00  0.00           C  
ATOM   1943  C   ASN B  99      13.562  20.041 -37.175  1.00  0.00           C  
ATOM   1944  O   ASN B  99      13.706  21.264 -37.084  1.00  0.00           O  
ATOM   1945  CB  ASN B  99      12.720  18.617 -35.258  1.00  0.00           C  
ATOM   1946  CG  ASN B  99      13.452  19.453 -34.245  1.00  0.00           C  
ATOM   1947  ND2 ASN B  99      14.654  19.054 -33.918  1.00  0.00           N  
ATOM   1948  OD1 ASN B  99      12.927  20.461 -33.759  1.00  0.00           O  
ATOM   1949  N   GLU B 100      14.439  19.193 -37.789  1.00  0.00           N  
ATOM   1950  CA  GLU B 100      15.670  19.573 -38.517  1.00  0.00           C  
ATOM   1951  C   GLU B 100      15.483  19.910 -39.966  1.00  0.00           C  
ATOM   1952  O   GLU B 100      16.246  20.694 -40.556  1.00  0.00           O  
ATOM   1953  CB  GLU B 100      16.701  18.445 -38.422  1.00  0.00           C  
ATOM   1954  CG  GLU B 100      17.274  18.233 -37.028  1.00  0.00           C  
ATOM   1955  CD  GLU B 100      18.285  17.121 -36.974  1.00  0.00           C  
ATOM   1956  OE1 GLU B 100      17.950  16.021 -37.344  1.00  0.00           O  
ATOM   1957  OE2 GLU B 100      19.393  17.372 -36.563  1.00  0.00           O1-
ATOM   1958  N   ILE B 101      14.410  19.404 -40.631  1.00  0.00           N  
ATOM   1959  CA  ILE B 101      14.148  19.583 -42.109  1.00  0.00           C  
ATOM   1960  C   ILE B 101      12.864  20.454 -42.399  1.00  0.00           C  
ATOM   1961  O   ILE B 101      12.401  20.437 -43.520  1.00  0.00           O  
ATOM   1962  CB  ILE B 101      13.995  18.215 -42.798  1.00  0.00           C  
ATOM   1963  CG1 ILE B 101      12.832  17.433 -42.182  1.00  0.00           C  
ATOM   1964  CG2 ILE B 101      15.288  17.420 -42.696  1.00  0.00           C  
ATOM   1965  CD1 ILE B 101      12.457  16.187 -42.951  1.00  0.00           C  
ATOM   1966  N   LYS B 102      12.359  21.285 -41.511  1.00  0.00           N  
ATOM   1967  CA  LYS B 102      11.234  22.176 -41.829  1.00  0.00           C  
ATOM   1968  C   LYS B 102      11.587  23.201 -42.876  1.00  0.00           C  
ATOM   1969  O   LYS B 102      12.592  23.816 -42.771  1.00  0.00           O  
ATOM   1970  CB  LYS B 102      10.741  22.889 -40.569  1.00  0.00           C  
ATOM   1971  CG  LYS B 102      10.103  21.971 -39.536  1.00  0.00           C  
ATOM   1972  CD  LYS B 102       9.643  22.750 -38.313  1.00  0.00           C  
ATOM   1973  CE  LYS B 102       9.069  21.825 -37.250  1.00  0.00           C  
ATOM   1974  NZ  LYS B 102       8.656  22.569 -36.029  1.00  0.00           N1+
ATOM   1975  N   GLY B 103      10.820  23.327 -43.989  1.00  0.00           N  
ATOM   1976  CA  GLY B 103      11.113  24.254 -45.076  1.00  0.00           C  
ATOM   1977  C   GLY B 103      12.230  23.929 -46.017  1.00  0.00           C  
ATOM   1978  O   GLY B 103      12.525  24.728 -46.894  1.00  0.00           O  
ATOM   1979  N   LYS B 104      12.811  22.710 -45.957  1.00  0.00           N  
ATOM   1980  CA  LYS B 104      13.949  22.272 -46.738  1.00  0.00           C  
ATOM   1981  C   LYS B 104      13.613  21.575 -48.134  1.00  0.00           C  
ATOM   1982  O   LYS B 104      12.441  21.324 -48.442  1.00  0.00           O  
ATOM   1983  CB  LYS B 104      14.780  21.333 -45.863  1.00  0.00           C  
ATOM   1984  CG  LYS B 104      15.193  21.923 -44.521  1.00  0.00           C  
ATOM   1985  CD  LYS B 104      16.048  23.168 -44.706  1.00  0.00           C  
ATOM   1986  CE  LYS B 104      16.497  23.735 -43.367  1.00  0.00           C  
ATOM   1987  NZ  LYS B 104      17.198  25.039 -43.522  1.00  0.00           N1+
ATOM   1988  N   LYS B 105      14.663  21.274 -48.972  1.00  0.00           N  
ATOM   1989  CA  LYS B 105      14.508  20.771 -50.358  1.00  0.00           C  
ATOM   1990  C   LYS B 105      15.413  19.595 -50.744  1.00  0.00           C  
ATOM   1991  O   LYS B 105      16.390  19.206 -50.060  1.00  0.00           O  
ATOM   1992  CB  LYS B 105      14.744  21.917 -51.344  1.00  0.00           C  
ATOM   1993  CG  LYS B 105      16.107  22.584 -51.218  1.00  0.00           C  
ATOM   1994  CD  LYS B 105      16.224  23.781 -52.150  1.00  0.00           C  
ATOM   1995  CE  LYS B 105      17.553  24.499 -51.966  1.00  0.00           C  
ATOM   1996  NZ  LYS B 105      17.639  25.732 -52.795  1.00  0.00           N1+
ATOM   1997  N   LEU B 106      14.980  18.844 -51.785  1.00  0.00           N  
ATOM   1998  CA  LEU B 106      15.545  17.695 -52.529  1.00  0.00           C  
ATOM   1999  C   LEU B 106      15.393  17.959 -54.066  1.00  0.00           C  
ATOM   2000  O   LEU B 106      14.613  18.895 -54.429  1.00  0.00           O  
ATOM   2001  CB  LEU B 106      14.833  16.395 -52.132  1.00  0.00           C  
ATOM   2002  CG  LEU B 106      14.947  15.998 -50.655  1.00  0.00           C  
ATOM   2003  CD1 LEU B 106      14.024  14.821 -50.373  1.00  0.00           C  
ATOM   2004  CD2 LEU B 106      16.393  15.650 -50.333  1.00  0.00           C  
ATOM   2005  N   SER B 107      15.986  17.133 -54.958  1.00  0.00           N  
ATOM   2006  CA  SER B 107      15.903  17.142 -56.448  1.00  0.00           C  
ATOM   2007  C   SER B 107      16.017  15.714 -57.031  1.00  0.00           C  
ATOM   2008  O   SER B 107      16.430  14.732 -56.349  1.00  0.00           O  
ATOM   2009  CB  SER B 107      16.997  18.017 -57.029  1.00  0.00           C  
ATOM   2010  OG  SER B 107      18.246  17.390 -56.933  1.00  0.00           O  
ATOM   2011  N   LEU B 108      15.565  15.614 -58.290  1.00  0.00           N  
ATOM   2012  CA  LEU B 108      15.430  14.471 -59.165  1.00  0.00           C  
ATOM   2013  C   LEU B 108      15.986  14.830 -60.564  1.00  0.00           C  
ATOM   2014  O   LEU B 108      15.433  15.704 -61.269  1.00  0.00           O  
ATOM   2015  CB  LEU B 108      13.960  14.044 -59.259  1.00  0.00           C  
ATOM   2016  CG  LEU B 108      13.637  13.002 -60.337  1.00  0.00           C  
ATOM   2017  CD1 LEU B 108      14.346  11.695 -60.009  1.00  0.00           C  
ATOM   2018  CD2 LEU B 108      12.131  12.801 -60.415  1.00  0.00           C  
ATOM   2019  N   TRP B 109      16.939  13.991 -61.023  1.00  0.00           N  
ATOM   2020  CA  TRP B 109      17.671  14.232 -62.286  1.00  0.00           C  
ATOM   2021  C   TRP B 109      17.968  12.914 -62.994  1.00  0.00           C  
ATOM   2022  O   TRP B 109      17.584  11.833 -62.548  1.00  0.00           O  
ATOM   2023  CB  TRP B 109      18.982  14.975 -62.023  1.00  0.00           C  
ATOM   2024  CG  TRP B 109      19.954  14.197 -61.189  1.00  0.00           C  
ATOM   2025  CD1 TRP B 109      20.998  13.446 -61.642  1.00  0.00           C  
ATOM   2026  CD2 TRP B 109      19.979  14.090 -59.745  1.00  0.00           C  
ATOM   2027  CE2 TRP B 109      21.058  13.264 -59.417  1.00  0.00           C  
ATOM   2028  CE3 TRP B 109      19.185  14.620 -58.721  1.00  0.00           C  
ATOM   2029  NE1 TRP B 109      21.667  12.880 -60.585  1.00  0.00           N  
ATOM   2030  CZ2 TRP B 109      21.368  12.950 -58.103  1.00  0.00           C  
ATOM   2031  CZ3 TRP B 109      19.497  14.306 -57.403  1.00  0.00           C  
ATOM   2032  CH2 TRP B 109      20.561  13.493 -57.103  1.00  0.00           C  
ATOM   2033  N   ALA B 110      18.670  13.020 -64.141  1.00  0.00           N  
ATOM   2034  CA  ALA B 110      18.863  11.895 -65.017  1.00  0.00           C  
ATOM   2035  C   ALA B 110      19.992  12.038 -66.061  1.00  0.00           C  
ATOM   2036  O   ALA B 110      20.566  13.117 -66.192  1.00  0.00           O  
ATOM   2037  CB  ALA B 110      17.479  11.579 -65.748  1.00  0.00           C  
ATOM   2038  N   ARG B 111      20.345  10.922 -66.743  1.00  0.00           N  
ATOM   2039  CA  ARG B 111      21.283  10.809 -67.835  1.00  0.00           C  
ATOM   2040  C   ARG B 111      20.466  10.335 -69.114  1.00  0.00           C  
ATOM   2041  O   ARG B 111      19.375   9.742 -68.979  1.00  0.00           O  
ATOM   2042  CB  ARG B 111      22.391   9.826 -67.489  1.00  0.00           C  
ATOM   2043  CG  ARG B 111      23.175  10.162 -66.230  1.00  0.00           C  
ATOM   2044  CD  ARG B 111      24.213  11.192 -66.488  1.00  0.00           C  
ATOM   2045  NE  ARG B 111      25.014  11.463 -65.305  1.00  0.00           N  
ATOM   2046  CZ  ARG B 111      26.007  12.372 -65.245  1.00  0.00           C  
ATOM   2047  NH1 ARG B 111      26.308  13.087 -66.306  1.00  0.00           N1+
ATOM   2048  NH2 ARG B 111      26.677  12.545 -64.119  1.00  0.00           N  
ATOM   2049  N   ARG B 112      20.974  10.741 -70.235  1.00  0.00           N  
ATOM   2050  CA  ARG B 112      20.465  10.464 -71.613  1.00  0.00           C  
ATOM   2051  C   ARG B 112      20.803   9.044 -72.081  1.00  0.00           C  
ATOM   2052  O   ARG B 112      21.999   8.846 -72.236  1.00  0.00           O  
ATOM   2053  CB  ARG B 112      21.044  11.457 -72.610  1.00  0.00           C  
ATOM   2054  CG  ARG B 112      20.423  11.405 -73.997  1.00  0.00           C  
ATOM   2055  CD  ARG B 112      21.155  12.270 -74.959  1.00  0.00           C  
ATOM   2056  NE  ARG B 112      20.468  12.361 -76.237  1.00  0.00           N  
ATOM   2057  CZ  ARG B 112      19.700  13.399 -76.621  1.00  0.00           C  
ATOM   2058  NH1 ARG B 112      19.531  14.424 -75.815  1.00  0.00           N1+
ATOM   2059  NH2 ARG B 112      19.117  13.387 -77.807  1.00  0.00           N  
ATOM   2060  N   GLU B 113      19.824   8.217 -72.322  1.00  0.00           N  
ATOM   2061  CA  GLU B 113      20.078   6.773 -72.777  1.00  0.00           C  
ATOM   2062  C   GLU B 113      19.828   6.636 -74.292  1.00  0.00           C  
ATOM   2063  O   GLU B 113      20.047   5.593 -74.867  1.00  0.00           O  
ATOM   2064  CB  GLU B 113      19.181   5.783 -72.029  1.00  0.00           C  
ATOM   2065  CG  GLU B 113      19.403   5.748 -70.524  1.00  0.00           C  
ATOM   2066  CD  GLU B 113      20.776   5.266 -70.146  1.00  0.00           C  
ATOM   2067  OE1 GLU B 113      21.267   4.368 -70.788  1.00  0.00           O  
ATOM   2068  OE2 GLU B 113      21.335   5.796 -69.215  1.00  0.00           O1-
ATOM   2069  N   ASN B 114      19.491   7.695 -75.018  1.00  0.00           N  
ATOM   2070  CA  ASN B 114      19.163   7.713 -76.506  1.00  0.00           C  
ATOM   2071  C   ASN B 114      18.113   6.687 -76.961  1.00  0.00           C  
ATOM   2072  O   ASN B 114      18.443   5.852 -77.762  1.00  0.00           O  
ATOM   2073  CB  ASN B 114      20.425   7.512 -77.324  1.00  0.00           C  
ATOM   2074  CG  ASN B 114      21.358   8.689 -77.248  1.00  0.00           C  
ATOM   2075  ND2 ASN B 114      22.638   8.419 -77.215  1.00  0.00           N  
ATOM   2076  OD1 ASN B 114      20.918   9.844 -77.220  1.00  0.00           O  
ATOM   2077  N   GLY B 115      17.007   6.666 -76.212  1.00  0.00           N  
ATOM   2078  CA  GLY B 115      15.922   5.753 -76.380  1.00  0.00           C  
ATOM   2079  C   GLY B 115      14.962   5.904 -75.212  1.00  0.00           C  
ATOM   2080  O   GLY B 115      13.769   5.931 -75.326  1.00  0.00           O  
ATOM   2081  N   SER B 116      15.454   6.156 -73.932  1.00  0.00           N  
ATOM   2082  CA  SER B 116      14.768   6.413 -72.681  1.00  0.00           C  
ATOM   2083  C   SER B 116      15.678   7.294 -71.850  1.00  0.00           C  
ATOM   2084  O   SER B 116      16.626   7.925 -72.341  1.00  0.00           O  
ATOM   2085  CB  SER B 116      14.450   5.123 -71.951  1.00  0.00           C  
ATOM   2086  OG  SER B 116      13.634   5.363 -70.838  1.00  0.00           O  
ATOM   2087  N   VAL B 117      15.287   7.515 -70.585  1.00  0.00           N  
ATOM   2088  CA  VAL B 117      16.029   8.385 -69.658  1.00  0.00           C  
ATOM   2089  C   VAL B 117      16.219   7.705 -68.230  1.00  0.00           C  
ATOM   2090  O   VAL B 117      15.243   7.280 -67.666  1.00  0.00           O  
ATOM   2091  CB  VAL B 117      15.282   9.724 -69.508  1.00  0.00           C  
ATOM   2092  CG1 VAL B 117      15.967  10.603 -68.472  1.00  0.00           C  
ATOM   2093  CG2 VAL B 117      15.211  10.431 -70.853  1.00  0.00           C  
ATOM   2094  N   LYS B 118      17.442   7.735 -67.715  1.00  0.00           N  
ATOM   2095  CA  LYS B 118      17.886   7.064 -66.478  1.00  0.00           C  
ATOM   2096  C   LYS B 118      17.822   8.022 -65.288  1.00  0.00           C  
ATOM   2097  O   LYS B 118      18.702   8.903 -65.221  1.00  0.00           O  
ATOM   2098  CB  LYS B 118      19.305   6.517 -66.636  1.00  0.00           C  
ATOM   2099  CG  LYS B 118      19.793   5.684 -65.458  1.00  0.00           C  
ATOM   2100  CD  LYS B 118      21.189   5.135 -65.710  1.00  0.00           C  
ATOM   2101  CE  LYS B 118      21.632   4.209 -64.586  1.00  0.00           C  
ATOM   2102  NZ  LYS B 118      23.003   3.676 -64.812  1.00  0.00           N1+
ATOM   2103  N   TRP B 119      16.789   7.874 -64.454  1.00  0.00           N  
ATOM   2104  CA  TRP B 119      16.573   8.843 -63.334  1.00  0.00           C  
ATOM   2105  C   TRP B 119      17.189   8.525 -61.950  1.00  0.00           C  
ATOM   2106  O   TRP B 119      17.340   7.334 -61.635  1.00  0.00           O  
ATOM   2107  CB  TRP B 119      15.068   9.028 -63.135  1.00  0.00           C  
ATOM   2108  CG  TRP B 119      14.402   9.767 -64.257  1.00  0.00           C  
ATOM   2109  CD1 TRP B 119      13.819   9.219 -65.360  1.00  0.00           C  
ATOM   2110  CD2 TRP B 119      14.248  11.201 -64.391  1.00  0.00           C  
ATOM   2111  CE2 TRP B 119      13.567  11.427 -65.590  1.00  0.00           C  
ATOM   2112  CE3 TRP B 119      14.626  12.293 -63.601  1.00  0.00           C  
ATOM   2113  NE1 TRP B 119      13.315  10.208 -66.169  1.00  0.00           N  
ATOM   2114  CZ2 TRP B 119      13.255  12.705 -66.027  1.00  0.00           C  
ATOM   2115  CZ3 TRP B 119      14.312  13.574 -64.038  1.00  0.00           C  
ATOM   2116  CH2 TRP B 119      13.643  13.774 -65.219  1.00  0.00           C  
ATOM   2117  N   PHE B 120      17.615   9.552 -61.228  1.00  0.00           N  
ATOM   2118  CA  PHE B 120      18.285   9.443 -59.876  1.00  0.00           C  
ATOM   2119  C   PHE B 120      17.656  10.309 -58.754  1.00  0.00           C  
ATOM   2120  O   PHE B 120      17.302  11.446 -58.986  1.00  0.00           O  
ATOM   2121  CB  PHE B 120      19.762   9.820 -60.000  1.00  0.00           C  
ATOM   2122  CG  PHE B 120      20.508   9.020 -61.029  1.00  0.00           C  
ATOM   2123  CD1 PHE B 120      20.639   9.486 -62.329  1.00  0.00           C  
ATOM   2124  CD2 PHE B 120      21.079   7.799 -60.701  1.00  0.00           C  
ATOM   2125  CE1 PHE B 120      21.325   8.750 -63.277  1.00  0.00           C  
ATOM   2126  CE2 PHE B 120      21.766   7.063 -61.646  1.00  0.00           C  
ATOM   2127  CZ  PHE B 120      21.888   7.539 -62.936  1.00  0.00           C  
ATOM   2128  N   CYS B 121      17.497   9.827 -57.563  1.00  0.00           N  
ATOM   2129  CA  CYS B 121      16.710  10.461 -56.436  1.00  0.00           C  
ATOM   2130  C   CYS B 121      17.611  10.879 -55.250  1.00  0.00           C  
ATOM   2131  O   CYS B 121      18.167  10.001 -54.623  1.00  0.00           O  
ATOM   2132  CB  CYS B 121      15.640   9.502 -55.916  1.00  0.00           C  
ATOM   2133  SG  CYS B 121      14.397   9.044 -57.148  1.00  0.00           S  
ATOM   2134  N   GLY B 122      17.857  12.188 -54.911  1.00  0.00           N  
ATOM   2135  CA  GLY B 122      18.698  12.625 -53.840  1.00  0.00           C  
ATOM   2136  C   GLY B 122      18.597  14.084 -53.442  1.00  0.00           C  
ATOM   2137  O   GLY B 122      17.508  14.694 -53.362  1.00  0.00           O  
ATOM   2138  N   GLN B 123      19.721  14.678 -53.159  1.00  0.00           N  
ATOM   2139  CA  GLN B 123      19.807  16.041 -52.658  1.00  0.00           C  
ATOM   2140  C   GLN B 123      19.667  17.052 -53.846  1.00  0.00           C  
ATOM   2141  O   GLN B 123      19.806  16.658 -54.998  1.00  0.00           O  
ATOM   2142  CB  GLN B 123      21.129  16.250 -51.914  1.00  0.00           C  
ATOM   2143  CG  GLN B 123      21.239  15.479 -50.611  1.00  0.00           C  
ATOM   2144  CD  GLN B 123      22.513  15.800 -49.853  1.00  0.00           C  
ATOM   2145  NE2 GLN B 123      22.365  16.238 -48.608  1.00  0.00           N  
ATOM   2146  OE1 GLN B 123      23.619  15.657 -50.381  1.00  0.00           O  
ATOM   2147  N   PRO B 124      19.505  18.308 -53.540  1.00  0.00           N  
ATOM   2148  CA  PRO B 124      19.363  19.377 -54.571  1.00  0.00           C  
ATOM   2149  C   PRO B 124      20.538  19.519 -55.514  1.00  0.00           C  
ATOM   2150  O   PRO B 124      21.614  19.872 -55.051  1.00  0.00           O  
ATOM   2151  CB  PRO B 124      19.206  20.643 -53.722  1.00  0.00           C  
ATOM   2152  CG  PRO B 124      18.583  20.159 -52.456  1.00  0.00           C  
ATOM   2153  CD  PRO B 124      19.260  18.842 -52.186  1.00  0.00           C  
ATOM   2154  N   VAL B 125      20.333  19.326 -56.827  1.00  0.00           N  
ATOM   2155  CA  VAL B 125      21.257  19.706 -57.849  1.00  0.00           C  
ATOM   2156  C   VAL B 125      20.647  20.576 -58.944  1.00  0.00           C  
ATOM   2157  O   VAL B 125      19.407  20.685 -59.080  1.00  0.00           O  
ATOM   2158  CB  VAL B 125      21.852  18.436 -58.486  1.00  0.00           C  
ATOM   2159  CG1 VAL B 125      22.543  17.586 -57.430  1.00  0.00           C  
ATOM   2160  CG2 VAL B 125      20.756  17.645 -59.183  1.00  0.00           C  
ATOM   2161  N   THR B 126      21.470  21.191 -59.756  1.00  0.00           N  
ATOM   2162  CA  THR B 126      21.211  22.005 -60.898  1.00  0.00           C  
ATOM   2163  C   THR B 126      21.766  21.290 -62.249  1.00  0.00           C  
ATOM   2164  O   THR B 126      22.711  20.555 -62.147  1.00  0.00           O  
ATOM   2165  CB  THR B 126      21.842  23.394 -60.688  1.00  0.00           C  
ATOM   2166  CG2 THR B 126      21.244  24.071 -59.464  1.00  0.00           C  
ATOM   2167  OG1 THR B 126      23.258  23.256 -60.510  1.00  0.00           O  
ATOM   2168  N   ARG B 127      21.101  21.587 -63.427  1.00  0.00           N  
ATOM   2169  CA  ARG B 127      21.517  20.969 -64.718  1.00  0.00           C  
ATOM   2170  C   ARG B 127      22.580  21.744 -65.497  1.00  0.00           C  
ATOM   2171  O   ARG B 127      22.293  22.751 -66.079  1.00  0.00           O  
ATOM   2172  CB  ARG B 127      20.306  20.795 -65.622  1.00  0.00           C  
ATOM   2173  CG  ARG B 127      20.576  20.042 -66.915  1.00  0.00           C  
ATOM   2174  CD  ARG B 127      20.764  18.588 -66.676  1.00  0.00           C  
ATOM   2175  NE  ARG B 127      19.519  17.935 -66.304  1.00  0.00           N  
ATOM   2176  CZ  ARG B 127      19.391  16.617 -66.054  1.00  0.00           C  
ATOM   2177  NH1 ARG B 127      20.439  15.828 -66.141  1.00  0.00           N1+
ATOM   2178  NH2 ARG B 127      18.213  16.119 -65.722  1.00  0.00           N  
ATOM   2179  N   THR B 128      23.775  21.259 -65.587  1.00  0.00           N  
ATOM   2180  CA  THR B 128      24.843  21.956 -66.317  1.00  0.00           C  
ATOM   2181  C   THR B 128      24.814  21.847 -67.792  1.00  0.00           C  
ATOM   2182  O   THR B 128      24.876  22.824 -68.535  1.00  0.00           O  
ATOM   2183  CB  THR B 128      26.226  21.464 -65.849  1.00  0.00           C  
ATOM   2184  CG2 THR B 128      27.331  22.159 -66.630  1.00  0.00           C  
ATOM   2185  OG1 THR B 128      26.386  21.741 -64.452  1.00  0.00           O  
ATOM   2186  N   ASP B 129      24.618  20.587 -68.243  1.00  0.00           N  
ATOM   2187  CA  ASP B 129      24.480  20.292 -69.687  1.00  0.00           C  
ATOM   2188  C   ASP B 129      23.477  19.107 -69.946  1.00  0.00           C  
ATOM   2189  O   ASP B 129      22.760  18.604 -69.061  1.00  0.00           O  
ATOM   2190  CB  ASP B 129      25.849  19.960 -70.286  1.00  0.00           C  
ATOM   2191  CG  ASP B 129      26.451  18.683 -69.716  1.00  0.00           C  
ATOM   2192  OD1 ASP B 129      25.705  17.783 -69.410  1.00  0.00           O  
ATOM   2193  OD2 ASP B 129      27.651  18.619 -69.592  1.00  0.00           O1-
ATOM   2194  N   ASP B 130      23.457  18.595 -71.206  1.00  0.00           N  
ATOM   2195  CA  ASP B 130      22.565  17.527 -71.661  1.00  0.00           C  
ATOM   2196  C   ASP B 130      22.578  16.221 -70.785  1.00  0.00           C  
ATOM   2197  O   ASP B 130      21.583  15.507 -70.846  1.00  0.00           O  
ATOM   2198  CB  ASP B 130      22.924  17.172 -73.106  1.00  0.00           C  
ATOM   2199  CG  ASP B 130      22.527  18.257 -74.098  1.00  0.00           C  
ATOM   2200  OD1 ASP B 130      21.835  19.167 -73.708  1.00  0.00           O  
ATOM   2201  OD2 ASP B 130      22.920  18.165 -75.237  1.00  0.00           O1-
ATOM   2202  N   ASP B 131      23.617  15.942 -69.977  1.00  0.00           N  
ATOM   2203  CA  ASP B 131      23.703  14.792 -69.073  1.00  0.00           C  
ATOM   2204  C   ASP B 131      24.119  15.126 -67.606  1.00  0.00           C  
ATOM   2205  O   ASP B 131      23.591  14.544 -66.647  1.00  0.00           O  
ATOM   2206  CB  ASP B 131      24.690  13.778 -69.656  1.00  0.00           C  
ATOM   2207  CG  ASP B 131      24.167  13.099 -70.915  1.00  0.00           C  
ATOM   2208  OD1 ASP B 131      23.159  12.437 -70.834  1.00  0.00           O  
ATOM   2209  OD2 ASP B 131      24.780  13.248 -71.944  1.00  0.00           O1-
ATOM   2210  N   THR B 132      24.973  16.119 -67.408  1.00  0.00           N  
ATOM   2211  CA  THR B 132      25.589  16.479 -66.083  1.00  0.00           C  
ATOM   2212  C   THR B 132      24.940  17.542 -65.228  1.00  0.00           C  
ATOM   2213  O   THR B 132      24.716  18.644 -65.710  1.00  0.00           O  
ATOM   2214  CB  THR B 132      27.050  16.919 -66.291  1.00  0.00           C  
ATOM   2215  CG2 THR B 132      27.661  17.375 -64.975  1.00  0.00           C  
ATOM   2216  OG1 THR B 132      27.812  15.824 -66.814  1.00  0.00           O  
ATOM   2217  N   VAL B 133      24.852  17.373 -64.013  1.00  0.00           N  
ATOM   2218  CA  VAL B 133      24.388  18.235 -62.922  1.00  0.00           C  
ATOM   2219  C   VAL B 133      25.416  18.718 -61.785  1.00  0.00           C  
ATOM   2220  O   VAL B 133      26.426  18.053 -61.648  1.00  0.00           O  
ATOM   2221  CB  VAL B 133      23.225  17.488 -62.242  1.00  0.00           C  
ATOM   2222  CG1 VAL B 133      22.092  17.253 -63.231  1.00  0.00           C  
ATOM   2223  CG2 VAL B 133      23.721  16.171 -61.667  1.00  0.00           C  
ATOM   2224  N   ALA B 134      25.127  19.676 -60.904  1.00  0.00           N  
ATOM   2225  CA  ALA B 134      26.036  20.168 -59.881  1.00  0.00           C  
ATOM   2226  C   ALA B 134      25.299  20.356 -58.517  1.00  0.00           C  
ATOM   2227  O   ALA B 134      24.038  20.617 -58.478  1.00  0.00           O  
ATOM   2228  CB  ALA B 134      26.745  21.433 -60.336  1.00  0.00           C  
ATOM   2229  N   ASP B 135      26.125  20.179 -57.457  1.00  0.00           N  
ATOM   2230  CA  ASP B 135      25.561  20.233 -56.076  1.00  0.00           C  
ATOM   2231  C   ASP B 135      25.006  21.618 -55.542  1.00  0.00           C  
ATOM   2232  O   ASP B 135      25.831  22.398 -55.085  1.00  0.00           O  
ATOM   2233  CB  ASP B 135      26.638  19.741 -55.106  1.00  0.00           C  
ATOM   2234  CG  ASP B 135      26.146  19.658 -53.667  1.00  0.00           C  
ATOM   2235  OD1 ASP B 135      25.094  20.182 -53.389  1.00  0.00           O  
ATOM   2236  OD2 ASP B 135      26.827  19.071 -52.861  1.00  0.00           O1-
ATOM   2237  N   ALA B 136      23.678  21.816 -55.465  1.00  0.00           N  
ATOM   2238  CA  ALA B 136      23.050  23.097 -55.063  1.00  0.00           C  
ATOM   2239  C   ALA B 136      22.926  23.270 -53.535  1.00  0.00           C  
ATOM   2240  O   ALA B 136      21.854  23.287 -52.947  1.00  0.00           O  
ATOM   2241  CB  ALA B 136      21.655  23.181 -55.633  1.00  0.00           C  
ATOM   2242  N   LYS B 137      24.127  23.231 -52.842  1.00  0.00           N  
ATOM   2243  CA  LYS B 137      24.218  23.415 -51.387  1.00  0.00           C  
ATOM   2244  C   LYS B 137      24.155  24.852 -50.948  1.00  0.00           C  
ATOM   2245  O   LYS B 137      24.964  25.674 -51.314  1.00  0.00           O  
ATOM   2246  CB  LYS B 137      25.509  22.791 -50.856  1.00  0.00           C  
ATOM   2247  CG  LYS B 137      25.650  22.832 -49.340  1.00  0.00           C  
ATOM   2248  CD  LYS B 137      26.844  22.013 -48.874  1.00  0.00           C  
ATOM   2249  CE  LYS B 137      26.954  22.006 -47.356  1.00  0.00           C  
ATOM   2250  NZ  LYS B 137      25.819  21.284 -46.720  1.00  0.00           N1+
ATOM   2251  N   ASP B 138      23.171  25.135 -50.037  1.00  0.00           N  
ATOM   2252  CA  ASP B 138      22.994  26.565 -49.589  1.00  0.00           C  
ATOM   2253  C   ASP B 138      22.415  26.788 -48.159  1.00  0.00           C  
ATOM   2254  O   ASP B 138      22.158  27.954 -47.756  1.00  0.00           O  
ATOM   2255  CB  ASP B 138      22.090  27.296 -50.585  1.00  0.00           C  
ATOM   2256  CG  ASP B 138      20.705  26.673 -50.695  1.00  0.00           C  
ATOM   2257  OD1 ASP B 138      20.346  25.913 -49.827  1.00  0.00           O  
ATOM   2258  OD2 ASP B 138      20.019  26.963 -51.646  1.00  0.00           O1-
ATOM   2259  N   GLY B 139      22.156  25.696 -47.493  1.00  0.00           N  
ATOM   2260  CA  GLY B 139      21.566  25.731 -46.130  1.00  0.00           C  
ATOM   2261  C   GLY B 139      20.135  25.286 -46.080  1.00  0.00           C  
ATOM   2262  O   GLY B 139      19.611  25.153 -44.974  1.00  0.00           O  
ATOM   2263  N   LYS B 140      19.380  25.161 -47.234  1.00  0.00           N  
ATOM   2264  CA  LYS B 140      17.972  24.686 -47.255  1.00  0.00           C  
ATOM   2265  C   LYS B 140      17.818  23.275 -47.773  1.00  0.00           C  
ATOM   2266  O   LYS B 140      16.723  22.834 -47.933  1.00  0.00           O  
ATOM   2267  CB  LYS B 140      17.105  25.621 -48.101  1.00  0.00           C  
ATOM   2268  CG  LYS B 140      16.962  27.028 -47.537  1.00  0.00           C  
ATOM   2269  CD  LYS B 140      16.056  27.884 -48.410  1.00  0.00           C  
ATOM   2270  CE  LYS B 140      15.900  29.286 -47.840  1.00  0.00           C  
ATOM   2271  NZ  LYS B 140      15.041  30.144 -48.701  1.00  0.00           N1+
ATOM   2272  N   GLU B 141      18.943  22.643 -48.077  1.00  0.00           N  
ATOM   2273  CA  GLU B 141      18.931  21.318 -48.592  1.00  0.00           C  
ATOM   2274  C   GLU B 141      18.649  20.365 -47.440  1.00  0.00           C  
ATOM   2275  O   GLU B 141      19.065  20.683 -46.302  1.00  0.00           O  
ATOM   2276  CB  GLU B 141      20.263  20.986 -49.268  1.00  0.00           C  
ATOM   2277  CG  GLU B 141      21.434  20.831 -48.308  1.00  0.00           C  
ATOM   2278  CD  GLU B 141      22.106  22.137 -47.989  1.00  0.00           C  
ATOM   2279  OE1 GLU B 141      21.669  23.146 -48.489  1.00  0.00           O  
ATOM   2280  OE2 GLU B 141      23.056  22.127 -47.243  1.00  0.00           O1-
ATOM   2281  N   ILE B 142      18.005  19.228 -47.645  1.00  0.00           N  
ATOM   2282  CA  ILE B 142      17.824  18.184 -46.574  1.00  0.00           C  
ATOM   2283  C   ILE B 142      19.148  17.295 -46.548  1.00  0.00           C  
ATOM   2284  O   ILE B 142      19.595  16.827 -47.556  1.00  0.00           O  
ATOM   2285  CB  ILE B 142      16.584  17.309 -46.835  1.00  0.00           C  
ATOM   2286  CG1 ILE B 142      15.307  18.145 -46.719  1.00  0.00           C  
ATOM   2287  CG2 ILE B 142      16.547  16.137 -45.866  1.00  0.00           C  
ATOM   2288  CD1 ILE B 142      14.053  17.402 -47.117  1.00  0.00           C  
ATOM   2289  N   ASP B 143      19.712  17.165 -45.361  1.00  0.00           N  
ATOM   2290  CA  ASP B 143      20.880  16.284 -45.070  1.00  0.00           C  
ATOM   2291  C   ASP B 143      20.415  14.839 -45.142  1.00  0.00           C  
ATOM   2292  O   ASP B 143      19.325  14.539 -44.676  1.00  0.00           O  
ATOM   2293  CB  ASP B 143      21.480  16.570 -43.691  1.00  0.00           C  
ATOM   2294  CG  ASP B 143      22.755  15.783 -43.425  1.00  0.00           C  
ATOM   2295  OD1 ASP B 143      22.659  14.612 -43.140  1.00  0.00           O  
ATOM   2296  OD2 ASP B 143      23.814  16.359 -43.508  1.00  0.00           O1-
ATOM   2297  N   THR B 144      21.197  13.901 -45.709  1.00  0.00           N  
ATOM   2298  CA  THR B 144      20.832  12.481 -45.820  1.00  0.00           C  
ATOM   2299  C   THR B 144      20.397  11.705 -44.519  1.00  0.00           C  
ATOM   2300  O   THR B 144      19.812  10.628 -44.561  1.00  0.00           O  
ATOM   2301  CB  THR B 144      22.013  11.729 -46.461  1.00  0.00           C  
ATOM   2302  CG2 THR B 144      22.284  12.258 -47.862  1.00  0.00           C  
ATOM   2303  OG1 THR B 144      23.185  11.900 -45.655  1.00  0.00           O  
ATOM   2304  N   LYS B 145      20.724  12.366 -43.323  1.00  0.00           N  
ATOM   2305  CA  LYS B 145      20.270  11.791 -42.049  1.00  0.00           C  
ATOM   2306  C   LYS B 145      18.723  11.628 -41.924  1.00  0.00           C  
ATOM   2307  O   LYS B 145      18.375  10.842 -41.070  1.00  0.00           O  
ATOM   2308  CB  LYS B 145      20.790  12.652 -40.897  1.00  0.00           C  
ATOM   2309  CG  LYS B 145      20.098  14.002 -40.758  1.00  0.00           C  
ATOM   2310  CD  LYS B 145      20.753  14.850 -39.678  1.00  0.00           C  
ATOM   2311  CE  LYS B 145      20.599  14.215 -38.304  1.00  0.00           C  
ATOM   2312  NZ  LYS B 145      21.106  15.101 -37.221  1.00  0.00           N1+
ATOM   2313  N   HIS B 146      17.936  12.284 -42.740  1.00  0.00           N  
ATOM   2314  CA  HIS B 146      16.405  12.008 -42.719  1.00  0.00           C  
ATOM   2315  C   HIS B 146      15.909  11.466 -44.107  1.00  0.00           C  
ATOM   2316  O   HIS B 146      14.696  11.468 -44.334  1.00  0.00           O  
ATOM   2317  CB  HIS B 146      15.612  13.271 -42.366  1.00  0.00           C  
ATOM   2318  CG  HIS B 146      15.806  13.729 -40.954  1.00  0.00           C  
ATOM   2319  CD2 HIS B 146      16.488  14.782 -40.444  1.00  0.00           C  
ATOM   2320  ND1 HIS B 146      15.257  13.068 -39.876  1.00  0.00           N  
ATOM   2321  CE1 HIS B 146      15.594  13.695 -38.762  1.00  0.00           C  
ATOM   2322  NE2 HIS B 146      16.339  14.737 -39.079  1.00  0.00           N  
ATOM   2323  N   LEU B 147      16.829  10.899 -44.993  1.00  0.00           N  
ATOM   2324  CA  LEU B 147      16.428  10.399 -46.296  1.00  0.00           C  
ATOM   2325  C   LEU B 147      16.534   8.835 -46.336  1.00  0.00           C  
ATOM   2326  O   LEU B 147      17.485   8.219 -45.829  1.00  0.00           O  
ATOM   2327  CB  LEU B 147      17.305  11.029 -47.385  1.00  0.00           C  
ATOM   2328  CG  LEU B 147      17.282  12.561 -47.455  1.00  0.00           C  
ATOM   2329  CD1 LEU B 147      18.213  13.034 -48.563  1.00  0.00           C  
ATOM   2330  CD2 LEU B 147      15.858  13.038 -47.697  1.00  0.00           C  
ATOM   2331  N   PRO B 148      15.584   8.125 -46.984  1.00  0.00           N  
ATOM   2332  CA  PRO B 148      15.545   6.703 -47.287  1.00  0.00           C  
ATOM   2333  C   PRO B 148      16.859   6.303 -48.041  1.00  0.00           C  
ATOM   2334  O   PRO B 148      17.479   7.061 -48.773  1.00  0.00           O  
ATOM   2335  CB  PRO B 148      14.299   6.575 -48.170  1.00  0.00           C  
ATOM   2336  CG  PRO B 148      13.437   7.717 -47.753  1.00  0.00           C  
ATOM   2337  CD  PRO B 148      14.404   8.839 -47.486  1.00  0.00           C  
ATOM   2338  N   SER B 149      17.244   5.046 -47.897  1.00  0.00           N  
ATOM   2339  CA  SER B 149      18.503   4.431 -48.417  1.00  0.00           C  
ATOM   2340  C   SER B 149      18.566   4.534 -49.969  1.00  0.00           C  
ATOM   2341  O   SER B 149      19.668   4.528 -50.579  1.00  0.00           O  
ATOM   2342  CB  SER B 149      18.594   2.978 -47.993  1.00  0.00           C  
ATOM   2343  OG  SER B 149      17.598   2.211 -48.611  1.00  0.00           O  
ATOM   2344  N   THR B 150      17.349   4.651 -50.588  1.00  0.00           N  
ATOM   2345  CA  THR B 150      17.142   4.755 -52.044  1.00  0.00           C  
ATOM   2346  C   THR B 150      16.970   6.221 -52.519  1.00  0.00           C  
ATOM   2347  O   THR B 150      16.765   6.398 -53.697  1.00  0.00           O  
ATOM   2348  CB  THR B 150      15.916   3.929 -52.476  1.00  0.00           C  
ATOM   2349  CG2 THR B 150      16.100   2.466 -52.102  1.00  0.00           C  
ATOM   2350  OG1 THR B 150      14.742   4.440 -51.832  1.00  0.00           O  
ATOM   2351  N   CYS B 151      17.078   7.123 -51.589  1.00  0.00           N  
ATOM   2352  CA  CYS B 151      16.884   8.570 -51.883  1.00  0.00           C  
ATOM   2353  C   CYS B 151      18.004   9.448 -51.410  1.00  0.00           C  
ATOM   2354  O   CYS B 151      17.870  10.562 -50.870  1.00  0.00           O  
ATOM   2355  CB  CYS B 151      15.593   9.081 -51.243  1.00  0.00           C  
ATOM   2356  SG  CYS B 151      14.097   8.258 -51.839  1.00  0.00           S  
ATOM   2357  N   ARG B 152      19.190   8.954 -51.490  1.00  0.00           N  
ATOM   2358  CA  ARG B 152      20.428   9.589 -51.105  1.00  0.00           C  
ATOM   2359  C   ARG B 152      21.495   9.869 -52.151  1.00  0.00           C  
ATOM   2360  O   ARG B 152      22.692   9.868 -51.854  1.00  0.00           O  
ATOM   2361  CB  ARG B 152      21.070   8.740 -50.018  1.00  0.00           C  
ATOM   2362  CG  ARG B 152      20.275   8.648 -48.725  1.00  0.00           C  
ATOM   2363  CD  ARG B 152      20.839   7.627 -47.805  1.00  0.00           C  
ATOM   2364  NE  ARG B 152      19.972   7.390 -46.661  1.00  0.00           N  
ATOM   2365  CZ  ARG B 152      20.154   6.412 -45.753  1.00  0.00           C  
ATOM   2366  NH1 ARG B 152      21.174   5.590 -45.868  1.00  0.00           N1+
ATOM   2367  NH2 ARG B 152      19.308   6.279 -44.746  1.00  0.00           N  
ATOM   2368  N   ASP B 153      21.095   9.997 -53.405  1.00  0.00           N  
ATOM   2369  CA  ASP B 153      21.937  10.258 -54.658  1.00  0.00           C  
ATOM   2370  C   ASP B 153      22.476  11.691 -54.657  1.00  0.00           C  
ATOM   2371  O   ASP B 153      22.036  12.606 -53.960  1.00  0.00           O  
ATOM   2372  CB  ASP B 153      21.128  10.035 -55.938  1.00  0.00           C  
ATOM   2373  CG  ASP B 153      20.772   8.573 -56.167  1.00  0.00           C  
ATOM   2374  OD1 ASP B 153      21.461   7.726 -55.650  1.00  0.00           O  
ATOM   2375  OD2 ASP B 153      19.814   8.316 -56.856  1.00  0.00           O1-
ATOM   2376  N   ASN B 154      23.532  11.917 -55.485  1.00  0.00           N  
ATOM   2377  CA  ASN B 154      24.147  13.275 -55.614  1.00  0.00           C  
ATOM   2378  C   ASN B 154      24.678  13.573 -57.068  1.00  0.00           C  
ATOM   2379  O   ASN B 154      24.652  12.664 -57.926  1.00  0.00           O  
ATOM   2380  CB  ASN B 154      25.265  13.434 -54.600  1.00  0.00           C  
ATOM   2381  CG  ASN B 154      26.400  12.477 -54.837  1.00  0.00           C  
ATOM   2382  ND2 ASN B 154      26.793  11.771 -53.808  1.00  0.00           N  
ATOM   2383  OD1 ASN B 154      26.922  12.377 -55.954  1.00  0.00           O  
ATOM   2384  N   PHE B 155      25.233  14.757 -57.362  1.00  0.00           N  
ATOM   2385  CA  PHE B 155      25.720  15.206 -58.633  1.00  0.00           C  
ATOM   2386  C   PHE B 155      26.692  14.279 -59.403  1.00  0.00           C  
ATOM   2387  O   PHE B 155      26.844  14.529 -60.620  1.00  0.00           O  
ATOM   2388  CB  PHE B 155      26.395  16.562 -58.420  1.00  0.00           C  
ATOM   2389  CG  PHE B 155      27.694  16.481 -57.671  1.00  0.00           C  
ATOM   2390  CD1 PHE B 155      28.904  16.504 -58.348  1.00  0.00           C  
ATOM   2391  CD2 PHE B 155      27.710  16.381 -56.288  1.00  0.00           C  
ATOM   2392  CE1 PHE B 155      30.101  16.429 -57.660  1.00  0.00           C  
ATOM   2393  CE2 PHE B 155      28.904  16.308 -55.597  1.00  0.00           C  
ATOM   2394  CZ  PHE B 155      30.101  16.331 -56.285  1.00  0.00           C  
ATOM   2395  N   ASP B 156      27.342  13.301 -58.749  1.00  0.00           N  
ATOM   2396  CA  ASP B 156      28.220  12.321 -59.438  1.00  0.00           C  
ATOM   2397  C   ASP B 156      27.590  11.112 -60.057  1.00  0.00           C  
ATOM   2398  O   ASP B 156      28.238  10.427 -60.818  1.00  0.00           O  
ATOM   2399  CB  ASP B 156      29.284  11.818 -58.459  1.00  0.00           C  
ATOM   2400  CG  ASP B 156      30.342  12.867 -58.145  1.00  0.00           C  
ATOM   2401  OD1 ASP B 156      30.671  13.632 -59.020  1.00  0.00           O  
ATOM   2402  OD2 ASP B 156      30.812  12.893 -57.033  1.00  0.00           O1-
ATOM   2403  N   ALA B 157      26.250  10.929 -59.849  1.00  0.00           N  
ATOM   2404  CA  ALA B 157      25.451   9.830 -60.356  1.00  0.00           C  
ATOM   2405  C   ALA B 157      25.316   9.605 -61.811  1.00  0.00           C  
ATOM   2406  O   ALA B 157      25.192  10.528 -62.599  1.00  0.00           O  
ATOM   2407  CB  ALA B 157      24.073   9.936 -59.656  1.00  0.00           C  
ATOM   2408  N   LYS B 158      25.416   8.330 -62.240  1.00  0.00           N  
ATOM   2409  CA  LYS B 158      25.322   7.897 -63.658  1.00  0.00           C  
ATOM   2410  C   LYS B 158      25.097   6.348 -63.821  1.00  0.00           C  
ATOM   2411  O   LYS B 158      25.327   5.579 -62.896  1.00  0.00           O  
ATOM   2412  CB  LYS B 158      26.586   8.322 -64.408  1.00  0.00           C  
ATOM   2413  CG  LYS B 158      26.564   8.017 -65.900  1.00  0.00           C  
ATOM   2414  CD  LYS B 158      27.809   8.553 -66.592  1.00  0.00           C  
ATOM   2415  CE  LYS B 158      27.794   8.238 -68.080  1.00  0.00           C  
ATOM   2416  NZ  LYS B 158      29.019   8.734 -68.766  1.00  0.00           N1+
ATOM   2417  OXT LYS B 158      24.695   5.906 -64.862  1.00  0.00           O1-
TER    2418      LYS B 158 
ATOM   2419  N   PHE C   1      -7.950   5.524  13.176  1.00  0.00           N  
ATOM   2420  CA  PHE C   1      -7.202   4.538  14.014  1.00  0.00           C  
ATOM   2421  C   PHE C   1      -5.784   4.213  13.543  1.00  0.00           C  
ATOM   2422  O   PHE C   1      -4.879   5.051  13.445  1.00  0.00           O  
ATOM   2423  CB  PHE C   1      -7.987   3.227  14.092  1.00  0.00           C  
ATOM   2424  CG  PHE C   1      -9.223   3.311  14.942  1.00  0.00           C  
ATOM   2425  CD1 PHE C   1     -10.481   3.349  14.360  1.00  0.00           C  
ATOM   2426  CD2 PHE C   1      -9.130   3.352  16.325  1.00  0.00           C  
ATOM   2427  CE1 PHE C   1     -11.619   3.426  15.142  1.00  0.00           C  
ATOM   2428  CE2 PHE C   1     -10.265   3.428  17.109  1.00  0.00           C  
ATOM   2429  CZ  PHE C   1     -11.511   3.465  16.515  1.00  0.00           C  
ATOM   2430  N   THR C   2      -5.548   2.972  13.050  1.00  0.00           N  
ATOM   2431  CA  THR C   2      -4.210   2.535  12.583  1.00  0.00           C  
ATOM   2432  C   THR C   2      -4.108   2.364  11.056  1.00  0.00           C  
ATOM   2433  O   THR C   2      -3.655   3.288  10.407  1.00  0.00           O  
ATOM   2434  CB  THR C   2      -3.811   1.210  13.260  1.00  0.00           C  
ATOM   2435  CG2 THR C   2      -3.721   1.387  14.768  1.00  0.00           C  
ATOM   2436  OG1 THR C   2      -4.786   0.204  12.958  1.00  0.00           O  
ATOM   2437  N   LEU C   3      -4.557   1.198  10.523  1.00  0.00           N  
ATOM   2438  CA  LEU C   3      -4.579   1.030   9.038  1.00  0.00           C  
ATOM   2439  C   LEU C   3      -5.515   1.962   8.332  1.00  0.00           C  
ATOM   2440  O   LEU C   3      -6.728   1.788   8.491  1.00  0.00           O  
ATOM   2441  CB  LEU C   3      -4.973  -0.406   8.670  1.00  0.00           C  
ATOM   2442  CG  LEU C   3      -5.012  -0.721   7.169  1.00  0.00           C  
ATOM   2443  CD1 LEU C   3      -3.607  -0.615   6.591  1.00  0.00           C  
ATOM   2444  CD2 LEU C   3      -5.588  -2.113   6.957  1.00  0.00           C  
ATOM   2445  N   ILE C   4      -4.893   2.778   7.488  1.00  0.00           N  
ATOM   2446  CA  ILE C   4      -5.445   3.806   6.649  1.00  0.00           C  
ATOM   2447  C   ILE C   4      -4.866   3.818   5.240  1.00  0.00           C  
ATOM   2448  O   ILE C   4      -5.743   4.010   4.349  1.00  0.00           O  
ATOM   2449  CB  ILE C   4      -5.228   5.185   7.298  1.00  0.00           C  
ATOM   2450  CG1 ILE C   4      -3.732   5.468   7.463  1.00  0.00           C  
ATOM   2451  CG2 ILE C   4      -5.937   5.258   8.641  1.00  0.00           C  
ATOM   2452  CD1 ILE C   4      -3.422   6.883   7.893  1.00  0.00           C  
ATOM   2453  N   GLU C   5      -3.695   3.419   4.954  1.00  0.00           N  
ATOM   2454  CA  GLU C   5      -3.131   3.340   3.598  1.00  0.00           C  
ATOM   2455  C   GLU C   5      -3.908   2.389   2.679  1.00  0.00           C  
ATOM   2456  O   GLU C   5      -3.943   2.752   1.471  1.00  0.00           O  
ATOM   2457  CB  GLU C   5      -1.668   2.897   3.668  1.00  0.00           C  
ATOM   2458  CG  GLU C   5      -1.436   1.614   4.455  1.00  0.00           C  
ATOM   2459  CD  GLU C   5      -1.265   1.856   5.929  1.00  0.00           C  
ATOM   2460  OE1 GLU C   5      -2.009   2.634   6.475  1.00  0.00           O  
ATOM   2461  OE2 GLU C   5      -0.388   1.260   6.510  1.00  0.00           O1-
ATOM   2462  N   LEU C   6      -4.611   1.434   3.210  1.00  0.00           N  
ATOM   2463  CA  LEU C   6      -5.555   0.592   2.487  1.00  0.00           C  
ATOM   2464  C   LEU C   6      -6.683   1.342   1.757  1.00  0.00           C  
ATOM   2465  O   LEU C   6      -6.892   1.110   0.534  1.00  0.00           O  
ATOM   2466  CB  LEU C   6      -6.178  -0.407   3.470  1.00  0.00           C  
ATOM   2467  CG  LEU C   6      -7.280  -1.306   2.896  1.00  0.00           C  
ATOM   2468  CD1 LEU C   6      -6.696  -2.194   1.806  1.00  0.00           C  
ATOM   2469  CD2 LEU C   6      -7.889  -2.140   4.014  1.00  0.00           C  
ATOM   2470  N   MET C   7      -7.491   2.116   2.461  1.00  0.00           N  
ATOM   2471  CA  MET C   7      -8.603   2.807   1.911  1.00  0.00           C  
ATOM   2472  C   MET C   7      -8.067   3.918   1.062  1.00  0.00           C  
ATOM   2473  O   MET C   7      -8.656   4.309   0.047  1.00  0.00           O  
ATOM   2474  CB  MET C   7      -9.522   3.335   3.011  1.00  0.00           C  
ATOM   2475  CG  MET C   7     -10.242   2.253   3.803  1.00  0.00           C  
ATOM   2476  SD  MET C   7     -11.177   1.126   2.750  1.00  0.00           S  
ATOM   2477  CE  MET C   7     -12.413   2.236   2.080  1.00  0.00           C  
ATOM   2478  N   ILE C   8      -6.892   4.510   1.370  1.00  0.00           N  
ATOM   2479  CA  ILE C   8      -6.231   5.546   0.559  1.00  0.00           C  
ATOM   2480  C   ILE C   8      -5.830   5.148  -0.815  1.00  0.00           C  
ATOM   2481  O   ILE C   8      -6.214   5.705  -1.787  1.00  0.00           O  
ATOM   2482  CB  ILE C   8      -4.968   6.060   1.275  1.00  0.00           C  
ATOM   2483  CG1 ILE C   8      -5.350   6.844   2.533  1.00  0.00           C  
ATOM   2484  CG2 ILE C   8      -4.140   6.924   0.336  1.00  0.00           C  
ATOM   2485  CD1 ILE C   8      -4.179   7.154   3.438  1.00  0.00           C  
ATOM   2486  N   VAL C   9      -5.194   3.952  -0.971  1.00  0.00           N  
ATOM   2487  CA  VAL C   9      -4.827   3.294  -2.312  1.00  0.00           C  
ATOM   2488  C   VAL C   9      -6.140   2.897  -2.962  1.00  0.00           C  
ATOM   2489  O   VAL C   9      -6.289   3.224  -4.136  1.00  0.00           O  
ATOM   2490  CB  VAL C   9      -3.943   2.044  -2.141  1.00  0.00           C  
ATOM   2491  CG1 VAL C   9      -3.774   1.325  -3.471  1.00  0.00           C  
ATOM   2492  CG2 VAL C   9      -2.591   2.442  -1.568  1.00  0.00           C  
ATOM   2493  N   ILE C  10      -7.166   2.354  -2.300  1.00  0.00           N  
ATOM   2494  CA  ILE C  10      -8.433   2.002  -2.913  1.00  0.00           C  
ATOM   2495  C   ILE C  10      -8.995   3.265  -3.550  1.00  0.00           C  
ATOM   2496  O   ILE C  10      -9.394   3.288  -4.721  1.00  0.00           O  
ATOM   2497  CB  ILE C  10      -9.426   1.426  -1.887  1.00  0.00           C  
ATOM   2498  CG1 ILE C  10      -8.989   0.026  -1.448  1.00  0.00           C  
ATOM   2499  CG2 ILE C  10     -10.831   1.390  -2.469  1.00  0.00           C  
ATOM   2500  CD1 ILE C  10      -9.729  -0.493  -0.237  1.00  0.00           C  
ATOM   2501  N   ALA C  11      -8.987   4.425  -2.858  1.00  0.00           N  
ATOM   2502  CA  ALA C  11      -9.399   5.695  -3.402  1.00  0.00           C  
ATOM   2503  C   ALA C  11      -8.655   6.238  -4.660  1.00  0.00           C  
ATOM   2504  O   ALA C  11      -9.330   6.711  -5.533  1.00  0.00           O  
ATOM   2505  CB  ALA C  11      -9.302   6.716  -2.228  1.00  0.00           C  
ATOM   2506  N   ILE C  12      -7.329   6.063  -4.704  1.00  0.00           N  
ATOM   2507  CA  ILE C  12      -6.450   6.404  -5.778  1.00  0.00           C  
ATOM   2508  C   ILE C  12      -6.816   5.536  -7.016  1.00  0.00           C  
ATOM   2509  O   ILE C  12      -6.779   5.946  -8.190  1.00  0.00           O  
ATOM   2510  CB  ILE C  12      -4.981   6.192  -5.368  1.00  0.00           C  
ATOM   2511  CG1 ILE C  12      -4.584   7.183  -4.272  1.00  0.00           C  
ATOM   2512  CG2 ILE C  12      -4.067   6.333  -6.576  1.00  0.00           C  
ATOM   2513  CD1 ILE C  12      -4.688   8.632  -4.691  1.00  0.00           C  
ATOM   2514  N   VAL C  13      -7.135   4.283  -6.784  1.00  0.00           N  
ATOM   2515  CA  VAL C  13      -7.563   3.290  -7.870  1.00  0.00           C  
ATOM   2516  C   VAL C  13      -8.868   3.878  -8.497  1.00  0.00           C  
ATOM   2517  O   VAL C  13      -9.018   4.009  -9.715  1.00  0.00           O  
ATOM   2518  CB  VAL C  13      -7.833   1.885  -7.300  1.00  0.00           C  
ATOM   2519  CG1 VAL C  13      -8.473   0.996  -8.356  1.00  0.00           C  
ATOM   2520  CG2 VAL C  13      -6.535   1.273  -6.795  1.00  0.00           C  
ATOM   2521  N   GLY C  14      -9.768   4.358  -7.625  1.00  0.00           N  
ATOM   2522  CA  GLY C  14     -10.989   5.061  -7.955  1.00  0.00           C  
ATOM   2523  C   GLY C  14     -10.750   6.292  -8.763  1.00  0.00           C  
ATOM   2524  O   GLY C  14     -11.472   6.466  -9.749  1.00  0.00           O  
ATOM   2525  N   ILE C  15      -9.754   7.100  -8.364  1.00  0.00           N  
ATOM   2526  CA  ILE C  15      -9.401   8.253  -9.114  1.00  0.00           C  
ATOM   2527  C   ILE C  15      -8.829   7.850 -10.512  1.00  0.00           C  
ATOM   2528  O   ILE C  15      -9.326   8.344 -11.503  1.00  0.00           O  
ATOM   2529  CB  ILE C  15      -8.379   9.096  -8.328  1.00  0.00           C  
ATOM   2530  CG1 ILE C  15      -9.014   9.649  -7.049  1.00  0.00           C  
ATOM   2531  CG2 ILE C  15      -7.845  10.227  -9.193  1.00  0.00           C  
ATOM   2532  CD1 ILE C  15     -10.195  10.559  -7.298  1.00  0.00           C  
ATOM   2533  N   LEU C  16      -8.008   6.844 -10.536  1.00  0.00           N  
ATOM   2534  CA  LEU C  16      -7.443   6.315 -11.837  1.00  0.00           C  
ATOM   2535  C   LEU C  16      -8.560   5.939 -12.863  1.00  0.00           C  
ATOM   2536  O   LEU C  16      -8.427   6.283 -14.018  1.00  0.00           O  
ATOM   2537  CB  LEU C  16      -6.569   5.082 -11.571  1.00  0.00           C  
ATOM   2538  CG  LEU C  16      -5.917   4.451 -12.807  1.00  0.00           C  
ATOM   2539  CD1 LEU C  16      -5.001   5.468 -13.474  1.00  0.00           C  
ATOM   2540  CD2 LEU C  16      -5.144   3.207 -12.394  1.00  0.00           C  
ATOM   2541  N   ALA C  17      -9.656   5.306 -12.424  1.00  0.00           N  
ATOM   2542  CA  ALA C  17     -10.879   4.964 -13.178  1.00  0.00           C  
ATOM   2543  C   ALA C  17     -11.555   6.258 -13.720  1.00  0.00           C  
ATOM   2544  O   ALA C  17     -11.853   6.417 -14.901  1.00  0.00           O  
ATOM   2545  CB  ALA C  17     -11.761   4.081 -12.296  1.00  0.00           C  
ATOM   2546  N   ALA C  18     -11.703   7.264 -12.840  1.00  0.00           N  
ATOM   2547  CA  ALA C  18     -12.218   8.589 -13.210  1.00  0.00           C  
ATOM   2548  C   ALA C  18     -11.261   9.264 -14.253  1.00  0.00           C  
ATOM   2549  O   ALA C  18     -11.753   9.995 -15.223  1.00  0.00           O  
ATOM   2550  CB  ALA C  18     -12.334   9.505 -12.034  1.00  0.00           C  
ATOM   2551  N   VAL C  19      -9.936   9.140 -14.217  1.00  0.00           N  
ATOM   2552  CA  VAL C  19      -8.925   9.597 -15.137  1.00  0.00           C  
ATOM   2553  C   VAL C  19      -9.019   8.755 -16.498  1.00  0.00           C  
ATOM   2554  O   VAL C  19      -8.900   9.256 -17.596  1.00  0.00           O  
ATOM   2555  CB  VAL C  19      -7.537   9.448 -14.487  1.00  0.00           C  
ATOM   2556  CG1 VAL C  19      -6.440   9.730 -15.504  1.00  0.00           C  
ATOM   2557  CG2 VAL C  19      -7.420  10.386 -13.295  1.00  0.00           C  
ATOM   2558  N   ALA C  20      -9.189   7.435 -16.452  1.00  0.00           N  
ATOM   2559  CA  ALA C  20      -9.328   6.474 -17.616  1.00  0.00           C  
ATOM   2560  C   ALA C  20     -10.605   6.754 -18.502  1.00  0.00           C  
ATOM   2561  O   ALA C  20     -10.443   6.885 -19.698  1.00  0.00           O  
ATOM   2562  CB  ALA C  20      -9.520   5.012 -17.139  1.00  0.00           C  
ATOM   2563  N   LEU C  21     -11.743   7.153 -17.910  1.00  0.00           N  
ATOM   2564  CA  LEU C  21     -13.027   7.416 -18.524  1.00  0.00           C  
ATOM   2565  C   LEU C  21     -12.938   8.444 -19.715  1.00  0.00           C  
ATOM   2566  O   LEU C  21     -13.410   8.076 -20.773  1.00  0.00           O  
ATOM   2567  CB  LEU C  21     -13.992   7.932 -17.448  1.00  0.00           C  
ATOM   2568  CG  LEU C  21     -15.332   8.473 -17.962  1.00  0.00           C  
ATOM   2569  CD1 LEU C  21     -16.088   7.363 -18.679  1.00  0.00           C  
ATOM   2570  CD2 LEU C  21     -16.140   9.018 -16.794  1.00  0.00           C  
ATOM   2571  N   PRO C  22     -12.521   9.710 -19.528  1.00  0.00           N  
ATOM   2572  CA  PRO C  22     -12.468  10.662 -20.599  1.00  0.00           C  
ATOM   2573  C   PRO C  22     -11.271  10.348 -21.648  1.00  0.00           C  
ATOM   2574  O   PRO C  22     -11.478  10.607 -22.837  1.00  0.00           O  
ATOM   2575  CB  PRO C  22     -12.248  11.964 -19.821  1.00  0.00           C  
ATOM   2576  CG  PRO C  22     -11.452  11.548 -18.631  1.00  0.00           C  
ATOM   2577  CD  PRO C  22     -12.027  10.212 -18.245  1.00  0.00           C  
ATOM   2578  N   ALA C  23     -10.165   9.703 -21.197  1.00  0.00           N  
ATOM   2579  CA  ALA C  23      -9.055   9.218 -22.072  1.00  0.00           C  
ATOM   2580  C   ALA C  23      -9.465   8.038 -22.981  1.00  0.00           C  
ATOM   2581  O   ALA C  23      -9.264   8.132 -24.167  1.00  0.00           O  
ATOM   2582  CB  ALA C  23      -7.911   8.878 -21.068  1.00  0.00           C  
ATOM   2583  N   TYR C  24     -10.126   7.022 -22.472  1.00  0.00           N  
ATOM   2584  CA  TYR C  24     -10.741   6.024 -23.236  1.00  0.00           C  
ATOM   2585  C   TYR C  24     -11.799   6.517 -24.227  1.00  0.00           C  
ATOM   2586  O   TYR C  24     -11.630   6.133 -25.416  1.00  0.00           O  
ATOM   2587  CB  TYR C  24     -11.347   4.996 -22.277  1.00  0.00           C  
ATOM   2588  CG  TYR C  24     -12.064   3.861 -22.973  1.00  0.00           C  
ATOM   2589  CD1 TYR C  24     -11.357   2.738 -23.378  1.00  0.00           C  
ATOM   2590  CD2 TYR C  24     -13.429   3.942 -23.207  1.00  0.00           C  
ATOM   2591  CE1 TYR C  24     -12.012   1.701 -24.014  1.00  0.00           C  
ATOM   2592  CE2 TYR C  24     -14.084   2.905 -23.843  1.00  0.00           C  
ATOM   2593  CZ  TYR C  24     -13.380   1.788 -24.245  1.00  0.00           C  
ATOM   2594  OH  TYR C  24     -14.032   0.755 -24.878  1.00  0.00           O  
ATOM   2595  N   GLN C  25     -12.809   7.361 -23.908  1.00  0.00           N  
ATOM   2596  CA  GLN C  25     -13.764   7.951 -24.814  1.00  0.00           C  
ATOM   2597  C   GLN C  25     -13.118   8.737 -25.981  1.00  0.00           C  
ATOM   2598  O   GLN C  25     -13.437   8.446 -27.108  1.00  0.00           O  
ATOM   2599  CB  GLN C  25     -14.702   8.868 -24.025  1.00  0.00           C  
ATOM   2600  CG  GLN C  25     -15.670   8.132 -23.114  1.00  0.00           C  
ATOM   2601  CD  GLN C  25     -16.487   9.077 -22.253  1.00  0.00           C  
ATOM   2602  NE2 GLN C  25     -17.629   8.599 -21.771  1.00  0.00           N  
ATOM   2603  OE1 GLN C  25     -16.096  10.225 -22.024  1.00  0.00           O  
ATOM   2604  N   ASP C  26     -12.215   9.645 -25.698  1.00  0.00           N  
ATOM   2605  CA  ASP C  26     -11.502  10.341 -26.765  1.00  0.00           C  
ATOM   2606  C   ASP C  26     -10.652   9.535 -27.730  1.00  0.00           C  
ATOM   2607  O   ASP C  26     -10.804   9.656 -28.900  1.00  0.00           O  
ATOM   2608  CB  ASP C  26     -10.602  11.404 -26.131  1.00  0.00           C  
ATOM   2609  CG  ASP C  26      -9.936  12.308 -27.160  1.00  0.00           C  
ATOM   2610  OD1 ASP C  26     -10.637  13.029 -27.830  1.00  0.00           O  
ATOM   2611  OD2 ASP C  26      -8.734  12.268 -27.266  1.00  0.00           O1-
ATOM   2612  N   TYR C  27      -9.823   8.594 -27.250  1.00  0.00           N  
ATOM   2613  CA  TYR C  27      -8.997   7.669 -28.029  1.00  0.00           C  
ATOM   2614  C   TYR C  27      -9.826   6.759 -28.958  1.00  0.00           C  
ATOM   2615  O   TYR C  27      -9.582   6.627 -30.149  1.00  0.00           O  
ATOM   2616  CB  TYR C  27      -8.143   6.818 -27.086  1.00  0.00           C  
ATOM   2617  CG  TYR C  27      -7.406   5.693 -27.779  1.00  0.00           C  
ATOM   2618  CD1 TYR C  27      -6.471   5.979 -28.763  1.00  0.00           C  
ATOM   2619  CD2 TYR C  27      -7.665   4.376 -27.430  1.00  0.00           C  
ATOM   2620  CE1 TYR C  27      -5.798   4.951 -29.396  1.00  0.00           C  
ATOM   2621  CE2 TYR C  27      -6.992   3.349 -28.063  1.00  0.00           C  
ATOM   2622  CZ  TYR C  27      -6.062   3.633 -29.042  1.00  0.00           C  
ATOM   2623  OH  TYR C  27      -5.391   2.610 -29.672  1.00  0.00           O  
ATOM   2624  N   THR C  28     -10.809   6.102 -28.427  1.00  0.00           N  
ATOM   2625  CA  THR C  28     -11.667   5.169 -29.133  1.00  0.00           C  
ATOM   2626  C   THR C  28     -12.646   5.888 -30.138  1.00  0.00           C  
ATOM   2627  O   THR C  28     -12.948   5.368 -31.201  1.00  0.00           O  
ATOM   2628  CB  THR C  28     -12.467   4.329 -28.121  1.00  0.00           C  
ATOM   2629  CG2 THR C  28     -11.530   3.507 -27.249  1.00  0.00           C  
ATOM   2630  OG1 THR C  28     -13.250   5.195 -27.290  1.00  0.00           O  
ATOM   2631  N   ALA C  29     -13.011   7.140 -29.817  1.00  0.00           N  
ATOM   2632  CA  ALA C  29     -13.764   7.944 -30.700  1.00  0.00           C  
ATOM   2633  C   ALA C  29     -13.005   8.180 -32.029  1.00  0.00           C  
ATOM   2634  O   ALA C  29     -13.615   8.001 -33.073  1.00  0.00           O  
ATOM   2635  CB  ALA C  29     -14.019   9.342 -30.014  1.00  0.00           C  
ATOM   2636  N   ARG C  30     -11.704   8.498 -31.985  1.00  0.00           N  
ATOM   2637  CA  ARG C  30     -10.812   8.603 -33.130  1.00  0.00           C  
ATOM   2638  C   ARG C  30     -10.796   7.326 -33.944  1.00  0.00           C  
ATOM   2639  O   ARG C  30     -10.843   7.260 -35.171  1.00  0.00           O  
ATOM   2640  CB  ARG C  30      -9.396   8.925 -32.676  1.00  0.00           C  
ATOM   2641  CG  ARG C  30      -8.378   9.048 -33.799  1.00  0.00           C  
ATOM   2642  CD  ARG C  30      -7.028   9.388 -33.281  1.00  0.00           C  
ATOM   2643  NE  ARG C  30      -6.042   9.468 -34.347  1.00  0.00           N  
ATOM   2644  CZ  ARG C  30      -5.342   8.419 -34.821  1.00  0.00           C  
ATOM   2645  NH1 ARG C  30      -5.530   7.220 -34.316  1.00  0.00           N1+
ATOM   2646  NH2 ARG C  30      -4.466   8.596 -35.795  1.00  0.00           N  
ATOM   2647  N   ALA C  31     -10.654   6.170 -33.304  1.00  0.00           N  
ATOM   2648  CA  ALA C  31     -10.766   4.844 -33.921  1.00  0.00           C  
ATOM   2649  C   ALA C  31     -12.090   4.508 -34.619  1.00  0.00           C  
ATOM   2650  O   ALA C  31     -12.097   3.815 -35.662  1.00  0.00           O  
ATOM   2651  CB  ALA C  31     -10.393   3.699 -32.949  1.00  0.00           C  
ATOM   2652  N   GLN C  32     -13.243   4.911 -33.967  1.00  0.00           N  
ATOM   2653  CA  GLN C  32     -14.631   4.776 -34.463  1.00  0.00           C  
ATOM   2654  C   GLN C  32     -14.886   5.527 -35.803  1.00  0.00           C  
ATOM   2655  O   GLN C  32     -15.363   4.893 -36.756  1.00  0.00           O  
ATOM   2656  CB  GLN C  32     -15.610   5.280 -33.400  1.00  0.00           C  
ATOM   2657  CG  GLN C  32     -15.718   4.382 -32.179  1.00  0.00           C  
ATOM   2658  CD  GLN C  32     -16.334   5.095 -30.989  1.00  0.00           C  
ATOM   2659  NE2 GLN C  32     -16.275   4.460 -29.825  1.00  0.00           N  
ATOM   2660  OE1 GLN C  32     -16.858   6.205 -31.116  1.00  0.00           O  
ATOM   2661  N   VAL C  33     -14.443   6.771 -35.853  1.00  0.00           N  
ATOM   2662  CA  VAL C  33     -14.464   7.770 -36.974  1.00  0.00           C  
ATOM   2663  C   VAL C  33     -13.564   7.339 -38.153  1.00  0.00           C  
ATOM   2664  O   VAL C  33     -13.910   7.419 -39.327  1.00  0.00           O  
ATOM   2665  CB  VAL C  33     -13.997   9.150 -36.473  1.00  0.00           C  
ATOM   2666  CG1 VAL C  33     -13.822  10.109 -37.641  1.00  0.00           C  
ATOM   2667  CG2 VAL C  33     -14.996   9.700 -35.467  1.00  0.00           C  
ATOM   2668  N   SER C  34     -12.316   6.991 -37.820  1.00  0.00           N  
ATOM   2669  CA  SER C  34     -11.339   6.462 -38.812  1.00  0.00           C  
ATOM   2670  C   SER C  34     -11.740   5.104 -39.425  1.00  0.00           C  
ATOM   2671  O   SER C  34     -11.492   5.035 -40.635  1.00  0.00           O  
ATOM   2672  CB  SER C  34      -9.977   6.325 -38.158  1.00  0.00           C  
ATOM   2673  OG  SER C  34     -10.002   5.357 -37.145  1.00  0.00           O  
ATOM   2674  N   GLU C  35     -12.517   4.256 -38.700  1.00  0.00           N  
ATOM   2675  CA  GLU C  35     -13.139   3.084 -39.403  1.00  0.00           C  
ATOM   2676  C   GLU C  35     -14.057   3.601 -40.541  1.00  0.00           C  
ATOM   2677  O   GLU C  35     -14.018   3.117 -41.698  1.00  0.00           O  
ATOM   2678  CB  GLU C  35     -13.943   2.218 -38.430  1.00  0.00           C  
ATOM   2679  CG  GLU C  35     -14.620   1.015 -39.071  1.00  0.00           C  
ATOM   2680  CD  GLU C  35     -15.329   0.142 -38.073  1.00  0.00           C  
ATOM   2681  OE1 GLU C  35     -16.326   0.568 -37.542  1.00  0.00           O  
ATOM   2682  OE2 GLU C  35     -14.872  -0.953 -37.842  1.00  0.00           O1-
ATOM   2683  N   ALA C  36     -14.901   4.555 -40.248  1.00  0.00           N  
ATOM   2684  CA  ALA C  36     -15.780   5.121 -41.311  1.00  0.00           C  
ATOM   2685  C   ALA C  36     -15.038   5.691 -42.459  1.00  0.00           C  
ATOM   2686  O   ALA C  36     -15.460   5.513 -43.578  1.00  0.00           O  
ATOM   2687  CB  ALA C  36     -16.698   6.129 -40.614  1.00  0.00           C  
ATOM   2688  N   ILE C  37     -13.960   6.362 -42.162  1.00  0.00           N  
ATOM   2689  CA  ILE C  37     -13.162   6.957 -43.245  1.00  0.00           C  
ATOM   2690  C   ILE C  37     -12.584   5.896 -44.115  1.00  0.00           C  
ATOM   2691  O   ILE C  37     -12.577   6.058 -45.297  1.00  0.00           O  
ATOM   2692  CB  ILE C  37     -12.019   7.831 -42.697  1.00  0.00           C  
ATOM   2693  CG1 ILE C  37     -12.585   9.043 -41.952  1.00  0.00           C  
ATOM   2694  CG2 ILE C  37     -11.103   8.277 -43.826  1.00  0.00           C  
ATOM   2695  CD1 ILE C  37     -13.430   9.952 -42.815  1.00  0.00           C  
ATOM   2696  N   LEU C  38     -12.051   4.822 -43.508  1.00  0.00           N  
ATOM   2697  CA  LEU C  38     -11.432   3.705 -44.260  1.00  0.00           C  
ATOM   2698  C   LEU C  38     -12.460   3.030 -45.186  1.00  0.00           C  
ATOM   2699  O   LEU C  38     -12.268   2.747 -46.374  1.00  0.00           O  
ATOM   2700  CB  LEU C  38     -10.849   2.666 -43.293  1.00  0.00           C  
ATOM   2701  CG  LEU C  38     -10.235   1.421 -43.945  1.00  0.00           C  
ATOM   2702  CD1 LEU C  38      -9.188   1.846 -44.966  1.00  0.00           C  
ATOM   2703  CD2 LEU C  38      -9.623   0.534 -42.871  1.00  0.00           C  
ATOM   2704  N   LEU C  39     -13.659   2.830 -44.651  1.00  0.00           N  
ATOM   2705  CA  LEU C  39     -14.854   2.209 -45.331  1.00  0.00           C  
ATOM   2706  C   LEU C  39     -15.210   3.170 -46.526  1.00  0.00           C  
ATOM   2707  O   LEU C  39     -15.633   2.677 -47.554  1.00  0.00           O  
ATOM   2708  CB  LEU C  39     -16.040   2.059 -44.371  1.00  0.00           C  
ATOM   2709  CG  LEU C  39     -15.915   0.940 -43.328  1.00  0.00           C  
ATOM   2710  CD1 LEU C  39     -17.045   1.061 -42.315  1.00  0.00           C  
ATOM   2711  CD2 LEU C  39     -15.949  -0.411 -44.027  1.00  0.00           C  
ATOM   2712  N   ALA C  40     -15.177   4.474 -46.357  1.00  0.00           N  
ATOM   2713  CA  ALA C  40     -15.354   5.396 -47.392  1.00  0.00           C  
ATOM   2714  C   ALA C  40     -14.281   5.440 -48.521  1.00  0.00           C  
ATOM   2715  O   ALA C  40     -14.517   5.706 -49.693  1.00  0.00           O  
ATOM   2716  CB  ALA C  40     -15.459   6.751 -46.665  1.00  0.00           C  
ATOM   2717  N   GLU C  41     -13.016   5.226 -48.110  1.00  0.00           N  
ATOM   2718  CA  GLU C  41     -11.848   5.070 -49.029  1.00  0.00           C  
ATOM   2719  C   GLU C  41     -11.966   3.827 -49.921  1.00  0.00           C  
ATOM   2720  O   GLU C  41     -12.301   2.720 -49.458  1.00  0.00           O  
ATOM   2721  CB  GLU C  41     -10.545   4.993 -48.230  1.00  0.00           C  
ATOM   2722  CG  GLU C  41     -10.169   6.283 -47.515  1.00  0.00           C  
ATOM   2723  CD  GLU C  41      -9.749   7.374 -48.460  1.00  0.00           C  
ATOM   2724  OE1 GLU C  41      -8.994   7.096 -49.361  1.00  0.00           O  
ATOM   2725  OE2 GLU C  41     -10.184   8.487 -48.281  1.00  0.00           O1-
ATOM   2726  N   GLY C  42     -11.542   3.963 -51.234  1.00  0.00           N  
ATOM   2727  CA  GLY C  42     -11.682   2.901 -52.259  1.00  0.00           C  
ATOM   2728  C   GLY C  42     -13.108   2.930 -52.917  1.00  0.00           C  
ATOM   2729  O   GLY C  42     -13.161   2.823 -54.144  1.00  0.00           O  
ATOM   2730  N   GLN C  43     -14.157   3.082 -52.077  1.00  0.00           N  
ATOM   2731  CA  GLN C  43     -15.527   3.328 -52.522  1.00  0.00           C  
ATOM   2732  C   GLN C  43     -15.528   4.684 -53.304  1.00  0.00           C  
ATOM   2733  O   GLN C  43     -16.061   4.786 -54.421  1.00  0.00           O  
ATOM   2734  CB  GLN C  43     -16.493   3.367 -51.335  1.00  0.00           C  
ATOM   2735  CG  GLN C  43     -17.950   3.550 -51.723  1.00  0.00           C  
ATOM   2736  CD  GLN C  43     -18.879   3.505 -50.525  1.00  0.00           C  
ATOM   2737  NE2 GLN C  43     -20.162   3.275 -50.779  1.00  0.00           N  
ATOM   2738  OE1 GLN C  43     -18.448   3.677 -49.381  1.00  0.00           O  
ATOM   2739  N   LYS C  44     -14.874   5.732 -52.848  1.00  0.00           N  
ATOM   2740  CA  LYS C  44     -14.719   7.055 -53.424  1.00  0.00           C  
ATOM   2741  C   LYS C  44     -13.914   6.942 -54.804  1.00  0.00           C  
ATOM   2742  O   LYS C  44     -14.082   7.763 -55.676  1.00  0.00           O  
ATOM   2743  CB  LYS C  44     -14.012   7.975 -52.427  1.00  0.00           C  
ATOM   2744  CG  LYS C  44     -12.501   7.792 -52.366  1.00  0.00           C  
ATOM   2745  CD  LYS C  44     -11.856   8.822 -51.451  1.00  0.00           C  
ATOM   2746  CE  LYS C  44     -10.349   8.874 -51.650  1.00  0.00           C  
ATOM   2747  NZ  LYS C  44      -9.698   9.838 -50.721  1.00  0.00           N1+
ATOM   2748  N   SER C  45     -13.059   5.930 -54.923  1.00  0.00           N  
ATOM   2749  CA  SER C  45     -12.327   5.639 -56.152  1.00  0.00           C  
ATOM   2750  C   SER C  45     -13.238   5.007 -57.223  1.00  0.00           C  
ATOM   2751  O   SER C  45     -13.198   5.492 -58.333  1.00  0.00           O  
ATOM   2752  CB  SER C  45     -11.165   4.713 -55.849  1.00  0.00           C  
ATOM   2753  OG  SER C  45     -10.218   5.345 -55.033  1.00  0.00           O  
ATOM   2754  N   ALA C  46     -14.116   4.095 -56.818  1.00  0.00           N  
ATOM   2755  CA  ALA C  46     -15.187   3.700 -57.752  1.00  0.00           C  
ATOM   2756  C   ALA C  46     -16.178   4.818 -58.211  1.00  0.00           C  
ATOM   2757  O   ALA C  46     -16.545   4.948 -59.421  1.00  0.00           O  
ATOM   2758  CB  ALA C  46     -15.956   2.557 -57.051  1.00  0.00           C  
ATOM   2759  N   VAL C  47     -16.549   5.732 -57.286  1.00  0.00           N  
ATOM   2760  CA  VAL C  47     -17.339   6.942 -57.574  1.00  0.00           C  
ATOM   2761  C   VAL C  47     -16.469   7.821 -58.513  1.00  0.00           C  
ATOM   2762  O   VAL C  47     -17.008   8.396 -59.420  1.00  0.00           O  
ATOM   2763  CB  VAL C  47     -17.691   7.705 -56.283  1.00  0.00           C  
ATOM   2764  CG1 VAL C  47     -18.326   9.047 -56.615  1.00  0.00           C  
ATOM   2765  CG2 VAL C  47     -18.621   6.865 -55.422  1.00  0.00           C  
ATOM   2766  N   THR C  48     -15.202   8.023 -58.207  1.00  0.00           N  
ATOM   2767  CA  THR C  48     -14.365   8.707 -59.172  1.00  0.00           C  
ATOM   2768  C   THR C  48     -14.340   8.126 -60.568  1.00  0.00           C  
ATOM   2769  O   THR C  48     -14.530   8.913 -61.510  1.00  0.00           O  
ATOM   2770  CB  THR C  48     -12.918   8.773 -58.649  1.00  0.00           C  
ATOM   2771  CG2 THR C  48     -12.010   9.432 -59.676  1.00  0.00           C  
ATOM   2772  OG1 THR C  48     -12.882   9.526 -57.430  1.00  0.00           O  
ATOM   2773  N   GLU C  49     -14.177   6.823 -60.698  1.00  0.00           N  
ATOM   2774  CA  GLU C  49     -14.154   6.107 -61.991  1.00  0.00           C  
ATOM   2775  C   GLU C  49     -15.453   6.219 -62.781  1.00  0.00           C  
ATOM   2776  O   GLU C  49     -15.413   6.467 -63.984  1.00  0.00           O  
ATOM   2777  CB  GLU C  49     -13.839   4.627 -61.763  1.00  0.00           C  
ATOM   2778  CG  GLU C  49     -12.428   4.354 -61.263  1.00  0.00           C  
ATOM   2779  CD  GLU C  49     -11.377   4.616 -62.306  1.00  0.00           C  
ATOM   2780  OE1 GLU C  49     -11.477   4.063 -63.375  1.00  0.00           O  
ATOM   2781  OE2 GLU C  49     -10.472   5.369 -62.034  1.00  0.00           O1-
ATOM   2782  N   TYR C  50     -16.647   6.224 -62.096  1.00  0.00           N  
ATOM   2783  CA  TYR C  50     -17.901   6.531 -62.699  1.00  0.00           C  
ATOM   2784  C   TYR C  50     -18.020   8.051 -63.182  1.00  0.00           C  
ATOM   2785  O   TYR C  50     -18.294   8.394 -64.323  1.00  0.00           O  
ATOM   2786  CB  TYR C  50     -19.006   6.173 -61.703  1.00  0.00           C  
ATOM   2787  CG  TYR C  50     -20.404   6.357 -62.251  1.00  0.00           C  
ATOM   2788  CD1 TYR C  50     -21.117   5.261 -62.716  1.00  0.00           C  
ATOM   2789  CD2 TYR C  50     -20.973   7.621 -62.289  1.00  0.00           C  
ATOM   2790  CE1 TYR C  50     -22.393   5.430 -63.216  1.00  0.00           C  
ATOM   2791  CE2 TYR C  50     -22.250   7.789 -62.789  1.00  0.00           C  
ATOM   2792  CZ  TYR C  50     -22.959   6.699 -63.251  1.00  0.00           C  
ATOM   2793  OH  TYR C  50     -24.230   6.867 -63.750  1.00  0.00           O  
ATOM   2794  N   TYR C  51     -17.812   9.005 -62.225  1.00  0.00           N  
ATOM   2795  CA  TYR C  51     -17.944  10.454 -62.501  1.00  0.00           C  
ATOM   2796  C   TYR C  51     -17.046  11.033 -63.655  1.00  0.00           C  
ATOM   2797  O   TYR C  51     -17.492  11.636 -64.629  1.00  0.00           O  
ATOM   2798  CB  TYR C  51     -17.663  11.223 -61.207  1.00  0.00           C  
ATOM   2799  CG  TYR C  51     -17.780  12.724 -61.352  1.00  0.00           C  
ATOM   2800  CD1 TYR C  51     -19.006  13.299 -61.653  1.00  0.00           C  
ATOM   2801  CD2 TYR C  51     -16.661  13.526 -61.182  1.00  0.00           C  
ATOM   2802  CE1 TYR C  51     -19.112  14.670 -61.785  1.00  0.00           C  
ATOM   2803  CE2 TYR C  51     -16.767  14.897 -61.314  1.00  0.00           C  
ATOM   2804  CZ  TYR C  51     -17.986  15.469 -61.614  1.00  0.00           C  
ATOM   2805  OH  TYR C  51     -18.092  16.834 -61.746  1.00  0.00           O  
ATOM   2806  N   LEU C  52     -15.772  10.723 -63.485  1.00  0.00           N  
ATOM   2807  CA  LEU C  52     -14.770  11.033 -64.477  1.00  0.00           C  
ATOM   2808  C   LEU C  52     -14.969  10.553 -65.978  1.00  0.00           C  
ATOM   2809  O   LEU C  52     -14.406  11.215 -66.849  1.00  0.00           O  
ATOM   2810  CB  LEU C  52     -13.447  10.468 -63.945  1.00  0.00           C  
ATOM   2811  CG  LEU C  52     -12.200  10.798 -64.776  1.00  0.00           C  
ATOM   2812  CD1 LEU C  52     -12.020  12.308 -64.844  1.00  0.00           C  
ATOM   2813  CD2 LEU C  52     -10.984  10.130 -64.153  1.00  0.00           C  
ATOM   2814  N   ASN C  53     -15.586   9.445 -66.277  1.00  0.00           N  
ATOM   2815  CA  ASN C  53     -15.829   8.893 -67.561  1.00  0.00           C  
ATOM   2816  C   ASN C  53     -17.291   9.102 -68.012  1.00  0.00           C  
ATOM   2817  O   ASN C  53     -17.515   9.313 -69.175  1.00  0.00           O  
ATOM   2818  CB  ASN C  53     -15.518   7.411 -67.533  1.00  0.00           C  
ATOM   2819  CG  ASN C  53     -14.008   7.124 -67.334  1.00  0.00           C  
ATOM   2820  ND2 ASN C  53     -13.542   6.713 -66.182  1.00  0.00           N  
ATOM   2821  OD1 ASN C  53     -13.229   7.353 -68.235  1.00  0.00           O  
ATOM   2822  N   HIS C  54     -18.302   9.132 -67.131  1.00  0.00           N  
ATOM   2823  CA  HIS C  54     -19.699   9.379 -67.439  1.00  0.00           C  
ATOM   2824  C   HIS C  54     -20.124  10.861 -67.529  1.00  0.00           C  
ATOM   2825  O   HIS C  54     -20.920  11.318 -68.331  1.00  0.00           O  
ATOM   2826  CB  HIS C  54     -20.567   8.676 -66.391  1.00  0.00           C  
ATOM   2827  CG  HIS C  54     -20.479   7.182 -66.440  1.00  0.00           C  
ATOM   2828  CD2 HIS C  54     -21.348   6.252 -66.900  1.00  0.00           C  
ATOM   2829  ND1 HIS C  54     -19.383   6.487 -65.974  1.00  0.00           N  
ATOM   2830  CE1 HIS C  54     -19.583   5.191 -66.144  1.00  0.00           C  
ATOM   2831  NE2 HIS C  54     -20.767   5.023 -66.705  1.00  0.00           N  
ATOM   2832  N   GLY C  55     -19.493  11.711 -66.628  1.00  0.00           N  
ATOM   2833  CA  GLY C  55     -19.729  13.165 -66.523  1.00  0.00           C  
ATOM   2834  C   GLY C  55     -20.613  13.520 -65.347  1.00  0.00           C  
ATOM   2835  O   GLY C  55     -20.384  14.642 -64.890  1.00  0.00           O  
ATOM   2836  N   LYS C  56     -21.547  12.704 -64.954  1.00  0.00           N  
ATOM   2837  CA  LYS C  56     -22.400  13.045 -63.806  1.00  0.00           C  
ATOM   2838  C   LYS C  56     -22.187  12.110 -62.608  1.00  0.00           C  
ATOM   2839  O   LYS C  56     -21.647  11.077 -62.704  1.00  0.00           O  
ATOM   2840  CB  LYS C  56     -23.872  13.024 -64.220  1.00  0.00           C  
ATOM   2841  CG  LYS C  56     -24.227  14.004 -65.330  1.00  0.00           C  
ATOM   2842  CD  LYS C  56     -24.078  15.444 -64.865  1.00  0.00           C  
ATOM   2843  CE  LYS C  56     -24.502  16.424 -65.950  1.00  0.00           C  
ATOM   2844  NZ  LYS C  56     -24.415  17.836 -65.489  1.00  0.00           N1+
ATOM   2845  N   TRP C  57     -22.514  12.581 -61.413  1.00  0.00           N  
ATOM   2846  CA  TRP C  57     -22.234  11.780 -60.173  1.00  0.00           C  
ATOM   2847  C   TRP C  57     -23.164  10.578 -60.072  1.00  0.00           C  
ATOM   2848  O   TRP C  57     -24.340  10.674 -60.491  1.00  0.00           O  
ATOM   2849  CB  TRP C  57     -22.393  12.638 -58.916  1.00  0.00           C  
ATOM   2850  CG  TRP C  57     -21.335  13.690 -58.772  1.00  0.00           C  
ATOM   2851  CD1 TRP C  57     -21.457  15.015 -59.066  1.00  0.00           C  
ATOM   2852  CD2 TRP C  57     -19.981  13.509 -58.292  1.00  0.00           C  
ATOM   2853  CE2 TRP C  57     -19.364  14.762 -58.330  1.00  0.00           C  
ATOM   2854  CE3 TRP C  57     -19.254  12.401 -57.839  1.00  0.00           C  
ATOM   2855  NE1 TRP C  57     -20.278  15.668 -58.806  1.00  0.00           N  
ATOM   2856  CZ2 TRP C  57     -18.048  14.945 -57.934  1.00  0.00           C  
ATOM   2857  CZ3 TRP C  57     -17.935  12.584 -57.441  1.00  0.00           C  
ATOM   2858  CH2 TRP C  57     -17.349  13.824 -57.487  1.00  0.00           C  
ATOM   2859  N   PRO C  58     -22.598   9.400 -59.509  1.00  0.00           N  
ATOM   2860  CA  PRO C  58     -23.503   8.224 -59.377  1.00  0.00           C  
ATOM   2861  C   PRO C  58     -24.532   8.397 -58.256  1.00  0.00           C  
ATOM   2862  O   PRO C  58     -24.276   9.118 -57.296  1.00  0.00           O  
ATOM   2863  CB  PRO C  58     -22.536   7.078 -59.066  1.00  0.00           C  
ATOM   2864  CG  PRO C  58     -21.413   7.735 -58.338  1.00  0.00           C  
ATOM   2865  CD  PRO C  58     -21.238   9.058 -59.035  1.00  0.00           C  
ATOM   2866  N   GLU C  59     -25.704   7.837 -58.387  1.00  0.00           N  
ATOM   2867  CA  GLU C  59     -26.814   7.921 -57.399  1.00  0.00           C  
ATOM   2868  C   GLU C  59     -26.618   7.232 -56.078  1.00  0.00           C  
ATOM   2869  O   GLU C  59     -26.699   7.786 -54.985  1.00  0.00           O  
ATOM   2870  CB  GLU C  59     -28.095   7.361 -58.021  1.00  0.00           C  
ATOM   2871  CG  GLU C  59     -29.311   7.409 -57.108  1.00  0.00           C  
ATOM   2872  CD  GLU C  59     -30.555   6.874 -57.761  1.00  0.00           C  
ATOM   2873  OE1 GLU C  59     -30.494   6.525 -58.915  1.00  0.00           O  
ATOM   2874  OE2 GLU C  59     -31.568   6.813 -57.104  1.00  0.00           O1-
ATOM   2875  N   ASN C  60     -26.248   5.945 -56.081  1.00  0.00           N  
ATOM   2876  CA  ASN C  60     -26.066   5.008 -54.961  1.00  0.00           C  
ATOM   2877  C   ASN C  60     -24.960   4.019 -55.228  1.00  0.00           C  
ATOM   2878  O   ASN C  60     -24.209   3.943 -56.199  1.00  0.00           O  
ATOM   2879  CB  ASN C  60     -27.357   4.271 -54.657  1.00  0.00           C  
ATOM   2880  CG  ASN C  60     -27.817   3.414 -55.804  1.00  0.00           C  
ATOM   2881  ND2 ASN C  60     -29.110   3.340 -55.996  1.00  0.00           N  
ATOM   2882  OD1 ASN C  60     -27.001   2.820 -56.517  1.00  0.00           O  
ATOM   2883  N   ASN C  61     -24.774   3.086 -54.248  1.00  0.00           N  
ATOM   2884  CA  ASN C  61     -23.745   2.031 -54.226  1.00  0.00           C  
ATOM   2885  C   ASN C  61     -23.765   1.153 -55.471  1.00  0.00           C  
ATOM   2886  O   ASN C  61     -22.678   0.831 -55.984  1.00  0.00           O  
ATOM   2887  CB  ASN C  61     -23.899   1.171 -52.985  1.00  0.00           C  
ATOM   2888  CG  ASN C  61     -23.466   1.881 -51.732  1.00  0.00           C  
ATOM   2889  ND2 ASN C  61     -23.682   1.257 -50.603  1.00  0.00           N  
ATOM   2890  OD1 ASN C  61     -22.935   2.997 -51.788  1.00  0.00           O  
ATOM   2891  N   THR C  62     -24.894   0.774 -55.959  1.00  0.00           N  
ATOM   2892  CA  THR C  62     -25.060  -0.016 -57.241  1.00  0.00           C  
ATOM   2893  C   THR C  62     -24.838   0.683 -58.599  1.00  0.00           C  
ATOM   2894  O   THR C  62     -24.341   0.167 -59.617  1.00  0.00           O  
ATOM   2895  CB  THR C  62     -26.471  -0.631 -57.283  1.00  0.00           C  
ATOM   2896  CG2 THR C  62     -26.705  -1.513 -56.066  1.00  0.00           C  
ATOM   2897  OG1 THR C  62     -27.450   0.416 -57.304  1.00  0.00           O  
ATOM   2898  N   SER C  63     -25.013   1.980 -58.543  1.00  0.00           N  
ATOM   2899  CA  SER C  63     -24.625   2.854 -59.660  1.00  0.00           C  
ATOM   2900  C   SER C  63     -23.195   3.269 -59.642  1.00  0.00           C  
ATOM   2901  O   SER C  63     -22.561   3.304 -60.711  1.00  0.00           O  
ATOM   2902  CB  SER C  63     -25.485   4.103 -59.663  1.00  0.00           C  
ATOM   2903  OG  SER C  63     -25.192   4.917 -58.561  1.00  0.00           O  
ATOM   2904  N   ALA C  64     -22.511   3.343 -58.501  1.00  0.00           N  
ATOM   2905  CA  ALA C  64     -21.061   3.703 -58.391  1.00  0.00           C  
ATOM   2906  C   ALA C  64     -20.088   2.565 -58.656  1.00  0.00           C  
ATOM   2907  O   ALA C  64     -18.878   2.751 -58.822  1.00  0.00           O  
ATOM   2908  CB  ALA C  64     -20.913   4.271 -56.926  1.00  0.00           C  
ATOM   2909  N   GLY C  65     -20.645   1.307 -58.658  1.00  0.00           N  
ATOM   2910  CA  GLY C  65     -19.827   0.047 -58.842  1.00  0.00           C  
ATOM   2911  C   GLY C  65     -19.330  -0.644 -57.558  1.00  0.00           C  
ATOM   2912  O   GLY C  65     -18.319  -1.380 -57.626  1.00  0.00           O  
ATOM   2913  N   VAL C  66     -19.978  -0.475 -56.404  1.00  0.00           N  
ATOM   2914  CA  VAL C  66     -19.519  -1.134 -55.192  1.00  0.00           C  
ATOM   2915  C   VAL C  66     -20.546  -2.096 -54.484  1.00  0.00           C  
ATOM   2916  O   VAL C  66     -21.665  -2.364 -55.076  1.00  0.00           O  
ATOM   2917  CB  VAL C  66     -19.088  -0.042 -54.194  1.00  0.00           C  
ATOM   2918  CG1 VAL C  66     -17.946   0.783 -54.768  1.00  0.00           C  
ATOM   2919  CG2 VAL C  66     -20.275   0.844 -53.851  1.00  0.00           C  
ATOM   2920  N   ALA C  67     -20.155  -2.667 -53.306  1.00  0.00           N  
ATOM   2921  CA  ALA C  67     -21.043  -3.571 -52.626  1.00  0.00           C  
ATOM   2922  C   ALA C  67     -22.455  -2.932 -52.542  1.00  0.00           C  
ATOM   2923  O   ALA C  67     -22.667  -1.820 -52.035  1.00  0.00           O  
ATOM   2924  CB  ALA C  67     -20.507  -3.960 -51.234  1.00  0.00           C  
ATOM   2925  N   SER C  68     -23.489  -3.738 -52.867  1.00  0.00           N  
ATOM   2926  CA  SER C  68     -24.833  -3.301 -53.104  1.00  0.00           C  
ATOM   2927  C   SER C  68     -25.514  -2.832 -51.812  1.00  0.00           C  
ATOM   2928  O   SER C  68     -26.432  -2.047 -51.886  1.00  0.00           O  
ATOM   2929  CB  SER C  68     -25.626  -4.428 -53.736  1.00  0.00           C  
ATOM   2930  OG  SER C  68     -25.767  -5.502 -52.848  1.00  0.00           O  
ATOM   2931  N   SER C  69     -25.193  -3.418 -50.666  1.00  0.00           N  
ATOM   2932  CA  SER C  69     -25.808  -2.944 -49.463  1.00  0.00           C  
ATOM   2933  C   SER C  69     -24.955  -2.089 -48.589  1.00  0.00           C  
ATOM   2934  O   SER C  69     -23.803  -2.446 -48.390  1.00  0.00           O  
ATOM   2935  CB  SER C  69     -26.288  -4.133 -48.654  1.00  0.00           C  
ATOM   2936  OG  SER C  69     -26.769  -3.728 -47.402  1.00  0.00           O  
ATOM   2937  N   PRO C  70     -25.446  -1.046 -47.938  1.00  0.00           N  
ATOM   2938  CA  PRO C  70     -24.715  -0.279 -46.986  1.00  0.00           C  
ATOM   2939  C   PRO C  70     -24.086  -1.136 -45.871  1.00  0.00           C  
ATOM   2940  O   PRO C  70     -23.117  -0.747 -45.186  1.00  0.00           O  
ATOM   2941  CB  PRO C  70     -25.798   0.658 -46.442  1.00  0.00           C  
ATOM   2942  CG  PRO C  70     -26.752   0.811 -47.577  1.00  0.00           C  
ATOM   2943  CD  PRO C  70     -26.788  -0.549 -48.222  1.00  0.00           C  
ATOM   2944  N   THR C  71     -24.636  -2.311 -45.598  1.00  0.00           N  
ATOM   2945  CA  THR C  71     -24.148  -3.234 -44.537  1.00  0.00           C  
ATOM   2946  C   THR C  71     -23.175  -4.331 -44.948  1.00  0.00           C  
ATOM   2947  O   THR C  71     -22.635  -5.206 -44.228  1.00  0.00           O  
ATOM   2948  CB  THR C  71     -25.346  -3.914 -43.848  1.00  0.00           C  
ATOM   2949  CG2 THR C  71     -26.275  -2.873 -43.242  1.00  0.00           C  
ATOM   2950  OG1 THR C  71     -26.071  -4.695 -44.806  1.00  0.00           O  
ATOM   2951  N   ASP C  72     -22.919  -4.438 -46.241  1.00  0.00           N  
ATOM   2952  CA  ASP C  72     -21.995  -5.488 -46.838  1.00  0.00           C  
ATOM   2953  C   ASP C  72     -20.578  -5.330 -46.289  1.00  0.00           C  
ATOM   2954  O   ASP C  72     -19.951  -6.326 -45.954  1.00  0.00           O  
ATOM   2955  CB  ASP C  72     -21.951  -5.396 -48.365  1.00  0.00           C  
ATOM   2956  CG  ASP C  72     -23.197  -5.968 -49.029  1.00  0.00           C  
ATOM   2957  OD1 ASP C  72     -23.890  -6.726 -48.393  1.00  0.00           O  
ATOM   2958  OD2 ASP C  72     -23.443  -5.640 -50.165  1.00  0.00           O1-
ATOM   2959  N   ILE C  73     -20.213  -4.084 -46.006  1.00  0.00           N  
ATOM   2960  CA  ILE C  73     -18.945  -3.654 -45.411  1.00  0.00           C  
ATOM   2961  C   ILE C  73     -19.141  -3.084 -43.945  1.00  0.00           C  
ATOM   2962  O   ILE C  73     -18.329  -2.299 -43.440  1.00  0.00           O  
ATOM   2963  CB  ILE C  73     -18.279  -2.594 -46.306  1.00  0.00           C  
ATOM   2964  CG1 ILE C  73     -19.200  -1.382 -46.475  1.00  0.00           C  
ATOM   2965  CG2 ILE C  73     -17.923  -3.188 -47.660  1.00  0.00           C  
ATOM   2966  CD1 ILE C  73     -18.536  -0.198 -47.140  1.00  0.00           C  
ATOM   2967  N   LYS C  74     -20.208  -3.542 -43.333  1.00  0.00           N  
ATOM   2968  CA  LYS C  74     -20.536  -3.154 -41.935  1.00  0.00           C  
ATOM   2969  C   LYS C  74     -19.375  -3.445 -40.980  1.00  0.00           C  
ATOM   2970  O   LYS C  74     -18.866  -4.587 -40.949  1.00  0.00           O  
ATOM   2971  CB  LYS C  74     -21.792  -3.881 -41.453  1.00  0.00           C  
ATOM   2972  CG  LYS C  74     -22.255  -3.480 -40.058  1.00  0.00           C  
ATOM   2973  CD  LYS C  74     -23.535  -4.205 -39.671  1.00  0.00           C  
ATOM   2974  CE  LYS C  74     -23.999  -3.805 -38.278  1.00  0.00           C  
ATOM   2975  NZ  LYS C  74     -25.214  -4.555 -37.860  1.00  0.00           N1+
ATOM   2976  N   GLY C  75     -18.996  -2.407 -40.234  1.00  0.00           N  
ATOM   2977  CA  GLY C  75     -17.808  -2.482 -39.380  1.00  0.00           C  
ATOM   2978  C   GLY C  75     -17.945  -2.778 -37.882  1.00  0.00           C  
ATOM   2979  O   GLY C  75     -18.978  -3.301 -37.626  1.00  0.00           O  
ATOM   2980  N   LYS C  76     -16.968  -2.578 -36.981  1.00  0.00           N  
ATOM   2981  CA  LYS C  76     -17.037  -2.834 -35.553  1.00  0.00           C  
ATOM   2982  C   LYS C  76     -17.950  -1.802 -34.898  1.00  0.00           C  
ATOM   2983  O   LYS C  76     -18.780  -2.207 -34.104  1.00  0.00           O  
ATOM   2984  CB  LYS C  76     -15.643  -2.798 -34.924  1.00  0.00           C  
ATOM   2985  CG  LYS C  76     -15.610  -3.168 -33.447  1.00  0.00           C  
ATOM   2986  CD  LYS C  76     -14.181  -3.286 -32.938  1.00  0.00           C  
ATOM   2987  CE  LYS C  76     -14.141  -3.829 -31.518  1.00  0.00           C  
ATOM   2988  NZ  LYS C  76     -14.718  -2.868 -30.538  1.00  0.00           N1+
ATOM   2989  N   TYR C  77     -17.892  -0.564 -35.436  1.00  0.00           N  
ATOM   2990  CA  TYR C  77     -18.560   0.603 -34.855  1.00  0.00           C  
ATOM   2991  C   TYR C  77     -19.551   1.155 -35.843  1.00  0.00           C  
ATOM   2992  O   TYR C  77     -20.639   1.581 -35.465  1.00  0.00           O  
ATOM   2993  CB  TYR C  77     -17.550   1.681 -34.453  1.00  0.00           C  
ATOM   2994  CG  TYR C  77     -16.489   1.195 -33.491  1.00  0.00           C  
ATOM   2995  CD1 TYR C  77     -15.176   1.059 -33.918  1.00  0.00           C  
ATOM   2996  CD2 TYR C  77     -16.828   0.886 -32.183  1.00  0.00           C  
ATOM   2997  CE1 TYR C  77     -14.206   0.616 -33.040  1.00  0.00           C  
ATOM   2998  CE2 TYR C  77     -15.859   0.443 -31.304  1.00  0.00           C  
ATOM   2999  CZ  TYR C  77     -14.553   0.307 -31.729  1.00  0.00           C  
ATOM   3000  OH  TYR C  77     -13.587  -0.134 -30.854  1.00  0.00           O  
ATOM   3001  N   VAL C  78     -19.159   1.202 -37.160  1.00  0.00           N  
ATOM   3002  CA  VAL C  78     -19.945   1.689 -38.304  1.00  0.00           C  
ATOM   3003  C   VAL C  78     -21.044   0.662 -38.739  1.00  0.00           C  
ATOM   3004  O   VAL C  78     -20.786  -0.574 -38.990  1.00  0.00           O  
ATOM   3005  CB  VAL C  78     -19.008   1.976 -39.493  1.00  0.00           C  
ATOM   3006  CG1 VAL C  78     -19.810   2.420 -40.707  1.00  0.00           C  
ATOM   3007  CG2 VAL C  78     -17.988   3.035 -39.103  1.00  0.00           C  
ATOM   3008  N   LYS C  79     -22.225   1.233 -38.867  1.00  0.00           N  
ATOM   3009  CA  LYS C  79     -23.408   0.533 -39.162  1.00  0.00           C  
ATOM   3010  C   LYS C  79     -23.645   0.444 -40.675  1.00  0.00           C  
ATOM   3011  O   LYS C  79     -23.880  -0.653 -41.233  1.00  0.00           O  
ATOM   3012  CB  LYS C  79     -24.587   1.210 -38.461  1.00  0.00           C  
ATOM   3013  CG  LYS C  79     -25.911   0.470 -38.602  1.00  0.00           C  
ATOM   3014  CD  LYS C  79     -27.016   1.160 -37.815  1.00  0.00           C  
ATOM   3015  CE  LYS C  79     -28.344   0.434 -37.971  1.00  0.00           C  
ATOM   3016  NZ  LYS C  79     -29.435   1.100 -37.209  1.00  0.00           N1+
ATOM   3017  N   GLU C  80     -23.709   1.602 -41.334  1.00  0.00           N  
ATOM   3018  CA  GLU C  80     -24.015   1.623 -42.787  1.00  0.00           C  
ATOM   3019  C   GLU C  80     -23.103   2.621 -43.544  1.00  0.00           C  
ATOM   3020  O   GLU C  80     -22.995   3.751 -43.094  1.00  0.00           O  
ATOM   3021  CB  GLU C  80     -25.484   1.986 -43.016  1.00  0.00           C  
ATOM   3022  CG  GLU C  80     -26.470   0.896 -42.622  1.00  0.00           C  
ATOM   3023  CD  GLU C  80     -27.902   1.295 -42.845  1.00  0.00           C  
ATOM   3024  OE1 GLU C  80     -28.139   2.435 -43.165  1.00  0.00           O  
ATOM   3025  OE2 GLU C  80     -28.761   0.458 -42.696  1.00  0.00           O1-
ATOM   3026  N   VAL C  81     -22.639   2.267 -44.786  1.00  0.00           N  
ATOM   3027  CA  VAL C  81     -21.944   3.227 -45.599  1.00  0.00           C  
ATOM   3028  C   VAL C  81     -22.582   3.196 -47.003  1.00  0.00           C  
ATOM   3029  O   VAL C  81     -22.570   2.135 -47.651  1.00  0.00           O  
ATOM   3030  CB  VAL C  81     -20.442   2.894 -45.673  1.00  0.00           C  
ATOM   3031  CG1 VAL C  81     -19.717   3.900 -46.554  1.00  0.00           C  
ATOM   3032  CG2 VAL C  81     -19.847   2.873 -44.274  1.00  0.00           C  
ATOM   3033  N   GLU C  82     -22.996   4.347 -47.493  1.00  0.00           N  
ATOM   3034  CA  GLU C  82     -23.797   4.464 -48.744  1.00  0.00           C  
ATOM   3035  C   GLU C  82     -23.516   5.853 -49.502  1.00  0.00           C  
ATOM   3036  O   GLU C  82     -23.357   6.907 -48.896  1.00  0.00           O  
ATOM   3037  CB  GLU C  82     -25.285   4.327 -48.415  1.00  0.00           C  
ATOM   3038  CG  GLU C  82     -26.200   4.317 -49.631  1.00  0.00           C  
ATOM   3039  CD  GLU C  82     -27.651   4.157 -49.271  1.00  0.00           C  
ATOM   3040  OE1 GLU C  82     -27.939   3.975 -48.112  1.00  0.00           O  
ATOM   3041  OE2 GLU C  82     -28.473   4.218 -50.155  1.00  0.00           O1-
ATOM   3042  N   VAL C  83     -23.397   5.680 -50.838  1.00  0.00           N  
ATOM   3043  CA  VAL C  83     -23.334   6.833 -51.783  1.00  0.00           C  
ATOM   3044  C   VAL C  83     -24.689   7.522 -51.933  1.00  0.00           C  
ATOM   3045  O   VAL C  83     -25.716   6.862 -52.088  1.00  0.00           O  
ATOM   3046  CB  VAL C  83     -22.860   6.367 -53.172  1.00  0.00           C  
ATOM   3047  CG1 VAL C  83     -22.906   7.520 -54.164  1.00  0.00           C  
ATOM   3048  CG2 VAL C  83     -21.454   5.795 -53.075  1.00  0.00           C  
ATOM   3049  N   LYS C  84     -24.669   8.843 -51.750  1.00  0.00           N  
ATOM   3050  CA  LYS C  84     -25.852   9.673 -51.899  1.00  0.00           C  
ATOM   3051  C   LYS C  84     -25.540  10.745 -53.022  1.00  0.00           C  
ATOM   3052  O   LYS C  84     -24.989  11.816 -52.681  1.00  0.00           O  
ATOM   3053  CB  LYS C  84     -26.222  10.332 -50.569  1.00  0.00           C  
ATOM   3054  CG  LYS C  84     -26.519   9.351 -49.442  1.00  0.00           C  
ATOM   3055  CD  LYS C  84     -27.795   8.568 -49.712  1.00  0.00           C  
ATOM   3056  CE  LYS C  84     -28.152   7.667 -48.539  1.00  0.00           C  
ATOM   3057  NZ  LYS C  84     -29.386   6.877 -48.799  1.00  0.00           N1+
ATOM   3058  N   ASN C  85     -25.891  10.488 -54.281  1.00  0.00           N  
ATOM   3059  CA  ASN C  85     -25.720  11.331 -55.498  1.00  0.00           C  
ATOM   3060  C   ASN C  85     -24.315  11.986 -55.820  1.00  0.00           C  
ATOM   3061  O   ASN C  85     -24.237  13.139 -56.239  1.00  0.00           O  
ATOM   3062  CB  ASN C  85     -26.768  12.427 -55.444  1.00  0.00           C  
ATOM   3063  CG  ASN C  85     -28.170  11.890 -55.523  1.00  0.00           C  
ATOM   3064  ND2 ASN C  85     -29.070  12.497 -54.791  1.00  0.00           N  
ATOM   3065  OD1 ASN C  85     -28.439  10.925 -56.246  1.00  0.00           O  
ATOM   3066  N   GLY C  86     -23.232  11.185 -55.548  1.00  0.00           N  
ATOM   3067  CA  GLY C  86     -21.832  11.520 -55.595  1.00  0.00           C  
ATOM   3068  C   GLY C  86     -21.124  11.820 -54.256  1.00  0.00           C  
ATOM   3069  O   GLY C  86     -19.922  12.005 -54.303  1.00  0.00           O  
ATOM   3070  N   VAL C  87     -21.844  11.842 -53.089  1.00  0.00           N  
ATOM   3071  CA  VAL C  87     -21.295  12.024 -51.743  1.00  0.00           C  
ATOM   3072  C   VAL C  87     -21.438  10.755 -50.924  1.00  0.00           C  
ATOM   3073  O   VAL C  87     -22.552  10.315 -50.648  1.00  0.00           O  
ATOM   3074  CB  VAL C  87     -22.012  13.179 -51.017  1.00  0.00           C  
ATOM   3075  CG1 VAL C  87     -21.467  13.342 -49.607  1.00  0.00           C  
ATOM   3076  CG2 VAL C  87     -21.851  14.467 -51.810  1.00  0.00           C  
ATOM   3077  N   VAL C  88     -20.305  10.196 -50.438  1.00  0.00           N  
ATOM   3078  CA  VAL C  88     -20.193   8.941 -49.609  1.00  0.00           C  
ATOM   3079  C   VAL C  88     -20.418   9.195 -48.121  1.00  0.00           C  
ATOM   3080  O   VAL C  88     -19.709   9.911 -47.519  1.00  0.00           O  
ATOM   3081  CB  VAL C  88     -18.803   8.299 -49.783  1.00  0.00           C  
ATOM   3082  CG1 VAL C  88     -18.678   7.056 -48.915  1.00  0.00           C  
ATOM   3083  CG2 VAL C  88     -18.569   7.961 -51.247  1.00  0.00           C  
ATOM   3084  N   THR C  89     -21.521   8.721 -47.594  1.00  0.00           N  
ATOM   3085  CA  THR C  89     -21.953   8.919 -46.240  1.00  0.00           C  
ATOM   3086  C   THR C  89     -21.647   7.703 -45.430  1.00  0.00           C  
ATOM   3087  O   THR C  89     -21.622   6.573 -45.962  1.00  0.00           O  
ATOM   3088  CB  THR C  89     -23.459   9.233 -46.166  1.00  0.00           C  
ATOM   3089  CG2 THR C  89     -23.793  10.447 -47.018  1.00  0.00           C  
ATOM   3090  OG1 THR C  89     -24.209   8.104 -46.634  1.00  0.00           O  
ATOM   3091  N   ALA C  90     -21.544   7.824 -44.102  1.00  0.00           N  
ATOM   3092  CA  ALA C  90     -21.273   6.788 -43.128  1.00  0.00           C  
ATOM   3093  C   ALA C  90     -22.080   7.027 -41.831  1.00  0.00           C  
ATOM   3094  O   ALA C  90     -22.025   8.087 -41.272  1.00  0.00           O  
ATOM   3095  CB  ALA C  90     -19.704   6.639 -43.019  1.00  0.00           C  
ATOM   3096  N   THR C  91     -22.881   6.043 -41.416  1.00  0.00           N  
ATOM   3097  CA  THR C  91     -23.699   6.116 -40.161  1.00  0.00           C  
ATOM   3098  C   THR C  91     -23.163   5.066 -39.075  1.00  0.00           C  
ATOM   3099  O   THR C  91     -23.031   3.839 -39.367  1.00  0.00           O  
ATOM   3100  CB  THR C  91     -25.187   5.858 -40.463  1.00  0.00           C  
ATOM   3101  CG2 THR C  91     -26.006   5.897 -39.183  1.00  0.00           C  
ATOM   3102  OG1 THR C  91     -25.673   6.857 -41.368  1.00  0.00           O  
ATOM   3103  N   MET C  92     -23.037   5.458 -37.817  1.00  0.00           N  
ATOM   3104  CA  MET C  92     -22.560   4.625 -36.682  1.00  0.00           C  
ATOM   3105  C   MET C  92     -23.652   3.729 -35.942  1.00  0.00           C  
ATOM   3106  O   MET C  92     -24.830   3.870 -36.052  1.00  0.00           O  
ATOM   3107  CB  MET C  92     -21.881   5.550 -35.674  1.00  0.00           C  
ATOM   3108  CG  MET C  92     -20.811   6.454 -36.269  1.00  0.00           C  
ATOM   3109  SD  MET C  92     -19.476   5.528 -37.053  1.00  0.00           S  
ATOM   3110  CE  MET C  92     -18.674   4.813 -35.622  1.00  0.00           C  
ATOM   3111  N   LEU C  93     -23.280   2.638 -35.219  1.00  0.00           N  
ATOM   3112  CA  LEU C  93     -24.180   1.812 -34.401  1.00  0.00           C  
ATOM   3113  C   LEU C  93     -24.749   2.621 -33.187  1.00  0.00           C  
ATOM   3114  O   LEU C  93     -24.101   3.534 -32.606  1.00  0.00           O  
ATOM   3115  CB  LEU C  93     -23.433   0.569 -33.903  1.00  0.00           C  
ATOM   3116  CG  LEU C  93     -23.040  -0.448 -34.983  1.00  0.00           C  
ATOM   3117  CD1 LEU C  93     -22.122  -1.502 -34.378  1.00  0.00           C  
ATOM   3118  CD2 LEU C  93     -24.294  -1.083 -35.563  1.00  0.00           C  
ATOM   3119  N   SER C  94     -25.983   2.328 -32.836  1.00  0.00           N  
ATOM   3120  CA  SER C  94     -26.693   3.021 -31.696  1.00  0.00           C  
ATOM   3121  C   SER C  94     -26.239   2.692 -30.304  1.00  0.00           C  
ATOM   3122  O   SER C  94     -26.666   3.338 -29.314  1.00  0.00           O  
ATOM   3123  CB  SER C  94     -28.178   2.720 -31.761  1.00  0.00           C  
ATOM   3124  OG  SER C  94     -28.428   1.365 -31.507  1.00  0.00           O  
ATOM   3125  N   SER C  95     -25.398   1.711 -30.124  1.00  0.00           N  
ATOM   3126  CA  SER C  95     -24.815   1.235 -28.885  1.00  0.00           C  
ATOM   3127  C   SER C  95     -23.320   0.893 -28.791  1.00  0.00           C  
ATOM   3128  O   SER C  95     -22.808   0.292 -29.698  1.00  0.00           O  
ATOM   3129  CB  SER C  95     -25.598   0.003 -28.475  1.00  0.00           C  
ATOM   3130  OG  SER C  95     -25.063  -0.568 -27.313  1.00  0.00           O  
ATOM   3131  N   GLY C  96     -22.586   1.543 -27.845  1.00  0.00           N  
ATOM   3132  CA  GLY C  96     -21.125   1.427 -27.599  1.00  0.00           C  
ATOM   3133  C   GLY C  96     -20.256   2.445 -28.334  1.00  0.00           C  
ATOM   3134  O   GLY C  96     -19.123   2.589 -27.959  1.00  0.00           O  
ATOM   3135  N   VAL C  97     -20.759   3.111 -29.328  1.00  0.00           N  
ATOM   3136  CA  VAL C  97     -19.962   4.087 -30.104  1.00  0.00           C  
ATOM   3137  C   VAL C  97     -19.875   5.404 -29.282  1.00  0.00           C  
ATOM   3138  O   VAL C  97     -20.697   6.272 -29.582  1.00  0.00           O  
ATOM   3139  CB  VAL C  97     -20.604   4.358 -31.477  1.00  0.00           C  
ATOM   3140  CG1 VAL C  97     -19.772   5.357 -32.266  1.00  0.00           C  
ATOM   3141  CG2 VAL C  97     -20.753   3.054 -32.245  1.00  0.00           C  
ATOM   3142  N   ASN C  98     -19.011   5.416 -28.245  1.00  0.00           N  
ATOM   3143  CA  ASN C  98     -18.641   6.455 -27.389  1.00  0.00           C  
ATOM   3144  C   ASN C  98     -19.707   6.638 -26.282  1.00  0.00           C  
ATOM   3145  O   ASN C  98     -19.972   5.757 -25.457  1.00  0.00           O  
ATOM   3146  CB  ASN C  98     -18.425   7.724 -28.192  1.00  0.00           C  
ATOM   3147  CG  ASN C  98     -17.876   8.849 -27.359  1.00  0.00           C  
ATOM   3148  ND2 ASN C  98     -16.583   8.848 -27.157  1.00  0.00           N  
ATOM   3149  OD1 ASN C  98     -18.624   9.719 -26.898  1.00  0.00           O  
ATOM   3150  N   ASN C  99     -20.397   7.767 -26.320  1.00  0.00           N  
ATOM   3151  CA  ASN C  99     -21.395   8.397 -25.403  1.00  0.00           C  
ATOM   3152  C   ASN C  99     -22.250   9.514 -26.098  1.00  0.00           C  
ATOM   3153  O   ASN C  99     -23.478   9.423 -26.007  1.00  0.00           O  
ATOM   3154  CB  ASN C  99     -20.691   8.957 -24.181  1.00  0.00           C  
ATOM   3155  CG  ASN C  99     -21.651   9.517 -23.168  1.00  0.00           C  
ATOM   3156  ND2 ASN C  99     -21.488  10.774 -22.840  1.00  0.00           N  
ATOM   3157  OD1 ASN C  99     -22.542   8.811 -22.682  1.00  0.00           O  
ATOM   3158  N   GLU C 100     -21.584  10.536 -26.712  1.00  0.00           N  
ATOM   3159  CA  GLU C 100     -22.190  11.673 -27.439  1.00  0.00           C  
ATOM   3160  C   GLU C 100     -22.486  11.425 -28.888  1.00  0.00           C  
ATOM   3161  O   GLU C 100     -23.400  12.026 -29.479  1.00  0.00           O  
ATOM   3162  CB  GLU C 100     -21.278  12.899 -27.345  1.00  0.00           C  
ATOM   3163  CG  GLU C 100     -21.178  13.502 -25.951  1.00  0.00           C  
ATOM   3164  CD  GLU C 100     -20.278  14.705 -25.897  1.00  0.00           C  
ATOM   3165  OE1 GLU C 100     -19.135  14.585 -26.266  1.00  0.00           O  
ATOM   3166  OE2 GLU C 100     -20.735  15.746 -25.486  1.00  0.00           O1-
ATOM   3167  N   ILE C 101     -21.785  10.468 -29.554  1.00  0.00           N  
ATOM   3168  CA  ILE C 101     -21.911  10.176 -31.031  1.00  0.00           C  
ATOM   3169  C   ILE C 101     -22.522   8.751 -31.322  1.00  0.00           C  
ATOM   3170  O   ILE C 101     -22.419   8.299 -32.443  1.00  0.00           O  
ATOM   3171  CB  ILE C 101     -20.538  10.286 -31.721  1.00  0.00           C  
ATOM   3172  CG1 ILE C 101     -19.550   9.292 -31.104  1.00  0.00           C  
ATOM   3173  CG2 ILE C 101     -20.004  11.706 -31.619  1.00  0.00           C  
ATOM   3174  CD1 ILE C 101     -18.256   9.160 -31.874  1.00  0.00           C  
ATOM   3175  N   LYS C 102     -23.243   8.097 -30.434  1.00  0.00           N  
ATOM   3176  CA  LYS C 102     -23.904   6.824 -30.752  1.00  0.00           C  
ATOM   3177  C   LYS C 102     -24.977   6.976 -31.799  1.00  0.00           C  
ATOM   3178  O   LYS C 102     -25.773   7.846 -31.693  1.00  0.00           O  
ATOM   3179  CB  LYS C 102     -24.511   6.205 -29.492  1.00  0.00           C  
ATOM   3180  CG  LYS C 102     -23.488   5.751 -28.458  1.00  0.00           C  
ATOM   3181  CD  LYS C 102     -24.166   5.153 -27.235  1.00  0.00           C  
ATOM   3182  CE  LYS C 102     -23.149   4.764 -26.172  1.00  0.00           C  
ATOM   3183  NZ  LYS C 102     -23.801   4.218 -24.951  1.00  0.00           N1+
ATOM   3184  N   GLY C 103     -24.956   6.199 -32.912  1.00  0.00           N  
ATOM   3185  CA  GLY C 103     -25.922   6.311 -33.998  1.00  0.00           C  
ATOM   3186  C   GLY C 103     -25.814   7.469 -34.939  1.00  0.00           C  
ATOM   3187  O   GLY C 103     -26.655   7.607 -35.817  1.00  0.00           O  
ATOM   3188  N   LYS C 104     -24.728   8.271 -34.880  1.00  0.00           N  
ATOM   3189  CA  LYS C 104     -24.514   9.471 -35.660  1.00  0.00           C  
ATOM   3190  C   LYS C 104     -23.765   9.273 -37.056  1.00  0.00           C  
ATOM   3191  O   LYS C 104     -23.297   8.170 -37.365  1.00  0.00           O  
ATOM   3192  CB  LYS C 104     -23.749  10.465 -34.786  1.00  0.00           C  
ATOM   3193  CG  LYS C 104     -24.407  10.759 -33.444  1.00  0.00           C  
ATOM   3194  CD  LYS C 104     -25.792  11.362 -33.628  1.00  0.00           C  
ATOM   3195  CE  LYS C 104     -26.434  11.695 -32.290  1.00  0.00           C  
ATOM   3196  NZ  LYS C 104     -27.846  12.137 -32.445  1.00  0.00           N1+
ATOM   3197  N   LYS C 105     -23.669  10.361 -37.895  1.00  0.00           N  
ATOM   3198  CA  LYS C 105     -23.146  10.304 -39.280  1.00  0.00           C  
ATOM   3199  C   LYS C 105     -22.163  11.416 -39.667  1.00  0.00           C  
ATOM   3200  O   LYS C 105     -21.967  12.449 -38.983  1.00  0.00           O  
ATOM   3201  CB  LYS C 105     -24.315  10.319 -40.266  1.00  0.00           C  
ATOM   3202  CG  LYS C 105     -25.229  11.531 -40.141  1.00  0.00           C  
ATOM   3203  CD  LYS C 105     -26.427  11.418 -41.072  1.00  0.00           C  
ATOM   3204  CE  LYS C 105     -27.384  12.587 -40.888  1.00  0.00           C  
ATOM   3205  NZ  LYS C 105     -28.610  12.438 -41.718  1.00  0.00           N1+
ATOM   3206  N   LEU C 106     -21.344  11.134 -40.708  1.00  0.00           N  
ATOM   3207  CA  LEU C 106     -20.323  11.906 -41.451  1.00  0.00           C  
ATOM   3208  C   LEU C 106     -20.552  11.707 -42.989  1.00  0.00           C  
ATOM   3209  O   LEU C 106     -21.324  10.763 -43.352  1.00  0.00           O  
ATOM   3210  CB  LEU C 106     -18.911  11.454 -41.055  1.00  0.00           C  
ATOM   3211  CG  LEU C 106     -18.543  11.641 -39.578  1.00  0.00           C  
ATOM   3212  CD1 LEU C 106     -17.212  10.958 -39.295  1.00  0.00           C  
ATOM   3213  CD2 LEU C 106     -18.475  13.126 -39.255  1.00  0.00           C  
ATOM   3214  N   SER C 107     -19.855  12.446 -43.881  1.00  0.00           N  
ATOM   3215  CA  SER C 107     -19.847  12.363 -45.370  1.00  0.00           C  
ATOM   3216  C   SER C 107     -18.466  12.746 -45.953  1.00  0.00           C  
ATOM   3217  O   SER C 107     -17.581  13.337 -45.272  1.00  0.00           O  
ATOM   3218  CB  SER C 107     -20.914  13.270 -45.951  1.00  0.00           C  
ATOM   3219  OG  SER C 107     -20.535  14.616 -45.856  1.00  0.00           O  
ATOM   3220  N   LEU C 108     -18.283  12.320 -47.213  1.00  0.00           N  
ATOM   3221  CA  LEU C 108     -17.135  12.405 -48.088  1.00  0.00           C  
ATOM   3222  C   LEU C 108     -17.593  12.882 -49.487  1.00  0.00           C  
ATOM   3223  O   LEU C 108     -18.346  12.174 -50.192  1.00  0.00           O  
ATOM   3224  CB  LEU C 108     -16.437  11.042 -48.182  1.00  0.00           C  
ATOM   3225  CG  LEU C 108     -15.352  10.923 -49.260  1.00  0.00           C  
ATOM   3226  CD1 LEU C 108     -14.204  11.867 -48.932  1.00  0.00           C  
ATOM   3227  CD2 LEU C 108     -14.870   9.482 -49.338  1.00  0.00           C  
ATOM   3228  N   TRP C 109     -16.950  13.977 -49.945  1.00  0.00           N  
ATOM   3229  CA  TRP C 109     -17.325  14.651 -51.209  1.00  0.00           C  
ATOM   3230  C   TRP C 109     -16.087  15.192 -51.917  1.00  0.00           C  
ATOM   3231  O   TRP C 109     -14.954  15.020 -51.471  1.00  0.00           O  
ATOM   3232  CB  TRP C 109     -18.304  15.796 -50.945  1.00  0.00           C  
ATOM   3233  CG  TRP C 109     -17.724  16.899 -50.112  1.00  0.00           C  
ATOM   3234  CD1 TRP C 109     -17.185  18.066 -50.564  1.00  0.00           C  
ATOM   3235  CD2 TRP C 109     -17.623  16.944 -48.668  1.00  0.00           C  
ATOM   3236  CE2 TRP C 109     -17.018  18.160 -48.339  1.00  0.00           C  
ATOM   3237  CE3 TRP C 109     -17.994  16.064 -47.644  1.00  0.00           C  
ATOM   3238  NE1 TRP C 109     -16.756  18.830 -49.508  1.00  0.00           N  
ATOM   3239  CZ2 TRP C 109     -16.768  18.523 -47.025  1.00  0.00           C  
ATOM   3240  CZ3 TRP C 109     -17.745  16.429 -46.326  1.00  0.00           C  
ATOM   3241  CH2 TRP C 109     -17.148  17.628 -46.026  1.00  0.00           C  
ATOM   3242  N   ALA C 110     -16.325  15.861 -53.064  1.00  0.00           N  
ATOM   3243  CA  ALA C 110     -15.257  16.264 -53.940  1.00  0.00           C  
ATOM   3244  C   ALA C 110     -15.611  17.345 -54.983  1.00  0.00           C  
ATOM   3245  O   ALA C 110     -16.780  17.705 -55.115  1.00  0.00           O  
ATOM   3246  CB  ALA C 110     -14.685  14.965 -54.671  1.00  0.00           C  
ATOM   3247  N   ARG C 111     -14.583  17.904 -55.665  1.00  0.00           N  
ATOM   3248  CA  ARG C 111     -14.649  18.846 -56.758  1.00  0.00           C  
ATOM   3249  C   ARG C 111     -14.029  18.134 -58.036  1.00  0.00           C  
ATOM   3250  O   ARG C 111     -13.240  17.175 -57.901  1.00  0.00           O  
ATOM   3251  CB  ARG C 111     -13.894  20.121 -56.412  1.00  0.00           C  
ATOM   3252  CG  ARG C 111     -14.373  20.826 -55.153  1.00  0.00           C  
ATOM   3253  CD  ARG C 111     -15.581  21.650 -55.411  1.00  0.00           C  
ATOM   3254  NE  ARG C 111     -16.000  22.385 -54.228  1.00  0.00           N  
ATOM   3255  CZ  ARG C 111     -17.080  23.187 -54.168  1.00  0.00           C  
ATOM   3256  NH1 ARG C 111     -17.839  23.348 -55.229  1.00  0.00           N1+
ATOM   3257  NH2 ARG C 111     -17.377  23.813 -53.042  1.00  0.00           N  
ATOM   3258  N   ARG C 112     -14.524  18.556 -59.157  1.00  0.00           N  
ATOM   3259  CA  ARG C 112     -14.156  18.108 -60.535  1.00  0.00           C  
ATOM   3260  C   ARG C 112     -12.825  18.710 -61.004  1.00  0.00           C  
ATOM   3261  O   ARG C 112     -12.858  19.921 -61.158  1.00  0.00           O  
ATOM   3262  CB  ARG C 112     -15.241  18.488 -61.533  1.00  0.00           C  
ATOM   3263  CG  ARG C 112     -15.072  17.889 -62.920  1.00  0.00           C  
ATOM   3264  CD  ARG C 112     -16.060  18.443 -63.881  1.00  0.00           C  
ATOM   3265  NE  ARG C 112     -16.019  17.752 -65.160  1.00  0.00           N  
ATOM   3266  CZ  ARG C 112     -16.893  16.801 -65.543  1.00  0.00           C  
ATOM   3267  NH1 ARG C 112     -17.867  16.440 -64.738  1.00  0.00           N1+
ATOM   3268  NH2 ARG C 112     -16.770  16.230 -66.729  1.00  0.00           N  
ATOM   3269  N   GLU C 113     -11.828  17.906 -61.245  1.00  0.00           N  
ATOM   3270  CA  GLU C 113     -10.458  18.428 -61.700  1.00  0.00           C  
ATOM   3271  C   GLU C 113     -10.276  18.209 -63.214  1.00  0.00           C  
ATOM   3272  O   GLU C 113      -9.294  18.622 -63.789  1.00  0.00           O  
ATOM   3273  CB  GLU C 113      -9.316  17.736 -60.952  1.00  0.00           C  
ATOM   3274  CG  GLU C 113      -9.324  17.960 -59.447  1.00  0.00           C  
ATOM   3275  CD  GLU C 113      -9.111  19.400 -59.069  1.00  0.00           C  
ATOM   3276  OE1 GLU C 113      -8.323  20.052 -59.710  1.00  0.00           O  
ATOM   3277  OE2 GLU C 113      -9.737  19.848 -58.137  1.00  0.00           O1-
ATOM   3278  N   ASN C 114     -11.252  17.677 -63.940  1.00  0.00           N  
ATOM   3279  CA  ASN C 114     -11.208  17.352 -65.428  1.00  0.00           C  
ATOM   3280  C   ASN C 114     -10.002  16.515 -65.884  1.00  0.00           C  
ATOM   3281  O   ASN C 114      -9.244  16.998 -66.685  1.00  0.00           O  
ATOM   3282  CB  ASN C 114     -11.249  18.629 -66.247  1.00  0.00           C  
ATOM   3283  CG  ASN C 114     -12.582  19.322 -66.171  1.00  0.00           C  
ATOM   3284  ND2 ASN C 114     -12.560  20.630 -66.137  1.00  0.00           N  
ATOM   3285  OD1 ASN C 114     -13.633  18.670 -66.142  1.00  0.00           O  
ATOM   3286  N   GLY C 115      -9.771  15.433 -65.135  1.00  0.00           N  
ATOM   3287  CA  GLY C 115      -8.668  14.542 -65.302  1.00  0.00           C  
ATOM   3288  C   GLY C 115      -8.635  13.570 -64.135  1.00  0.00           C  
ATOM   3289  O   GLY C 115      -8.435  12.394 -64.248  1.00  0.00           O  
ATOM   3290  N   SER C 116      -8.976  14.005 -62.854  1.00  0.00           N  
ATOM   3291  CA  SER C 116      -9.098  13.283 -61.604  1.00  0.00           C  
ATOM   3292  C   SER C 116     -10.136  14.009 -60.773  1.00  0.00           C  
ATOM   3293  O   SER C 116     -10.934  14.821 -61.264  1.00  0.00           O  
ATOM   3294  CB  SER C 116      -7.771  13.216 -60.874  1.00  0.00           C  
ATOM   3295  OG  SER C 116      -7.852  12.369 -59.760  1.00  0.00           O  
ATOM   3296  N   VAL C 117     -10.278  13.584 -59.508  1.00  0.00           N  
ATOM   3297  CA  VAL C 117     -11.273  14.147 -58.581  1.00  0.00           C  
ATOM   3298  C   VAL C 117     -10.642  14.463 -57.153  1.00  0.00           C  
ATOM   3299  O   VAL C 117     -10.039  13.585 -56.588  1.00  0.00           O  
ATOM   3300  CB  VAL C 117     -12.446  13.160 -58.430  1.00  0.00           C  
ATOM   3301  CG1 VAL C 117     -13.439  13.666 -57.395  1.00  0.00           C  
ATOM   3302  CG2 VAL C 117     -13.126  12.956 -59.775  1.00  0.00           C  
ATOM   3303  N   LYS C 118     -10.903  15.658 -56.637  1.00  0.00           N  
ATOM   3304  CA  LYS C 118     -10.328  16.221 -55.401  1.00  0.00           C  
ATOM   3305  C   LYS C 118     -11.257  15.977 -54.211  1.00  0.00           C  
ATOM   3306  O   LYS C 118     -12.288  16.673 -54.143  1.00  0.00           O  
ATOM   3307  CB  LYS C 118     -10.061  17.718 -55.559  1.00  0.00           C  
ATOM   3308  CG  LYS C 118      -9.336  18.355 -54.380  1.00  0.00           C  
ATOM   3309  CD  LYS C 118      -9.061  19.830 -54.633  1.00  0.00           C  
ATOM   3310  CE  LYS C 118      -8.236  20.441 -53.509  1.00  0.00           C  
ATOM   3311  NZ  LYS C 118      -7.972  21.888 -53.735  1.00  0.00           N1+
ATOM   3312  N   TRP C 119     -10.916  14.991 -53.376  1.00  0.00           N  
ATOM   3313  CA  TRP C 119     -11.826  14.595 -52.256  1.00  0.00           C  
ATOM   3314  C   TRP C 119     -11.630  15.260 -50.873  1.00  0.00           C  
ATOM   3315  O   TRP C 119     -10.490  15.634 -50.558  1.00  0.00           O  
ATOM   3316  CB  TRP C 119     -11.723  13.081 -52.058  1.00  0.00           C  
ATOM   3317  CG  TRP C 119     -12.321  12.288 -53.180  1.00  0.00           C  
ATOM   3318  CD1 TRP C 119     -11.673  11.819 -54.283  1.00  0.00           C  
ATOM   3319  CD2 TRP C 119     -13.700  11.864 -53.314  1.00  0.00           C  
ATOM   3320  CE2 TRP C 119     -13.793  11.153 -54.513  1.00  0.00           C  
ATOM   3321  CE3 TRP C 119     -14.844  12.029 -52.524  1.00  0.00           C  
ATOM   3322  NE1 TRP C 119     -12.548  11.137 -55.091  1.00  0.00           N  
ATOM   3323  CZ2 TRP C 119     -14.988  10.604 -54.949  1.00  0.00           C  
ATOM   3324  CZ3 TRP C 119     -16.043  11.477 -52.961  1.00  0.00           C  
ATOM   3325  CH2 TRP C 119     -16.112  10.782 -54.142  1.00  0.00           C  
ATOM   3326  N   PHE C 120     -12.720  15.483 -50.150  1.00  0.00           N  
ATOM   3327  CA  PHE C 120     -12.740  16.162 -48.798  1.00  0.00           C  
ATOM   3328  C   PHE C 120     -13.471  15.380 -47.676  1.00  0.00           C  
ATOM   3329  O   PHE C 120     -14.520  14.816 -47.908  1.00  0.00           O  
ATOM   3330  CB  PHE C 120     -13.390  17.541 -48.922  1.00  0.00           C  
ATOM   3331  CG  PHE C 120     -12.746  18.425 -49.952  1.00  0.00           C  
ATOM   3332  CD1 PHE C 120     -13.228  18.465 -51.252  1.00  0.00           C  
ATOM   3333  CD2 PHE C 120     -11.656  19.216 -49.624  1.00  0.00           C  
ATOM   3334  CE1 PHE C 120     -12.636  19.278 -52.200  1.00  0.00           C  
ATOM   3335  CE2 PHE C 120     -11.063  20.031 -50.569  1.00  0.00           C  
ATOM   3336  CZ  PHE C 120     -11.554  20.061 -51.859  1.00  0.00           C  
ATOM   3337  N   CYS C 121     -12.968  15.315 -46.485  1.00  0.00           N  
ATOM   3338  CA  CYS C 121     -13.441  14.422 -45.359  1.00  0.00           C  
ATOM   3339  C   CYS C 121     -14.022  15.227 -44.173  1.00  0.00           C  
ATOM   3340  O   CYS C 121     -13.265  15.940 -43.546  1.00  0.00           O  
ATOM   3341  CB  CYS C 121     -12.296  13.553 -44.839  1.00  0.00           C  
ATOM   3342  SG  CYS C 121     -11.611  12.420 -46.071  1.00  0.00           S  
ATOM   3343  N   GLY C 122     -15.354  15.221 -43.834  1.00  0.00           N  
ATOM   3344  CA  GLY C 122     -15.942  15.964 -42.762  1.00  0.00           C  
ATOM   3345  C   GLY C 122     -17.356  15.588 -42.365  1.00  0.00           C  
ATOM   3346  O   GLY C 122     -17.748  14.403 -42.285  1.00  0.00           O  
ATOM   3347  N   GLN C 123     -18.152  16.579 -42.081  1.00  0.00           N  
ATOM   3348  CA  GLN C 123     -19.507  16.405 -41.581  1.00  0.00           C  
ATOM   3349  C   GLN C 123     -20.473  16.076 -42.768  1.00  0.00           C  
ATOM   3350  O   GLN C 123     -20.113  16.286 -43.920  1.00  0.00           O  
ATOM   3351  CB  GLN C 123     -19.963  17.663 -40.837  1.00  0.00           C  
ATOM   3352  CG  GLN C 123     -19.226  17.917 -39.533  1.00  0.00           C  
ATOM   3353  CD  GLN C 123     -19.784  19.107 -38.775  1.00  0.00           C  
ATOM   3354  NE2 GLN C 123     -20.185  18.879 -37.530  1.00  0.00           N  
ATOM   3355  OE1 GLN C 123     -19.853  20.220 -39.304  1.00  0.00           O  
ATOM   3356  N   PRO C 124     -21.675  15.678 -42.462  1.00  0.00           N  
ATOM   3357  CA  PRO C 124     -22.698  15.335 -43.493  1.00  0.00           C  
ATOM   3358  C   PRO C 124     -23.060  16.463 -44.436  1.00  0.00           C  
ATOM   3359  O   PRO C 124     -23.611  17.452 -43.974  1.00  0.00           O  
ATOM   3360  CB  PRO C 124     -23.911  14.942 -42.644  1.00  0.00           C  
ATOM   3361  CG  PRO C 124     -23.318  14.422 -41.379  1.00  0.00           C  
ATOM   3362  CD  PRO C 124     -22.153  15.336 -41.108  1.00  0.00           C  
ATOM   3363  N   VAL C 125     -22.832  16.298 -45.750  1.00  0.00           N  
ATOM   3364  CA  VAL C 125     -23.381  17.132 -46.772  1.00  0.00           C  
ATOM   3365  C   VAL C 125     -24.119  16.369 -47.867  1.00  0.00           C  
ATOM   3366  O   VAL C 125     -23.990  15.131 -48.002  1.00  0.00           O  
ATOM   3367  CB  VAL C 125     -22.246  17.958 -47.408  1.00  0.00           C  
ATOM   3368  CG1 VAL C 125     -21.543  18.798 -46.353  1.00  0.00           C  
ATOM   3369  CG2 VAL C 125     -21.261  17.032 -48.106  1.00  0.00           C  
ATOM   3370  N   THR C 126     -24.878  17.061 -48.679  1.00  0.00           N  
ATOM   3371  CA  THR C 126     -25.629  16.651 -49.821  1.00  0.00           C  
ATOM   3372  C   THR C 126     -25.033  17.332 -51.172  1.00  0.00           C  
ATOM   3373  O   THR C 126     -24.490  18.400 -51.070  1.00  0.00           O  
ATOM   3374  CB  THR C 126     -27.112  17.008 -49.611  1.00  0.00           C  
ATOM   3375  CG2 THR C 126     -27.664  16.292 -48.387  1.00  0.00           C  
ATOM   3376  OG1 THR C 126     -27.246  18.424 -49.433  1.00  0.00           O  
ATOM   3377  N   ARG C 127     -25.198  16.623 -52.350  1.00  0.00           N  
ATOM   3378  CA  ARG C 127     -24.669  17.149 -53.640  1.00  0.00           C  
ATOM   3379  C   ARG C 127     -25.632  18.046 -54.420  1.00  0.00           C  
ATOM   3380  O   ARG C 127     -26.566  17.572 -55.002  1.00  0.00           O  
ATOM   3381  CB  ARG C 127     -24.269  15.993 -54.545  1.00  0.00           C  
ATOM   3382  CG  ARG C 127     -23.581  16.401 -55.838  1.00  0.00           C  
ATOM   3383  CD  ARG C 127     -22.189  16.861 -55.598  1.00  0.00           C  
ATOM   3384  NE  ARG C 127     -21.312  15.762 -55.226  1.00  0.00           N  
ATOM   3385  CZ  ARG C 127     -19.994  15.887 -54.977  1.00  0.00           C  
ATOM   3386  NH1 ARG C 127     -19.417  17.065 -55.063  1.00  0.00           N1+
ATOM   3387  NH2 ARG C 127     -19.281  14.825 -54.645  1.00  0.00           N  
ATOM   3388  N   THR C 128     -25.383  19.311 -54.509  1.00  0.00           N  
ATOM   3389  CA  THR C 128     -26.270  20.227 -55.240  1.00  0.00           C  
ATOM   3390  C   THR C 128     -26.157  20.219 -56.715  1.00  0.00           C  
ATOM   3391  O   THR C 128     -27.128  20.095 -57.458  1.00  0.00           O  
ATOM   3392  CB  THR C 128     -26.049  21.678 -54.772  1.00  0.00           C  
ATOM   3393  CG2 THR C 128     -26.941  22.632 -55.553  1.00  0.00           C  
ATOM   3394  OG1 THR C 128     -26.351  21.783 -53.374  1.00  0.00           O  
ATOM   3395  N   ASP C 129     -24.883  20.266 -57.166  1.00  0.00           N  
ATOM   3396  CA  ASP C 129     -24.567  20.186 -58.610  1.00  0.00           C  
ATOM   3397  C   ASP C 129     -23.213  19.426 -58.869  1.00  0.00           C  
ATOM   3398  O   ASP C 129     -22.583  18.817 -57.983  1.00  0.00           O  
ATOM   3399  CB  ASP C 129     -24.501  21.593 -59.209  1.00  0.00           C  
ATOM   3400  CG  ASP C 129     -23.361  22.427 -58.639  1.00  0.00           C  
ATOM   3401  OD1 ASP C 129     -22.336  21.865 -58.333  1.00  0.00           O  
ATOM   3402  OD2 ASP C 129     -23.526  23.617 -58.515  1.00  0.00           O1-
ATOM   3403  N   ASP C 130     -22.707  19.504 -60.129  1.00  0.00           N  
ATOM   3404  CA  ASP C 130     -21.489  18.831 -60.584  1.00  0.00           C  
ATOM   3405  C   ASP C 130     -20.209  19.091 -59.707  1.00  0.00           C  
ATOM   3406  O   ASP C 130     -19.319  18.249 -59.769  1.00  0.00           O  
ATOM   3407  CB  ASP C 130     -21.209  19.251 -62.029  1.00  0.00           C  
ATOM   3408  CG  ASP C 130     -22.198  18.655 -63.021  1.00  0.00           C  
ATOM   3409  OD1 ASP C 130     -22.961  17.802 -62.631  1.00  0.00           O  
ATOM   3410  OD2 ASP C 130     -22.182  19.058 -64.160  1.00  0.00           O1-
ATOM   3411  N   ASP C 131     -20.132  20.164 -58.900  1.00  0.00           N  
ATOM   3412  CA  ASP C 131     -19.020  20.467 -57.996  1.00  0.00           C  
ATOM   3413  C   ASP C 131     -19.426  20.812 -56.528  1.00  0.00           C  
ATOM   3414  O   ASP C 131     -18.755  20.403 -55.569  1.00  0.00           O  
ATOM   3415  CB  ASP C 131     -18.211  21.628 -58.579  1.00  0.00           C  
ATOM   3416  CG  ASP C 131     -17.445  21.243 -59.837  1.00  0.00           C  
ATOM   3417  OD1 ASP C 131     -16.604  20.379 -59.756  1.00  0.00           O  
ATOM   3418  OD2 ASP C 131     -17.707  21.817 -60.867  1.00  0.00           O1-
ATOM   3419  N   THR C 132     -20.563  21.462 -56.331  1.00  0.00           N  
ATOM   3420  CA  THR C 132     -21.033  21.998 -55.006  1.00  0.00           C  
ATOM   3421  C   THR C 132     -21.954  21.160 -54.150  1.00  0.00           C  
ATOM   3422  O   THR C 132     -22.993  20.731 -54.633  1.00  0.00           O  
ATOM   3423  CB  THR C 132     -21.743  23.349 -55.213  1.00  0.00           C  
ATOM   3424  CG2 THR C 132     -22.306  23.863 -53.897  1.00  0.00           C  
ATOM   3425  OG1 THR C 132     -20.812  24.306 -55.736  1.00  0.00           O  
ATOM   3426  N   VAL C 133     -21.772  21.105 -52.936  1.00  0.00           N  
ATOM   3427  CA  VAL C 133     -22.529  20.486 -51.845  1.00  0.00           C  
ATOM   3428  C   VAL C 133     -23.199  21.404 -50.708  1.00  0.00           C  
ATOM   3429  O   VAL C 133     -22.737  22.521 -50.571  1.00  0.00           O  
ATOM   3430  CB  VAL C 133     -21.576  19.486 -51.165  1.00  0.00           C  
ATOM   3431  CG1 VAL C 133     -21.131  18.418 -52.153  1.00  0.00           C  
ATOM   3432  CG2 VAL C 133     -20.376  20.223 -50.589  1.00  0.00           C  
ATOM   3433  N   ALA C 134     -24.085  20.939 -49.826  1.00  0.00           N  
ATOM   3434  CA  ALA C 134     -24.740  21.737 -48.804  1.00  0.00           C  
ATOM   3435  C   ALA C 134     -24.785  20.979 -47.440  1.00  0.00           C  
ATOM   3436  O   ALA C 134     -24.803  19.690 -47.400  1.00  0.00           O  
ATOM   3437  CB  ALA C 134     -26.117  22.194 -49.258  1.00  0.00           C  
ATOM   3438  N   ASP C 135     -24.768  21.823 -46.380  1.00  0.00           N  
ATOM   3439  CA  ASP C 135     -24.715  21.259 -44.999  1.00  0.00           C  
ATOM   3440  C   ASP C 135     -25.968  20.452 -44.465  1.00  0.00           C  
ATOM   3441  O   ASP C 135     -26.891  21.113 -44.008  1.00  0.00           O  
ATOM   3442  CB  ASP C 135     -24.435  22.410 -44.028  1.00  0.00           C  
ATOM   3443  CG  ASP C 135     -24.261  21.942 -42.590  1.00  0.00           C  
ATOM   3444  OD1 ASP C 135     -24.576  20.810 -42.311  1.00  0.00           O  
ATOM   3445  OD2 ASP C 135     -23.814  22.722 -41.783  1.00  0.00           O1-
ATOM   3446  N   ALA C 136     -25.911  19.110 -44.388  1.00  0.00           N  
ATOM   3447  CA  ALA C 136     -27.050  18.250 -43.985  1.00  0.00           C  
ATOM   3448  C   ALA C 136     -27.196  18.095 -42.457  1.00  0.00           C  
ATOM   3449  O   ALA C 136     -27.010  17.040 -41.870  1.00  0.00           O  
ATOM   3450  CB  ALA C 136     -26.867  16.865 -44.555  1.00  0.00           C  
ATOM   3451  N   LYS C 137     -27.386  19.282 -41.765  1.00  0.00           N  
ATOM   3452  CA  LYS C 137     -27.584  19.336 -40.310  1.00  0.00           C  
ATOM   3453  C   LYS C 137     -28.982  19.002 -39.870  1.00  0.00           C  
ATOM   3454  O   LYS C 137     -29.943  19.641 -40.236  1.00  0.00           O  
ATOM   3455  CB  LYS C 137     -27.215  20.722 -39.779  1.00  0.00           C  
ATOM   3456  CG  LYS C 137     -27.283  20.854 -38.263  1.00  0.00           C  
ATOM   3457  CD  LYS C 137     -26.705  22.181 -37.797  1.00  0.00           C  
ATOM   3458  CE  LYS C 137     -26.719  22.290 -36.279  1.00  0.00           C  
ATOM   3459  NZ  LYS C 137     -25.795  21.313 -35.642  1.00  0.00           N1+
ATOM   3460  N   ASP C 138     -29.074  17.983 -38.959  1.00  0.00           N  
ATOM   3461  CA  ASP C 138     -30.445  17.538 -38.512  1.00  0.00           C  
ATOM   3462  C   ASP C 138     -30.554  16.926 -37.082  1.00  0.00           C  
ATOM   3463  O   ASP C 138     -31.649  16.453 -36.679  1.00  0.00           O  
ATOM   3464  CB  ASP C 138     -30.990  16.511 -39.508  1.00  0.00           C  
ATOM   3465  CG  ASP C 138     -30.116  15.269 -39.618  1.00  0.00           C  
ATOM   3466  OD1 ASP C 138     -29.302  15.061 -38.750  1.00  0.00           O  
ATOM   3467  OD2 ASP C 138     -30.271  14.541 -40.569  1.00  0.00           O1-
ATOM   3468  N   GLY C 139     -29.432  16.880 -36.416  1.00  0.00           N  
ATOM   3469  CA  GLY C 139     -29.354  16.294 -35.052  1.00  0.00           C  
ATOM   3470  C   GLY C 139     -28.646  14.973 -35.003  1.00  0.00           C  
ATOM   3471  O   GLY C 139     -28.416  14.483 -33.897  1.00  0.00           O  
ATOM   3472  N   LYS C 140     -28.380  14.255 -36.156  1.00  0.00           N  
ATOM   3473  CA  LYS C 140     -27.647  12.963 -36.178  1.00  0.00           C  
ATOM   3474  C   LYS C 140     -26.232  13.080 -36.696  1.00  0.00           C  
ATOM   3475  O   LYS C 140     -25.592  12.088 -36.855  1.00  0.00           O  
ATOM   3476  CB  LYS C 140     -28.400  11.935 -37.024  1.00  0.00           C  
ATOM   3477  CG  LYS C 140     -29.755  11.527 -36.460  1.00  0.00           C  
ATOM   3478  CD  LYS C 140     -30.423  10.476 -37.333  1.00  0.00           C  
ATOM   3479  CE  LYS C 140     -31.770  10.056 -36.763  1.00  0.00           C  
ATOM   3480  NZ  LYS C 140     -32.450   9.050 -37.623  1.00  0.00           N1+
ATOM   3481  N   GLU C 141     -25.825  14.304 -36.999  1.00  0.00           N  
ATOM   3482  CA  GLU C 141     -24.522  14.543 -37.514  1.00  0.00           C  
ATOM   3483  C   GLU C 141     -23.532  14.447 -36.363  1.00  0.00           C  
ATOM   3484  O   GLU C 141     -23.924  14.796 -35.224  1.00  0.00           O  
ATOM   3485  CB  GLU C 141     -24.448  15.914 -38.190  1.00  0.00           C  
ATOM   3486  CG  GLU C 141     -24.518  17.093 -37.230  1.00  0.00           C  
ATOM   3487  CD  GLU C 141     -25.928  17.505 -36.911  1.00  0.00           C  
ATOM   3488  OE1 GLU C 141     -26.836  16.885 -37.412  1.00  0.00           O  
ATOM   3489  OE2 GLU C 141     -26.098  18.441 -36.165  1.00  0.00           O1-
ATOM   3490  N   ILE C 142     -22.294  14.031 -36.567  1.00  0.00           N  
ATOM   3491  CA  ILE C 142     -21.235  14.051 -35.496  1.00  0.00           C  
ATOM   3492  C   ILE C 142     -20.613  15.519 -35.471  1.00  0.00           C  
ATOM   3493  O   ILE C 142     -20.238  16.048 -36.479  1.00  0.00           O  
ATOM   3494  CB  ILE C 142     -20.141  13.000 -35.757  1.00  0.00           C  
ATOM   3495  CG1 ILE C 142     -20.719  11.587 -35.641  1.00  0.00           C  
ATOM   3496  CG2 ILE C 142     -18.983  13.186 -34.789  1.00  0.00           C  
ATOM   3497  CD1 ILE C 142     -19.751  10.496 -36.040  1.00  0.00           C  
ATOM   3498  N   ASP C 143     -20.592  16.098 -34.284  1.00  0.00           N  
ATOM   3499  CA  ASP C 143     -19.949  17.411 -33.992  1.00  0.00           C  
ATOM   3500  C   ASP C 143     -18.442  17.230 -34.064  1.00  0.00           C  
ATOM   3501  O   ASP C 143     -17.940  16.216 -33.599  1.00  0.00           O  
ATOM   3502  CB  ASP C 143     -20.344  17.946 -32.614  1.00  0.00           C  
ATOM   3503  CG  ASP C 143     -19.812  19.348 -32.347  1.00  0.00           C  
ATOM   3504  OD1 ASP C 143     -18.645  19.476 -32.063  1.00  0.00           O  
ATOM   3505  OD2 ASP C 143     -20.579  20.278 -32.431  1.00  0.00           O1-
ATOM   3506  N   THR C 144     -17.670  18.175 -34.632  1.00  0.00           N  
ATOM   3507  CA  THR C 144     -16.206  18.086 -34.743  1.00  0.00           C  
ATOM   3508  C   THR C 144     -15.361  17.806 -33.441  1.00  0.00           C  
ATOM   3509  O   THR C 144     -14.193  17.436 -33.483  1.00  0.00           O  
ATOM   3510  CB  THR C 144     -15.692  19.388 -35.384  1.00  0.00           C  
ATOM   3511  CG2 THR C 144     -16.262  19.554 -36.784  1.00  0.00           C  
ATOM   3512  OG1 THR C 144     -16.081  20.507 -34.577  1.00  0.00           O  
ATOM   3513  N   LYS C 145     -16.073  18.002 -32.245  1.00  0.00           N  
ATOM   3514  CA  LYS C 145     -15.422  17.665 -30.972  1.00  0.00           C  
ATOM   3515  C   LYS C 145     -14.968  16.177 -30.846  1.00  0.00           C  
ATOM   3516  O   LYS C 145     -14.131  15.985 -29.993  1.00  0.00           O  
ATOM   3517  CB  LYS C 145     -16.366  18.013 -29.820  1.00  0.00           C  
ATOM   3518  CG  LYS C 145     -17.560  17.077 -29.680  1.00  0.00           C  
ATOM   3519  CD  LYS C 145     -18.517  17.559 -28.601  1.00  0.00           C  
ATOM   3520  CE  LYS C 145     -17.864  17.528 -27.227  1.00  0.00           C  
ATOM   3521  NZ  LYS C 145     -18.831  17.858 -26.144  1.00  0.00           N1+
ATOM   3522  N   HIS C 146     -15.464  15.280 -31.662  1.00  0.00           N  
ATOM   3523  CA  HIS C 146     -14.902  13.829 -31.641  1.00  0.00           C  
ATOM   3524  C   HIS C 146     -14.275  13.445 -33.030  1.00  0.00           C  
ATOM   3525  O   HIS C 146     -14.047  12.254 -33.256  1.00  0.00           O  
ATOM   3526  CB  HIS C 146     -15.991  12.811 -31.289  1.00  0.00           C  
ATOM   3527  CG  HIS C 146     -16.478  12.915 -29.877  1.00  0.00           C  
ATOM   3528  CD2 HIS C 146     -17.641  13.384 -29.366  1.00  0.00           C  
ATOM   3529  ND1 HIS C 146     -15.724  12.501 -28.798  1.00  0.00           N  
ATOM   3530  CE1 HIS C 146     -16.404  12.713 -27.684  1.00  0.00           C  
ATOM   3531  NE2 HIS C 146     -17.569  13.247 -28.002  1.00  0.00           N  
ATOM   3532  N   LEU C 147     -13.893  14.456 -33.915  1.00  0.00           N  
ATOM   3533  CA  LEU C 147     -13.326  14.157 -35.219  1.00  0.00           C  
ATOM   3534  C   LEU C 147     -11.811  14.557 -35.259  1.00  0.00           C  
ATOM   3535  O   LEU C 147     -11.387  15.608 -34.752  1.00  0.00           O  
ATOM   3536  CB  LEU C 147     -14.111  14.899 -36.308  1.00  0.00           C  
ATOM   3537  CG  LEU C 147     -15.611  14.586 -36.377  1.00  0.00           C  
ATOM   3538  CD1 LEU C 147     -16.252  15.410 -37.486  1.00  0.00           C  
ATOM   3539  CD2 LEU C 147     -15.809  13.097 -36.619  1.00  0.00           C  
ATOM   3540  N   PRO C 148     -10.933  13.760 -35.906  1.00  0.00           N  
ATOM   3541  CA  PRO C 148      -9.530  13.991 -36.209  1.00  0.00           C  
ATOM   3542  C   PRO C 148      -9.386  15.357 -36.963  1.00  0.00           C  
ATOM   3543  O   PRO C 148     -10.248  15.822 -37.695  1.00  0.00           O  
ATOM   3544  CB  PRO C 148      -9.168  12.792 -37.092  1.00  0.00           C  
ATOM   3545  CG  PRO C 148     -10.126  11.729 -36.675  1.00  0.00           C  
ATOM   3546  CD  PRO C 148     -11.411  12.466 -36.408  1.00  0.00           C  
ATOM   3547  N   SER C 149      -8.225  15.974 -36.820  1.00  0.00           N  
ATOM   3548  CA  SER C 149      -7.860  17.326 -37.340  1.00  0.00           C  
ATOM   3549  C   SER C 149      -7.973  17.369 -38.891  1.00  0.00           C  
ATOM   3550  O   SER C 149      -8.176  18.452 -39.502  1.00  0.00           O  
ATOM   3551  CB  SER C 149      -6.451  17.691 -36.915  1.00  0.00           C  
ATOM   3552  OG  SER C 149      -5.508  16.859 -37.533  1.00  0.00           O  
ATOM   3553  N   THR C 150      -7.857  16.152 -39.510  1.00  0.00           N  
ATOM   3554  CA  THR C 150      -7.920  15.929 -40.967  1.00  0.00           C  
ATOM   3555  C   THR C 150      -9.327  15.481 -41.442  1.00  0.00           C  
ATOM   3556  O   THR C 150      -9.462  15.247 -42.619  1.00  0.00           O  
ATOM   3557  CB  THR C 150      -6.877  14.882 -41.399  1.00  0.00           C  
ATOM   3558  CG2 THR C 150      -5.475  15.339 -41.024  1.00  0.00           C  
ATOM   3559  OG1 THR C 150      -7.156  13.632 -40.755  1.00  0.00           O  
ATOM   3560  N   CYS C 151     -10.233  15.417 -40.512  1.00  0.00           N  
ATOM   3561  CA  CYS C 151     -11.617  14.952 -40.805  1.00  0.00           C  
ATOM   3562  C   CYS C 151     -12.691  15.885 -40.332  1.00  0.00           C  
ATOM   3563  O   CYS C 151     -13.759  15.542 -39.792  1.00  0.00           O  
ATOM   3564  CB  CYS C 151     -11.874  13.588 -40.165  1.00  0.00           C  
ATOM   3565  SG  CYS C 151     -10.782  12.275 -40.761  1.00  0.00           S  
ATOM   3566  N   ARG C 152     -12.431  17.143 -40.413  1.00  0.00           N  
ATOM   3567  CA  ARG C 152     -13.290  18.238 -40.027  1.00  0.00           C  
ATOM   3568  C   ARG C 152     -13.766  19.232 -41.073  1.00  0.00           C  
ATOM   3569  O   ARG C 152     -13.993  20.408 -40.777  1.00  0.00           O  
ATOM   3570  CB  ARG C 152     -12.578  19.030 -38.940  1.00  0.00           C  
ATOM   3571  CG  ARG C 152     -12.337  18.266 -37.647  1.00  0.00           C  
ATOM   3572  CD  ARG C 152     -11.441  19.013 -36.727  1.00  0.00           C  
ATOM   3573  NE  ARG C 152     -11.044  18.207 -35.584  1.00  0.00           N  
ATOM   3574  CZ  ARG C 152     -10.119  18.572 -34.675  1.00  0.00           C  
ATOM   3575  NH1 ARG C 152      -9.505  19.729 -34.790  1.00  0.00           N1+
ATOM   3576  NH2 ARG C 152      -9.828  17.767 -33.669  1.00  0.00           N  
ATOM   3577  N   ASP C 153     -13.817  18.815 -42.327  1.00  0.00           N  
ATOM   3578  CA  ASP C 153     -14.233  19.593 -43.580  1.00  0.00           C  
ATOM   3579  C   ASP C 153     -15.742  19.850 -43.579  1.00  0.00           C  
ATOM   3580  O   ASP C 153     -16.557  19.245 -42.882  1.00  0.00           O  
ATOM   3581  CB  ASP C 153     -13.861  18.841 -44.861  1.00  0.00           C  
ATOM   3582  CG  ASP C 153     -12.357  18.769 -45.089  1.00  0.00           C  
ATOM   3583  OD1 ASP C 153     -11.656  19.606 -44.572  1.00  0.00           O  
ATOM   3584  OD2 ASP C 153     -11.924  17.876 -45.779  1.00  0.00           O1-
ATOM   3585  N   ASN C 154     -16.164  20.844 -44.408  1.00  0.00           N  
ATOM   3586  CA  ASN C 154     -17.614  21.190 -44.537  1.00  0.00           C  
ATOM   3587  C   ASN C 154     -18.007  21.656 -45.990  1.00  0.00           C  
ATOM   3588  O   ASN C 154     -17.110  21.802 -46.849  1.00  0.00           O  
ATOM   3589  CB  ASN C 154     -17.982  22.258 -43.523  1.00  0.00           C  
ATOM   3590  CG  ASN C 154     -17.258  23.554 -43.760  1.00  0.00           C  
ATOM   3591  ND2 ASN C 154     -16.639  24.074 -42.731  1.00  0.00           N  
ATOM   3592  OD1 ASN C 154     -17.259  24.085 -44.876  1.00  0.00           O  
ATOM   3593  N   PHE C 155     -19.276  21.975 -46.284  1.00  0.00           N  
ATOM   3594  CA  PHE C 155     -19.808  22.368 -47.556  1.00  0.00           C  
ATOM   3595  C   PHE C 155     -19.082  23.498 -48.325  1.00  0.00           C  
ATOM   3596  O   PHE C 155     -19.357  23.600 -49.543  1.00  0.00           O  
ATOM   3597  CB  PHE C 155     -21.268  22.774 -47.342  1.00  0.00           C  
ATOM   3598  CG  PHE C 155     -21.435  24.065 -46.593  1.00  0.00           C  
ATOM   3599  CD1 PHE C 155     -21.687  25.249 -47.271  1.00  0.00           C  
ATOM   3600  CD2 PHE C 155     -21.340  24.099 -45.210  1.00  0.00           C  
ATOM   3601  CE1 PHE C 155     -21.841  26.438 -46.582  1.00  0.00           C  
ATOM   3602  CE2 PHE C 155     -21.494  25.285 -44.520  1.00  0.00           C  
ATOM   3603  CZ  PHE C 155     -21.744  26.456 -45.207  1.00  0.00           C  
ATOM   3604  N   ASP C 156     -18.246  24.322 -47.671  1.00  0.00           N  
ATOM   3605  CA  ASP C 156     -17.450  25.370 -48.360  1.00  0.00           C  
ATOM   3606  C   ASP C 156     -16.143  24.981 -48.980  1.00  0.00           C  
ATOM   3607  O   ASP C 156     -15.594  25.747 -49.740  1.00  0.00           O  
ATOM   3608  CB  ASP C 156     -17.158  26.510 -47.382  1.00  0.00           C  
ATOM   3609  CG  ASP C 156     -18.389  27.351 -47.068  1.00  0.00           C  
ATOM   3610  OD1 ASP C 156     -19.202  27.528 -47.943  1.00  0.00           O  
ATOM   3611  OD2 ASP C 156     -18.503  27.807 -45.955  1.00  0.00           O1-
ATOM   3612  N   ALA C 157     -15.709  23.701 -48.772  1.00  0.00           N  
ATOM   3613  CA  ALA C 157     -14.479  23.124 -49.278  1.00  0.00           C  
ATOM   3614  C   ALA C 157     -14.232  23.034 -50.733  1.00  0.00           C  
ATOM   3615  O   ALA C 157     -15.115  22.737 -51.521  1.00  0.00           O  
ATOM   3616  CB  ALA C 157     -14.321  21.751 -48.579  1.00  0.00           C  
ATOM   3617  N   LYS C 158     -13.000  23.374 -51.163  1.00  0.00           N  
ATOM   3618  CA  LYS C 158     -12.557  23.364 -52.581  1.00  0.00           C  
ATOM   3619  C   LYS C 158     -10.993  23.437 -52.744  1.00  0.00           C  
ATOM   3620  O   LYS C 158     -10.282  23.808 -51.819  1.00  0.00           O  
ATOM   3621  CB  LYS C 158     -13.213  24.524 -53.331  1.00  0.00           C  
ATOM   3622  CG  LYS C 158     -12.910  24.561 -54.823  1.00  0.00           C  
ATOM   3623  CD  LYS C 158     -13.672  25.681 -55.514  1.00  0.00           C  
ATOM   3624  CE  LYS C 158     -13.361  25.727 -57.003  1.00  0.00           C  
ATOM   3625  NZ  LYS C 158     -14.079  26.835 -57.688  1.00  0.00           N1+
ATOM   3626  OXT LYS C 158     -10.483  23.126 -53.784  1.00  0.00           O1-
TER    3627      LYS C 158 
ATOM   3628  N   PHE D   1      -3.915  -8.854  24.253  1.00  0.00           N  
ATOM   3629  CA  PHE D   1      -3.089  -7.932  25.091  1.00  0.00           C  
ATOM   3630  C   PHE D   1      -3.039  -6.478  24.621  1.00  0.00           C  
ATOM   3631  O   PHE D   1      -4.034  -5.749  24.523  1.00  0.00           O  
ATOM   3632  CB  PHE D   1      -1.653  -8.454  25.170  1.00  0.00           C  
ATOM   3633  CG  PHE D   1      -1.501  -9.683  26.020  1.00  0.00           C  
ATOM   3634  CD1 PHE D   1      -1.300 -10.926  25.438  1.00  0.00           C  
ATOM   3635  CD2 PHE D   1      -1.559  -9.600  27.403  1.00  0.00           C  
ATOM   3636  CE1 PHE D   1      -1.160 -12.058  26.219  1.00  0.00           C  
ATOM   3637  CE2 PHE D   1      -1.418 -10.729  28.186  1.00  0.00           C  
ATOM   3638  CZ  PHE D   1      -1.219 -11.959  27.593  1.00  0.00           C  
ATOM   3639  N   THR D   2      -1.865  -6.011  24.127  1.00  0.00           N  
ATOM   3640  CA  THR D   2      -1.690  -4.615  23.661  1.00  0.00           C  
ATOM   3641  C   THR D   2      -1.542  -4.481  22.133  1.00  0.00           C  
ATOM   3642  O   THR D   2      -2.535  -4.212  21.484  1.00  0.00           O  
ATOM   3643  CB  THR D   2      -0.465  -3.972  24.337  1.00  0.00           C  
ATOM   3644  CG2 THR D   2      -0.656  -3.916  25.845  1.00  0.00           C  
ATOM   3645  OG1 THR D   2       0.708  -4.738  24.035  1.00  0.00           O  
ATOM   3646  N   LEU D   3      -0.312  -4.701  21.601  1.00  0.00           N  
ATOM   3647  CA  LEU D   3      -0.143  -4.692  20.116  1.00  0.00           C  
ATOM   3648  C   LEU D   3      -0.881  -5.787  19.410  1.00  0.00           C  
ATOM   3649  O   LEU D   3      -0.480  -6.945  19.568  1.00  0.00           O  
ATOM   3650  CB  LEU D   3       1.342  -4.806  19.747  1.00  0.00           C  
ATOM   3651  CG  LEU D   3       1.658  -4.784  18.246  1.00  0.00           C  
ATOM   3652  CD1 LEU D   3       1.288  -3.425  17.668  1.00  0.00           C  
ATOM   3653  CD2 LEU D   3       3.134  -5.086  18.034  1.00  0.00           C  
ATOM   3654  N   ILE D   4      -1.799  -5.331  18.565  1.00  0.00           N  
ATOM   3655  CA  ILE D   4      -2.704  -6.068  17.726  1.00  0.00           C  
ATOM   3656  C   ILE D   4      -2.826  -5.502  16.317  1.00  0.00           C  
ATOM   3657  O   ILE D   4      -2.847  -6.399  15.426  1.00  0.00           O  
ATOM   3658  CB  ILE D   4      -4.099  -6.116  18.376  1.00  0.00           C  
ATOM   3659  CG1 ILE D   4      -4.661  -4.702  18.540  1.00  0.00           C  
ATOM   3660  CG2 ILE D   4      -4.036  -6.827  19.719  1.00  0.00           C  
ATOM   3661  CD1 ILE D   4      -6.109  -4.666  18.970  1.00  0.00           C  
ATOM   3662  N   GLU D   5      -2.656  -4.277  16.031  1.00  0.00           N  
ATOM   3663  CA  GLU D   5      -2.686  -3.708  14.676  1.00  0.00           C  
ATOM   3664  C   GLU D   5      -1.604  -4.290  13.756  1.00  0.00           C  
ATOM   3665  O   GLU D   5      -1.954  -4.394  12.549  1.00  0.00           O  
ATOM   3666  CB  GLU D   5      -2.528  -2.187  14.745  1.00  0.00           C  
ATOM   3667  CG  GLU D   5      -1.313  -1.717  15.532  1.00  0.00           C  
ATOM   3668  CD  GLU D   5      -1.582  -1.594  17.006  1.00  0.00           C  
ATOM   3669  OE1 GLU D   5      -2.206  -2.472  17.552  1.00  0.00           O  
ATOM   3670  OE2 GLU D   5      -1.163  -0.620  17.587  1.00  0.00           O1-
ATOM   3671  N   LEU D   6      -0.534  -4.800  14.288  1.00  0.00           N  
ATOM   3672  CA  LEU D   6       0.472  -5.567  13.565  1.00  0.00           C  
ATOM   3673  C   LEU D   6      -0.050  -6.816  12.834  1.00  0.00           C  
ATOM   3674  O   LEU D   6       0.218  -6.978  11.612  1.00  0.00           O  
ATOM   3675  CB  LEU D   6       1.572  -5.988  14.548  1.00  0.00           C  
ATOM   3676  CG  LEU D   6       2.663  -6.901  13.974  1.00  0.00           C  
ATOM   3677  CD1 LEU D   6       3.425  -6.158  12.884  1.00  0.00           C  
ATOM   3678  CD2 LEU D   6       3.597  -7.340  15.091  1.00  0.00           C  
ATOM   3679  N   MET D   7      -0.657  -7.756  13.539  1.00  0.00           N  
ATOM   3680  CA  MET D   7      -1.124  -8.979  12.988  1.00  0.00           C  
ATOM   3681  C   MET D   7      -2.316  -8.663  12.140  1.00  0.00           C  
ATOM   3682  O   MET D   7      -2.589  -9.317  11.124  1.00  0.00           O  
ATOM   3683  CB  MET D   7      -1.468  -9.982  14.088  1.00  0.00           C  
ATOM   3684  CG  MET D   7      -0.270 -10.484  14.880  1.00  0.00           C  
ATOM   3685  SD  MET D   7       1.014 -11.188  13.827  1.00  0.00           S  
ATOM   3686  CE  MET D   7       0.159 -12.612  13.158  1.00  0.00           C  
ATOM   3687  N   ILE D   8      -3.121  -7.622  12.448  1.00  0.00           N  
ATOM   3688  CA  ILE D   8      -4.264  -7.170  11.637  1.00  0.00           C  
ATOM   3689  C   ILE D   8      -3.949  -6.701  10.262  1.00  0.00           C  
ATOM   3690  O   ILE D   8      -4.423  -7.183   9.291  1.00  0.00           O  
ATOM   3691  CB  ILE D   8      -5.008  -6.028  12.352  1.00  0.00           C  
ATOM   3692  CG1 ILE D   8      -5.705  -6.551  13.610  1.00  0.00           C  
ATOM   3693  CG2 ILE D   8      -6.013  -5.378  11.414  1.00  0.00           C  
ATOM   3694  CD1 ILE D   8      -6.231  -5.460  14.515  1.00  0.00           C  
ATOM   3695  N   VAL D   9      -2.895  -5.849  10.106  1.00  0.00           N  
ATOM   3696  CA  VAL D   9      -2.318  -5.364   8.765  1.00  0.00           C  
ATOM   3697  C   VAL D   9      -1.680  -6.579   8.116  1.00  0.00           C  
ATOM   3698  O   VAL D   9      -1.973  -6.786   6.941  1.00  0.00           O  
ATOM   3699  CB  VAL D   9      -1.259  -4.259   8.936  1.00  0.00           C  
ATOM   3700  CG1 VAL D   9      -0.585  -3.957   7.606  1.00  0.00           C  
ATOM   3701  CG2 VAL D   9      -1.906  -3.007   9.510  1.00  0.00           C  
ATOM   3702  N   ILE D  10      -0.952  -7.483   8.777  1.00  0.00           N  
ATOM   3703  CA  ILE D  10      -0.366  -8.660   8.165  1.00  0.00           C  
ATOM   3704  C   ILE D  10      -1.499  -9.451   7.527  1.00  0.00           C  
ATOM   3705  O   ILE D  10      -1.447  -9.847   6.357  1.00  0.00           O  
ATOM   3706  CB  ILE D  10       0.388  -9.526   9.191  1.00  0.00           C  
ATOM   3707  CG1 ILE D  10       1.679  -8.831   9.629  1.00  0.00           C  
ATOM   3708  CG2 ILE D  10       0.690 -10.898   8.609  1.00  0.00           C  
ATOM   3709  CD1 ILE D  10       2.330  -9.459  10.840  1.00  0.00           C  
ATOM   3710  N   ALA D  11      -2.640  -9.663   8.219  1.00  0.00           N  
ATOM   3711  CA  ALA D  11      -3.809 -10.308   7.676  1.00  0.00           C  
ATOM   3712  C   ALA D  11      -4.483  -9.682   6.418  1.00  0.00           C  
ATOM   3713  O   ALA D  11      -4.819 -10.434   5.545  1.00  0.00           O  
ATOM   3714  CB  ALA D  11      -4.830 -10.407   8.850  1.00  0.00           C  
ATOM   3715  N   ILE D  12      -4.563  -8.346   6.373  1.00  0.00           N  
ATOM   3716  CA  ILE D  12      -5.064  -7.548   5.300  1.00  0.00           C  
ATOM   3717  C   ILE D  12      -4.142  -7.743   4.061  1.00  0.00           C  
ATOM   3718  O   ILE D  12      -4.552  -7.784   2.887  1.00  0.00           O  
ATOM   3719  CB  ILE D  12      -5.134  -6.065   5.709  1.00  0.00           C  
ATOM   3720  CG1 ILE D  12      -6.183  -5.863   6.806  1.00  0.00           C  
ATOM   3721  CG2 ILE D  12      -5.447  -5.195   4.502  1.00  0.00           C  
ATOM   3722  CD1 ILE D  12      -7.586  -6.240   6.386  1.00  0.00           C  
ATOM   3723  N   VAL D  13      -2.851  -7.818   4.294  1.00  0.00           N  
ATOM   3724  CA  VAL D  13      -1.796  -8.050   3.208  1.00  0.00           C  
ATOM   3725  C   VAL D  13      -2.125  -9.443   2.581  1.00  0.00           C  
ATOM   3726  O   VAL D  13      -2.226  -9.615   1.363  1.00  0.00           O  
ATOM   3727  CB  VAL D  13      -0.365  -8.048   3.777  1.00  0.00           C  
ATOM   3728  CG1 VAL D  13       0.629  -8.509   2.722  1.00  0.00           C  
ATOM   3729  CG2 VAL D  13      -0.010  -6.658   4.282  1.00  0.00           C  
ATOM   3730  N   GLY D  14      -2.426 -10.417   3.452  1.00  0.00           N  
ATOM   3731  CA  GLY D  14      -2.885 -11.749   3.123  1.00  0.00           C  
ATOM   3732  C   GLY D  14      -4.138 -11.749   2.314  1.00  0.00           C  
ATOM   3733  O   GLY D  14      -4.172 -12.491   1.328  1.00  0.00           O  
ATOM   3734  N   ILE D  15      -5.121 -10.923   2.713  1.00  0.00           N  
ATOM   3735  CA  ILE D  15      -6.320 -10.796   1.964  1.00  0.00           C  
ATOM   3736  C   ILE D  15      -6.032 -10.158   0.565  1.00  0.00           C  
ATOM   3737  O   ILE D  15      -6.423 -10.739  -0.426  1.00  0.00           O  
ATOM   3738  CB  ILE D  15      -7.341  -9.953   2.750  1.00  0.00           C  
ATOM   3739  CG1 ILE D  15      -7.764 -10.681   4.028  1.00  0.00           C  
ATOM   3740  CG2 ILE D  15      -8.553  -9.643   1.885  1.00  0.00           C  
ATOM   3741  CD1 ILE D  15      -8.433 -12.013   3.780  1.00  0.00           C  
ATOM   3742  N   LEU D  16      -5.200  -9.161   0.541  1.00  0.00           N  
ATOM   3743  CA  LEU D  16      -4.788  -8.506  -0.759  1.00  0.00           C  
ATOM   3744  C   LEU D  16      -4.208  -9.531  -1.785  1.00  0.00           C  
ATOM   3745  O   LEU D  16      -4.570  -9.466  -2.940  1.00  0.00           O  
ATOM   3746  CB  LEU D  16      -3.744  -7.414  -0.494  1.00  0.00           C  
ATOM   3747  CG  LEU D  16      -3.248  -6.654  -1.730  1.00  0.00           C  
ATOM   3748  CD1 LEU D  16      -4.420  -5.947  -2.397  1.00  0.00           C  
ATOM   3749  CD2 LEU D  16      -2.173  -5.659  -1.316  1.00  0.00           C  
ATOM   3750  N   ALA D  17      -3.378 -10.487  -1.347  1.00  0.00           N  
ATOM   3751  CA  ALA D  17      -2.811 -11.624  -2.101  1.00  0.00           C  
ATOM   3752  C   ALA D  17      -3.952 -12.533  -2.643  1.00  0.00           C  
ATOM   3753  O   ALA D  17      -4.052 -12.855  -3.824  1.00  0.00           O  
ATOM   3754  CB  ALA D  17      -1.776 -12.322  -1.218  1.00  0.00           C  
ATOM   3755  N   ALA D  18      -4.912 -12.868  -1.763  1.00  0.00           N  
ATOM   3756  CA  ALA D  18      -6.116 -13.625  -2.133  1.00  0.00           C  
ATOM   3757  C   ALA D  18      -6.960 -12.814  -3.175  1.00  0.00           C  
ATOM   3758  O   ALA D  18      -7.584 -13.436  -4.145  1.00  0.00           O  
ATOM   3759  CB  ALA D  18      -6.993 -13.914  -0.956  1.00  0.00           C  
ATOM   3760  N   VAL D  19      -7.089 -11.489  -3.139  1.00  0.00           N  
ATOM   3761  CA  VAL D  19      -7.730 -10.584  -4.059  1.00  0.00           C  
ATOM   3762  C   VAL D  19      -6.885 -10.516  -5.420  1.00  0.00           C  
ATOM   3763  O   VAL D  19      -7.400 -10.494  -6.519  1.00  0.00           O  
ATOM   3764  CB  VAL D  19      -7.847  -9.192  -3.409  1.00  0.00           C  
ATOM   3765  CG1 VAL D  19      -8.331  -8.169  -4.426  1.00  0.00           C  
ATOM   3766  CG2 VAL D  19      -8.790  -9.255  -2.217  1.00  0.00           C  
ATOM   3767  N   ALA D  20      -5.557 -10.433  -5.374  1.00  0.00           N  
ATOM   3768  CA  ALA D  20      -4.587 -10.387  -6.539  1.00  0.00           C  
ATOM   3769  C   ALA D  20      -4.620 -11.694  -7.424  1.00  0.00           C  
ATOM   3770  O   ALA D  20      -4.779 -11.560  -8.620  1.00  0.00           O  
ATOM   3771  CB  ALA D  20      -3.115 -10.298  -6.062  1.00  0.00           C  
ATOM   3772  N   LEU D  21      -4.796 -12.886  -6.833  1.00  0.00           N  
ATOM   3773  CA  LEU D  21      -4.810 -14.197  -7.446  1.00  0.00           C  
ATOM   3774  C   LEU D  21      -5.836 -14.305  -8.638  1.00  0.00           C  
ATOM   3775  O   LEU D  21      -5.386 -14.699  -9.695  1.00  0.00           O  
ATOM   3776  CB  LEU D  21      -5.134 -15.242  -6.371  1.00  0.00           C  
ATOM   3777  CG  LEU D  21      -5.411 -16.661  -6.884  1.00  0.00           C  
ATOM   3778  CD1 LEU D  21      -4.177 -17.192  -7.601  1.00  0.00           C  
ATOM   3779  CD2 LEU D  21      -5.793 -17.558  -5.716  1.00  0.00           C  
ATOM   3780  N   PRO D  22      -7.158 -14.135  -8.450  1.00  0.00           N  
ATOM   3781  CA  PRO D  22      -8.104 -14.264  -9.521  1.00  0.00           C  
ATOM   3782  C   PRO D  22      -8.022 -13.029 -10.571  1.00  0.00           C  
ATOM   3783  O   PRO D  22      -8.237 -13.282 -11.759  1.00  0.00           O  
ATOM   3784  CB  PRO D  22      -9.423 -14.295  -8.744  1.00  0.00           C  
ATOM   3785  CG  PRO D  22      -9.166 -13.435  -7.553  1.00  0.00           C  
ATOM   3786  CD  PRO D  22      -7.745 -13.746  -7.167  1.00  0.00           C  
ATOM   3787  N   ALA D  23      -7.599 -11.821 -10.119  1.00  0.00           N  
ATOM   3788  CA  ALA D  23      -7.333 -10.639 -10.995  1.00  0.00           C  
ATOM   3789  C   ALA D  23      -6.097 -10.818 -11.904  1.00  0.00           C  
ATOM   3790  O   ALA D  23      -6.227 -10.639 -13.090  1.00  0.00           O  
ATOM   3791  CB  ALA D  23      -7.216  -9.452  -9.990  1.00  0.00           C  
ATOM   3792  N   TYR D  24      -4.974 -11.275 -11.394  1.00  0.00           N  
ATOM   3793  CA  TYR D  24      -3.877 -11.689 -12.159  1.00  0.00           C  
ATOM   3794  C   TYR D  24      -4.161 -12.822 -13.150  1.00  0.00           C  
ATOM   3795  O   TYR D  24      -3.816 -12.582 -14.339  1.00  0.00           O  
ATOM   3796  CB  TYR D  24      -2.753 -12.089 -11.200  1.00  0.00           C  
ATOM   3797  CG  TYR D  24      -1.502 -12.578 -11.896  1.00  0.00           C  
ATOM   3798  CD1 TYR D  24      -0.534 -11.670 -12.300  1.00  0.00           C  
ATOM   3799  CD2 TYR D  24      -1.323 -13.933 -12.130  1.00  0.00           C  
ATOM   3800  CE1 TYR D  24       0.609 -12.116 -12.936  1.00  0.00           C  
ATOM   3801  CE2 TYR D  24      -0.180 -14.379 -12.765  1.00  0.00           C  
ATOM   3802  CZ  TYR D  24       0.783 -13.476 -13.168  1.00  0.00           C  
ATOM   3803  OH  TYR D  24       1.921 -13.921 -13.801  1.00  0.00           O  
ATOM   3804  N   GLN D  25      -4.797 -13.973 -12.830  1.00  0.00           N  
ATOM   3805  CA  GLN D  25      -5.196 -15.022 -13.737  1.00  0.00           C  
ATOM   3806  C   GLN D  25      -6.090 -14.537 -14.903  1.00  0.00           C  
ATOM   3807  O   GLN D  25      -5.744 -14.796 -16.030  1.00  0.00           O  
ATOM   3808  CB  GLN D  25      -5.918 -16.118 -12.947  1.00  0.00           C  
ATOM   3809  CG  GLN D  25      -5.012 -16.929 -12.037  1.00  0.00           C  
ATOM   3810  CD  GLN D  25      -5.785 -17.910 -11.176  1.00  0.00           C  
ATOM   3811  NE2 GLN D  25      -5.099 -18.940 -10.693  1.00  0.00           N  
ATOM   3812  OE1 GLN D  25      -6.986 -17.744 -10.947  1.00  0.00           O  
ATOM   3813  N   ASP D  26      -7.153 -13.823 -14.621  1.00  0.00           N  
ATOM   3814  CA  ASP D  26      -7.972 -13.255 -15.688  1.00  0.00           C  
ATOM   3815  C   ASP D  26      -7.341 -12.267 -16.652  1.00  0.00           C  
ATOM   3816  O   ASP D  26      -7.431 -12.440 -17.823  1.00  0.00           O  
ATOM   3817  CB  ASP D  26      -9.186 -12.573 -15.053  1.00  0.00           C  
ATOM   3818  CG  ASP D  26     -10.200 -12.091 -16.083  1.00  0.00           C  
ATOM   3819  OD1 ASP D  26     -10.775 -12.916 -16.752  1.00  0.00           O  
ATOM   3820  OD2 ASP D  26     -10.389 -10.903 -16.189  1.00  0.00           O1-
ATOM   3821  N   TYR D  27      -6.575 -11.275 -16.172  1.00  0.00           N  
ATOM   3822  CA  TYR D  27      -5.823 -10.288 -16.951  1.00  0.00           C  
ATOM   3823  C   TYR D  27      -4.772 -10.930 -17.881  1.00  0.00           C  
ATOM   3824  O   TYR D  27      -4.689 -10.666 -19.072  1.00  0.00           O  
ATOM   3825  CB  TYR D  27      -5.149  -9.288 -16.009  1.00  0.00           C  
ATOM   3826  CG  TYR D  27      -4.185  -8.351 -16.702  1.00  0.00           C  
ATOM   3827  CD1 TYR D  27      -4.643  -7.487 -17.686  1.00  0.00           C  
ATOM   3828  CD2 TYR D  27      -2.842  -8.356 -16.353  1.00  0.00           C  
ATOM   3829  CE1 TYR D  27      -3.762  -6.632 -18.318  1.00  0.00           C  
ATOM   3830  CE2 TYR D  27      -1.962  -7.500 -16.985  1.00  0.00           C  
ATOM   3831  CZ  TYR D  27      -2.417  -6.641 -17.964  1.00  0.00           C  
ATOM   3832  OH  TYR D  27      -1.540  -5.789 -18.594  1.00  0.00           O  
ATOM   3833  N   THR D  28      -3.941 -11.770 -17.349  1.00  0.00           N  
ATOM   3834  CA  THR D  28      -2.862 -12.436 -18.055  1.00  0.00           C  
ATOM   3835  C   THR D  28      -3.382 -13.533 -19.061  1.00  0.00           C  
ATOM   3836  O   THR D  28      -2.815 -13.731 -20.123  1.00  0.00           O  
ATOM   3837  CB  THR D  28      -1.885 -13.062 -17.043  1.00  0.00           C  
ATOM   3838  CG2 THR D  28      -1.257 -11.986 -16.172  1.00  0.00           C  
ATOM   3839  OG1 THR D  28      -2.587 -13.995 -16.212  1.00  0.00           O  
ATOM   3840  N   ALA D  29      -4.542 -14.130 -18.740  1.00  0.00           N  
ATOM   3841  CA  ALA D  29      -5.189 -15.021 -19.622  1.00  0.00           C  
ATOM   3842  C   ALA D  29      -5.565 -14.321 -20.952  1.00  0.00           C  
ATOM   3843  O   ALA D  29      -5.273 -14.886 -21.996  1.00  0.00           O  
ATOM   3844  CB  ALA D  29      -6.513 -15.537 -18.937  1.00  0.00           C  
ATOM   3845  N   ARG D  30      -6.124 -13.104 -20.907  1.00  0.00           N  
ATOM   3846  CA  ARG D  30      -6.396 -12.248 -22.052  1.00  0.00           C  
ATOM   3847  C   ARG D  30      -5.145 -11.990 -22.867  1.00  0.00           C  
ATOM   3848  O   ARG D  30      -5.071 -12.023 -24.094  1.00  0.00           O  
ATOM   3849  CB  ARG D  30      -6.980 -10.918 -21.599  1.00  0.00           C  
ATOM   3850  CG  ARG D  30      -7.295  -9.942 -22.721  1.00  0.00           C  
ATOM   3851  CD  ARG D  30      -7.884  -8.681 -22.203  1.00  0.00           C  
ATOM   3852  NE  ARG D  30      -8.150  -7.728 -23.269  1.00  0.00           N  
ATOM   3853  CZ  ARG D  30      -7.253  -6.842 -23.744  1.00  0.00           C  
ATOM   3854  NH1 ARG D  30      -6.040  -6.799 -23.238  1.00  0.00           N1+
ATOM   3855  NH2 ARG D  30      -7.593  -6.016 -24.718  1.00  0.00           N  
ATOM   3856  N   ALA D  31      -4.037 -11.631 -22.226  1.00  0.00           N  
ATOM   3857  CA  ALA D  31      -2.714 -11.490 -22.844  1.00  0.00           C  
ATOM   3858  C   ALA D  31      -2.133 -12.725 -23.541  1.00  0.00           C  
ATOM   3859  O   ALA D  31      -1.451 -12.601 -24.584  1.00  0.00           O  
ATOM   3860  CB  ALA D  31      -1.660 -10.907 -21.871  1.00  0.00           C  
ATOM   3861  N   GLN D  32      -2.310 -13.934 -22.890  1.00  0.00           N  
ATOM   3862  CA  GLN D  32      -1.914 -15.271 -23.386  1.00  0.00           C  
ATOM   3863  C   GLN D  32      -2.603 -15.664 -24.725  1.00  0.00           C  
ATOM   3864  O   GLN D  32      -1.890 -16.013 -25.678  1.00  0.00           O  
ATOM   3865  CB  GLN D  32      -2.223 -16.329 -22.322  1.00  0.00           C  
ATOM   3866  CG  GLN D  32      -1.321 -16.265 -21.101  1.00  0.00           C  
ATOM   3867  CD  GLN D  32      -1.904 -17.004 -19.912  1.00  0.00           C  
ATOM   3868  NE2 GLN D  32      -1.292 -16.825 -18.747  1.00  0.00           N  
ATOM   3869  OE1 GLN D  32      -2.894 -17.730 -20.039  1.00  0.00           O  
ATOM   3870  N   VAL D  33      -3.908 -15.465 -24.776  1.00  0.00           N  
ATOM   3871  CA  VAL D  33      -4.886 -15.675 -25.897  1.00  0.00           C  
ATOM   3872  C   VAL D  33      -4.633 -14.710 -27.075  1.00  0.00           C  
ATOM   3873  O   VAL D  33      -4.646 -15.065 -28.250  1.00  0.00           O  
ATOM   3874  CB  VAL D  33      -6.329 -15.478 -25.395  1.00  0.00           C  
ATOM   3875  CG1 VAL D  33      -7.304 -15.489 -26.563  1.00  0.00           C  
ATOM   3876  CG2 VAL D  33      -6.680 -16.564 -24.389  1.00  0.00           C  
ATOM   3877  N   SER D  34      -4.528 -13.418 -26.742  1.00  0.00           N  
ATOM   3878  CA  SER D  34      -4.194 -12.359 -27.734  1.00  0.00           C  
ATOM   3879  C   SER D  34      -2.784 -12.496 -28.347  1.00  0.00           C  
ATOM   3880  O   SER D  34      -2.764 -12.238 -29.557  1.00  0.00           O  
ATOM   3881  CB  SER D  34      -4.317 -10.996 -27.081  1.00  0.00           C  
ATOM   3882  OG  SER D  34      -3.363 -10.837 -26.067  1.00  0.00           O  
ATOM   3883  N   GLU D  35      -1.804 -13.097 -27.623  1.00  0.00           N  
ATOM   3884  CA  GLU D  35      -0.535 -13.486 -28.325  1.00  0.00           C  
ATOM   3885  C   GLU D  35      -0.869 -14.485 -29.463  1.00  0.00           C  
ATOM   3886  O   GLU D  35      -0.402 -14.355 -30.620  1.00  0.00           O  
ATOM   3887  CB  GLU D  35       0.467 -14.111 -27.353  1.00  0.00           C  
ATOM   3888  CG  GLU D  35       1.777 -14.547 -27.994  1.00  0.00           C  
ATOM   3889  CD  GLU D  35       2.768 -15.078 -26.996  1.00  0.00           C  
ATOM   3890  OE1 GLU D  35       2.539 -16.138 -26.464  1.00  0.00           O  
ATOM   3891  OE2 GLU D  35       3.757 -14.422 -26.764  1.00  0.00           O1-
ATOM   3892  N   ALA D  36      -1.645 -15.495 -29.170  1.00  0.00           N  
ATOM   3893  CA  ALA D  36      -2.035 -16.465 -30.234  1.00  0.00           C  
ATOM   3894  C   ALA D  36      -2.735 -15.845 -31.382  1.00  0.00           C  
ATOM   3895  O   ALA D  36      -2.481 -16.226 -32.500  1.00  0.00           O  
ATOM   3896  CB  ALA D  36      -2.851 -17.558 -29.536  1.00  0.00           C  
ATOM   3897  N   ILE D  37      -3.598 -14.914 -31.084  1.00  0.00           N  
ATOM   3898  CA  ILE D  37      -4.334 -14.243 -32.167  1.00  0.00           C  
ATOM   3899  C   ILE D  37      -3.402 -13.474 -33.038  1.00  0.00           C  
ATOM   3900  O   ILE D  37      -3.562 -13.498 -34.219  1.00  0.00           O  
ATOM   3901  CB  ILE D  37      -5.409 -13.287 -31.620  1.00  0.00           C  
ATOM   3902  CG1 ILE D  37      -6.492 -14.072 -30.874  1.00  0.00           C  
ATOM   3903  CG2 ILE D  37      -6.021 -12.471 -32.749  1.00  0.00           C  
ATOM   3904  CD1 ILE D  37      -7.224 -15.074 -31.738  1.00  0.00           C  
ATOM   3905  N   LEU D  38      -2.449 -12.747 -32.430  1.00  0.00           N  
ATOM   3906  CA  LEU D  38      -1.469 -11.927 -33.182  1.00  0.00           C  
ATOM   3907  C   LEU D  38      -0.612 -12.809 -34.108  1.00  0.00           C  
ATOM   3908  O   LEU D  38      -0.370 -12.566 -35.297  1.00  0.00           O  
ATOM   3909  CB  LEU D  38      -0.560 -11.158 -32.216  1.00  0.00           C  
ATOM   3910  CG  LEU D  38       0.546 -10.319 -32.868  1.00  0.00           C  
ATOM   3911  CD1 LEU D  38      -0.069  -9.371 -33.888  1.00  0.00           C  
ATOM   3912  CD2 LEU D  38       1.301  -9.550 -31.794  1.00  0.00           C  
ATOM   3913  N   LEU D  39      -0.187 -13.947 -33.574  1.00  0.00           N  
ATOM   3914  CA  LEU D  39       0.649 -15.003 -34.254  1.00  0.00           C  
ATOM   3915  C   LEU D  39      -0.228 -15.536 -35.448  1.00  0.00           C  
ATOM   3916  O   LEU D  39       0.337 -15.858 -36.477  1.00  0.00           O  
ATOM   3917  CB  LEU D  39       1.021 -16.140 -33.293  1.00  0.00           C  
ATOM   3918  CG  LEU D  39       2.095 -15.805 -32.251  1.00  0.00           C  
ATOM   3919  CD1 LEU D  39       2.191 -16.937 -31.238  1.00  0.00           C  
ATOM   3920  CD2 LEU D  39       3.429 -15.581 -32.949  1.00  0.00           C  
ATOM   3921  N   ALA D  40      -1.514 -15.750 -35.280  1.00  0.00           N  
ATOM   3922  CA  ALA D  40      -2.386 -16.099 -36.315  1.00  0.00           C  
ATOM   3923  C   ALA D  40      -2.633 -15.054 -37.443  1.00  0.00           C  
ATOM   3924  O   ALA D  40      -2.848 -15.335 -38.616  1.00  0.00           O  
ATOM   3925  CB  ALA D  40      -3.696 -16.459 -35.587  1.00  0.00           C  
ATOM   3926  N   GLU D  41      -2.662 -13.771 -37.033  1.00  0.00           N  
ATOM   3927  CA  GLU D  41      -2.731 -12.595 -37.952  1.00  0.00           C  
ATOM   3928  C   GLU D  41      -1.487 -12.475 -38.843  1.00  0.00           C  
ATOM   3929  O   GLU D  41      -0.337 -12.593 -38.381  1.00  0.00           O  
ATOM   3930  CB  GLU D  41      -2.902 -11.301 -37.152  1.00  0.00           C  
ATOM   3931  CG  GLU D  41      -4.240 -11.176 -36.437  1.00  0.00           C  
ATOM   3932  CD  GLU D  41      -5.391 -10.971 -37.383  1.00  0.00           C  
ATOM   3933  OE1 GLU D  41      -5.261 -10.177 -38.283  1.00  0.00           O  
ATOM   3934  OE2 GLU D  41      -6.401 -11.610 -37.203  1.00  0.00           O1-
ATOM   3935  N   GLY D  42      -1.701 -12.084 -40.156  1.00  0.00           N  
ATOM   3936  CA  GLY D  42      -0.632 -12.020 -41.181  1.00  0.00           C  
ATOM   3937  C   GLY D  42      -0.391 -13.426 -41.840  1.00  0.00           C  
ATOM   3938  O   GLY D  42      -0.275 -13.458 -43.066  1.00  0.00           O  
ATOM   3939  N   GLN D  43      -0.340 -14.485 -41.000  1.00  0.00           N  
ATOM   3940  CA  GLN D  43      -0.322 -15.877 -41.445  1.00  0.00           C  
ATOM   3941  C   GLN D  43      -1.654 -16.135 -42.226  1.00  0.00           C  
ATOM   3942  O   GLN D  43      -1.652 -16.677 -43.344  1.00  0.00           O  
ATOM   3943  CB  GLN D  43      -0.177 -16.833 -40.257  1.00  0.00           C  
ATOM   3944  CG  GLN D  43      -0.080 -18.298 -40.646  1.00  0.00           C  
ATOM   3945  CD  GLN D  43       0.139 -19.201 -39.447  1.00  0.00           C  
ATOM   3946  NE2 GLN D  43       0.609 -20.417 -39.702  1.00  0.00           N  
ATOM   3947  OE1 GLN D  43      -0.111 -18.810 -38.303  1.00  0.00           O  
ATOM   3948  N   LYS D  44      -2.807 -15.691 -41.771  1.00  0.00           N  
ATOM   3949  CA  LYS D  44      -4.135 -15.791 -42.346  1.00  0.00           C  
ATOM   3950  C   LYS D  44      -4.177 -14.979 -43.727  1.00  0.00           C  
ATOM   3951  O   LYS D  44      -4.951 -15.299 -44.598  1.00  0.00           O  
ATOM   3952  CB  LYS D  44      -5.172 -15.270 -41.350  1.00  0.00           C  
ATOM   3953  CG  LYS D  44      -5.279 -13.752 -41.289  1.00  0.00           C  
ATOM   3954  CD  LYS D  44      -6.413 -13.315 -40.373  1.00  0.00           C  
ATOM   3955  CE  LYS D  44      -6.750 -11.844 -40.572  1.00  0.00           C  
ATOM   3956  NZ  LYS D  44      -7.820 -11.388 -39.644  1.00  0.00           N1+
ATOM   3957  N   SER D  45      -3.345 -13.947 -43.846  1.00  0.00           N  
ATOM   3958  CA  SER D  45      -3.198 -13.173 -45.075  1.00  0.00           C  
ATOM   3959  C   SER D  45      -2.405 -13.948 -46.146  1.00  0.00           C  
ATOM   3960  O   SER D  45      -2.888 -14.001 -47.255  1.00  0.00           O  
ATOM   3961  CB  SER D  45      -2.509 -11.857 -44.772  1.00  0.00           C  
ATOM   3962  OG  SER D  45      -3.310 -11.047 -43.955  1.00  0.00           O  
ATOM   3963  N   ALA D  46      -1.343 -14.637 -45.740  1.00  0.00           N  
ATOM   3964  CA  ALA D  46      -0.752 -15.613 -46.675  1.00  0.00           C  
ATOM   3965  C   ALA D  46      -1.662 -16.799 -47.133  1.00  0.00           C  
ATOM   3966  O   ALA D  46      -1.719 -17.183 -48.343  1.00  0.00           O  
ATOM   3967  CB  ALA D  46       0.517 -16.152 -45.974  1.00  0.00           C  
ATOM   3968  N   VAL D  47      -2.488 -17.336 -46.209  1.00  0.00           N  
ATOM   3969  CA  VAL D  47      -3.526 -18.342 -46.497  1.00  0.00           C  
ATOM   3970  C   VAL D  47      -4.555 -17.654 -47.435  1.00  0.00           C  
ATOM   3971  O   VAL D  47      -5.017 -18.292 -48.343  1.00  0.00           O  
ATOM   3972  CB  VAL D  47      -4.209 -18.831 -45.206  1.00  0.00           C  
ATOM   3973  CG1 VAL D  47      -5.406 -19.710 -45.537  1.00  0.00           C  
ATOM   3974  CG2 VAL D  47      -3.208 -19.586 -44.345  1.00  0.00           C  
ATOM   3975  N   THR D  48      -4.994 -16.448 -47.129  1.00  0.00           N  
ATOM   3976  CA  THR D  48      -5.824 -15.756 -48.095  1.00  0.00           C  
ATOM   3977  C   THR D  48      -5.258 -15.621 -49.490  1.00  0.00           C  
ATOM   3978  O   THR D  48      -5.995 -15.957 -50.432  1.00  0.00           O  
ATOM   3979  CB  THR D  48      -6.163 -14.348 -47.572  1.00  0.00           C  
ATOM   3980  CG2 THR D  48      -6.983 -13.581 -48.598  1.00  0.00           C  
ATOM   3981  OG1 THR D  48      -6.909 -14.455 -46.353  1.00  0.00           O  
ATOM   3982  N   GLU D  49      -4.010 -15.214 -49.620  1.00  0.00           N  
ATOM   3983  CA  GLU D  49      -3.311 -15.055 -50.914  1.00  0.00           C  
ATOM   3984  C   GLU D  49      -3.175 -16.353 -51.704  1.00  0.00           C  
ATOM   3985  O   GLU D  49      -3.426 -16.360 -52.907  1.00  0.00           O  
ATOM   3986  CB  GLU D  49      -1.918 -14.466 -50.686  1.00  0.00           C  
ATOM   3987  CG  GLU D  49      -1.918 -13.028 -50.186  1.00  0.00           C  
ATOM   3988  CD  GLU D  49      -2.374 -12.046 -51.229  1.00  0.00           C  
ATOM   3989  OE1 GLU D  49      -1.812 -12.040 -52.298  1.00  0.00           O  
ATOM   3990  OE2 GLU D  49      -3.285 -11.301 -50.956  1.00  0.00           O1-
ATOM   3991  N   TYR D  50      -2.954 -17.525 -51.019  1.00  0.00           N  
ATOM   3992  CA  TYR D  50      -3.017 -18.815 -51.621  1.00  0.00           C  
ATOM   3993  C   TYR D  50      -4.487 -19.220 -52.105  1.00  0.00           C  
ATOM   3994  O   TYR D  50      -4.772 -19.555 -53.246  1.00  0.00           O  
ATOM   3995  CB  TYR D  50      -2.456 -19.832 -50.626  1.00  0.00           C  
ATOM   3996  CG  TYR D  50      -2.371 -21.240 -51.174  1.00  0.00           C  
ATOM   3997  CD1 TYR D  50      -1.160 -21.732 -51.638  1.00  0.00           C  
ATOM   3998  CD2 TYR D  50      -3.504 -22.038 -51.211  1.00  0.00           C  
ATOM   3999  CE1 TYR D  50      -1.083 -23.017 -52.139  1.00  0.00           C  
ATOM   4000  CE2 TYR D  50      -3.427 -23.324 -51.711  1.00  0.00           C  
ATOM   4001  CZ  TYR D  50      -2.223 -23.813 -52.174  1.00  0.00           C  
ATOM   4002  OH  TYR D  50      -2.146 -25.093 -52.672  1.00  0.00           O  
ATOM   4003  N   TYR D  51      -5.463 -19.197 -51.147  1.00  0.00           N  
ATOM   4004  CA  TYR D  51      -6.861 -19.601 -51.423  1.00  0.00           C  
ATOM   4005  C   TYR D  51      -7.599 -18.830 -52.577  1.00  0.00           C  
ATOM   4006  O   TYR D  51      -8.107 -19.382 -53.551  1.00  0.00           O  
ATOM   4007  CB  TYR D  51      -7.669 -19.472 -50.130  1.00  0.00           C  
ATOM   4008  CG  TYR D  51      -9.120 -19.871 -50.274  1.00  0.00           C  
ATOM   4009  CD1 TYR D  51      -9.452 -21.183 -50.576  1.00  0.00           C  
ATOM   4010  CD2 TYR D  51     -10.120 -18.924 -50.105  1.00  0.00           C  
ATOM   4011  CE1 TYR D  51     -10.778 -21.548 -50.708  1.00  0.00           C  
ATOM   4012  CE2 TYR D  51     -11.446 -19.288 -50.237  1.00  0.00           C  
ATOM   4013  CZ  TYR D  51     -11.776 -20.594 -50.537  1.00  0.00           C  
ATOM   4014  OH  TYR D  51     -13.097 -20.957 -50.668  1.00  0.00           O  
ATOM   4015  N   LEU D  52      -7.537 -17.520 -52.407  1.00  0.00           N  
ATOM   4016  CA  LEU D  52      -8.031 -16.595 -53.400  1.00  0.00           C  
ATOM   4017  C   LEU D  52      -7.522 -16.699 -54.900  1.00  0.00           C  
ATOM   4018  O   LEU D  52      -8.279 -16.272 -55.772  1.00  0.00           O  
ATOM   4019  CB  LEU D  52      -7.727 -15.189 -52.867  1.00  0.00           C  
ATOM   4020  CG  LEU D  52      -8.288 -14.027 -53.698  1.00  0.00           C  
ATOM   4021  CD1 LEU D  52      -9.805 -14.137 -53.767  1.00  0.00           C  
ATOM   4022  CD2 LEU D  52      -7.862 -12.706 -53.075  1.00  0.00           C  
ATOM   4023  N   ASN D  53      -6.317 -17.094 -55.200  1.00  0.00           N  
ATOM   4024  CA  ASN D  53      -5.729 -17.229 -56.483  1.00  0.00           C  
ATOM   4025  C   ASN D  53      -5.657 -18.704 -56.934  1.00  0.00           C  
ATOM   4026  O   ASN D  53      -5.821 -18.964 -58.097  1.00  0.00           O  
ATOM   4027  CB  ASN D  53      -4.332 -16.642 -56.455  1.00  0.00           C  
ATOM   4028  CG  ASN D  53      -4.337 -15.105 -56.257  1.00  0.00           C  
ATOM   4029  ND2 ASN D  53      -4.022 -14.570 -55.105  1.00  0.00           N  
ATOM   4030  OD1 ASN D  53      -4.710 -14.384 -57.157  1.00  0.00           O  
ATOM   4031  N   HIS D  54      -5.494 -19.702 -56.053  1.00  0.00           N  
ATOM   4032  CA  HIS D  54      -5.472 -21.120 -56.362  1.00  0.00           C  
ATOM   4033  C   HIS D  54      -6.846 -21.819 -56.452  1.00  0.00           C  
ATOM   4034  O   HIS D  54      -7.144 -22.687 -57.254  1.00  0.00           O  
ATOM   4035  CB  HIS D  54      -4.617 -21.840 -55.313  1.00  0.00           C  
ATOM   4036  CG  HIS D  54      -3.167 -21.470 -55.362  1.00  0.00           C  
ATOM   4037  CD2 HIS D  54      -2.089 -22.147 -55.823  1.00  0.00           C  
ATOM   4038  ND1 HIS D  54      -2.692 -20.262 -54.896  1.00  0.00           N  
ATOM   4039  CE1 HIS D  54      -1.382 -20.213 -55.067  1.00  0.00           C  
ATOM   4040  NE2 HIS D  54      -0.993 -21.343 -55.627  1.00  0.00           N  
ATOM   4041  N   GLY D  55      -7.800 -21.360 -55.550  1.00  0.00           N  
ATOM   4042  CA  GLY D  55      -9.183 -21.868 -55.445  1.00  0.00           C  
ATOM   4043  C   GLY D  55      -9.365 -22.803 -54.269  1.00  0.00           C  
ATOM   4044  O   GLY D  55     -10.509 -22.791 -53.812  1.00  0.00           O  
ATOM   4045  N   LYS D  56      -8.386 -23.566 -53.877  1.00  0.00           N  
ATOM   4046  CA  LYS D  56      -8.559 -24.468 -52.728  1.00  0.00           C  
ATOM   4047  C   LYS D  56      -7.682 -24.082 -51.531  1.00  0.00           C  
ATOM   4048  O   LYS D  56      -6.769 -23.356 -51.627  1.00  0.00           O  
ATOM   4049  CB  LYS D  56      -8.259 -25.909 -53.142  1.00  0.00           C  
ATOM   4050  CG  LYS D  56      -9.154 -26.444 -54.253  1.00  0.00           C  
ATOM   4051  CD  LYS D  56     -10.597 -26.571 -53.788  1.00  0.00           C  
ATOM   4052  CE  LYS D  56     -11.478 -27.172 -54.872  1.00  0.00           C  
ATOM   4053  NZ  LYS D  56     -12.881 -27.356 -54.411  1.00  0.00           N1+
ATOM   4054  N   TRP D  57      -8.082 -24.492 -50.335  1.00  0.00           N  
ATOM   4055  CA  TRP D  57      -7.349 -24.065 -49.095  1.00  0.00           C  
ATOM   4056  C   TRP D  57      -5.993 -24.750 -48.995  1.00  0.00           C  
ATOM   4057  O   TRP D  57      -5.863 -25.923 -49.414  1.00  0.00           O  
ATOM   4058  CB  TRP D  57      -8.161 -24.384 -47.839  1.00  0.00           C  
ATOM   4059  CG  TRP D  57      -9.394 -23.545 -47.694  1.00  0.00           C  
ATOM   4060  CD1 TRP D  57     -10.672 -23.916 -47.989  1.00  0.00           C  
ATOM   4061  CD2 TRP D  57      -9.474 -22.181 -47.214  1.00  0.00           C  
ATOM   4062  CE2 TRP D  57     -10.821 -21.813 -47.252  1.00  0.00           C  
ATOM   4063  CE3 TRP D  57      -8.523 -21.257 -46.762  1.00  0.00           C  
ATOM   4064  NE1 TRP D  57     -11.537 -22.882 -47.729  1.00  0.00           N  
ATOM   4065  CZ2 TRP D  57     -11.250 -20.556 -46.857  1.00  0.00           C  
ATOM   4066  CZ3 TRP D  57      -8.953 -19.997 -46.363  1.00  0.00           C  
ATOM   4067  CH2 TRP D  57     -10.282 -19.656 -46.409  1.00  0.00           C  
ATOM   4068  N   PRO D  58      -4.942 -23.971 -48.432  1.00  0.00           N  
ATOM   4069  CA  PRO D  58      -3.617 -24.637 -48.300  1.00  0.00           C  
ATOM   4070  C   PRO D  58      -3.591 -25.680 -47.179  1.00  0.00           C  
ATOM   4071  O   PRO D  58      -4.347 -25.565 -46.219  1.00  0.00           O  
ATOM   4072  CB  PRO D  58      -2.675 -23.469 -47.988  1.00  0.00           C  
ATOM   4073  CG  PRO D  58      -3.533 -22.492 -47.260  1.00  0.00           C  
ATOM   4074  CD  PRO D  58      -4.865 -22.571 -47.958  1.00  0.00           C  
ATOM   4075  N   GLU D  59      -2.819 -26.724 -47.309  1.00  0.00           N  
ATOM   4076  CA  GLU D  59      -2.691 -27.830 -46.321  1.00  0.00           C  
ATOM   4077  C   GLU D  59      -2.051 -27.506 -45.000  1.00  0.00           C  
ATOM   4078  O   GLU D  59      -2.580 -27.692 -43.907  1.00  0.00           O  
ATOM   4079  CB  GLU D  59      -1.898 -28.981 -46.944  1.00  0.00           C  
ATOM   4080  CG  GLU D  59      -1.715 -30.185 -46.030  1.00  0.00           C  
ATOM   4081  CD  GLU D  59      -0.953 -31.304 -46.683  1.00  0.00           C  
ATOM   4082  OE1 GLU D  59      -0.623 -31.178 -47.838  1.00  0.00           O  
ATOM   4083  OE2 GLU D  59      -0.702 -32.287 -46.027  1.00  0.00           O1-
ATOM   4084  N   ASN D  60      -0.858 -26.899 -45.003  1.00  0.00           N  
ATOM   4085  CA  ASN D  60       0.028 -26.543 -43.883  1.00  0.00           C  
ATOM   4086  C   ASN D  60       0.789 -25.269 -44.151  1.00  0.00           C  
ATOM   4087  O   ASN D  60       0.721 -24.518 -45.121  1.00  0.00           O  
ATOM   4088  CB  ASN D  60       0.996 -27.671 -43.579  1.00  0.00           C  
ATOM   4089  CG  ASN D  60       1.924 -27.960 -44.727  1.00  0.00           C  
ATOM   4090  ND2 ASN D  60       2.242 -29.215 -44.918  1.00  0.00           N  
ATOM   4091  OD1 ASN D  60       2.353 -27.046 -45.440  1.00  0.00           O  
ATOM   4092  N   ASN D  61       1.670 -24.910 -43.171  1.00  0.00           N  
ATOM   4093  CA  ASN D  61       2.510 -23.699 -43.148  1.00  0.00           C  
ATOM   4094  C   ASN D  61       3.376 -23.553 -44.394  1.00  0.00           C  
ATOM   4095  O   ASN D  61       3.486 -22.424 -44.906  1.00  0.00           O  
ATOM   4096  CB  ASN D  61       3.383 -23.687 -41.907  1.00  0.00           C  
ATOM   4097  CG  ASN D  61       2.604 -23.397 -40.655  1.00  0.00           C  
ATOM   4098  ND2 ASN D  61       3.258 -23.491 -39.525  1.00  0.00           N  
ATOM   4099  OD1 ASN D  61       1.408 -23.087 -40.711  1.00  0.00           O  
ATOM   4100  N   THR D  62       3.962 -24.589 -44.882  1.00  0.00           N  
ATOM   4101  CA  THR D  62       4.769 -24.602 -46.164  1.00  0.00           C  
ATOM   4102  C   THR D  62       4.041 -24.517 -47.522  1.00  0.00           C  
ATOM   4103  O   THR D  62       4.453 -23.931 -48.539  1.00  0.00           O  
ATOM   4104  CB  THR D  62       5.640 -25.871 -46.205  1.00  0.00           C  
ATOM   4105  CG2 THR D  62       6.551 -25.933 -44.988  1.00  0.00           C  
ATOM   4106  OG1 THR D  62       4.798 -27.031 -46.227  1.00  0.00           O  
ATOM   4107  N   SER D  63       2.801 -24.934 -47.465  1.00  0.00           N  
ATOM   4108  CA  SER D  63       1.869 -24.719 -48.582  1.00  0.00           C  
ATOM   4109  C   SER D  63       1.190 -23.394 -48.565  1.00  0.00           C  
ATOM   4110  O   SER D  63       1.036 -22.778 -49.633  1.00  0.00           O  
ATOM   4111  CB  SER D  63       0.806 -25.800 -48.586  1.00  0.00           C  
ATOM   4112  OG  SER D  63      -0.049 -25.668 -47.483  1.00  0.00           O  
ATOM   4113  N   ALA D  64       0.988 -22.737 -47.424  1.00  0.00           N  
ATOM   4114  CA  ALA D  64       0.360 -21.381 -47.314  1.00  0.00           C  
ATOM   4115  C   ALA D  64       1.292 -20.210 -47.579  1.00  0.00           C  
ATOM   4116  O   ALA D  64       0.880 -19.057 -47.744  1.00  0.00           O  
ATOM   4117  CB  ALA D  64      -0.226 -21.344 -45.849  1.00  0.00           C  
ATOM   4118  N   GLY D  65       2.632 -20.518 -47.581  1.00  0.00           N  
ATOM   4119  CA  GLY D  65       3.715 -19.476 -47.764  1.00  0.00           C  
ATOM   4120  C   GLY D  65       4.299 -18.857 -46.481  1.00  0.00           C  
ATOM   4121  O   GLY D  65       4.830 -17.725 -46.548  1.00  0.00           O  
ATOM   4122  N   VAL D  66       4.256 -19.525 -45.326  1.00  0.00           N  
ATOM   4123  CA  VAL D  66       4.816 -18.950 -44.114  1.00  0.00           C  
ATOM   4124  C   VAL D  66       5.955 -19.776 -43.406  1.00  0.00           C  
ATOM   4125  O   VAL D  66       6.431 -20.823 -43.998  1.00  0.00           O  
ATOM   4126  CB  VAL D  66       3.662 -18.733 -43.116  1.00  0.00           C  
ATOM   4127  CG1 VAL D  66       2.636 -17.769 -43.691  1.00  0.00           C  
ATOM   4128  CG2 VAL D  66       3.017 -20.067 -42.773  1.00  0.00           C  
ATOM   4129  N   ALA D  67       6.441 -19.284 -42.229  1.00  0.00           N  
ATOM   4130  CA  ALA D  67       7.498 -19.984 -41.548  1.00  0.00           C  
ATOM   4131  C   ALA D  67       7.139 -21.491 -41.464  1.00  0.00           C  
ATOM   4132  O   ALA D  67       6.087 -21.911 -40.958  1.00  0.00           O  
ATOM   4133  CB  ALA D  67       7.778 -19.384 -40.157  1.00  0.00           C  
ATOM   4134  N   SER D  68       8.125 -22.354 -41.790  1.00  0.00           N  
ATOM   4135  CA  SER D  68       7.951 -23.756 -42.026  1.00  0.00           C  
ATOM   4136  C   SER D  68       7.621 -24.514 -40.735  1.00  0.00           C  
ATOM   4137  O   SER D  68       7.024 -25.564 -40.809  1.00  0.00           O  
ATOM   4138  CB  SER D  68       9.208 -24.321 -42.659  1.00  0.00           C  
ATOM   4139  OG  SER D  68      10.290 -24.256 -41.771  1.00  0.00           O  
ATOM   4140  N   SER D  69       8.135 -24.088 -39.588  1.00  0.00           N  
ATOM   4141  CA  SER D  69       7.786 -24.782 -38.385  1.00  0.00           C  
ATOM   4142  C   SER D  69       6.784 -24.106 -37.512  1.00  0.00           C  
ATOM   4143  O   SER D  69       6.917 -22.907 -37.313  1.00  0.00           O  
ATOM   4144  CB  SER D  69       9.045 -25.027 -37.577  1.00  0.00           C  
ATOM   4145  OG  SER D  69       8.738 -25.576 -36.324  1.00  0.00           O  
ATOM   4146  N   PRO D  70       5.854 -24.786 -36.861  1.00  0.00           N  
ATOM   4147  CA  PRO D  70       4.962 -24.213 -35.908  1.00  0.00           C  
ATOM   4148  C   PRO D  70       5.684 -23.433 -34.793  1.00  0.00           C  
ATOM   4149  O   PRO D  70       5.118 -22.555 -34.108  1.00  0.00           O  
ATOM   4150  CB  PRO D  70       4.248 -25.455 -35.365  1.00  0.00           C  
ATOM   4151  CG  PRO D  70       4.278 -26.420 -36.500  1.00  0.00           C  
ATOM   4152  CD  PRO D  70       5.620 -26.198 -37.145  1.00  0.00           C  
ATOM   4153  N   THR D  71       6.942 -23.751 -34.520  1.00  0.00           N  
ATOM   4154  CA  THR D  71       7.756 -23.097 -33.459  1.00  0.00           C  
ATOM   4155  C   THR D  71       8.649 -21.933 -33.871  1.00  0.00           C  
ATOM   4156  O   THR D  71       9.406 -21.237 -33.151  1.00  0.00           O  
ATOM   4157  CB  THR D  71       8.650 -24.144 -32.771  1.00  0.00           C  
ATOM   4158  CG2 THR D  71       7.804 -25.253 -32.164  1.00  0.00           C  
ATOM   4159  OG1 THR D  71       9.555 -24.708 -33.729  1.00  0.00           O  
ATOM   4160  N   ASP D  72       8.705 -21.661 -35.164  1.00  0.00           N  
ATOM   4161  CA  ASP D  72       9.561 -20.555 -35.760  1.00  0.00           C  
ATOM   4162  C   ASP D  72       9.137 -19.193 -35.212  1.00  0.00           C  
ATOM   4163  O   ASP D  72       9.996 -18.389 -34.877  1.00  0.00           O  
ATOM   4164  CB  ASP D  72       9.462 -20.529 -37.287  1.00  0.00           C  
ATOM   4165  CG  ASP D  72      10.259 -21.644 -37.951  1.00  0.00           C  
ATOM   4166  OD1 ASP D  72      11.135 -22.181 -37.316  1.00  0.00           O  
ATOM   4167  OD2 ASP D  72       9.985 -21.948 -39.088  1.00  0.00           O1-
ATOM   4168  N   ILE D  73       7.844 -19.072 -34.928  1.00  0.00           N  
ATOM   4169  CA  ILE D  73       7.181 -17.908 -34.333  1.00  0.00           C  
ATOM   4170  C   ILE D  73       6.659 -18.208 -32.867  1.00  0.00           C  
ATOM   4171  O   ILE D  73       5.734 -17.560 -32.363  1.00  0.00           O  
ATOM   4172  CB  ILE D  73       6.014 -17.455 -35.229  1.00  0.00           C  
ATOM   4173  CG1 ILE D  73       4.999 -18.589 -35.397  1.00  0.00           C  
ATOM   4174  CG2 ILE D  73       6.530 -16.993 -36.583  1.00  0.00           C  
ATOM   4175  CD1 ILE D  73       3.711 -18.162 -36.062  1.00  0.00           C  
ATOM   4176  N   LYS D  74       7.311 -19.169 -32.255  1.00  0.00           N  
ATOM   4177  CA  LYS D  74       6.992 -19.565 -30.857  1.00  0.00           C  
ATOM   4178  C   LYS D  74       7.057 -18.370 -29.903  1.00  0.00           C  
ATOM   4179  O   LYS D  74       8.082 -17.654 -29.872  1.00  0.00           O  
ATOM   4180  CB  LYS D  74       7.944 -20.661 -30.375  1.00  0.00           C  
ATOM   4181  CG  LYS D  74       7.638 -21.191 -28.981  1.00  0.00           C  
ATOM   4182  CD  LYS D  74       8.593 -22.310 -28.593  1.00  0.00           C  
ATOM   4183  CE  LYS D  74       8.288 -22.842 -27.200  1.00  0.00           C  
ATOM   4184  NZ  LYS D  74       9.255 -23.893 -26.782  1.00  0.00           N1+
ATOM   4185  N   GLY D  75       5.967 -18.195 -29.156  1.00  0.00           N  
ATOM   4186  CA  GLY D  75       5.815 -17.014 -28.303  1.00  0.00           C  
ATOM   4187  C   GLY D  75       6.132 -17.092 -26.805  1.00  0.00           C  
ATOM   4188  O   GLY D  75       6.841 -18.007 -26.548  1.00  0.00           O  
ATOM   4189  N   LYS D  76       5.749 -16.171 -25.903  1.00  0.00           N  
ATOM   4190  CA  LYS D  76       6.014 -16.190 -24.475  1.00  0.00           C  
ATOM   4191  C   LYS D  76       5.174 -17.282 -23.820  1.00  0.00           C  
ATOM   4192  O   LYS D  76       5.729 -18.021 -23.027  1.00  0.00           O  
ATOM   4193  CB  LYS D  76       5.715 -14.828 -23.846  1.00  0.00           C  
ATOM   4194  CG  LYS D  76       6.071 -14.726 -22.369  1.00  0.00           C  
ATOM   4195  CD  LYS D  76       5.916 -13.300 -21.861  1.00  0.00           C  
ATOM   4196  CE  LYS D  76       6.442 -13.158 -20.440  1.00  0.00           C  
ATOM   4197  NZ  LYS D  76       5.608 -13.907 -19.461  1.00  0.00           N1+
ATOM   4198  N   TYR D  77       3.947 -17.460 -24.359  1.00  0.00           N  
ATOM   4199  CA  TYR D  77       2.929 -18.337 -23.777  1.00  0.00           C  
ATOM   4200  C   TYR D  77       2.574 -19.415 -24.766  1.00  0.00           C  
ATOM   4201  O   TYR D  77       2.363 -20.565 -24.388  1.00  0.00           O  
ATOM   4202  CB  TYR D  77       1.679 -17.551 -23.376  1.00  0.00           C  
ATOM   4203  CG  TYR D  77       1.954 -16.416 -22.414  1.00  0.00           C  
ATOM   4204  CD1 TYR D  77       1.839 -15.101 -22.841  1.00  0.00           C  
ATOM   4205  CD2 TYR D  77       2.322 -16.691 -21.105  1.00  0.00           C  
ATOM   4206  CE1 TYR D  77       2.090 -14.065 -21.962  1.00  0.00           C  
ATOM   4207  CE2 TYR D  77       2.573 -15.655 -20.227  1.00  0.00           C  
ATOM   4208  CZ  TYR D  77       2.459 -14.347 -20.651  1.00  0.00           C  
ATOM   4209  OH  TYR D  77       2.709 -13.315 -19.776  1.00  0.00           O  
ATOM   4210  N   VAL D  78       2.454 -19.039 -26.083  1.00  0.00           N  
ATOM   4211  CA  VAL D  78       2.125 -19.903 -27.227  1.00  0.00           C  
ATOM   4212  C   VAL D  78       3.342 -20.788 -27.661  1.00  0.00           C  
ATOM   4213  O   VAL D  78       4.506 -20.300 -27.913  1.00  0.00           O  
ATOM   4214  CB  VAL D  78       1.665 -19.038 -28.415  1.00  0.00           C  
ATOM   4215  CG1 VAL D  78       1.381 -19.909 -29.630  1.00  0.00           C  
ATOM   4216  CG2 VAL D  78       0.432 -18.237 -28.026  1.00  0.00           C  
ATOM   4217  N   LYS D  79       3.006 -22.056 -27.789  1.00  0.00           N  
ATOM   4218  CA  LYS D  79       3.917 -23.084 -28.084  1.00  0.00           C  
ATOM   4219  C   LYS D  79       4.050 -23.300 -29.598  1.00  0.00           C  
ATOM   4220  O   LYS D  79       5.171 -23.323 -30.155  1.00  0.00           O  
ATOM   4221  CB  LYS D  79       3.476 -24.371 -27.383  1.00  0.00           C  
ATOM   4222  CG  LYS D  79       4.453 -25.530 -27.524  1.00  0.00           C  
ATOM   4223  CD  LYS D  79       3.985 -26.745 -26.737  1.00  0.00           C  
ATOM   4224  CE  LYS D  79       4.950 -27.912 -26.894  1.00  0.00           C  
ATOM   4225  NZ  LYS D  79       4.503 -29.109 -26.131  1.00  0.00           N1+
ATOM   4226  N   GLU D  80       2.924 -23.583 -30.256  1.00  0.00           N  
ATOM   4227  CA  GLU D  80       2.962 -23.887 -31.709  1.00  0.00           C  
ATOM   4228  C   GLU D  80       1.809 -23.181 -32.467  1.00  0.00           C  
ATOM   4229  O   GLU D  80       0.679 -23.289 -32.016  1.00  0.00           O  
ATOM   4230  CB  GLU D  80       2.884 -25.398 -31.938  1.00  0.00           C  
ATOM   4231  CG  GLU D  80       4.141 -26.160 -31.544  1.00  0.00           C  
ATOM   4232  CD  GLU D  80       4.021 -27.642 -31.768  1.00  0.00           C  
ATOM   4233  OE1 GLU D  80       2.946 -28.090 -32.087  1.00  0.00           O  
ATOM   4234  OE2 GLU D  80       5.006 -28.326 -31.618  1.00  0.00           O1-
ATOM   4235  N   VAL D  81       2.068 -22.658 -33.708  1.00  0.00           N  
ATOM   4236  CA  VAL D  81       0.995 -22.158 -34.522  1.00  0.00           C  
ATOM   4237  C   VAL D  81       1.146 -22.778 -35.926  1.00  0.00           C  
ATOM   4238  O   VAL D  81       2.185 -22.566 -36.574  1.00  0.00           O  
ATOM   4239  CB  VAL D  81       1.036 -20.620 -34.596  1.00  0.00           C  
ATOM   4240  CG1 VAL D  81      -0.090 -20.099 -35.476  1.00  0.00           C  
ATOM   4241  CG2 VAL D  81       0.943 -20.032 -33.196  1.00  0.00           C  
ATOM   4242  N   GLU D  82       0.094 -23.404 -36.415  1.00  0.00           N  
ATOM   4243  CA  GLU D  82       0.131 -24.212 -37.667  1.00  0.00           C  
ATOM   4244  C   GLU D  82      -1.286 -24.199 -38.425  1.00  0.00           C  
ATOM   4245  O   GLU D  82      -2.351 -24.244 -37.818  1.00  0.00           O  
ATOM   4246  CB  GLU D  82       0.548 -25.647 -37.337  1.00  0.00           C  
ATOM   4247  CG  GLU D  82       0.731 -26.544 -38.554  1.00  0.00           C  
ATOM   4248  CD  GLU D  82       1.163 -27.938 -38.193  1.00  0.00           C  
ATOM   4249  OE1 GLU D  82       1.397 -28.186 -37.035  1.00  0.00           O  
ATOM   4250  OE2 GLU D  82       1.260 -28.756 -39.077  1.00  0.00           O1-
ATOM   4251  N   VAL D  83      -1.139 -24.050 -39.761  1.00  0.00           N  
ATOM   4252  CA  VAL D  83      -2.282 -24.207 -40.705  1.00  0.00           C  
ATOM   4253  C   VAL D  83      -2.702 -25.667 -40.855  1.00  0.00           C  
ATOM   4254  O   VAL D  83      -1.860 -26.551 -41.010  1.00  0.00           O  
ATOM   4255  CB  VAL D  83      -1.916 -23.653 -42.095  1.00  0.00           C  
ATOM   4256  CG1 VAL D  83      -3.039 -23.916 -43.087  1.00  0.00           C  
ATOM   4257  CG2 VAL D  83      -1.621 -22.164 -41.997  1.00  0.00           C  
ATOM   4258  N   LYS D  84      -4.003 -25.898 -40.672  1.00  0.00           N  
ATOM   4259  CA  LYS D  84      -4.594 -27.218 -40.821  1.00  0.00           C  
ATOM   4260  C   LYS D  84      -5.705 -27.115 -41.945  1.00  0.00           C  
ATOM   4261  O   LYS D  84      -6.861 -26.777 -41.603  1.00  0.00           O  
ATOM   4262  CB  LYS D  84      -5.170 -27.706 -39.491  1.00  0.00           C  
ATOM   4263  CG  LYS D  84      -4.151 -27.811 -38.364  1.00  0.00           C  
ATOM   4264  CD  LYS D  84      -3.140 -28.916 -38.635  1.00  0.00           C  
ATOM   4265  CE  LYS D  84      -2.188 -29.095 -37.462  1.00  0.00           C  
ATOM   4266  NZ  LYS D  84      -1.178 -30.157 -37.721  1.00  0.00           N1+
ATOM   4267  N   ASN D  85      -5.386 -27.410 -43.203  1.00  0.00           N  
ATOM   4268  CA  ASN D  85      -6.247 -27.402 -44.421  1.00  0.00           C  
ATOM   4269  C   ASN D  85      -7.156 -26.147 -44.742  1.00  0.00           C  
ATOM   4270  O   ASN D  85      -8.303 -26.290 -45.162  1.00  0.00           O  
ATOM   4271  CB  ASN D  85      -7.124 -28.639 -44.367  1.00  0.00           C  
ATOM   4272  CG  ASN D  85      -6.331 -29.914 -44.445  1.00  0.00           C  
ATOM   4273  ND2 ASN D  85      -6.756 -30.913 -43.714  1.00  0.00           N  
ATOM   4274  OD1 ASN D  85      -5.332 -29.995 -45.169  1.00  0.00           O  
ATOM   4275  N   GLY D  86      -6.575 -24.932 -44.471  1.00  0.00           N  
ATOM   4276  CA  GLY D  86      -7.169 -23.621 -44.518  1.00  0.00           C  
ATOM   4277  C   GLY D  86      -7.598 -22.982 -43.178  1.00  0.00           C  
ATOM   4278  O   GLY D  86      -8.008 -21.838 -43.226  1.00  0.00           O  
ATOM   4279  N   VAL D  87      -7.484 -23.694 -42.011  1.00  0.00           N  
ATOM   4280  CA  VAL D  87      -7.766 -23.190 -40.665  1.00  0.00           C  
ATOM   4281  C   VAL D  87      -6.494 -23.089 -39.846  1.00  0.00           C  
ATOM   4282  O   VAL D  87      -5.850 -24.099 -39.571  1.00  0.00           O  
ATOM   4283  CB  VAL D  87      -8.764 -24.112 -39.940  1.00  0.00           C  
ATOM   4284  CG1 VAL D  87      -9.027 -23.608 -38.529  1.00  0.00           C  
ATOM   4285  CG2 VAL D  87     -10.059 -24.199 -40.733  1.00  0.00           C  
ATOM   4286  N   VAL D  88      -6.159 -21.871 -39.361  1.00  0.00           N  
ATOM   4287  CA  VAL D  88      -4.948 -21.522 -38.531  1.00  0.00           C  
ATOM   4288  C   VAL D  88      -5.155 -21.792 -37.043  1.00  0.00           C  
ATOM   4289  O   VAL D  88      -5.993 -21.232 -36.441  1.00  0.00           O  
ATOM   4290  CB  VAL D  88      -4.582 -20.036 -38.705  1.00  0.00           C  
ATOM   4291  CG1 VAL D  88      -3.384 -19.678 -37.837  1.00  0.00           C  
ATOM   4292  CG2 VAL D  88      -4.294 -19.742 -40.169  1.00  0.00           C  
ATOM   4293  N   THR D  89      -4.481 -22.785 -36.517  1.00  0.00           N  
ATOM   4294  CA  THR D  89      -4.593 -23.247 -35.163  1.00  0.00           C  
ATOM   4295  C   THR D  89      -3.457 -22.715 -34.352  1.00  0.00           C  
ATOM   4296  O   THR D  89      -2.352 -22.477 -34.884  1.00  0.00           O  
ATOM   4297  CB  THR D  89      -4.615 -24.785 -35.089  1.00  0.00           C  
ATOM   4298  CG2 THR D  89      -5.744 -25.343 -35.941  1.00  0.00           C  
ATOM   4299  OG1 THR D  89      -3.365 -25.307 -35.557  1.00  0.00           O  
ATOM   4300  N   ALA D  90      -3.595 -22.637 -33.024  1.00  0.00           N  
ATOM   4301  CA  ALA D  90      -2.630 -22.174 -32.051  1.00  0.00           C  
ATOM   4302  C   ALA D  90      -2.711 -23.012 -30.753  1.00  0.00           C  
ATOM   4303  O   ALA D  90      -3.762 -23.159 -30.195  1.00  0.00           O  
ATOM   4304  CB  ALA D  90      -2.781 -20.606 -31.942  1.00  0.00           C  
ATOM   4305  N   THR D  91      -1.593 -23.612 -30.339  1.00  0.00           N  
ATOM   4306  CA  THR D  91      -1.509 -24.429 -29.083  1.00  0.00           C  
ATOM   4307  C   THR D  91      -0.580 -23.704 -27.997  1.00  0.00           C  
ATOM   4308  O   THR D  91       0.600 -23.341 -28.289  1.00  0.00           O  
ATOM   4309  CB  THR D  91      -0.974 -25.841 -29.386  1.00  0.00           C  
ATOM   4310  CG2 THR D  91      -0.857 -26.653 -28.105  1.00  0.00           C  
ATOM   4311  OG1 THR D  91      -1.863 -26.508 -30.291  1.00  0.00           O  
ATOM   4312  N   MET D  92      -0.989 -23.655 -26.739  1.00  0.00           N  
ATOM   4313  CA  MET D  92      -0.262 -23.027 -25.605  1.00  0.00           C  
ATOM   4314  C   MET D  92       0.825 -23.930 -24.864  1.00  0.00           C  
ATOM   4315  O   MET D  92       0.910 -25.113 -24.974  1.00  0.00           O  
ATOM   4316  CB  MET D  92      -1.299 -22.537 -24.596  1.00  0.00           C  
ATOM   4317  CG  MET D  92      -2.389 -21.658 -25.192  1.00  0.00           C  
ATOM   4318  SD  MET D  92      -1.734 -20.171 -25.976  1.00  0.00           S  
ATOM   4319  CE  MET D  92      -1.184 -19.248 -24.544  1.00  0.00           C  
ATOM   4320  N   LEU D  93       1.825 -23.358 -24.141  1.00  0.00           N  
ATOM   4321  CA  LEU D  93       2.807 -24.085 -23.324  1.00  0.00           C  
ATOM   4322  C   LEU D  93       2.121 -24.797 -22.109  1.00  0.00           C  
ATOM   4323  O   LEU D  93       1.102 -24.334 -21.529  1.00  0.00           O  
ATOM   4324  CB  LEU D  93       3.886 -23.115 -22.826  1.00  0.00           C  
ATOM   4325  CG  LEU D  93       4.810 -22.537 -23.905  1.00  0.00           C  
ATOM   4326  CD1 LEU D  93       5.671 -21.435 -23.301  1.00  0.00           C  
ATOM   4327  CD2 LEU D  93       5.672 -23.648 -24.485  1.00  0.00           C  
ATOM   4328  N   SER D  94       2.643 -25.953 -21.758  1.00  0.00           N  
ATOM   4329  CA  SER D  94       2.098 -26.782 -20.618  1.00  0.00           C  
ATOM   4330  C   SER D  94       2.334 -26.273 -19.226  1.00  0.00           C  
ATOM   4331  O   SER D  94       1.781 -26.815 -18.236  1.00  0.00           O  
ATOM   4332  CB  SER D  94       2.674 -28.183 -20.683  1.00  0.00           C  
ATOM   4333  OG  SER D  94       4.052 -28.171 -20.429  1.00  0.00           O  
ATOM   4334  N   SER D  95       3.138 -25.262 -19.046  1.00  0.00           N  
ATOM   4335  CA  SER D  95       3.494 -24.599 -17.807  1.00  0.00           C  
ATOM   4336  C   SER D  95       3.546 -23.066 -17.713  1.00  0.00           C  
ATOM   4337  O   SER D  95       4.040 -22.450 -18.620  1.00  0.00           O  
ATOM   4338  CB  SER D  95       4.852 -25.134 -17.398  1.00  0.00           C  
ATOM   4339  OG  SER D  95       5.312 -24.501 -16.235  1.00  0.00           O  
ATOM   4340  N   GLY D  96       2.769 -22.469 -16.768  1.00  0.00           N  
ATOM   4341  CA  GLY D  96       2.606 -21.012 -16.521  1.00  0.00           C  
ATOM   4342  C   GLY D  96       1.441 -20.352 -17.256  1.00  0.00           C  
ATOM   4343  O   GLY D  96       1.086 -19.267 -16.881  1.00  0.00           O  
ATOM   4344  N   VAL D  97       0.883 -20.973 -18.251  1.00  0.00           N  
ATOM   4345  CA  VAL D  97      -0.226 -20.375 -19.026  1.00  0.00           C  
ATOM   4346  C   VAL D  97      -1.536 -20.540 -18.204  1.00  0.00           C  
ATOM   4347  O   VAL D  97      -2.232 -21.511 -18.504  1.00  0.00           O  
ATOM   4348  CB  VAL D  97      -0.371 -21.057 -20.400  1.00  0.00           C  
ATOM   4349  CG1 VAL D  97      -1.510 -20.429 -21.189  1.00  0.00           C  
ATOM   4350  CG2 VAL D  97       0.938 -20.956 -21.168  1.00  0.00           C  
ATOM   4351  N   ASN D  98      -1.711 -19.693 -17.168  1.00  0.00           N  
ATOM   4352  CA  ASN D  98      -2.801 -19.527 -16.311  1.00  0.00           C  
ATOM   4353  C   ASN D  98      -2.779 -20.608 -15.204  1.00  0.00           C  
ATOM   4354  O   ASN D  98      -1.864 -20.701 -14.380  1.00  0.00           O  
ATOM   4355  CB  ASN D  98      -4.089 -19.556 -17.114  1.00  0.00           C  
ATOM   4356  CG  ASN D  98      -5.297 -19.230 -16.282  1.00  0.00           C  
ATOM   4357  ND2 ASN D  98      -5.542 -17.961 -16.080  1.00  0.00           N  
ATOM   4358  OD1 ASN D  98      -6.010 -20.129 -15.821  1.00  0.00           O  
ATOM   4359  N   ASN D  99      -3.756 -21.500 -15.243  1.00  0.00           N  
ATOM   4360  CA  ASN D  99      -4.186 -22.599 -14.326  1.00  0.00           C  
ATOM   4361  C   ASN D  99      -5.121 -23.651 -15.020  1.00  0.00           C  
ATOM   4362  O   ASN D  99      -4.799 -24.839 -14.929  1.00  0.00           O  
ATOM   4363  CB  ASN D  99      -4.870 -22.015 -13.103  1.00  0.00           C  
ATOM   4364  CG  ASN D  99      -5.238 -23.064 -12.090  1.00  0.00           C  
ATOM   4365  ND2 ASN D  99      -6.502 -23.141 -11.763  1.00  0.00           N  
ATOM   4366  OD1 ASN D  99      -4.375 -23.804 -11.604  1.00  0.00           O  
ATOM   4367  N   GLU D 100      -6.251 -23.191 -15.634  1.00  0.00           N  
ATOM   4368  CA  GLU D 100      -7.252 -24.001 -16.362  1.00  0.00           C  
ATOM   4369  C   GLU D 100      -6.952 -24.245 -17.811  1.00  0.00           C  
ATOM   4370  O   GLU D 100      -7.369 -25.257 -18.401  1.00  0.00           O  
ATOM   4371  CB  GLU D 100      -8.628 -23.339 -16.267  1.00  0.00           C  
ATOM   4372  CG  GLU D 100      -9.239 -23.355 -14.873  1.00  0.00           C  
ATOM   4373  CD  GLU D 100     -10.591 -22.700 -14.819  1.00  0.00           C  
ATOM   4374  OE1 GLU D 100     -10.690 -21.554 -15.189  1.00  0.00           O  
ATOM   4375  OE2 GLU D 100     -11.527 -23.346 -14.408  1.00  0.00           O1-
ATOM   4376  N   ILE D 101      -6.146 -23.375 -18.476  1.00  0.00           N  
ATOM   4377  CA  ILE D 101      -5.835 -23.443 -19.954  1.00  0.00           C  
ATOM   4378  C   ILE D 101      -4.320 -23.774 -20.245  1.00  0.00           C  
ATOM   4379  O   ILE D 101      -3.896 -23.586 -21.365  1.00  0.00           O  
ATOM   4380  CB  ILE D 101      -6.203 -22.117 -20.643  1.00  0.00           C  
ATOM   4381  CG1 ILE D 101      -5.415 -20.958 -20.027  1.00  0.00           C  
ATOM   4382  CG2 ILE D 101      -7.699 -21.861 -20.541  1.00  0.00           C  
ATOM   4383  CD1 ILE D 101      -5.531 -19.662 -20.797  1.00  0.00           C  
ATOM   4384  N   LYS D 102      -3.541 -24.357 -19.356  1.00  0.00           N  
ATOM   4385  CA  LYS D 102      -2.165 -24.765 -19.674  1.00  0.00           C  
ATOM   4386  C   LYS D 102      -2.111 -25.847 -20.721  1.00  0.00           C  
ATOM   4387  O   LYS D 102      -2.815 -26.793 -20.616  1.00  0.00           O  
ATOM   4388  CB  LYS D 102      -1.443 -25.243 -18.414  1.00  0.00           C  
ATOM   4389  CG  LYS D 102      -1.192 -24.153 -17.381  1.00  0.00           C  
ATOM   4390  CD  LYS D 102      -0.475 -24.705 -16.158  1.00  0.00           C  
ATOM   4391  CE  LYS D 102      -0.287 -23.633 -15.095  1.00  0.00           C  
ATOM   4392  NZ  LYS D 102       0.373 -24.169 -13.874  1.00  0.00           N1+
ATOM   4393  N   GLY D 103      -1.352 -25.679 -21.834  1.00  0.00           N  
ATOM   4394  CA  GLY D 103      -1.279 -26.648 -22.921  1.00  0.00           C  
ATOM   4395  C   GLY D 103      -2.437 -26.763 -23.862  1.00  0.00           C  
ATOM   4396  O   GLY D 103      -2.413 -27.614 -24.740  1.00  0.00           O  
ATOM   4397  N   LYS D 104      -3.430 -25.848 -23.802  1.00  0.00           N  
ATOM   4398  CA  LYS D 104      -4.649 -25.866 -24.583  1.00  0.00           C  
ATOM   4399  C   LYS D 104      -4.597 -25.093 -25.979  1.00  0.00           C  
ATOM   4400  O   LYS D 104      -3.602 -24.424 -26.287  1.00  0.00           O  
ATOM   4401  CB  LYS D 104      -5.770 -25.303 -23.708  1.00  0.00           C  
ATOM   4402  CG  LYS D 104      -5.934 -26.005 -22.367  1.00  0.00           C  
ATOM   4403  CD  LYS D 104      -6.263 -27.479 -22.551  1.00  0.00           C  
ATOM   4404  CE  LYS D 104      -6.469 -28.172 -21.212  1.00  0.00           C  
ATOM   4405  NZ  LYS D 104      -6.634 -29.643 -21.367  1.00  0.00           N1+
ATOM   4406  N   LYS D 105      -5.684 -25.205 -26.817  1.00  0.00           N  
ATOM   4407  CA  LYS D 105      -5.727 -24.681 -28.203  1.00  0.00           C  
ATOM   4408  C   LYS D 105      -7.005 -23.926 -28.589  1.00  0.00           C  
ATOM   4409  O   LYS D 105      -8.056 -23.929 -27.905  1.00  0.00           O  
ATOM   4410  CB  LYS D 105      -5.519 -25.831 -29.189  1.00  0.00           C  
ATOM   4411  CG  LYS D 105      -6.536 -26.959 -29.063  1.00  0.00           C  
ATOM   4412  CD  LYS D 105      -6.198 -28.113 -29.995  1.00  0.00           C  
ATOM   4413  CE  LYS D 105      -7.164 -29.274 -29.811  1.00  0.00           C  
ATOM   4414  NZ  LYS D 105      -6.785 -30.450 -30.640  1.00  0.00           N1+
ATOM   4415  N   LEU D 106      -6.883 -23.068 -29.630  1.00  0.00           N  
ATOM   4416  CA  LEU D 106      -7.835 -22.212 -30.374  1.00  0.00           C  
ATOM   4417  C   LEU D 106      -7.596 -22.400 -31.911  1.00  0.00           C  
ATOM   4418  O   LEU D 106      -6.523 -22.979 -32.274  1.00  0.00           O  
ATOM   4419  CB  LEU D 106      -7.659 -20.741 -29.978  1.00  0.00           C  
ATOM   4420  CG  LEU D 106      -7.912 -20.415 -28.500  1.00  0.00           C  
ATOM   4421  CD1 LEU D 106      -7.494 -18.978 -28.218  1.00  0.00           C  
ATOM   4422  CD2 LEU D 106      -9.384 -20.630 -28.178  1.00  0.00           C  
ATOM   4423  N   SER D 107      -8.454 -21.855 -32.803  1.00  0.00           N  
ATOM   4424  CA  SER D 107      -8.373 -21.832 -34.293  1.00  0.00           C  
ATOM   4425  C   SER D 107      -9.011 -20.549 -34.876  1.00  0.00           C  
ATOM   4426  O   SER D 107      -9.760 -19.791 -34.195  1.00  0.00           O  
ATOM   4427  CB  SER D 107      -9.062 -23.052 -34.874  1.00  0.00           C  
ATOM   4428  OG  SER D 107     -10.455 -22.935 -34.778  1.00  0.00           O  
ATOM   4429  N   LEU D 108      -8.628 -20.288 -36.135  1.00  0.00           N  
ATOM   4430  CA  LEU D 108      -8.929 -19.177 -37.010  1.00  0.00           C  
ATOM   4431  C   LEU D 108      -9.311 -19.717 -38.409  1.00  0.00           C  
ATOM   4432  O   LEU D 108      -8.473 -20.322 -39.114  1.00  0.00           O  
ATOM   4433  CB  LEU D 108      -7.724 -18.233 -37.104  1.00  0.00           C  
ATOM   4434  CG  LEU D 108      -7.812 -17.146 -38.182  1.00  0.00           C  
ATOM   4435  CD1 LEU D 108      -8.958 -16.197 -37.854  1.00  0.00           C  
ATOM   4436  CD2 LEU D 108      -6.489 -16.399 -38.260  1.00  0.00           C  
ATOM   4437  N   TRP D 109     -10.508 -19.294 -38.868  1.00  0.00           N  
ATOM   4438  CA  TRP D 109     -11.098 -19.790 -40.131  1.00  0.00           C  
ATOM   4439  C   TRP D 109     -11.865 -18.677 -40.839  1.00  0.00           C  
ATOM   4440  O   TRP D 109     -11.911 -17.531 -40.393  1.00  0.00           O  
ATOM   4441  CB  TRP D 109     -12.038 -20.968 -39.868  1.00  0.00           C  
ATOM   4442  CG  TRP D 109     -13.230 -20.608 -39.034  1.00  0.00           C  
ATOM   4443  CD1 TRP D 109     -14.478 -20.300 -39.487  1.00  0.00           C  
ATOM   4444  CD2 TRP D 109     -13.293 -20.518 -37.590  1.00  0.00           C  
ATOM   4445  CE2 TRP D 109     -14.602 -20.154 -37.262  1.00  0.00           C  
ATOM   4446  CE3 TRP D 109     -12.359 -20.714 -36.566  1.00  0.00           C  
ATOM   4447  NE1 TRP D 109     -15.310 -20.024 -38.430  1.00  0.00           N  
ATOM   4448  CZ2 TRP D 109     -15.006 -19.978 -35.948  1.00  0.00           C  
ATOM   4449  CZ3 TRP D 109     -12.765 -20.539 -35.249  1.00  0.00           C  
ATOM   4450  CH2 TRP D 109     -14.055 -20.181 -34.948  1.00  0.00           C  
ATOM   4451  N   ALA D 110     -12.477 -19.038 -41.986  1.00  0.00           N  
ATOM   4452  CA  ALA D 110     -13.075 -18.065 -42.862  1.00  0.00           C  
ATOM   4453  C   ALA D 110     -14.069 -18.618 -43.906  1.00  0.00           C  
ATOM   4454  O   ALA D 110     -14.200 -19.834 -44.037  1.00  0.00           O  
ATOM   4455  CB  ALA D 110     -11.908 -17.257 -43.593  1.00  0.00           C  
ATOM   4456  N   ARG D 111     -14.813 -17.714 -44.588  1.00  0.00           N  
ATOM   4457  CA  ARG D 111     -15.725 -17.958 -45.680  1.00  0.00           C  
ATOM   4458  C   ARG D 111     -15.144 -17.214 -46.959  1.00  0.00           C  
ATOM   4459  O   ARG D 111     -14.352 -16.257 -46.824  1.00  0.00           O  
ATOM   4460  CB  ARG D 111     -17.120 -17.459 -45.335  1.00  0.00           C  
ATOM   4461  CG  ARG D 111     -17.722 -18.063 -44.076  1.00  0.00           C  
ATOM   4462  CD  ARG D 111     -18.302 -19.406 -44.334  1.00  0.00           C  
ATOM   4463  NE  ARG D 111     -18.943 -19.956 -43.150  1.00  0.00           N  
ATOM   4464  CZ  ARG D 111     -19.526 -21.169 -43.090  1.00  0.00           C  
ATOM   4465  NH1 ARG D 111     -19.540 -21.945 -44.152  1.00  0.00           N1+
ATOM   4466  NH2 ARG D 111     -20.084 -21.579 -41.965  1.00  0.00           N  
ATOM   4467  N   ARG D 112     -15.464 -17.780 -48.080  1.00  0.00           N  
ATOM   4468  CA  ARG D 112     -15.094 -17.334 -49.458  1.00  0.00           C  
ATOM   4469  C   ARG D 112     -15.937 -16.142 -49.926  1.00  0.00           C  
ATOM   4470  O   ARG D 112     -17.120 -16.404 -50.081  1.00  0.00           O  
ATOM   4471  CB  ARG D 112     -15.262 -18.471 -50.455  1.00  0.00           C  
ATOM   4472  CG  ARG D 112     -14.705 -18.192 -51.842  1.00  0.00           C  
ATOM   4473  CD  ARG D 112     -15.062 -19.267 -52.804  1.00  0.00           C  
ATOM   4474  NE  ARG D 112     -14.391 -19.096 -54.082  1.00  0.00           N  
ATOM   4475  CZ  ARG D 112     -13.291 -19.773 -54.466  1.00  0.00           C  
ATOM   4476  NH1 ARG D 112     -12.752 -20.661 -53.660  1.00  0.00           N1+
ATOM   4477  NH2 ARG D 112     -12.754 -19.545 -55.652  1.00  0.00           N  
ATOM   4478  N   GLU D 113     -15.337 -15.010 -50.167  1.00  0.00           N  
ATOM   4479  CA  GLU D 113     -16.110 -13.764 -50.623  1.00  0.00           C  
ATOM   4480  C   GLU D 113     -15.930 -13.544 -52.137  1.00  0.00           C  
ATOM   4481  O   GLU D 113     -16.521 -12.658 -52.712  1.00  0.00           O  
ATOM   4482  CB  GLU D 113     -15.646 -12.512 -49.874  1.00  0.00           C  
ATOM   4483  CG  GLU D 113     -15.866 -12.562 -48.369  1.00  0.00           C  
ATOM   4484  CD  GLU D 113     -17.319 -12.626 -47.991  1.00  0.00           C  
ATOM   4485  OE1 GLU D 113     -18.110 -11.976 -48.633  1.00  0.00           O  
ATOM   4486  OE2 GLU D 113     -17.640 -13.326 -47.060  1.00  0.00           O1-
ATOM   4487  N   ASN D 114     -15.222 -14.401 -52.863  1.00  0.00           N  
ATOM   4488  CA  ASN D 114     -14.911 -14.296 -54.351  1.00  0.00           C  
ATOM   4489  C   ASN D 114     -14.318 -12.953 -54.806  1.00  0.00           C  
ATOM   4490  O   ASN D 114     -14.936 -12.301 -55.607  1.00  0.00           O  
ATOM   4491  CB  ASN D 114     -16.157 -14.579 -55.169  1.00  0.00           C  
ATOM   4492  CG  ASN D 114     -16.584 -16.019 -55.093  1.00  0.00           C  
ATOM   4493  ND2 ASN D 114     -17.873 -16.245 -55.060  1.00  0.00           N  
ATOM   4494  OD1 ASN D 114     -15.745 -16.927 -55.065  1.00  0.00           O  
ATOM   4495  N   GLY D 115     -13.299 -12.521 -54.057  1.00  0.00           N  
ATOM   4496  CA  GLY D 115     -12.633 -11.270 -54.225  1.00  0.00           C  
ATOM   4497  C   GLY D 115     -11.686 -11.052 -53.057  1.00  0.00           C  
ATOM   4498  O   GLY D 115     -10.569 -10.633 -53.171  1.00  0.00           O  
ATOM   4499  N   SER D 116     -12.049 -11.470 -51.777  1.00  0.00           N  
ATOM   4500  CA  SER D 116     -11.316 -11.452 -50.526  1.00  0.00           C  
ATOM   4501  C   SER D 116     -11.832 -12.609 -49.695  1.00  0.00           C  
ATOM   4502  O   SER D 116     -12.478 -13.547 -50.186  1.00  0.00           O  
ATOM   4503  CB  SER D 116     -11.502 -10.137 -49.796  1.00  0.00           C  
ATOM   4504  OG  SER D 116     -10.655 -10.056 -48.683  1.00  0.00           O  
ATOM   4505  N   VAL D 117     -11.388 -12.668 -48.430  1.00  0.00           N  
ATOM   4506  CA  VAL D 117     -11.752 -13.752 -47.503  1.00  0.00           C  
ATOM   4507  C   VAL D 117     -12.182 -13.192 -46.075  1.00  0.00           C  
ATOM   4508  O   VAL D 117     -11.434 -12.434 -45.511  1.00  0.00           O  
ATOM   4509  CB  VAL D 117     -10.560 -14.717 -47.353  1.00  0.00           C  
ATOM   4510  CG1 VAL D 117     -10.869 -15.787 -46.317  1.00  0.00           C  
ATOM   4511  CG2 VAL D 117     -10.231 -15.346 -48.698  1.00  0.00           C  
ATOM   4512  N   LYS D 118     -13.306 -13.675 -45.560  1.00  0.00           N  
ATOM   4513  CA  LYS D 118     -13.967 -13.218 -44.323  1.00  0.00           C  
ATOM   4514  C   LYS D 118     -13.551 -14.084 -43.134  1.00  0.00           C  
ATOM   4515  O   LYS D 118     -14.040 -15.228 -43.066  1.00  0.00           O  
ATOM   4516  CB  LYS D 118     -15.488 -13.239 -44.481  1.00  0.00           C  
ATOM   4517  CG  LYS D 118     -16.251 -12.648 -43.303  1.00  0.00           C  
ATOM   4518  CD  LYS D 118     -17.751 -12.658 -43.555  1.00  0.00           C  
ATOM   4519  CE  LYS D 118     -18.507 -11.964 -42.432  1.00  0.00           C  
ATOM   4520  NZ  LYS D 118     -19.978 -11.979 -42.657  1.00  0.00           N1+
ATOM   4521  N   TRP D 119     -12.648 -13.561 -42.299  1.00  0.00           N  
ATOM   4522  CA  TRP D 119     -12.086 -14.380 -41.179  1.00  0.00           C  
ATOM   4523  C   TRP D 119     -12.777 -14.314 -39.795  1.00  0.00           C  
ATOM   4524  O   TRP D 119     -13.360 -13.265 -39.480  1.00  0.00           O  
ATOM   4525  CB  TRP D 119     -10.620 -13.991 -40.980  1.00  0.00           C  
ATOM   4526  CG  TRP D 119      -9.728 -14.429 -42.102  1.00  0.00           C  
ATOM   4527  CD1 TRP D 119      -9.390 -13.703 -43.205  1.00  0.00           C  
ATOM   4528  CD2 TRP D 119      -9.050 -15.702 -42.236  1.00  0.00           C  
ATOM   4529  CE2 TRP D 119      -8.334 -15.658 -43.436  1.00  0.00           C  
ATOM   4530  CE3 TRP D 119      -8.995 -16.857 -41.446  1.00  0.00           C  
ATOM   4531  NE1 TRP D 119      -8.554 -14.433 -44.014  1.00  0.00           N  
ATOM   4532  CZ2 TRP D 119      -7.568 -16.728 -43.872  1.00  0.00           C  
ATOM   4533  CZ3 TRP D 119      -8.225 -17.928 -41.883  1.00  0.00           C  
ATOM   4534  CH2 TRP D 119      -7.530 -17.865 -43.064  1.00  0.00           C  
ATOM   4535  N   PHE D 120     -12.789 -15.426 -39.073  1.00  0.00           N  
ATOM   4536  CA  PHE D 120     -13.452 -15.574 -37.721  1.00  0.00           C  
ATOM   4537  C   PHE D 120     -12.545 -16.144 -36.599  1.00  0.00           C  
ATOM   4538  O   PHE D 120     -11.793 -17.067 -36.831  1.00  0.00           O  
ATOM   4539  CB  PHE D 120     -14.682 -16.475 -37.845  1.00  0.00           C  
ATOM   4540  CG  PHE D 120     -15.672 -16.010 -38.874  1.00  0.00           C  
ATOM   4541  CD1 PHE D 120     -15.621 -16.491 -40.174  1.00  0.00           C  
ATOM   4542  CD2 PHE D 120     -16.657 -15.090 -38.546  1.00  0.00           C  
ATOM   4543  CE1 PHE D 120     -16.531 -16.063 -41.122  1.00  0.00           C  
ATOM   4544  CE2 PHE D 120     -17.568 -14.662 -39.491  1.00  0.00           C  
ATOM   4545  CZ  PHE D 120     -17.505 -15.149 -40.781  1.00  0.00           C  
ATOM   4546  N   CYS D 121     -12.577 -15.638 -35.408  1.00  0.00           N  
ATOM   4547  CA  CYS D 121     -11.611 -15.933 -34.281  1.00  0.00           C  
ATOM   4548  C   CYS D 121     -12.291 -16.656 -33.095  1.00  0.00           C  
ATOM   4549  O   CYS D 121     -13.135 -16.048 -32.468  1.00  0.00           O  
ATOM   4550  CB  CYS D 121     -10.975 -14.644 -33.761  1.00  0.00           C  
ATOM   4551  SG  CYS D 121      -9.992 -13.756 -34.993  1.00  0.00           S  
ATOM   4552  N   GLY D 122     -12.032 -17.963 -32.756  1.00  0.00           N  
ATOM   4553  CA  GLY D 122     -12.650 -18.681 -31.685  1.00  0.00           C  
ATOM   4554  C   GLY D 122     -12.012 -19.998 -31.287  1.00  0.00           C  
ATOM   4555  O   GLY D 122     -10.775 -20.158 -31.207  1.00  0.00           O  
ATOM   4556  N   GLN D 123     -12.835 -20.967 -31.004  1.00  0.00           N  
ATOM   4557  CA  GLN D 123     -12.407 -22.265 -30.503  1.00  0.00           C  
ATOM   4558  C   GLN D 123     -11.900 -23.150 -31.691  1.00  0.00           C  
ATOM   4559  O   GLN D 123     -12.176 -22.837 -32.843  1.00  0.00           O  
ATOM   4560  CB  GLN D 123     -13.556 -22.951 -29.760  1.00  0.00           C  
ATOM   4561  CG  GLN D 123     -13.945 -22.276 -28.456  1.00  0.00           C  
ATOM   4562  CD  GLN D 123     -15.007 -23.049 -27.698  1.00  0.00           C  
ATOM   4563  NE2 GLN D 123     -14.707 -23.400 -26.453  1.00  0.00           N  
ATOM   4564  OE1 GLN D 123     -16.087 -23.328 -28.226  1.00  0.00           O  
ATOM   4565  N   PRO D 124     -11.282 -24.256 -31.385  1.00  0.00           N  
ATOM   4566  CA  PRO D 124     -10.751 -25.195 -32.416  1.00  0.00           C  
ATOM   4567  C   PRO D 124     -11.790 -25.764 -33.359  1.00  0.00           C  
ATOM   4568  O   PRO D 124     -12.656 -26.493 -32.896  1.00  0.00           O  
ATOM   4569  CB  PRO D 124     -10.135 -26.311 -31.567  1.00  0.00           C  
ATOM   4570  CG  PRO D 124      -9.737 -25.631 -30.301  1.00  0.00           C  
ATOM   4571  CD  PRO D 124     -10.855 -24.660 -30.031  1.00  0.00           C  
ATOM   4572  N   VAL D 125     -11.671 -25.509 -34.672  1.00  0.00           N  
ATOM   4573  CA  VAL D 125     -12.386 -26.206 -35.694  1.00  0.00           C  
ATOM   4574  C   VAL D 125     -11.497 -26.786 -36.789  1.00  0.00           C  
ATOM   4575  O   VAL D 125     -10.306 -26.425 -36.925  1.00  0.00           O  
ATOM   4576  CB  VAL D 125     -13.412 -25.249 -36.331  1.00  0.00           C  
ATOM   4577  CG1 VAL D 125     -14.370 -24.717 -35.275  1.00  0.00           C  
ATOM   4578  CG2 VAL D 125     -12.690 -24.106 -37.029  1.00  0.00           C  
ATOM   4579  N   THR D 126     -12.032 -27.663 -37.601  1.00  0.00           N  
ATOM   4580  CA  THR D 126     -11.488 -28.322 -38.743  1.00  0.00           C  
ATOM   4581  C   THR D 126     -12.269 -27.866 -40.095  1.00  0.00           C  
ATOM   4582  O   THR D 126     -13.420 -27.536 -39.993  1.00  0.00           O  
ATOM   4583  CB  THR D 126     -11.556 -29.846 -38.533  1.00  0.00           C  
ATOM   4584  CG2 THR D 126     -10.749 -30.252 -37.309  1.00  0.00           C  
ATOM   4585  OG1 THR D 126     -12.921 -30.246 -38.355  1.00  0.00           O  
ATOM   4586  N   ARG D 127     -11.542 -27.894 -41.272  1.00  0.00           N  
ATOM   4587  CA  ARG D 127     -12.158 -27.474 -42.563  1.00  0.00           C  
ATOM   4588  C   ARG D 127     -12.856 -28.590 -43.342  1.00  0.00           C  
ATOM   4589  O   ARG D 127     -12.214 -29.417 -43.924  1.00  0.00           O  
ATOM   4590  CB  ARG D 127     -11.099 -26.862 -43.467  1.00  0.00           C  
ATOM   4591  CG  ARG D 127     -11.630 -26.264 -44.761  1.00  0.00           C  
ATOM   4592  CD  ARG D 127     -12.345 -24.985 -44.521  1.00  0.00           C  
ATOM   4593  NE  ARG D 127     -11.434 -23.915 -44.149  1.00  0.00           N  
ATOM   4594  CZ  ARG D 127     -11.806 -22.645 -43.899  1.00  0.00           C  
ATOM   4595  NH1 ARG D 127     -13.072 -22.302 -43.986  1.00  0.00           N1+
ATOM   4596  NH2 ARG D 127     -10.899 -21.743 -43.567  1.00  0.00           N  
ATOM   4597  N   THR D 128     -14.145 -28.585 -43.432  1.00  0.00           N  
ATOM   4598  CA  THR D 128     -14.877 -29.630 -44.162  1.00  0.00           C  
ATOM   4599  C   THR D 128     -14.890 -29.518 -45.637  1.00  0.00           C  
ATOM   4600  O   THR D 128     -14.584 -30.448 -46.380  1.00  0.00           O  
ATOM   4601  CB  THR D 128     -16.343 -29.689 -43.694  1.00  0.00           C  
ATOM   4602  CG2 THR D 128     -17.110 -30.745 -44.475  1.00  0.00           C  
ATOM   4603  OG1 THR D 128     -16.389 -30.005 -42.297  1.00  0.00           O  
ATOM   4604  N   ASP D 129     -15.178 -28.275 -46.088  1.00  0.00           N  
ATOM   4605  CA  ASP D 129     -15.160 -27.951 -47.532  1.00  0.00           C  
ATOM   4606  C   ASP D 129     -14.670 -26.477 -47.791  1.00  0.00           C  
ATOM   4607  O   ASP D 129     -14.192 -25.743 -46.906  1.00  0.00           O  
ATOM   4608  CB  ASP D 129     -16.554 -28.152 -48.131  1.00  0.00           C  
ATOM   4609  CG  ASP D 129     -17.588 -27.191 -47.561  1.00  0.00           C  
ATOM   4610  OD1 ASP D 129     -17.231 -26.078 -47.255  1.00  0.00           O  
ATOM   4611  OD2 ASP D 129     -18.725 -27.579 -47.438  1.00  0.00           O1-
ATOM   4612  N   ASP D 130     -14.843 -25.994 -49.051  1.00  0.00           N  
ATOM   4613  CA  ASP D 130     -14.413 -24.671 -49.506  1.00  0.00           C  
ATOM   4614  C   ASP D 130     -14.911 -23.463 -48.630  1.00  0.00           C  
ATOM   4615  O   ASP D 130     -14.253 -22.430 -48.691  1.00  0.00           O  
ATOM   4616  CB  ASP D 130     -14.878 -24.476 -50.951  1.00  0.00           C  
ATOM   4617  CG  ASP D 130     -14.105 -25.334 -51.944  1.00  0.00           C  
ATOM   4618  OD1 ASP D 130     -13.124 -25.921 -51.553  1.00  0.00           O  
ATOM   4619  OD2 ASP D 130     -14.504 -25.395 -53.082  1.00  0.00           O1-
ATOM   4620  N   ASP D 131     -15.979 -23.591 -47.822  1.00  0.00           N  
ATOM   4621  CA  ASP D 131     -16.487 -22.557 -46.918  1.00  0.00           C  
ATOM   4622  C   ASP D 131     -16.749 -23.021 -45.451  1.00  0.00           C  
ATOM   4623  O   ASP D 131     -16.475 -22.284 -44.492  1.00  0.00           O  
ATOM   4624  CB  ASP D 131     -17.781 -21.983 -47.501  1.00  0.00           C  
ATOM   4625  CG  ASP D 131     -17.548 -21.158 -48.760  1.00  0.00           C  
ATOM   4626  OD1 ASP D 131     -16.859 -20.169 -48.679  1.00  0.00           O  
ATOM   4627  OD2 ASP D 131     -18.062 -21.524 -49.790  1.00  0.00           O1-
ATOM   4628  N   THR D 132     -17.172 -24.261 -45.253  1.00  0.00           N  
ATOM   4629  CA  THR D 132     -17.609 -24.825 -43.928  1.00  0.00           C  
ATOM   4630  C   THR D 132     -16.611 -25.569 -43.073  1.00  0.00           C  
ATOM   4631  O   THR D 132     -15.993 -26.508 -43.555  1.00  0.00           O  
ATOM   4632  CB  THR D 132     -18.801 -25.777 -44.136  1.00  0.00           C  
ATOM   4633  CG2 THR D 132     -19.199 -26.428 -42.820  1.00  0.00           C  
ATOM   4634  OG1 THR D 132     -19.916 -25.045 -44.659  1.00  0.00           O  
ATOM   4635  N   VAL D 133     -16.592 -25.380 -41.858  1.00  0.00           N  
ATOM   4636  CA  VAL D 133     -15.841 -26.007 -40.767  1.00  0.00           C  
ATOM   4637  C   VAL D 133     -16.615 -26.838 -39.631  1.00  0.00           C  
ATOM   4638  O   VAL D 133     -17.799 -26.597 -39.493  1.00  0.00           O  
ATOM   4639  CB  VAL D 133     -15.039 -24.881 -40.087  1.00  0.00           C  
ATOM   4640  CG1 VAL D 133     -14.076 -24.241 -41.076  1.00  0.00           C  
ATOM   4641  CG2 VAL D 133     -15.990 -23.843 -39.512  1.00  0.00           C  
ATOM   4642  N   ALA D 134     -15.990 -27.620 -38.749  1.00  0.00           N  
ATOM   4643  CA  ALA D 134     -16.650 -28.414 -37.726  1.00  0.00           C  
ATOM   4644  C   ALA D 134     -15.896 -28.314 -36.362  1.00  0.00           C  
ATOM   4645  O   ALA D 134     -14.628 -28.087 -36.323  1.00  0.00           O  
ATOM   4646  CB  ALA D 134     -16.837 -29.853 -38.181  1.00  0.00           C  
ATOM   4647  N   ASP D 135     -16.728 -28.458 -35.302  1.00  0.00           N  
ATOM   4648  CA  ASP D 135     -16.185 -28.299 -33.921  1.00  0.00           C  
ATOM   4649  C   ASP D 135     -15.154 -29.377 -33.388  1.00  0.00           C  
ATOM   4650  O   ASP D 135     -15.629 -30.407 -32.930  1.00  0.00           O  
ATOM   4651  CB  ASP D 135     -17.368 -28.243 -32.951  1.00  0.00           C  
ATOM   4652  CG  ASP D 135     -16.942 -27.982 -31.512  1.00  0.00           C  
ATOM   4653  OD1 ASP D 135     -15.770 -28.077 -31.234  1.00  0.00           O  
ATOM   4654  OD2 ASP D 135     -17.793 -27.691 -30.706  1.00  0.00           O1-
ATOM   4655  N   ALA D 136     -13.848 -29.065 -33.310  1.00  0.00           N  
ATOM   4656  CA  ALA D 136     -12.788 -30.021 -32.908  1.00  0.00           C  
ATOM   4657  C   ALA D 136     -12.608 -30.135 -31.380  1.00  0.00           C  
ATOM   4658  O   ALA D 136     -11.607 -29.752 -30.792  1.00  0.00           O  
ATOM   4659  CB  ALA D 136     -11.462 -29.579 -33.478  1.00  0.00           C  
ATOM   4660  N   LYS D 137     -13.737 -30.546 -30.687  1.00  0.00           N  
ATOM   4661  CA  LYS D 137     -13.753 -30.751 -29.232  1.00  0.00           C  
ATOM   4662  C   LYS D 137     -13.160 -32.061 -28.793  1.00  0.00           C  
ATOM   4663  O   LYS D 137     -13.604 -33.125 -29.159  1.00  0.00           O  
ATOM   4664  CB  LYS D 137     -15.184 -30.652 -28.701  1.00  0.00           C  
ATOM   4665  CG  LYS D 137     -15.300 -30.744 -27.185  1.00  0.00           C  
ATOM   4666  CD  LYS D 137     -16.713 -30.428 -26.719  1.00  0.00           C  
ATOM   4667  CE  LYS D 137     -16.817 -30.462 -25.201  1.00  0.00           C  
ATOM   4668  NZ  LYS D 137     -16.033 -29.369 -24.565  1.00  0.00           N1+
ATOM   4669  N   ASP D 138     -12.141 -31.957 -27.882  1.00  0.00           N  
ATOM   4670  CA  ASP D 138     -11.444 -33.219 -27.434  1.00  0.00           C  
ATOM   4671  C   ASP D 138     -10.823 -33.210 -26.004  1.00  0.00           C  
ATOM   4672  O   ASP D 138     -10.151 -34.196 -25.601  1.00  0.00           O  
ATOM   4673  CB  ASP D 138     -10.333 -33.560 -28.430  1.00  0.00           C  
ATOM   4674  CG  ASP D 138      -9.280 -32.466 -28.540  1.00  0.00           C  
ATOM   4675  OD1 ASP D 138      -9.230 -31.627 -27.672  1.00  0.00           O  
ATOM   4676  OD2 ASP D 138      -8.535 -32.480 -29.491  1.00  0.00           O1-
ATOM   4677  N   GLY D 139     -10.990 -32.100 -25.338  1.00  0.00           N  
ATOM   4678  CA  GLY D 139     -10.430 -31.912 -23.975  1.00  0.00           C  
ATOM   4679  C   GLY D 139      -9.268 -30.966 -23.925  1.00  0.00           C  
ATOM   4680  O   GLY D 139      -8.830 -30.648 -22.819  1.00  0.00           O  
ATOM   4681  N   LYS D 140      -8.613 -30.569 -25.079  1.00  0.00           N  
ATOM   4682  CA  LYS D 140      -7.483 -29.604 -25.100  1.00  0.00           C  
ATOM   4683  C   LYS D 140      -7.866 -28.237 -25.618  1.00  0.00           C  
ATOM   4684  O   LYS D 140      -7.014 -27.420 -25.778  1.00  0.00           O  
ATOM   4685  CB  LYS D 140      -6.331 -30.148 -25.946  1.00  0.00           C  
ATOM   4686  CG  LYS D 140      -5.674 -31.401 -25.382  1.00  0.00           C  
ATOM   4687  CD  LYS D 140      -4.515 -31.858 -26.255  1.00  0.00           C  
ATOM   4688  CE  LYS D 140      -3.848 -33.101 -25.685  1.00  0.00           C  
ATOM   4689  NZ  LYS D 140      -2.731 -33.577 -26.546  1.00  0.00           N1+
ATOM   4690  N   GLU D 141      -9.146 -28.070 -25.922  1.00  0.00           N  
ATOM   4691  CA  GLU D 141      -9.628 -26.835 -26.437  1.00  0.00           C  
ATOM   4692  C   GLU D 141      -9.721 -25.846 -25.285  1.00  0.00           C  
ATOM   4693  O   GLU D 141      -9.989 -26.296 -24.147  1.00  0.00           O  
ATOM   4694  CB  GLU D 141     -10.988 -27.023 -27.113  1.00  0.00           C  
ATOM   4695  CG  GLU D 141     -12.132 -27.316 -26.153  1.00  0.00           C  
ATOM   4696  CD  GLU D 141     -12.269 -28.778 -25.834  1.00  0.00           C  
ATOM   4697  OE1 GLU D 141     -11.488 -29.552 -26.334  1.00  0.00           O  
ATOM   4698  OE2 GLU D 141     -13.155 -29.123 -25.088  1.00  0.00           O1-
ATOM   4699  N   ILE D 142      -9.547 -24.551 -25.490  1.00  0.00           N  
ATOM   4700  CA  ILE D 142      -9.768 -23.515 -24.419  1.00  0.00           C  
ATOM   4701  C   ILE D 142     -11.328 -23.183 -24.393  1.00  0.00           C  
ATOM   4702  O   ILE D 142     -11.917 -22.915 -25.402  1.00  0.00           O  
ATOM   4703  CB  ILE D 142      -8.943 -22.241 -24.680  1.00  0.00           C  
ATOM   4704  CG1 ILE D 142      -7.447 -22.541 -24.564  1.00  0.00           C  
ATOM   4705  CG2 ILE D 142      -9.345 -21.140 -23.711  1.00  0.00           C  
ATOM   4706  CD1 ILE D 142      -6.559 -21.384 -24.962  1.00  0.00           C  
ATOM   4707  N   ASP D 143     -11.900 -23.272 -23.206  1.00  0.00           N  
ATOM   4708  CA  ASP D 143     -13.311 -22.889 -22.915  1.00  0.00           C  
ATOM   4709  C   ASP D 143     -13.419 -21.376 -22.987  1.00  0.00           C  
ATOM   4710  O   ASP D 143     -12.518 -20.690 -22.521  1.00  0.00           O  
ATOM   4711  CB  ASP D 143     -13.762 -23.379 -21.536  1.00  0.00           C  
ATOM   4712  CG  ASP D 143     -15.239 -23.123 -21.270  1.00  0.00           C  
ATOM   4713  OD1 ASP D 143     -15.586 -22.001 -20.985  1.00  0.00           O  
ATOM   4714  OD2 ASP D 143     -16.007 -24.052 -21.354  1.00  0.00           O1-
ATOM   4715  N   THR D 144     -14.493 -20.797 -23.554  1.00  0.00           N  
ATOM   4716  CA  THR D 144     -14.683 -19.342 -23.665  1.00  0.00           C  
ATOM   4717  C   THR D 144     -14.569 -18.460 -22.364  1.00  0.00           C  
ATOM   4718  O   THR D 144     -14.428 -17.243 -22.406  1.00  0.00           O  
ATOM   4719  CB  THR D 144     -16.060 -19.085 -24.306  1.00  0.00           C  
ATOM   4720  CG2 THR D 144     -16.115 -19.676 -25.707  1.00  0.00           C  
ATOM   4721  OG1 THR D 144     -17.084 -19.680 -23.500  1.00  0.00           O  
ATOM   4722  N   LYS D 145     -14.626 -19.196 -21.168  1.00  0.00           N  
ATOM   4723  CA  LYS D 145     -14.419 -18.493 -19.894  1.00  0.00           C  
ATOM   4724  C   LYS D 145     -13.044 -17.765 -19.769  1.00  0.00           C  
ATOM   4725  O   LYS D 145     -13.014 -16.906 -18.915  1.00  0.00           O  
ATOM   4726  CB  LYS D 145     -14.581 -19.486 -18.742  1.00  0.00           C  
ATOM   4727  CG  LYS D 145     -13.436 -20.480 -18.603  1.00  0.00           C  
ATOM   4728  CD  LYS D 145     -13.728 -21.512 -17.523  1.00  0.00           C  
ATOM   4729  CE  LYS D 145     -13.821 -20.865 -16.149  1.00  0.00           C  
ATOM   4730  NZ  LYS D 145     -13.962 -21.876 -15.066  1.00  0.00           N1+
ATOM   4731  N   HIS D 146     -12.070 -18.081 -20.585  1.00  0.00           N  
ATOM   4732  CA  HIS D 146     -10.751 -17.255 -20.564  1.00  0.00           C  
ATOM   4733  C   HIS D 146     -10.493 -16.566 -21.953  1.00  0.00           C  
ATOM   4734  O   HIS D 146      -9.367 -16.117 -22.179  1.00  0.00           O  
ATOM   4735  CB  HIS D 146      -9.545 -18.131 -20.211  1.00  0.00           C  
ATOM   4736  CG  HIS D 146      -9.555 -18.629 -18.799  1.00  0.00           C  
ATOM   4737  CD2 HIS D 146      -9.795 -19.859 -18.289  1.00  0.00           C  
ATOM   4738  ND1 HIS D 146      -9.292 -17.810 -17.721  1.00  0.00           N  
ATOM   4739  CE1 HIS D 146      -9.371 -18.518 -16.607  1.00  0.00           C  
ATOM   4740  NE2 HIS D 146      -9.674 -19.763 -16.924  1.00  0.00           N  
ATOM   4741  N   LEU D 147     -11.558 -16.383 -22.838  1.00  0.00           N  
ATOM   4742  CA  LEU D 147     -11.372 -15.770 -24.141  1.00  0.00           C  
ATOM   4743  C   LEU D 147     -12.053 -14.358 -24.181  1.00  0.00           C  
ATOM   4744  O   LEU D 147     -13.165 -14.141 -23.675  1.00  0.00           O  
ATOM   4745  CB  LEU D 147     -11.951 -16.681 -25.230  1.00  0.00           C  
ATOM   4746  CG  LEU D 147     -11.360 -18.095 -25.300  1.00  0.00           C  
ATOM   4747  CD1 LEU D 147     -12.048 -18.880 -26.408  1.00  0.00           C  
ATOM   4748  CD2 LEU D 147      -9.860 -18.006 -25.542  1.00  0.00           C  
ATOM   4749  N   PRO D 148     -11.436 -13.345 -24.829  1.00  0.00           N  
ATOM   4750  CA  PRO D 148     -11.929 -12.011 -25.132  1.00  0.00           C  
ATOM   4751  C   PRO D 148     -13.298 -12.129 -25.886  1.00  0.00           C  
ATOM   4752  O   PRO D 148     -13.591 -13.064 -26.618  1.00  0.00           O  
ATOM   4753  CB  PRO D 148     -10.821 -11.429 -26.015  1.00  0.00           C  
ATOM   4754  CG  PRO D 148      -9.595 -12.167 -25.598  1.00  0.00           C  
ATOM   4755  CD  PRO D 148     -10.075 -13.569 -25.331  1.00  0.00           C  
ATOM   4756  N   SER D 149     -14.123 -11.106 -25.743  1.00  0.00           N  
ATOM   4757  CA  SER D 149     -15.521 -11.004 -26.262  1.00  0.00           C  
ATOM   4758  C   SER D 149     -15.541 -11.123 -27.814  1.00  0.00           C  
ATOM   4759  O   SER D 149     -16.566 -11.528 -28.424  1.00  0.00           O  
ATOM   4760  CB  SER D 149     -16.147  -9.689 -25.838  1.00  0.00           C  
ATOM   4761  OG  SER D 149     -15.508  -8.606 -26.456  1.00  0.00           O  
ATOM   4762  N   THR D 150     -14.368 -10.779 -28.433  1.00  0.00           N  
ATOM   4763  CA  THR D 150     -14.137 -10.798 -29.889  1.00  0.00           C  
ATOM   4764  C   THR D 150     -13.431 -12.094 -30.365  1.00  0.00           C  
ATOM   4765  O   THR D 150     -13.175 -12.182 -31.542  1.00  0.00           O  
ATOM   4766  CB  THR D 150     -13.307  -9.575 -30.321  1.00  0.00           C  
ATOM   4767  CG2 THR D 150     -14.022  -8.286 -29.947  1.00  0.00           C  
ATOM   4768  OG1 THR D 150     -12.027  -9.612 -29.677  1.00  0.00           O  
ATOM   4769  N   CYS D 151     -13.196 -12.972 -29.434  1.00  0.00           N  
ATOM   4770  CA  CYS D 151     -12.477 -14.243 -29.728  1.00  0.00           C  
ATOM   4771  C   CYS D 151     -13.189 -15.474 -29.255  1.00  0.00           C  
ATOM   4772  O   CYS D 151     -12.650 -16.458 -28.715  1.00  0.00           O  
ATOM   4773  CB  CYS D 151     -11.088 -14.236 -29.088  1.00  0.00           C  
ATOM   4774  SG  CYS D 151     -10.007 -12.915 -29.684  1.00  0.00           S  
ATOM   4775  N   ARG D 152     -14.474 -15.458 -29.335  1.00  0.00           N  
ATOM   4776  CA  ARG D 152     -15.386 -16.508 -28.950  1.00  0.00           C  
ATOM   4777  C   ARG D 152     -16.272 -17.165 -29.996  1.00  0.00           C  
ATOM   4778  O   ARG D 152     -17.383 -17.610 -29.699  1.00  0.00           O  
ATOM   4779  CB  ARG D 152     -16.298 -15.959 -27.863  1.00  0.00           C  
ATOM   4780  CG  ARG D 152     -15.595 -15.578 -26.570  1.00  0.00           C  
ATOM   4781  CD  ARG D 152     -16.498 -14.840 -25.650  1.00  0.00           C  
ATOM   4782  NE  ARG D 152     -15.782 -14.298 -24.507  1.00  0.00           N  
ATOM   4783  CZ  ARG D 152     -16.315 -13.458 -23.598  1.00  0.00           C  
ATOM   4784  NH1 ARG D 152     -17.568 -13.075 -23.713  1.00  0.00           N1+
ATOM   4785  NH2 ARG D 152     -15.580 -13.019 -22.591  1.00  0.00           N  
ATOM   4786  N   ASP D 153     -15.853 -17.135 -31.250  1.00  0.00           N  
ATOM   4787  CA  ASP D 153     -16.537 -17.691 -32.503  1.00  0.00           C  
ATOM   4788  C   ASP D 153     -16.504 -19.221 -32.502  1.00  0.00           C  
ATOM   4789  O   ASP D 153     -15.755 -19.907 -31.805  1.00  0.00           O  
ATOM   4790  CB  ASP D 153     -15.870 -17.183 -33.783  1.00  0.00           C  
ATOM   4791  CG  ASP D 153     -16.084 -15.693 -34.012  1.00  0.00           C  
ATOM   4792  OD1 ASP D 153     -17.039 -15.164 -33.495  1.00  0.00           O  
ATOM   4793  OD2 ASP D 153     -15.290 -15.098 -34.701  1.00  0.00           O1-
ATOM   4794  N   ASN D 154     -17.400 -19.825 -33.330  1.00  0.00           N  
ATOM   4795  CA  ASN D 154     -17.465 -21.314 -33.459  1.00  0.00           C  
ATOM   4796  C   ASN D 154     -17.847 -21.788 -34.913  1.00  0.00           C  
ATOM   4797  O   ASN D 154     -18.160 -20.935 -35.771  1.00  0.00           O  
ATOM   4798  CB  ASN D 154     -18.443 -21.878 -32.446  1.00  0.00           C  
ATOM   4799  CG  ASN D 154     -19.853 -21.413 -32.682  1.00  0.00           C  
ATOM   4800  ND2 ASN D 154     -20.481 -20.903 -31.653  1.00  0.00           N  
ATOM   4801  OD1 ASN D 154     -20.374 -21.514 -33.799  1.00  0.00           O  
ATOM   4802  N   PHE D 155     -17.920 -23.094 -35.207  1.00  0.00           N  
ATOM   4803  CA  PHE D 155     -18.205 -23.692 -36.478  1.00  0.00           C  
ATOM   4804  C   PHE D 155     -19.452 -23.193 -37.248  1.00  0.00           C  
ATOM   4805  O   PHE D 155     -19.500 -23.482 -38.465  1.00  0.00           O  
ATOM   4806  CB  PHE D 155     -18.326 -25.202 -36.265  1.00  0.00           C  
ATOM   4807  CG  PHE D 155     -19.562 -25.611 -35.516  1.00  0.00           C  
ATOM   4808  CD1 PHE D 155     -20.677 -26.083 -36.193  1.00  0.00           C  
ATOM   4809  CD2 PHE D 155     -19.614 -25.524 -34.133  1.00  0.00           C  
ATOM   4810  CE1 PHE D 155     -21.815 -26.459 -35.505  1.00  0.00           C  
ATOM   4811  CE2 PHE D 155     -20.749 -25.900 -33.442  1.00  0.00           C  
ATOM   4812  CZ  PHE D 155     -21.851 -26.368 -34.130  1.00  0.00           C  
ATOM   4813  N   ASP D 156     -20.420 -22.528 -36.594  1.00  0.00           N  
ATOM   4814  CA  ASP D 156     -21.599 -21.946 -37.283  1.00  0.00           C  
ATOM   4815  C   ASP D 156     -21.465 -20.589 -37.902  1.00  0.00           C  
ATOM   4816  O   ASP D 156     -22.322 -20.195 -38.663  1.00  0.00           O  
ATOM   4817  CB  ASP D 156     -22.774 -21.876 -36.304  1.00  0.00           C  
ATOM   4818  CG  ASP D 156     -23.366 -23.243 -35.990  1.00  0.00           C  
ATOM   4819  OD1 ASP D 156     -23.386 -24.076 -36.866  1.00  0.00           O  
ATOM   4820  OD2 ASP D 156     -23.792 -23.442 -34.878  1.00  0.00           O1-
ATOM   4821  N   ALA D 157     -20.290 -19.920 -37.694  1.00  0.00           N  
ATOM   4822  CA  ALA D 157     -19.958 -18.603 -38.201  1.00  0.00           C  
ATOM   4823  C   ALA D 157     -19.916 -18.343 -39.656  1.00  0.00           C  
ATOM   4824  O   ALA D 157     -19.457 -19.154 -40.444  1.00  0.00           O  
ATOM   4825  CB  ALA D 157     -18.640 -18.187 -37.501  1.00  0.00           C  
ATOM   4826  N   LYS D 158     -20.484 -17.198 -40.085  1.00  0.00           N  
ATOM   4827  CA  LYS D 158     -20.558 -16.761 -41.503  1.00  0.00           C  
ATOM   4828  C   LYS D 158     -20.926 -15.240 -41.666  1.00  0.00           C  
ATOM   4829  O   LYS D 158     -21.426 -14.612 -40.742  1.00  0.00           O  
ATOM   4830  CB  LYS D 158     -21.573 -17.626 -42.253  1.00  0.00           C  
ATOM   4831  CG  LYS D 158     -21.666 -17.335 -43.745  1.00  0.00           C  
ATOM   4832  CD  LYS D 158     -22.621 -18.296 -44.437  1.00  0.00           C  
ATOM   4833  CE  LYS D 158     -22.725 -17.998 -45.926  1.00  0.00           C  
ATOM   4834  NZ  LYS D 158     -23.677 -18.914 -46.611  1.00  0.00           N1+
ATOM   4835  OXT LYS D 158     -20.718 -14.680 -42.707  1.00  0.00           O1-
TER    4836      LYS D 158 
ATOM   4837  N   PHE E   1       9.436  -2.165  35.331  1.00  0.00           N  
ATOM   4838  CA  PHE E   1       8.374  -1.528  36.169  1.00  0.00           C  
ATOM   4839  C   PHE E   1       6.937  -1.755  35.698  1.00  0.00           C  
ATOM   4840  O   PHE E   1       6.409  -2.870  35.600  1.00  0.00           O  
ATOM   4841  CB  PHE E   1       8.614  -0.020  36.247  1.00  0.00           C  
ATOM   4842  CG  PHE E   1       9.792   0.363  37.097  1.00  0.00           C  
ATOM   4843  CD1 PHE E   1      10.974   0.796  36.515  1.00  0.00           C  
ATOM   4844  CD2 PHE E   1       9.721   0.290  38.480  1.00  0.00           C  
ATOM   4845  CE1 PHE E   1      12.059   1.148  37.297  1.00  0.00           C  
ATOM   4846  CE2 PHE E   1      10.803   0.642  39.264  1.00  0.00           C  
ATOM   4847  CZ  PHE E   1      11.973   1.072  38.670  1.00  0.00           C  
ATOM   4848  N   THR E   2       6.255  -0.691  35.205  1.00  0.00           N  
ATOM   4849  CA  THR E   2       4.852  -0.784  34.738  1.00  0.00           C  
ATOM   4850  C   THR E   2       4.692  -0.664  33.211  1.00  0.00           C  
ATOM   4851  O   THR E   2       4.617  -1.690  32.562  1.00  0.00           O  
ATOM   4852  CB  THR E   2       3.988   0.297  35.415  1.00  0.00           C  
ATOM   4853  CG2 THR E   2       3.970   0.099  36.922  1.00  0.00           C  
ATOM   4854  OG1 THR E   2       4.518   1.594  35.113  1.00  0.00           O  
ATOM   4855  N   LEU E   3       4.675   0.585  32.678  1.00  0.00           N  
ATOM   4856  CA  LEU E   3       4.634   0.750  31.193  1.00  0.00           C  
ATOM   4857  C   LEU E   3       5.849   0.233  30.487  1.00  0.00           C  
ATOM   4858  O   LEU E   3       6.910   0.846  30.646  1.00  0.00           O  
ATOM   4859  CB  LEU E   3       4.464   2.229  30.825  1.00  0.00           C  
ATOM   4860  CG  LEU E   3       4.383   2.536  29.324  1.00  0.00           C  
ATOM   4861  CD1 LEU E   3       3.119   1.915  28.746  1.00  0.00           C  
ATOM   4862  CD2 LEU E   3       4.399   4.042  29.112  1.00  0.00           C  
ATOM   4863  N   ILE E   4       5.576  -0.755  29.643  1.00  0.00           N  
ATOM   4864  CA  ILE E   4       6.470  -1.504  28.804  1.00  0.00           C  
ATOM   4865  C   ILE E   4       5.938  -1.731  27.395  1.00  0.00           C  
ATOM   4866  O   ILE E   4       6.823  -1.582  26.504  1.00  0.00           O  
ATOM   4867  CB  ILE E   4       6.783  -2.864  29.453  1.00  0.00           C  
ATOM   4868  CG1 ILE E   4       5.500  -3.684  29.618  1.00  0.00           C  
ATOM   4869  CG2 ILE E   4       7.469  -2.668  30.796  1.00  0.00           C  
ATOM   4870  CD1 ILE E   4       5.740  -5.113  30.048  1.00  0.00           C  
ATOM   4871  N   GLU E   5       4.703  -1.797  27.109  1.00  0.00           N  
ATOM   4872  CA  GLU E   5       4.150  -1.934  25.753  1.00  0.00           C  
ATOM   4873  C   GLU E   5       4.516  -0.761  24.834  1.00  0.00           C  
ATOM   4874  O   GLU E   5       4.684  -1.085  23.626  1.00  0.00           O  
ATOM   4875  CB  GLU E   5       2.627  -2.067  25.823  1.00  0.00           C  
ATOM   4876  CG  GLU E   5       1.934  -0.963  26.610  1.00  0.00           C  
ATOM   4877  CD  GLU E   5       1.865  -1.251  28.084  1.00  0.00           C  
ATOM   4878  OE1 GLU E   5       2.846  -1.697  28.630  1.00  0.00           O  
ATOM   4879  OE2 GLU E   5       0.830  -1.024  28.665  1.00  0.00           O1-
ATOM   4880  N   LEU E   6       4.814   0.386  25.365  1.00  0.00           N  
ATOM   4881  CA  LEU E   6       5.376   1.519  24.642  1.00  0.00           C  
ATOM   4882  C   LEU E   6       6.702   1.244  23.912  1.00  0.00           C  
ATOM   4883  O   LEU E   6       6.810   1.537  22.689  1.00  0.00           O  
ATOM   4884  CB  LEU E   6       5.582   2.679  25.625  1.00  0.00           C  
ATOM   4885  CG  LEU E   6       6.270   3.924  25.051  1.00  0.00           C  
ATOM   4886  CD1 LEU E   6       5.397   4.531  23.961  1.00  0.00           C  
ATOM   4887  CD2 LEU E   6       6.524   4.924  26.169  1.00  0.00           C  
ATOM   4888  N   MET E   7       7.740   0.826  24.616  1.00  0.00           N  
ATOM   4889  CA  MET E   7       9.030   0.600  24.066  1.00  0.00           C  
ATOM   4890  C   MET E   7       8.945  -0.631  23.217  1.00  0.00           C  
ATOM   4891  O   MET E   7       9.638  -0.775  22.202  1.00  0.00           O  
ATOM   4892  CB  MET E   7      10.079   0.452  25.166  1.00  0.00           C  
ATOM   4893  CG  MET E   7      10.345   1.724  25.958  1.00  0.00           C  
ATOM   4894  SD  MET E   7      10.793   3.118  24.905  1.00  0.00           S  
ATOM   4895  CE  MET E   7      12.353   2.549  24.235  1.00  0.00           C  
ATOM   4896  N   ILE E   8       8.076  -1.619  23.525  1.00  0.00           N  
ATOM   4897  CA  ILE E   8       7.848  -2.826  22.714  1.00  0.00           C  
ATOM   4898  C   ILE E   8       7.328  -2.606  21.340  1.00  0.00           C  
ATOM   4899  O   ILE E   8       7.892  -2.980  20.368  1.00  0.00           O  
ATOM   4900  CB  ILE E   8       6.868  -3.774  23.430  1.00  0.00           C  
ATOM   4901  CG1 ILE E   8       7.514  -4.359  24.688  1.00  0.00           C  
ATOM   4902  CG2 ILE E   8       6.421  -4.884  22.491  1.00  0.00           C  
ATOM   4903  CD1 ILE E   8       6.543  -5.083  25.593  1.00  0.00           C  
ATOM   4904  N   VAL E   9       6.292  -1.733  21.184  1.00  0.00           N  
ATOM   4905  CA  VAL E   9       5.707  -1.258  19.843  1.00  0.00           C  
ATOM   4906  C   VAL E   9       6.778  -0.402  19.193  1.00  0.00           C  
ATOM   4907  O   VAL E   9       7.037  -0.650  18.019  1.00  0.00           O  
ATOM   4908  CB  VAL E   9       4.420  -0.429  20.014  1.00  0.00           C  
ATOM   4909  CG1 VAL E   9       3.996   0.176  18.684  1.00  0.00           C  
ATOM   4910  CG2 VAL E   9       3.314  -1.301  20.587  1.00  0.00           C  
ATOM   4911  N   ILE E  10       7.527   0.485  19.855  1.00  0.00           N  
ATOM   4912  CA  ILE E  10       8.572   1.283  19.242  1.00  0.00           C  
ATOM   4913  C   ILE E  10       9.564   0.321  18.605  1.00  0.00           C  
ATOM   4914  O   ILE E  10       9.943   0.447  17.434  1.00  0.00           O  
ATOM   4915  CB  ILE E  10       9.279   2.188  20.268  1.00  0.00           C  
ATOM   4916  CG1 ILE E  10       8.352   3.324  20.707  1.00  0.00           C  
ATOM   4917  CG2 ILE E  10      10.569   2.744  19.686  1.00  0.00           C  
ATOM   4918  CD1 ILE E  10       8.845   4.082  21.918  1.00  0.00           C  
ATOM   4919  N   ALA E  11       9.988  -0.759  19.297  1.00  0.00           N  
ATOM   4920  CA  ALA E  11      10.844  -1.784  18.753  1.00  0.00           C  
ATOM   4921  C   ALA E  11      10.356  -2.565  17.495  1.00  0.00           C  
ATOM   4922  O   ALA E  11      11.158  -2.753  16.622  1.00  0.00           O  
ATOM   4923  CB  ALA E  11      11.134  -2.768  19.927  1.00  0.00           C  
ATOM   4924  N   ILE E  12       9.060  -2.897  17.451  1.00  0.00           N  
ATOM   4925  CA  ILE E  12       8.372  -3.541  16.377  1.00  0.00           C  
ATOM   4926  C   ILE E  12       8.388  -2.598  15.139  1.00  0.00           C  
ATOM   4927  O   ILE E  12       8.506  -2.993  13.965  1.00  0.00           O  
ATOM   4928  CB  ILE E  12       6.929  -3.891  16.787  1.00  0.00           C  
ATOM   4929  CG1 ILE E  12       6.930  -4.959  17.883  1.00  0.00           C  
ATOM   4930  CG2 ILE E  12       6.134  -4.363  15.579  1.00  0.00           C  
ATOM   4931  CD1 ILE E  12       7.566  -6.264  17.464  1.00  0.00           C  
ATOM   4932  N   VAL E  13       8.217  -1.317  15.371  1.00  0.00           N  
ATOM   4933  CA  VAL E  13       8.244  -0.237  14.285  1.00  0.00           C  
ATOM   4934  C   VAL E  13       9.674  -0.295  13.658  1.00  0.00           C  
ATOM   4935  O   VAL E  13       9.863  -0.362  12.440  1.00  0.00           O  
ATOM   4936  CB  VAL E  13       7.971   1.168  14.855  1.00  0.00           C  
ATOM   4937  CG1 VAL E  13       8.235   2.232  13.799  1.00  0.00           C  
ATOM   4938  CG2 VAL E  13       6.539   1.253  15.359  1.00  0.00           C  
ATOM   4939  N   GLY E  14      10.688  -0.406  14.530  1.00  0.00           N  
ATOM   4940  CA  GLY E  14      12.083  -0.604  14.200  1.00  0.00           C
[truncated: 383,057 more chars]
