# Supplementary material for: Predicting and Interpreting the Structure of Type IV Pilus of Electricigens by Molecular Dynamics Simulations
Source: Molecules. 2017 Aug 12;22(8):1342. doi: 10.3390/molecules22081342 (PMC6152092; doi:10.3390/molecules22081342)
Supplement: Supplementary file 1 [file molecules-22-01342-s001.zip › Neisseria gonorrhoeae 3 (GC3).pdb]

ATOM      1  N   PHE A   1       8.051  -4.837 -86.727  1.00  0.00           N  
ATOM      2  CA  PHE A   1       6.976  -4.432 -85.771  1.00  0.00           C  
ATOM      3  C   PHE A   1       5.690  -3.975 -86.469  1.00  0.00           C  
ATOM      4  O   PHE A   1       4.594  -4.209 -85.957  1.00  0.00           O  
ATOM      5  CB  PHE A   1       7.469  -3.304 -84.863  1.00  0.00           C  
ATOM      6  CG  PHE A   1       8.595  -3.706 -83.954  1.00  0.00           C  
ATOM      7  CD1 PHE A   1       9.072  -5.009 -83.951  1.00  0.00           C  
ATOM      8  CD2 PHE A   1       9.180  -2.784 -83.099  1.00  0.00           C  
ATOM      9  CE1 PHE A   1      10.108  -5.380 -83.115  1.00  0.00           C  
ATOM     10  CE2 PHE A   1      10.216  -3.152 -82.263  1.00  0.00           C  
ATOM     11  CZ  PHE A   1      10.680  -4.452 -82.272  1.00  0.00           C  
ATOM     12  N   THR A   2       5.823  -3.349 -87.644  1.00  0.00           N  
ATOM     13  CA  THR A   2       4.655  -2.881 -88.405  1.00  0.00           C  
ATOM     14  C   THR A   2       4.818  -2.710 -89.924  1.00  0.00           C  
ATOM     15  O   THR A   2       4.212  -3.439 -90.714  1.00  0.00           O  
ATOM     16  CB  THR A   2       4.175  -1.539 -87.824  1.00  0.00           C  
ATOM     17  CG2 THR A   2       2.987  -1.009 -88.613  1.00  0.00           C  
ATOM     18  OG1 THR A   2       3.792  -1.718 -86.454  1.00  0.00           O  
ATOM     19  N   LEU A   3       5.638  -1.730 -90.306  1.00  0.00           N  
ATOM     20  CA  LEU A   3       5.849  -1.350 -91.707  1.00  0.00           C  
ATOM     21  C   LEU A   3       6.634  -2.364 -92.546  1.00  0.00           C  
ATOM     22  O   LEU A   3       7.798  -2.127 -92.893  1.00  0.00           O  
ATOM     23  CB  LEU A   3       6.578  -0.001 -91.756  1.00  0.00           C  
ATOM     24  CG  LEU A   3       6.842   0.561 -93.159  1.00  0.00           C  
ATOM     25  CD1 LEU A   3       5.516   0.848 -93.850  1.00  0.00           C  
ATOM     26  CD2 LEU A   3       7.686   1.822 -93.050  1.00  0.00           C  
ATOM     27  N   ILE A   4       5.995  -3.484 -92.881  1.00  0.00           N  
ATOM     28  CA  ILE A   4       6.605  -4.463 -93.781  1.00  0.00           C  
ATOM     29  C   ILE A   4       5.753  -4.738 -95.032  1.00  0.00           C  
ATOM     30  O   ILE A   4       6.265  -5.224 -96.042  1.00  0.00           O  
ATOM     31  CB  ILE A   4       6.855  -5.788 -93.038  1.00  0.00           C  
ATOM     32  CG1 ILE A   4       5.531  -6.393 -92.564  1.00  0.00           C  
ATOM     33  CG2 ILE A   4       7.794  -5.569 -91.862  1.00  0.00           C  
ATOM     34  CD1 ILE A   4       5.659  -7.802 -92.032  1.00  0.00           C  
ATOM     35  N   GLU A   5       4.464  -4.408 -94.957  1.00  0.00           N  
ATOM     36  CA  GLU A   5       3.526  -4.646 -96.051  1.00  0.00           C  
ATOM     37  C   GLU A   5       3.824  -3.732 -97.241  1.00  0.00           C  
ATOM     38  O   GLU A   5       3.760  -4.161 -98.391  1.00  0.00           O  
ATOM     39  CB  GLU A   5       2.087  -4.432 -95.576  1.00  0.00           C  
ATOM     40  CG  GLU A   5       1.588  -5.480 -94.591  1.00  0.00           C  
ATOM     41  CD  GLU A   5       0.189  -5.211 -94.111  1.00  0.00           C  
ATOM     42  OE1 GLU A   5      -0.325  -4.157 -94.398  1.00  0.00           O  
ATOM     43  OE2 GLU A   5      -0.366  -6.062 -93.456  1.00  0.00           O1-
ATOM     44  N   LEU A   6       4.150  -2.473 -96.953  1.00  0.00           N  
ATOM     45  CA  LEU A   6       4.555  -1.515 -97.979  1.00  0.00           C  
ATOM     46  C   LEU A   6       5.767  -2.024 -98.756  1.00  0.00           C  
ATOM     47  O   LEU A   6       5.775  -2.004 -99.987  1.00  0.00           O  
ATOM     48  CB  LEU A   6       4.880  -0.158 -97.342  1.00  0.00           C  
ATOM     49  CG  LEU A   6       5.330   0.942 -98.312  1.00  0.00           C  
ATOM     50  CD1 LEU A   6       4.206   1.245 -99.293  1.00  0.00           C  
ATOM     51  CD2 LEU A   6       5.719   2.185 -97.525  1.00  0.00           C  
ATOM     52  N   MET A   7       6.782  -2.484 -98.024  1.00  0.00           N  
ATOM     53  CA  MET A   7       7.970  -3.101 -98.614  1.00  0.00           C  
ATOM     54  C   MET A   7       7.640  -4.287 -99.525  1.00  0.00           C  
ATOM     55  O   MET A   7       8.128  -4.355-100.653  1.00  0.00           O  
ATOM     56  CB  MET A   7       8.923  -3.542 -97.505  1.00  0.00           C  
ATOM     57  CG  MET A   7      10.160  -4.280 -97.995  1.00  0.00           C  
ATOM     58  SD  MET A   7      11.160  -4.935 -96.643  1.00  0.00           S  
ATOM     59  CE  MET A   7      10.080  -6.218 -96.015  1.00  0.00           C  
ATOM     60  N   ILE A   8       6.825  -5.219 -99.031  1.00  0.00           N  
ATOM     61  CA  ILE A   8       6.454  -6.398 -99.817  1.00  0.00           C  
ATOM     62  C   ILE A   8       5.744  -6.010-101.116  1.00  0.00           C  
ATOM     63  O   ILE A   8       6.113  -6.489-102.190  1.00  0.00           O  
ATOM     64  CB  ILE A   8       5.548  -7.335 -98.999  1.00  0.00           C  
ATOM     65  CG1 ILE A   8       6.331  -7.959 -97.841  1.00  0.00           C  
ATOM     66  CG2 ILE A   8       4.958  -8.417 -99.890  1.00  0.00           C  
ATOM     67  CD1 ILE A   8       5.459  -8.641 -96.811  1.00  0.00           C  
ATOM     68  N   VAL A   9       4.748  -5.127-101.023  1.00  0.00           N  
ATOM     69  CA  VAL A   9       4.028  -4.643-102.205  1.00  0.00           C  
ATOM     70  C   VAL A   9       4.940  -3.930-103.225  1.00  0.00           C  
ATOM     71  O   VAL A   9       4.859  -4.205-104.423  1.00  0.00           O  
ATOM     72  CB  VAL A   9       2.912  -3.675-101.768  1.00  0.00           C  
ATOM     73  CG1 VAL A   9       2.319  -2.965-102.977  1.00  0.00           C  
ATOM     74  CG2 VAL A   9       1.836  -4.435-101.008  1.00  0.00           C  
ATOM     75  N   ILE A  10       5.811  -3.038-102.757  1.00  0.00           N  
ATOM     76  CA  ILE A  10       6.736  -2.349-103.664  1.00  0.00           C  
ATOM     77  C   ILE A  10       7.647  -3.358-104.374  1.00  0.00           C  
ATOM     78  O   ILE A  10       7.872  -3.261-105.584  1.00  0.00           O  
ATOM     79  CB  ILE A  10       7.593  -1.321-102.902  1.00  0.00           C  
ATOM     80  CG1 ILE A  10       6.727  -0.152-102.425  1.00  0.00           C  
ATOM     81  CG2 ILE A  10       8.730  -0.822-103.781  1.00  0.00           C  
ATOM     82  CD1 ILE A  10       7.422   0.759-101.439  1.00  0.00           C  
ATOM     83  N   ALA A  11       8.145  -4.331-103.614  1.00  0.00           N  
ATOM     84  CA  ALA A  11       8.987  -5.400-104.146  1.00  0.00           C  
ATOM     85  C   ALA A  11       8.280  -6.259-105.199  1.00  0.00           C  
ATOM     86  O   ALA A  11       8.894  -6.644-106.196  1.00  0.00           O  
ATOM     87  CB  ALA A  11       9.485  -6.276-103.006  1.00  0.00           C  
ATOM     88  N   ILE A  12       7.004  -6.569-104.974  1.00  0.00           N  
ATOM     89  CA  ILE A  12       6.230  -7.353-105.943  1.00  0.00           C  
ATOM     90  C   ILE A  12       6.050  -6.591-107.255  1.00  0.00           C  
ATOM     91  O   ILE A  12       6.207  -7.166-108.332  1.00  0.00           O  
ATOM     92  CB  ILE A  12       4.849  -7.724-105.372  1.00  0.00           C  
ATOM     93  CG1 ILE A  12       4.997  -8.726-104.224  1.00  0.00           C  
ATOM     94  CG2 ILE A  12       3.957  -8.291-106.466  1.00  0.00           C  
ATOM     95  CD1 ILE A  12       3.732  -8.927-103.423  1.00  0.00           C  
ATOM     96  N   VAL A  13       5.714  -5.306-107.157  1.00  0.00           N  
ATOM     97  CA  VAL A  13       5.575  -4.438-108.328  1.00  0.00           C  
ATOM     98  C   VAL A  13       6.931  -4.306-109.027  1.00  0.00           C  
ATOM     99  O   VAL A  13       7.018  -4.370-110.258  1.00  0.00           O  
ATOM    100  CB  VAL A  13       5.060  -3.046-107.917  1.00  0.00           C  
ATOM    101  CG1 VAL A  13       5.112  -2.089-109.099  1.00  0.00           C  
ATOM    102  CG2 VAL A  13       3.643  -3.157-107.375  1.00  0.00           C  
ATOM    103  N   GLY A  14       7.984  -4.133-108.228  1.00  0.00           N  
ATOM    104  CA  GLY A  14       9.347  -4.066-108.728  1.00  0.00           C  
ATOM    105  C   GLY A  14       9.698  -5.253-109.609  1.00  0.00           C  
ATOM    106  O   GLY A  14      10.015  -5.079-110.789  1.00  0.00           O  
ATOM    107  N   ILE A  15       9.637  -6.457-109.041  1.00  0.00           N  
ATOM    108  CA  ILE A  15      10.008  -7.673-109.769  1.00  0.00           C  
ATOM    109  C   ILE A  15       9.076  -7.949-110.951  1.00  0.00           C  
ATOM    110  O   ILE A  15       9.494  -8.543-111.945  1.00  0.00           O  
ATOM    111  CB  ILE A  15      10.006  -8.891-108.826  1.00  0.00           C  
ATOM    112  CG1 ILE A  15      10.698 -10.083-109.493  1.00  0.00           C  
ATOM    113  CG2 ILE A  15       8.584  -9.252-108.427  1.00  0.00           C  
ATOM    114  CD1 ILE A  15      12.171  -9.866-109.756  1.00  0.00           C  
ATOM    115  N   LEU A  16       7.820  -7.516-110.833  1.00  0.00           N  
ATOM    116  CA  LEU A  16       6.848  -7.628-111.925  1.00  0.00           C  
ATOM    117  C   LEU A  16       7.351  -6.885-113.159  1.00  0.00           C  
ATOM    118  O   LEU A  16       7.349  -7.434-114.262  1.00  0.00           O  
ATOM    119  CB  LEU A  16       5.489  -7.063-111.494  1.00  0.00           C  
ATOM    120  CG  LEU A  16       4.395  -7.069-112.569  1.00  0.00           C  
ATOM    121  CD1 LEU A  16       4.098  -8.504-112.984  1.00  0.00           C  
ATOM    122  CD2 LEU A  16       3.147  -6.387-112.029  1.00  0.00           C  
ATOM    123  N   ALA A  17       7.778  -5.638-112.958  1.00  0.00           N  
ATOM    124  CA  ALA A  17       8.370  -4.827-114.019  1.00  0.00           C  
ATOM    125  C   ALA A  17       9.666  -5.449-114.535  1.00  0.00           C  
ATOM    126  O   ALA A  17       9.927  -5.434-115.738  1.00  0.00           O  
ATOM    127  CB  ALA A  17       8.619  -3.410-113.524  1.00  0.00           C  
ATOM    128  N   ALA A  18      10.461  -5.997-113.617  1.00  0.00           N  
ATOM    129  CA  ALA A  18      11.715  -6.673-113.954  1.00  0.00           C  
ATOM    130  C   ALA A  18      11.489  -7.899-114.842  1.00  0.00           C  
ATOM    131  O   ALA A  18      12.371  -8.277-115.615  1.00  0.00           O  
ATOM    132  CB  ALA A  18      12.454  -7.069-112.685  1.00  0.00           C  
ATOM    133  N   VAL A  19      10.315  -8.513-114.714  1.00  0.00           N  
ATOM    134  CA  VAL A  19       9.891  -9.589-115.614  1.00  0.00           C  
ATOM    135  C   VAL A  19       9.426  -9.008-116.953  1.00  0.00           C  
ATOM    136  O   VAL A  19       9.852  -9.466-118.017  1.00  0.00           O  
ATOM    137  CB  VAL A  19       8.748 -10.404-114.980  1.00  0.00           C  
ATOM    138  CG1 VAL A  19       8.135 -11.347-116.004  1.00  0.00           C  
ATOM    139  CG2 VAL A  19       9.270 -11.178-113.778  1.00  0.00           C  
ATOM    140  N   ALA A  20       8.565  -7.995-116.894  1.00  0.00           N  
ATOM    141  CA  ALA A  20       7.916  -7.452-118.088  1.00  0.00           C  
ATOM    142  C   ALA A  20       8.930  -6.967-119.130  1.00  0.00           C  
ATOM    143  O   ALA A  20       8.817  -7.298-120.314  1.00  0.00           O  
ATOM    144  CB  ALA A  20       6.975  -6.320-117.700  1.00  0.00           C  
ATOM    145  N   LEU A  21       9.916  -6.191-118.679  1.00  0.00           N  
ATOM    146  CA  LEU A  21      10.860  -5.521-119.573  1.00  0.00           C  
ATOM    147  C   LEU A  21      11.667  -6.492-120.457  1.00  0.00           C  
ATOM    148  O   LEU A  21      11.665  -6.328-121.677  1.00  0.00           O  
ATOM    149  CB  LEU A  21      11.827  -4.667-118.743  1.00  0.00           C  
ATOM    150  CG  LEU A  21      11.232  -3.392-118.131  1.00  0.00           C  
ATOM    151  CD1 LEU A  21      12.231  -2.782-117.157  1.00  0.00           C  
ATOM    152  CD2 LEU A  21      10.882  -2.413-119.241  1.00  0.00           C  
ATOM    153  N   PRO A  22      12.343  -7.491-119.872  1.00  0.00           N  
ATOM    154  CA  PRO A  22      13.102  -8.464-120.671  1.00  0.00           C  
ATOM    155  C   PRO A  22      12.225  -9.401-121.504  1.00  0.00           C  
ATOM    156  O   PRO A  22      12.705  -9.928-122.506  1.00  0.00           O  
ATOM    157  CB  PRO A  22      13.871  -9.241-119.598  1.00  0.00           C  
ATOM    158  CG  PRO A  22      13.019  -9.125-118.381  1.00  0.00           C  
ATOM    159  CD  PRO A  22      12.480  -7.720-118.434  1.00  0.00           C  
ATOM    160  N   ALA A  23      10.973  -9.601-121.092  1.00  0.00           N  
ATOM    161  CA  ALA A  23       9.987 -10.316-121.903  1.00  0.00           C  
ATOM    162  C   ALA A  23       9.688  -9.564-123.200  1.00  0.00           C  
ATOM    163  O   ALA A  23       9.590 -10.174-124.265  1.00  0.00           O  
ATOM    164  CB  ALA A  23       8.709 -10.537-121.107  1.00  0.00           C  
ATOM    165  N   TYR A  24       9.551  -8.242-123.092  1.00  0.00           N  
ATOM    166  CA  TYR A  24       9.359  -7.364-124.245  1.00  0.00           C  
ATOM    167  C   TYR A  24      10.608  -7.352-125.130  1.00  0.00           C  
ATOM    168  O   TYR A  24      10.505  -7.241-126.353  1.00  0.00           O  
ATOM    169  CB  TYR A  24       9.013  -5.945-123.789  1.00  0.00           C  
ATOM    170  CG  TYR A  24       7.601  -5.800-123.264  1.00  0.00           C  
ATOM    171  CD1 TYR A  24       7.382  -5.269-122.001  1.00  0.00           C  
ATOM    172  CD2 TYR A  24       6.527  -6.199-124.045  1.00  0.00           C  
ATOM    173  CE1 TYR A  24       6.093  -5.137-121.522  1.00  0.00           C  
ATOM    174  CE2 TYR A  24       5.238  -6.066-123.566  1.00  0.00           C  
ATOM    175  CZ  TYR A  24       5.020  -5.538-122.310  1.00  0.00           C  
ATOM    176  OH  TYR A  24       3.736  -5.406-121.832  1.00  0.00           O  
ATOM    177  N   GLN A  25      11.779  -7.466-124.502  1.00  0.00           N  
ATOM    178  CA  GLN A  25      13.049  -7.579-125.222  1.00  0.00           C  
ATOM    179  C   GLN A  25      13.188  -8.907-125.964  1.00  0.00           C  
ATOM    180  O   GLN A  25      13.779  -8.956-127.043  1.00  0.00           O  
ATOM    181  CB  GLN A  25      14.222  -7.409-124.253  1.00  0.00           C  
ATOM    182  CG  GLN A  25      14.354  -6.010-123.675  1.00  0.00           C  
ATOM    183  CD  GLN A  25      14.659  -4.971-124.738  1.00  0.00           C  
ATOM    184  NE2 GLN A  25      13.986  -3.829-124.658  1.00  0.00           N  
ATOM    185  OE1 GLN A  25      15.491  -5.193-125.622  1.00  0.00           O  
ATOM    186  N   ASP A  26      12.657  -9.979-125.379  1.00  0.00           N  
ATOM    187  CA  ASP A  26      12.925 -11.247-126.571  1.00  0.00           C  
ATOM    188  C   ASP A  26      11.991 -10.970-127.727  1.00  0.00           C  
ATOM    189  O   ASP A  26      12.315 -11.275-128.869  1.00  0.00           O  
ATOM    190  CB  ASP A  26      12.624 -12.671-126.096  1.00  0.00           C  
ATOM    191  CG  ASP A  26      13.648 -13.191-125.096  1.00  0.00           C  
ATOM    192  OD1 ASP A  26      14.639 -12.530-124.893  1.00  0.00           O  
ATOM    193  OD2 ASP A  26      13.430 -14.244-124.546  1.00  0.00           O1-
ATOM    194  N   TYR A  27      10.836 -10.387-127.437  1.00  0.00           N  
ATOM    195  CA  TYR A  27       9.872 -10.129-128.486  1.00  0.00           C  
ATOM    196  C   TYR A  27      10.597  -9.199-129.432  1.00  0.00           C  
ATOM    197  O   TYR A  27      10.690  -9.439-130.635  1.00  0.00           O  
ATOM    198  CB  TYR A  27       8.577  -9.511-127.954  1.00  0.00           C  
ATOM    199  CG  TYR A  27       7.603  -9.105-129.038  1.00  0.00           C  
ATOM    200  CD1 TYR A  27       6.803 -10.062-129.646  1.00  0.00           C  
ATOM    201  CD2 TYR A  27       7.510  -7.776-129.424  1.00  0.00           C  
ATOM    202  CE1 TYR A  27       5.914  -9.691-130.636  1.00  0.00           C  
ATOM    203  CE2 TYR A  27       6.621  -7.405-130.414  1.00  0.00           C  
ATOM    204  CZ  TYR A  27       5.826  -8.357-131.019  1.00  0.00           C  
ATOM    205  OH  TYR A  27       4.940  -7.988-132.005  1.00  0.00           O  
ATOM    206  N   THR A  28      11.127  -8.136-128.853  1.00  0.00           N  
ATOM    207  CA  THR A  28      11.775  -7.092-129.610  1.00  0.00           C  
ATOM    208  C   THR A  28      12.869  -7.626-130.530  1.00  0.00           C  
ATOM    209  O   THR A  28      12.974  -7.211-131.686  1.00  0.00           O  
ATOM    210  CB  THR A  28      12.369  -6.032-128.664  1.00  0.00           C  
ATOM    211  CG2 THR A  28      13.115  -4.969-129.455  1.00  0.00           C  
ATOM    212  OG1 THR A  28      11.316  -5.414-127.913  1.00  0.00           O  
ATOM    213  N   ALA A  29      13.683  -8.545-130.028  1.00  0.00           N  
ATOM    214  CA  ALA A  29      14.765  -9.125-130.823  1.00  0.00           C  
ATOM    215  C   ALA A  29      14.246  -9.637-132.152  1.00  0.00           C  
ATOM    216  O   ALA A  29      14.796  -9.337-133.210  1.00  0.00           O  
ATOM    217  CB  ALA A  29      15.453 -10.245-130.056  1.00  0.00           C  
ATOM    218  N   ARG A  30      13.178 -10.418-132.073  1.00  0.00           N  
ATOM    219  CA  ARG A  30      12.542 -11.008-133.231  1.00  0.00           C  
ATOM    220  C   ARG A  30      11.950  -9.907-134.080  1.00  0.00           C  
ATOM    221  O   ARG A  30      12.036  -9.949-135.300  1.00  0.00           O  
ATOM    222  CB  ARG A  30      11.454 -11.990-132.822  1.00  0.00           C  
ATOM    223  CG  ARG A  30      10.809 -12.746-133.973  1.00  0.00           C  
ATOM    224  CD  ARG A  30       9.845 -13.766-133.487  1.00  0.00           C  
ATOM    225  NE  ARG A  30      10.489 -14.768-132.653  1.00  0.00           N  
ATOM    226  CZ  ARG A  30       9.880 -15.441-131.658  1.00  0.00           C  
ATOM    227  NH1 ARG A  30       8.615 -15.209-131.385  1.00  0.00           N1+
ATOM    228  NH2 ARG A  30      10.554 -16.335-130.955  1.00  0.00           N  
ATOM    229  N   ALA A  31      11.350  -8.919-133.423  1.00  0.00           N  
ATOM    230  CA  ALA A  31      10.730  -7.791-134.121  1.00  0.00           C  
ATOM    231  C   ALA A  31      11.760  -7.033-134.965  1.00  0.00           C  
ATOM    232  O   ALA A  31      11.468  -6.596-136.077  1.00  0.00           O  
ATOM    233  CB  ALA A  31      10.061  -6.853-133.127  1.00  0.00           C  
ATOM    234  N   GLN A  32      12.967  -6.902-134.419  1.00  0.00           N  
ATOM    235  CA  GLN A  32      14.095  -6.284-135.109  1.00  0.00           C  
ATOM    236  C   GLN A  32      14.463  -7.062-136.373  1.00  0.00           C  
ATOM    237  O   GLN A  32      14.771  -6.475-137.411  1.00  0.00           O  
ATOM    238  CB  GLN A  32      15.306  -6.192-134.178  1.00  0.00           C  
ATOM    239  CG  GLN A  32      15.139  -5.207-133.033  1.00  0.00           C  
ATOM    240  CD  GLN A  32      16.351  -5.167-132.122  1.00  0.00           C  
ATOM    241  NE2 GLN A  32      16.524  -4.055-131.417  1.00  0.00           N  
ATOM    242  OE1 GLN A  32      17.125  -6.127-132.052  1.00  0.00           O  
ATOM    243  N   VAL A  33      14.457  -8.383-136.274  1.00  0.00           N  
ATOM    244  CA  VAL A  33      14.746  -9.225-137.418  1.00  0.00           C  
ATOM    245  C   VAL A  33      13.659  -9.016-138.456  1.00  0.00           C  
ATOM    246  O   VAL A  33      13.938  -8.899-139.649  1.00  0.00           O  
ATOM    247  CB  VAL A  33      14.808 -10.709-137.010  1.00  0.00           C  
ATOM    248  CG1 VAL A  33      14.907 -11.597-138.241  1.00  0.00           C  
ATOM    249  CG2 VAL A  33      15.990 -10.942-136.081  1.00  0.00           C  
ATOM    250  N   SER A  34      12.414  -8.965-137.995  1.00  0.00           N  
ATOM    251  CA  SER A  34      11.282  -8.892-138.903  1.00  0.00           C  
ATOM    252  C   SER A  34      11.318  -7.616-139.723  1.00  0.00           C  
ATOM    253  O   SER A  34      10.828  -7.577-140.855  1.00  0.00           O  
ATOM    254  CB  SER A  34       9.983  -8.968-138.125  1.00  0.00           C  
ATOM    255  OG  SER A  34       9.759  -7.787-137.405  1.00  0.00           O  
ATOM    256  N   GLU A  35      11.894  -6.570-139.148  1.00  0.00           N  
ATOM    257  CA  GLU A  35      12.127  -5.350-139.899  1.00  0.00           C  
ATOM    258  C   GLU A  35      13.056  -5.594-141.053  1.00  0.00           C  
ATOM    259  O   GLU A  35      12.807  -5.132-142.164  1.00  0.00           O  
ATOM    260  CB  GLU A  35      12.706  -4.261-138.994  1.00  0.00           C  
ATOM    261  CG  GLU A  35      12.904  -2.915-139.677  1.00  0.00           C  
ATOM    262  CD  GLU A  35      13.509  -1.881-138.768  1.00  0.00           C  
ATOM    263  OE1 GLU A  35      14.341  -2.236-137.967  1.00  0.00           O  
ATOM    264  OE2 GLU A  35      13.141  -0.736-138.876  1.00  0.00           O1-
ATOM    265  N   ALA A  36      14.135  -6.315-140.790  1.00  0.00           N  
ATOM    266  CA  ALA A  36      15.132  -6.532-141.815  1.00  0.00           C  
ATOM    267  C   ALA A  36      14.381  -7.255-142.923  1.00  0.00           C  
ATOM    268  O   ALA A  36      14.516  -6.938-144.107  1.00  0.00           O  
ATOM    269  CB  ALA A  36      16.320  -7.333-141.301  1.00  0.00           C  
ATOM    270  N   ILE A  37      13.560  -8.216-142.517  1.00  0.00           N  
ATOM    271  CA  ILE A  37      12.829  -9.035-143.457  1.00  0.00           C  
ATOM    272  C   ILE A  37      11.879  -8.203-144.308  1.00  0.00           C  
ATOM    273  O   ILE A  37      11.864  -8.330-145.534  1.00  0.00           O  
ATOM    274  CB  ILE A  37      12.035 -10.129-142.719  1.00  0.00           C  
ATOM    275  CG1 ILE A  37      12.989 -11.149-142.092  1.00  0.00           C  
ATOM    276  CG2 ILE A  37      11.066 -10.816-143.669  1.00  0.00           C  
ATOM    277  CD1 ILE A  37      12.317 -12.104-141.132  1.00  0.00           C  
ATOM    278  N   LEU A  38      11.092  -7.348-143.672  1.00  0.00           N  
ATOM    279  CA  LEU A  38      10.063  -6.620-144.408  1.00  0.00           C  
ATOM    280  C   LEU A  38      10.702  -5.629-145.355  1.00  0.00           C  
ATOM    281  O   LEU A  38      10.130  -5.281-146.387  1.00  0.00           O  
ATOM    282  CB  LEU A  38       9.125  -5.884-143.442  1.00  0.00           C  
ATOM    283  CG  LEU A  38       8.215  -6.777-142.589  1.00  0.00           C  
ATOM    284  CD1 LEU A  38       7.375  -5.909-141.662  1.00  0.00           C  
ATOM    285  CD2 LEU A  38       7.333  -7.621-143.497  1.00  0.00           C  
ATOM    286  N   LEU A  39      11.900  -5.183-145.003  1.00  0.00           N  
ATOM    287  CA  LEU A  39      12.666  -4.337-145.894  1.00  0.00           C  
ATOM    288  C   LEU A  39      13.106  -5.145-147.106  1.00  0.00           C  
ATOM    289  O   LEU A  39      13.162  -4.637-148.224  1.00  0.00           O  
ATOM    290  CB  LEU A  39      13.888  -3.757-145.170  1.00  0.00           C  
ATOM    291  CG  LEU A  39      13.586  -2.706-144.094  1.00  0.00           C  
ATOM    292  CD1 LEU A  39      14.848  -2.429-143.288  1.00  0.00           C  
ATOM    293  CD2 LEU A  39      13.069  -1.437-144.755  1.00  0.00           C  
ATOM    294  N   ALA A  40      13.422  -6.411-146.872  1.00  0.00           N  
ATOM    295  CA  ALA A  40      13.872  -7.283-147.937  1.00  0.00           C  
ATOM    296  C   ALA A  40      12.672  -7.615-148.810  1.00  0.00           C  
ATOM    297  O   ALA A  40      12.796  -7.789-150.024  1.00  0.00           O  
ATOM    298  CB  ALA A  40      14.521  -8.542-147.382  1.00  0.00           C  
ATOM    299  N   GLU A  41      11.507  -7.694-148.192  1.00  0.00           N  
ATOM    300  CA  GLU A  41      10.283  -8.001-148.921  1.00  0.00           C  
ATOM    301  C   GLU A  41      10.051  -6.901-149.955  1.00  0.00           C  
ATOM    302  O   GLU A  41      10.240  -5.718-149.658  1.00  0.00           O  
ATOM    303  CB  GLU A  41       9.088  -8.111-147.972  1.00  0.00           C  
ATOM    304  CG  GLU A  41       9.170  -9.268-146.987  1.00  0.00           C  
ATOM    305  CD  GLU A  41       9.081 -10.612-147.655  1.00  0.00           C  
ATOM    306  OE1 GLU A  41       8.133 -10.838-148.368  1.00  0.00           O  
ATOM    307  OE2 GLU A  41       9.963 -11.413-147.452  1.00  0.00           O1-
ATOM    308  N   GLY A  42       9.635  -7.276-151.161  1.00  0.00           N  
ATOM    309  CA  GLY A  42       9.442  -6.279-152.208  1.00  0.00           C  
ATOM    310  C   GLY A  42      10.527  -6.410-153.262  1.00  0.00           C  
ATOM    311  O   GLY A  42      10.399  -5.980-154.414  1.00  0.00           O  
ATOM    312  N   GLN A  43      11.625  -7.004-152.817  1.00  0.00           N  
ATOM    313  CA  GLN A  43      12.775  -7.230-153.648  1.00  0.00           C  
ATOM    314  C   GLN A  43      12.448  -8.528-154.353  1.00  0.00           C  
ATOM    315  O   GLN A  43      13.014  -8.869-155.377  1.00  0.00           O  
ATOM    316  CB  GLN A  43      14.072  -7.326-152.841  1.00  0.00           C  
ATOM    317  CG  GLN A  43      14.423  -6.062-152.075  1.00  0.00           C  
ATOM    318  CD  GLN A  43      14.621  -4.867-152.989  1.00  0.00           C  
ATOM    319  NE2 GLN A  43      13.985  -3.752-152.649  1.00  0.00           N  
ATOM    320  OE1 GLN A  43      15.339  -4.946-153.989  1.00  0.00           O  
ATOM    321  N   LYS A  44      11.487  -9.233-153.782  1.00  0.00           N  
ATOM    322  CA  LYS A  44      11.019 -10.475-154.342  1.00  0.00           C  
ATOM    323  C   LYS A  44      10.490 -10.085-155.703  1.00  0.00           C  
ATOM    324  O   LYS A  44      10.790 -10.725-156.701  1.00  0.00           O  
ATOM    325  CB  LYS A  44       9.945 -11.138-153.478  1.00  0.00           C  
ATOM    326  CG  LYS A  44      10.466 -11.742-152.180  1.00  0.00           C  
ATOM    327  CD  LYS A  44       9.338 -12.361-151.368  1.00  0.00           C  
ATOM    328  CE  LYS A  44       9.874 -13.108-150.155  1.00  0.00           C  
ATOM    329  NZ  LYS A  44       8.785 -13.522-149.230  1.00  0.00           N1+
ATOM    330  N   SER A  45       9.731  -8.996-155.727  1.00  0.00           N  
ATOM    331  CA  SER A  45       9.094  -8.502-156.941  1.00  0.00           C  
ATOM    332  C   SER A  45      10.118  -7.997-157.942  1.00  0.00           C  
ATOM    333  O   SER A  45      10.087  -8.364-159.114  1.00  0.00           O  
ATOM    334  CB  SER A  45       8.119  -7.392-156.602  1.00  0.00           C  
ATOM    335  OG  SER A  45       7.503  -6.895-157.758  1.00  0.00           O  
ATOM    336  N   ALA A  46      11.019  -7.146-157.480  1.00  0.00           N  
ATOM    337  CA  ALA A  46      12.007  -6.570-158.371  1.00  0.00           C  
ATOM    338  C   ALA A  46      12.835  -7.680-159.019  1.00  0.00           C  
ATOM    339  O   ALA A  46      13.069  -7.676-160.228  1.00  0.00           O  
ATOM    340  CB  ALA A  46      12.898  -5.592-157.618  1.00  0.00           C  
ATOM    341  N   VAL A  47      13.263  -8.633-158.207  1.00  0.00           N  
ATOM    342  CA  VAL A  47      14.059  -9.745-158.697  1.00  0.00           C  
ATOM    343  C   VAL A  47      13.305 -10.701-159.610  1.00  0.00           C  
ATOM    344  O   VAL A  47      13.844 -11.152-160.613  1.00  0.00           O  
ATOM    345  CB  VAL A  47      14.617 -10.541-157.502  1.00  0.00           C  
ATOM    346  CG1 VAL A  47      15.252 -11.839-157.977  1.00  0.00           C  
ATOM    347  CG2 VAL A  47      15.625  -9.694-156.741  1.00  0.00           C  
ATOM    348  N   THR A  48      12.069 -11.017-159.261  1.00  0.00           N  
ATOM    349  CA  THR A  48      11.283 -11.941-160.063  1.00  0.00           C  
ATOM    350  C   THR A  48      11.047 -11.356-161.447  1.00  0.00           C  
ATOM    351  O   THR A  48      11.181 -12.027-162.465  1.00  0.00           O  
ATOM    352  CB  THR A  48       9.935 -12.263-159.391  1.00  0.00           C  
ATOM    353  CG2 THR A  48       9.126 -13.221-160.252  1.00  0.00           C  
ATOM    354  OG1 THR A  48      10.168 -12.860-158.109  1.00  0.00           O  
ATOM    355  N   GLU A  49      10.684 -10.086-161.474  1.00  0.00           N  
ATOM    356  CA  GLU A  49      10.444  -9.439-162.736  1.00  0.00           C  
ATOM    357  C   GLU A  49      11.712  -9.488-163.585  1.00  0.00           C  
ATOM    358  O   GLU A  49      11.664  -9.904-164.745  1.00  0.00           O  
ATOM    359  CB  GLU A  49       9.996  -7.992-162.522  1.00  0.00           C  
ATOM    360  CG  GLU A  49       9.695  -7.230-163.804  1.00  0.00           C  
ATOM    361  CD  GLU A  49       9.269  -5.810-163.555  1.00  0.00           C  
ATOM    362  OE1 GLU A  49       9.120  -5.446-162.413  1.00  0.00           O  
ATOM    363  OE2 GLU A  49       9.091  -5.088-164.508  1.00  0.00           O1-
ATOM    364  N   TYR A  50      12.851  -9.105-163.007  1.00  0.00           N  
ATOM    365  CA  TYR A  50      14.084  -9.174-163.782  1.00  0.00           C  
ATOM    366  C   TYR A  50      14.350 -10.583-164.305  1.00  0.00           C  
ATOM    367  O   TYR A  50      14.595 -10.760-165.491  1.00  0.00           O  
ATOM    368  CB  TYR A  50      15.267  -8.694-162.937  1.00  0.00           C  
ATOM    369  CG  TYR A  50      16.584  -8.685-163.681  1.00  0.00           C  
ATOM    370  CD1 TYR A  50      17.041  -7.514-164.268  1.00  0.00           C  
ATOM    371  CD2 TYR A  50      17.335  -9.847-163.775  1.00  0.00           C  
ATOM    372  CE1 TYR A  50      18.244  -7.506-164.947  1.00  0.00           C  
ATOM    373  CE2 TYR A  50      18.538  -9.839-164.454  1.00  0.00           C  
ATOM    374  CZ  TYR A  50      18.992  -8.674-165.038  1.00  0.00           C  
ATOM    375  OH  TYR A  50      20.191  -8.666-165.715  1.00  0.00           O  
ATOM    376  N   TYR A  51      14.291 -11.579-163.426  1.00  0.00           N  
ATOM    377  CA  TYR A  51      14.571 -12.954-163.834  1.00  0.00           C  
ATOM    378  C   TYR A  51      13.644 -13.479-164.952  1.00  0.00           C  
ATOM    379  O   TYR A  51      14.110 -14.093-165.918  1.00  0.00           O  
ATOM    380  CB  TYR A  51      14.485 -13.873-162.614  1.00  0.00           C  
ATOM    381  CG  TYR A  51      14.764 -15.327-162.924  1.00  0.00           C  
ATOM    382  CD1 TYR A  51      16.063 -15.747-163.170  1.00  0.00           C  
ATOM    383  CD2 TYR A  51      13.721 -16.241-162.962  1.00  0.00           C  
ATOM    384  CE1 TYR A  51      16.318 -17.075-163.454  1.00  0.00           C  
ATOM    385  CE2 TYR A  51      13.976 -17.569-163.245  1.00  0.00           C  
ATOM    386  CZ  TYR A  51      15.268 -17.986-163.490  1.00  0.00           C  
ATOM    387  OH  TYR A  51      15.522 -19.309-163.772  1.00  0.00           O  
ATOM    388  N   LEU A  52      12.339 -13.258-164.808  1.00  0.00           N  
ATOM    389  CA  LEU A  52      11.382 -13.698-165.821  1.00  0.00           C  
ATOM    390  C   LEU A  52      11.544 -12.966-167.157  1.00  0.00           C  
ATOM    391  O   LEU A  52      11.288 -13.533-168.217  1.00  0.00           O  
ATOM    392  CB  LEU A  52       9.953 -13.498-165.302  1.00  0.00           C  
ATOM    393  CG  LEU A  52       9.534 -14.408-164.141  1.00  0.00           C  
ATOM    394  CD1 LEU A  52       8.128 -14.039-163.687  1.00  0.00           C  
ATOM    395  CD2 LEU A  52       9.600 -15.862-164.585  1.00  0.00           C  
ATOM    396  N   ASN A  53      11.983 -11.715-167.114  1.00  0.00           N  
ATOM    397  CA  ASN A  53      12.174 -10.976-168.357  1.00  0.00           C  
ATOM    398  C   ASN A  53      13.546 -11.217-168.985  1.00  0.00           C  
ATOM    399  O   ASN A  53      13.715 -11.007-170.180  1.00  0.00           O  
ATOM    400  CB  ASN A  53      11.958  -9.493-168.118  1.00  0.00           C  
ATOM    401  CG  ASN A  53      10.519  -9.155-167.844  1.00  0.00           C  
ATOM    402  ND2 ASN A  53      10.296  -8.077-167.136  1.00  0.00           N  
ATOM    403  OD1 ASN A  53       9.607  -9.872-168.273  1.00  0.00           O  
ATOM    404  N   HIS A  54      14.520 -11.666-168.198  1.00  0.00           N  
ATOM    405  CA  HIS A  54      15.867 -11.851-168.725  1.00  0.00           C  
ATOM    406  C   HIS A  54      16.436 -13.267-168.717  1.00  0.00           C  
ATOM    407  O   HIS A  54      17.184 -13.635-169.617  1.00  0.00           O  
ATOM    408  CB  HIS A  54      16.830 -10.945-167.952  1.00  0.00           C  
ATOM    409  CG  HIS A  54      16.576  -9.483-168.156  1.00  0.00           C  
ATOM    410  CD2 HIS A  54      15.936  -8.573-167.385  1.00  0.00           C  
ATOM    411  ND1 HIS A  54      17.008  -8.803-169.275  1.00  0.00           N  
ATOM    412  CE1 HIS A  54      16.643  -7.536-169.183  1.00  0.00           C  
ATOM    413  NE2 HIS A  54      15.993  -7.371-168.046  1.00  0.00           N  
ATOM    414  N   GLY A  55      16.093 -14.060-167.710  1.00  0.00           N  
ATOM    415  CA  GLY A  55      16.581 -15.425-167.680  1.00  0.00           C  
ATOM    416  C   GLY A  55      17.736 -15.611-166.715  1.00  0.00           C  
ATOM    417  O   GLY A  55      18.114 -16.736-166.420  1.00  0.00           O  
ATOM    418  N   LYS A  56      18.310 -14.504-166.252  1.00  0.00           N  
ATOM    419  CA  LYS A  56      19.437 -14.514-165.318  1.00  0.00           C  
ATOM    420  C   LYS A  56      18.996 -13.711-164.097  1.00  0.00           C  
ATOM    421  O   LYS A  56      17.988 -13.005-164.164  1.00  0.00           O  
ATOM    422  CB  LYS A  56      20.701 -13.922-165.944  1.00  0.00           C  
ATOM    423  CG  LYS A  56      21.254 -14.719-167.118  1.00  0.00           C  
ATOM    424  CD  LYS A  56      21.801 -16.064-166.663  1.00  0.00           C  
ATOM    425  CE  LYS A  56      22.369 -16.855-167.832  1.00  0.00           C  
ATOM    426  NZ  LYS A  56      22.943 -18.157-167.397  1.00  0.00           N1+
ATOM    427  N   TRP A  57      19.718 -13.837-162.983  1.00  0.00           N  
ATOM    428  CA  TRP A  57      19.309 -13.187-161.739  1.00  0.00           C  
ATOM    429  C   TRP A  57      19.993 -11.847-161.604  1.00  0.00           C  
ATOM    430  O   TRP A  57      21.102 -11.662-162.101  1.00  0.00           O  
ATOM    431  CB  TRP A  57      19.646 -14.060-160.529  1.00  0.00           C  
ATOM    432  CG  TRP A  57      18.915 -15.368-160.512  1.00  0.00           C  
ATOM    433  CD1 TRP A  57      19.352 -16.553-161.025  1.00  0.00           C  
ATOM    434  CD2 TRP A  57      17.607 -15.633-159.951  1.00  0.00           C  
ATOM    435  CE2 TRP A  57      17.337 -16.987-160.167  1.00  0.00           C  
ATOM    436  CE3 TRP A  57      16.658 -14.841-159.292  1.00  0.00           C  
ATOM    437  NE1 TRP A  57      18.411 -17.531-160.824  1.00  0.00           N  
ATOM    438  CZ2 TRP A  57      16.153 -17.574-159.750  1.00  0.00           C  
ATOM    439  CZ3 TRP A  57      15.472 -15.430-158.872  1.00  0.00           C  
ATOM    440  CH2 TRP A  57      15.226 -16.762-159.095  1.00  0.00           C  
ATOM    441  N   PRO A  58      19.344 -10.879-160.933  1.00  0.00           N  
ATOM    442  CA  PRO A  58      19.971  -9.561-160.754  1.00  0.00           C  
ATOM    443  C   PRO A  58      21.323  -9.679-160.062  1.00  0.00           C  
ATOM    444  O   PRO A  58      21.423 -10.259-158.983  1.00  0.00           O  
ATOM    445  CB  PRO A  58      18.959  -8.810-159.883  1.00  0.00           C  
ATOM    446  CG  PRO A  58      17.655  -9.463-160.191  1.00  0.00           C  
ATOM    447  CD  PRO A  58      17.995 -10.921-160.351  1.00  0.00           C  
ATOM    448  N   GLU A  59      22.363  -9.134-160.687  1.00  0.00           N  
ATOM    449  CA  GLU A  59      23.691  -9.120-160.072  1.00  0.00           C  
ATOM    450  C   GLU A  59      23.870  -8.099-158.965  1.00  0.00           C  
ATOM    451  O   GLU A  59      24.676  -8.309-158.064  1.00  0.00           O  
ATOM    452  CB  GLU A  59      24.750  -8.869-161.148  1.00  0.00           C  
ATOM    453  CG  GLU A  59      24.910 -10.004-162.149  1.00  0.00           C  
ATOM    454  CD  GLU A  59      25.939  -9.712-163.205  1.00  0.00           C  
ATOM    455  OE1 GLU A  59      26.423  -8.606-163.247  1.00  0.00           O  
ATOM    456  OE2 GLU A  59      26.242 -10.595-163.972  1.00  0.00           O1-
ATOM    457  N   ASN A  60      23.132  -7.000-159.046  1.00  0.00           N  
ATOM    458  CA  ASN A  60      23.161  -5.982-158.003  1.00  0.00           C  
ATOM    459  C   ASN A  60      21.867  -5.182-157.974  1.00  0.00           C  
ATOM    460  O   ASN A  60      20.973  -5.408-158.787  1.00  0.00           O  
ATOM    461  CB  ASN A  60      24.352  -5.061-158.190  1.00  0.00           C  
ATOM    462  CG  ASN A  60      24.343  -4.368-159.525  1.00  0.00           C  
ATOM    463  ND2 ASN A  60      25.503  -4.209-160.109  1.00  0.00           N  
ATOM    464  OD1 ASN A  60      23.283  -3.975-160.026  1.00  0.00           O  
ATOM    465  N   ASN A  61      21.765  -4.243-157.038  1.00  0.00           N  
ATOM    466  CA  ASN A  61      20.569  -3.418-156.913  1.00  0.00           C  
ATOM    467  C   ASN A  61      20.209  -2.599-158.146  1.00  0.00           C  
ATOM    468  O   ASN A  61      19.022  -2.418-158.464  1.00  0.00           O  
ATOM    469  CB  ASN A  61      20.718  -2.495-155.717  1.00  0.00           C  
ATOM    470  CG  ASN A  61      20.680  -3.235-154.409  1.00  0.00           C  
ATOM    471  ND2 ASN A  61      20.643  -2.502-153.325  1.00  0.00           N  
ATOM    472  OD1 ASN A  61      20.683  -4.471-154.380  1.00  0.00           O  
ATOM    473  N   THR A  62      21.232  -2.096-158.833  1.00  0.00           N  
ATOM    474  CA  THR A  62      21.028  -1.331-160.053  1.00  0.00           C  
ATOM    475  C   THR A  62      20.408  -2.197-161.130  1.00  0.00           C  
ATOM    476  O   THR A  62      19.550  -1.749-161.878  1.00  0.00           O  
ATOM    477  CB  THR A  62      22.352  -0.733-160.565  1.00  0.00           C  
ATOM    478  CG2 THR A  62      22.125   0.031-161.861  1.00  0.00           C  
ATOM    479  OG1 THR A  62      22.891   0.156-159.579  1.00  0.00           O  
ATOM    480  N   SER A  63      20.837  -3.448-161.203  1.00  0.00           N  
ATOM    481  CA  SER A  63      20.288  -4.350-162.197  1.00  0.00           C  
ATOM    482  C   SER A  63      18.876  -4.721-161.796  1.00  0.00           C  
ATOM    483  O   SER A  63      18.026  -4.956-162.651  1.00  0.00           O  
ATOM    484  CB  SER A  63      21.145  -5.594-162.328  1.00  0.00           C  
ATOM    485  OG  SER A  63      21.080  -6.373-161.165  1.00  0.00           O  
ATOM    486  N   ALA A  64      18.627  -4.780-160.488  1.00  0.00           N  
ATOM    487  CA  ALA A  64      17.286  -5.066-159.986  1.00  0.00           C  
ATOM    488  C   ALA A  64      16.325  -3.925-160.293  1.00  0.00           C  
ATOM    489  O   ALA A  64      15.149  -4.142-160.585  1.00  0.00           O  
ATOM    490  CB  ALA A  64      17.328  -5.339-158.490  1.00  0.00           C  
ATOM    491  N   GLY A  65      16.839  -2.709-160.239  1.00  0.00           N  
ATOM    492  CA  GLY A  65      16.013  -1.559-160.546  1.00  0.00           C  
ATOM    493  C   GLY A  65      15.514  -0.915-159.271  1.00  0.00           C  
ATOM    494  O   GLY A  65      14.434  -0.311-159.250  1.00  0.00           O  
ATOM    495  N   VAL A  66      16.286  -1.063-158.199  1.00  0.00           N  
ATOM    496  CA  VAL A  66      15.905  -0.533-156.897  1.00  0.00           C  
ATOM    497  C   VAL A  66      17.033   0.357-156.432  1.00  0.00           C  
ATOM    498  O   VAL A  66      18.018   0.531-157.151  1.00  0.00           O  
ATOM    499  CB  VAL A  66      15.662  -1.660-155.876  1.00  0.00           C  
ATOM    500  CG1 VAL A  66      14.538  -2.571-156.346  1.00  0.00           C  
ATOM    501  CG2 VAL A  66      16.943  -2.451-155.663  1.00  0.00           C  
ATOM    502  N   ALA A  67      16.889   0.918-155.236  1.00  0.00           N  
ATOM    503  CA  ALA A  67      17.903   1.798-154.672  1.00  0.00           C  
ATOM    504  C   ALA A  67      19.262   1.126-154.801  1.00  0.00           C  
ATOM    505  O   ALA A  67      19.524   0.086-154.195  1.00  0.00           O  
ATOM    506  CB  ALA A  67      17.591   2.131-153.220  1.00  0.00           C  
ATOM    507  N   SER A  68      20.114   1.723-155.622  1.00  0.00           N  
ATOM    508  CA  SER A  68      21.374   1.110-156.016  1.00  0.00           C  
ATOM    509  C   SER A  68      22.254   0.767-154.829  1.00  0.00           C  
ATOM    510  O   SER A  68      22.883  -0.277-154.805  1.00  0.00           O  
ATOM    511  CB  SER A  68      22.126   2.039-156.949  1.00  0.00           C  
ATOM    512  OG  SER A  68      21.442   2.193-158.163  1.00  0.00           O  
ATOM    513  N   SER A  69      22.284   1.650-153.839  1.00  0.00           N  
ATOM    514  CA  SER A  69      23.093   1.429-152.648  1.00  0.00           C  
ATOM    515  C   SER A  69      22.336   0.601-151.599  1.00  0.00           C  
ATOM    516  O   SER A  69      21.198   0.919-151.256  1.00  0.00           O  
ATOM    517  CB  SER A  69      23.511   2.761-152.055  1.00  0.00           C  
ATOM    518  OG  SER A  69      24.308   2.576-150.917  1.00  0.00           O  
ATOM    519  N   PRO A  70      22.954  -0.481-151.083  1.00  0.00           N  
ATOM    520  CA  PRO A  70      22.331  -1.305-150.037  1.00  0.00           C  
ATOM    521  C   PRO A  70      21.921  -0.465-148.838  1.00  0.00           C  
ATOM    522  O   PRO A  70      20.939  -0.757-148.157  1.00  0.00           O  
ATOM    523  CB  PRO A  70      23.438  -2.298-149.671  1.00  0.00           C  
ATOM    524  CG  PRO A  70      24.254  -2.410-150.913  1.00  0.00           C  
ATOM    525  CD  PRO A  70      24.279  -1.013-151.472  1.00  0.00           C  
ATOM    526  N   THR A  71      22.692   0.592-148.604  1.00  0.00           N  
ATOM    527  CA  THR A  71      22.494   1.489-147.472  1.00  0.00           C  
ATOM    528  C   THR A  71      21.233   2.330-147.600  1.00  0.00           C  
ATOM    529  O   THR A  71      20.785   2.941-146.637  1.00  0.00           O  
ATOM    530  CB  THR A  71      23.707   2.421-147.298  1.00  0.00           C  
ATOM    531  CG2 THR A  71      24.986   1.610-147.150  1.00  0.00           C  
ATOM    532  OG1 THR A  71      23.821   3.280-148.440  1.00  0.00           O  
ATOM    533  N   ASP A  72      20.657   2.376-148.785  1.00  0.00           N  
ATOM    534  CA  ASP A  72      19.426   3.122-148.959  1.00  0.00           C  
ATOM    535  C   ASP A  72      18.219   2.241-148.645  1.00  0.00           C  
ATOM    536  O   ASP A  72      17.075   2.701-148.696  1.00  0.00           O  
ATOM    537  CB  ASP A  72      19.323   3.664-150.387  1.00  0.00           C  
ATOM    538  CG  ASP A  72      20.367   4.730-150.693  1.00  0.00           C  
ATOM    539  OD1 ASP A  72      20.866   5.327-149.769  1.00  0.00           O  
ATOM    540  OD2 ASP A  72      20.654   4.937-151.848  1.00  0.00           O1-
ATOM    541  N   ILE A  73      18.479   0.977-148.314  1.00  0.00           N  
ATOM    542  CA  ILE A  73      17.429   0.056-147.885  1.00  0.00           C  
ATOM    543  C   ILE A  73      17.689  -0.367-146.441  1.00  0.00           C  
ATOM    544  O   ILE A  73      18.037  -1.515-146.153  1.00  0.00           O  
ATOM    545  CB  ILE A  73      17.363  -1.185-148.793  1.00  0.00           C  
ATOM    546  CG1 ILE A  73      17.187  -0.768-150.256  1.00  0.00           C  
ATOM    547  CG2 ILE A  73      16.231  -2.103-148.359  1.00  0.00           C  
ATOM    548  CD1 ILE A  73      17.324  -1.910-151.237  1.00  0.00           C  
ATOM    549  N   LYS A  74      17.507   0.584-145.533  1.00  0.00           N  
ATOM    550  CA  LYS A  74      17.815   0.373-144.132  1.00  0.00           C  
ATOM    551  C   LYS A  74      16.611   0.620-143.241  1.00  0.00           C  
ATOM    552  O   LYS A  74      15.590   1.159-143.677  1.00  0.00           O  
ATOM    553  CB  LYS A  74      18.974   1.275-143.704  1.00  0.00           C  
ATOM    554  CG  LYS A  74      18.676   2.766-143.789  1.00  0.00           C  
ATOM    555  CD  LYS A  74      19.883   3.595-143.378  1.00  0.00           C  
ATOM    556  CE  LYS A  74      19.569   5.084-143.406  1.00  0.00           C  
ATOM    557  NZ  LYS A  74      20.741   5.908-143.006  1.00  0.00           N1+
ATOM    558  N   GLY A  75      16.751   0.217-141.986  1.00  0.00           N  
ATOM    559  CA  GLY A  75      15.678   0.354-141.031  1.00  0.00           C  
ATOM    560  C   GLY A  75      16.155   1.050-139.773  1.00  0.00           C  
ATOM    561  O   GLY A  75      17.229   1.655-139.745  1.00  0.00           O  
ATOM    562  N   LYS A  76      15.349   0.959-138.726  1.00  0.00           N  
ATOM    563  CA  LYS A  76      15.678   1.514-137.420  1.00  0.00           C  
ATOM    564  C   LYS A  76      16.787   0.701-136.767  1.00  0.00           C  
ATOM    565  O   LYS A  76      17.678   1.245-136.116  1.00  0.00           O  
ATOM    566  CB  LYS A  76      14.442   1.549-136.519  1.00  0.00           C  
ATOM    567  CG  LYS A  76      14.649   2.271-135.195  1.00  0.00           C  
ATOM    568  CD  LYS A  76      13.340   2.419-134.435  1.00  0.00           C  
ATOM    569  CE  LYS A  76      13.479   3.394-133.275  1.00  0.00           C  
ATOM    570  NZ  LYS A  76      14.473   2.927-132.272  1.00  0.00           N1+
ATOM    571  N   TYR A  77      16.720  -0.611-136.948  1.00  0.00           N  
ATOM    572  CA  TYR A  77      17.652  -1.522-136.310  1.00  0.00           C  
ATOM    573  C   TYR A  77      18.385  -2.295-137.388  1.00  0.00           C  
ATOM    574  O   TYR A  77      19.174  -3.195-137.099  1.00  0.00           O  
ATOM    575  CB  TYR A  77      16.931  -2.470-135.350  1.00  0.00           C  
ATOM    576  CG  TYR A  77      16.131  -1.763-134.279  1.00  0.00           C  
ATOM    577  CD1 TYR A  77      14.747  -1.724-134.359  1.00  0.00           C  
ATOM    578  CD2 TYR A  77      16.781  -1.153-133.217  1.00  0.00           C  
ATOM    579  CE1 TYR A  77      14.016  -1.078-133.381  1.00  0.00           C  
ATOM    580  CE2 TYR A  77      16.051  -0.507-132.238  1.00  0.00           C  
ATOM    581  CZ  TYR A  77      14.674  -0.468-132.318  1.00  0.00           C  
ATOM    582  OH  TYR A  77      13.946   0.175-131.344  1.00  0.00           O  
ATOM    583  N   VAL A  78      18.111  -1.939-138.638  1.00  0.00           N  
ATOM    584  CA  VAL A  78      18.629  -2.688-139.763  1.00  0.00           C  
ATOM    585  C   VAL A  78      19.663  -1.892-140.520  1.00  0.00           C  
ATOM    586  O   VAL A  78      19.439  -0.744-140.876  1.00  0.00           O  
ATOM    587  CB  VAL A  78      17.486  -3.078-140.719  1.00  0.00           C  
ATOM    588  CG1 VAL A  78      18.031  -3.837-141.919  1.00  0.00           C  
ATOM    589  CG2 VAL A  78      16.452  -3.911-139.977  1.00  0.00           C  
ATOM    590  N   LYS A  79      20.805  -2.520-140.758  1.00  0.00           N  
ATOM    591  CA  LYS A  79      21.919  -1.853-141.412  1.00  0.00           C  
ATOM    592  C   LYS A  79      21.629  -1.655-142.895  1.00  0.00           C  
ATOM    593  O   LYS A  79      21.587  -0.519-143.374  1.00  0.00           O  
ATOM    594  CB  LYS A  79      23.210  -2.653-141.226  1.00  0.00           C  
ATOM    595  CG  LYS A  79      24.446  -2.003-141.834  1.00  0.00           C  
ATOM    596  CD  LYS A  79      25.691  -2.840-141.582  1.00  0.00           C  
ATOM    597  CE  LYS A  79      26.917  -2.221-142.237  1.00  0.00           C  
ATOM    598  NZ  LYS A  79      28.145  -3.023-141.989  1.00  0.00           N1+
ATOM    599  N   GLU A  80      21.427  -2.765-143.615  1.00  0.00           N  
ATOM    600  CA  GLU A  80      21.263  -2.734-145.066  1.00  0.00           C  
ATOM    601  C   GLU A  80      20.768  -4.029-145.703  1.00  0.00           C  
ATOM    602  O   GLU A  80      20.833  -5.108-145.118  1.00  0.00           O  
ATOM    603  CB  GLU A  80      22.593  -2.344-145.713  1.00  0.00           C  
ATOM    604  CG  GLU A  80      23.726  -3.331-145.465  1.00  0.00           C  
ATOM    605  CD  GLU A  80      25.052  -2.840-145.975  1.00  0.00           C  
ATOM    606  OE1 GLU A  80      25.089  -1.779-146.551  1.00  0.00           O  
ATOM    607  OE2 GLU A  80      26.028  -3.527-145.789  1.00  0.00           O1-
ATOM    608  N   VAL A  81      20.268  -3.888-146.923  1.00  0.00           N  
ATOM    609  CA  VAL A  81      19.746  -4.987-147.711  1.00  0.00           C  
ATOM    610  C   VAL A  81      20.408  -4.885-149.082  1.00  0.00           C  
ATOM    611  O   VAL A  81      20.386  -3.832-149.726  1.00  0.00           O  
ATOM    612  CB  VAL A  81      18.213  -4.912-147.839  1.00  0.00           C  
ATOM    613  CG1 VAL A  81      17.693  -6.062-148.688  1.00  0.00           C  
ATOM    614  CG2 VAL A  81      17.577  -4.930-146.457  1.00  0.00           C  
ATOM    615  N   GLU A  82      21.007  -5.988-149.512  1.00  0.00           N  
ATOM    616  CA  GLU A  82      21.684  -6.056-150.794  1.00  0.00           C  
ATOM    617  C   GLU A  82      21.164  -7.197-151.652  1.00  0.00           C  
ATOM    618  O   GLU A  82      21.047  -8.335-151.208  1.00  0.00           O  
ATOM    619  CB  GLU A  82      23.192  -6.212-150.586  1.00  0.00           C  
ATOM    620  CG  GLU A  82      24.002  -6.268-151.873  1.00  0.00           C  
ATOM    621  CD  GLU A  82      25.481  -6.387-151.630  1.00  0.00           C  
ATOM    622  OE1 GLU A  82      25.876  -6.409-150.489  1.00  0.00           O  
ATOM    623  OE2 GLU A  82      26.216  -6.455-152.586  1.00  0.00           O1-
ATOM    624  N   VAL A  83      20.826  -6.864-152.891  1.00  0.00           N  
ATOM    625  CA  VAL A  83      20.390  -7.844-153.865  1.00  0.00           C  
ATOM    626  C   VAL A  83      21.640  -8.191-154.632  1.00  0.00           C  
ATOM    627  O   VAL A  83      22.328  -7.306-155.155  1.00  0.00           O  
ATOM    628  CB  VAL A  83      19.304  -7.288-154.804  1.00  0.00           C  
ATOM    629  CG1 VAL A  83      18.884  -8.344-155.816  1.00  0.00           C  
ATOM    630  CG2 VAL A  83      18.108  -6.814-153.991  1.00  0.00           C  
ATOM    631  N   LYS A  84      21.949  -9.474-154.688  1.00  0.00           N  
ATOM    632  CA  LYS A  84      23.121  -9.937-155.409  1.00  0.00           C  
ATOM    633  C   LYS A  84      22.857 -11.357-155.890  1.00  0.00           C  
ATOM    634  O   LYS A  84      22.662 -12.270-155.077  1.00  0.00           O  
ATOM    635  CB  LYS A  84      24.371  -9.883-154.529  1.00  0.00           C  
ATOM    636  CG  LYS A  84      25.660 -10.269-155.242  1.00  0.00           C  
ATOM    637  CD  LYS A  84      26.868 -10.089-154.335  1.00  0.00           C  
ATOM    638  CE  LYS A  84      28.157 -10.477-155.045  1.00  0.00           C  
ATOM    639  NZ  LYS A  84      29.348 -10.301-154.171  1.00  0.00           N1+
ATOM    640  N   ASN A  85      22.850 -11.519-157.214  1.00  0.00           N  
ATOM    641  CA  ASN A  85      22.644 -12.806-157.875  1.00  0.00           C  
ATOM    642  C   ASN A  85      21.308 -13.436-157.492  1.00  0.00           C  
ATOM    643  O   ASN A  85      21.217 -14.642-157.285  1.00  0.00           O  
ATOM    644  CB  ASN A  85      23.786 -13.754-157.556  1.00  0.00           C  
ATOM    645  CG  ASN A  85      25.109 -13.259-158.070  1.00  0.00           C  
ATOM    646  ND2 ASN A  85      26.154 -13.495-157.318  1.00  0.00           N  
ATOM    647  OD1 ASN A  85      25.185 -12.662-159.151  1.00  0.00           O  
ATOM    648  N   GLY A  86      20.281 -12.594-157.398  1.00  0.00           N  
ATOM    649  CA  GLY A  86      18.952 -13.066-157.044  1.00  0.00           C  
ATOM    650  C   GLY A  86      18.758 -13.362-155.567  1.00  0.00           C  
ATOM    651  O   GLY A  86      17.691 -13.818-155.164  1.00  0.00           O  
ATOM    652  N   VAL A  87      19.792 -13.122-154.763  1.00  0.00           N  
ATOM    653  CA  VAL A  87      19.724 -13.371-153.326  1.00  0.00           C  
ATOM    654  C   VAL A  87      19.584 -12.024-152.638  1.00  0.00           C  
ATOM    655  O   VAL A  87      20.326 -11.095-152.946  1.00  0.00           O  
ATOM    656  CB  VAL A  87      20.985 -14.097-152.820  1.00  0.00           C  
ATOM    657  CG1 VAL A  87      20.923 -14.285-151.312  1.00  0.00           C  
ATOM    658  CG2 VAL A  87      21.128 -15.437-153.525  1.00  0.00           C  
ATOM    659  N   VAL A  88      18.633 -11.912-151.720  1.00  0.00           N  
ATOM    660  CA  VAL A  88      18.403 -10.649-151.060  1.00  0.00           C  
ATOM    661  C   VAL A  88      18.787 -10.792-149.594  1.00  0.00           C  
ATOM    662  O   VAL A  88      18.058 -11.390-148.804  1.00  0.00           O  
ATOM    663  CB  VAL A  88      16.927 -10.227-151.184  1.00  0.00           C  
ATOM    664  CG1 VAL A  88      16.709  -8.860-150.552  1.00  0.00           C  
ATOM    665  CG2 VAL A  88      16.513 -10.216-152.648  1.00  0.00           C  
ATOM    666  N   THR A  89      19.957 -10.264-149.248  1.00  0.00           N  
ATOM    667  CA  THR A  89      20.553 -10.469-147.933  1.00  0.00           C  
ATOM    668  C   THR A  89      20.420  -9.229-147.060  1.00  0.00           C  
ATOM    669  O   THR A  89      20.716  -8.123-147.497  1.00  0.00           O  
ATOM    670  CB  THR A  89      22.038 -10.857-148.053  1.00  0.00           C  
ATOM    671  CG2 THR A  89      22.665 -11.000-146.675  1.00  0.00           C  
ATOM    672  OG1 THR A  89      22.155 -12.100-148.759  1.00  0.00           O  
ATOM    673  N   ALA A  90      19.972  -9.404-145.821  1.00  0.00           N  
ATOM    674  CA  ALA A  90      19.788  -8.258-144.933  1.00  0.00           C  
ATOM    675  C   ALA A  90      20.707  -8.374-143.733  1.00  0.00           C  
ATOM    676  O   ALA A  90      20.891  -9.466-143.211  1.00  0.00           O  
ATOM    677  CB  ALA A  90      18.336  -8.146-144.487  1.00  0.00           C  
ATOM    678  N   THR A  91      21.283  -7.252-143.302  1.00  0.00           N  
ATOM    679  CA  THR A  91      22.191  -7.262-142.161  1.00  0.00           C  
ATOM    680  C   THR A  91      21.746  -6.305-141.067  1.00  0.00           C  
ATOM    681  O   THR A  91      21.312  -5.176-141.327  1.00  0.00           O  
ATOM    682  CB  THR A  91      23.625  -6.907-142.597  1.00  0.00           C  
ATOM    683  CG2 THR A  91      24.563  -6.909-141.400  1.00  0.00           C  
ATOM    684  OG1 THR A  91      24.084  -7.863-143.562  1.00  0.00           O  
ATOM    685  N   MET A  92      21.844  -6.786-139.831  1.00  0.00           N  
ATOM    686  CA  MET A  92      21.391  -6.030-138.675  1.00  0.00           C  
ATOM    687  C   MET A  92      22.497  -5.073-138.243  1.00  0.00           C  
ATOM    688  O   MET A  92      23.669  -5.289-138.541  1.00  0.00           O  
ATOM    689  CB  MET A  92      21.000  -6.968-137.535  1.00  0.00           C  
ATOM    690  CG  MET A  92      19.842  -7.901-137.857  1.00  0.00           C  
ATOM    691  SD  MET A  92      18.321  -7.013-138.248  1.00  0.00           S  
ATOM    692  CE  MET A  92      17.965  -6.243-136.671  1.00  0.00           C  
ATOM    693  N   LEU A  93      22.111  -4.013-137.547  1.00  0.00           N  
ATOM    694  CA  LEU A  93      23.064  -3.117-136.906  1.00  0.00           C  
ATOM    695  C   LEU A  93      23.599  -3.778-135.633  1.00  0.00           C  
ATOM    696  O   LEU A  93      23.251  -4.918-135.311  1.00  0.00           O  
ATOM    697  CB  LEU A  93      22.403  -1.774-136.573  1.00  0.00           C  
ATOM    698  CG  LEU A  93      22.005  -0.911-137.777  1.00  0.00           C  
ATOM    699  CD1 LEU A  93      21.151   0.258-137.305  1.00  0.00           C  
ATOM    700  CD2 LEU A  93      23.259  -0.420-138.487  1.00  0.00           C  
ATOM    701  N   SER A  94      24.457  -3.063-134.913  1.00  0.00           N  
ATOM    702  CA  SER A  94      24.895  -3.516-133.603  1.00  0.00           C  
ATOM    703  C   SER A  94      24.547  -2.448-132.580  1.00  0.00           C  
ATOM    704  O   SER A  94      24.679  -2.664-131.378  1.00  0.00           O  
ATOM    705  CB  SER A  94      26.387  -3.790-133.597  1.00  0.00           C  
ATOM    706  OG  SER A  94      27.114  -2.617-133.838  1.00  0.00           O  
ATOM    707  N   SER A  95      24.098  -1.298-133.072  1.00  0.00           N  
ATOM    708  CA  SER A  95      23.685  -0.191-132.212  1.00  0.00           C  
ATOM    709  C   SER A  95      22.167  -0.150-132.047  1.00  0.00           C  
ATOM    710  O   SER A  95      21.436   0.191-132.982  1.00  0.00           O  
ATOM    711  CB  SER A  95      24.175   1.124-132.786  1.00  0.00           C  
ATOM    712  OG  SER A  95      23.716   2.206-132.024  1.00  0.00           O  
ATOM    713  N   GLY A  96      21.703  -0.500-130.851  1.00  0.00           N  
ATOM    714  CA  GLY A  96      20.279  -0.660-130.618  1.00  0.00           C  
ATOM    715  C   GLY A  96      19.756  -2.066-130.844  1.00  0.00           C  
ATOM    716  O   GLY A  96      18.637  -2.387-130.440  1.00  0.00           O  
ATOM    717  N   VAL A  97      20.561  -2.915-131.482  1.00  0.00           N  
ATOM    718  CA  VAL A  97      20.165  -4.305-131.704  1.00  0.00           C  
ATOM    719  C   VAL A  97      20.522  -5.262-130.554  1.00  0.00           C  
ATOM    720  O   VAL A  97      21.601  -5.175-129.968  1.00  0.00           O  
ATOM    721  CB  VAL A  97      20.825  -4.819-132.997  1.00  0.00           C  
ATOM    722  CG1 VAL A  97      20.524  -6.297-133.198  1.00  0.00           C  
ATOM    723  CG2 VAL A  97      20.340  -4.004-134.186  1.00  0.00           C  
ATOM    724  N   ASN A  98      19.604  -6.170-130.240  1.00  0.00           N  
ATOM    725  CA  ASN A  98      19.688  -6.993-129.043  1.00  0.00           C  
ATOM    726  C   ASN A  98      21.125  -7.325-128.674  1.00  0.00           C  
ATOM    727  O   ASN A  98      21.764  -6.601-127.911  1.00  0.00           O  
ATOM    728  CB  ASN A  98      18.882  -8.267-129.221  1.00  0.00           C  
ATOM    729  CG  ASN A  98      18.934  -9.158-128.012  1.00  0.00           C  
ATOM    730  ND2 ASN A  98      18.087  -8.889-127.051  1.00  0.00           N  
ATOM    731  OD1 ASN A  98      19.742 -10.092-127.947  1.00  0.00           O  
ATOM    732  N   ASN A  99      21.629  -8.422-129.218  1.00  0.00           N  
ATOM    733  CA  ASN A  99      22.985  -8.859-128.934  1.00  0.00           C  
ATOM    734  C   ASN A  99      23.178 -10.224-129.577  1.00  0.00           C  
ATOM    735  O   ASN A  99      24.248 -10.543-130.092  1.00  0.00           O  
ATOM    736  CB  ASN A  99      23.255  -8.903-127.441  1.00  0.00           C  
ATOM    737  CG  ASN A  99      24.670  -9.299-127.122  1.00  0.00           C  
ATOM    738  ND2 ASN A  99      24.932  -9.569-125.869  1.00  0.00           N  
ATOM    739  OD1 ASN A  99      25.527  -9.360-128.012  1.00  0.00           O  
ATOM    740  N   GLU A 100      22.131 -11.037-129.544  1.00  0.00           N  
ATOM    741  CA  GLU A 100      22.224 -12.362-130.126  1.00  0.00           C  
ATOM    742  C   GLU A 100      21.982 -12.294-131.617  1.00  0.00           C  
ATOM    743  O   GLU A 100      22.256 -13.246-132.339  1.00  0.00           O  
ATOM    744  CB  GLU A 100      21.218 -13.312-129.473  1.00  0.00           C  
ATOM    745  CG  GLU A 100      21.496 -13.610-128.006  1.00  0.00           C  
ATOM    746  CD  GLU A 100      20.540 -14.613-127.422  1.00  0.00           C  
ATOM    747  OE1 GLU A 100      19.640 -15.022-128.116  1.00  0.00           O  
ATOM    748  OE2 GLU A 100      20.710 -14.970-126.280  1.00  0.00           O1-
ATOM    749  N   ILE A 101      21.470 -11.162-132.083  1.00  0.00           N  
ATOM    750  CA  ILE A 101      21.332 -10.944-133.518  1.00  0.00           C  
ATOM    751  C   ILE A 101      22.109  -9.733-134.048  1.00  0.00           C  
ATOM    752  O   ILE A 101      21.902  -9.317-135.188  1.00  0.00           O  
ATOM    753  CB  ILE A 101      19.845 -10.781-133.882  1.00  0.00           C  
ATOM    754  CG1 ILE A 101      19.240  -9.590-133.135  1.00  0.00           C  
ATOM    755  CG2 ILE A 101      19.077 -12.056-133.568  1.00  0.00           C  
ATOM    756  CD1 ILE A 101      17.868  -9.192-133.630  1.00  0.00           C  
ATOM    757  N   LYS A 102      23.006  -9.174-133.243  1.00  0.00           N  
ATOM    758  CA  LYS A 102      23.715  -7.969-133.655  1.00  0.00           C  
ATOM    759  C   LYS A 102      24.710  -8.244-134.771  1.00  0.00           C  
ATOM    760  O   LYS A 102      25.628  -9.060-134.623  1.00  0.00           O  
ATOM    761  CB  LYS A 102      24.434  -7.341-132.460  1.00  0.00           C  
ATOM    762  CG  LYS A 102      25.675  -8.098-132.005  1.00  0.00           C  
ATOM    763  CD  LYS A 102      26.313  -7.435-130.793  1.00  0.00           C  
ATOM    764  CE  LYS A 102      27.613  -8.123-130.405  1.00  0.00           C  
ATOM    765  NZ  LYS A 102      27.393  -9.538-129.998  1.00  0.00           N1+
ATOM    766  N   GLY A 103      24.523  -7.546-135.887  1.00  0.00           N  
ATOM    767  CA  GLY A 103      25.460  -7.655-136.982  1.00  0.00           C  
ATOM    768  C   GLY A 103      25.268  -9.009-137.634  1.00  0.00           C  
ATOM    769  O   GLY A 103      26.158  -9.514-138.316  1.00  0.00           O  
ATOM    770  N   LYS A 104      24.102  -9.615-137.421  1.00  0.00           N  
ATOM    771  CA  LYS A 104      23.836 -10.922-138.007  1.00  0.00           C  
ATOM    772  C   LYS A 104      22.837 -10.781-139.140  1.00  0.00           C  
ATOM    773  O   LYS A 104      22.238  -9.721-139.319  1.00  0.00           O  
ATOM    774  CB  LYS A 104      23.312 -11.899-136.953  1.00  0.00           C  
ATOM    775  CG  LYS A 104      24.336 -12.292-135.896  1.00  0.00           C  
ATOM    776  CD  LYS A 104      23.859 -13.485-135.082  1.00  0.00           C  
ATOM    777  CE  LYS A 104      24.877 -13.874-134.020  1.00  0.00           C  
ATOM    778  NZ  LYS A 104      24.349 -14.914-133.096  1.00  0.00           N1+
ATOM    779  N   LYS A 105      22.663 -11.847-139.915  1.00  0.00           N  
ATOM    780  CA  LYS A 105      21.974 -11.697-141.188  1.00  0.00           C  
ATOM    781  C   LYS A 105      21.077 -12.840-141.677  1.00  0.00           C  
ATOM    782  O   LYS A 105      21.047 -13.924-141.099  1.00  0.00           O  
ATOM    783  CB  LYS A 105      23.022 -11.410-142.265  1.00  0.00           C  
ATOM    784  CG  LYS A 105      24.159 -12.421-142.321  1.00  0.00           C  
ATOM    785  CD  LYS A 105      25.193 -12.033-143.368  1.00  0.00           C  
ATOM    786  CE  LYS A 105      26.339 -13.033-143.413  1.00  0.00           C  
ATOM    787  NZ  LYS A 105      27.389 -12.631-144.387  1.00  0.00           N1+
ATOM    788  N   LEU A 106      20.333 -12.546-142.745  1.00  0.00           N  
ATOM    789  CA  LEU A 106      19.409 -13.480-143.369  1.00  0.00           C  
ATOM    790  C   LEU A 106      19.357 -13.232-144.886  1.00  0.00           C  
ATOM    791  O   LEU A 106      19.822 -12.193-145.369  1.00  0.00           O  
ATOM    792  CB  LEU A 106      18.009 -13.332-142.759  1.00  0.00           C  
ATOM    793  CG  LEU A 106      17.384 -11.934-142.858  1.00  0.00           C  
ATOM    794  CD1 LEU A 106      16.696 -11.780-144.207  1.00  0.00           C  
ATOM    795  CD2 LEU A 106      16.400 -11.736-141.715  1.00  0.00           C  
ATOM    796  N   SER A 107      18.809 -14.184-145.640  1.00  0.00           N  
ATOM    797  CA  SER A 107      18.633 -13.993-147.070  1.00  0.00           C  
ATOM    798  C   SER A 107      17.271 -14.421-147.553  1.00  0.00           C  
ATOM    799  O   SER A 107      16.551 -15.153-146.887  1.00  0.00           O  
ATOM    800  CB  SER A 107      19.697 -14.764-147.827  1.00  0.00           C  
ATOM    801  OG  SER A 107      20.981 -14.360-147.438  1.00  0.00           O  
ATOM    802  N   LEU A 108      16.943 -13.952-148.745  1.00  0.00           N  
ATOM    803  CA  LEU A 108      15.797 -14.406-149.497  1.00  0.00           C  
ATOM    804  C   LEU A 108      16.466 -15.066-150.673  1.00  0.00           C  
ATOM    805  O   LEU A 108      17.540 -14.642-151.084  1.00  0.00           O  
ATOM    806  CB  LEU A 108      14.869 -13.262-149.926  1.00  0.00           C  
ATOM    807  CG  LEU A 108      14.321 -12.389-148.790  1.00  0.00           C  
ATOM    808  CD1 LEU A 108      13.463 -11.275-149.374  1.00  0.00           C  
ATOM    809  CD2 LEU A 108      13.516 -13.252-147.830  1.00  0.00           C  
ATOM    810  N   TRP A 109      15.865 -16.126-151.194  1.00  0.00           N  
ATOM    811  CA  TRP A 109      16.394 -16.750-152.386  1.00  0.00           C  
ATOM    812  C   TRP A 109      15.245 -17.448-153.026  1.00  0.00           C  
ATOM    813  O   TRP A 109      14.182 -17.569-152.430  1.00  0.00           O  
ATOM    814  CB  TRP A 109      17.518 -17.738-152.069  1.00  0.00           C  
ATOM    815  CG  TRP A 109      17.086 -18.875-151.193  1.00  0.00           C  
ATOM    816  CD1 TRP A 109      16.667 -20.105-151.601  1.00  0.00           C  
ATOM    817  CD2 TRP A 109      17.028 -18.892-149.746  1.00  0.00           C  
ATOM    818  CE2 TRP A 109      16.569 -20.157-149.371  1.00  0.00           C  
ATOM    819  CE3 TRP A 109      17.325 -17.949-148.754  1.00  0.00           C  
ATOM    820  NE1 TRP A 109      16.353 -20.883-150.515  1.00  0.00           N  
ATOM    821  CZ2 TRP A 109      16.396 -20.511-148.042  1.00  0.00           C  
ATOM    822  CZ3 TRP A 109      17.153 -18.304-147.421  1.00  0.00           C  
ATOM    823  CH2 TRP A 109      16.701 -19.552-147.075  1.00  0.00           C  
ATOM    824  N   ALA A 110      15.433 -17.908-154.245  1.00  0.00           N  
ATOM    825  CA  ALA A 110      14.327 -18.504-154.949  1.00  0.00           C  
ATOM    826  C   ALA A 110      14.782 -19.592-155.884  1.00  0.00           C  
ATOM    827  O   ALA A 110      15.897 -19.568-156.412  1.00  0.00           O  
ATOM    828  CB  ALA A 110      13.552 -17.439-155.711  1.00  0.00           C  
ATOM    829  N   ARG A 111      13.892 -20.546-156.110  1.00  0.00           N  
ATOM    830  CA  ARG A 111      14.152 -21.600-157.058  1.00  0.00           C  
ATOM    831  C   ARG A 111      13.246 -21.431-158.256  1.00  0.00           C  
ATOM    832  O   ARG A 111      12.169 -20.855-158.155  1.00  0.00           O  
ATOM    833  CB  ARG A 111      13.929 -22.968-156.429  1.00  0.00           C  
ATOM    834  CG  ARG A 111      14.839 -23.287-155.253  1.00  0.00           C  
ATOM    835  CD  ARG A 111      16.250 -23.464-155.683  1.00  0.00           C  
ATOM    836  NE  ARG A 111      16.380 -24.486-156.709  1.00  0.00           N  
ATOM    837  CZ  ARG A 111      16.485 -25.807-156.464  1.00  0.00           C  
ATOM    838  NH1 ARG A 111      16.475 -26.249-155.226  1.00  0.00           N1+
ATOM    839  NH2 ARG A 111      16.599 -26.658-157.469  1.00  0.00           N  
ATOM    840  N   ARG A 112      13.703 -21.927-159.393  1.00  0.00           N  
ATOM    841  CA  ARG A 112      12.957 -21.803-160.635  1.00  0.00           C  
ATOM    842  C   ARG A 112      11.795 -22.787-160.635  1.00  0.00           C  
ATOM    843  O   ARG A 112      11.993 -23.991-160.503  1.00  0.00           O  
ATOM    844  CB  ARG A 112      13.852 -22.063-161.837  1.00  0.00           C  
ATOM    845  CG  ARG A 112      13.181 -21.873-163.188  1.00  0.00           C  
ATOM    846  CD  ARG A 112      14.074 -22.271-164.306  1.00  0.00           C  
ATOM    847  NE  ARG A 112      13.399 -22.201-165.591  1.00  0.00           N  
ATOM    848  CZ  ARG A 112      13.413 -21.128-166.406  1.00  0.00           C  
ATOM    849  NH1 ARG A 112      14.071 -20.045-166.055  1.00  0.00           N1+
ATOM    850  NH2 ARG A 112      12.765 -21.163-167.557  1.00  0.00           N  
ATOM    851  N   GLU A 113      10.579 -22.276-160.757  1.00  0.00           N  
ATOM    852  CA  GLU A 113       9.437 -23.163-160.892  1.00  0.00           C  
ATOM    853  C   GLU A 113       9.243 -23.400-162.375  1.00  0.00           C  
ATOM    854  O   GLU A 113       8.674 -24.410-162.789  1.00  0.00           O  
ATOM    855  CB  GLU A 113       8.177 -22.563-160.264  1.00  0.00           C  
ATOM    856  CG  GLU A 113       8.235 -22.421-158.750  1.00  0.00           C  
ATOM    857  CD  GLU A 113       6.981 -21.831-158.169  1.00  0.00           C  
ATOM    858  OE1 GLU A 113       6.481 -20.882-158.723  1.00  0.00           O  
ATOM    859  OE2 GLU A 113       6.521 -22.330-157.168  1.00  0.00           O1-
ATOM    860  N   ASN A 114       9.750 -22.454-163.162  1.00  0.00           N  
ATOM    861  CA  ASN A 114       9.742 -22.527-164.616  1.00  0.00           C  
ATOM    862  C   ASN A 114       8.508 -21.766-165.073  1.00  0.00           C  
ATOM    863  O   ASN A 114       7.405 -22.311-165.119  1.00  0.00           O  
ATOM    864  CB  ASN A 114       9.738 -23.961-165.114  1.00  0.00           C  
ATOM    865  CG  ASN A 114      10.114 -24.069-166.566  1.00  0.00           C  
ATOM    866  ND2 ASN A 114       9.375 -24.857-167.304  1.00  0.00           N  
ATOM    867  OD1 ASN A 114      11.075 -23.437-167.020  1.00  0.00           O  
ATOM    868  N   GLY A 115       8.704 -20.492-165.391  1.00  0.00           N  
ATOM    869  CA  GLY A 115       7.578 -19.617-165.680  1.00  0.00           C  
ATOM    870  C   GLY A 115       7.321 -18.725-164.476  1.00  0.00           C  
ATOM    871  O   GLY A 115       6.598 -17.729-164.551  1.00  0.00           O  
ATOM    872  N   SER A 116       7.916 -19.105-163.352  1.00  0.00           N  
ATOM    873  CA  SER A 116       7.788 -18.376-162.096  1.00  0.00           C  
ATOM    874  C   SER A 116       8.890 -18.884-161.164  1.00  0.00           C  
ATOM    875  O   SER A 116       9.636 -19.800-161.516  1.00  0.00           O  
ATOM    876  CB  SER A 116       6.419 -18.585-161.480  1.00  0.00           C  
ATOM    877  OG  SER A 116       6.233 -19.923-161.109  1.00  0.00           O  
ATOM    878  N   VAL A 117       9.000 -18.279-159.986  1.00  0.00           N  
ATOM    879  CA  VAL A 117      10.003 -18.703-159.024  1.00  0.00           C  
ATOM    880  C   VAL A 117       9.367 -18.895-157.652  1.00  0.00           C  
ATOM    881  O   VAL A 117       8.349 -18.287-157.346  1.00  0.00           O  
ATOM    882  CB  VAL A 117      11.134 -17.661-158.931  1.00  0.00           C  
ATOM    883  CG1 VAL A 117      11.830 -17.509-160.275  1.00  0.00           C  
ATOM    884  CG2 VAL A 117      10.573 -16.329-158.459  1.00  0.00           C  
ATOM    885  N   LYS A 118       9.960 -19.768-156.844  1.00  0.00           N  
ATOM    886  CA  LYS A 118       9.450 -20.045-155.518  1.00  0.00           C  
ATOM    887  C   LYS A 118      10.387 -19.386-154.500  1.00  0.00           C  
ATOM    888  O   LYS A 118      11.560 -19.762-154.388  1.00  0.00           O  
ATOM    889  CB  LYS A 118       9.341 -21.551-155.273  1.00  0.00           C  
ATOM    890  CG  LYS A 118       8.734 -21.928-153.928  1.00  0.00           C  
ATOM    891  CD  LYS A 118       8.568 -23.435-153.799  1.00  0.00           C  
ATOM    892  CE  LYS A 118       8.002 -23.816-152.439  1.00  0.00           C  
ATOM    893  NZ  LYS A 118       7.848 -25.289-152.293  1.00  0.00           N1+
ATOM    894  N   TRP A 119       9.875 -18.408-153.761  1.00  0.00           N  
ATOM    895  CA  TRP A 119      10.699 -17.700-152.791  1.00  0.00           C  
ATOM    896  C   TRP A 119      10.765 -18.300-151.390  1.00  0.00           C  
ATOM    897  O   TRP A 119       9.769 -18.783-150.842  1.00  0.00           O  
ATOM    898  CB  TRP A 119      10.197 -16.259-152.674  1.00  0.00           C  
ATOM    899  CG  TRP A 119      10.633 -15.380-153.808  1.00  0.00           C  
ATOM    900  CD1 TRP A 119       9.917 -15.078-154.927  1.00  0.00           C  
ATOM    901  CD2 TRP A 119      11.894 -14.680-153.937  1.00  0.00           C  
ATOM    902  CE2 TRP A 119      11.853 -13.989-155.151  1.00  0.00           C  
ATOM    903  CE3 TRP A 119      13.036 -14.586-153.132  1.00  0.00           C  
ATOM    904  NE1 TRP A 119      10.641 -14.244-155.742  1.00  0.00           N  
ATOM    905  CZ2 TRP A 119      12.913 -13.210-155.587  1.00  0.00           C  
ATOM    906  CZ3 TRP A 119      14.098 -13.804-153.569  1.00  0.00           C  
ATOM    907  CH2 TRP A 119      14.038 -13.133-154.765  1.00  0.00           C  
ATOM    908  N   PHE A 120      11.951 -18.233-150.810  1.00  0.00           N  
ATOM    909  CA  PHE A 120      12.198 -18.800-149.498  1.00  0.00           C  
ATOM    910  C   PHE A 120      12.802 -17.704-148.649  1.00  0.00           C  
ATOM    911  O   PHE A 120      13.443 -16.798-149.168  1.00  0.00           O  
ATOM    912  CB  PHE A 120      13.137 -20.005-149.573  1.00  0.00           C  
ATOM    913  CG  PHE A 120      12.633 -21.112-150.454  1.00  0.00           C  
ATOM    914  CD1 PHE A 120      12.998 -21.175-151.791  1.00  0.00           C  
ATOM    915  CD2 PHE A 120      11.793 -22.093-149.949  1.00  0.00           C  
ATOM    916  CE1 PHE A 120      12.535 -22.193-152.602  1.00  0.00           C  
ATOM    917  CE2 PHE A 120      11.330 -23.113-150.757  1.00  0.00           C  
ATOM    918  CZ  PHE A 120      11.701 -23.162-152.086  1.00  0.00           C  
ATOM    919  N   CYS A 121      12.585 -17.795-147.342  1.00  0.00           N  
ATOM    920  CA  CYS A 121      13.078 -16.793-146.405  1.00  0.00           C  
ATOM    921  C   CYS A 121      13.724 -17.533-145.244  1.00  0.00           C  
ATOM    922  O   CYS A 121      13.072 -18.332-144.570  1.00  0.00           O  
ATOM    923  CB  CYS A 121      11.950 -15.894-145.895  1.00  0.00           C  
ATOM    924  SG  CYS A 121      12.497 -14.596-144.761  1.00  0.00           S  
ATOM    925  N   GLY A 122      15.003 -17.280-145.011  1.00  0.00           N  
ATOM    926  CA  GLY A 122      15.694 -18.009-143.964  1.00  0.00           C  
ATOM    927  C   GLY A 122      17.107 -17.527-143.714  1.00  0.00           C  
ATOM    928  O   GLY A 122      17.412 -16.364-143.907  1.00  0.00           O  
ATOM    929  N   GLN A 123      17.965 -18.435-143.269  1.00  0.00           N  
ATOM    930  CA  GLN A 123      19.347 -18.096-142.960  1.00  0.00           C  
ATOM    931  C   GLN A 123      20.093 -17.794-144.247  1.00  0.00           C  
ATOM    932  O   GLN A 123      19.649 -18.174-145.324  1.00  0.00           O  
ATOM    933  CB  GLN A 123      20.036 -19.234-142.201  1.00  0.00           C  
ATOM    934  CG  GLN A 123      19.518 -19.443-140.789  1.00  0.00           C  
ATOM    935  CD  GLN A 123      20.342 -20.453-140.013  1.00  0.00           C  
ATOM    936  NE2 GLN A 123      20.573 -20.171-138.736  1.00  0.00           N  
ATOM    937  OE1 GLN A 123      20.766 -21.477-140.556  1.00  0.00           O  
ATOM    938  N   PRO A 124      21.256 -17.128-144.140  1.00  0.00           N  
ATOM    939  CA  PRO A 124      22.075 -16.650-145.260  1.00  0.00           C  
ATOM    940  C   PRO A 124      22.462 -17.694-146.280  1.00  0.00           C  
ATOM    941  O   PRO A 124      22.897 -18.784-145.925  1.00  0.00           O  
ATOM    942  CB  PRO A 124      23.319 -16.115-144.544  1.00  0.00           C  
ATOM    943  CG  PRO A 124      22.804 -15.618-143.237  1.00  0.00           C  
ATOM    944  CD  PRO A 124      21.762 -16.629-142.836  1.00  0.00           C  
ATOM    945  N   VAL A 125      22.314 -17.342-147.551  1.00  0.00           N  
ATOM    946  CA  VAL A 125      22.692 -18.237-148.627  1.00  0.00           C  
ATOM    947  C   VAL A 125      23.475 -17.472-149.699  1.00  0.00           C  
ATOM    948  O   VAL A 125      23.583 -16.249-149.657  1.00  0.00           O  
ATOM    949  CB  VAL A 125      21.440 -18.880-149.253  1.00  0.00           C  
ATOM    950  CG1 VAL A 125      20.657 -19.654-148.202  1.00  0.00           C  
ATOM    951  CG2 VAL A 125      20.570 -17.807-149.890  1.00  0.00           C  
ATOM    952  N   THR A 126      24.037 -18.198-150.656  1.00  0.00           N  
ATOM    953  CA  THR A 126      24.715 -17.570-151.783  1.00  0.00           C  
ATOM    954  C   THR A 126      24.339 -18.357-153.018  1.00  0.00           C  
ATOM    955  O   THR A 126      24.141 -19.555-152.921  1.00  0.00           O  
ATOM    956  CB  THR A 126      26.244 -17.539-151.607  1.00  0.00           C  
ATOM    957  CG2 THR A 126      26.802 -18.953-151.539  1.00  0.00           C  
ATOM    958  OG1 THR A 126      26.842 -16.847-152.710  1.00  0.00           O  
ATOM    959  N   ARG A 127      24.228 -17.718-154.176  1.00  0.00           N  
ATOM    960  CA  ARG A 127      23.812 -18.483-155.339  1.00  0.00           C  
ATOM    961  C   ARG A 127      25.032 -19.068-156.042  1.00  0.00           C  
ATOM    962  O   ARG A 127      26.058 -18.410-156.201  1.00  0.00           O  
ATOM    963  CB  ARG A 127      23.028 -17.611-156.309  1.00  0.00           C  
ATOM    964  CG  ARG A 127      22.468 -18.344-157.518  1.00  0.00           C  
ATOM    965  CD  ARG A 127      21.534 -17.488-158.294  1.00  0.00           C  
ATOM    966  NE  ARG A 127      20.338 -17.163-157.535  1.00  0.00           N  
ATOM    967  CZ  ARG A 127      19.290 -17.993-157.364  1.00  0.00           C  
ATOM    968  NH1 ARG A 127      19.307 -19.192-157.904  1.00  0.00           N1+
ATOM    969  NH2 ARG A 127      18.246 -17.603-156.654  1.00  0.00           N  
ATOM    970  N   THR A 128      24.912 -20.324-156.446  1.00  0.00           N  
ATOM    971  CA  THR A 128      25.987 -21.017-157.117  1.00  0.00           C  
ATOM    972  C   THR A 128      25.758 -20.862-158.609  1.00  0.00           C  
ATOM    973  O   THR A 128      26.660 -20.441-159.334  1.00  0.00           O  
ATOM    974  CB  THR A 128      26.052 -22.505-156.726  1.00  0.00           C  
ATOM    975  CG2 THR A 128      27.168 -23.207-157.485  1.00  0.00           C  
ATOM    976  OG1 THR A 128      26.289 -22.622-155.317  1.00  0.00           O  
ATOM    977  N   ASP A 129      24.558 -21.189-159.062  1.00  0.00           N  
ATOM    978  CA  ASP A 129      24.241 -21.137-160.480  1.00  0.00           C  
ATOM    979  C   ASP A 129      22.760 -20.749-160.634  1.00  0.00           C  
ATOM    980  O   ASP A 129      22.115 -20.362-159.658  1.00  0.00           O  
ATOM    981  CB  ASP A 129      24.521 -22.483-161.154  1.00  0.00           C  
ATOM    982  CG  ASP A 129      23.599 -23.593-160.668  1.00  0.00           C  
ATOM    983  OD1 ASP A 129      22.429 -23.338-160.507  1.00  0.00           O  
ATOM    984  OD2 ASP A 129      24.073 -24.684-160.462  1.00  0.00           O1-
ATOM    985  N   ASP A 130      22.220 -20.856-161.841  1.00  0.00           N  
ATOM    986  CA  ASP A 130      20.875 -20.342-162.095  1.00  0.00           C  
ATOM    987  C   ASP A 130      19.760 -20.981-161.285  1.00  0.00           C  
ATOM    988  O   ASP A 130      18.695 -20.400-161.106  1.00  0.00           O  
ATOM    989  CB  ASP A 130      20.545 -20.501-163.582  1.00  0.00           C  
ATOM    990  CG  ASP A 130      21.345 -19.559-164.470  1.00  0.00           C  
ATOM    991  OD1 ASP A 130      21.956 -18.657-163.948  1.00  0.00           O  
ATOM    992  OD2 ASP A 130      21.338 -19.750-165.663  1.00  0.00           O1-
ATOM    993  N   ASP A 131      20.009 -22.166-160.769  1.00  0.00           N  
ATOM    994  CA  ASP A 131      19.000 -22.813-159.956  1.00  0.00           C  
ATOM    995  C   ASP A 131      19.607 -23.527-158.752  1.00  0.00           C  
ATOM    996  O   ASP A 131      19.040 -24.493-158.237  1.00  0.00           O  
ATOM    997  CB  ASP A 131      18.203 -23.811-160.800  1.00  0.00           C  
ATOM    998  CG  ASP A 131      16.930 -24.284-160.113  1.00  0.00           C  
ATOM    999  OD1 ASP A 131      16.298 -23.487-159.461  1.00  0.00           O  
ATOM   1000  OD2 ASP A 131      16.601 -25.439-160.246  1.00  0.00           O1-
ATOM   1001  N   THR A 132      20.748 -23.033-158.290  1.00  0.00           N  
ATOM   1002  CA  THR A 132      21.384 -23.603-157.125  1.00  0.00           C  
ATOM   1003  C   THR A 132      21.873 -22.535-156.163  1.00  0.00           C  
ATOM   1004  O   THR A 132      22.505 -21.568-156.570  1.00  0.00           O  
ATOM   1005  CB  THR A 132      22.562 -24.506-157.533  1.00  0.00           C  
ATOM   1006  CG2 THR A 132      23.189 -25.152-156.307  1.00  0.00           C  
ATOM   1007  OG1 THR A 132      22.096 -25.530-158.423  1.00  0.00           O  
ATOM   1008  N   VAL A 133      21.574 -22.734-154.882  1.00  0.00           N  
ATOM   1009  CA  VAL A 133      21.999 -21.842-153.817  1.00  0.00           C  
ATOM   1010  C   VAL A 133      22.704 -22.703-152.776  1.00  0.00           C  
ATOM   1011  O   VAL A 133      22.533 -23.911-152.773  1.00  0.00           O  
ATOM   1012  CB  VAL A 133      20.802 -21.106-153.187  1.00  0.00           C  
ATOM   1013  CG1 VAL A 133      20.094 -20.252-154.228  1.00  0.00           C  
ATOM   1014  CG2 VAL A 133      19.841 -22.112-152.572  1.00  0.00           C  
ATOM   1015  N   ALA A 134      23.487 -22.095-151.896  1.00  0.00           N  
ATOM   1016  CA  ALA A 134      24.206 -22.857-150.872  1.00  0.00           C  
ATOM   1017  C   ALA A 134      24.251 -22.091-149.574  1.00  0.00           C  
ATOM   1018  O   ALA A 134      24.103 -20.868-149.558  1.00  0.00           O  
ATOM   1019  CB  ALA A 134      25.616 -23.194-151.336  1.00  0.00           C  
ATOM   1020  N   ASP A 135      24.451 -22.823-148.484  1.00  0.00           N  
ATOM   1021  CA  ASP A 135      24.511 -22.232-147.168  1.00  0.00           C  
ATOM   1022  C   ASP A 135      25.727 -21.351-147.009  1.00  0.00           C  
ATOM   1023  O   ASP A 135      26.857 -21.831-146.981  1.00  0.00           O  
ATOM   1024  CB  ASP A 135      24.523 -23.323-146.094  1.00  0.00           C  
ATOM   1025  CG  ASP A 135      24.477 -22.762-144.679  1.00  0.00           C  
ATOM   1026  OD1 ASP A 135      24.632 -21.573-144.527  1.00  0.00           O  
ATOM   1027  OD2 ASP A 135      24.286 -23.527-143.764  1.00  0.00           O1-
ATOM   1028  N   ALA A 136      25.490 -20.052-146.927  1.00  0.00           N  
ATOM   1029  CA  ALA A 136      26.580 -19.108-146.848  1.00  0.00           C  
ATOM   1030  C   ALA A 136      26.914 -19.114-145.365  1.00  0.00           C  
ATOM   1031  O   ALA A 136      26.499 -18.221-144.629  1.00  0.00           O  
ATOM   1032  CB  ALA A 136      26.199 -17.727-147.363  1.00  0.00           C  
ATOM   1033  N   LYS A 137      27.630 -20.151-144.927  1.00  0.00           N  
ATOM   1034  CA  LYS A 137      28.035 -20.288-143.524  1.00  0.00           C  
ATOM   1035  C   LYS A 137      29.284 -19.453-143.256  1.00  0.00           C  
ATOM   1036  O   LYS A 137      30.328 -19.647-143.888  1.00  0.00           O  
ATOM   1037  CB  LYS A 137      28.291 -21.754-143.171  1.00  0.00           C  
ATOM   1038  CG  LYS A 137      28.638 -21.998-141.708  1.00  0.00           C  
ATOM   1039  CD  LYS A 137      28.824 -23.481-141.424  1.00  0.00           C  
ATOM   1040  CE  LYS A 137      29.185 -23.724-139.966  1.00  0.00           C  
ATOM   1041  NZ  LYS A 137      29.369 -25.172-139.673  1.00  0.00           N1+
ATOM   1042  N   ASP A 138      29.186 -18.525-142.316  1.00  0.00           N  
ATOM   1043  CA  ASP A 138      30.351 -17.730-141.958  1.00  0.00           C  
ATOM   1044  C   ASP A 138      30.314 -17.255-140.509  1.00  0.00           C  
ATOM   1045  O   ASP A 138      31.225 -16.555-140.067  1.00  0.00           O  
ATOM   1046  CB  ASP A 138      30.467 -16.520-142.889  1.00  0.00           C  
ATOM   1047  CG  ASP A 138      29.288 -15.564-142.767  1.00  0.00           C  
ATOM   1048  OD1 ASP A 138      28.522 -15.711-141.843  1.00  0.00           O  
ATOM   1049  OD2 ASP A 138      29.163 -14.697-143.599  1.00  0.00           O1-
ATOM   1050  N   GLY A 139      29.258 -17.618-139.785  1.00  0.00           N  
ATOM   1051  CA  GLY A 139      29.166 -17.273-138.372  1.00  0.00           C  
ATOM   1052  C   GLY A 139      28.239 -16.137-137.964  1.00  0.00           C  
ATOM   1053  O   GLY A 139      28.037 -15.910-136.770  1.00  0.00           O  
ATOM   1054  N   LYS A 140      27.666 -15.424-138.926  1.00  0.00           N  
ATOM   1055  CA  LYS A 140      26.750 -14.336-138.602  1.00  0.00           C  
ATOM   1056  C   LYS A 140      25.271 -14.670-138.921  1.00  0.00           C  
ATOM   1057  O   LYS A 140      24.450 -13.779-139.153  1.00  0.00           O  
ATOM   1058  CB  LYS A 140      27.174 -13.071-139.350  1.00  0.00           C  
ATOM   1059  CG  LYS A 140      28.572 -12.575-139.005  1.00  0.00           C  
ATOM   1060  CD  LYS A 140      28.661 -12.143-137.548  1.00  0.00           C  
ATOM   1061  CE  LYS A 140      30.036 -11.580-137.220  1.00  0.00           C  
ATOM   1062  NZ  LYS A 140      30.154 -11.200-135.786  1.00  0.00           N1+
ATOM   1063  N   GLU A 141      24.931 -15.950-138.918  1.00  0.00           N  
ATOM   1064  CA  GLU A 141      23.557 -16.352-139.191  1.00  0.00           C  
ATOM   1065  C   GLU A 141      22.638 -16.064-138.018  1.00  0.00           C  
ATOM   1066  O   GLU A 141      22.984 -16.344-136.878  1.00  0.00           O  
ATOM   1067  CB  GLU A 141      23.500 -17.842-139.535  1.00  0.00           C  
ATOM   1068  CG  GLU A 141      24.443 -18.267-140.651  1.00  0.00           C  
ATOM   1069  CD  GLU A 141      25.843 -18.524-140.168  1.00  0.00           C  
ATOM   1070  OE1 GLU A 141      26.012 -18.766-138.997  1.00  0.00           O  
ATOM   1071  OE2 GLU A 141      26.745 -18.479-140.972  1.00  0.00           O1-
ATOM   1072  N   ILE A 142      21.465 -15.504-138.297  1.00  0.00           N  
ATOM   1073  CA  ILE A 142      20.501 -15.260-137.246  1.00  0.00           C  
ATOM   1074  C   ILE A 142      19.952 -16.631-136.858  1.00  0.00           C  
ATOM   1075  O   ILE A 142      19.570 -17.417-137.708  1.00  0.00           O  
ATOM   1076  CB  ILE A 142      19.369 -14.320-137.703  1.00  0.00           C  
ATOM   1077  CG1 ILE A 142      19.924 -12.927-138.011  1.00  0.00           C  
ATOM   1078  CG2 ILE A 142      18.283 -14.241-136.641  1.00  0.00           C  
ATOM   1079  CD1 ILE A 142      18.935 -12.014-138.699  1.00  0.00           C  
ATOM   1080  N   ASP A 143      19.934 -16.888-135.559  1.00  0.00           N  
ATOM   1081  CA  ASP A 143      19.416 -18.105-134.955  1.00  0.00           C  
ATOM   1082  C   ASP A 143      17.923 -18.293-135.116  1.00  0.00           C  
ATOM   1083  O   ASP A 143      17.157 -17.331-135.074  1.00  0.00           O  
ATOM   1084  CB  ASP A 143      19.761 -18.128-133.464  1.00  0.00           C  
ATOM   1085  CG  ASP A 143      19.484 -19.476-132.813  1.00  0.00           C  
ATOM   1086  OD1 ASP A 143      20.392 -20.267-132.720  1.00  0.00           O  
ATOM   1087  OD2 ASP A 143      18.366 -19.702-132.415  1.00  0.00           O1-
ATOM   1088  N   THR A 144      17.499 -19.535-135.281  1.00  0.00           N  
ATOM   1089  CA  THR A 144      16.077 -19.819-135.458  1.00  0.00           C  
ATOM   1090  C   THR A 144      15.164 -19.214-134.386  1.00  0.00           C  
ATOM   1091  O   THR A 144      14.048 -18.789-134.682  1.00  0.00           O  
ATOM   1092  CB  THR A 144      15.847 -21.341-135.507  1.00  0.00           C  
ATOM   1093  CG2 THR A 144      14.365 -21.651-135.656  1.00  0.00           C  
ATOM   1094  OG1 THR A 144      16.562 -21.900-136.617  1.00  0.00           O  
ATOM   1095  N   LYS A 145      15.628 -19.165-133.146  1.00  0.00           N  
ATOM   1096  CA  LYS A 145      14.793 -18.615-132.090  1.00  0.00           C  
ATOM   1097  C   LYS A 145      14.417 -17.156-132.292  1.00  0.00           C  
ATOM   1098  O   LYS A 145      13.428 -16.693-131.732  1.00  0.00           O  
ATOM   1099  CB  LYS A 145      15.496 -18.777-130.742  1.00  0.00           C  
ATOM   1100  CG  LYS A 145      15.594 -20.215-130.251  1.00  0.00           C  
ATOM   1101  CD  LYS A 145      16.311 -20.295-128.912  1.00  0.00           C  
ATOM   1102  CE  LYS A 145      16.406 -21.731-128.418  1.00  0.00           C  
ATOM   1103  NZ  LYS A 145      17.138 -21.829-127.126  1.00  0.00           N1+
ATOM   1104  N   HIS A 146      15.183 -16.435-133.105  1.00  0.00           N  
ATOM   1105  CA  HIS A 146      14.858 -15.042-133.401  1.00  0.00           C  
ATOM   1106  C   HIS A 146      14.222 -14.835-134.764  1.00  0.00           C  
ATOM   1107  O   HIS A 146      14.034 -13.699-135.210  1.00  0.00           O  
ATOM   1108  CB  HIS A 146      16.120 -14.178-133.306  1.00  0.00           C  
ATOM   1109  CG  HIS A 146      16.726 -14.147-131.937  1.00  0.00           C  
ATOM   1110  CD2 HIS A 146      17.856 -14.710-131.449  1.00  0.00           C  
ATOM   1111  ND1 HIS A 146      16.150 -13.466-130.885  1.00  0.00           N  
ATOM   1112  CE1 HIS A 146      16.901 -13.614-129.807  1.00  0.00           C  
ATOM   1113  NE2 HIS A 146      17.941 -14.363-130.123  1.00  0.00           N  
ATOM   1114  N   LEU A 147      13.867 -15.924-135.426  1.00  0.00           N  
ATOM   1115  CA  LEU A 147      13.224 -15.813-136.721  1.00  0.00           C  
ATOM   1116  C   LEU A 147      11.718 -16.023-136.691  1.00  0.00           C  
ATOM   1117  O   LEU A 147      11.215 -16.962-136.070  1.00  0.00           O  
ATOM   1118  CB  LEU A 147      13.851 -16.826-137.686  1.00  0.00           C  
ATOM   1119  CG  LEU A 147      15.355 -16.659-137.941  1.00  0.00           C  
ATOM   1120  CD1 LEU A 147      15.846 -17.786-138.840  1.00  0.00           C  
ATOM   1121  CD2 LEU A 147      15.615 -15.301-138.575  1.00  0.00           C  
ATOM   1122  N   PRO A 148      10.975 -15.135-137.363  1.00  0.00           N  
ATOM   1123  CA  PRO A 148       9.530 -15.262-137.544  1.00  0.00           C  
ATOM   1124  C   PRO A 148       9.204 -16.620-138.152  1.00  0.00           C  
ATOM   1125  O   PRO A 148      10.061 -17.280-138.736  1.00  0.00           O  
ATOM   1126  CB  PRO A 148       9.189 -14.113-138.499  1.00  0.00           C  
ATOM   1127  CG  PRO A 148      10.266 -13.110-138.264  1.00  0.00           C  
ATOM   1128  CD  PRO A 148      11.505 -13.937-138.043  1.00  0.00           C  
ATOM   1129  N   SER A 149       7.951 -17.021-138.028  1.00  0.00           N  
ATOM   1130  CA  SER A 149       7.516 -18.325-138.509  1.00  0.00           C  
ATOM   1131  C   SER A 149       7.621 -18.306-140.046  1.00  0.00           C  
ATOM   1132  O   SER A 149       7.710 -19.349-140.699  1.00  0.00           O  
ATOM   1133  CB  SER A 149       6.098 -18.623-138.064  1.00  0.00           C  
ATOM   1134  OG  SER A 149       5.183 -17.776-138.704  1.00  0.00           O  
ATOM   1135  N   THR A 150       7.612 -17.101-140.613  1.00  0.00           N  
ATOM   1136  CA  THR A 150       7.753 -16.932-142.046  1.00  0.00           C  
ATOM   1137  C   THR A 150       9.197 -16.990-142.492  1.00  0.00           C  
ATOM   1138  O   THR A 150       9.462 -16.955-143.685  1.00  0.00           O  
ATOM   1139  CB  THR A 150       7.132 -15.600-142.503  1.00  0.00           C  
ATOM   1140  CG2 THR A 150       5.659 -15.542-142.131  1.00  0.00           C  
ATOM   1141  OG1 THR A 150       7.822 -14.509-141.880  1.00  0.00           O  
ATOM   1142  N   CYS A 151      10.141 -17.055-141.558  1.00  0.00           N  
ATOM   1143  CA  CYS A 151      11.545 -17.093-141.959  1.00  0.00           C  
ATOM   1144  C   CYS A 151      12.224 -18.314-141.379  1.00  0.00           C  
ATOM   1145  O   CYS A 151      13.105 -18.212-140.532  1.00  0.00           O  
ATOM   1146  CB  CYS A 151      12.282 -15.836-141.496  1.00  0.00           C  
ATOM   1147  SG  CYS A 151      14.012 -15.760-142.018  1.00  0.00           S  
ATOM   1148  N   ARG A 152      11.801 -19.481-141.853  1.00  0.00           N  
ATOM   1149  CA  ARG A 152      12.259 -20.755-141.310  1.00  0.00           C  
ATOM   1150  C   ARG A 152      12.679 -21.677-142.442  1.00  0.00           C  
ATOM   1151  O   ARG A 152      12.598 -22.886-142.284  1.00  0.00           O  
ATOM   1152  CB  ARG A 152      11.166 -21.422-140.487  1.00  0.00           C  
ATOM   1153  CG  ARG A 152      10.645 -20.593-139.324  1.00  0.00           C  
ATOM   1154  CD  ARG A 152      11.675 -20.419-138.268  1.00  0.00           C  
ATOM   1155  NE  ARG A 152      11.168 -19.660-137.136  1.00  0.00           N  
ATOM   1156  CZ  ARG A 152      10.480 -20.189-136.106  1.00  0.00           C  
ATOM   1157  NH1 ARG A 152      10.225 -21.479-136.079  1.00  0.00           N1+
ATOM   1158  NH2 ARG A 152      10.061 -19.412-135.122  1.00  0.00           N  
ATOM   1159  N   ASP A 153      13.120 -21.133-143.574  1.00  0.00           N  
ATOM   1160  CA  ASP A 153      13.495 -21.974-144.715  1.00  0.00           C  
ATOM   1161  C   ASP A 153      14.982 -22.360-144.852  1.00  0.00           C  
ATOM   1162  O   ASP A 153      15.876 -21.614-144.464  1.00  0.00           O  
ATOM   1163  CB  ASP A 153      13.060 -21.270-146.002  1.00  0.00           C  
ATOM   1164  CG  ASP A 153      11.547 -21.157-146.134  1.00  0.00           C  
ATOM   1165  OD1 ASP A 153      10.866 -22.073-145.737  1.00  0.00           O  
ATOM   1166  OD2 ASP A 153      11.087 -20.157-146.630  1.00  0.00           O1-
ATOM   1167  N   ASN A 154      15.218 -23.530-145.428  1.00  0.00           N  
ATOM   1168  CA  ASN A 154      16.564 -24.045-145.695  1.00  0.00           C  
ATOM   1169  C   ASN A 154      16.941 -23.873-147.171  1.00  0.00           C  
ATOM   1170  O   ASN A 154      16.095 -23.944-148.063  1.00  0.00           O  
ATOM   1171  CB  ASN A 154      16.670 -25.502-145.283  1.00  0.00           C  
ATOM   1172  CG  ASN A 154      16.536 -25.694-143.798  1.00  0.00           C  
ATOM   1173  ND2 ASN A 154      15.819 -26.715-143.403  1.00  0.00           N  
ATOM   1174  OD1 ASN A 154      17.083 -24.916-143.008  1.00  0.00           O  
ATOM   1175  N   PHE A 155      18.224 -23.651-147.415  1.00  0.00           N  
ATOM   1176  CA  PHE A 155      18.715 -23.403-148.755  1.00  0.00           C  
ATOM   1177  C   PHE A 155      18.405 -24.553-149.724  1.00  0.00           C  
ATOM   1178  O   PHE A 155      18.292 -24.345-150.938  1.00  0.00           O  
ATOM   1179  CB  PHE A 155      20.224 -23.159-148.713  1.00  0.00           C  
ATOM   1180  CG  PHE A 155      21.038 -24.415-148.587  1.00  0.00           C  
ATOM   1181  CD1 PHE A 155      21.509 -25.069-149.715  1.00  0.00           C  
ATOM   1182  CD2 PHE A 155      21.334 -24.945-147.340  1.00  0.00           C  
ATOM   1183  CE1 PHE A 155      22.258 -26.225-149.600  1.00  0.00           C  
ATOM   1184  CE2 PHE A 155      22.083 -26.100-147.222  1.00  0.00           C  
ATOM   1185  CZ  PHE A 155      22.545 -26.741-148.354  1.00  0.00           C  
ATOM   1186  N   ASP A 156      18.257 -25.772-149.207  1.00  0.00           N  
ATOM   1187  CA  ASP A 156      17.934 -26.896-150.091  1.00  0.00           C  
ATOM   1188  C   ASP A 156      16.445 -27.171-150.294  1.00  0.00           C  
ATOM   1189  O   ASP A 156      16.068 -28.213-150.828  1.00  0.00           O  
ATOM   1190  CB  ASP A 156      18.595 -28.168-149.553  1.00  0.00           C  
ATOM   1191  CG  ASP A 156      18.071 -28.574-148.182  1.00  0.00           C  
ATOM   1192  OD1 ASP A 156      17.266 -27.855-147.639  1.00  0.00           O  
ATOM   1193  OD2 ASP A 156      18.481 -29.599-147.692  1.00  0.00           O1-
ATOM   1194  N   ALA A 157      15.599 -26.245-149.868  1.00  0.00           N  
ATOM   1195  CA  ALA A 157      14.170 -26.411-150.056  1.00  0.00           C  
ATOM   1196  C   ALA A 157      13.859 -26.212-151.534  1.00  0.00           C  
ATOM   1197  O   ALA A 157      14.543 -25.459-152.220  1.00  0.00           O  
ATOM   1198  CB  ALA A 157      13.385 -25.440-149.187  1.00  0.00           C  
ATOM   1199  N   LYS A 158      12.840 -26.894-152.041  1.00  0.00           N  
ATOM   1200  CA  LYS A 158      12.526 -26.766-153.456  1.00  0.00           C  
ATOM   1201  C   LYS A 158      11.044 -26.476-153.583  1.00  0.00           C  
ATOM   1202  O   LYS A 158      10.326 -26.752-152.603  1.00  0.00           O  
ATOM   1203  CB  LYS A 158      12.900 -28.031-154.231  1.00  0.00           C  
ATOM   1204  CG  LYS A 158      12.635 -27.953-155.728  1.00  0.00           C  
ATOM   1205  CD  LYS A 158      13.057 -29.235-156.431  1.00  0.00           C  
ATOM   1206  CE  LYS A 158      12.766 -29.170-157.924  1.00  0.00           C  
ATOM   1207  NZ  LYS A 158      13.154 -30.426-158.621  1.00  0.00           N1+
ATOM   1208  OXT LYS A 158      10.611 -26.000-154.596  1.00  0.00           O1-
TER    1209      LYS A 158 
ATOM   1210  N   PHE B   1       3.262   8.807 -75.782  1.00  0.00           N  
ATOM   1211  CA  PHE B   1       3.063   7.675 -74.826  1.00  0.00           C  
ATOM   1212  C   PHE B   1       2.853   6.328 -75.524  1.00  0.00           C  
ATOM   1213  O   PHE B   1       3.285   5.294 -75.012  1.00  0.00           O  
ATOM   1214  CB  PHE B   1       1.863   7.951 -73.917  1.00  0.00           C  
ATOM   1215  CG  PHE B   1       2.050   9.133 -73.009  1.00  0.00           C  
ATOM   1216  CD1 PHE B   1       3.242   9.842 -73.006  1.00  0.00           C  
ATOM   1217  CD2 PHE B   1       1.036   9.536 -72.154  1.00  0.00           C  
ATOM   1218  CE1 PHE B   1       3.415  10.930 -72.170  1.00  0.00           C  
ATOM   1219  CE2 PHE B   1       1.205  10.623 -71.318  1.00  0.00           C  
ATOM   1220  CZ  PHE B   1       2.397  11.320 -71.327  1.00  0.00           C  
ATOM   1221  N   THR B   2       2.212   6.342 -76.699  1.00  0.00           N  
ATOM   1222  CA  THR B   2       1.969   5.108 -77.460  1.00  0.00           C  
ATOM   1223  C   THR B   2       1.771   5.236 -78.979  1.00  0.00           C  
ATOM   1224  O   THR B   2       2.600   4.776 -79.769  1.00  0.00           O  
ATOM   1225  CB  THR B   2       0.739   4.387 -76.879  1.00  0.00           C  
ATOM   1226  CG2 THR B   2       0.439   3.122 -77.668  1.00  0.00           C  
ATOM   1227  OG1 THR B   2       0.986   4.044 -75.509  1.00  0.00           O  
ATOM   1228  N   LEU B   3       0.656   5.860 -79.361  1.00  0.00           N  
ATOM   1229  CA  LEU B   3       0.244   5.998 -80.762  1.00  0.00           C  
ATOM   1230  C   LEU B   3       1.094   6.957 -81.601  1.00  0.00           C  
ATOM   1231  O   LEU B   3       0.645   8.057 -81.948  1.00  0.00           O  
ATOM   1232  CB  LEU B   3      -1.217   6.464 -80.811  1.00  0.00           C  
ATOM   1233  CG  LEU B   3      -1.818   6.620 -82.214  1.00  0.00           C  
ATOM   1234  CD1 LEU B   3      -1.855   5.263 -82.905  1.00  0.00           C  
ATOM   1235  CD2 LEU B   3      -3.214   7.216 -82.104  1.00  0.00           C  
ATOM   1236  N   ILE B   4       2.313   6.536 -81.936  1.00  0.00           N  
ATOM   1237  CA  ILE B   4       3.163   7.317 -82.836  1.00  0.00           C  
ATOM   1238  C   ILE B   4       3.591   6.531 -84.087  1.00  0.00           C  
ATOM   1239  O   ILE B   4       3.973   7.124 -85.097  1.00  0.00           O  
ATOM   1240  CB  ILE B   4       4.418   7.808 -82.093  1.00  0.00           C  
ATOM   1241  CG1 ILE B   4       5.258   6.619 -81.619  1.00  0.00           C  
ATOM   1242  CG2 ILE B   4       4.029   8.690 -80.917  1.00  0.00           C  
ATOM   1243  CD1 ILE B   4       6.619   7.006 -81.087  1.00  0.00           C  
ATOM   1244  N   GLU B   5       3.505   5.203 -84.012  1.00  0.00           N  
ATOM   1245  CA  GLU B   5       3.913   4.326 -85.106  1.00  0.00           C  
ATOM   1246  C   GLU B   5       2.959   4.449 -86.296  1.00  0.00           C  
ATOM   1247  O   GLU B   5       3.393   4.465 -87.446  1.00  0.00           O  
ATOM   1248  CB  GLU B   5       3.969   2.872 -84.631  1.00  0.00           C  
ATOM   1249  CG  GLU B   5       5.091   2.575 -83.646  1.00  0.00           C  
ATOM   1250  CD  GLU B   5       5.086   1.151 -83.166  1.00  0.00           C  
ATOM   1251  OE1 GLU B   5       4.145   0.450 -83.453  1.00  0.00           O  
ATOM   1252  OE2 GLU B   5       6.025   0.763 -82.511  1.00  0.00           O1-
ATOM   1253  N   LEU B   6       1.662   4.536 -86.008  1.00  0.00           N  
ATOM   1254  CA  LEU B   6       0.645   4.757 -87.034  1.00  0.00           C  
ATOM   1255  C   LEU B   6       0.921   6.042 -87.811  1.00  0.00           C  
ATOM   1256  O   LEU B   6       0.900   6.046 -89.042  1.00  0.00           O  
ATOM   1257  CB  LEU B   6      -0.748   4.825 -86.397  1.00  0.00           C  
ATOM   1258  CG  LEU B   6      -1.913   5.063 -87.367  1.00  0.00           C  
ATOM   1259  CD1 LEU B   6      -2.002   3.902 -88.348  1.00  0.00           C  
ATOM   1260  CD2 LEU B   6      -3.206   5.215 -86.580  1.00  0.00           C  
ATOM   1261  N   MET B   7       1.185   7.125 -87.079  1.00  0.00           N  
ATOM   1262  CA  MET B   7       1.571   8.406 -87.669  1.00  0.00           C  
ATOM   1263  C   MET B   7       2.798   8.302 -88.580  1.00  0.00           C  
ATOM   1264  O   MET B   7       2.774   8.793 -89.708  1.00  0.00           O  
ATOM   1265  CB  MET B   7       1.828   9.424 -86.560  1.00  0.00           C  
ATOM   1266  CG  MET B   7       2.325  10.777 -87.050  1.00  0.00           C  
ATOM   1267  SD  MET B   7       2.783  11.880 -85.698  1.00  0.00           S  
ATOM   1268  CE  MET B   7       4.243  11.057 -85.070  1.00  0.00           C  
ATOM   1269  N   ILE B   8       3.864   7.673 -88.086  1.00  0.00           N  
ATOM   1270  CA  ILE B   8       5.091   7.527 -88.872  1.00  0.00           C  
ATOM   1271  C   ILE B   8       4.843   6.758 -90.171  1.00  0.00           C  
ATOM   1272  O   ILE B   8       5.244   7.209 -91.245  1.00  0.00           O  
ATOM   1273  CB  ILE B   8       6.181   6.810 -88.053  1.00  0.00           C  
ATOM   1274  CG1 ILE B   8       6.649   7.695 -86.896  1.00  0.00           C  
ATOM   1275  CG2 ILE B   8       7.353   6.431 -88.945  1.00  0.00           C  
ATOM   1276  CD1 ILE B   8       7.481   6.965 -85.866  1.00  0.00           C  
ATOM   1277  N   VAL B   9       4.159   5.616 -90.078  1.00  0.00           N  
ATOM   1278  CA  VAL B   9       3.816   4.818 -91.260  1.00  0.00           C  
ATOM   1279  C   VAL B   9       2.947   5.582 -92.280  1.00  0.00           C  
ATOM   1280  O   VAL B   9       3.233   5.554 -93.478  1.00  0.00           O  
ATOM   1281  CB  VAL B   9       3.072   3.542 -90.823  1.00  0.00           C  
ATOM   1282  CG1 VAL B   9       2.484   2.828 -92.032  1.00  0.00           C  
ATOM   1283  CG2 VAL B   9       4.018   2.625 -90.063  1.00  0.00           C  
ATOM   1284  N   ILE B  10       1.909   6.273 -91.812  1.00  0.00           N  
ATOM   1285  CA  ILE B  10       1.061   7.054 -92.718  1.00  0.00           C  
ATOM   1286  C   ILE B  10       1.884   8.137 -93.429  1.00  0.00           C  
ATOM   1287  O   ILE B  10       1.747   8.340 -94.639  1.00  0.00           O  
ATOM   1288  CB  ILE B  10      -0.108   7.706 -91.957  1.00  0.00           C  
ATOM   1289  CG1 ILE B  10      -1.096   6.639 -91.480  1.00  0.00           C  
ATOM   1290  CG2 ILE B  10      -0.809   8.731 -92.836  1.00  0.00           C  
ATOM   1291  CD1 ILE B  10      -2.120   7.153 -90.494  1.00  0.00           C  
ATOM   1292  N   ALA B  11       2.748   8.806 -92.668  1.00  0.00           N  
ATOM   1293  CA  ALA B  11       3.642   9.831 -93.201  1.00  0.00           C  
ATOM   1294  C   ALA B  11       4.617   9.296 -94.254  1.00  0.00           C  
ATOM   1295  O   ALA B  11       4.882   9.971 -95.251  1.00  0.00           O  
ATOM   1296  CB  ALA B  11       4.411  10.483 -92.061  1.00  0.00           C  
ATOM   1297  N   ILE B  12       5.158   8.099 -94.029  1.00  0.00           N  
ATOM   1298  CA  ILE B  12       6.072   7.484 -94.998  1.00  0.00           C  
ATOM   1299  C   ILE B  12       5.356   7.166 -96.310  1.00  0.00           C  
ATOM   1300  O   ILE B  12       5.892   7.427 -97.387  1.00  0.00           O  
ATOM   1301  CB  ILE B  12       6.692   6.196 -94.427  1.00  0.00           C  
ATOM   1302  CG1 ILE B  12       7.649   6.527 -93.279  1.00  0.00           C  
ATOM   1303  CG2 ILE B  12       7.414   5.424 -95.521  1.00  0.00           C  
ATOM   1304  CD1 ILE B  12       8.082   5.320 -92.478  1.00  0.00           C  
ATOM   1305  N   VAL B  13       4.156   6.597 -96.212  1.00  0.00           N  
ATOM   1306  CA  VAL B  13       3.329   6.300 -97.383  1.00  0.00           C  
ATOM   1307  C   VAL B  13       2.947   7.609 -98.082  1.00  0.00           C  
ATOM   1308  O   VAL B  13       2.995   7.705 -99.312  1.00  0.00           O  
ATOM   1309  CB  VAL B  13       2.056   5.536 -96.972  1.00  0.00           C  
ATOM   1310  CG1 VAL B  13       1.106   5.410 -98.154  1.00  0.00           C  
ATOM   1311  CG2 VAL B  13       2.428   4.165 -96.430  1.00  0.00           C  
ATOM   1312  N   GLY B  14       2.582   8.611 -97.283  1.00  0.00           N  
ATOM   1313  CA  GLY B  14       2.265   9.938 -97.783  1.00  0.00           C  
ATOM   1314  C   GLY B  14       3.366  10.503 -98.663  1.00  0.00           C  
ATOM   1315  O   GLY B  14       3.136  10.783 -99.844  1.00  0.00           O  
ATOM   1316  N   ILE B  15       4.561  10.666 -98.096  1.00  0.00           N  
ATOM   1317  CA  ILE B  15       5.687  11.256 -98.824  1.00  0.00           C  
ATOM   1318  C   ILE B  15       6.131  10.391-100.006  1.00  0.00           C  
ATOM   1319  O   ILE B  15       6.636  10.911-101.000  1.00  0.00           O  
ATOM   1320  CB  ILE B  15       6.884  11.480 -97.881  1.00  0.00           C  
ATOM   1321  CG1 ILE B  15       7.927  12.380 -98.548  1.00  0.00           C  
ATOM   1322  CG2 ILE B  15       7.502  10.149 -97.482  1.00  0.00           C  
ATOM   1323  CD1 ILE B  15       7.441  13.787 -98.811  1.00  0.00           C  
ATOM   1324  N   LEU B  16       5.938   9.077 -99.888  1.00  0.00           N  
ATOM   1325  CA  LEU B  16       6.227   8.142-100.980  1.00  0.00           C  
ATOM   1326  C   LEU B  16       5.404   8.499-102.214  1.00  0.00           C  
ATOM   1327  O   LEU B  16       5.945   8.599-103.317  1.00  0.00           O  
ATOM   1328  CB  LEU B  16       5.924   6.702-100.549  1.00  0.00           C  
ATOM   1329  CG  LEU B  16       6.133   5.628-101.624  1.00  0.00           C  
ATOM   1330  CD1 LEU B  16       7.598   5.602-102.039  1.00  0.00           C  
ATOM   1331  CD2 LEU B  16       5.694   4.275-101.084  1.00  0.00           C  
ATOM   1332  N   ALA B  17       4.100   8.687-102.013  1.00  0.00           N  
ATOM   1333  CA  ALA B  17       3.193   9.119-103.074  1.00  0.00           C  
ATOM   1334  C   ALA B  17       3.565  10.508-103.590  1.00  0.00           C  
ATOM   1335  O   ALA B  17       3.501  10.762-104.792  1.00  0.00           O  
ATOM   1336  CB  ALA B  17       1.754   9.101-102.579  1.00  0.00           C  
ATOM   1337  N   ALA B  18       3.956  11.391-102.671  1.00  0.00           N  
ATOM   1338  CA  ALA B  18       4.387  12.748-103.009  1.00  0.00           C  
ATOM   1339  C   ALA B  18       5.634  12.753-103.897  1.00  0.00           C  
ATOM   1340  O   ALA B  18       5.843  13.690-104.670  1.00  0.00           O  
ATOM   1341  CB  ALA B  18       4.640  13.548-101.740  1.00  0.00           C  
ATOM   1342  N   VAL B  19       6.456  11.713-103.769  1.00  0.00           N  
ATOM   1343  CA  VAL B  19       7.591  11.495-104.669  1.00  0.00           C  
ATOM   1344  C   VAL B  19       7.107  10.931-106.008  1.00  0.00           C  
ATOM   1345  O   VAL B  19       7.478  11.434-107.072  1.00  0.00           O  
ATOM   1346  CB  VAL B  19       8.604  10.524-104.035  1.00  0.00           C  
ATOM   1347  CG1 VAL B  19       9.644  10.096-105.059  1.00  0.00           C  
ATOM   1348  CG2 VAL B  19       9.268  11.179-102.833  1.00  0.00           C  
ATOM   1349  N   ALA B  20       6.270   9.897-105.949  1.00  0.00           N  
ATOM   1350  CA  ALA B  20       5.856   9.159-107.143  1.00  0.00           C  
ATOM   1351  C   ALA B  20       5.193  10.066-108.185  1.00  0.00           C  
ATOM   1352  O   ALA B  20       5.538  10.016-109.369  1.00  0.00           O  
ATOM   1353  CB  ALA B  20       4.919   8.024-106.755  1.00  0.00           C  
ATOM   1354  N   LEU B  21       4.248  10.891-107.734  1.00  0.00           N  
ATOM   1355  CA  LEU B  21       3.414  11.694-108.628  1.00  0.00           C  
ATOM   1356  C   LEU B  21       4.219  12.667-109.512  1.00  0.00           C  
ATOM   1357  O   LEU B  21       4.058  12.635-110.732  1.00  0.00           O  
ATOM   1358  CB  LEU B  21       2.396  12.487-107.798  1.00  0.00           C  
ATOM   1359  CG  LEU B  21       1.253  11.666-107.186  1.00  0.00           C  
ATOM   1360  CD1 LEU B  21       0.469  12.534-106.212  1.00  0.00           C  
ATOM   1361  CD2 LEU B  21       0.355  11.140-108.296  1.00  0.00           C  
ATOM   1362  N   PRO B  22       5.075  13.516-108.927  1.00  0.00           N  
ATOM   1363  CA  PRO B  22       5.891  14.442-109.726  1.00  0.00           C  
ATOM   1364  C   PRO B  22       6.975  13.754-110.559  1.00  0.00           C  
ATOM   1365  O   PRO B  22       7.403  14.324-111.561  1.00  0.00           O  
ATOM   1366  CB  PRO B  22       6.512  15.343-108.653  1.00  0.00           C  
ATOM   1367  CG  PRO B  22       6.556  14.484-107.436  1.00  0.00           C  
ATOM   1368  CD  PRO B  22       5.275  13.694-107.489  1.00  0.00           C  
ATOM   1369  N   ALA B  23       7.403  12.562-110.147  1.00  0.00           N  
ATOM   1370  CA  ALA B  23       8.288  11.725-110.958  1.00  0.00           C  
ATOM   1371  C   ALA B  23       7.605  11.291-112.254  1.00  0.00           C  
ATOM   1372  O   ALA B  23       8.221  11.308-113.320  1.00  0.00           O  
ATOM   1373  CB  ALA B  23       8.742  10.509-110.162  1.00  0.00           C  
ATOM   1374  N   TYR B  24       6.330  10.912-112.147  1.00  0.00           N  
ATOM   1375  CA  TYR B  24       5.504  10.561-113.300  1.00  0.00           C  
ATOM   1376  C   TYR B  24       5.260  11.786-114.185  1.00  0.00           C  
ATOM   1377  O   TYR B  24       5.170  11.664-115.408  1.00  0.00           O  
ATOM   1378  CB  TYR B  24       4.173   9.958-112.844  1.00  0.00           C  
ATOM   1379  CG  TYR B  24       4.292   8.544-112.319  1.00  0.00           C  
ATOM   1380  CD1 TYR B  24       3.811   8.230-111.056  1.00  0.00           C  
ATOM   1381  CD2 TYR B  24       4.883   7.562-113.100  1.00  0.00           C  
ATOM   1382  CE1 TYR B  24       3.919   6.939-110.577  1.00  0.00           C  
ATOM   1383  CE2 TYR B  24       4.991   6.271-112.621  1.00  0.00           C  
ATOM   1384  CZ  TYR B  24       4.512   5.958-111.365  1.00  0.00           C  
ATOM   1385  OH  TYR B  24       4.620   4.672-110.887  1.00  0.00           O  
ATOM   1386  N   GLN B  25       5.156  12.957-113.557  1.00  0.00           N  
ATOM   1387  CA  GLN B  25       5.031  14.227-114.277  1.00  0.00           C  
ATOM   1388  C   GLN B  25       6.310  14.609-115.019  1.00  0.00           C  
ATOM   1389  O   GLN B  25       6.249  15.199-116.098  1.00  0.00           O  
ATOM   1390  CB  GLN B  25       4.647  15.348-113.308  1.00  0.00           C  
ATOM   1391  CG  GLN B  25       3.247  15.218-112.730  1.00  0.00           C  
ATOM   1392  CD  GLN B  25       2.170  15.325-113.793  1.00  0.00           C  
ATOM   1393  NE2 GLN B  25       1.172  14.453-113.713  1.00  0.00           N  
ATOM   1394  OE1 GLN B  25       2.235  16.184-114.677  1.00  0.00           O  
ATOM   1395  N   ASP B  26       7.462  14.286-114.434  1.00  0.00           N  
ATOM   1396  CA  ASP B  26       8.659  14.784-115.625  1.00  0.00           C  
ATOM   1397  C   ASP B  26       8.559  13.815-116.782  1.00  0.00           C  
ATOM   1398  O   ASP B  26       8.799  14.190-117.924  1.00  0.00           O  
ATOM   1399  CB  ASP B  26      10.114  14.752-115.151  1.00  0.00           C  
ATOM   1400  CG  ASP B  26      10.435  15.855-114.151  1.00  0.00           C  
ATOM   1401  OD1 ASP B  26       9.602  16.707-113.948  1.00  0.00           O  
ATOM   1402  OD2 ASP B  26      11.510  15.836-113.601  1.00  0.00           O1-
ATOM   1403  N   TYR B  27       8.201  12.572-116.492  1.00  0.00           N  
ATOM   1404  CA  TYR B  27       8.126  11.577-117.541  1.00  0.00           C  
ATOM   1405  C   TYR B  27       7.078  12.117-118.487  1.00  0.00           C  
ATOM   1406  O   TYR B  27       7.296  12.253-119.690  1.00  0.00           O  
ATOM   1407  CB  TYR B  27       7.758  10.190-117.009  1.00  0.00           C  
ATOM   1408  CG  TYR B  27       7.539   9.158-118.093  1.00  0.00           C  
ATOM   1409  CD1 TYR B  27       8.628   8.549-118.701  1.00  0.00           C  
ATOM   1410  CD2 TYR B  27       6.251   8.821-118.479  1.00  0.00           C  
ATOM   1411  CE1 TYR B  27       8.428   7.606-119.691  1.00  0.00           C  
ATOM   1412  CE2 TYR B  27       6.051   7.878-119.469  1.00  0.00           C  
ATOM   1413  CZ  TYR B  27       7.134   7.272-120.074  1.00  0.00           C  
ATOM   1414  OH  TYR B  27       6.934   6.334-121.060  1.00  0.00           O  
ATOM   1415  N   THR B  28       5.935  12.441-117.908  1.00  0.00           N  
ATOM   1416  CA  THR B  28       4.789  12.884-118.665  1.00  0.00           C  
ATOM   1417  C   THR B  28       5.110  14.059-119.585  1.00  0.00           C  
ATOM   1418  O   THR B  28       4.684  14.085-120.741  1.00  0.00           O  
ATOM   1419  CB  THR B  28       3.637  13.272-117.719  1.00  0.00           C  
ATOM   1420  CG2 THR B  28       2.454  13.808-118.510  1.00  0.00           C  
ATOM   1421  OG1 THR B  28       3.224  12.123-116.968  1.00  0.00           O  
ATOM   1422  N   ALA B  29       5.863  15.028-119.083  1.00  0.00           N  
ATOM   1423  CA  ALA B  29       6.233  16.200-119.878  1.00  0.00           C  
ATOM   1424  C   ALA B  29       6.831  15.784-121.207  1.00  0.00           C  
ATOM   1425  O   ALA B  29       6.435  16.269-122.265  1.00  0.00           O  
ATOM   1426  CB  ALA B  29       7.205  17.083-119.110  1.00  0.00           C  
ATOM   1427  N   ARG B  30       7.797  14.879-121.128  1.00  0.00           N  
ATOM   1428  CA  ARG B  30       8.495  14.364-122.286  1.00  0.00           C  
ATOM   1429  C   ARG B  30       7.523  13.578-123.135  1.00  0.00           C  
ATOM   1430  O   ARG B  30       7.547  13.670-124.355  1.00  0.00           O  
ATOM   1431  CB  ARG B  30       9.661  13.476-121.877  1.00  0.00           C  
ATOM   1432  CG  ARG B  30      10.524  12.983-123.028  1.00  0.00           C  
ATOM   1433  CD  ARG B  30      11.705  12.224-122.542  1.00  0.00           C  
ATOM   1434  NE  ARG B  30      12.570  13.042-121.708  1.00  0.00           N  
ATOM   1435  CZ  ARG B  30      13.344  12.568-120.713  1.00  0.00           C  
ATOM   1436  NH1 ARG B  30      13.350  11.282-120.440  1.00  0.00           N1+
ATOM   1437  NH2 ARG B  30      14.098  13.396-120.010  1.00  0.00           N  
ATOM   1438  N   ALA B  31       6.663  12.806-122.478  1.00  0.00           N  
ATOM   1439  CA  ALA B  31       5.669  11.987-123.176  1.00  0.00           C  
ATOM   1440  C   ALA B  31       4.734  12.859-124.020  1.00  0.00           C  
ATOM   1441  O   ALA B  31       4.358  12.491-125.132  1.00  0.00           O  
ATOM   1442  CB  ALA B  31       4.871  11.156-122.182  1.00  0.00           C  
ATOM   1443  N   GLN B  32       4.381  14.020-123.474  1.00  0.00           N  
ATOM   1444  CA  GLN B  32       3.564  15.014-124.164  1.00  0.00           C  
ATOM   1445  C   GLN B  32       4.261  15.520-125.428  1.00  0.00           C  
ATOM   1446  O   GLN B  32       3.627  15.714-126.466  1.00  0.00           O  
ATOM   1447  CB  GLN B  32       3.250  16.188-123.233  1.00  0.00           C  
ATOM   1448  CG  GLN B  32       2.313  15.841-122.088  1.00  0.00           C  
ATOM   1449  CD  GLN B  32       2.050  17.025-121.177  1.00  0.00           C  
ATOM   1450  NE2 GLN B  32       0.925  16.989-120.472  1.00  0.00           N  
ATOM   1451  OE1 GLN B  32       2.849  17.963-121.107  1.00  0.00           O  
ATOM   1452  N   VAL B  33       5.561  15.760-125.329  1.00  0.00           N  
ATOM   1453  CA  VAL B  33       6.335  16.199-126.473  1.00  0.00           C  
ATOM   1454  C   VAL B  33       6.330  15.092-127.511  1.00  0.00           C  
ATOM   1455  O   VAL B  33       6.164  15.345-128.704  1.00  0.00           O  
ATOM   1456  CB  VAL B  33       7.782  16.535-126.065  1.00  0.00           C  
ATOM   1457  CG1 VAL B  33       8.636  16.797-127.296  1.00  0.00           C  
ATOM   1458  CG2 VAL B  33       7.791  17.739-125.136  1.00  0.00           C  
ATOM   1459  N   SER B  34       6.510  13.859-127.050  1.00  0.00           N  
ATOM   1460  CA  SER B  34       6.649  12.734-127.958  1.00  0.00           C  
ATOM   1461  C   SER B  34       5.388  12.532-128.778  1.00  0.00           C  
ATOM   1462  O   SER B  34       5.441  12.044-129.910  1.00  0.00           O  
ATOM   1463  CB  SER B  34       6.964  11.471-127.180  1.00  0.00           C  
ATOM   1464  OG  SER B  34       5.845  11.032-126.460  1.00  0.00           O  
ATOM   1465  N   GLU B  35       4.253  12.905-128.203  1.00  0.00           N  
ATOM   1466  CA  GLU B  35       3.012  12.907-128.954  1.00  0.00           C  
ATOM   1467  C   GLU B  35       3.079  13.866-130.108  1.00  0.00           C  
ATOM   1468  O   GLU B  35       2.672  13.535-131.219  1.00  0.00           O  
ATOM   1469  CB  GLU B  35       1.834  13.275-128.049  1.00  0.00           C  
ATOM   1470  CG  GLU B  35       0.475  13.220-128.732  1.00  0.00           C  
ATOM   1471  CD  GLU B  35      -0.653  13.624-127.823  1.00  0.00           C  
ATOM   1472  OE1 GLU B  35      -0.459  14.506-127.022  1.00  0.00           O  
ATOM   1473  OE2 GLU B  35      -1.711  13.049-127.931  1.00  0.00           O1-
ATOM   1474  N   ALA B  36       3.588  15.059-129.845  1.00  0.00           N  
ATOM   1475  CA  ALA B  36       3.617  16.080-130.870  1.00  0.00           C  
ATOM   1476  C   ALA B  36       4.466  15.476-131.977  1.00  0.00           C  
ATOM   1477  O   ALA B  36       4.130  15.550-133.162  1.00  0.00           O  
ATOM   1478  CB  ALA B  36       4.183  17.395-130.356  1.00  0.00           C  
ATOM   1479  N   ILE B  37       5.562  14.847-131.572  1.00  0.00           N  
ATOM   1480  CA  ILE B  37       6.503  14.280-132.512  1.00  0.00           C  
ATOM   1481  C   ILE B  37       5.861  13.193-133.363  1.00  0.00           C  
ATOM   1482  O   ILE B  37       5.988  13.201-134.589  1.00  0.00           O  
ATOM   1483  CB  ILE B  37       7.725  13.703-131.774  1.00  0.00           C  
ATOM   1484  CG1 ILE B  37       8.551  14.829-131.147  1.00  0.00           C  
ATOM   1485  CG2 ILE B  37       8.579  12.878-132.724  1.00  0.00           C  
ATOM   1486  CD1 ILE B  37       9.614  14.345-130.187  1.00  0.00           C  
ATOM   1487  N   LEU B  38       5.166  12.261-132.727  1.00  0.00           N  
ATOM   1488  CA  LEU B  38       4.641  11.115-133.463  1.00  0.00           C  
ATOM   1489  C   LEU B  38       3.550  11.559-134.410  1.00  0.00           C  
ATOM   1490  O   LEU B  38       3.314  10.933-135.442  1.00  0.00           O  
ATOM   1491  CB  LEU B  38       4.093  10.056-132.497  1.00  0.00           C  
ATOM   1492  CG  LEU B  38       5.139   9.328-131.644  1.00  0.00           C  
ATOM   1493  CD1 LEU B  38       4.441   8.342-130.717  1.00  0.00           C  
ATOM   1494  CD2 LEU B  38       6.131   8.618-132.552  1.00  0.00           C  
ATOM   1495  N   LEU B  39       2.890  12.654-134.058  1.00  0.00           N  
ATOM   1496  CA  LEU B  39       1.916  13.250-134.949  1.00  0.00           C  
ATOM   1497  C   LEU B  39       2.629  13.832-136.161  1.00  0.00           C  
ATOM   1498  O   LEU B  39       2.119  13.793-137.279  1.00  0.00           O  
ATOM   1499  CB  LEU B  39       1.120  14.343-134.225  1.00  0.00           C  
ATOM   1500  CG  LEU B  39       0.143  13.852-133.149  1.00  0.00           C  
ATOM   1501  CD1 LEU B  39      -0.363  15.040-132.342  1.00  0.00           C  
ATOM   1502  CD2 LEU B  39      -1.009  13.109-133.810  1.00  0.00           C  
ATOM   1503  N   ALA B  40       3.815  14.377-135.927  1.00  0.00           N  
ATOM   1504  CA  ALA B  40       4.588  14.981-136.992  1.00  0.00           C  
ATOM   1505  C   ALA B  40       5.137  13.863-137.865  1.00  0.00           C  
ATOM   1506  O   ALA B  40       5.284  14.017-139.079  1.00  0.00           O  
ATOM   1507  CB  ALA B  40       5.705  15.852-136.437  1.00  0.00           C  
ATOM   1508  N   GLU B  41       5.430  12.733-137.247  1.00  0.00           N  
ATOM   1509  CA  GLU B  41       5.958  11.587-137.976  1.00  0.00           C  
ATOM   1510  C   GLU B  41       4.920  11.155-139.010  1.00  0.00           C  
ATOM   1511  O   GLU B  41       3.723  11.122-138.713  1.00  0.00           O  
ATOM   1512  CB  GLU B  41       6.287  10.432-137.027  1.00  0.00           C  
ATOM   1513  CG  GLU B  41       7.409  10.728-136.042  1.00  0.00           C  
ATOM   1514  CD  GLU B  41       8.746  10.889-136.710  1.00  0.00           C  
ATOM   1515  OE1 GLU B  41       9.145  10.000-137.423  1.00  0.00           O  
ATOM   1516  OE2 GLU B  41       9.371  11.904-136.507  1.00  0.00           O1-
ATOM   1517  N   GLY B  42       5.366  10.816-140.216  1.00  0.00           N  
ATOM   1518  CA  GLY B  42       4.422  10.441-141.263  1.00  0.00           C  
ATOM   1519  C   GLY B  42       4.350  11.532-142.317  1.00  0.00           C  
ATOM   1520  O   GLY B  42       3.950  11.326-143.469  1.00  0.00           O  
ATOM   1521  N   GLN B  43       4.730  12.721-141.871  1.00  0.00           N  
ATOM   1522  CA  GLN B  43       4.739  13.893-142.703  1.00  0.00           C  
ATOM   1523  C   GLN B  43       6.075  13.812-143.408  1.00  0.00           C  
ATOM   1524  O   GLN B  43       6.305  14.431-144.432  1.00  0.00           O  
ATOM   1525  CB  GLN B  43       4.593  15.185-141.896  1.00  0.00           C  
ATOM   1526  CG  GLN B  43       3.286  15.296-141.130  1.00  0.00           C  
ATOM   1527  CD  GLN B  43       2.075  15.269-142.044  1.00  0.00           C  
ATOM   1528  NE2 GLN B  43       1.097  14.437-141.704  1.00  0.00           N  
ATOM   1529  OE1 GLN B  43       2.019  15.989-143.044  1.00  0.00           O  
ATOM   1530  N   LYS B  44       6.946  12.998-142.837  1.00  0.00           N  
ATOM   1531  CA  LYS B  44       8.253  12.769-143.397  1.00  0.00           C  
ATOM   1532  C   LYS B  44       7.967  12.176-144.758  1.00  0.00           C  
ATOM   1533  O   LYS B  44       8.542  12.590-145.756  1.00  0.00           O  
ATOM   1534  CB  LYS B  44       9.104  11.836-142.533  1.00  0.00           C  
ATOM   1535  CG  LYS B  44       9.601  12.459-141.235  1.00  0.00           C  
ATOM   1536  CD  LYS B  44      10.418  11.466-140.423  1.00  0.00           C  
ATOM   1537  CE  LYS B  44      11.053  12.131-139.210  1.00  0.00           C  
ATOM   1538  NZ  LYS B  44      11.661  11.137-138.285  1.00  0.00           N1+
ATOM   1539  N   SER B  45       7.038  11.229-144.782  1.00  0.00           N  
ATOM   1540  CA  SER B  45       6.671  10.511-145.996  1.00  0.00           C  
ATOM   1541  C   SER B  45       5.985  11.424-146.997  1.00  0.00           C  
ATOM   1542  O   SER B  45       6.351  11.462-148.169  1.00  0.00           O  
ATOM   1543  CB  SER B  45       5.760   9.347-145.657  1.00  0.00           C  
ATOM   1544  OG  SER B  45       5.386   8.650-146.813  1.00  0.00           O  
ATOM   1545  N   ALA B  46       4.982  12.152-146.535  1.00  0.00           N  
ATOM   1546  CA  ALA B  46       4.232  13.016-147.426  1.00  0.00           C  
ATOM   1547  C   ALA B  46       5.170  14.035-148.074  1.00  0.00           C  
ATOM   1548  O   ALA B  46       5.123  14.265-149.283  1.00  0.00           O  
ATOM   1549  CB  ALA B  46       3.107  13.711-146.673  1.00  0.00           C  
ATOM   1550  N   VAL B  47       6.027  14.632-147.262  1.00  0.00           N  
ATOM   1551  CA  VAL B  47       6.972  15.621-147.752  1.00  0.00           C  
ATOM   1552  C   VAL B  47       8.052  15.056-148.665  1.00  0.00           C  
ATOM   1553  O   VAL B  47       8.395  15.670-149.668  1.00  0.00           O  
ATOM   1554  CB  VAL B  47       7.652  16.316-146.557  1.00  0.00           C  
ATOM   1555  CG1 VAL B  47       8.810  17.180-147.032  1.00  0.00           C  
ATOM   1556  CG2 VAL B  47       6.633  17.150-145.796  1.00  0.00           C  
ATOM   1557  N   THR B  48       8.591  13.900-148.316  1.00  0.00           N  
ATOM   1558  CA  THR B  48       9.645  13.299-149.118  1.00  0.00           C  
ATOM   1559  C   THR B  48       9.113  12.958-150.502  1.00  0.00           C  
ATOM   1560  O   THR B  48       9.748  13.215-151.520  1.00  0.00           O  
ATOM   1561  CB  THR B  48      10.211  12.034-148.446  1.00  0.00           C  
ATOM   1562  CG2 THR B  48      11.303  11.416-149.307  1.00  0.00           C  
ATOM   1563  OG1 THR B  48      10.754  12.373-147.164  1.00  0.00           O  
ATOM   1564  N   GLU B  49       7.933  12.367-150.529  1.00  0.00           N  
ATOM   1565  CA  GLU B  49       7.342  12.011-151.791  1.00  0.00           C  
ATOM   1566  C   GLU B  49       7.155  13.266-152.640  1.00  0.00           C  
ATOM   1567  O   GLU B  49       7.572  13.296-153.800  1.00  0.00           O  
ATOM   1568  CB  GLU B  49       6.002  11.303-151.577  1.00  0.00           C  
ATOM   1569  CG  GLU B  49       5.309  10.866-152.859  1.00  0.00           C  
ATOM   1570  CD  GLU B  49       3.993  10.184-152.610  1.00  0.00           C  
ATOM   1571  OE1 GLU B  49       3.663   9.970-151.468  1.00  0.00           O  
ATOM   1572  OE2 GLU B  49       3.316   9.876-153.563  1.00  0.00           O1-
ATOM   1573  N   TYR B  50       6.568  14.315-152.062  1.00  0.00           N  
ATOM   1574  CA  TYR B  50       6.407  15.539-152.837  1.00  0.00           C  
ATOM   1575  C   TYR B  50       7.742  16.062-153.360  1.00  0.00           C  
ATOM   1576  O   TYR B  50       7.871  16.335-154.546  1.00  0.00           O  
ATOM   1577  CB  TYR B  50       5.716  16.612-151.992  1.00  0.00           C  
ATOM   1578  CG  TYR B  50       5.463  17.905-152.736  1.00  0.00           C  
ATOM   1579  CD1 TYR B  50       4.228  18.137-153.323  1.00  0.00           C  
ATOM   1580  CD2 TYR B  50       6.466  18.858-152.830  1.00  0.00           C  
ATOM   1581  CE1 TYR B  50       3.997  19.318-154.002  1.00  0.00           C  
ATOM   1582  CE2 TYR B  50       6.235  20.039-153.509  1.00  0.00           C  
ATOM   1583  CZ  TYR B  50       5.006  20.270-154.093  1.00  0.00           C  
ATOM   1584  OH  TYR B  50       4.776  21.446-154.770  1.00  0.00           O  
ATOM   1585  N   TYR B  51       8.732  16.188-152.481  1.00  0.00           N  
ATOM   1586  CA  TYR B  51      10.032  16.718-152.889  1.00  0.00           C  
ATOM   1587  C   TYR B  51      10.719  15.904-154.007  1.00  0.00           C  
ATOM   1588  O   TYR B  51      11.236  16.475-154.973  1.00  0.00           O  
ATOM   1589  CB  TYR B  51      10.951  16.803-151.669  1.00  0.00           C  
ATOM   1590  CG  TYR B  51      12.328  17.347-151.979  1.00  0.00           C  
ATOM   1591  CD1 TYR B  51      12.500  18.701-152.225  1.00  0.00           C  
ATOM   1592  CD2 TYR B  51      13.419  16.491-152.017  1.00  0.00           C  
ATOM   1593  CE1 TYR B  51      13.758  19.198-152.509  1.00  0.00           C  
ATOM   1594  CE2 TYR B  51      14.676  16.988-152.300  1.00  0.00           C  
ATOM   1595  CZ  TYR B  51      14.847  18.335-152.545  1.00  0.00           C  
ATOM   1596  OH  TYR B  51      16.100  18.829-152.827  1.00  0.00           O  
ATOM   1597  N   LEU B  52      10.744  14.581-153.863  1.00  0.00           N  
ATOM   1598  CA  LEU B  52      11.353  13.722-154.876  1.00  0.00           C  
ATOM   1599  C   LEU B  52      10.604  13.745-156.212  1.00  0.00           C  
ATOM   1600  O   LEU B  52      11.208  13.599-157.272  1.00  0.00           O  
ATOM   1601  CB  LEU B  52      11.421  12.281-154.357  1.00  0.00           C  
ATOM   1602  CG  LEU B  52      12.393  12.037-153.196  1.00  0.00           C  
ATOM   1603  CD1 LEU B  52      12.290  10.587-152.742  1.00  0.00           C  
ATOM   1604  CD2 LEU B  52      13.809  12.371-153.640  1.00  0.00           C  
ATOM   1605  N   ASN B  53       9.293  13.945-156.169  1.00  0.00           N  
ATOM   1606  CA  ASN B  53       8.532  13.996-157.412  1.00  0.00           C  
ATOM   1607  C   ASN B  53       8.515  15.389-158.040  1.00  0.00           C  
ATOM   1608  O   ASN B  53       8.277  15.516-159.235  1.00  0.00           O  
ATOM   1609  CB  ASN B  53       7.114  13.509-157.173  1.00  0.00           C  
ATOM   1610  CG  ASN B  53       7.049  12.032-156.899  1.00  0.00           C  
ATOM   1611  ND2 ASN B  53       6.031  11.614-156.191  1.00  0.00           N  
ATOM   1612  OD1 ASN B  53       7.922  11.269-157.328  1.00  0.00           O  
ATOM   1613  N   HIS B  54       8.775  16.429-157.253  1.00  0.00           N  
ATOM   1614  CA  HIS B  54       8.707  17.787-157.780  1.00  0.00           C  
ATOM   1615  C   HIS B  54       9.994  18.608-157.772  1.00  0.00           C  
ATOM   1616  O   HIS B  54      10.217  19.411-158.672  1.00  0.00           O  
ATOM   1617  CB  HIS B  54       7.638  18.565-157.007  1.00  0.00           C  
ATOM   1618  CG  HIS B  54       6.249  18.045-157.211  1.00  0.00           C  
ATOM   1619  CD2 HIS B  54       5.473  17.248-156.440  1.00  0.00           C  
ATOM   1620  ND1 HIS B  54       5.501  18.344-158.330  1.00  0.00           N  
ATOM   1621  CE1 HIS B  54       4.323  17.751-158.238  1.00  0.00           C  
ATOM   1622  NE2 HIS B  54       4.281  17.081-157.101  1.00  0.00           N  
ATOM   1623  N   GLY B  55      10.836  18.418-156.765  1.00  0.00           N  
ATOM   1624  CA  GLY B  55      12.087  19.151-156.735  1.00  0.00           C  
ATOM   1625  C   GLY B  55      12.056  20.320-155.770  1.00  0.00           C  
ATOM   1626  O   GLY B  55      13.092  20.900-155.475  1.00  0.00           O  
ATOM   1627  N   LYS B  56      10.862  20.679-155.307  1.00  0.00           N  
ATOM   1628  CA  LYS B  56      10.663  21.788-154.373  1.00  0.00           C  
ATOM   1629  C   LYS B  56       9.956  21.206-153.152  1.00  0.00           C  
ATOM   1630  O   LYS B  56       9.448  20.085-153.219  1.00  0.00           O  
ATOM   1631  CB  LYS B  56       9.847  22.921-154.999  1.00  0.00           C  
ATOM   1632  CG  LYS B  56      10.528  23.612-156.173  1.00  0.00           C  
ATOM   1633  CD  LYS B  56      11.749  24.398-155.718  1.00  0.00           C  
ATOM   1634  CE  LYS B  56      12.421  25.103-156.887  1.00  0.00           C  
ATOM   1635  NZ  LYS B  56      13.594  25.909-156.452  1.00  0.00           N1+
ATOM   1636  N   TRP B  57       9.945  21.939-152.038  1.00  0.00           N  
ATOM   1637  CA  TRP B  57       9.382  21.417-150.794  1.00  0.00           C  
ATOM   1638  C   TRP B  57       7.939  21.841-150.659  1.00  0.00           C  
ATOM   1639  O   TRP B  57       7.552  22.897-151.156  1.00  0.00           O  
ATOM   1640  CB  TRP B  57      10.178  21.910-149.584  1.00  0.00           C  
ATOM   1641  CG  TRP B  57      11.599  21.434-149.567  1.00  0.00           C  
ATOM   1642  CD1 TRP B  57      12.682  22.083-150.080  1.00  0.00           C  
ATOM   1643  CD2 TRP B  57      12.101  20.197-149.006  1.00  0.00           C  
ATOM   1644  CE2 TRP B  57      13.482  20.182-149.222  1.00  0.00           C  
ATOM   1645  CE3 TRP B  57      11.499  19.118-148.347  1.00  0.00           C  
ATOM   1646  NE1 TRP B  57      13.818  21.339-149.879  1.00  0.00           N  
ATOM   1647  CZ2 TRP B  57      14.278  19.128-148.805  1.00  0.00           C  
ATOM   1648  CZ3 TRP B  57      12.298  18.061-147.927  1.00  0.00           C  
ATOM   1649  CH2 TRP B  57      13.652  18.067-148.150  1.00  0.00           C  
ATOM   1650  N   PRO B  58       7.108  21.024-149.988  1.00  0.00           N  
ATOM   1651  CA  PRO B  58       5.697  21.395-149.809  1.00  0.00           C  
ATOM   1652  C   PRO B  58       5.562  22.746-149.117  1.00  0.00           C  
ATOM   1653  O   PRO B  58       6.114  22.952-148.038  1.00  0.00           O  
ATOM   1654  CB  PRO B  58       5.146  20.262-148.938  1.00  0.00           C  
ATOM   1655  CG  PRO B  58       6.030  19.102-149.246  1.00  0.00           C  
ATOM   1656  CD  PRO B  58       7.399  19.706-149.406  1.00  0.00           C  
ATOM   1657  N   GLU B  59       4.834  23.667-149.741  1.00  0.00           N  
ATOM   1658  CA  GLU B  59       4.574  24.970-149.127  1.00  0.00           C  
ATOM   1659  C   GLU B  59       3.538  24.957-148.020  1.00  0.00           C  
ATOM   1660  O   GLU B  59       3.595  25.787-147.119  1.00  0.00           O  
ATOM   1661  CB  GLU B  59       4.132  25.964-150.203  1.00  0.00           C  
ATOM   1662  CG  GLU B  59       5.218  26.332-151.204  1.00  0.00           C  
ATOM   1663  CD  GLU B  59       4.740  27.289-152.260  1.00  0.00           C  
ATOM   1664  OE1 GLU B  59       3.564  27.560-152.302  1.00  0.00           O  
ATOM   1665  OE2 GLU B  59       5.552  27.750-153.027  1.00  0.00           O1-
ATOM   1666  N   ASN B  60       2.595  24.028-148.101  1.00  0.00           N  
ATOM   1667  CA  ASN B  60       1.589  23.867-147.058  1.00  0.00           C  
ATOM   1668  C   ASN B  60       1.042  22.448-147.029  1.00  0.00           C  
ATOM   1669  O   ASN B  60       1.430  21.612-147.842  1.00  0.00           O  
ATOM   1670  CB  ASN B  60       0.463  24.868-147.245  1.00  0.00           C  
ATOM   1671  CG  ASN B  60      -0.216  24.730-148.580  1.00  0.00           C  
ATOM   1672  ND2 ASN B  60      -0.587  25.841-149.164  1.00  0.00           N  
ATOM   1673  OD1 ASN B  60      -0.406  23.616-149.081  1.00  0.00           O  
ATOM   1674  N   ASN B  61       0.139  22.174-146.093  1.00  0.00           N  
ATOM   1675  CA  ASN B  61      -0.451  20.846-145.968  1.00  0.00           C  
ATOM   1676  C   ASN B  61      -1.189  20.341-147.201  1.00  0.00           C  
ATOM   1677  O   ASN B  61      -1.147  19.141-147.519  1.00  0.00           O  
ATOM   1678  CB  ASN B  61      -1.385  20.822-144.772  1.00  0.00           C  
ATOM   1679  CG  ASN B  61      -0.651  20.921-143.464  1.00  0.00           C  
ATOM   1680  ND2 ASN B  61      -1.364  20.749-142.380  1.00  0.00           N  
ATOM   1681  OD1 ASN B  61       0.563  21.153-143.434  1.00  0.00           O  
ATOM   1682  N   THR B  62      -1.873  21.253-147.888  1.00  0.00           N  
ATOM   1683  CA  THR B  62      -2.586  20.911-149.108  1.00  0.00           C  
ATOM   1684  C   THR B  62      -1.621  20.462-150.185  1.00  0.00           C  
ATOM   1685  O   THR B  62      -1.902  19.536-150.933  1.00  0.00           O  
ATOM   1686  CB  THR B  62      -3.419  22.100-149.620  1.00  0.00           C  
ATOM   1687  CG2 THR B  62      -4.128  21.737-150.916  1.00  0.00           C  
ATOM   1688  OG1 THR B  62      -4.393  22.466-148.634  1.00  0.00           O  
ATOM   1689  N   SER B  63      -0.471  21.115-150.258  1.00  0.00           N  
ATOM   1690  CA  SER B  63       0.517  20.742-151.252  1.00  0.00           C  
ATOM   1691  C   SER B  63       1.144  19.424-150.851  1.00  0.00           C  
ATOM   1692  O   SER B  63       1.532  18.632-151.706  1.00  0.00           O  
ATOM   1693  CB  SER B  63       1.581  21.815-151.383  1.00  0.00           C  
ATOM   1694  OG  SER B  63       2.359  21.895-150.220  1.00  0.00           O  
ATOM   1695  N   ALA B  64       1.247  19.189-149.543  1.00  0.00           N  
ATOM   1696  CA  ALA B  64       1.777  17.925-149.041  1.00  0.00           C  
ATOM   1697  C   ALA B  64       0.833  16.770-149.348  1.00  0.00           C  
ATOM   1698  O   ALA B  64       1.265  15.654-149.640  1.00  0.00           O  
ATOM   1699  CB  ALA B  64       2.038  18.016-147.545  1.00  0.00           C  
ATOM   1700  N   GLY B  65      -0.457  17.050-149.294  1.00  0.00           N  
ATOM   1701  CA  GLY B  65      -1.434  16.025-149.601  1.00  0.00           C  
ATOM   1702  C   GLY B  65      -1.974  15.414-148.326  1.00  0.00           C  
ATOM   1703  O   GLY B  65      -2.368  14.242-148.305  1.00  0.00           O  
ATOM   1704  N   VAL B  66      -1.971  16.201-147.254  1.00  0.00           N  
ATOM   1705  CA  VAL B  66      -2.422  15.728-145.952  1.00  0.00           C  
ATOM   1706  C   VAL B  66      -3.505  16.672-145.487  1.00  0.00           C  
ATOM   1707  O   VAL B  66      -3.858  17.608-146.206  1.00  0.00           O  
ATOM   1708  CB  VAL B  66      -1.269  15.698-144.931  1.00  0.00           C  
ATOM   1709  CG1 VAL B  66      -0.166  14.762-145.401  1.00  0.00           C  
ATOM   1710  CG2 VAL B  66      -0.729  17.104-144.718  1.00  0.00           C  
ATOM   1711  N   ALA B  67      -4.030  16.426-144.291  1.00  0.00           N  
ATOM   1712  CA  ALA B  67      -5.082  17.260-143.727  1.00  0.00           C  
ATOM   1713  C   ALA B  67      -4.673  18.720-143.856  1.00  0.00           C  
ATOM   1714  O   ALA B  67      -3.701  19.170-143.250  1.00  0.00           O  
ATOM   1715  CB  ALA B  67      -5.352  16.892-142.275  1.00  0.00           C  
ATOM   1716  N   SER B  68      -5.418  19.447-144.677  1.00  0.00           N  
ATOM   1717  CA  SER B  68      -5.050  20.798-145.071  1.00  0.00           C  
ATOM   1718  C   SER B  68      -4.876  21.727-143.884  1.00  0.00           C  
ATOM   1719  O   SER B  68      -3.966  22.539-143.860  1.00  0.00           O  
ATOM   1720  CB  SER B  68      -6.102  21.365-146.004  1.00  0.00           C  
ATOM   1721  OG  SER B  68      -6.126  20.665-147.218  1.00  0.00           O  
ATOM   1722  N   SER B  69      -5.749  21.592-142.894  1.00  0.00           N  
ATOM   1723  CA  SER B  69      -5.681  22.429-141.703  1.00  0.00           C  
ATOM   1724  C   SER B  69      -4.728  21.838-140.654  1.00  0.00           C  
ATOM   1725  O   SER B  69      -4.829  20.661-140.311  1.00  0.00           O  
ATOM   1726  CB  SER B  69      -7.067  22.593-141.110  1.00  0.00           C  
ATOM   1727  OG  SER B  69      -7.033  23.410-139.972  1.00  0.00           O  
ATOM   1728  N   PRO B  70      -3.779  22.645-140.138  1.00  0.00           N  
ATOM   1729  CA  PRO B  70      -2.854  22.186-139.092  1.00  0.00           C  
ATOM   1730  C   PRO B  70      -3.603  21.628-137.893  1.00  0.00           C  
ATOM   1731  O   PRO B  70      -3.134  20.717-137.212  1.00  0.00           O  
ATOM   1732  CB  PRO B  70      -2.082  23.458-138.726  1.00  0.00           C  
ATOM   1733  CG  PRO B  70      -2.123  24.281-139.968  1.00  0.00           C  
ATOM   1734  CD  PRO B  70      -3.502  24.046-140.527  1.00  0.00           C  
ATOM   1735  N   THR B  71      -4.784  22.189-137.659  1.00  0.00           N  
ATOM   1736  CA  THR B  71      -5.629  21.829-136.527  1.00  0.00           C  
ATOM   1737  C   THR B  71      -6.222  20.434-136.655  1.00  0.00           C  
ATOM   1738  O   THR B  71      -6.740  19.881-135.692  1.00  0.00           O  
ATOM   1739  CB  THR B  71      -6.770  22.849-136.353  1.00  0.00           C  
ATOM   1740  CG2 THR B  71      -6.209  24.255-136.205  1.00  0.00           C  
ATOM   1741  OG1 THR B  71      -7.635  22.801-137.495  1.00  0.00           O  
ATOM   1742  N   ASP B  72      -6.161  19.860-137.840  1.00  0.00           N  
ATOM   1743  CA  ASP B  72      -6.666  18.512-138.014  1.00  0.00           C  
ATOM   1744  C   ASP B  72      -5.576  17.488-137.700  1.00  0.00           C  
ATOM   1745  O   ASP B  72      -5.817  16.279-137.751  1.00  0.00           O  
ATOM   1746  CB  ASP B  72      -7.179  18.310-139.442  1.00  0.00           C  
ATOM   1747  CG  ASP B  72      -8.420  19.138-139.748  1.00  0.00           C  
ATOM   1748  OD1 ASP B  72      -9.099  19.519-138.824  1.00  0.00           O  
ATOM   1749  OD2 ASP B  72      -8.677  19.382-140.903  1.00  0.00           O1-
ATOM   1750  N   ILE B  73      -4.383  17.978-137.369  1.00  0.00           N  
ATOM   1751  CA  ILE B  73      -3.283  17.117-136.940  1.00  0.00           C  
ATOM   1752  C   ILE B  73      -2.915  17.451-135.496  1.00  0.00           C  
ATOM   1753  O   ILE B  73      -1.852  18.006-135.208  1.00  0.00           O  
ATOM   1754  CB  ILE B  73      -2.051  17.282-137.848  1.00  0.00           C  
ATOM   1755  CG1 ILE B  73      -2.429  17.032-139.311  1.00  0.00           C  
ATOM   1756  CG2 ILE B  73      -0.939  16.339-137.414  1.00  0.00           C  
ATOM   1757  CD1 ILE B  73      -1.332  17.378-140.292  1.00  0.00           C  
ATOM   1758  N   LYS B  74      -3.816  17.095-134.588  1.00  0.00           N  
ATOM   1759  CA  LYS B  74      -3.666  17.438-133.186  1.00  0.00           C  
ATOM   1760  C   LYS B  74      -3.686  16.208-132.296  1.00  0.00           C  
ATOM   1761  O   LYS B  74      -4.027  15.106-132.732  1.00  0.00           O  
ATOM   1762  CB  LYS B  74      -4.767  18.410-132.759  1.00  0.00           C  
ATOM   1763  CG  LYS B  74      -6.177  17.840-132.844  1.00  0.00           C  
ATOM   1764  CD  LYS B  74      -7.216  18.873-132.433  1.00  0.00           C  
ATOM   1765  CE  LYS B  74      -8.620  18.288-132.461  1.00  0.00           C  
ATOM   1766  NZ  LYS B  74      -9.647  19.288-132.061  1.00  0.00           N1+
ATOM   1767  N   GLY B  75      -3.316  16.421-131.041  1.00  0.00           N  
ATOM   1768  CA  GLY B  75      -3.251  15.342-130.086  1.00  0.00           C  
ATOM   1769  C   GLY B  75      -4.024  15.681-128.828  1.00  0.00           C  
ATOM   1770  O   GLY B  75      -4.818  16.624-128.800  1.00  0.00           O  
ATOM   1771  N   LYS B  76      -3.785  14.906-127.781  1.00  0.00           N  
ATOM   1772  CA  LYS B  76      -4.391  15.126-126.475  1.00  0.00           C  
ATOM   1773  C   LYS B  76      -3.798  16.366-125.822  1.00  0.00           C  
ATOM   1774  O   LYS B  76      -4.497  17.141-125.171  1.00  0.00           O  
ATOM   1775  CB  LYS B  76      -4.196  13.905-125.574  1.00  0.00           C  
ATOM   1776  CG  LYS B  76      -4.945  13.975-124.250  1.00  0.00           C  
ATOM   1777  CD  LYS B  76      -4.847  12.661-123.490  1.00  0.00           C  
ATOM   1778  CE  LYS B  76      -5.831  12.617-122.330  1.00  0.00           C  
ATOM   1779  NZ  LYS B  76      -5.557  13.681-121.327  1.00  0.00           N1+
ATOM   1780  N   TYR B  77      -2.496  16.543-126.003  1.00  0.00           N  
ATOM   1781  CA  TYR B  77      -1.774  17.628-125.365  1.00  0.00           C  
ATOM   1782  C   TYR B  77      -1.149  18.492-126.443  1.00  0.00           C  
ATOM   1783  O   TYR B  77      -0.411  19.433-126.154  1.00  0.00           O  
ATOM   1784  CB  TYR B  77      -0.708  17.095-124.405  1.00  0.00           C  
ATOM   1785  CG  TYR B  77      -1.255  16.178-123.334  1.00  0.00           C  
ATOM   1786  CD1 TYR B  77      -1.037  14.811-123.414  1.00  0.00           C  
ATOM   1787  CD2 TYR B  77      -1.975  16.705-122.272  1.00  0.00           C  
ATOM   1788  CE1 TYR B  77      -1.537  13.973-122.436  1.00  0.00           C  
ATOM   1789  CE2 TYR B  77      -2.475  15.867-121.293  1.00  0.00           C  
ATOM   1790  CZ  TYR B  77      -2.257  14.506-121.373  1.00  0.00           C  
ATOM   1791  OH  TYR B  77      -2.755  13.672-120.399  1.00  0.00           O  
ATOM   1792  N   VAL B  78      -1.449  18.156-127.692  1.00  0.00           N  
ATOM   1793  CA  VAL B  78      -0.809  18.804-128.818  1.00  0.00           C  
ATOM   1794  C   VAL B  78      -1.783  19.673-129.575  1.00  0.00           C  
ATOM   1795  O   VAL B  78      -2.869  19.240-129.931  1.00  0.00           O  
ATOM   1796  CB  VAL B  78      -0.214  17.753-129.774  1.00  0.00           C  
ATOM   1797  CG1 VAL B  78       0.431  18.430-130.974  1.00  0.00           C  
ATOM   1798  CG2 VAL B  78       0.797  16.892-129.032  1.00  0.00           C  
ATOM   1799  N   LYS B  79      -1.376  20.912-129.813  1.00  0.00           N  
ATOM   1800  CA  LYS B  79      -2.238  21.883-130.467  1.00  0.00           C  
ATOM   1801  C   LYS B  79      -2.380  21.561-131.950  1.00  0.00           C  
ATOM   1802  O   LYS B  79      -3.488  21.310-132.429  1.00  0.00           O  
ATOM   1803  CB  LYS B  79      -1.692  23.300-130.281  1.00  0.00           C  
ATOM   1804  CG  LYS B  79      -2.559  24.394-130.889  1.00  0.00           C  
ATOM   1805  CD  LYS B  79      -1.967  25.772-130.637  1.00  0.00           C  
ATOM   1806  CE  LYS B  79      -2.803  26.862-131.292  1.00  0.00           C  
ATOM   1807  NZ  LYS B  79      -2.242  28.218-131.044  1.00  0.00           N1+
ATOM   1808  N   GLU B  80      -1.251  21.569-132.670  1.00  0.00           N  
ATOM   1809  CA  GLU B  80      -1.252  21.401-134.120  1.00  0.00           C  
ATOM   1810  C   GLU B  80       0.113  21.155-134.758  1.00  0.00           C  
ATOM   1811  O   GLU B  80       1.161  21.418-134.173  1.00  0.00           O  
ATOM   1812  CB  GLU B  80      -1.881  22.636-134.767  1.00  0.00           C  
ATOM   1813  CG  GLU B  80      -1.121  23.932-134.520  1.00  0.00           C  
ATOM   1814  CD  GLU B  80      -1.849  25.144-135.030  1.00  0.00           C  
ATOM   1815  OE1 GLU B  80      -2.899  24.985-135.606  1.00  0.00           O  
ATOM   1816  OE2 GLU B  80      -1.355  26.231-134.844  1.00  0.00           O1-
ATOM   1817  N   VAL B  81       0.067  20.637-135.978  1.00  0.00           N  
ATOM   1818  CA  VAL B  81       1.244  20.328-136.765  1.00  0.00           C  
ATOM   1819  C   VAL B  81       1.021  20.960-138.137  1.00  0.00           C  
ATOM   1820  O   VAL B  81      -0.010  20.742-138.781  1.00  0.00           O  
ATOM   1821  CB  VAL B  81       1.454  18.808-136.894  1.00  0.00           C  
ATOM   1822  CG1 VAL B  81       2.680  18.509-137.743  1.00  0.00           C  
ATOM   1823  CG2 VAL B  81       1.590  18.186-135.512  1.00  0.00           C  
ATOM   1824  N   GLU B  82       1.994  21.753-138.567  1.00  0.00           N  
ATOM   1825  CA  GLU B  82       1.935  22.430-139.849  1.00  0.00           C  
ATOM   1826  C   GLU B  82       3.153  22.130-140.707  1.00  0.00           C  
ATOM   1827  O   GLU B  82       4.293  22.226-140.263  1.00  0.00           O  
ATOM   1828  CB  GLU B  82       1.810  23.941-139.641  1.00  0.00           C  
ATOM   1829  CG  GLU B  82       1.715  24.747-140.928  1.00  0.00           C  
ATOM   1830  CD  GLU B  82       1.557  26.222-140.685  1.00  0.00           C  
ATOM   1831  OE1 GLU B  82       1.505  26.615-139.544  1.00  0.00           O  
ATOM   1832  OE2 GLU B  82       1.488  26.958-141.641  1.00  0.00           O1-
ATOM   1833  N   VAL B  83       2.888  21.737-141.946  1.00  0.00           N  
ATOM   1834  CA  VAL B  83       3.932  21.490-142.920  1.00  0.00           C  
ATOM   1835  C   VAL B  83       4.041  22.782-143.687  1.00  0.00           C  
ATOM   1836  O   VAL B  83       3.044  23.294-144.210  1.00  0.00           O  
ATOM   1837  CB  VAL B  83       3.587  20.319-143.859  1.00  0.00           C  
ATOM   1838  CG1 VAL B  83       4.702  20.102-144.871  1.00  0.00           C  
ATOM   1839  CG2 VAL B  83       3.343  19.057-143.046  1.00  0.00           C  
ATOM   1840  N   LYS B  84       5.245  23.324-143.743  1.00  0.00           N  
ATOM   1841  CA  LYS B  84       5.483  24.561-144.464  1.00  0.00           C  
ATOM   1842  C   LYS B  84       6.927  24.565-144.945  1.00  0.00           C  
ATOM   1843  O   LYS B  84       7.860  24.543-144.132  1.00  0.00           O  
ATOM   1844  CB  LYS B  84       5.198  25.779-143.584  1.00  0.00           C  
ATOM   1845  CG  LYS B  84       5.339  27.118-144.297  1.00  0.00           C  
ATOM   1846  CD  LYS B  84       4.939  28.272-143.390  1.00  0.00           C  
ATOM   1847  CE  LYS B  84       5.081  29.610-144.100  1.00  0.00           C  
ATOM   1848  NZ  LYS B  84       4.687  30.748-143.226  1.00  0.00           N1+
ATOM   1849  N   ASN B  85       7.088  24.588-146.269  1.00  0.00           N  
ATOM   1850  CA  ASN B  85       8.391  24.624-146.930  1.00  0.00           C  
ATOM   1851  C   ASN B  85       9.257  23.428-146.547  1.00  0.00           C  
ATOM   1852  O   ASN B  85      10.460  23.561-146.340  1.00  0.00           O  
ATOM   1853  CB  ASN B  85       9.111  25.922-146.611  1.00  0.00           C  
ATOM   1854  CG  ASN B  85       8.379  27.130-147.125  1.00  0.00           C  
ATOM   1855  ND2 ASN B  85       8.418  28.200-146.373  1.00  0.00           N  
ATOM   1856  OD1 ASN B  85       7.778  27.094-148.206  1.00  0.00           O  
ATOM   1857  N   GLY B  86       8.620  22.262-146.453  1.00  0.00           N  
ATOM   1858  CA  GLY B  86       9.330  21.043-146.099  1.00  0.00           C  
ATOM   1859  C   GLY B  86       9.657  20.908-144.622  1.00  0.00           C  
ATOM   1860  O   GLY B  86      10.302  19.943-144.219  1.00  0.00           O  
ATOM   1861  N   VAL B  87       9.230  21.879-143.818  1.00  0.00           N  
ATOM   1862  CA  VAL B  87       9.486  21.859-142.381  1.00  0.00           C  
ATOM   1863  C   VAL B  87       8.189  21.472-141.693  1.00  0.00           C  
ATOM   1864  O   VAL B  87       7.138  22.028-142.000  1.00  0.00           O  
ATOM   1865  CB  VAL B  87       9.967  23.232-141.875  1.00  0.00           C  
ATOM   1866  CG1 VAL B  87      10.163  23.206-140.367  1.00  0.00           C  
ATOM   1867  CG2 VAL B  87      11.257  23.621-142.580  1.00  0.00           C  
ATOM   1868  N   VAL B  88       8.255  20.517-140.775  1.00  0.00           N  
ATOM   1869  CA  VAL B  88       7.057  20.057-140.115  1.00  0.00           C  
ATOM   1870  C   VAL B  88       7.126  20.461-138.649  1.00  0.00           C  
ATOM   1871  O   VAL B  88       7.849  19.855-137.859  1.00  0.00           O  
ATOM   1872  CB  VAL B  88       6.915  18.528-140.239  1.00  0.00           C  
ATOM   1873  CG1 VAL B  88       5.613  18.061-139.607  1.00  0.00           C  
ATOM   1874  CG2 VAL B  88       6.981  18.119-141.703  1.00  0.00           C  
ATOM   1875  N   THR B  89       6.391  21.513-138.303  1.00  0.00           N  
ATOM   1876  CA  THR B  89       6.482  22.136-136.988  1.00  0.00           C  
ATOM   1877  C   THR B  89       5.288  21.775-136.115  1.00  0.00           C  
ATOM   1878  O   THR B  89       4.146  21.862-136.552  1.00  0.00           O  
ATOM   1879  CB  THR B  89       6.588  23.667-137.108  1.00  0.00           C  
ATOM   1880  CG2 THR B  89       6.612  24.310-135.730  1.00  0.00           C  
ATOM   1881  OG1 THR B  89       7.787  24.012-137.814  1.00  0.00           O  
ATOM   1882  N   ALA B  90       5.543  21.368-134.876  1.00  0.00           N  
ATOM   1883  CA  ALA B  90       4.450  20.975-133.988  1.00  0.00           C  
ATOM   1884  C   ALA B  90       4.394  21.899-132.788  1.00  0.00           C  
ATOM   1885  O   ALA B  90       5.433  22.282-132.266  1.00  0.00           O  
ATOM   1886  CB  ALA B  90       4.609  19.528-133.542  1.00  0.00           C  
ATOM   1887  N   THR B  91       3.185  22.257-132.357  1.00  0.00           N  
ATOM   1888  CA  THR B  91       3.027  23.152-131.216  1.00  0.00           C  
ATOM   1889  C   THR B  91       2.168  22.537-130.122  1.00  0.00           C  
ATOM   1890  O   THR B  91       1.139  21.902-130.382  1.00  0.00           O  
ATOM   1891  CB  THR B  91       2.412  24.495-131.652  1.00  0.00           C  
ATOM   1892  CG2 THR B  91       2.240  25.417-130.455  1.00  0.00           C  
ATOM   1893  OG1 THR B  91       3.266  25.124-132.617  1.00  0.00           O  
ATOM   1894  N   MET B  92       2.623  22.722-128.886  1.00  0.00           N  
ATOM   1895  CA  MET B  92       1.964  22.138-127.730  1.00  0.00           C  
ATOM   1896  C   MET B  92       0.819  23.047-127.298  1.00  0.00           C  
ATOM   1897  O   MET B  92       0.814  24.239-127.596  1.00  0.00           O  
ATOM   1898  CB  MET B  92       2.958  21.927-126.590  1.00  0.00           C  
ATOM   1899  CG  MET B  92       4.090  20.961-126.912  1.00  0.00           C  
ATOM   1900  SD  MET B  92       3.498  19.303-127.303  1.00  0.00           S  
ATOM   1901  CE  MET B  92       2.808  18.810-125.726  1.00  0.00           C  
ATOM   1902  N   LEU B  93      -0.152  22.471-126.602  1.00  0.00           N  
ATOM   1903  CA  LEU B  93      -1.208  23.242-125.961  1.00  0.00           C  
ATOM   1904  C   LEU B  93      -0.658  23.891-124.688  1.00  0.00           C  
ATOM   1905  O   LEU B  93       0.527  23.760-124.366  1.00  0.00           O  
ATOM   1906  CB  LEU B  93      -2.406  22.344-125.628  1.00  0.00           C  
ATOM   1907  CG  LEU B  93      -3.180  21.793-126.832  1.00  0.00           C  
ATOM   1908  CD1 LEU B  93      -4.170  20.737-126.360  1.00  0.00           C  
ATOM   1909  CD2 LEU B  93      -3.894  22.934-127.542  1.00  0.00           C  
ATOM   1910  N   SER B  94      -1.520  24.601-123.968  1.00  0.00           N  
ATOM   1911  CA  SER B  94      -1.156  25.115-122.658  1.00  0.00           C  
ATOM   1912  C   SER B  94      -2.141  24.576-121.635  1.00  0.00           C  
ATOM   1913  O   SER B  94      -1.953  24.745-120.433  1.00  0.00           O  
ATOM   1914  CB  SER B  94      -1.163  26.632-122.652  1.00  0.00           C  
ATOM   1915  OG  SER B  94      -2.450  27.129-122.893  1.00  0.00           O  
ATOM   1916  N   SER B  95      -3.187  23.921-122.127  1.00  0.00           N  
ATOM   1917  CA  SER B  95      -4.199  23.310-121.267  1.00  0.00           C  
ATOM   1918  C   SER B  95      -3.958  21.811-121.102  1.00  0.00           C  
ATOM   1919  O   SER B  95      -4.158  21.030-122.037  1.00  0.00           O  
ATOM   1920  CB  SER B  95      -5.582  23.548-121.841  1.00  0.00           C  
ATOM   1921  OG  SER B  95      -6.561  22.897-121.079  1.00  0.00           O  
ATOM   1922  N   GLY B  96      -3.528  21.419-119.906  1.00  0.00           N  
ATOM   1923  CA  GLY B  96      -3.107  20.051-119.673  1.00  0.00           C  
ATOM   1924  C   GLY B  96      -1.629  19.797-119.899  1.00  0.00           C  
ATOM   1925  O   GLY B  96      -1.106  18.756-119.495  1.00  0.00           O  
ATOM   1926  N   VAL B  97      -0.943  20.745-120.536  1.00  0.00           N  
ATOM   1927  CA  VAL B  97       0.496  20.613-120.759  1.00  0.00           C  
ATOM   1928  C   VAL B  97       1.371  21.142-119.609  1.00  0.00           C  
ATOM   1929  O   VAL B  97       1.085  22.185-119.023  1.00  0.00           O  
ATOM   1930  CB  VAL B  97       0.879  21.357-122.052  1.00  0.00           C  
ATOM   1931  CG1 VAL B  97       2.387  21.335-122.253  1.00  0.00           C  
ATOM   1932  CG2 VAL B  97       0.167  20.729-123.241  1.00  0.00           C  
ATOM   1933  N   ASN B  98       2.432  20.408-119.295  1.00  0.00           N  
ATOM   1934  CA  ASN B  98       3.226  20.642-118.098  1.00  0.00           C  
ATOM   1935  C   ASN B  98       3.286  22.115-117.729  1.00  0.00           C  
ATOM   1936  O   ASN B  98       2.456  22.610-116.966  1.00  0.00           O  
ATOM   1937  CB  ASN B  98       4.627  20.086-118.276  1.00  0.00           C  
ATOM   1938  CG  ASN B  98       5.493  20.302-117.067  1.00  0.00           C  
ATOM   1939  ND2 ASN B  98       5.385  19.420-116.106  1.00  0.00           N  
ATOM   1940  OD1 ASN B  98       6.261  21.269-117.002  1.00  0.00           O  
ATOM   1941  N   ASN B  99       4.271  22.814-118.273  1.00  0.00           N  
ATOM   1942  CA  ASN B  99       4.449  24.228-117.989  1.00  0.00           C  
ATOM   1943  C   ASN B  99       5.755  24.670-118.632  1.00  0.00           C  
ATOM   1944  O   ASN B  99       5.870  25.781-119.147  1.00  0.00           O  
ATOM   1945  CB  ASN B  99       4.442  24.502-116.496  1.00  0.00           C  
ATOM   1946  CG  ASN B  99       4.569  25.966-116.177  1.00  0.00           C  
ATOM   1947  ND2 ASN B  99       4.786  26.273-114.924  1.00  0.00           N  
ATOM   1948  OD1 ASN B  99       4.470  26.819-117.067  1.00  0.00           O  
ATOM   1949  N   GLU B 100       6.747  23.792-118.599  1.00  0.00           N  
ATOM   1950  CA  GLU B 100       8.032  24.129-119.181  1.00  0.00           C  
ATOM   1951  C   GLU B 100       8.011  23.879-120.672  1.00  0.00           C  
ATOM   1952  O   GLU B 100       8.895  24.324-121.394  1.00  0.00           O  
ATOM   1953  CB  GLU B 100       9.152  23.316-118.528  1.00  0.00           C  
ATOM   1954  CG  GLU B 100       9.393  23.644-117.061  1.00  0.00           C  
ATOM   1955  CD  GLU B 100      10.556  22.891-116.477  1.00  0.00           C  
ATOM   1956  OE1 GLU B 100      11.125  22.083-117.171  1.00  0.00           O  
ATOM   1957  OE2 GLU B 100      10.876  23.124-115.335  1.00  0.00           O1-
ATOM   1958  N   ILE B 101       6.992  23.165-121.138  1.00  0.00           N  
ATOM   1959  CA  ILE B 101       6.804  22.989-122.573  1.00  0.00           C  
ATOM   1960  C   ILE B 101       5.470  23.529-123.103  1.00  0.00           C  
ATOM   1961  O   ILE B 101       5.100  23.248-124.243  1.00  0.00           O  
ATOM   1962  CB  ILE B 101       6.920  21.498-122.937  1.00  0.00           C  
ATOM   1963  CG1 ILE B 101       5.861  20.683-122.190  1.00  0.00           C  
ATOM   1964  CG2 ILE B 101       8.315  20.980-122.623  1.00  0.00           C  
ATOM   1965  CD1 ILE B 101       5.724  19.261-122.685  1.00  0.00           C  
ATOM   1966  N   LYS B 102       4.754  24.307-122.298  1.00  0.00           N  
ATOM   1967  CA  LYS B 102       3.439  24.780-122.710  1.00  0.00           C  
ATOM   1968  C   LYS B 102       3.525  25.810-123.826  1.00  0.00           C  
ATOM   1969  O   LYS B 102       4.156  26.863-123.678  1.00  0.00           O  
ATOM   1970  CB  LYS B 102       2.689  25.371-121.515  1.00  0.00           C  
ATOM   1971  CG  LYS B 102       3.203  26.730-121.060  1.00  0.00           C  
ATOM   1972  CD  LYS B 102       2.433  27.234-119.848  1.00  0.00           C  
ATOM   1973  CE  LYS B 102       2.869  28.639-119.460  1.00  0.00           C  
ATOM   1974  NZ  LYS B 102       4.299  28.686-119.053  1.00  0.00           N1+
ATOM   1975  N   GLY B 103       2.873  25.496-124.941  1.00  0.00           N  
ATOM   1976  CA  GLY B 103       2.807  26.437-126.037  1.00  0.00           C  
ATOM   1977  C   GLY B 103       4.174  26.499-126.688  1.00  0.00           C  
ATOM   1978  O   GLY B 103       4.505  27.467-127.371  1.00  0.00           O  
ATOM   1979  N   LYS B 104       4.984  25.466-126.476  1.00  0.00           N  
ATOM   1980  CA  LYS B 104       6.318  25.446-127.062  1.00  0.00           C  
ATOM   1981  C   LYS B 104       6.365  24.439-128.195  1.00  0.00           C  
ATOM   1982  O   LYS B 104       5.434  23.654-128.374  1.00  0.00           O  
ATOM   1983  CB  LYS B 104       7.375  25.113-126.008  1.00  0.00           C  
ATOM   1984  CG  LYS B 104       7.572  26.191-124.951  1.00  0.00           C  
ATOM   1985  CD  LYS B 104       8.833  25.944-124.137  1.00  0.00           C  
ATOM   1986  CE  LYS B 104       9.026  27.016-123.075  1.00  0.00           C  
ATOM   1987  NZ  LYS B 104      10.146  26.689-122.151  1.00  0.00           N1+
ATOM   1988  N   LYS B 105       7.444  24.465-128.970  1.00  0.00           N  
ATOM   1989  CA  LYS B 105       7.425  23.760-130.243  1.00  0.00           C  
ATOM   1990  C   LYS B 105       8.714  23.090-130.732  1.00  0.00           C  
ATOM   1991  O   LYS B 105       9.785  23.262-130.154  1.00  0.00           O  
ATOM   1992  CB  LYS B 105       6.949  24.736-131.320  1.00  0.00           C  
ATOM   1993  CG  LYS B 105       7.732  26.041-131.376  1.00  0.00           C  
ATOM   1994  CD  LYS B 105       7.159  26.985-132.423  1.00  0.00           C  
ATOM   1995  CE  LYS B 105       7.929  28.296-132.468  1.00  0.00           C  
ATOM   1996  NZ  LYS B 105       7.340  29.255-133.442  1.00  0.00           N1+
ATOM   1997  N   LEU B 106       8.563  22.305-131.800  1.00  0.00           N  
ATOM   1998  CA  LEU B 106       9.652  21.569-132.424  1.00  0.00           C  
ATOM   1999  C   LEU B 106       9.418  21.473-133.941  1.00  0.00           C  
ATOM   2000  O   LEU B 106       8.311  21.737-134.424  1.00  0.00           O  
ATOM   2001  CB  LEU B 106       9.766  20.166-131.814  1.00  0.00           C  
ATOM   2002  CG  LEU B 106       8.508  19.294-131.913  1.00  0.00           C  
ATOM   2003  CD1 LEU B 106       8.484  18.588-133.262  1.00  0.00           C  
ATOM   2004  CD2 LEU B 106       8.496  18.289-130.770  1.00  0.00           C  
ATOM   2005  N   SER B 107      10.455  21.110-134.695  1.00  0.00           N  
ATOM   2006  CA  SER B 107      10.301  20.902-136.125  1.00  0.00           C  
ATOM   2007  C   SER B 107      10.973  19.643-136.608  1.00  0.00           C  
ATOM   2008  O   SER B 107      11.825  19.071-135.942  1.00  0.00           O  
ATOM   2009  CB  SER B 107      10.860  22.090-136.882  1.00  0.00           C  
ATOM   2010  OG  SER B 107      10.225  23.277-136.493  1.00  0.00           O  
ATOM   2011  N   LEU B 108      10.573  19.234-137.800  1.00  0.00           N  
ATOM   2012  CA  LEU B 108      11.231  18.191-138.552  1.00  0.00           C  
ATOM   2013  C   LEU B 108      11.756  18.971-139.728  1.00  0.00           C  
ATOM   2014  O   LEU B 108      11.140  19.949-140.139  1.00  0.00           O  
ATOM   2015  CB  LEU B 108      10.279  17.068-138.981  1.00  0.00           C  
ATOM   2016  CG  LEU B 108       9.523  16.367-137.845  1.00  0.00           C  
ATOM   2017  CD1 LEU B 108       8.586  15.318-138.429  1.00  0.00           C  
ATOM   2018  CD2 LEU B 108      10.520  15.736-136.885  1.00  0.00           C  
ATOM   2019  N   TRP B 109      12.909  18.577-140.249  1.00  0.00           N  
ATOM   2020  CA  TRP B 109      13.424  19.212-141.441  1.00  0.00           C  
ATOM   2021  C   TRP B 109      14.323  18.213-142.080  1.00  0.00           C  
ATOM   2022  O   TRP B 109      14.639  17.191-141.485  1.00  0.00           O  
ATOM   2023  CB  TRP B 109      14.187  20.500-141.124  1.00  0.00           C  
ATOM   2024  CG  TRP B 109      15.384  20.286-140.248  1.00  0.00           C  
ATOM   2025  CD1 TRP B 109      16.671  20.102-140.656  1.00  0.00           C  
ATOM   2026  CD2 TRP B 109      15.411  20.232-138.801  1.00  0.00           C  
ATOM   2027  CE2 TRP B 109      16.740  20.016-138.426  1.00  0.00           C  
ATOM   2028  CE3 TRP B 109      14.429  20.350-137.809  1.00  0.00           C  
ATOM   2029  NE1 TRP B 109      17.493  19.937-139.570  1.00  0.00           N  
ATOM   2030  CZ2 TRP B 109      17.119  19.911-137.097  1.00  0.00           C  
ATOM   2031  CZ3 TRP B 109      14.810  20.246-136.476  1.00  0.00           C  
ATOM   2032  CH2 TRP B 109      16.121  20.033-136.130  1.00  0.00           C  
ATOM   2033  N   ALA B 110      14.739  18.483-143.300  1.00  0.00           N  
ATOM   2034  CA  ALA B 110      15.531  17.506-144.004  1.00  0.00           C  
ATOM   2035  C   ALA B 110      16.515  18.155-144.939  1.00  0.00           C  
ATOM   2036  O   ALA B 110      16.285  19.246-145.467  1.00  0.00           O  
ATOM   2037  CB  ALA B 110      14.628  16.548-144.766  1.00  0.00           C  
ATOM   2038  N   ARG B 111      17.617  17.457-145.165  1.00  0.00           N  
ATOM   2039  CA  ARG B 111      18.606  17.908-146.113  1.00  0.00           C  
ATOM   2040  C   ARG B 111      18.607  16.985-147.310  1.00  0.00           C  
ATOM   2041  O   ARG B 111      18.240  15.821-147.210  1.00  0.00           O  
ATOM   2042  CB  ARG B 111      19.990  17.942-145.484  1.00  0.00           C  
ATOM   2043  CG  ARG B 111      20.135  18.895-144.308  1.00  0.00           C  
ATOM   2044  CD  ARG B 111      20.049  20.314-144.738  1.00  0.00           C  
ATOM   2045  NE  ARG B 111      21.029  20.631-145.764  1.00  0.00           N  
ATOM   2046  CZ  ARG B 111      22.308  20.979-145.519  1.00  0.00           C  
ATOM   2047  NH1 ARG B 111      22.744  21.051-144.281  1.00  0.00           N1+
ATOM   2048  NH2 ARG B 111      23.123  21.249-146.523  1.00  0.00           N  
ATOM   2049  N   ARG B 112      19.010  17.526-148.448  1.00  0.00           N  
ATOM   2050  CA  ARG B 112      19.026  16.770-149.690  1.00  0.00           C  
ATOM   2051  C   ARG B 112      20.208  15.811-149.690  1.00  0.00           C  
ATOM   2052  O   ARG B 112      21.355  16.228-149.558  1.00  0.00           O  
ATOM   2053  CB  ARG B 112      19.116  17.699-150.892  1.00  0.00           C  
ATOM   2054  CG  ARG B 112      19.054  17.004-152.243  1.00  0.00           C  
ATOM   2055  CD  ARG B 112      19.279  17.955-153.361  1.00  0.00           C  
ATOM   2056  NE  ARG B 112      19.335  17.278-154.646  1.00  0.00           N  
ATOM   2057  CZ  ARG B 112      18.278  17.093-155.461  1.00  0.00           C  
ATOM   2058  NH1 ARG B 112      17.092  17.539-155.110  1.00  0.00           N1+
ATOM   2059  NH2 ARG B 112      18.433  16.463-156.612  1.00  0.00           N  
ATOM   2060  N   GLU B 113      19.932  14.521-149.812  1.00  0.00           N  
ATOM   2061  CA  GLU B 113      21.015  13.563-149.947  1.00  0.00           C  
ATOM   2062  C   GLU B 113      21.283  13.417-151.430  1.00  0.00           C  
ATOM   2063  O   GLU B 113      22.381  13.044-151.844  1.00  0.00           O  
ATOM   2064  CB  GLU B 113      20.658  12.214-149.319  1.00  0.00           C  
ATOM   2065  CG  GLU B 113      20.508  12.245-147.805  1.00  0.00           C  
ATOM   2066  CD  GLU B 113      20.161  10.903-147.224  1.00  0.00           C  
ATOM   2067  OE1 GLU B 113      19.321  10.236-147.778  1.00  0.00           O  
ATOM   2068  OE2 GLU B 113      20.736  10.544-146.223  1.00  0.00           O1-
ATOM   2069  N   ASN B 114      20.260  13.740-152.217  1.00  0.00           N  
ATOM   2070  CA  ASN B 114      20.333  13.746-153.671  1.00  0.00           C  
ATOM   2071  C   ASN B 114      19.813  12.392-154.128  1.00  0.00           C  
ATOM   2072  O   ASN B 114      20.554  11.408-154.174  1.00  0.00           O  
ATOM   2073  CB  ASN B 114      21.742  14.007-154.169  1.00  0.00           C  
ATOM   2074  CG  ASN B 114      21.779  14.396-155.621  1.00  0.00           C  
ATOM   2075  ND2 ASN B 114      22.691  13.816-156.359  1.00  0.00           N  
ATOM   2076  OD1 ASN B 114      20.980  15.224-156.075  1.00  0.00           O  
ATOM   2077  N   GLY B 115      18.525  12.349-154.446  1.00  0.00           N  
ATOM   2078  CA  GLY B 115      17.874  11.080-154.735  1.00  0.00           C  
ATOM   2079  C   GLY B 115      17.045  10.662-153.531  1.00  0.00           C  
ATOM   2080  O   GLY B 115      16.200   9.767-153.606  1.00  0.00           O  
ATOM   2081  N   SER B 116      17.308  11.317-152.407  1.00  0.00           N  
ATOM   2082  CA  SER B 116      16.616  11.057-151.151  1.00  0.00           C  
ATOM   2083  C   SER B 116      16.911  12.234-150.219  1.00  0.00           C  
ATOM   2084  O   SER B 116      17.673  13.136-150.571  1.00  0.00           O  
ATOM   2085  CB  SER B 116      17.074   9.749-150.535  1.00  0.00           C  
ATOM   2086  OG  SER B 116      18.424   9.815-150.164  1.00  0.00           O  
ATOM   2087  N   VAL B 117      16.296  12.229-149.041  1.00  0.00           N  
ATOM   2088  CA  VAL B 117      16.527  13.294-148.079  1.00  0.00           C  
ATOM   2089  C   VAL B 117      16.834  12.704-146.707  1.00  0.00           C  
ATOM   2090  O   VAL B 117      16.425  11.592-146.401  1.00  0.00           O  
ATOM   2091  CB  VAL B 117      15.294  14.212-147.986  1.00  0.00           C  
ATOM   2092  CG1 VAL B 117      15.015  14.868-149.330  1.00  0.00           C  
ATOM   2093  CG2 VAL B 117      14.088  13.414-147.514  1.00  0.00           C  
ATOM   2094  N   LYS B 118      17.581  13.449-145.899  1.00  0.00           N  
ATOM   2095  CA  LYS B 118      17.948  12.999-144.573  1.00  0.00           C  
ATOM   2096  C   LYS B 118      17.127  13.797-143.555  1.00  0.00           C  
ATOM   2097  O   LYS B 118      17.279  15.020-143.443  1.00  0.00           O  
ATOM   2098  CB  LYS B 118      19.448  13.171-144.328  1.00  0.00           C  
ATOM   2099  CG  LYS B 118      19.931  12.644-142.983  1.00  0.00           C  
ATOM   2100  CD  LYS B 118      21.442  12.759-142.854  1.00  0.00           C  
ATOM   2101  CE  LYS B 118      21.922  12.274-141.494  1.00  0.00           C  
ATOM   2102  NZ  LYS B 118      23.398  12.395-141.348  1.00  0.00           N1+
ATOM   2103  N   TRP B 119      16.260  13.113-142.816  1.00  0.00           N  
ATOM   2104  CA  TRP B 119      15.412  13.791-141.846  1.00  0.00           C  
ATOM   2105  C   TRP B 119      15.990  13.968-140.445  1.00  0.00           C  
ATOM   2106  O   TRP B 119      16.649  13.079-139.897  1.00  0.00           O  
ATOM   2107  CB  TRP B 119      14.089  13.032-141.729  1.00  0.00           C  
ATOM   2108  CG  TRP B 119      13.145  13.297-142.862  1.00  0.00           C  
ATOM   2109  CD1 TRP B 119      12.981  12.537-143.982  1.00  0.00           C  
ATOM   2110  CD2 TRP B 119      12.223  14.407-142.992  1.00  0.00           C  
ATOM   2111  CE2 TRP B 119      11.551  14.239-144.206  1.00  0.00           C  
ATOM   2112  CE3 TRP B 119      11.919  15.511-142.187  1.00  0.00           C  
ATOM   2113  NE1 TRP B 119      12.027  13.095-144.797  1.00  0.00           N  
ATOM   2114  CZ2 TRP B 119      10.590  15.136-144.642  1.00  0.00           C  
ATOM   2115  CZ3 TRP B 119      10.954  16.411-142.624  1.00  0.00           C  
ATOM   2116  CH2 TRP B 119      10.306  16.227-143.820  1.00  0.00           C  
ATOM   2117  N   PHE B 120      15.704  15.121-139.865  1.00  0.00           N  
ATOM   2118  CA  PHE B 120      16.215  15.468-138.553  1.00  0.00           C  
ATOM   2119  C   PHE B 120      15.027  15.859-137.704  1.00  0.00           C  
ATOM   2120  O   PHE B 120      14.018  16.322-138.223  1.00  0.00           O  
ATOM   2121  CB  PHE B 120      17.226  16.614-138.628  1.00  0.00           C  
ATOM   2122  CG  PHE B 120      18.408  16.324-139.509  1.00  0.00           C  
ATOM   2123  CD1 PHE B 120      18.401  16.694-140.845  1.00  0.00           C  
ATOM   2124  CD2 PHE B 120      19.527  15.681-139.004  1.00  0.00           C  
ATOM   2125  CE1 PHE B 120      19.488  16.428-141.657  1.00  0.00           C  
ATOM   2126  CE2 PHE B 120      20.615  15.414-139.812  1.00  0.00           C  
ATOM   2127  CZ  PHE B 120      20.594  15.788-141.141  1.00  0.00           C  
ATOM   2128  N   CYS B 121      15.156  15.663-136.397  1.00  0.00           N  
ATOM   2129  CA  CYS B 121      14.080  15.961-135.460  1.00  0.00           C  
ATOM   2130  C   CYS B 121      14.688  16.733-134.299  1.00  0.00           C  
ATOM   2131  O   CYS B 121      15.594  16.241-133.625  1.00  0.00           O  
ATOM   2132  CB  CYS B 121      13.406  14.687-134.950  1.00  0.00           C  
ATOM   2133  SG  CYS B 121      12.029  14.983-133.816  1.00  0.00           S  
ATOM   2134  N   GLY B 122      14.203  17.944-134.065  1.00  0.00           N  
ATOM   2135  CA  GLY B 122      14.790  18.757-133.019  1.00  0.00           C  
ATOM   2136  C   GLY B 122      14.055  20.057-132.769  1.00  0.00           C  
ATOM   2137  O   GLY B 122      12.856  20.141-132.962  1.00  0.00           O  
ATOM   2138  N   GLN B 123      14.789  21.068-132.324  1.00  0.00           N  
ATOM   2139  CA  GLN B 123      14.200  22.364-132.015  1.00  0.00           C  
ATOM   2140  C   GLN B 123      13.765  23.041-133.302  1.00  0.00           C  
ATOM   2141  O   GLN B 123      14.221  22.675-134.379  1.00  0.00           O  
ATOM   2142  CB  GLN B 123      15.191  23.251-131.256  1.00  0.00           C  
ATOM   2143  CG  GLN B 123      15.492  22.781-129.843  1.00  0.00           C  
ATOM   2144  CD  GLN B 123      16.332  23.777-129.068  1.00  0.00           C  
ATOM   2145  NE2 GLN B 123      16.012  23.953-127.791  1.00  0.00           N  
ATOM   2146  OE1 GLN B 123      17.259  24.384-129.611  1.00  0.00           O  
ATOM   2147  N   PRO B 124      12.896  24.060-133.195  1.00  0.00           N  
ATOM   2148  CA  PRO B 124      12.274  24.777-134.315  1.00  0.00           C  
ATOM   2149  C   PRO B 124      13.228  25.350-135.335  1.00  0.00           C  
ATOM   2150  O   PRO B 124      14.218  25.979-134.980  1.00  0.00           O  
ATOM   2151  CB  PRO B 124      11.517  25.900-133.599  1.00  0.00           C  
ATOM   2152  CG  PRO B 124      11.124  25.301-132.292  1.00  0.00           C  
ATOM   2153  CD  PRO B 124      12.310  24.465-131.891  1.00  0.00           C  
ATOM   2154  N   VAL B 125      12.909  25.140-136.606  1.00  0.00           N  
ATOM   2155  CA  VAL B 125      13.719  25.676-137.682  1.00  0.00           C  
ATOM   2156  C   VAL B 125      12.822  26.305-138.754  1.00  0.00           C  
ATOM   2157  O   VAL B 125      11.600  26.184-138.712  1.00  0.00           O  
ATOM   2158  CB  VAL B 125      14.583  24.565-138.308  1.00  0.00           C  
ATOM   2159  CG1 VAL B 125      15.489  23.940-137.257  1.00  0.00           C  
ATOM   2160  CG2 VAL B 125      13.689  23.512-138.945  1.00  0.00           C  
ATOM   2161  N   THR B 126      13.432  26.991-139.711  1.00  0.00           N  
ATOM   2162  CA  THR B 126      12.689  27.541-140.838  1.00  0.00           C  
ATOM   2163  C   THR B 126      13.532  27.317-142.073  1.00  0.00           C  
ATOM   2164  O   THR B 126      14.746  27.344-141.976  1.00  0.00           O  
ATOM   2165  CB  THR B 126      12.375  29.039-140.662  1.00  0.00           C  
ATOM   2166  CG2 THR B 126      13.661  29.848-140.594  1.00  0.00           C  
ATOM   2167  OG1 THR B 126      11.584  29.497-141.765  1.00  0.00           O  
ATOM   2168  N   ARG B 127      12.924  27.090-143.231  1.00  0.00           N  
ATOM   2169  CA  ARG B 127      13.753  26.823-144.394  1.00  0.00           C  
ATOM   2170  C   ARG B 127      14.102  28.130-145.097  1.00  0.00           C  
ATOM   2171  O   ARG B 127      13.265  29.016-145.256  1.00  0.00           O  
ATOM   2172  CB  ARG B 127      13.042  25.891-145.364  1.00  0.00           C  
ATOM   2173  CG  ARG B 127      13.865  25.476-146.573  1.00  0.00           C  
ATOM   2174  CD  ARG B 127      13.197  24.400-147.349  1.00  0.00           C  
ATOM   2175  NE  ARG B 127      13.099  23.164-146.590  1.00  0.00           N  
ATOM   2176  CZ  ARG B 127      14.109  22.289-146.419  1.00  0.00           C  
ATOM   2177  NH1 ARG B 127      15.284  22.527-146.959  1.00  0.00           N1+
ATOM   2178  NH2 ARG B 127      13.919  21.191-145.709  1.00  0.00           N  
ATOM   2179  N   THR B 128      15.359  28.245-145.501  1.00  0.00           N  
ATOM   2180  CA  THR B 128      15.840  29.430-146.172  1.00  0.00           C  
ATOM   2181  C   THR B 128      15.731  29.176-147.664  1.00  0.00           C  
ATOM   2182  O   THR B 128      15.150  29.984-148.389  1.00  0.00           O  
ATOM   2183  CB  THR B 128      17.291  29.769-145.781  1.00  0.00           C  
ATOM   2184  CG2 THR B 128      17.774  30.996-146.540  1.00  0.00           C  
ATOM   2185  OG1 THR B 128      17.361  30.024-144.372  1.00  0.00           O  
ATOM   2186  N   ASP B 129      16.275  28.057-148.117  1.00  0.00           N  
ATOM   2187  CA  ASP B 129      16.282  27.736-149.535  1.00  0.00           C  
ATOM   2188  C   ASP B 129      16.175  26.209-149.689  1.00  0.00           C  
ATOM   2189  O   ASP B 129      15.914  25.503-148.713  1.00  0.00           O  
ATOM   2190  CB  ASP B 129      17.552  28.261-150.209  1.00  0.00           C  
ATOM   2191  CG  ASP B 129      18.814  27.560-149.723  1.00  0.00           C  
ATOM   2192  OD1 ASP B 129      18.780  26.363-149.562  1.00  0.00           O  
ATOM   2193  OD2 ASP B 129      19.798  28.228-149.517  1.00  0.00           O1-
ATOM   2194  N   ASP B 130      16.380  25.698-150.896  1.00  0.00           N  
ATOM   2195  CA  ASP B 130      16.124  24.281-151.150  1.00  0.00           C  
ATOM   2196  C   ASP B 130      16.958  23.303-150.339  1.00  0.00           C  
ATOM   2197  O   ASP B 130      16.585  22.149-150.161  1.00  0.00           O  
ATOM   2198  CB  ASP B 130      16.342  23.986-152.637  1.00  0.00           C  
ATOM   2199  CG  ASP B 130      15.267  24.598-153.525  1.00  0.00           C  
ATOM   2200  OD1 ASP B 130      14.268  25.032-153.003  1.00  0.00           O  
ATOM   2201  OD2 ASP B 130      15.457  24.626-154.718  1.00  0.00           O1-
ATOM   2202  N   ASP B 131      18.077  23.767-149.824  1.00  0.00           N  
ATOM   2203  CA  ASP B 131      18.900  22.896-149.010  1.00  0.00           C  
ATOM   2204  C   ASP B 131      19.489  23.625-147.807  1.00  0.00           C  
ATOM   2205  O   ASP B 131      20.543  23.246-147.292  1.00  0.00           O  
ATOM   2206  CB  ASP B 131      20.028  22.298-149.855  1.00  0.00           C  
ATOM   2207  CG  ASP B 131      20.729  21.134-149.167  1.00  0.00           C  
ATOM   2208  OD1 ASP B 131      20.062  20.366-148.516  1.00  0.00           O  
ATOM   2209  OD2 ASP B 131      21.924  21.025-149.301  1.00  0.00           O1-
ATOM   2210  N   THR B 132      18.792  24.655-147.345  1.00  0.00           N  
ATOM   2211  CA  THR B 132      19.234  25.385-146.180  1.00  0.00           C  
ATOM   2212  C   THR B 132      18.094  25.668-145.217  1.00  0.00           C  
ATOM   2213  O   THR B 132      17.027  26.109-145.625  1.00  0.00           O  
ATOM   2214  CB  THR B 132      19.904  26.710-146.588  1.00  0.00           C  
ATOM   2215  CG2 THR B 132      20.422  27.446-145.362  1.00  0.00           C  
ATOM   2216  OG1 THR B 132      20.996  26.442-147.478  1.00  0.00           O  
ATOM   2217  N   VAL B 133      18.345  25.411-143.937  1.00  0.00           N  
ATOM   2218  CA  VAL B 133      17.390  25.664-142.872  1.00  0.00           C  
ATOM   2219  C   VAL B 133      18.105  26.516-141.831  1.00  0.00           C  
ATOM   2220  O   VAL B 133      19.324  26.572-141.828  1.00  0.00           O  
ATOM   2221  CB  VAL B 133      16.888  24.351-142.242  1.00  0.00           C  
ATOM   2222  CG1 VAL B 133      16.180  23.497-143.283  1.00  0.00           C  
ATOM   2223  CG2 VAL B 133      18.055  23.593-141.627  1.00  0.00           C  
ATOM   2224  N   ALA B 134      17.363  27.172-140.951  1.00  0.00           N  
ATOM   2225  CA  ALA B 134      17.979  28.021-139.927  1.00  0.00           C  
ATOM   2226  C   ALA B 134      17.218  27.923-138.629  1.00  0.00           C  
ATOM   2227  O   ALA B 134      16.043  27.550-138.613  1.00  0.00           O  
ATOM   2228  CB  ALA B 134      18.049  29.468-140.391  1.00  0.00           C  
ATOM   2229  N   ASP B 135      17.900  28.255-137.539  1.00  0.00           N  
ATOM   2230  CA  ASP B 135      17.308  28.204-136.223  1.00  0.00           C  
ATOM   2231  C   ASP B 135      16.216  29.236-136.064  1.00  0.00           C  
ATOM   2232  O   ASP B 135      16.480  30.435-136.036  1.00  0.00           O  
ATOM   2233  CB  ASP B 135      18.378  28.418-135.149  1.00  0.00           C  
ATOM   2234  CG  ASP B 135      17.835  28.268-133.734  1.00  0.00           C  
ATOM   2235  OD1 ASP B 135      16.638  28.201-133.582  1.00  0.00           O  
ATOM   2236  OD2 ASP B 135      18.622  28.222-132.819  1.00  0.00           O1-
ATOM   2237  N   ALA B 136      14.984  28.763-135.982  1.00  0.00           N  
ATOM   2238  CA  ALA B 136      13.855  29.659-135.903  1.00  0.00           C  
ATOM   2239  C   ALA B 136      13.799  29.988-134.420  1.00  0.00           C  
ATOM   2240  O   ALA B 136      12.998  29.415-133.684  1.00  0.00           O  
ATOM   2241  CB  ALA B 136      12.569  29.029-136.418  1.00  0.00           C  
ATOM   2242  N   LYS B 137      14.686  30.884-133.982  1.00  0.00           N  
ATOM   2243  CA  LYS B 137      14.745  31.308-132.579  1.00  0.00           C  
ATOM   2244  C   LYS B 137      13.693  32.380-132.311  1.00  0.00           C  
ATOM   2245  O   LYS B 137      13.691  33.442-132.943  1.00  0.00           O  
ATOM   2246  CB  LYS B 137      16.139  31.830-132.226  1.00  0.00           C  
ATOM   2247  CG  LYS B 137      16.313  32.217-130.763  1.00  0.00           C  
ATOM   2248  CD  LYS B 137      17.736  32.674-130.479  1.00  0.00           C  
ATOM   2249  CE  LYS B 137      17.909  33.074-129.021  1.00  0.00           C  
ATOM   2250  NZ  LYS B 137      19.297  33.523-128.728  1.00  0.00           N1+
ATOM   2251  N   ASP B 138      12.799  32.112-131.371  1.00  0.00           N  
ATOM   2252  CA  ASP B 138      11.802  33.110-131.013  1.00  0.00           C  
ATOM   2253  C   ASP B 138      11.342  32.985-129.564  1.00  0.00           C  
ATOM   2254  O   ASP B 138      10.485  33.751-129.122  1.00  0.00           O  
ATOM   2255  CB  ASP B 138      10.592  32.999-131.944  1.00  0.00           C  
ATOM   2256  CG  ASP B 138       9.871  31.663-131.822  1.00  0.00           C  
ATOM   2257  OD1 ASP B 138      10.156  30.938-130.898  1.00  0.00           O  
ATOM   2258  OD2 ASP B 138       9.042  31.381-132.654  1.00  0.00           O1-
ATOM   2259  N   GLY B 139      11.895  32.015-128.840  1.00  0.00           N  
ATOM   2260  CA  GLY B 139      11.572  31.860-127.427  1.00  0.00           C  
ATOM   2261  C   GLY B 139      10.628  30.739-127.019  1.00  0.00           C  
ATOM   2262  O   GLY B 139      10.443  30.498-125.825  1.00  0.00           O  
ATOM   2263  N   LYS B 140      10.033  30.044-127.981  1.00  0.00           N  
ATOM   2264  CA  LYS B 140       9.134  28.942-127.657  1.00  0.00           C  
ATOM   2265  C   LYS B 140       9.736  27.550-127.976  1.00  0.00           C  
ATOM   2266  O   LYS B 140       9.012  26.578-128.208  1.00  0.00           O  
ATOM   2267  CB  LYS B 140       7.812  29.125-128.405  1.00  0.00           C  
ATOM   2268  CG  LYS B 140       7.065  30.407-128.060  1.00  0.00           C  
ATOM   2269  CD  LYS B 140       6.625  30.414-126.603  1.00  0.00           C  
ATOM   2270  CE  LYS B 140       5.817  31.661-126.275  1.00  0.00           C  
ATOM   2271  NZ  LYS B 140       5.422  31.707-124.841  1.00  0.00           N1+
ATOM   2272  N   GLU B 141      11.057  27.454-127.973  1.00  0.00           N  
ATOM   2273  CA  GLU B 141      11.706  26.178-128.246  1.00  0.00           C  
ATOM   2274  C   GLU B 141      11.594  25.221-127.073  1.00  0.00           C  
ATOM   2275  O   GLU B 141      11.805  25.614-125.933  1.00  0.00           O  
ATOM   2276  CB  GLU B 141      13.181  26.397-128.590  1.00  0.00           C  
ATOM   2277  CG  GLU B 141      13.424  27.403-129.706  1.00  0.00           C  
ATOM   2278  CD  GLU B 141      13.417  28.826-129.223  1.00  0.00           C  
ATOM   2279  OE1 GLU B 141      13.623  29.037-128.052  1.00  0.00           O  
ATOM   2280  OE2 GLU B 141      13.206  29.704-130.027  1.00  0.00           O1-
ATOM   2281  N   ILE B 142      11.260  23.965-127.352  1.00  0.00           N  
ATOM   2282  CA  ILE B 142      11.199  22.972-126.301  1.00  0.00           C  
ATOM   2283  C   ILE B 142      12.648  22.686-125.913  1.00  0.00           C  
ATOM   2284  O   ILE B 142      13.491  22.457-126.763  1.00  0.00           O  
ATOM   2285  CB  ILE B 142      10.485  21.686-126.758  1.00  0.00           C  
ATOM   2286  CG1 ILE B 142       9.013  21.973-127.066  1.00  0.00           C  
ATOM   2287  CG2 ILE B 142      10.608  20.604-125.696  1.00  0.00           C  
ATOM   2288  CD1 ILE B 142       8.299  20.832-127.754  1.00  0.00           C  
ATOM   2289  N   ASP B 143      12.904  22.716-124.614  1.00  0.00           N  
ATOM   2290  CA  ASP B 143      14.195  22.433-124.010  1.00  0.00           C  
ATOM   2291  C   ASP B 143      14.657  21.001-124.171  1.00  0.00           C  
ATOM   2292  O   ASP B 143      13.853  20.070-124.129  1.00  0.00           O  
ATOM   2293  CB  ASP B 143      14.155  22.776-122.519  1.00  0.00           C  
ATOM   2294  CG  ASP B 143      15.531  22.754-121.868  1.00  0.00           C  
ATOM   2295  OD1 ASP B 143      16.140  23.793-121.775  1.00  0.00           O  
ATOM   2296  OD2 ASP B 143      15.960  21.697-121.470  1.00  0.00           O1-
ATOM   2297  N   THR B 144      15.957  20.814-124.335  1.00  0.00           N  
ATOM   2298  CA  THR B 144      16.498  19.469-124.513  1.00  0.00           C  
ATOM   2299  C   THR B 144      16.073  18.460-123.441  1.00  0.00           C  
ATOM   2300  O   THR B 144      15.863  17.285-123.737  1.00  0.00           O  
ATOM   2301  CB  THR B 144      18.036  19.525-124.562  1.00  0.00           C  
ATOM   2302  CG2 THR B 144      18.616  18.126-124.711  1.00  0.00           C  
ATOM   2303  OG1 THR B 144      18.453  20.331-125.672  1.00  0.00           O  
ATOM   2304  N   LYS B 145      15.939  18.907-122.201  1.00  0.00           N  
ATOM   2305  CA  LYS B 145      15.554  17.984-121.145  1.00  0.00           C  
ATOM   2306  C   LYS B 145      14.189  17.345-121.347  1.00  0.00           C  
ATOM   2307  O   LYS B 145      13.918  16.287-120.787  1.00  0.00           O  
ATOM   2308  CB  LYS B 145      15.582  18.706-119.796  1.00  0.00           C  
ATOM   2309  CG  LYS B 145      16.977  19.068-119.306  1.00  0.00           C  
ATOM   2310  CD  LYS B 145      16.923  19.787-117.967  1.00  0.00           C  
ATOM   2311  CE  LYS B 145      18.317  20.147-117.473  1.00  0.00           C  
ATOM   2312  NZ  LYS B 145      18.277  20.884-116.181  1.00  0.00           N1+
ATOM   2313  N   HIS B 146      13.339  17.964-122.160  1.00  0.00           N  
ATOM   2314  CA  HIS B 146      12.030  17.387-122.456  1.00  0.00           C  
ATOM   2315  C   HIS B 146      11.945  16.723-123.819  1.00  0.00           C  
ATOM   2316  O   HIS B 146      10.863  16.328-124.265  1.00  0.00           O  
ATOM   2317  CB  HIS B 146      10.947  18.467-122.361  1.00  0.00           C  
ATOM   2318  CG  HIS B 146      10.804  19.056-120.992  1.00  0.00           C  
ATOM   2319  CD2 HIS B 146      11.148  20.271-120.504  1.00  0.00           C  
ATOM   2320  ND1 HIS B 146      10.242  18.365-119.939  1.00  0.00           N  
ATOM   2321  CE1 HIS B 146      10.248  19.130-118.862  1.00  0.00           C  
ATOM   2322  NE2 HIS B 146      10.792  20.291-119.178  1.00  0.00           N  
ATOM   2323  N   LEU B 147      13.080  16.576-124.481  1.00  0.00           N  
ATOM   2324  CA  LEU B 147      13.090  15.923-125.776  1.00  0.00           C  
ATOM   2325  C   LEU B 147      13.575  14.482-125.746  1.00  0.00           C  
ATOM   2326  O   LEU B 147      14.591  14.162-125.125  1.00  0.00           O  
ATOM   2327  CB  LEU B 147      13.970  16.728-126.741  1.00  0.00           C  
ATOM   2328  CG  LEU B 147      13.527  18.174-126.996  1.00  0.00           C  
ATOM   2329  CD1 LEU B 147      14.543  18.866-127.895  1.00  0.00           C  
ATOM   2330  CD2 LEU B 147      12.144  18.178-127.630  1.00  0.00           C  
ATOM   2331  N   PRO B 148      12.840  13.588-126.418  1.00  0.00           N  
ATOM   2332  CA  PRO B 148      13.233  12.191-126.599  1.00  0.00           C  
ATOM   2333  C   PRO B 148      14.628  12.123-127.207  1.00  0.00           C  
ATOM   2334  O   PRO B 148      15.118  13.087-127.791  1.00  0.00           O  
ATOM   2335  CB  PRO B 148      12.167  11.644-127.554  1.00  0.00           C  
ATOM   2336  CG  PRO B 148      10.982  12.517-127.319  1.00  0.00           C  
ATOM   2337  CD  PRO B 148      11.565  13.887-127.098  1.00  0.00           C  
ATOM   2338  N   SER B 149      15.254  10.965-127.083  1.00  0.00           N  
ATOM   2339  CA  SER B 149      16.616  10.780-127.564  1.00  0.00           C  
ATOM   2340  C   SER B 149      16.578  10.879-129.101  1.00  0.00           C  
ATOM   2341  O   SER B 149      17.586  11.160-129.754  1.00  0.00           O  
ATOM   2342  CB  SER B 149      17.171   9.441-127.119  1.00  0.00           C  
ATOM   2343  OG  SER B 149      16.508   8.385-127.758  1.00  0.00           O  
ATOM   2344  N   THR B 150      15.395  10.647-129.668  1.00  0.00           N  
ATOM   2345  CA  THR B 150      15.203  10.755-131.101  1.00  0.00           C  
ATOM   2346  C   THR B 150      14.993  12.185-131.547  1.00  0.00           C  
ATOM   2347  O   THR B 150      14.910  12.438-132.740  1.00  0.00           O  
ATOM   2348  CB  THR B 150      14.009   9.898-131.558  1.00  0.00           C  
ATOM   2349  CG2 THR B 150      14.225   8.439-131.186  1.00  0.00           C  
ATOM   2350  OG1 THR B 150      12.809  10.374-130.935  1.00  0.00           O  
ATOM   2351  N   CYS B 151      14.881  13.124-130.613  1.00  0.00           N  
ATOM   2352  CA  CYS B 151      14.659  14.510-131.014  1.00  0.00           C  
ATOM   2353  C   CYS B 151      15.733  15.404-130.434  1.00  0.00           C  
ATOM   2354  O   CYS B 151      15.470  16.251-129.587  1.00  0.00           O  
ATOM   2355  CB  CYS B 151      13.287  15.002-130.551  1.00  0.00           C  
ATOM   2356  SG  CYS B 151      12.892  16.688-131.073  1.00  0.00           S  
ATOM   2357  N   ARG B 152      16.958  15.204-130.908  1.00  0.00           N  
ATOM   2358  CA  ARG B 152      18.126  15.890-130.365  1.00  0.00           C  
ATOM   2359  C   ARG B 152      18.954  16.474-131.497  1.00  0.00           C  
ATOM   2360  O   ARG B 152      20.156  16.618-131.339  1.00  0.00           O  
ATOM   2361  CB  ARG B 152      18.984  14.940-129.542  1.00  0.00           C  
ATOM   2362  CG  ARG B 152      18.265  14.274-128.379  1.00  0.00           C  
ATOM   2363  CD  ARG B 152      17.904  15.254-127.323  1.00  0.00           C  
ATOM   2364  NE  ARG B 152      17.251  14.615-126.191  1.00  0.00           N  
ATOM   2365  CZ  ARG B 152      17.899  14.037-125.161  1.00  0.00           C  
ATOM   2366  NH1 ARG B 152      19.213  14.026-125.134  1.00  0.00           N1+
ATOM   2367  NH2 ARG B 152      17.213  13.482-124.177  1.00  0.00           N  
ATOM   2368  N   ASP B 153      18.338  16.807-132.629  1.00  0.00           N  
ATOM   2369  CA  ASP B 153      19.094  17.331-133.770  1.00  0.00           C  
ATOM   2370  C   ASP B 153      19.198  18.864-133.907  1.00  0.00           C  
ATOM   2371  O   ASP B 153      18.300  19.604-133.519  1.00  0.00           O  
ATOM   2372  CB  ASP B 153      18.483  16.773-135.057  1.00  0.00           C  
ATOM   2373  CG  ASP B 153      18.653  15.265-135.189  1.00  0.00           C  
ATOM   2374  OD1 ASP B 153      19.679  14.766-134.791  1.00  0.00           O  
ATOM   2375  OD2 ASP B 153      17.755  14.628-135.685  1.00  0.00           O1-
ATOM   2376  N   ASN B 154      20.305  19.313-134.483  1.00  0.00           N  
ATOM   2377  CA  ASN B 154      20.562  20.731-134.750  1.00  0.00           C  
ATOM   2378  C   ASN B 154      20.322  21.069-136.226  1.00  0.00           C  
ATOM   2379  O   ASN B 154      20.549  20.251-137.118  1.00  0.00           O  
ATOM   2380  CB  ASN B 154      21.974  21.104-134.338  1.00  0.00           C  
ATOM   2381  CG  ASN B 154      22.187  21.009-132.853  1.00  0.00           C  
ATOM   2382  ND2 ASN B 154      23.323  20.493-132.458  1.00  0.00           N  
ATOM   2383  OD1 ASN B 154      21.321  21.402-132.063  1.00  0.00           O  
ATOM   2384  N   PHE B 155      19.867  22.289-136.470  1.00  0.00           N  
ATOM   2385  CA  PHE B 155      19.532  22.725-137.810  1.00  0.00           C  
ATOM   2386  C   PHE B 155      20.720  22.633-138.779  1.00  0.00           C  
ATOM   2387  O   PHE B 155      20.536  22.484-139.993  1.00  0.00           O  
ATOM   2388  CB  PHE B 155      19.012  24.163-137.768  1.00  0.00           C  
ATOM   2389  CG  PHE B 155      20.096  25.196-137.642  1.00  0.00           C  
ATOM   2390  CD1 PHE B 155      20.652  25.780-138.770  1.00  0.00           C  
ATOM   2391  CD2 PHE B 155      20.563  25.584-136.395  1.00  0.00           C  
ATOM   2392  CE1 PHE B 155      21.649  26.730-138.655  1.00  0.00           C  
ATOM   2393  CE2 PHE B 155      21.559  26.534-136.277  1.00  0.00           C  
ATOM   2394  CZ  PHE B 155      22.103  27.107-137.409  1.00  0.00           C  
ATOM   2395  N   ASP B 156      21.945  22.714-138.262  1.00  0.00           N  
ATOM   2396  CA  ASP B 156      23.110  22.605-139.146  1.00  0.00           C  
ATOM   2397  C   ASP B 156      23.655  21.192-139.349  1.00  0.00           C  
ATOM   2398  O   ASP B 156      24.749  21.015-139.883  1.00  0.00           O  
ATOM   2399  CB  ASP B 156      24.237  23.490-138.608  1.00  0.00           C  
ATOM   2400  CG  ASP B 156      24.733  23.050-137.237  1.00  0.00           C  
ATOM   2401  OD1 ASP B 156      24.176  22.126-136.694  1.00  0.00           O  
ATOM   2402  OD2 ASP B 156      25.664  23.642-136.747  1.00  0.00           O1-
ATOM   2403  N   ALA B 157      22.902  20.189-138.922  1.00  0.00           N  
ATOM   2404  CA  ALA B 157      23.330  18.816-139.111  1.00  0.00           C  
ATOM   2405  C   ALA B 157      23.192  18.474-140.589  1.00  0.00           C  
ATOM   2406  O   ALA B 157      22.325  19.006-141.275  1.00  0.00           O  
ATOM   2407  CB  ALA B 157      22.521  17.865-138.242  1.00  0.00           C  
ATOM   2408  N   LYS B 158      24.051  17.599-141.096  1.00  0.00           N  
ATOM   2409  CA  LYS B 158      23.983  17.266-142.511  1.00  0.00           C  
ATOM   2410  C   LYS B 158      23.972  15.756-142.638  1.00  0.00           C  
ATOM   2411  O   LYS B 158      24.377  15.101-141.657  1.00  0.00           O  
ATOM   2412  CB  LYS B 158      25.156  17.868-143.286  1.00  0.00           C  
ATOM   2413  CG  LYS B 158      25.130  17.593-144.783  1.00  0.00           C  
ATOM   2414  CD  LYS B 158      26.311  18.245-145.486  1.00  0.00           C  
ATOM   2415  CE  LYS B 158      26.301  17.947-146.978  1.00  0.00           C  
ATOM   2416  NZ  LYS B 158      27.463  18.561-147.676  1.00  0.00           N1+
ATOM   2417  OXT LYS B 158      23.585  15.242-143.651  1.00  0.00           O1-
TER    2418      LYS B 158 
ATOM   2419  N   PHE C   1      -9.259   1.574 -64.837  1.00  0.00           N  
ATOM   2420  CA  PHE C   1      -8.110   1.589 -63.881  1.00  0.00           C  
ATOM   2421  C   PHE C   1      -6.747   1.631 -64.579  1.00  0.00           C  
ATOM   2422  O   PHE C   1      -5.811   2.248 -64.067  1.00  0.00           O  
ATOM   2423  CB  PHE C   1      -8.159   0.358 -62.972  1.00  0.00           C  
ATOM   2424  CG  PHE C   1      -9.354   0.323 -62.064  1.00  0.00           C  
ATOM   2425  CD1 PHE C   1     -10.273   1.363 -62.061  1.00  0.00           C  
ATOM   2426  CD2 PHE C   1      -9.563  -0.748 -61.209  1.00  0.00           C  
ATOM   2427  CE1 PHE C   1     -11.373   1.332 -61.225  1.00  0.00           C  
ATOM   2428  CE2 PHE C   1     -10.662  -0.783 -60.373  1.00  0.00           C  
ATOM   2429  CZ  PHE C   1     -11.568   0.259 -60.382  1.00  0.00           C  
ATOM   2430  N   THR C   2      -6.642   0.999 -65.754  1.00  0.00           N  
ATOM   2431  CA  THR C   2      -5.384   0.989 -66.515  1.00  0.00           C  
ATOM   2432  C   THR C   2      -5.474   0.770 -68.034  1.00  0.00           C  
ATOM   2433  O   THR C   2      -5.175   1.670 -68.824  1.00  0.00           O  
ATOM   2434  CB  THR C   2      -4.448  -0.087 -65.934  1.00  0.00           C  
ATOM   2435  CG2 THR C   2      -3.150  -0.147 -66.723  1.00  0.00           C  
ATOM   2436  OG1 THR C   2      -4.157   0.220 -64.564  1.00  0.00           O  
ATOM   2437  N   LEU C   3      -5.880  -0.441 -68.416  1.00  0.00           N  
ATOM   2438  CA  LEU C   3      -5.940  -0.872 -69.817  1.00  0.00           C  
ATOM   2439  C   LEU C   3      -7.040  -0.213 -70.656  1.00  0.00           C  
ATOM   2440  O   LEU C   3      -8.037  -0.858 -71.003  1.00  0.00           O  
ATOM   2441  CB  LEU C   3      -6.127  -2.393 -69.866  1.00  0.00           C  
ATOM   2442  CG  LEU C   3      -6.169  -3.013 -71.269  1.00  0.00           C  
ATOM   2443  CD1 LEU C   3      -4.829  -2.798 -71.960  1.00  0.00           C  
ATOM   2444  CD2 LEU C   3      -6.496  -4.495 -71.159  1.00  0.00           C  
ATOM   2445  N   ILE C   4      -6.852   1.062 -70.991  1.00  0.00           N  
ATOM   2446  CA  ILE C   4      -7.776   1.753 -71.891  1.00  0.00           C  
ATOM   2447  C   ILE C   4      -7.083   2.319 -73.142  1.00  0.00           C  
ATOM   2448  O   ILE C   4      -7.736   2.585 -74.152  1.00  0.00           O  
ATOM   2449  CB  ILE C   4      -8.491   2.896 -71.148  1.00  0.00           C  
ATOM   2450  CG1 ILE C   4      -7.478   3.941 -70.674  1.00  0.00           C  
ATOM   2451  CG2 ILE C   4      -9.286   2.349 -69.971  1.00  0.00           C  
ATOM   2452  CD1 ILE C   4      -8.110   5.207 -70.141  1.00  0.00           C  
ATOM   2453  N   GLU C   5      -5.763   2.480 -73.067  1.00  0.00           N  
ATOM   2454  CA  GLU C   5      -4.976   3.044 -74.161  1.00  0.00           C  
ATOM   2455  C   GLU C   5      -4.920   2.084 -75.351  1.00  0.00           C  
ATOM   2456  O   GLU C   5      -5.016   2.507 -76.501  1.00  0.00           O  
ATOM   2457  CB  GLU C   5      -3.557   3.368 -73.686  1.00  0.00           C  
ATOM   2458  CG  GLU C   5      -3.474   4.526 -72.701  1.00  0.00           C  
ATOM   2459  CD  GLU C   5      -2.073   4.785 -72.221  1.00  0.00           C  
ATOM   2460  OE1 GLU C   5      -1.210   3.990 -72.507  1.00  0.00           O  
ATOM   2461  OE2 GLU C   5      -1.865   5.779 -71.566  1.00  0.00           O1-
ATOM   2462  N   LEU C   6      -4.765   0.793 -75.063  1.00  0.00           N  
ATOM   2463  CA  LEU C   6      -4.794  -0.247 -76.089  1.00  0.00           C  
ATOM   2464  C   LEU C   6      -6.108  -0.214 -76.866  1.00  0.00           C  
ATOM   2465  O   LEU C   6      -6.108  -0.235 -78.097  1.00  0.00           O  
ATOM   2466  CB  LEU C   6      -4.603  -1.629 -75.452  1.00  0.00           C  
ATOM   2467  CG  LEU C   6      -4.621  -2.817 -76.422  1.00  0.00           C  
ATOM   2468  CD1 LEU C   6      -3.464  -2.690 -77.403  1.00  0.00           C  
ATOM   2469  CD2 LEU C   6      -4.531  -4.117 -75.635  1.00  0.00           C  
ATOM   2470  N   MET C   7      -7.221  -0.155 -76.134  1.00  0.00           N  
ATOM   2471  CA  MET C   7      -8.552  -0.013 -76.724  1.00  0.00           C  
ATOM   2472  C   MET C   7      -8.676   1.212 -77.635  1.00  0.00           C  
ATOM   2473  O   MET C   7      -9.155   1.097 -78.762  1.00  0.00           O  
ATOM   2474  CB  MET C   7      -9.600   0.051 -75.615  1.00  0.00           C  
ATOM   2475  CG  MET C   7     -11.021   0.288 -76.105  1.00  0.00           C  
ATOM   2476  SD  MET C   7     -12.190   0.535 -74.753  1.00  0.00           S  
ATOM   2477  CE  MET C   7     -11.652   2.122 -74.125  1.00  0.00           C  
ATOM   2478  N   ILE C   8      -8.256   2.376 -77.141  1.00  0.00           N  
ATOM   2479  CA  ILE C   8      -8.340   3.609 -77.927  1.00  0.00           C  
ATOM   2480  C   ILE C   8      -7.538   3.507 -79.226  1.00  0.00           C  
ATOM   2481  O   ILE C   8      -8.056   3.819 -80.300  1.00  0.00           O  
ATOM   2482  CB  ILE C   8      -7.837   4.813 -77.108  1.00  0.00           C  
ATOM   2483  CG1 ILE C   8      -8.794   5.108 -75.951  1.00  0.00           C  
ATOM   2484  CG2 ILE C   8      -7.682   6.035 -78.000  1.00  0.00           C  
ATOM   2485  CD1 ILE C   8      -8.230   6.061 -74.921  1.00  0.00           C  
ATOM   2486  N   VAL C   9      -6.289   3.047 -79.133  1.00  0.00           N  
ATOM   2487  CA  VAL C   9      -5.441   2.858 -80.315  1.00  0.00           C  
ATOM   2488  C   VAL C   9      -6.031   1.862 -81.335  1.00  0.00           C  
ATOM   2489  O   VAL C   9      -6.056   2.148 -82.533  1.00  0.00           O  
ATOM   2490  CB  VAL C   9      -4.050   2.363 -79.878  1.00  0.00           C  
ATOM   2491  CG1 VAL C   9      -3.239   1.917 -81.087  1.00  0.00           C  
ATOM   2492  CG2 VAL C   9      -3.324   3.462 -79.118  1.00  0.00           C  
ATOM   2493  N   ILE C  10      -6.518   0.714 -80.867  1.00  0.00           N  
ATOM   2494  CA  ILE C  10      -7.128  -0.264 -81.773  1.00  0.00           C  
ATOM   2495  C   ILE C  10      -8.345   0.344 -82.484  1.00  0.00           C  
ATOM   2496  O   ILE C  10      -8.519   0.172 -83.694  1.00  0.00           O  
ATOM   2497  CB  ILE C  10      -7.553  -1.533 -81.012  1.00  0.00           C  
ATOM   2498  CG1 ILE C  10      -6.321  -2.307 -80.535  1.00  0.00           C  
ATOM   2499  CG2 ILE C  10      -8.430  -2.412 -81.891  1.00  0.00           C  
ATOM   2500  CD1 ILE C  10      -6.636  -3.409 -79.549  1.00  0.00           C  
ATOM   2501  N   ALA C  11      -9.163   1.069 -81.723  1.00  0.00           N  
ATOM   2502  CA  ALA C  11     -10.336   1.758 -82.256  1.00  0.00           C  
ATOM   2503  C   ALA C  11      -9.990   2.815 -83.309  1.00  0.00           C  
ATOM   2504  O   ALA C  11     -10.703   2.951 -84.306  1.00  0.00           O  
ATOM   2505  CB  ALA C  11     -11.119   2.393 -81.116  1.00  0.00           C  
ATOM   2506  N   ILE C  12      -8.914   3.569 -83.084  1.00  0.00           N  
ATOM   2507  CA  ILE C  12      -8.479   4.580 -84.053  1.00  0.00           C  
ATOM   2508  C   ILE C  12      -8.034   3.936 -85.365  1.00  0.00           C  
ATOM   2509  O   ILE C  12      -8.389   4.415 -86.442  1.00  0.00           O  
ATOM   2510  CB  ILE C  12      -7.328   5.429 -83.482  1.00  0.00           C  
ATOM   2511  CG1 ILE C  12      -7.831   6.308 -82.334  1.00  0.00           C  
ATOM   2512  CG2 ILE C  12      -6.703   6.281 -84.576  1.00  0.00           C  
ATOM   2513  CD1 ILE C  12      -6.725   6.957 -81.533  1.00  0.00           C  
ATOM   2514  N   VAL C  13      -7.253   2.862 -85.267  1.00  0.00           N  
ATOM   2515  CA  VAL C  13      -6.808   2.105 -86.438  1.00  0.00           C  
ATOM   2516  C   VAL C  13      -8.023   1.487 -87.137  1.00  0.00           C  
ATOM   2517  O   VAL C  13      -8.127   1.516 -88.367  1.00  0.00           O  
ATOM   2518  CB  VAL C  13      -5.821   0.995 -86.027  1.00  0.00           C  
ATOM   2519  CG1 VAL C  13      -5.522   0.085 -87.209  1.00  0.00           C  
ATOM   2520  CG2 VAL C  13      -4.542   1.614 -85.485  1.00  0.00           C  
ATOM   2521  N   GLY C  14      -8.941   0.943 -86.338  1.00  0.00           N  
ATOM   2522  CA  GLY C  14     -10.186   0.385 -86.838  1.00  0.00           C  
ATOM   2523  C   GLY C  14     -10.945   1.362 -87.718  1.00  0.00           C  
ATOM   2524  O   GLY C  14     -11.177   1.085 -88.899  1.00  0.00           O  
ATOM   2525  N   ILE C  15     -11.326   2.506 -87.151  1.00  0.00           N  
ATOM   2526  CA  ILE C  15     -12.115   3.504 -87.879  1.00  0.00           C  
ATOM   2527  C   ILE C  15     -11.346   4.101 -89.061  1.00  0.00           C  
ATOM   2528  O   ILE C  15     -11.952   4.501 -90.055  1.00  0.00           O  
ATOM   2529  CB  ILE C  15     -12.556   4.638 -86.936  1.00  0.00           C  
ATOM   2530  CG1 ILE C  15     -13.634   5.497 -87.603  1.00  0.00           C  
ATOM   2531  CG2 ILE C  15     -11.363   5.492 -86.536  1.00  0.00           C  
ATOM   2532  CD1 ILE C  15     -14.927   4.759 -87.866  1.00  0.00           C  
ATOM   2533  N   LEU C  16     -10.019   4.154 -88.943  1.00  0.00           N  
ATOM   2534  CA  LEU C  16      -9.155   4.612 -90.034  1.00  0.00           C  
ATOM   2535  C   LEU C  16      -9.353   3.737 -91.269  1.00  0.00           C  
ATOM   2536  O   LEU C  16      -9.551   4.249 -92.372  1.00  0.00           O  
ATOM   2537  CB  LEU C  16      -7.683   4.580 -89.604  1.00  0.00           C  
ATOM   2538  CG  LEU C  16      -6.666   4.984 -90.679  1.00  0.00           C  
ATOM   2539  CD1 LEU C  16      -6.913   6.429 -91.094  1.00  0.00           C  
ATOM   2540  CD2 LEU C  16      -5.256   4.804 -90.138  1.00  0.00           C  
ATOM   2541  N   ALA C  17      -9.296   2.420 -91.067  1.00  0.00           N  
ATOM   2542  CA  ALA C  17      -9.553   1.449 -92.129  1.00  0.00           C  
ATOM   2543  C   ALA C  17     -10.986   1.557 -92.645  1.00  0.00           C  
ATOM   2544  O   ALA C  17     -11.224   1.447 -93.847  1.00  0.00           O  
ATOM   2545  CB  ALA C  17      -9.269   0.038 -91.634  1.00  0.00           C  
ATOM   2546  N   ALA C  18     -11.926   1.778 -91.726  1.00  0.00           N  
ATOM   2547  CA  ALA C  18     -13.340   1.950 -92.064  1.00  0.00           C  
ATOM   2548  C   ALA C  18     -13.576   3.175 -92.952  1.00  0.00           C  
ATOM   2549  O   ALA C  18     -14.535   3.206 -93.725  1.00  0.00           O  
ATOM   2550  CB  ALA C  18     -14.173   2.051 -90.795  1.00  0.00           C  
ATOM   2551  N   VAL C  19     -12.706   4.174 -92.824  1.00  0.00           N  
ATOM   2552  CA  VAL C  19     -12.703   5.330 -93.724  1.00  0.00           C  
ATOM   2553  C   VAL C  19     -12.058   4.959 -95.063  1.00  0.00           C  
ATOM   2554  O   VAL C  19     -12.621   5.231 -96.127  1.00  0.00           O  
ATOM   2555  CB  VAL C  19     -11.935   6.506 -93.090  1.00  0.00           C  
ATOM   2556  CG1 VAL C  19     -11.708   7.608 -94.114  1.00  0.00           C  
ATOM   2557  CG2 VAL C  19     -12.702   7.037 -91.888  1.00  0.00           C  
ATOM   2558  N   ALA C  20     -10.887   4.329 -95.004  1.00  0.00           N  
ATOM   2559  CA  ALA C  20     -10.085   4.059 -96.198  1.00  0.00           C  
ATOM   2560  C   ALA C  20     -10.853   3.238 -97.240  1.00  0.00           C  
ATOM   2561  O   ALA C  20     -10.868   3.588 -98.424  1.00  0.00           O  
ATOM   2562  CB  ALA C  20      -8.797   3.348 -95.810  1.00  0.00           C  
ATOM   2563  N   LEU C  21     -11.489   2.157 -96.789  1.00  0.00           N  
ATOM   2564  CA  LEU C  21     -12.124   1.189 -97.683  1.00  0.00           C  
ATOM   2565  C   LEU C  21     -13.229   1.800 -98.567  1.00  0.00           C  
ATOM   2566  O   LEU C  21     -13.168   1.648 -99.787  1.00  0.00           O  
ATOM   2567  CB  LEU C  21     -12.715   0.042 -96.853  1.00  0.00           C  
ATOM   2568  CG  LEU C  21     -11.696  -0.929 -96.241  1.00  0.00           C  
ATOM   2569  CD1 LEU C  21     -12.404  -1.861 -95.267  1.00  0.00           C  
ATOM   2570  CD2 LEU C  21     -11.014  -1.714 -97.351  1.00  0.00           C  
ATOM   2571  N   PRO C  22     -14.222   2.484 -97.982  1.00  0.00           N  
ATOM   2572  CA  PRO C  22     -15.284   3.115 -98.781  1.00  0.00           C  
ATOM   2573  C   PRO C  22     -14.808   4.307 -99.614  1.00  0.00           C  
ATOM   2574  O   PRO C  22     -15.447   4.622-100.616  1.00  0.00           O  
ATOM   2575  CB  PRO C  22     -16.283   3.557 -97.708  1.00  0.00           C  
ATOM   2576  CG  PRO C  22     -15.447   3.760 -96.491  1.00  0.00           C  
ATOM   2577  CD  PRO C  22     -14.434   2.647 -96.543  1.00  0.00           C  
ATOM   2578  N   ALA C  23     -13.715   4.948 -99.202  1.00  0.00           N  
ATOM   2579  CA  ALA C  23     -13.057   5.973-100.012  1.00  0.00           C  
ATOM   2580  C   ALA C  23     -12.505   5.382-101.309  1.00  0.00           C  
ATOM   2581  O   ALA C  23     -12.635   5.985-102.375  1.00  0.00           O  
ATOM   2582  CB  ALA C  23     -11.947   6.644 -99.217  1.00  0.00           C  
ATOM   2583  N   TYR C  24     -11.896   4.200-101.202  1.00  0.00           N  
ATOM   2584  CA  TYR C  24     -11.398   3.452-102.355  1.00  0.00           C  
ATOM   2585  C   TYR C  24     -12.556   2.986-103.240  1.00  0.00           C  
ATOM   2586  O   TYR C  24     -12.420   2.920-104.463  1.00  0.00           O  
ATOM   2587  CB  TYR C  24     -10.558   2.257-101.899  1.00  0.00           C  
ATOM   2588  CG  TYR C  24      -9.191   2.635-101.374  1.00  0.00           C  
ATOM   2589  CD1 TYR C  24      -8.793   2.220-100.111  1.00  0.00           C  
ATOM   2590  CD2 TYR C  24      -8.335   3.397-102.155  1.00  0.00           C  
ATOM   2591  CE1 TYR C  24      -7.545   2.566 -99.632  1.00  0.00           C  
ATOM   2592  CE2 TYR C  24      -7.087   3.743-101.676  1.00  0.00           C  
ATOM   2593  CZ  TYR C  24      -6.691   3.330-100.420  1.00  0.00           C  
ATOM   2594  OH  TYR C  24      -5.447   3.675 -99.942  1.00  0.00           O  
ATOM   2595  N   GLN C  25     -13.688   2.666-102.612  1.00  0.00           N  
ATOM   2596  CA  GLN C  25     -14.913   2.309-103.332  1.00  0.00           C  
ATOM   2597  C   GLN C  25     -15.525   3.495-104.073  1.00  0.00           C  
ATOM   2598  O   GLN C  25     -16.094   3.326-105.153  1.00  0.00           O  
ATOM   2599  CB  GLN C  25     -15.943   1.724-102.362  1.00  0.00           C  
ATOM   2600  CG  GLN C  25     -15.556   0.373-101.785  1.00  0.00           C  
ATOM   2601  CD  GLN C  25     -15.462  -0.706-102.848  1.00  0.00           C  
ATOM   2602  NE2 GLN C  25     -14.420  -1.525-102.768  1.00  0.00           N  
ATOM   2603  OE1 GLN C  25     -16.318  -0.802-103.732  1.00  0.00           O  
ATOM   2604  N   ASP C  26     -15.421   4.687-103.489  1.00  0.00           N  
ATOM   2605  CA  ASP C  26     -16.132   5.771-104.680  1.00  0.00           C  
ATOM   2606  C   ASP C  26     -15.161   5.853-105.837  1.00  0.00           C  
ATOM   2607  O   ASP C  26     -15.574   6.019-106.979  1.00  0.00           O  
ATOM   2608  CB  ASP C  26     -16.370   7.206-104.206  1.00  0.00           C  
ATOM   2609  CG  ASP C  26     -17.514   7.318-103.206  1.00  0.00           C  
ATOM   2610  OD1 ASP C  26     -18.196   6.342-103.003  1.00  0.00           O  
ATOM   2611  OD2 ASP C  26     -17.694   8.378-102.656  1.00  0.00           O1-
ATOM   2612  N   TYR C  27     -13.873   5.730-105.547  1.00  0.00           N  
ATOM   2613  CA  TYR C  27     -12.881   5.841-106.596  1.00  0.00           C  
ATOM   2614  C   TYR C  27     -13.218   4.711-107.542  1.00  0.00           C  
ATOM   2615  O   TYR C  27     -13.392   4.900-108.744  1.00  0.00           O  
ATOM   2616  CB  TYR C  27     -11.450   5.737-106.064  1.00  0.00           C  
ATOM   2617  CG  TYR C  27     -10.396   5.713-107.148  1.00  0.00           C  
ATOM   2618  CD1 TYR C  27      -9.999   6.895-107.756  1.00  0.00           C  
ATOM   2619  CD2 TYR C  27      -9.826   4.509-107.534  1.00  0.00           C  
ATOM   2620  CE1 TYR C  27      -9.036   6.873-108.746  1.00  0.00           C  
ATOM   2621  CE2 TYR C  27      -8.863   4.487-108.524  1.00  0.00           C  
ATOM   2622  CZ  TYR C  27      -8.468   5.663-109.129  1.00  0.00           C  
ATOM   2623  OH  TYR C  27      -7.508   5.641-110.115  1.00  0.00           O  
ATOM   2624  N   THR C  28     -13.325   3.528-106.963  1.00  0.00           N  
ATOM   2625  CA  THR C  28     -13.548   2.319-107.720  1.00  0.00           C  
ATOM   2626  C   THR C  28     -14.762   2.418-108.640  1.00  0.00           C  
ATOM   2627  O   THR C  28     -14.709   1.994-109.796  1.00  0.00           O  
ATOM   2628  CB  THR C  28     -13.716   1.116-106.774  1.00  0.00           C  
ATOM   2629  CG2 THR C  28     -14.024  -0.146-107.565  1.00  0.00           C  
ATOM   2630  OG1 THR C  28     -12.510   0.923-106.023  1.00  0.00           O  
ATOM   2631  N   ALA C  29     -15.854   2.978-108.138  1.00  0.00           N  
ATOM   2632  CA  ALA C  29     -17.074   3.125-108.933  1.00  0.00           C  
ATOM   2633  C   ALA C  29     -16.776   3.790-110.262  1.00  0.00           C  
ATOM   2634  O   ALA C  29     -17.180   3.310-111.320  1.00  0.00           O  
ATOM   2635  CB  ALA C  29     -18.122   3.917-108.165  1.00  0.00           C  
ATOM   2636  N   ARG C  30     -16.066   4.906-110.183  1.00  0.00           N  
ATOM   2637  CA  ARG C  30     -15.689   5.688-111.341  1.00  0.00           C  
ATOM   2638  C   ARG C  30     -14.736   4.878-112.190  1.00  0.00           C  
ATOM   2639  O   ARG C  30     -14.831   4.885-113.410  1.00  0.00           O  
ATOM   2640  CB  ARG C  30     -15.032   6.998-110.932  1.00  0.00           C  
ATOM   2641  CG  ARG C  30     -14.707   7.937-112.083  1.00  0.00           C  
ATOM   2642  CD  ARG C  30     -14.180   9.239-111.597  1.00  0.00           C  
ATOM   2643  NE  ARG C  30     -15.145   9.937-110.763  1.00  0.00           N  
ATOM   2644  CZ  ARG C  30     -14.822  10.786-109.767  1.00  0.00           C  
ATOM   2645  NH1 ARG C  30     -13.560  11.030-109.495  1.00  0.00           N1+
ATOM   2646  NH2 ARG C  30     -15.776  11.373-109.065  1.00  0.00           N  
ATOM   2647  N   ALA C  31     -13.818   4.176-111.533  1.00  0.00           N  
ATOM   2648  CA  ALA C  31     -12.830   3.351-112.231  1.00  0.00           C  
ATOM   2649  C   ALA C  31     -13.513   2.270-113.075  1.00  0.00           C  
ATOM   2650  O   ALA C  31     -13.082   1.969-114.187  1.00  0.00           O  
ATOM   2651  CB  ALA C  31     -11.866   2.721-111.237  1.00  0.00           C  
ATOM   2652  N   GLN C  32     -14.589   1.709-112.529  1.00  0.00           N  
ATOM   2653  CA  GLN C  32     -15.415   0.722-113.219  1.00  0.00           C  
ATOM   2654  C   GLN C  32     -16.041   1.313-114.483  1.00  0.00           C  
ATOM   2655  O   GLN C  32     -16.114   0.654-115.521  1.00  0.00           O  
ATOM   2656  CB  GLN C  32     -16.510   0.196-112.288  1.00  0.00           C  
ATOM   2657  CG  GLN C  32     -15.996  -0.661-111.143  1.00  0.00           C  
ATOM   2658  CD  GLN C  32     -17.110  -1.139-110.232  1.00  0.00           C  
ATOM   2659  NE2 GLN C  32     -16.866  -2.238-109.527  1.00  0.00           N  
ATOM   2660  OE1 GLN C  32     -18.180  -0.527-110.162  1.00  0.00           O  
ATOM   2661  N   VAL C  33     -16.517   2.546-114.384  1.00  0.00           N  
ATOM   2662  CA  VAL C  33     -17.092   3.225-115.528  1.00  0.00           C  
ATOM   2663  C   VAL C  33     -16.003   3.426-116.566  1.00  0.00           C  
ATOM   2664  O   VAL C  33     -16.221   3.215-117.759  1.00  0.00           O  
ATOM   2665  CB  VAL C  33     -17.690   4.584-115.120  1.00  0.00           C  
ATOM   2666  CG1 VAL C  33     -18.105   5.375-116.351  1.00  0.00           C  
ATOM   2667  CG2 VAL C  33     -18.875   4.371-114.191  1.00  0.00           C  
ATOM   2668  N   SER C  34     -14.825   3.831-116.105  1.00  0.00           N  
ATOM   2669  CA  SER C  34     -13.745   4.176-117.013  1.00  0.00           C  
ATOM   2670  C   SER C  34     -13.314   2.973-117.833  1.00  0.00           C  
ATOM   2671  O   SER C  34     -12.843   3.116-118.965  1.00  0.00           O  
ATOM   2672  CB  SER C  34     -12.562   4.719-116.235  1.00  0.00           C  
ATOM   2673  OG  SER C  34     -11.924   3.700-115.515  1.00  0.00           O  
ATOM   2674  N   GLU C  35     -13.470   1.789-117.258  1.00  0.00           N  
ATOM   2675  CA  GLU C  35     -13.242   0.569-118.009  1.00  0.00           C  
ATOM   2676  C   GLU C  35     -14.196   0.458-119.163  1.00  0.00           C  
ATOM   2677  O   GLU C  35     -13.796   0.118-120.274  1.00  0.00           O  
ATOM   2678  CB  GLU C  35     -13.385  -0.657-117.104  1.00  0.00           C  
ATOM   2679  CG  GLU C  35     -13.079  -1.982-117.787  1.00  0.00           C  
ATOM   2680  CD  GLU C  35     -13.267  -3.165-116.878  1.00  0.00           C  
ATOM   2681  OE1 GLU C  35     -14.171  -3.138-116.077  1.00  0.00           O  
ATOM   2682  OE2 GLU C  35     -12.507  -4.098-116.986  1.00  0.00           O1-
ATOM   2683  N   ALA C  36     -15.463   0.736-118.900  1.00  0.00           N  
ATOM   2684  CA  ALA C  36     -16.471   0.576-119.925  1.00  0.00           C  
ATOM   2685  C   ALA C  36     -16.035   1.522-121.032  1.00  0.00           C  
ATOM   2686  O   ALA C  36     -16.046   1.179-122.217  1.00  0.00           O  
ATOM   2687  CB  ALA C  36     -17.869   0.889-119.411  1.00  0.00           C  
ATOM   2688  N   ILE C  37     -15.620   2.716-120.626  1.00  0.00           N  
ATOM   2689  CA  ILE C  37     -15.237   3.746-121.567  1.00  0.00           C  
ATOM   2690  C   ILE C  37     -14.050   3.316-122.417  1.00  0.00           C  
ATOM   2691  O   ILE C  37     -14.082   3.440-123.644  1.00  0.00           O  
ATOM   2692  CB  ILE C  37     -14.897   5.053-120.829  1.00  0.00           C  
ATOM   2693  CG1 ILE C  37     -16.156   5.656-120.202  1.00  0.00           C  
ATOM   2694  CG2 ILE C  37     -14.244   6.046-121.779  1.00  0.00           C  
ATOM   2695  CD1 ILE C  37     -15.878   6.790-119.242  1.00  0.00           C  
ATOM   2696  N   LEU C  38     -13.006   2.806-121.782  1.00  0.00           N  
ATOM   2697  CA  LEU C  38     -11.782   2.502-122.517  1.00  0.00           C  
ATOM   2698  C   LEU C  38     -12.017   1.347-123.465  1.00  0.00           C  
ATOM   2699  O   LEU C  38     -11.358   1.231-124.497  1.00  0.00           O  
ATOM   2700  CB  LEU C  38     -10.640   2.159-121.552  1.00  0.00           C  
ATOM   2701  CG  LEU C  38     -10.119   3.322-120.699  1.00  0.00           C  
ATOM   2702  CD1 LEU C  38      -9.020   2.819-119.772  1.00  0.00           C  
ATOM   2703  CD2 LEU C  38      -9.604   4.428-121.607  1.00  0.00           C  
ATOM   2704  N   LEU C  39     -12.970   0.496-123.113  1.00  0.00           N  
ATOM   2705  CA  LEU C  39     -13.376  -0.571-124.004  1.00  0.00           C  
ATOM   2706  C   LEU C  39     -14.079   0.022-125.216  1.00  0.00           C  
ATOM   2707  O   LEU C  39     -13.947  -0.472-126.334  1.00  0.00           O  
ATOM   2708  CB  LEU C  39     -14.302  -1.556-123.280  1.00  0.00           C  
ATOM   2709  CG  LEU C  39     -13.639  -2.425-122.204  1.00  0.00           C  
ATOM   2710  CD1 LEU C  39     -14.713  -3.143-121.397  1.00  0.00           C  
ATOM   2711  CD2 LEU C  39     -12.696  -3.419-122.865  1.00  0.00           C  
ATOM   2712  N   ALA C  40     -14.835   1.086-124.982  1.00  0.00           N  
ATOM   2713  CA  ALA C  40     -15.571   1.734-126.047  1.00  0.00           C  
ATOM   2714  C   ALA C  40     -14.575   2.480-126.920  1.00  0.00           C  
ATOM   2715  O   ALA C  40     -14.753   2.597-128.134  1.00  0.00           O  
ATOM   2716  CB  ALA C  40     -16.634   2.670-125.492  1.00  0.00           C  
ATOM   2717  N   GLU C  41     -13.518   2.978-126.302  1.00  0.00           N  
ATOM   2718  CA  GLU C  41     -12.490   3.709-127.031  1.00  0.00           C  
ATOM   2719  C   GLU C  41     -11.873   2.769-128.064  1.00  0.00           C  
ATOM   2720  O   GLU C  41     -11.619   1.598-127.768  1.00  0.00           O  
ATOM   2721  CB  GLU C  41     -11.416   4.246-126.082  1.00  0.00           C  
ATOM   2722  CG  GLU C  41     -11.915   5.294-125.097  1.00  0.00           C  
ATOM   2723  CD  GLU C  41     -12.321   6.578-125.765  1.00  0.00           C  
ATOM   2724  OE1 GLU C  41     -11.520   7.134-126.478  1.00  0.00           O  
ATOM   2725  OE2 GLU C  41     -13.434   7.004-125.562  1.00  0.00           O1-
ATOM   2726  N   GLY C  42     -11.623   3.270-129.270  1.00  0.00           N  
ATOM   2727  CA  GLY C  42     -11.080   2.411-130.317  1.00  0.00           C  
ATOM   2728  C   GLY C  42     -12.138   2.139-131.372  1.00  0.00           C  
ATOM   2729  O   GLY C  42     -11.862   1.784-132.524  1.00  0.00           O  
ATOM   2730  N   GLN C  43     -13.376   2.292-130.926  1.00  0.00           N  
ATOM   2731  CA  GLN C  43     -14.530   2.084-131.758  1.00  0.00           C  
ATOM   2732  C   GLN C  43     -14.698   3.412-132.463  1.00  0.00           C  
ATOM   2733  O   GLN C  43     -15.349   3.523-133.487  1.00  0.00           O  
ATOM   2734  CB  GLN C  43     -15.773   1.701-130.951  1.00  0.00           C  
ATOM   2735  CG  GLN C  43     -15.640   0.396-130.185  1.00  0.00           C  
ATOM   2736  CD  GLN C  43     -15.390  -0.789-131.098  1.00  0.00           C  
ATOM   2737  NE2 GLN C  43     -14.391  -1.596-130.759  1.00  0.00           N  
ATOM   2738  OE1 GLN C  43     -16.087  -0.977-132.099  1.00  0.00           O  
ATOM   2739  N   LYS C  44     -14.059   4.418-131.892  1.00  0.00           N  
ATOM   2740  CA  LYS C  44     -14.076   5.746-132.452  1.00  0.00           C  
ATOM   2741  C   LYS C  44     -13.441   5.574-133.813  1.00  0.00           C  
ATOM   2742  O   LYS C  44     -13.954   6.062-134.811  1.00  0.00           O  
ATOM   2743  CB  LYS C  44     -13.317   6.754-131.588  1.00  0.00           C  
ATOM   2744  CG  LYS C  44     -14.022   7.127-130.290  1.00  0.00           C  
ATOM   2745  CD  LYS C  44     -13.197   8.114-129.478  1.00  0.00           C  
ATOM   2746  CE  LYS C  44     -13.968   8.615-128.265  1.00  0.00           C  
ATOM   2747  NZ  LYS C  44     -13.104   9.397-127.340  1.00  0.00           N1+
ATOM   2748  N   SER C  45     -12.338   4.836-133.837  1.00  0.00           N  
ATOM   2749  CA  SER C  45     -11.565   4.609-135.050  1.00  0.00           C  
ATOM   2750  C   SER C  45     -12.335   3.766-136.052  1.00  0.00           C  
ATOM   2751  O   SER C  45     -12.440   4.118-137.224  1.00  0.00           O  
ATOM   2752  CB  SER C  45     -10.252   3.929-134.712  1.00  0.00           C  
ATOM   2753  OG  SER C  45      -9.498   3.691-135.868  1.00  0.00           O  
ATOM   2754  N   ALA C  46     -12.864   2.645-135.590  1.00  0.00           N  
ATOM   2755  CA  ALA C  46     -13.575   1.748-136.481  1.00  0.00           C  
ATOM   2756  C   ALA C  46     -14.750   2.481-137.129  1.00  0.00           C  
ATOM   2757  O   ALA C  46     -14.967   2.392-138.338  1.00  0.00           O  
ATOM   2758  CB  ALA C  46     -14.049   0.514-135.728  1.00  0.00           C  
ATOM   2759  N   VAL C  47     -15.495   3.213-136.317  1.00  0.00           N  
ATOM   2760  CA  VAL C  47     -16.642   3.959-136.807  1.00  0.00           C  
ATOM   2761  C   VAL C  47     -16.287   5.124-137.720  1.00  0.00           C  
ATOM   2762  O   VAL C  47     -16.953   5.348-138.723  1.00  0.00           O  
ATOM   2763  CB  VAL C  47     -17.451   4.497-135.612  1.00  0.00           C  
ATOM   2764  CG1 VAL C  47     -18.515   5.476-136.087  1.00  0.00           C  
ATOM   2765  CG2 VAL C  47     -18.081   3.342-134.851  1.00  0.00           C  
ATOM   2766  N   THR C  48     -15.251   5.868-137.371  1.00  0.00           N  
ATOM   2767  CA  THR C  48     -14.855   7.015-138.173  1.00  0.00           C  
ATOM   2768  C   THR C  48     -14.422   6.555-139.557  1.00  0.00           C  
ATOM   2769  O   THR C  48     -14.792   7.132-140.575  1.00  0.00           O  
ATOM   2770  CB  THR C  48     -13.717   7.806-137.501  1.00  0.00           C  
ATOM   2771  CG2 THR C  48     -13.312   8.993-138.362  1.00  0.00           C  
ATOM   2772  OG1 THR C  48     -14.151   8.276-136.218  1.00  0.00           O  
ATOM   2773  N   GLU C  49     -13.622   5.505-139.584  1.00  0.00           N  
ATOM   2774  CA  GLU C  49     -13.163   4.990-140.846  1.00  0.00           C  
ATOM   2775  C   GLU C  49     -14.362   4.574-141.695  1.00  0.00           C  
ATOM   2776  O   GLU C  49     -14.468   4.979-142.855  1.00  0.00           O  
ATOM   2777  CB  GLU C  49     -12.219   3.805-140.632  1.00  0.00           C  
ATOM   2778  CG  GLU C  49     -11.661   3.204-141.914  1.00  0.00           C  
ATOM   2779  CD  GLU C  49     -10.747   2.037-141.665  1.00  0.00           C  
ATOM   2780  OE1 GLU C  49     -10.476   1.753-140.523  1.00  0.00           O  
ATOM   2781  OE2 GLU C  49     -10.319   1.429-142.618  1.00  0.00           O1-
ATOM   2782  N   TYR C  50     -15.284   3.803-141.117  1.00  0.00           N  
ATOM   2783  CA  TYR C  50     -16.457   3.418-141.892  1.00  0.00           C  
ATOM   2784  C   TYR C  50     -17.218   4.633-142.415  1.00  0.00           C  
ATOM   2785  O   TYR C  50     -17.511   4.709-143.601  1.00  0.00           O  
ATOM   2786  CB  TYR C  50     -17.384   2.540-141.047  1.00  0.00           C  
ATOM   2787  CG  TYR C  50     -18.607   2.052-141.791  1.00  0.00           C  
ATOM   2788  CD1 TYR C  50     -18.607   0.795-142.378  1.00  0.00           C  
ATOM   2789  CD2 TYR C  50     -19.730   2.861-141.885  1.00  0.00           C  
ATOM   2790  CE1 TYR C  50     -19.724   0.350-143.057  1.00  0.00           C  
ATOM   2791  CE2 TYR C  50     -20.847   2.416-142.564  1.00  0.00           C  
ATOM   2792  CZ  TYR C  50     -20.847   1.165-143.148  1.00  0.00           C  
ATOM   2793  OH  TYR C  50     -21.960   0.722-143.825  1.00  0.00           O  
ATOM   2794  N   TYR C  51     -17.526   5.583-141.536  1.00  0.00           N  
ATOM   2795  CA  TYR C  51     -18.286   6.762-141.944  1.00  0.00           C  
ATOM   2796  C   TYR C  51     -17.614   7.588-143.062  1.00  0.00           C  
ATOM   2797  O   TYR C  51     -18.271   7.990-144.028  1.00  0.00           O  
ATOM   2798  CB  TYR C  51     -18.541   7.649-140.724  1.00  0.00           C  
ATOM   2799  CG  TYR C  51     -19.330   8.902-141.034  1.00  0.00           C  
ATOM   2800  CD1 TYR C  51     -20.693   8.820-141.280  1.00  0.00           C  
ATOM   2801  CD2 TYR C  51     -18.691  10.132-141.071  1.00  0.00           C  
ATOM   2802  CE1 TYR C  51     -21.414   9.964-141.563  1.00  0.00           C  
ATOM   2803  CE2 TYR C  51     -19.412  11.276-141.355  1.00  0.00           C  
ATOM   2804  CZ  TYR C  51     -20.768  11.195-141.600  1.00  0.00           C  
ATOM   2805  OH  TYR C  51     -21.486  12.334-141.882  1.00  0.00           O  
ATOM   2806  N   LEU C  52     -16.318   7.857-142.918  1.00  0.00           N  
ATOM   2807  CA  LEU C  52     -15.587   8.615-143.931  1.00  0.00           C  
ATOM   2808  C   LEU C  52     -15.471   7.874-145.267  1.00  0.00           C  
ATOM   2809  O   LEU C  52     -15.439   8.496-146.327  1.00  0.00           O  
ATOM   2810  CB  LEU C  52     -14.183   8.949-143.412  1.00  0.00           C  
ATOM   2811  CG  LEU C  52     -14.124   9.950-142.251  1.00  0.00           C  
ATOM   2812  CD1 LEU C  52     -12.680  10.117-141.797  1.00  0.00           C  
ATOM   2813  CD2 LEU C  52     -14.715  11.279-142.695  1.00  0.00           C  
ATOM   2814  N   ASN C  53     -15.425   6.550-145.224  1.00  0.00           N  
ATOM   2815  CA  ASN C  53     -15.334   5.792-146.466  1.00  0.00           C  
ATOM   2816  C   ASN C  53     -16.700   5.517-147.095  1.00  0.00           C  
ATOM   2817  O   ASN C  53     -16.781   5.260-148.290  1.00  0.00           O  
ATOM   2818  CB  ASN C  53     -14.593   4.489-146.228  1.00  0.00           C  
ATOM   2819  CG  ASN C  53     -13.129   4.698-145.954  1.00  0.00           C  
ATOM   2820  ND2 ASN C  53     -12.530   3.775-145.246  1.00  0.00           N  
ATOM   2821  OD1 ASN C  53     -12.541   5.698-146.383  1.00  0.00           O  
ATOM   2822  N   HIS C  54     -17.770   5.580-146.308  1.00  0.00           N  
ATOM   2823  CA  HIS C  54     -19.092   5.262-146.835  1.00  0.00           C  
ATOM   2824  C   HIS C  54     -20.137   6.374-146.827  1.00  0.00           C  
ATOM   2825  O   HIS C  54     -20.968   6.445-147.727  1.00  0.00           O  
ATOM   2826  CB  HIS C  54     -19.659   4.068-146.062  1.00  0.00           C  
ATOM   2827  CG  HIS C  54     -18.891   2.799-146.266  1.00  0.00           C  
ATOM   2828  CD2 HIS C  54     -17.963   2.184-145.495  1.00  0.00           C  
ATOM   2829  ND1 HIS C  54     -19.045   2.008-147.385  1.00  0.00           N  
ATOM   2830  CE1 HIS C  54     -18.244   0.960-147.293  1.00  0.00           C  
ATOM   2831  NE2 HIS C  54     -17.578   1.044-146.156  1.00  0.00           N  
ATOM   2832  N   GLY C  55     -20.106   7.237-145.819  1.00  0.00           N  
ATOM   2833  CA  GLY C  55     -21.058   8.331-145.790  1.00  0.00           C  
ATOM   2834  C   GLY C  55     -22.201   8.084-144.825  1.00  0.00           C  
ATOM   2835  O   GLY C  55     -22.963   8.994-144.530  1.00  0.00           O  
ATOM   2836  N   LYS C  56     -22.333   6.844-144.362  1.00  0.00           N  
ATOM   2837  CA  LYS C  56     -23.386   6.443-143.428  1.00  0.00           C  
ATOM   2838  C   LYS C  56     -22.683   5.856-142.207  1.00  0.00           C  
ATOM   2839  O   LYS C  56     -21.488   5.565-142.274  1.00  0.00           O  
ATOM   2840  CB  LYS C  56     -24.348   5.432-144.054  1.00  0.00           C  
ATOM   2841  CG  LYS C  56     -25.154   5.973-145.227  1.00  0.00           C  
ATOM   2842  CD  LYS C  56     -26.152   7.027-144.773  1.00  0.00           C  
ATOM   2843  CE  LYS C  56     -26.969   7.557-145.942  1.00  0.00           C  
ATOM   2844  NZ  LYS C  56     -27.978   8.560-145.507  1.00  0.00           N1+
ATOM   2845  N   TRP C  57     -23.401   5.710-141.093  1.00  0.00           N  
ATOM   2846  CA  TRP C  57     -22.784   5.253-139.849  1.00  0.00           C  
ATOM   2847  C   TRP C  57     -22.933   3.757-139.714  1.00  0.00           C  
ATOM   2848  O   TRP C  57     -23.900   3.181-140.211  1.00  0.00           O  
ATOM   2849  CB  TRP C  57     -23.416   5.944-138.639  1.00  0.00           C  
ATOM   2850  CG  TRP C  57     -23.211   7.429-138.622  1.00  0.00           C  
ATOM   2851  CD1 TRP C  57     -24.050   8.373-139.135  1.00  0.00           C  
ATOM   2852  CD2 TRP C  57     -22.089   8.151-138.061  1.00  0.00           C  
ATOM   2853  CE2 TRP C  57     -22.330   9.511-138.277  1.00  0.00           C  
ATOM   2854  CE3 TRP C  57     -20.917   7.759-137.402  1.00  0.00           C  
ATOM   2855  NE1 TRP C  57     -23.529   9.627-138.934  1.00  0.00           N  
ATOM   2856  CZ2 TRP C  57     -21.441  10.489-137.860  1.00  0.00           C  
ATOM   2857  CZ3 TRP C  57     -20.027   8.740-136.982  1.00  0.00           C  
ATOM   2858  CH2 TRP C  57     -20.283  10.070-137.205  1.00  0.00           C  
ATOM   2859  N   PRO C  58     -21.977   3.092-139.043  1.00  0.00           N  
ATOM   2860  CA  PRO C  58     -22.080   1.635-138.864  1.00  0.00           C  
ATOM   2861  C   PRO C  58     -23.383   1.253-138.172  1.00  0.00           C  
ATOM   2862  O   PRO C  58     -23.687   1.757-137.093  1.00  0.00           O  
ATOM   2863  CB  PRO C  58     -20.865   1.304-137.993  1.00  0.00           C  
ATOM   2864  CG  PRO C  58     -19.888   2.387-138.301  1.00  0.00           C  
ATOM   2865  CD  PRO C  58     -20.735   3.621-138.461  1.00  0.00           C  
ATOM   2866  N   GLU C  59     -24.153   0.367-138.796  1.00  0.00           N  
ATOM   2867  CA  GLU C  59     -25.385  -0.130-138.182  1.00  0.00           C  
ATOM   2868  C   GLU C  59     -25.181  -1.146-137.074  1.00  0.00           C  
ATOM   2869  O   GLU C  59     -26.007  -1.243-136.173  1.00  0.00           O  
ATOM   2870  CB  GLU C  59     -26.281  -0.749-139.258  1.00  0.00           C  
ATOM   2871  CG  GLU C  59     -26.843   0.250-140.259  1.00  0.00           C  
ATOM   2872  CD  GLU C  59     -27.695  -0.397-141.315  1.00  0.00           C  
ATOM   2873  OE1 GLU C  59     -27.743  -1.602-141.357  1.00  0.00           O  
ATOM   2874  OE2 GLU C  59     -28.298   0.316-142.082  1.00  0.00           O1-
ATOM   2875  N   ASN C  60     -24.093  -1.900-137.155  1.00  0.00           N  
ATOM   2876  CA  ASN C  60     -23.749  -2.859-136.113  1.00  0.00           C  
ATOM   2877  C   ASN C  60     -22.253  -3.134-136.084  1.00  0.00           C  
ATOM   2878  O   ASN C  60     -21.503  -2.597-136.897  1.00  0.00           O  
ATOM   2879  CB  ASN C  60     -24.524  -4.151-136.300  1.00  0.00           C  
ATOM   2880  CG  ASN C  60     -24.262  -4.793-137.634  1.00  0.00           C  
ATOM   2881  ND2 ASN C  60     -25.285  -5.363-138.219  1.00  0.00           N  
ATOM   2882  OD1 ASN C  60     -23.133  -4.773-138.136  1.00  0.00           O  
ATOM   2883  N   ASN C  61     -21.816  -3.970-135.148  1.00  0.00           N  
ATOM   2884  CA  ASN C  61     -20.402  -4.304-135.023  1.00  0.00           C  
ATOM   2885  C   ASN C  61     -19.769  -4.935-136.256  1.00  0.00           C  
ATOM   2886  O   ASN C  61     -18.597  -4.672-136.574  1.00  0.00           O  
ATOM   2887  CB  ASN C  61     -20.205  -5.218-133.827  1.00  0.00           C  
ATOM   2888  CG  ASN C  61     -20.438  -4.515-132.519  1.00  0.00           C  
ATOM   2889  ND2 ASN C  61     -20.137  -5.184-131.435  1.00  0.00           N  
ATOM   2890  OD1 ASN C  61     -20.891  -3.365-132.489  1.00  0.00           O  
ATOM   2891  N   THR C  62     -20.538  -5.776-136.943  1.00  0.00           N  
ATOM   2892  CA  THR C  62     -20.070  -6.415-138.163  1.00  0.00           C  
ATOM   2893  C   THR C  62     -19.808  -5.383-139.240  1.00  0.00           C  
ATOM   2894  O   THR C  62     -18.846  -5.488-139.988  1.00  0.00           O  
ATOM   2895  CB  THR C  62     -21.085  -7.453-138.675  1.00  0.00           C  
ATOM   2896  CG2 THR C  62     -20.596  -8.082-139.971  1.00  0.00           C  
ATOM   2897  OG1 THR C  62     -21.264  -8.478-137.689  1.00  0.00           O  
ATOM   2898  N   SER C  63     -20.662  -4.373-139.313  1.00  0.00           N  
ATOM   2899  CA  SER C  63     -20.479  -3.334-140.307  1.00  0.00           C  
ATOM   2900  C   SER C  63     -19.300  -2.473-139.905  1.00  0.00           C  
ATOM   2901  O   SER C  63     -18.593  -1.946-140.761  1.00  0.00           O  
ATOM   2902  CB  SER C  63     -21.730  -2.487-140.438  1.00  0.00           C  
ATOM   2903  OG  SER C  63     -21.953  -1.738-139.275  1.00  0.00           O  
ATOM   2904  N   ALA C  64     -19.089  -2.328-138.598  1.00  0.00           N  
ATOM   2905  CA  ALA C  64     -17.945  -1.574-138.096  1.00  0.00           C  
ATOM   2906  C   ALA C  64     -16.634  -2.287-138.403  1.00  0.00           C  
ATOM   2907  O   ALA C  64     -15.618  -1.656-138.695  1.00  0.00           O  
ATOM   2908  CB  ALA C  64     -18.082  -1.334-136.600  1.00  0.00           C  
ATOM   2909  N   GLY C  65     -16.670  -3.607-138.349  1.00  0.00           N  
ATOM   2910  CA  GLY C  65     -15.482  -4.377-138.656  1.00  0.00           C  
ATOM   2911  C   GLY C  65     -14.782  -4.795-137.381  1.00  0.00           C  
ATOM   2912  O   GLY C  65     -13.557  -4.965-137.360  1.00  0.00           O  
ATOM   2913  N   VAL C  66     -15.555  -4.938-136.309  1.00  0.00           N  
ATOM   2914  CA  VAL C  66     -15.008  -5.293-135.007  1.00  0.00           C  
ATOM   2915  C   VAL C  66     -15.734  -6.533-134.542  1.00  0.00           C  
ATOM   2916  O   VAL C  66     -16.589  -7.053-135.261  1.00  0.00           O  
ATOM   2917  CB  VAL C  66     -15.192  -4.155-133.986  1.00  0.00           C  
ATOM   2918  CG1 VAL C  66     -14.476  -2.897-134.456  1.00  0.00           C  
ATOM   2919  CG2 VAL C  66     -16.673  -3.884-133.773  1.00  0.00           C  
ATOM   2920  N   ALA C  67     -15.396  -7.003-133.346  1.00  0.00           N  
ATOM   2921  CA  ALA C  67     -16.020  -8.191-132.782  1.00  0.00           C  
ATOM   2922  C   ALA C  67     -17.531  -8.060-132.911  1.00  0.00           C  
ATOM   2923  O   ALA C  67     -18.153  -7.187-132.305  1.00  0.00           O  
ATOM   2924  CB  ALA C  67     -15.609  -8.388-131.330  1.00  0.00           C  
ATOM   2925  N   SER C  68     -18.107  -8.926-133.732  1.00  0.00           N  
ATOM   2926  CA  SER C  68     -19.503  -8.815-134.126  1.00  0.00           C  
ATOM   2927  C   SER C  68     -20.448  -8.815-132.939  1.00  0.00           C  
ATOM   2928  O   SER C  68     -21.414  -8.072-132.915  1.00  0.00           O  
ATOM   2929  CB  SER C  68     -19.865  -9.953-135.059  1.00  0.00           C  
ATOM   2930  OG  SER C  68     -19.173  -9.847-136.272  1.00  0.00           O  
ATOM   2931  N   SER C  69     -20.154  -9.648-131.949  1.00  0.00           N  
ATOM   2932  CA  SER C  69     -20.989  -9.737-130.758  1.00  0.00           C  
ATOM   2933  C   SER C  69     -20.584  -8.690-129.708  1.00  0.00           C  
ATOM   2934  O   SER C  69     -19.409  -8.572-129.366  1.00  0.00           O  
ATOM   2935  CB  SER C  69     -20.893 -11.129-130.165  1.00  0.00           C  
ATOM   2936  OG  SER C  69     -21.702 -11.247-129.027  1.00  0.00           O  
ATOM   2937  N   PRO C  70     -21.554  -7.908-129.193  1.00  0.00           N  
ATOM   2938  CA  PRO C  70     -21.274  -6.913-128.147  1.00  0.00           C  
ATOM   2939  C   PRO C  70     -20.586  -7.546-126.948  1.00  0.00           C  
ATOM   2940  O   PRO C  70     -19.778  -6.917-126.267  1.00  0.00           O  
ATOM   2941  CB  PRO C  70     -22.667  -6.391-127.781  1.00  0.00           C  
ATOM   2942  CG  PRO C  70     -23.468  -6.584-129.023  1.00  0.00           C  
ATOM   2943  CD  PRO C  70     -22.982  -7.895-129.582  1.00  0.00           C  
ATOM   2944  N   THR C  71     -20.919  -8.811-126.714  1.00  0.00           N  
ATOM   2945  CA  THR C  71     -20.408  -9.575-125.582  1.00  0.00           C  
ATOM   2946  C   THR C  71     -18.929  -9.899-125.710  1.00  0.00           C  
ATOM   2947  O   THR C  71     -18.289 -10.305-124.747  1.00  0.00           O  
ATOM   2948  CB  THR C  71     -21.200 -10.884-125.408  1.00  0.00           C  
ATOM   2949  CG2 THR C  71     -22.685 -10.594-125.260  1.00  0.00           C  
ATOM   2950  OG1 THR C  71     -20.992 -11.726-126.550  1.00  0.00           O  
ATOM   2951  N   ASP C  72     -18.375  -9.732-126.895  1.00  0.00           N  
ATOM   2952  CA  ASP C  72     -16.957  -9.979-127.069  1.00  0.00           C  
ATOM   2953  C   ASP C  72     -16.153  -8.719-126.754  1.00  0.00           C  
ATOM   2954  O   ASP C  72     -14.920  -8.731-126.806  1.00  0.00           O  
ATOM   2955  CB  ASP C  72     -16.664 -10.446-128.497  1.00  0.00           C  
ATOM   2956  CG  ASP C  72     -17.248 -11.819-128.803  1.00  0.00           C  
ATOM   2957  OD1 ASP C  72     -17.496 -12.557-127.879  1.00  0.00           O  
ATOM   2958  OD2 ASP C  72     -17.440 -12.117-129.958  1.00  0.00           O1-
ATOM   2959  N   ILE C  73     -16.856  -7.637-126.423  1.00  0.00           N  
ATOM   2960  CA  ILE C  73     -16.213  -6.396-125.995  1.00  0.00           C  
ATOM   2961  C   ILE C  73     -16.609  -6.097-124.551  1.00  0.00           C  
ATOM   2962  O   ILE C  73     -17.351  -5.154-124.262  1.00  0.00           O  
ATOM   2963  CB  ILE C  73     -16.603  -5.216-126.903  1.00  0.00           C  
ATOM   2964  CG1 ILE C  73     -16.288  -5.541-128.366  1.00  0.00           C  
ATOM   2965  CG2 ILE C  73     -15.883  -3.949-126.469  1.00  0.00           C  
ATOM   2966  CD1 ILE C  73     -16.830  -4.527-129.347  1.00  0.00           C  
ATOM   2967  N   LYS C  74     -16.093  -6.917-123.643  1.00  0.00           N  
ATOM   2968  CA  LYS C  74     -16.457  -6.832-122.241  1.00  0.00           C  
ATOM   2969  C   LYS C  74     -15.245  -6.624-121.351  1.00  0.00           C  
ATOM   2970  O   LYS C  74     -14.099  -6.755-121.786  1.00  0.00           O  
ATOM   2971  CB  LYS C  74     -17.208  -8.094-121.813  1.00  0.00           C  
ATOM   2972  CG  LYS C  74     -16.388  -9.374-121.899  1.00  0.00           C  
ATOM   2973  CD  LYS C  74     -17.210 -10.586-121.488  1.00  0.00           C  
ATOM   2974  CE  LYS C  74     -16.376 -11.858-121.516  1.00  0.00           C  
ATOM   2975  NZ  LYS C  74     -17.168 -13.053-121.116  1.00  0.00           N1+
ATOM   2976  N   GLY C  75     -15.523  -6.300-120.096  1.00  0.00           N  
ATOM   2977  CA  GLY C  75     -14.474  -6.036-119.141  1.00  0.00           C  
ATOM   2978  C   GLY C  75     -14.665  -6.859-117.883  1.00  0.00           C  
ATOM   2979  O   GLY C  75     -15.445  -7.813-117.855  1.00  0.00           O  
ATOM   2980  N   LYS C  76     -13.947  -6.480-116.836  1.00  0.00           N  
ATOM   2981  CA  LYS C  76     -14.051  -7.117-115.530  1.00  0.00           C  
ATOM   2982  C   LYS C  76     -15.380  -6.764-114.877  1.00  0.00           C  
ATOM   2983  O   LYS C  76     -16.012  -7.594-114.226  1.00  0.00           O  
ATOM   2984  CB  LYS C  76     -12.888  -6.699-114.629  1.00  0.00           C  
ATOM   2985  CG  LYS C  76     -12.818  -7.448-113.305  1.00  0.00           C  
ATOM   2986  CD  LYS C  76     -11.544  -7.108-112.545  1.00  0.00           C  
ATOM   2987  CE  LYS C  76     -11.319  -8.067-111.385  1.00  0.00           C  
ATOM   2988  NZ  LYS C  76     -12.415  -7.994-110.382  1.00  0.00           N1+
ATOM   2989  N   TYR C  77     -15.795  -5.517-115.058  1.00  0.00           N  
ATOM   2990  CA  TYR C  77     -16.995  -5.008-114.420  1.00  0.00           C  
ATOM   2991  C   TYR C  77     -17.959  -4.554-115.498  1.00  0.00           C  
ATOM   2992  O   TYR C  77     -19.021  -4.004-115.209  1.00  0.00           O  
ATOM   2993  CB  TYR C  77     -16.669  -3.862-113.460  1.00  0.00           C  
ATOM   2994  CG  TYR C  77     -15.666  -4.230-112.389  1.00  0.00           C  
ATOM   2995  CD1 TYR C  77     -14.362  -3.762-112.469  1.00  0.00           C  
ATOM   2996  CD2 TYR C  77     -16.050  -5.035-111.327  1.00  0.00           C  
ATOM   2997  CE1 TYR C  77     -13.447  -4.098-111.491  1.00  0.00           C  
ATOM   2998  CE2 TYR C  77     -15.134  -5.370-110.348  1.00  0.00           C  
ATOM   2999  CZ  TYR C  77     -13.837  -4.905-110.428  1.00  0.00           C  
ATOM   3000  OH  TYR C  77     -12.925  -5.240-109.454  1.00  0.00           O  
ATOM   3001  N   VAL C  78     -17.574  -4.786-116.747  1.00  0.00           N  
ATOM   3002  CA  VAL C  78     -18.329  -4.278-117.873  1.00  0.00           C  
ATOM   3003  C   VAL C  78     -19.002  -5.396-118.630  1.00  0.00           C  
ATOM   3004  O   VAL C  78     -18.376  -6.383-118.986  1.00  0.00           O  
ATOM   3005  CB  VAL C  78     -17.407  -3.499-118.829  1.00  0.00           C  
ATOM   3006  CG1 VAL C  78     -18.191  -2.990-120.029  1.00  0.00           C  
ATOM   3007  CG2 VAL C  78     -16.747  -2.346-118.087  1.00  0.00           C  
ATOM   3008  N   LYS C  79     -20.295  -5.226-118.868  1.00  0.00           N  
ATOM   3009  CA  LYS C  79     -21.090  -6.253-119.522  1.00  0.00           C  
ATOM   3010  C   LYS C  79     -20.747  -6.332-121.005  1.00  0.00           C  
ATOM   3011  O   LYS C  79     -20.295  -7.374-121.484  1.00  0.00           O  
ATOM   3012  CB  LYS C  79     -22.583  -5.978-119.336  1.00  0.00           C  
ATOM   3013  CG  LYS C  79     -23.498  -7.033-119.944  1.00  0.00           C  
ATOM   3014  CD  LYS C  79     -24.962  -6.706-119.692  1.00  0.00           C  
ATOM   3015  CE  LYS C  79     -25.879  -7.729-120.347  1.00  0.00           C  
ATOM   3016  NZ  LYS C  79     -27.315  -7.429-120.099  1.00  0.00           N1+
ATOM   3017  N   GLU C  80     -20.964  -5.224-121.725  1.00  0.00           N  
ATOM   3018  CA  GLU C  80     -20.799  -5.194-123.175  1.00  0.00           C  
ATOM   3019  C   GLU C  80     -20.810  -3.807-123.813  1.00  0.00           C  
ATOM   3020  O   GLU C  80     -21.263  -2.826-123.228  1.00  0.00           O  
ATOM   3021  CB  GLU C  80     -21.897  -6.041-123.822  1.00  0.00           C  
ATOM   3022  CG  GLU C  80     -23.310  -5.534-123.575  1.00  0.00           C  
ATOM   3023  CD  GLU C  80     -24.367  -6.474-124.085  1.00  0.00           C  
ATOM   3024  OE1 GLU C  80     -24.016  -7.476-124.661  1.00  0.00           O  
ATOM   3025  OE2 GLU C  80     -25.526  -6.190-123.899  1.00  0.00           O1-
ATOM   3026  N   VAL C  81     -20.293  -3.757-125.033  1.00  0.00           N  
ATOM   3027  CA  VAL C  81     -20.207  -2.543-125.820  1.00  0.00           C  
ATOM   3028  C   VAL C  81     -20.787  -2.879-127.192  1.00  0.00           C  
ATOM   3029  O   VAL C  81     -20.382  -3.851-127.836  1.00  0.00           O  
ATOM   3030  CB  VAL C  81     -18.752  -2.055-125.949  1.00  0.00           C  
ATOM   3031  CG1 VAL C  81     -18.686  -0.794-126.798  1.00  0.00           C  
ATOM   3032  CG2 VAL C  81     -18.166  -1.806-124.567  1.00  0.00           C  
ATOM   3033  N   GLU C  82     -21.746  -2.069-127.622  1.00  0.00           N  
ATOM   3034  CA  GLU C  82     -22.401  -2.253-128.904  1.00  0.00           C  
ATOM   3035  C   GLU C  82     -22.332  -1.000-129.762  1.00  0.00           C  
ATOM   3036  O   GLU C  82     -22.637   0.102-129.318  1.00  0.00           O  
ATOM   3037  CB  GLU C  82     -23.862  -2.656-128.696  1.00  0.00           C  
ATOM   3038  CG  GLU C  82     -24.637  -2.899-129.983  1.00  0.00           C  
ATOM   3039  CD  GLU C  82     -26.057  -3.327-129.740  1.00  0.00           C  
ATOM   3040  OE1 GLU C  82     -26.433  -3.450-128.599  1.00  0.00           O  
ATOM   3041  OE2 GLU C  82     -26.767  -3.531-130.696  1.00  0.00           O1-
ATOM   3042  N   VAL C  83     -21.896  -1.188-131.001  1.00  0.00           N  
ATOM   3043  CA  VAL C  83     -21.846  -0.116-131.975  1.00  0.00           C  
ATOM   3044  C   VAL C  83     -23.137  -0.248-132.741  1.00  0.00           C  
ATOM   3045  O   VAL C  83     -23.455  -1.323-133.265  1.00  0.00           O  
ATOM   3046  CB  VAL C  83     -20.632  -0.239-132.914  1.00  0.00           C  
ATOM   3047  CG1 VAL C  83     -20.625   0.898-133.926  1.00  0.00           C  
ATOM   3048  CG2 VAL C  83     -19.346  -0.245-132.101  1.00  0.00           C  
ATOM   3049  N   LYS C  84     -23.892   0.835-132.798  1.00  0.00           N  
ATOM   3050  CA  LYS C  84     -25.152   0.840-133.519  1.00  0.00           C  
ATOM   3051  C   LYS C  84     -25.423   2.258-134.000  1.00  0.00           C  
ATOM   3052  O   LYS C  84     -25.574   3.179-133.187  1.00  0.00           O  
ATOM   3053  CB  LYS C  84     -26.296   0.334-132.639  1.00  0.00           C  
ATOM   3054  CG  LYS C  84     -27.637   0.224-133.352  1.00  0.00           C  
ATOM   3055  CD  LYS C  84     -28.697  -0.383-132.445  1.00  0.00           C  
ATOM   3056  CE  LYS C  84     -30.039  -0.491-133.155  1.00  0.00           C  
ATOM   3057  NZ  LYS C  84     -31.084  -1.089-132.281  1.00  0.00           N1+
ATOM   3058  N   ASN C  85     -25.476   2.411-135.324  1.00  0.00           N  
ATOM   3059  CA  ASN C  85     -25.752   3.685-135.985  1.00  0.00           C  
ATOM   3060  C   ASN C  85     -24.737   4.758-135.602  1.00  0.00           C  
ATOM   3061  O   ASN C  85     -25.091   5.915-135.395  1.00  0.00           O  
ATOM   3062  CB  ASN C  85     -27.160   4.152-135.666  1.00  0.00           C  
ATOM   3063  CG  ASN C  85     -28.212   3.210-136.180  1.00  0.00           C  
ATOM   3064  ND2 ASN C  85     -29.271   3.049-135.428  1.00  0.00           N  
ATOM   3065  OD1 ASN C  85     -28.066   2.626-137.261  1.00  0.00           O  
ATOM   3066  N   GLY C  86     -23.473   4.348-135.508  1.00  0.00           N  
ATOM   3067  CA  GLY C  86     -22.407   5.272-135.154  1.00  0.00           C  
ATOM   3068  C   GLY C  86     -22.335   5.617-133.677  1.00  0.00           C  
ATOM   3069  O   GLY C  86     -21.506   6.430-133.274  1.00  0.00           O  
ATOM   3070  N   VAL C  87     -23.210   5.018-132.873  1.00  0.00           N  
ATOM   3071  CA  VAL C  87     -23.238   5.274-131.436  1.00  0.00           C  
ATOM   3072  C   VAL C  87     -22.617   4.070-130.748  1.00  0.00           C  
ATOM   3073  O   VAL C  87     -22.969   2.935-131.055  1.00  0.00           O  
ATOM   3074  CB  VAL C  87     -24.676   5.491-130.930  1.00  0.00           C  
ATOM   3075  CG1 VAL C  87     -24.687   5.689-129.422  1.00  0.00           C  
ATOM   3076  CG2 VAL C  87     -25.297   6.688-131.635  1.00  0.00           C  
ATOM   3077  N   VAL C  88     -21.691   4.312-129.830  1.00  0.00           N  
ATOM   3078  CA  VAL C  88     -21.017   3.220-129.170  1.00  0.00           C  
ATOM   3079  C   VAL C  88     -21.426   3.213-127.704  1.00  0.00           C  
ATOM   3080  O   VAL C  88     -20.965   4.036-126.914  1.00  0.00           O  
ATOM   3081  CB  VAL C  88     -19.488   3.364-129.294  1.00  0.00           C  
ATOM   3082  CG1 VAL C  88     -18.788   2.170-128.662  1.00  0.00           C  
ATOM   3083  CG2 VAL C  88     -19.099   3.505-130.758  1.00  0.00           C  
ATOM   3084  N   THR C  89     -22.324   2.296-127.358  1.00  0.00           N  
ATOM   3085  CA  THR C  89     -22.953   2.270-126.043  1.00  0.00           C  
ATOM   3086  C   THR C  89     -22.378   1.163-125.170  1.00  0.00           C  
ATOM   3087  O   THR C  89     -22.252   0.025-125.607  1.00  0.00           O  
ATOM   3088  CB  THR C  89     -24.478   2.090-126.163  1.00  0.00           C  
ATOM   3089  CG2 THR C  89     -25.114   1.995-124.785  1.00  0.00           C  
ATOM   3090  OG1 THR C  89     -25.039   3.205-126.869  1.00  0.00           O  
ATOM   3091  N   ALA C  90     -22.025   1.489-123.931  1.00  0.00           N  
ATOM   3092  CA  ALA C  90     -21.436   0.489-123.043  1.00  0.00           C  
ATOM   3093  C   ALA C  90     -22.334   0.262-121.843  1.00  0.00           C  
ATOM   3094  O   ALA C  90     -22.903   1.212-121.321  1.00  0.00           O  
ATOM   3095  CB  ALA C  90     -20.043   0.912-122.597  1.00  0.00           C  
ATOM   3096  N   THR C  91     -22.462  -0.992-121.412  1.00  0.00           N  
ATOM   3097  CA  THR C  91     -23.312  -1.314-120.271  1.00  0.00           C  
ATOM   3098  C   THR C  91     -22.549  -2.043-119.177  1.00  0.00           C  
ATOM   3099  O   THR C  91     -21.734  -2.937-119.437  1.00  0.00           O  
ATOM   3100  CB  THR C  91     -24.518  -2.167-120.707  1.00  0.00           C  
ATOM   3101  CG2 THR C  91     -25.392  -2.506-119.510  1.00  0.00           C  
ATOM   3102  OG1 THR C  91     -25.294  -1.444-121.672  1.00  0.00           O  
ATOM   3103  N   MET C  92     -22.815  -1.631-117.941  1.00  0.00           N  
ATOM   3104  CA  MET C  92     -22.119  -2.170-116.785  1.00  0.00           C  
ATOM   3105  C   MET C  92     -22.800  -3.464-116.352  1.00  0.00           C  
ATOM   3106  O   MET C  92     -23.971  -3.689-116.651  1.00  0.00           O  
ATOM   3107  CB  MET C  92     -22.096  -1.154-115.645  1.00  0.00           C  
ATOM   3108  CG  MET C  92     -21.356   0.137-115.967  1.00  0.00           C  
ATOM   3109  SD  MET C  92     -19.617  -0.137-116.358  1.00  0.00           S  
ATOM   3110  CE  MET C  92     -19.005  -0.724-114.781  1.00  0.00           C  
ATOM   3111  N   LEU C  93     -22.055  -4.311-115.657  1.00  0.00           N  
ATOM   3112  CA  LEU C  93     -22.616  -5.492-115.016  1.00  0.00           C  
ATOM   3113  C   LEU C  93     -23.356  -5.071-113.743  1.00  0.00           C  
ATOM   3114  O   LEU C  93     -23.446  -3.883-113.421  1.00  0.00           O  
ATOM   3115  CB  LEU C  93     -21.512  -6.503-114.683  1.00  0.00           C  
ATOM   3116  CG  LEU C  93     -20.827  -7.162-115.887  1.00  0.00           C  
ATOM   3117  CD1 LEU C  93     -19.606  -7.939-115.415  1.00  0.00           C  
ATOM   3118  CD2 LEU C  93     -21.816  -8.075-116.597  1.00  0.00           C  
ATOM   3119  N   SER C  94     -23.894  -6.050-113.023  1.00  0.00           N  
ATOM   3120  CA  SER C  94     -24.467  -5.787-111.713  1.00  0.00           C  
ATOM   3121  C   SER C  94     -23.754  -6.655-110.690  1.00  0.00           C  
ATOM   3122  O   SER C  94     -23.955  -6.502-109.488  1.00  0.00           O  
ATOM   3123  CB  SER C  94     -25.956  -6.075-111.707  1.00  0.00           C  
ATOM   3124  OG  SER C  94     -26.206  -7.432-111.948  1.00  0.00           O  
ATOM   3125  N   SER C  95     -22.917  -7.563-111.182  1.00  0.00           N  
ATOM   3126  CA  SER C  95     -22.129  -8.443-110.322  1.00  0.00           C  
ATOM   3127  C   SER C  95     -20.700  -7.929-110.157  1.00  0.00           C  
ATOM   3128  O   SER C  95     -19.896  -7.981-111.092  1.00  0.00           O  
ATOM   3129  CB  SER C  95     -22.107  -9.847-110.896  1.00  0.00           C  
ATOM   3130  OG  SER C  95     -21.286 -10.688-110.134  1.00  0.00           O  
ATOM   3131  N   GLY C  96     -20.396  -7.434-108.960  1.00  0.00           N  
ATOM   3132  CA  GLY C  96     -19.128  -6.767-108.728  1.00  0.00           C  
ATOM   3133  C   GLY C  96     -19.153  -5.267-108.954  1.00  0.00           C  
ATOM   3134  O   GLY C  96     -18.227  -4.561-108.550  1.00  0.00           O  
ATOM   3135  N   VAL C  97     -20.211  -4.769-109.591  1.00  0.00           N  
ATOM   3136  CA  VAL C  97     -20.349  -3.330-109.814  1.00  0.00           C  
ATOM   3137  C   VAL C  97     -21.030  -2.569-108.664  1.00  0.00           C  
ATOM   3138  O   VAL C  97     -22.002  -3.043-108.078  1.00  0.00           O  
ATOM   3139  CB  VAL C  97     -21.151  -3.092-111.107  1.00  0.00           C  
ATOM   3140  CG1 VAL C  97     -21.408  -1.606-111.308  1.00  0.00           C  
ATOM   3141  CG2 VAL C  97     -20.401  -3.675-112.296  1.00  0.00           C  
ATOM   3142  N   ASN C  98     -20.505  -1.389-108.350  1.00  0.00           N  
ATOM   3143  CA  ASN C  98     -20.883  -0.653-107.153  1.00  0.00           C  
ATOM   3144  C   ASN C  98     -22.341  -0.867-106.784  1.00  0.00           C  
ATOM   3145  O   ASN C  98     -22.674  -1.774-106.020  1.00  0.00           O  
ATOM   3146  CB  ASN C  98     -20.596   0.827-107.331  1.00  0.00           C  
ATOM   3147  CG  ASN C  98     -20.969   1.638-106.122  1.00  0.00           C  
ATOM   3148  ND2 ASN C  98     -20.082   1.695-105.161  1.00  0.00           N  
ATOM   3149  OD1 ASN C  98     -22.061   2.213-106.057  1.00  0.00           O  
ATOM   3150  N   ASN C  99     -23.210  -0.028-107.328  1.00  0.00           N  
ATOM   3151  CA  ASN C  99     -24.633  -0.115-107.044  1.00  0.00           C  
ATOM   3152  C   ASN C  99     -25.309   1.086-107.687  1.00  0.00           C  
ATOM   3153  O   ASN C  99     -26.422   0.993-108.202  1.00  0.00           O  
ATOM   3154  CB  ASN C  99     -24.901  -0.172-105.551  1.00  0.00           C  
ATOM   3155  CG  ASN C  99     -26.363  -0.319-105.232  1.00  0.00           C  
ATOM   3156  ND2 ASN C  99     -26.705  -0.163-103.979  1.00  0.00           N  
ATOM   3157  OD1 ASN C  99     -27.183  -0.574-106.121  1.00  0.00           O  
ATOM   3158  N   GLU C 100     -24.631   2.224-107.654  1.00  0.00           N  
ATOM   3159  CA  GLU C 100     -25.199   3.424-108.236  1.00  0.00           C  
ATOM   3160  C   GLU C 100     -24.949   3.450-109.727  1.00  0.00           C  
ATOM   3161  O   GLU C 100     -25.551   4.236-110.449  1.00  0.00           O  
ATOM   3162  CB  GLU C 100     -24.608   4.675-107.583  1.00  0.00           C  
ATOM   3163  CG  GLU C 100     -24.975   4.852-106.116  1.00  0.00           C  
ATOM   3164  CD  GLU C 100     -24.450   6.134-105.532  1.00  0.00           C  
ATOM   3165  OE1 GLU C 100     -23.761   6.842-106.226  1.00  0.00           O  
ATOM   3166  OE2 GLU C 100     -24.738   6.405-104.390  1.00  0.00           O1-
ATOM   3167  N   ILE C 101     -24.059   2.581-110.193  1.00  0.00           N  
ATOM   3168  CA  ILE C 101     -23.852   2.429-111.628  1.00  0.00           C  
ATOM   3169  C   ILE C 101     -24.135   1.018-112.158  1.00  0.00           C  
ATOM   3170  O   ILE C 101     -23.791   0.706-113.297  1.00  0.00           O  
ATOM   3171  CB  ILE C 101     -22.408   2.818-111.992  1.00  0.00           C  
ATOM   3172  CG1 ILE C 101     -21.410   1.929-111.245  1.00  0.00           C  
ATOM   3173  CG2 ILE C 101     -22.157   4.285-111.678  1.00  0.00           C  
ATOM   3174  CD1 ILE C 101     -19.988   2.057-111.740  1.00  0.00           C  
ATOM   3175  N   LYS C 102     -24.767   0.170-111.353  1.00  0.00           N  
ATOM   3176  CA  LYS C 102     -24.988  -1.210-111.765  1.00  0.00           C  
ATOM   3177  C   LYS C 102     -26.016  -1.316-112.880  1.00  0.00           C  
ATOM   3178  O   LYS C 102     -27.168  -0.891-112.733  1.00  0.00           O  
ATOM   3179  CB  LYS C 102     -25.430  -2.057-110.570  1.00  0.00           C  
ATOM   3180  CG  LYS C 102     -26.861  -1.803-110.115  1.00  0.00           C  
ATOM   3181  CD  LYS C 102     -27.214  -2.653-108.903  1.00  0.00           C  
ATOM   3182  CE  LYS C 102     -28.675  -2.485-108.515  1.00  0.00           C  
ATOM   3183  NZ  LYS C 102     -28.986  -1.088-108.108  1.00  0.00           N1+
ATOM   3184  N   GLY C 103     -25.587  -1.898-113.996  1.00  0.00           N  
ATOM   3185  CA  GLY C 103     -26.499  -2.138-115.091  1.00  0.00           C  
ATOM   3186  C   GLY C 103     -26.813  -0.806-115.743  1.00  0.00           C  
ATOM   3187  O   GLY C 103     -27.826  -0.660-116.426  1.00  0.00           O  
ATOM   3188  N   LYS C 104     -25.948   0.182-115.531  1.00  0.00           N  
ATOM   3189  CA  LYS C 104     -26.176   1.496-116.117  1.00  0.00           C  
ATOM   3190  C   LYS C 104     -25.195   1.729-117.250  1.00  0.00           C  
ATOM   3191  O   LYS C 104     -24.251   0.959-117.429  1.00  0.00           O  
ATOM   3192  CB  LYS C 104     -26.044   2.597-115.063  1.00  0.00           C  
ATOM   3193  CG  LYS C 104     -27.141   2.590-114.006  1.00  0.00           C  
ATOM   3194  CD  LYS C 104     -27.131   3.875-113.191  1.00  0.00           C  
ATOM   3195  CE  LYS C 104     -28.221   3.866-112.130  1.00  0.00           C  
ATOM   3196  NZ  LYS C 104     -28.107   5.028-111.206  1.00  0.00           N1+
ATOM   3197  N   LYS C 105     -25.420   2.784-118.025  1.00  0.00           N  
ATOM   3198  CA  LYS C 105     -24.724   2.896-119.298  1.00  0.00           C  
ATOM   3199  C   LYS C 105     -24.305   4.287-119.787  1.00  0.00           C  
ATOM   3200  O   LYS C 105     -24.672   5.307-119.209  1.00  0.00           O  
ATOM   3201  CB  LYS C 105     -25.595   2.248-120.375  1.00  0.00           C  
ATOM   3202  CG  LYS C 105     -27.023   2.775-120.431  1.00  0.00           C  
ATOM   3203  CD  LYS C 105     -27.844   2.037-121.478  1.00  0.00           C  
ATOM   3204  CE  LYS C 105     -29.275   2.551-121.523  1.00  0.00           C  
ATOM   3205  NZ  LYS C 105     -30.108   1.795-122.497  1.00  0.00           N1+
ATOM   3206  N   LEU C 106     -23.505   4.284-120.855  1.00  0.00           N  
ATOM   3207  CA  LEU C 106     -22.984   5.490-121.479  1.00  0.00           C  
ATOM   3208  C   LEU C 106     -22.846   5.278-122.996  1.00  0.00           C  
ATOM   3209  O   LEU C 106     -22.900   4.142-123.479  1.00  0.00           O  
ATOM   3210  CB  LEU C 106     -21.626   5.862-120.869  1.00  0.00           C  
ATOM   3211  CG  LEU C 106     -20.536   4.788-120.968  1.00  0.00           C  
ATOM   3212  CD1 LEU C 106     -19.838   4.894-122.317  1.00  0.00           C  
ATOM   3213  CD2 LEU C 106     -19.546   4.962-119.825  1.00  0.00           C  
ATOM   3214  N   SER C 107     -22.681   6.364-123.750  1.00  0.00           N  
ATOM   3215  CA  SER C 107     -22.448   6.251-125.180  1.00  0.00           C  
ATOM   3216  C   SER C 107     -21.335   7.145-125.663  1.00  0.00           C  
ATOM   3217  O   SER C 107     -20.931   8.089-124.997  1.00  0.00           O  
ATOM   3218  CB  SER C 107     -23.719   6.581-125.937  1.00  0.00           C  
ATOM   3219  OG  SER C 107     -24.768   5.737-125.548  1.00  0.00           O  
ATOM   3220  N   LEU C 108     -20.859   6.828-126.855  1.00  0.00           N  
ATOM   3221  CA  LEU C 108     -19.957   7.668-127.607  1.00  0.00           C  
ATOM   3222  C   LEU C 108     -20.820   8.039-128.783  1.00  0.00           C  
ATOM   3223  O   LEU C 108     -21.667   7.253-129.194  1.00  0.00           O  
ATOM   3224  CB  LEU C 108     -18.677   6.940-128.036  1.00  0.00           C  
ATOM   3225  CG  LEU C 108     -17.848   6.327-126.900  1.00  0.00           C  
ATOM   3226  CD1 LEU C 108     -16.644   5.601-127.484  1.00  0.00           C  
ATOM   3227  CD2 LEU C 108     -17.412   7.423-125.940  1.00  0.00           C  
ATOM   3228  N   TRP C 109     -20.646   9.245-129.304  1.00  0.00           N  
ATOM   3229  CA  TRP C 109     -21.366   9.633-130.496  1.00  0.00           C  
ATOM   3230  C   TRP C 109     -20.550  10.702-131.135  1.00  0.00           C  
ATOM   3231  O   TRP C 109     -19.604  11.202-130.540  1.00  0.00           O  
ATOM   3232  CB  TRP C 109     -22.773  10.145-130.179  1.00  0.00           C  
ATOM   3233  CG  TRP C 109     -22.784  11.361-129.303  1.00  0.00           C  
ATOM   3234  CD1 TRP C 109     -22.842  12.659-129.711  1.00  0.00           C  
ATOM   3235  CD2 TRP C 109     -22.736  11.397-127.856  1.00  0.00           C  
ATOM   3236  CE2 TRP C 109     -22.770  12.743-127.481  1.00  0.00           C  
ATOM   3237  CE3 TRP C 109     -22.670  10.411-126.864  1.00  0.00           C  
ATOM   3238  NE1 TRP C 109     -22.832  13.498-128.625  1.00  0.00           N  
ATOM   3239  CZ2 TRP C 109     -22.737  13.135-126.152  1.00  0.00           C  
ATOM   3240  CZ3 TRP C 109     -22.639  10.804-125.531  1.00  0.00           C  
ATOM   3241  CH2 TRP C 109     -22.672  12.132-125.185  1.00  0.00           C  
ATOM   3242  N   ALA C 110     -20.893  11.061-132.355  1.00  0.00           N  
ATOM   3243  CA  ALA C 110     -20.080  12.019-133.059  1.00  0.00           C  
ATOM   3244  C   ALA C 110     -20.899  12.867-133.994  1.00  0.00           C  
ATOM   3245  O   ALA C 110     -21.929  12.439-134.522  1.00  0.00           O  
ATOM   3246  CB  ALA C 110     -18.970  11.310-133.820  1.00  0.00           C  
ATOM   3247  N   ARG C 111     -20.418  14.079-134.220  1.00  0.00           N  
ATOM   3248  CA  ARG C 111     -21.044  14.967-135.168  1.00  0.00           C  
ATOM   3249  C   ARG C 111     -20.138  15.139-136.365  1.00  0.00           C  
ATOM   3250  O   ARG C 111     -18.925  14.994-136.265  1.00  0.00           O  
ATOM   3251  CB  ARG C 111     -21.334  16.322-134.539  1.00  0.00           C  
ATOM   3252  CG  ARG C 111     -22.297  16.288-133.363  1.00  0.00           C  
ATOM   3253  CD  ARG C 111     -23.676  15.940-133.793  1.00  0.00           C  
ATOM   3254  NE  ARG C 111     -24.169  16.844-134.819  1.00  0.00           N  
ATOM   3255  CZ  ARG C 111     -24.748  18.036-134.574  1.00  0.00           C  
ATOM   3256  NH1 ARG C 111     -24.899  18.451-133.336  1.00  0.00           N1+
ATOM   3257  NH2 ARG C 111     -25.164  18.787-135.578  1.00  0.00           N  
ATOM   3258  N   ARG C 112     -20.744  15.435-137.503  1.00  0.00           N  
ATOM   3259  CA  ARG C 112     -20.004  15.591-138.745  1.00  0.00           C  
ATOM   3260  C   ARG C 112     -19.280  16.930-138.745  1.00  0.00           C  
ATOM   3261  O   ARG C 112     -19.903  17.980-138.613  1.00  0.00           O  
ATOM   3262  CB  ARG C 112     -20.933  15.507-139.947  1.00  0.00           C  
ATOM   3263  CG  ARG C 112     -20.238  15.575-141.298  1.00  0.00           C  
ATOM   3264  CD  ARG C 112     -21.215  15.620-142.416  1.00  0.00           C  
ATOM   3265  NE  ARG C 112     -20.560  15.801-143.701  1.00  0.00           N  
ATOM   3266  CZ  ARG C 112     -20.183  14.796-144.516  1.00  0.00           C  
ATOM   3267  NH1 ARG C 112     -20.402  13.548-144.165  1.00  0.00           N1+
ATOM   3268  NH2 ARG C 112     -19.592  15.065-145.667  1.00  0.00           N  
ATOM   3269  N   GLU C 113     -17.961  16.897-138.867  1.00  0.00           N  
ATOM   3270  CA  GLU C 113     -17.221  18.139-139.001  1.00  0.00           C  
ATOM   3271  C   GLU C 113     -17.126  18.430-140.485  1.00  0.00           C  
ATOM   3272  O   GLU C 113     -16.963  19.578-140.899  1.00  0.00           O  
ATOM   3273  CB  GLU C 113     -15.829  18.038-138.374  1.00  0.00           C  
ATOM   3274  CG  GLU C 113     -15.831  17.885-136.860  1.00  0.00           C  
ATOM   3275  CD  GLU C 113     -14.448  17.792-136.278  1.00  0.00           C  
ATOM   3276  OE1 GLU C 113     -13.637  17.091-136.833  1.00  0.00           O  
ATOM   3277  OE2 GLU C 113     -14.202  18.424-135.278  1.00  0.00           O1-
ATOM   3278  N   ASN C 114     -17.254  17.364-141.272  1.00  0.00           N  
ATOM   3279  CA  ASN C 114     -17.274  17.435-142.726  1.00  0.00           C  
ATOM   3280  C   ASN C 114     -15.847  17.175-143.183  1.00  0.00           C  
ATOM   3281  O   ASN C 114     -15.018  18.085-143.229  1.00  0.00           O  
ATOM   3282  CB  ASN C 114     -17.792  18.772-143.224  1.00  0.00           C  
ATOM   3283  CG  ASN C 114     -18.181  18.736-144.676  1.00  0.00           C  
ATOM   3284  ND2 ASN C 114     -17.779  19.739-145.414  1.00  0.00           N  
ATOM   3285  OD1 ASN C 114     -18.846  17.798-145.130  1.00  0.00           O  
ATOM   3286  N   GLY C 115     -15.566  15.917-143.501  1.00  0.00           N  
ATOM   3287  CA  GLY C 115     -14.199  15.513-143.790  1.00  0.00           C  
ATOM   3288  C   GLY C 115     -13.634  14.776-142.586  1.00  0.00           C  
ATOM   3289  O   GLY C 115     -12.598  14.111-142.661  1.00  0.00           O  
ATOM   3290  N   SER C 116     -14.327  14.913-141.462  1.00  0.00           N  
ATOM   3291  CA  SER C 116     -13.943  14.281-140.206  1.00  0.00           C  
ATOM   3292  C   SER C 116     -15.154  14.352-139.274  1.00  0.00           C  
ATOM   3293  O   SER C 116     -16.182  14.934-139.626  1.00  0.00           O  
ATOM   3294  CB  SER C 116     -12.743  14.973-139.590  1.00  0.00           C  
ATOM   3295  OG  SER C 116     -13.057  16.287-139.219  1.00  0.00           O  
ATOM   3296  N   VAL C 117     -15.036  13.749-138.096  1.00  0.00           N  
ATOM   3297  CA  VAL C 117     -16.124  13.779-137.134  1.00  0.00           C  
ATOM   3298  C   VAL C 117     -15.602  14.189-135.762  1.00  0.00           C  
ATOM   3299  O   VAL C 117     -14.433  13.994-135.456  1.00  0.00           O  
ATOM   3300  CB  VAL C 117     -16.799  12.397-137.041  1.00  0.00           C  
ATOM   3301  CG1 VAL C 117     -17.392  12.002-138.385  1.00  0.00           C  
ATOM   3302  CG2 VAL C 117     -15.791  11.360-136.569  1.00  0.00           C  
ATOM   3303  N   LYS C 118     -16.472  14.786-134.954  1.00  0.00           N  
ATOM   3304  CA  LYS C 118     -16.098  15.230-133.627  1.00  0.00           C  
ATOM   3305  C   LYS C 118     -16.731  14.275-132.610  1.00  0.00           C  
ATOM   3306  O   LYS C 118     -17.960  14.198-132.498  1.00  0.00           O  
ATOM   3307  CB  LYS C 118     -16.545  16.673-133.383  1.00  0.00           C  
ATOM   3308  CG  LYS C 118     -16.117  17.244-132.038  1.00  0.00           C  
ATOM   3309  CD  LYS C 118     -16.510  18.708-131.909  1.00  0.00           C  
ATOM   3310  CE  LYS C 118     -16.122  19.269-130.549  1.00  0.00           C  
ATOM   3311  NZ  LYS C 118     -16.514  20.697-130.403  1.00  0.00           N1+
ATOM   3312  N   TRP C 119     -15.897  13.550-131.871  1.00  0.00           N  
ATOM   3313  CA  TRP C 119     -16.407  12.591-130.901  1.00  0.00           C  
ATOM   3314  C   TRP C 119     -16.688  13.126-129.500  1.00  0.00           C  
ATOM   3315  O   TRP C 119     -15.936  13.939-128.952  1.00  0.00           O  
ATOM   3316  CB  TRP C 119     -15.416  11.432-130.784  1.00  0.00           C  
ATOM   3317  CG  TRP C 119     -15.501  10.455-131.917  1.00  0.00           C  
ATOM   3318  CD1 TRP C 119     -14.725  10.434-133.037  1.00  0.00           C  
ATOM   3319  CD2 TRP C 119     -16.421   9.343-132.047  1.00  0.00           C  
ATOM   3320  CE2 TRP C 119     -16.132   8.714-133.261  1.00  0.00           C  
ATOM   3321  CE3 TRP C 119     -17.451   8.840-131.242  1.00  0.00           C  
ATOM   3322  NE1 TRP C 119     -15.096   9.393-133.851  1.00  0.00           N  
ATOM   3323  CZ2 TRP C 119     -16.836   7.603-133.697  1.00  0.00           C  
ATOM   3324  CZ3 TRP C 119     -18.156   7.725-131.679  1.00  0.00           C  
ATOM   3325  CH2 TRP C 119     -17.855   7.122-132.875  1.00  0.00           C  
ATOM   3326  N   PHE C 120     -17.768  12.632-128.920  1.00  0.00           N  
ATOM   3327  CA  PHE C 120     -18.204  13.070-127.608  1.00  0.00           C  
ATOM   3328  C   PHE C 120     -18.368  11.830-126.759  1.00  0.00           C  
ATOM   3329  O   PHE C 120     -18.636  10.752-127.278  1.00  0.00           O  
ATOM   3330  CB  PHE C 120     -19.517  13.851-127.682  1.00  0.00           C  
ATOM   3331  CG  PHE C 120     -19.451  15.066-128.564  1.00  0.00           C  
ATOM   3332  CD1 PHE C 120     -19.814  14.991-129.900  1.00  0.00           C  
ATOM   3333  CD2 PHE C 120     -19.026  16.285-128.059  1.00  0.00           C  
ATOM   3334  CE1 PHE C 120     -19.753  16.108-130.712  1.00  0.00           C  
ATOM   3335  CE2 PHE C 120     -18.965  17.403-128.867  1.00  0.00           C  
ATOM   3336  CZ  PHE C 120     -19.329  17.314-130.196  1.00  0.00           C  
ATOM   3337  N   CYS C 121     -18.199  11.993-125.452  1.00  0.00           N  
ATOM   3338  CA  CYS C 121     -18.293  10.880-124.515  1.00  0.00           C  
ATOM   3339  C   CYS C 121     -19.164  11.335-123.354  1.00  0.00           C  
ATOM   3340  O   CYS C 121     -18.848  12.316-122.680  1.00  0.00           O  
ATOM   3341  CB  CYS C 121     -16.916  10.454-124.005  1.00  0.00           C  
ATOM   3342  SG  CYS C 121     -16.952   9.045-122.871  1.00  0.00           S  
ATOM   3343  N   GLY C 122     -20.264  10.634-123.120  1.00  0.00           N  
ATOM   3344  CA  GLY C 122     -21.172  11.060-122.074  1.00  0.00           C  
ATOM   3345  C   GLY C 122     -22.313  10.098-121.824  1.00  0.00           C  
ATOM   3346  O   GLY C 122     -22.174   8.903-122.017  1.00  0.00           O  
ATOM   3347  N   GLN C 123     -23.442  10.631-121.379  1.00  0.00           N  
ATOM   3348  CA  GLN C 123     -24.607   9.812-121.070  1.00  0.00           C  
ATOM   3349  C   GLN C 123     -25.191   9.259-122.357  1.00  0.00           C  
ATOM   3350  O   GLN C 123     -24.916   9.775-123.434  1.00  0.00           O  
ATOM   3351  CB  GLN C 123     -25.662  10.621-120.311  1.00  0.00           C  
ATOM   3352  CG  GLN C 123     -25.256  11.004-118.898  1.00  0.00           C  
ATOM   3353  CD  GLN C 123     -26.391  11.646-118.123  1.00  0.00           C  
ATOM   3354  NE2 GLN C 123     -26.504  11.299-116.846  1.00  0.00           N  
ATOM   3355  OE1 GLN C 123     -27.159  12.445-118.666  1.00  0.00           O  
ATOM   3356  N   PRO C 124     -26.032   8.216-122.250  1.00  0.00           N  
ATOM   3357  CA  PRO C 124     -26.621   7.473-123.370  1.00  0.00           C  
ATOM   3358  C   PRO C 124     -27.361   8.304-124.390  1.00  0.00           C  
ATOM   3359  O   PRO C 124     -28.163   9.161-124.035  1.00  0.00           O  
ATOM   3360  CB  PRO C 124     -27.585   6.521-122.654  1.00  0.00           C  
ATOM   3361  CG  PRO C 124     -26.924   6.246-121.347  1.00  0.00           C  
ATOM   3362  CD  PRO C 124     -26.322   7.566-120.946  1.00  0.00           C  
ATOM   3363  N   VAL C 125     -27.096   8.030-125.661  1.00  0.00           N  
ATOM   3364  CA  VAL C 125     -27.773   8.726-126.737  1.00  0.00           C  
ATOM   3365  C   VAL C 125     -28.224   7.728-127.809  1.00  0.00           C  
ATOM   3366  O   VAL C 125     -27.880   6.550-127.767  1.00  0.00           O  
ATOM   3367  CB  VAL C 125     -26.841   9.781-127.363  1.00  0.00           C  
ATOM   3368  CG1 VAL C 125     -26.394  10.787-126.312  1.00  0.00           C  
ATOM   3369  CG2 VAL C 125     -25.641   9.098-128.000  1.00  0.00           C  
ATOM   3370  N   THR C 126     -29.012   8.200-128.766  1.00  0.00           N  
ATOM   3371  CA  THR C 126     -29.415   7.368-129.893  1.00  0.00           C  
ATOM   3372  C   THR C 126     -29.351   8.238-131.128  1.00  0.00           C  
ATOM   3373  O   THR C 126     -29.602   9.426-131.031  1.00  0.00           O  
ATOM   3374  CB  THR C 126     -30.828   6.783-129.717  1.00  0.00           C  
ATOM   3375  CG2 THR C 126     -31.862   7.897-129.649  1.00  0.00           C  
ATOM   3376  OG1 THR C 126     -31.132   5.920-130.820  1.00  0.00           O  
ATOM   3377  N   ARG C 127     -29.015   7.683-132.286  1.00  0.00           N  
ATOM   3378  CA  ARG C 127     -28.906   8.547-133.449  1.00  0.00           C  
ATOM   3379  C   ARG C 127     -30.255   8.648-134.152  1.00  0.00           C  
ATOM   3380  O   ARG C 127     -30.971   7.662-134.311  1.00  0.00           O  
ATOM   3381  CB  ARG C 127     -27.858   8.021-134.418  1.00  0.00           C  
ATOM   3382  CG  ARG C 127     -27.603   8.907-135.627  1.00  0.00           C  
ATOM   3383  CD  ARG C 127     -26.423   8.450-136.404  1.00  0.00           C  
ATOM   3384  NE  ARG C 127     -25.190   8.583-135.645  1.00  0.00           N  
ATOM   3385  CZ  ARG C 127     -24.516   9.737-135.474  1.00  0.00           C  
ATOM   3386  NH1 ARG C 127     -24.968  10.847-136.014  1.00  0.00           N1+
ATOM   3387  NH2 ARG C 127     -23.402   9.754-134.764  1.00  0.00           N  
ATOM   3388  N   THR C 128     -30.601   9.862-134.556  1.00  0.00           N  
ATOM   3389  CA  THR C 128     -31.854  10.115-135.227  1.00  0.00           C  
ATOM   3390  C   THR C 128     -31.585  10.055-136.719  1.00  0.00           C  
ATOM   3391  O   THR C 128     -32.271   9.334-137.444  1.00  0.00           O  
ATOM   3392  CB  THR C 128     -32.456  11.478-134.836  1.00  0.00           C  
ATOM   3393  CG2 THR C 128     -33.751  11.726-135.595  1.00  0.00           C  
ATOM   3394  OG1 THR C 128     -32.720  11.500-133.427  1.00  0.00           O  
ATOM   3395  N   ASP C 129     -30.586  10.797-137.172  1.00  0.00           N  
ATOM   3396  CA  ASP C 129     -30.272  10.863-138.590  1.00  0.00           C  
ATOM   3397  C   ASP C 129     -28.751  11.041-138.744  1.00  0.00           C  
ATOM   3398  O   ASP C 129     -28.009  10.915-137.768  1.00  0.00           O  
ATOM   3399  CB  ASP C 129     -31.022  12.015-139.264  1.00  0.00           C  
ATOM   3400  CG  ASP C 129     -30.567  13.384-138.778  1.00  0.00           C  
ATOM   3401  OD1 ASP C 129     -29.385  13.573-138.617  1.00  0.00           O  
ATOM   3402  OD2 ASP C 129     -31.407  14.228-138.572  1.00  0.00           O1-
ATOM   3403  N   ASP C 130     -28.287  11.337-139.951  1.00  0.00           N  
ATOM   3404  CA  ASP C 130     -26.847  11.348-140.205  1.00  0.00           C  
ATOM   3405  C   ASP C 130     -26.041  12.349-139.394  1.00  0.00           C  
ATOM   3406  O   ASP C 130     -24.838  12.195-139.216  1.00  0.00           O  
ATOM   3407  CB  ASP C 130     -26.598  11.616-141.692  1.00  0.00           C  
ATOM   3408  CG  ASP C 130     -27.000  10.447-142.580  1.00  0.00           C  
ATOM   3409  OD1 ASP C 130     -27.241   9.385-142.058  1.00  0.00           O  
ATOM   3410  OD2 ASP C 130     -27.063  10.628-143.773  1.00  0.00           O1-
ATOM   3411  N   ASP C 131     -26.704  13.363-138.879  1.00  0.00           N  
ATOM   3412  CA  ASP C 131     -26.000  14.332-138.065  1.00  0.00           C  
ATOM   3413  C   ASP C 131     -26.826  14.776-136.862  1.00  0.00           C  
ATOM   3414  O   ASP C 131     -26.649  15.882-136.347  1.00  0.00           O  
ATOM   3415  CB  ASP C 131     -25.621  15.551-138.910  1.00  0.00           C  
ATOM   3416  CG  ASP C 131     -24.608  16.456-138.222  1.00  0.00           C  
ATOM   3417  OD1 ASP C 131     -23.729  15.943-137.571  1.00  0.00           O  
ATOM   3418  OD2 ASP C 131     -24.721  17.651-138.356  1.00  0.00           O1-
ATOM   3419  N   THR C 132     -27.709  13.900-136.400  1.00  0.00           N  
ATOM   3420  CA  THR C 132     -28.508  14.200-135.235  1.00  0.00           C  
ATOM   3421  C   THR C 132     -28.575  13.027-134.272  1.00  0.00           C  
ATOM   3422  O   THR C 132     -28.811  11.897-134.680  1.00  0.00           O  
ATOM   3423  CB  THR C 132     -29.934  14.613-135.643  1.00  0.00           C  
ATOM   3424  CG2 THR C 132     -30.753  14.986-134.417  1.00  0.00           C  
ATOM   3425  OG1 THR C 132     -29.873  15.735-136.533  1.00  0.00           O  
ATOM   3426  N   VAL C 133     -28.369  13.322-132.992  1.00  0.00           N  
ATOM   3427  CA  VAL C 133     -28.440  12.336-131.927  1.00  0.00           C  
ATOM   3428  C   VAL C 133     -29.410  12.881-130.886  1.00  0.00           C  
ATOM   3429  O   VAL C 133     -29.691  14.069-130.883  1.00  0.00           O  
ATOM   3430  CB  VAL C 133     -27.057  12.086-131.297  1.00  0.00           C  
ATOM   3431  CG1 VAL C 133     -26.087  11.548-132.338  1.00  0.00           C  
ATOM   3432  CG2 VAL C 133     -26.529  13.373-130.682  1.00  0.00           C  
ATOM   3433  N   ALA C 134     -29.918  12.030-130.006  1.00  0.00           N  
ATOM   3434  CA  ALA C 134     -30.866  12.478-128.982  1.00  0.00           C  
ATOM   3435  C   ALA C 134     -30.629  11.748-127.684  1.00  0.00           C  
ATOM   3436  O   ALA C 134     -30.045  10.663-127.668  1.00  0.00           O  
ATOM   3437  CB  ALA C 134     -32.301  12.279-129.446  1.00  0.00           C  
ATOM   3438  N   ASP C 135     -31.081  12.357-126.594  1.00  0.00           N  
ATOM   3439  CA  ASP C 135     -30.922  11.785-125.278  1.00  0.00           C  
ATOM   3440  C   ASP C 135     -31.733  10.521-125.119  1.00  0.00           C  
ATOM   3441  O   ASP C 135     -32.961  10.558-125.091  1.00  0.00           O  
ATOM   3442  CB  ASP C 135     -31.330  12.796-124.204  1.00  0.00           C  
ATOM   3443  CG  ASP C 135     -31.083  12.291-122.789  1.00  0.00           C  
ATOM   3444  OD1 ASP C 135     -30.795  11.127-122.636  1.00  0.00           O  
ATOM   3445  OD2 ASP C 135     -31.183  13.073-121.874  1.00  0.00           O1-
ATOM   3446  N   ALA C 136     -31.040   9.398-125.037  1.00  0.00           N  
ATOM   3447  CA  ALA C 136     -31.712   8.122-124.958  1.00  0.00           C  
ATOM   3448  C   ALA C 136     -32.025   8.006-123.475  1.00  0.00           C  
ATOM   3449  O   ALA C 136     -31.313   7.325-122.739  1.00  0.00           O  
ATOM   3450  CB  ALA C 136     -30.854   6.975-125.473  1.00  0.00           C  
ATOM   3451  N   LYS C 137     -33.069   8.712-123.037  1.00  0.00           N  
ATOM   3452  CA  LYS C 137     -33.497   8.692-121.634  1.00  0.00           C  
ATOM   3453  C   LYS C 137     -34.356   7.459-121.366  1.00  0.00           C  
ATOM   3454  O   LYS C 137     -35.399   7.260-121.998  1.00  0.00           O  
ATOM   3455  CB  LYS C 137     -34.269   9.964-121.281  1.00  0.00           C  
ATOM   3456  CG  LYS C 137     -34.681  10.064-119.818  1.00  0.00           C  
ATOM   3457  CD  LYS C 137     -35.393  11.378-119.534  1.00  0.00           C  
ATOM   3458  CE  LYS C 137     -35.819  11.473-118.076  1.00  0.00           C  
ATOM   3459  NZ  LYS C 137     -36.517  12.754-117.783  1.00  0.00           N1+
ATOM   3460  N   ASP C 138     -33.927   6.630-120.426  1.00  0.00           N  
ATOM   3461  CA  ASP C 138     -34.723   5.466-120.068  1.00  0.00           C  
ATOM   3462  C   ASP C 138     -34.515   5.037-118.619  1.00  0.00           C  
ATOM   3463  O   ASP C 138     -35.109   4.053-118.177  1.00  0.00           O  
ATOM   3464  CB  ASP C 138     -34.390   4.297-120.999  1.00  0.00           C  
ATOM   3465  CG  ASP C 138     -32.944   3.836-120.877  1.00  0.00           C  
ATOM   3466  OD1 ASP C 138     -32.284   4.251-119.953  1.00  0.00           O  
ATOM   3467  OD2 ASP C 138     -32.512   3.074-121.709  1.00  0.00           O1-
ATOM   3468  N   GLY C 139     -33.664   5.760-117.895  1.00  0.00           N  
ATOM   3469  CA  GLY C 139     -33.452   5.471-116.482  1.00  0.00           C  
ATOM   3470  C   GLY C 139     -32.176   4.751-116.074  1.00  0.00           C  
ATOM   3471  O   GLY C 139     -31.905   4.613-114.880  1.00  0.00           O  
ATOM   3472  N   LYS C 140     -31.382   4.295-117.036  1.00  0.00           N  
ATOM   3473  CA  LYS C 140     -30.133   3.615-116.712  1.00  0.00           C  
ATOM   3474  C   LYS C 140     -28.876   4.465-117.031  1.00  0.00           C  
ATOM   3475  O   LYS C 140     -27.788   3.934-117.263  1.00  0.00           O  
ATOM   3476  CB  LYS C 140     -30.068   2.283-117.460  1.00  0.00           C  
ATOM   3477  CG  LYS C 140     -31.189   1.312-117.115  1.00  0.00           C  
ATOM   3478  CD  LYS C 140     -31.115   0.877-115.658  1.00  0.00           C  
ATOM   3479  CE  LYS C 140     -32.191  -0.148-115.330  1.00  0.00           C  
ATOM   3480  NZ  LYS C 140     -32.162  -0.544-113.896  1.00  0.00           N1+
ATOM   3481  N   GLU C 141     -29.027   5.781-117.028  1.00  0.00           N  
ATOM   3482  CA  GLU C 141     -27.893   6.655-117.301  1.00  0.00           C  
ATOM   3483  C   GLU C 141     -26.932   6.722-116.128  1.00  0.00           C  
ATOM   3484  O   GLU C 141     -27.357   6.857-114.987  1.00  0.00           O  
ATOM   3485  CB  GLU C 141     -28.382   8.064-117.645  1.00  0.00           C  
ATOM   3486  CG  GLU C 141     -29.415   8.116-118.761  1.00  0.00           C  
ATOM   3487  CD  GLU C 141     -30.813   7.846-118.278  1.00  0.00           C  
ATOM   3488  OE1 GLU C 141     -31.058   8.010-117.107  1.00  0.00           O  
ATOM   3489  OE2 GLU C 141     -31.636   7.476-119.082  1.00  0.00           O1-
ATOM   3490  N   ILE C 142     -25.636   6.627-116.407  1.00  0.00           N  
ATOM   3491  CA  ILE C 142     -24.648   6.751-115.356  1.00  0.00           C  
ATOM   3492  C   ILE C 142     -24.636   8.228-114.967  1.00  0.00           C  
ATOM   3493  O   ILE C 142     -24.567   9.099-115.818  1.00  0.00           O  
ATOM   3494  CB  ILE C 142     -23.253   6.287-115.813  1.00  0.00           C  
ATOM   3495  CG1 ILE C 142     -23.263   4.788-116.121  1.00  0.00           C  
ATOM   3496  CG2 ILE C 142     -22.212   6.609-114.751  1.00  0.00           C  
ATOM   3497  CD1 ILE C 142     -22.009   4.298-116.809  1.00  0.00           C  
ATOM   3498  N   ASP C 143     -24.713   8.473-113.669  1.00  0.00           N  
ATOM   3499  CA  ASP C 143     -24.674   9.795-113.065  1.00  0.00           C  
ATOM   3500  C   ASP C 143     -23.352  10.514-113.226  1.00  0.00           C  
ATOM   3501  O   ASP C 143     -22.288   9.896-113.184  1.00  0.00           O  
ATOM   3502  CB  ASP C 143     -25.004   9.691-111.574  1.00  0.00           C  
ATOM   3503  CG  ASP C 143     -25.236  11.048-110.923  1.00  0.00           C  
ATOM   3504  OD1 ASP C 143     -26.371  11.454-110.830  1.00  0.00           O  
ATOM   3505  OD2 ASP C 143     -24.278  11.666-110.525  1.00  0.00           O1-
ATOM   3506  N   THR C 144     -23.409  11.826-113.390  1.00  0.00           N  
ATOM   3507  CA  THR C 144     -22.188  12.607-113.568  1.00  0.00           C  
ATOM   3508  C   THR C 144     -21.118  12.376-112.496  1.00  0.00           C  
ATOM   3509  O   THR C 144     -19.923  12.387-112.792  1.00  0.00           O  
ATOM   3510  CB  THR C 144     -22.527  14.108-113.617  1.00  0.00           C  
ATOM   3511  CG2 THR C 144     -21.260  14.937-113.766  1.00  0.00           C  
ATOM   3512  OG1 THR C 144     -23.397  14.369-114.727  1.00  0.00           O  
ATOM   3513  N   LYS C 145     -21.531  12.162-111.256  1.00  0.00           N  
ATOM   3514  CA  LYS C 145     -20.554  11.954-110.200  1.00  0.00           C  
ATOM   3515  C   LYS C 145     -19.673  10.731-110.402  1.00  0.00           C  
ATOM   3516  O   LYS C 145     -18.583  10.660-109.842  1.00  0.00           O  
ATOM   3517  CB  LYS C 145     -21.268  11.848-108.851  1.00  0.00           C  
ATOM   3518  CG  LYS C 145     -21.883  13.152-108.361  1.00  0.00           C  
ATOM   3519  CD  LYS C 145     -22.579  12.965-107.022  1.00  0.00           C  
ATOM   3520  CE  LYS C 145     -23.191  14.269-106.528  1.00  0.00           C  
ATOM   3521  NZ  LYS C 145     -23.907  14.093-105.236  1.00  0.00           N1+
ATOM   3522  N   HIS C 146     -20.123   9.781-111.215  1.00  0.00           N  
ATOM   3523  CA  HIS C 146     -19.314   8.602-111.511  1.00  0.00           C  
ATOM   3524  C   HIS C 146     -18.646   8.641-112.874  1.00  0.00           C  
ATOM   3525  O   HIS C 146     -18.057   7.651-113.320  1.00  0.00           O  
ATOM   3526  CB  HIS C 146     -20.175   7.338-111.416  1.00  0.00           C  
ATOM   3527  CG  HIS C 146     -20.728   7.088-110.047  1.00  0.00           C  
ATOM   3528  CD2 HIS C 146     -21.985   7.201-109.559  1.00  0.00           C  
ATOM   3529  ND1 HIS C 146     -19.944   6.664-108.994  1.00  0.00           N  
ATOM   3530  CE1 HIS C 146     -20.697   6.528-107.916  1.00  0.00           C  
ATOM   3531  NE2 HIS C 146     -21.938   6.848-108.233  1.00  0.00           N  
ATOM   3532  N   LEU C 147     -18.712   9.784-113.536  1.00  0.00           N  
ATOM   3533  CA  LEU C 147     -18.072   9.914-114.831  1.00  0.00           C  
ATOM   3534  C   LEU C 147     -16.746  10.658-114.801  1.00  0.00           C  
ATOM   3535  O   LEU C 147     -16.619  11.716-114.180  1.00  0.00           O  
ATOM   3536  CB  LEU C 147     -19.026  10.630-115.796  1.00  0.00           C  
ATOM   3537  CG  LEU C 147     -20.365   9.927-116.051  1.00  0.00           C  
ATOM   3538  CD1 LEU C 147     -21.233  10.798-116.950  1.00  0.00           C  
ATOM   3539  CD2 LEU C 147     -20.113   8.567-116.685  1.00  0.00           C  
ATOM   3540  N   PRO C 148     -15.731  10.101-115.473  1.00  0.00           N  
ATOM   3541  CA  PRO C 148     -14.431  10.746-115.654  1.00  0.00           C  
ATOM   3542  C   PRO C 148     -14.622  12.129-116.262  1.00  0.00           C  
ATOM   3543  O   PRO C 148     -15.660  12.433-116.846  1.00  0.00           O  
ATOM   3544  CB  PRO C 148     -13.696   9.800-116.609  1.00  0.00           C  
ATOM   3545  CG  PRO C 148     -14.334   8.474-116.374  1.00  0.00           C  
ATOM   3546  CD  PRO C 148     -15.789   8.793-116.153  1.00  0.00           C  
ATOM   3547  N   SER C 149     -13.601  12.959-116.138  1.00  0.00           N  
ATOM   3548  CA  SER C 149     -13.671  14.332-116.619  1.00  0.00           C  
ATOM   3549  C   SER C 149     -13.761  14.276-118.156  1.00  0.00           C  
ATOM   3550  O   SER C 149     -14.224  15.215-118.809  1.00  0.00           O  
ATOM   3551  CB  SER C 149     -12.458  15.125-116.174  1.00  0.00           C  
ATOM   3552  OG  SER C 149     -11.297  14.670-116.813  1.00  0.00           O  
ATOM   3553  N   THR C 150     -13.314  13.157-118.723  1.00  0.00           N  
ATOM   3554  CA  THR C 150     -13.385  12.948-120.156  1.00  0.00           C  
ATOM   3555  C   THR C 150     -14.751  12.477-120.602  1.00  0.00           C  
ATOM   3556  O   THR C 150     -14.984  12.348-121.795  1.00  0.00           O  
ATOM   3557  CB  THR C 150     -12.321  11.933-120.613  1.00  0.00           C  
ATOM   3558  CG2 THR C 150     -10.928  12.416-120.241  1.00  0.00           C  
ATOM   3559  OG1 THR C 150     -12.567  10.666-119.990  1.00  0.00           O  
ATOM   3560  N   CYS C 151     -15.653  12.193-119.668  1.00  0.00           N  
ATOM   3561  CA  CYS C 151     -16.974  11.718-120.069  1.00  0.00           C  
ATOM   3562  C   CYS C 151     -18.052  12.608-119.489  1.00  0.00           C  
ATOM   3563  O   CYS C 151     -18.835  12.193-118.642  1.00  0.00           O  
ATOM   3564  CB  CYS C 151     -17.203  10.279-119.606  1.00  0.00           C  
ATOM   3565  SG  CYS C 151     -18.787   9.578-120.128  1.00  0.00           S  
ATOM   3566  N   ARG C 152     -18.082  13.849-119.963  1.00  0.00           N  
ATOM   3567  CA  ARG C 152     -18.972  14.869-119.420  1.00  0.00           C  
ATOM   3568  C   ARG C 152     -19.700  15.575-120.552  1.00  0.00           C  
ATOM   3569  O   ARG C 152     -20.064  16.730-120.394  1.00  0.00           O  
ATOM   3570  CB  ARG C 152     -18.198  15.888-118.597  1.00  0.00           C  
ATOM   3571  CG  ARG C 152     -17.410  15.305-117.434  1.00  0.00           C  
ATOM   3572  CD  ARG C 152     -18.306  14.769-116.378  1.00  0.00           C  
ATOM   3573  NE  ARG C 152     -17.558  14.246-115.246  1.00  0.00           N  
ATOM   3574  CZ  ARG C 152     -17.109  14.989-114.216  1.00  0.00           C  
ATOM   3575  NH1 ARG C 152     -17.342  16.283-114.189  1.00  0.00           N1+
ATOM   3576  NH2 ARG C 152     -16.437  14.418-113.232  1.00  0.00           N  
ATOM   3577  N   ASP C 153     -19.912  14.908-121.684  1.00  0.00           N  
ATOM   3578  CA  ASP C 153     -20.568  15.554-122.825  1.00  0.00           C  
ATOM   3579  C   ASP C 153     -22.093  15.372-122.962  1.00  0.00           C  
ATOM   3580  O   ASP C 153     -22.654  14.353-122.574  1.00  0.00           O  
ATOM   3581  CB  ASP C 153     -19.906  15.057-124.112  1.00  0.00           C  
ATOM   3582  CG  ASP C 153     -18.456  15.503-124.244  1.00  0.00           C  
ATOM   3583  OD1 ASP C 153     -18.155  16.604-123.846  1.00  0.00           O  
ATOM   3584  OD2 ASP C 153     -17.663  14.738-124.740  1.00  0.00           O1-
ATOM   3585  N   ASN C 154     -22.739  16.377-123.538  1.00  0.00           N  
ATOM   3586  CA  ASN C 154     -24.180  16.366-123.805  1.00  0.00           C  
ATOM   3587  C   ASN C 154     -24.468  16.069-125.281  1.00  0.00           C  
ATOM   3588  O   ASN C 154     -23.706  16.443-126.173  1.00  0.00           O  
ATOM   3589  CB  ASN C 154     -24.809  17.685-123.393  1.00  0.00           C  
ATOM   3590  CG  ASN C 154     -24.754  17.912-121.908  1.00  0.00           C  
ATOM   3591  ND2 ASN C 154     -24.458  19.124-121.513  1.00  0.00           N  
ATOM   3592  OD1 ASN C 154     -24.981  16.988-121.118  1.00  0.00           O  
ATOM   3593  N   PHE C 155     -25.583  15.395-125.525  1.00  0.00           N  
ATOM   3594  CA  PHE C 155     -25.949  14.985-126.865  1.00  0.00           C  
ATOM   3595  C   PHE C 155     -26.079  16.170-127.834  1.00  0.00           C  
ATOM   3596  O   PHE C 155     -25.899  16.016-129.048  1.00  0.00           O  
ATOM   3597  CB  PHE C 155     -27.266  14.208-126.823  1.00  0.00           C  
ATOM   3598  CG  PHE C 155     -28.482  15.082-126.697  1.00  0.00           C  
ATOM   3599  CD1 PHE C 155     -29.159  15.520-127.825  1.00  0.00           C  
ATOM   3600  CD2 PHE C 155     -28.950  15.469-125.450  1.00  0.00           C  
ATOM   3601  CE1 PHE C 155     -30.277  16.324-127.710  1.00  0.00           C  
ATOM   3602  CE2 PHE C 155     -30.068  16.271-125.332  1.00  0.00           C  
ATOM   3603  CZ  PHE C 155     -30.732  16.700-126.464  1.00  0.00           C  
ATOM   3604  N   ASP C 156     -26.386  17.359-127.317  1.00  0.00           N  
ATOM   3605  CA  ASP C 156     -26.494  18.523-128.201  1.00  0.00           C  
ATOM   3606  C   ASP C 156     -25.206  19.321-128.404  1.00  0.00           C  
ATOM   3607  O   ASP C 156     -25.235  20.429-128.938  1.00  0.00           O  
ATOM   3608  CB  ASP C 156     -27.572  19.467-127.663  1.00  0.00           C  
ATOM   3609  CG  ASP C 156     -27.232  20.036-126.292  1.00  0.00           C  
ATOM   3610  OD1 ASP C 156     -26.220  19.660-125.749  1.00  0.00           O  
ATOM   3611  OD2 ASP C 156     -27.986  20.841-125.802  1.00  0.00           O1-
ATOM   3612  N   ALA C 157     -24.081  18.766-127.977  1.00  0.00           N  
ATOM   3613  CA  ALA C 157     -22.811  19.442-128.166  1.00  0.00           C  
ATOM   3614  C   ALA C 157     -22.449  19.369-129.644  1.00  0.00           C  
ATOM   3615  O   ALA C 157     -22.812  18.419-130.330  1.00  0.00           O  
ATOM   3616  CB  ALA C 157     -21.727  18.822-127.297  1.00  0.00           C  
ATOM   3617  N   LYS C 158     -21.749  20.376-130.151  1.00  0.00           N  
ATOM   3618  CA  LYS C 158     -21.409  20.370-131.566  1.00  0.00           C  
ATOM   3619  C   LYS C 158     -19.924  20.639-131.693  1.00  0.00           C  
ATOM   3620  O   LYS C 158     -19.355  21.159-130.712  1.00  0.00           O  
ATOM   3621  CB  LYS C 158     -22.218  21.412-132.341  1.00  0.00           C  
ATOM   3622  CG  LYS C 158     -21.943  21.436-133.838  1.00  0.00           C  
ATOM   3623  CD  LYS C 158     -22.802  22.476-134.541  1.00  0.00           C  
ATOM   3624  CE  LYS C 158     -22.508  22.522-136.033  1.00  0.00           C  
ATOM   3625  NZ  LYS C 158     -23.326  23.551-136.731  1.00  0.00           N1+
ATOM   3626  OXT LYS C 158     -19.346  20.354-132.705  1.00  0.00           O1-
TER    3627      LYS C 158 
ATOM   3628  N   PHE D   1       0.168  -9.390 -53.892  1.00  0.00           N  
ATOM   3629  CA  PHE D   1      -0.059  -8.264 -52.936  1.00  0.00           C  
ATOM   3630  C   PHE D   1      -0.354  -6.933 -53.634  1.00  0.00           C  
ATOM   3631  O   PHE D   1      -1.133  -6.127 -53.122  1.00  0.00           O  
ATOM   3632  CB  PHE D   1       1.159  -8.084 -52.027  1.00  0.00           C  
ATOM   3633  CG  PHE D   1       1.415  -9.253 -51.118  1.00  0.00           C  
ATOM   3634  CD1 PHE D   1       0.563 -10.347 -51.116  1.00  0.00           C  
ATOM   3635  CD2 PHE D   1       2.506  -9.259 -50.264  1.00  0.00           C  
ATOM   3636  CE1 PHE D   1       0.798 -11.423 -50.280  1.00  0.00           C  
ATOM   3637  CE2 PHE D   1       2.744 -10.333 -49.428  1.00  0.00           C  
ATOM   3638  CZ  PHE D   1       1.888 -11.416 -49.437  1.00  0.00           C  
ATOM   3639  N   THR D   2       0.248  -6.713 -54.809  1.00  0.00           N  
ATOM   3640  CA  THR D   2       0.025  -5.474 -55.570  1.00  0.00           C  
ATOM   3641  C   THR D   2       0.257  -5.522 -57.089  1.00  0.00           C  
ATOM   3642  O   THR D   2      -0.683  -5.395 -57.879  1.00  0.00           O  
ATOM   3643  CB  THR D   2       0.909  -4.355 -54.988  1.00  0.00           C  
ATOM   3644  CG2 THR D   2       0.728  -3.068 -55.778  1.00  0.00           C  
ATOM   3645  OG1 THR D   2       0.554  -4.126 -53.619  1.00  0.00           O  
ATOM   3646  N   LEU D   3       1.523  -5.697 -57.471  1.00  0.00           N  
ATOM   3647  CA  LEU D   3       1.956  -5.676 -58.872  1.00  0.00           C  
ATOM   3648  C   LEU D   3       1.513  -6.878 -59.711  1.00  0.00           C  
ATOM   3649  O   LEU D   3       2.331  -7.739 -60.058  1.00  0.00           O  
ATOM   3650  CB  LEU D   3       3.486  -5.578 -58.921  1.00  0.00           C  
ATOM   3651  CG  LEU D   3       4.103  -5.504 -60.324  1.00  0.00           C  
ATOM   3652  CD1 LEU D   3       3.644  -4.227 -61.015  1.00  0.00           C  
ATOM   3653  CD2 LEU D   3       5.620  -5.551 -60.214  1.00  0.00           C  
ATOM   3654  N   ILE D   4       0.225  -6.930 -60.046  1.00  0.00           N  
ATOM   3655  CA  ILE D   4      -0.283  -7.966 -60.946  1.00  0.00           C  
ATOM   3656  C   ILE D   4      -0.967  -7.390 -62.197  1.00  0.00           C  
ATOM   3657  O   ILE D   4      -1.108  -8.082 -63.207  1.00  0.00           O  
ATOM   3658  CB  ILE D   4      -1.273  -8.881 -60.202  1.00  0.00           C  
ATOM   3659  CG1 ILE D   4      -2.488  -8.079 -59.729  1.00  0.00           C  
ATOM   3660  CG2 ILE D   4      -0.589  -9.561 -59.026  1.00  0.00           C  
ATOM   3661  CD1 ILE D   4      -3.615  -8.934 -59.196  1.00  0.00           C  
ATOM   3662  N   GLU D   5      -1.370  -6.122 -62.122  1.00  0.00           N  
ATOM   3663  CA  GLU D   5      -2.070  -5.453 -63.216  1.00  0.00           C  
ATOM   3664  C   GLU D   5      -1.137  -5.221 -64.406  1.00  0.00           C  
ATOM   3665  O   GLU D   5      -1.535  -5.394 -65.556  1.00  0.00           O  
ATOM   3666  CB  GLU D   5      -2.651  -4.120 -62.741  1.00  0.00           C  
ATOM   3667  CG  GLU D   5      -3.804  -4.252 -61.756  1.00  0.00           C  
ATOM   3668  CD  GLU D   5      -4.318  -2.923 -61.276  1.00  0.00           C  
ATOM   3669  OE1 GLU D   5      -3.697  -1.928 -61.562  1.00  0.00           O  
ATOM   3670  OE2 GLU D   5      -5.334  -2.903 -60.621  1.00  0.00           O1-
ATOM   3671  N   LEU D   6       0.104  -4.830 -64.118  1.00  0.00           N  
ATOM   3672  CA  LEU D   6       1.131  -4.666 -65.144  1.00  0.00           C  
ATOM   3673  C   LEU D   6       1.342  -5.963 -65.921  1.00  0.00           C  
ATOM   3674  O   LEU D   6       1.362  -5.959 -67.152  1.00  0.00           O  
ATOM   3675  CB  LEU D   6       2.453  -4.222 -64.507  1.00  0.00           C  
ATOM   3676  CG  LEU D   6       3.625  -4.020 -65.476  1.00  0.00           C  
ATOM   3677  CD1 LEU D   6       3.285  -2.906 -66.458  1.00  0.00           C  
ATOM   3678  CD2 LEU D   6       4.884  -3.690 -64.690  1.00  0.00           C  
ATOM   3679  N   MET D   7       1.490  -7.068 -65.189  1.00  0.00           N  
ATOM   3680  CA  MET D   7       1.597  -8.401 -65.779  1.00  0.00           C  
ATOM   3681  C   MET D   7       0.416  -8.751 -66.690  1.00  0.00           C  
ATOM   3682  O   MET D   7       0.617  -9.200 -67.817  1.00  0.00           O  
ATOM   3683  CB  MET D   7       1.728  -9.443 -64.670  1.00  0.00           C  
ATOM   3684  CG  MET D   7       1.758 -10.884 -65.160  1.00  0.00           C  
ATOM   3685  SD  MET D   7       1.732 -12.079 -63.808  1.00  0.00           S  
ATOM   3686  CE  MET D   7       0.072 -11.843 -63.180  1.00  0.00           C  
ATOM   3687  N   ILE D   8      -0.806  -8.554 -66.196  1.00  0.00           N  
ATOM   3688  CA  ILE D   8      -2.002  -8.864 -66.982  1.00  0.00           C  
ATOM   3689  C   ILE D   8      -2.051  -8.057 -68.281  1.00  0.00           C  
ATOM   3690  O   ILE D   8      -2.261  -8.624 -69.355  1.00  0.00           O  
ATOM   3691  CB  ILE D   8      -3.278  -8.593 -66.163  1.00  0.00           C  
ATOM   3692  CG1 ILE D   8      -3.392  -9.588 -65.005  1.00  0.00           C  
ATOM   3693  CG2 ILE D   8      -4.508  -8.666 -67.055  1.00  0.00           C  
ATOM   3694  CD1 ILE D   8      -4.432  -9.210 -63.976  1.00  0.00           C  
ATOM   3695  N   VAL D   9      -1.830  -6.744 -68.188  1.00  0.00           N  
ATOM   3696  CA  VAL D   9      -1.801  -5.876 -69.370  1.00  0.00           C  
ATOM   3697  C   VAL D   9      -0.713  -6.272 -70.390  1.00  0.00           C  
ATOM   3698  O   VAL D   9      -0.990  -6.349 -71.588  1.00  0.00           O  
ATOM   3699  CB  VAL D   9      -1.572  -4.417 -68.933  1.00  0.00           C  
ATOM   3700  CG1 VAL D   9      -1.284  -3.538 -70.141  1.00  0.00           C  
ATOM   3701  CG2 VAL D   9      -2.787  -3.908 -68.173  1.00  0.00           C  
ATOM   3702  N   ILE D  10       0.505  -6.538 -69.922  1.00  0.00           N  
ATOM   3703  CA  ILE D  10       1.580  -6.956 -70.828  1.00  0.00           C  
ATOM   3704  C   ILE D  10       1.207  -8.265 -71.539  1.00  0.00           C  
ATOM   3705  O   ILE D  10       1.409  -8.404 -72.749  1.00  0.00           O  
ATOM   3706  CB  ILE D  10       2.906  -7.139 -70.067  1.00  0.00           C  
ATOM   3707  CG1 ILE D  10       3.438  -5.785 -69.590  1.00  0.00           C  
ATOM   3708  CG2 ILE D  10       3.932  -7.838 -70.946  1.00  0.00           C  
ATOM   3709  CD1 ILE D  10       4.579  -5.891 -68.604  1.00  0.00           C  
ATOM   3710  N   ALA D  11       0.646  -9.203 -70.778  1.00  0.00           N  
ATOM   3711  CA  ALA D  11       0.187 -10.483 -71.311  1.00  0.00           C  
ATOM   3712  C   ALA D  11      -0.916 -10.339 -72.364  1.00  0.00           C  
ATOM   3713  O   ALA D  11      -0.917 -11.064 -73.361  1.00  0.00           O  
ATOM   3714  CB  ALA D  11      -0.293 -11.370 -70.171  1.00  0.00           C  
ATOM   3715  N   ILE D  12      -1.856  -9.421 -72.139  1.00  0.00           N  
ATOM   3716  CA  ILE D  12      -2.931  -9.181 -73.108  1.00  0.00           C  
ATOM   3717  C   ILE D  12      -2.380  -8.624 -74.420  1.00  0.00           C  
ATOM   3718  O   ILE D  12      -2.785  -9.062 -75.497  1.00  0.00           O  
ATOM   3719  CB  ILE D  12      -3.978  -8.207 -72.537  1.00  0.00           C  
ATOM   3720  CG1 ILE D  12      -4.749  -8.863 -71.389  1.00  0.00           C  
ATOM   3721  CG2 ILE D  12      -4.931  -7.751 -73.631  1.00  0.00           C  
ATOM   3722  CD1 ILE D  12      -5.591  -7.897 -70.588  1.00  0.00           C  
ATOM   3723  N   VAL D  13      -1.469  -7.658 -74.322  1.00  0.00           N  
ATOM   3724  CA  VAL D  13      -0.807  -7.080 -75.493  1.00  0.00           C  
ATOM   3725  C   VAL D  13       0.024  -8.160 -76.192  1.00  0.00           C  
ATOM   3726  O   VAL D  13       0.015  -8.267 -77.422  1.00  0.00           O  
ATOM   3727  CB  VAL D  13       0.100  -5.905 -75.082  1.00  0.00           C  
ATOM   3728  CG1 VAL D  13       0.939  -5.442 -76.264  1.00  0.00           C  
ATOM   3729  CG2 VAL D  13      -0.745  -4.763 -74.540  1.00  0.00           C  
ATOM   3730  N   GLY D  14       0.729  -8.961 -75.393  1.00  0.00           N  
ATOM   3731  CA  GLY D  14       1.508 -10.081 -75.893  1.00  0.00           C  
ATOM   3732  C   GLY D  14       0.688 -11.008 -76.773  1.00  0.00           C  
ATOM   3733  O   GLY D  14       1.004 -11.185 -77.954  1.00  0.00           O  
ATOM   3734  N   ILE D  15      -0.366 -11.594 -76.206  1.00  0.00           N  
ATOM   3735  CA  ILE D  15      -1.200 -12.554 -76.934  1.00  0.00           C  
ATOM   3736  C   ILE D  15      -1.928 -11.910 -78.116  1.00  0.00           C  
ATOM   3737  O   ILE D  15      -2.210 -12.579 -79.110  1.00  0.00           O  
ATOM   3738  CB  ILE D  15      -2.233 -13.198 -75.991  1.00  0.00           C  
ATOM   3739  CG1 ILE D  15      -2.877 -14.417 -76.658  1.00  0.00           C  
ATOM   3740  CG2 ILE D  15      -3.293 -12.183 -75.591  1.00  0.00           C  
ATOM   3741  CD1 ILE D  15      -1.912 -15.550 -76.921  1.00  0.00           C  
ATOM   3742  N   LEU D  16      -2.227 -10.616 -77.998  1.00  0.00           N  
ATOM   3743  CA  LEU D  16      -2.836  -9.851 -79.089  1.00  0.00           C  
ATOM   3744  C   LEU D  16      -1.940  -9.883 -80.324  1.00  0.00           C  
ATOM   3745  O   LEU D  16      -2.407 -10.173 -81.426  1.00  0.00           O  
ATOM   3746  CB  LEU D  16      -3.078  -8.398 -78.659  1.00  0.00           C  
ATOM   3747  CG  LEU D  16      -3.664  -7.474 -79.734  1.00  0.00           C  
ATOM   3748  CD1 LEU D  16      -5.037  -7.984 -80.149  1.00  0.00           C  
ATOM   3749  CD2 LEU D  16      -3.747  -6.055 -79.193  1.00  0.00           C  
ATOM   3750  N   ALA D  17      -0.657  -9.584 -80.122  1.00  0.00           N  
ATOM   3751  CA  ALA D  17       0.345  -9.656 -81.184  1.00  0.00           C  
ATOM   3752  C   ALA D  17       0.504 -11.085 -81.700  1.00  0.00           C  
ATOM   3753  O   ALA D  17       0.656 -11.298 -82.902  1.00  0.00           O  
ATOM   3754  CB  ALA D  17       1.679  -9.116 -80.688  1.00  0.00           C  
ATOM   3755  N   ALA D  18       0.461 -12.049 -80.781  1.00  0.00           N  
ATOM   3756  CA  ALA D  18       0.554 -13.471 -81.119  1.00  0.00           C  
ATOM   3757  C   ALA D  18      -0.606 -13.929 -82.006  1.00  0.00           C  
ATOM   3758  O   ALA D  18      -0.459 -14.878 -82.780  1.00  0.00           O  
ATOM   3759  CB  ALA D  18       0.610 -14.308 -79.850  1.00  0.00           C  
ATOM   3760  N   VAL D  19      -1.749 -13.260 -81.879  1.00  0.00           N  
ATOM   3761  CA  VAL D  19      -2.886 -13.470 -82.779  1.00  0.00           C  
ATOM   3762  C   VAL D  19      -2.640 -12.768 -84.118  1.00  0.00           C  
ATOM   3763  O   VAL D  19      -2.803 -13.372 -85.182  1.00  0.00           O  
ATOM   3764  CB  VAL D  19      -4.183 -12.934 -82.145  1.00  0.00           C  
ATOM   3765  CG1 VAL D  19      -5.308 -12.914 -83.169  1.00  0.00           C  
ATOM   3766  CG2 VAL D  19      -4.563 -13.786 -80.943  1.00  0.00           C  
ATOM   3767  N   ALA D  20      -2.238 -11.501 -84.059  1.00  0.00           N  
ATOM   3768  CA  ALA D  20      -2.121 -10.663 -85.253  1.00  0.00           C  
ATOM   3769  C   ALA D  20      -1.172 -11.265 -86.295  1.00  0.00           C  
ATOM   3770  O   ALA D  20      -1.513 -11.345 -87.479  1.00  0.00           O  
ATOM   3771  CB  ALA D  20      -1.661  -9.265 -84.865  1.00  0.00           C  
ATOM   3772  N   LEU D  21       0.008 -11.690 -85.844  1.00  0.00           N  
ATOM   3773  CA  LEU D  21       1.077 -12.135 -86.738  1.00  0.00           C  
ATOM   3774  C   LEU D  21       0.682 -13.334 -87.621  1.00  0.00           C  
ATOM   3775  O   LEU D  21       0.819 -13.245 -88.842  1.00  0.00           O  
ATOM   3776  CB  LEU D  21       2.313 -12.503 -85.908  1.00  0.00           C  
ATOM   3777  CG  LEU D  21       3.079 -11.322 -85.296  1.00  0.00           C  
ATOM   3778  CD1 LEU D  21       4.126 -11.845 -84.322  1.00  0.00           C  
ATOM   3779  CD2 LEU D  21       3.724 -10.506 -86.406  1.00  0.00           C  
ATOM   3780  N   PRO D  22       0.193 -14.437 -87.037  1.00  0.00           N  
ATOM   3781  CA  PRO D  22      -0.230 -15.596 -87.836  1.00  0.00           C  
ATOM   3782  C   PRO D  22      -1.490 -15.349 -88.669  1.00  0.00           C  
ATOM   3783  O   PRO D  22      -1.681 -16.036 -89.671  1.00  0.00           O  
ATOM   3784  CB  PRO D  22      -0.480 -16.661 -86.763  1.00  0.00           C  
ATOM   3785  CG  PRO D  22      -0.834 -15.876 -85.545  1.00  0.00           C  
ATOM   3786  CD  PRO D  22       0.071 -14.675 -85.598  1.00  0.00           C  
ATOM   3787  N   ALA D  23      -2.322 -14.395 -88.257  1.00  0.00           N  
ATOM   3788  CA  ALA D  23      -3.451 -13.937 -89.067  1.00  0.00           C  
ATOM   3789  C   ALA D  23      -2.973 -13.285 -90.364  1.00  0.00           C  
ATOM   3790  O   ALA D  23      -3.541 -13.525 -91.430  1.00  0.00           O  
ATOM   3791  CB  ALA D  23      -4.317 -12.971 -88.272  1.00  0.00           C  
ATOM   3792  N   TYR D  24      -1.924 -12.468 -90.257  1.00  0.00           N  
ATOM   3793  CA  TYR D  24      -1.282 -11.840 -91.410  1.00  0.00           C  
ATOM   3794  C   TYR D  24      -0.609 -12.892 -92.295  1.00  0.00           C  
ATOM   3795  O   TYR D  24      -0.569 -12.746 -93.518  1.00  0.00           O  
ATOM   3796  CB  TYR D  24      -0.262 -10.794 -90.953  1.00  0.00           C  
ATOM   3797  CG  TYR D  24      -0.888  -9.520 -90.429  1.00  0.00           C  
ATOM   3798  CD1 TYR D  24      -0.553  -9.053 -89.166  1.00  0.00           C  
ATOM   3799  CD2 TYR D  24      -1.795  -8.820 -91.210  1.00  0.00           C  
ATOM   3800  CE1 TYR D  24      -1.125  -7.890 -88.687  1.00  0.00           C  
ATOM   3801  CE2 TYR D  24      -2.366  -7.657 -90.731  1.00  0.00           C  
ATOM   3802  CZ  TYR D  24      -2.034  -7.192 -89.475  1.00  0.00           C  
ATOM   3803  OH  TYR D  24      -2.603  -6.034 -88.997  1.00  0.00           O  
ATOM   3804  N   GLN D  25      -0.085 -13.945 -91.667  1.00  0.00           N  
ATOM   3805  CA  GLN D  25       0.492 -15.082 -92.387  1.00  0.00           C  
ATOM   3806  C   GLN D  25      -0.560 -15.904 -93.128  1.00  0.00           C  
ATOM   3807  O   GLN D  25      -0.288 -16.431 -94.208  1.00  0.00           O  
ATOM   3808  CB  GLN D  25       1.259 -15.986 -91.417  1.00  0.00           C  
ATOM   3809  CG  GLN D  25       2.515 -15.356 -90.840  1.00  0.00           C  
ATOM   3810  CD  GLN D  25       3.557 -15.064 -91.903  1.00  0.00           C  
ATOM   3811  NE2 GLN D  25       4.169 -13.888 -91.823  1.00  0.00           N  
ATOM   3812  OE1 GLN D  25       3.810 -15.888 -92.787  1.00  0.00           O  
ATOM   3813  N   ASP D  26      -1.750 -16.023 -92.544  1.00  0.00           N  
ATOM   3814  CA  ASP D  26      -2.683 -16.922 -93.735  1.00  0.00           C  
ATOM   3815  C   ASP D  26      -2.944 -15.983 -94.892  1.00  0.00           C  
ATOM   3816  O   ASP D  26      -3.030 -16.420 -96.034  1.00  0.00           O  
ATOM   3817  CB  ASP D  26      -4.050 -17.422 -93.261  1.00  0.00           C  
ATOM   3818  CG  ASP D  26      -3.948 -18.566 -92.261  1.00  0.00           C  
ATOM   3819  OD1 ASP D  26      -2.862 -19.056 -92.058  1.00  0.00           O  
ATOM   3820  OD2 ASP D  26      -4.956 -18.939 -91.711  1.00  0.00           O1-
ATOM   3821  N   TYR D  27      -3.062 -14.695 -94.601  1.00  0.00           N  
ATOM   3822  CA  TYR D  27      -3.354 -13.740 -95.651  1.00  0.00           C  
ATOM   3823  C   TYR D  27      -2.181 -13.862 -96.597  1.00  0.00           C  
ATOM   3824  O   TYR D  27      -2.335 -14.068 -97.799  1.00  0.00           O  
ATOM   3825  CB  TYR D  27      -3.517 -12.315 -95.119  1.00  0.00           C  
ATOM   3826  CG  TYR D  27      -3.689 -11.274 -96.203  1.00  0.00           C  
ATOM   3827  CD1 TYR D  27      -4.924 -11.103 -96.811  1.00  0.00           C  
ATOM   3828  CD2 TYR D  27      -2.611 -10.491 -96.589  1.00  0.00           C  
ATOM   3829  CE1 TYR D  27      -5.081 -10.152 -97.801  1.00  0.00           C  
ATOM   3830  CE2 TYR D  27      -2.768  -9.540 -97.579  1.00  0.00           C  
ATOM   3831  CZ  TYR D  27      -3.997  -9.370 -98.184  1.00  0.00           C  
ATOM   3832  OH  TYR D  27      -4.153  -8.423 -99.170  1.00  0.00           O  
ATOM   3833  N   THR D  28      -0.999 -13.748 -96.018  1.00  0.00           N  
ATOM   3834  CA  THR D  28       0.230 -13.744 -96.775  1.00  0.00           C  
ATOM   3835  C   THR D  28       0.358 -14.955 -97.695  1.00  0.00           C  
ATOM   3836  O   THR D  28       0.765 -14.824 -98.851  1.00  0.00           O  
ATOM   3837  CB  THR D  28       1.444 -13.686 -95.829  1.00  0.00           C  
ATOM   3838  CG2 THR D  28       2.741 -13.755 -96.620  1.00  0.00           C  
ATOM   3839  OG1 THR D  28       1.410 -12.465 -95.078  1.00  0.00           O  
ATOM   3840  N   ALA D  29       0.010 -16.131 -97.193  1.00  0.00           N  
ATOM   3841  CA  ALA D  29       0.091 -17.358 -97.988  1.00  0.00           C  
ATOM   3842  C   ALA D  29      -0.617 -17.188 -99.317  1.00  0.00           C  
ATOM   3843  O   ALA D  29      -0.071 -17.496-100.375  1.00  0.00           O  
ATOM   3844  CB  ALA D  29      -0.493 -18.534 -97.220  1.00  0.00           C  
ATOM   3845  N   ARG D  30      -1.846 -16.697 -99.238  1.00  0.00           N  
ATOM   3846  CA  ARG D  30      -2.684 -16.471-100.396  1.00  0.00           C  
ATOM   3847  C   ARG D  30      -2.064 -15.385-101.244  1.00  0.00           C  
ATOM   3848  O   ARG D  30      -2.054 -15.480-102.465  1.00  0.00           O  
ATOM   3849  CB  ARG D  30      -4.093 -16.068 -99.987  1.00  0.00           C  
ATOM   3850  CG  ARG D  30      -5.076 -15.923-101.138  1.00  0.00           C  
ATOM   3851  CD  ARG D  30      -6.453 -15.646-100.652  1.00  0.00           C  
ATOM   3852  NE  ARG D  30      -6.960 -16.723 -99.818  1.00  0.00           N  
ATOM   3853  CZ  ARG D  30      -7.854 -16.564 -98.822  1.00  0.00           C  
ATOM   3854  NH1 ARG D  30      -8.328 -15.368 -98.550  1.00  0.00           N1+
ATOM   3855  NH2 ARG D  30      -8.254 -17.609 -98.120  1.00  0.00           N  
ATOM   3856  N   ALA D  31      -1.544 -14.353-100.587  1.00  0.00           N  
ATOM   3857  CA  ALA D  31      -0.916 -13.229-101.286  1.00  0.00           C  
ATOM   3858  C   ALA D  31       0.272 -13.700-102.130  1.00  0.00           C  
ATOM   3859  O   ALA D  31       0.488 -13.221-103.242  1.00  0.00           O  
ATOM   3860  CB  ALA D  31      -0.476 -12.164-100.292  1.00  0.00           C  
ATOM   3861  N   GLN D  32       1.023 -14.653-101.583  1.00  0.00           N  
ATOM   3862  CA  GLN D  32       2.145 -15.282-102.274  1.00  0.00           C  
ATOM   3863  C   GLN D  32       1.681 -16.007-103.538  1.00  0.00           C  
ATOM   3864  O   GLN D  32       2.341 -15.957-104.576  1.00  0.00           O  
ATOM   3865  CB  GLN D  32       2.865 -16.261-101.342  1.00  0.00           C  
ATOM   3866  CG  GLN D  32       3.612 -15.597-100.198  1.00  0.00           C  
ATOM   3867  CD  GLN D  32       4.288 -16.604 -99.287  1.00  0.00           C  
ATOM   3868  NE2 GLN D  32       5.323 -16.160 -98.582  1.00  0.00           N  
ATOM   3869  OE1 GLN D  32       3.885 -17.768 -99.217  1.00  0.00           O  
ATOM   3870  N   VAL D  33       0.557 -16.703-103.439  1.00  0.00           N  
ATOM   3871  CA  VAL D  33      -0.004 -17.394-104.583  1.00  0.00           C  
ATOM   3872  C   VAL D  33      -0.403 -16.361-105.621  1.00  0.00           C  
ATOM   3873  O   VAL D  33      -0.155 -16.536-106.814  1.00  0.00           O  
ATOM   3874  CB  VAL D  33      -1.229 -18.233-104.175  1.00  0.00           C  
ATOM   3875  CG1 VAL D  33      -1.929 -18.788-105.406  1.00  0.00           C  
ATOM   3876  CG2 VAL D  33      -0.799 -19.358-103.246  1.00  0.00           C  
ATOM   3877  N   SER D  34      -1.019 -15.279-105.160  1.00  0.00           N  
ATOM   3878  CA  SER D  34      -1.558 -14.281-106.068  1.00  0.00           C  
ATOM   3879  C   SER D  34      -0.456 -13.634-106.887  1.00  0.00           C  
ATOM   3880  O   SER D  34      -0.683 -13.198-108.020  1.00  0.00           O  
ATOM   3881  CB  SER D  34      -2.311 -13.219-105.290  1.00  0.00           C  
ATOM   3882  OG  SER D  34      -1.428 -12.403-104.570  1.00  0.00           O  
ATOM   3883  N   GLU D  35       0.736 -13.568-106.313  1.00  0.00           N  
ATOM   3884  CA  GLU D  35       1.893 -13.118-107.064  1.00  0.00           C  
ATOM   3885  C   GLU D  35       2.179 -14.035-108.218  1.00  0.00           C  
ATOM   3886  O   GLU D  35       2.439 -13.580-109.329  1.00  0.00           O  
ATOM   3887  CB  GLU D  35       3.124 -13.032-106.158  1.00  0.00           C  
ATOM   3888  CG  GLU D  35       4.370 -12.486-106.842  1.00  0.00           C  
ATOM   3889  CD  GLU D  35       5.568 -12.452-105.933  1.00  0.00           C  
ATOM   3890  OE1 GLU D  35       5.708 -13.344-105.132  1.00  0.00           O  
ATOM   3891  OE2 GLU D  35       6.343 -11.532-106.041  1.00  0.00           O1-
ATOM   3892  N   ALA D  36       2.140 -15.332-107.955  1.00  0.00           N  
ATOM   3893  CA  ALA D  36       2.484 -16.293-108.980  1.00  0.00           C  
ATOM   3894  C   ALA D  36       1.474 -16.040-110.087  1.00  0.00           C  
ATOM   3895  O   ALA D  36       1.813 -15.986-111.272  1.00  0.00           O  
ATOM   3896  CB  ALA D  36       2.436 -17.725-108.466  1.00  0.00           C  
ATOM   3897  N   ILE D  37       0.224 -15.853-109.681  1.00  0.00           N  
ATOM   3898  CA  ILE D  37      -0.859 -15.668-110.622  1.00  0.00           C  
ATOM   3899  C   ILE D  37      -0.657 -14.421-111.472  1.00  0.00           C  
ATOM   3900  O   ILE D  37      -0.772 -14.476-112.699  1.00  0.00           O  
ATOM   3901  CB  ILE D  37      -2.207 -15.575-109.884  1.00  0.00           C  
ATOM   3902  CG1 ILE D  37      -2.566 -16.925-109.257  1.00  0.00           C  
ATOM   3903  CG2 ILE D  37      -3.303 -15.117-110.834  1.00  0.00           C  
ATOM   3904  CD1 ILE D  37      -3.732 -16.861-108.297  1.00  0.00           C  
ATOM   3905  N   LEU D  38      -0.349 -13.300-110.837  1.00  0.00           N  
ATOM   3906  CA  LEU D  38      -0.277 -12.042-111.572  1.00  0.00           C  
ATOM   3907  C   LEU D  38       0.901 -12.058-112.520  1.00  0.00           C  
ATOM   3908  O   LEU D  38       0.893 -11.389-113.552  1.00  0.00           O  
ATOM   3909  CB  LEU D  38      -0.151 -10.856-110.607  1.00  0.00           C  
ATOM   3910  CG  LEU D  38      -1.391 -10.559-109.753  1.00  0.00           C  
ATOM   3911  CD1 LEU D  38      -1.100  -9.386-108.827  1.00  0.00           C  
ATOM   3912  CD2 LEU D  38      -2.573 -10.258-110.662  1.00  0.00           C  
ATOM   3913  N   LEU D  39       1.915 -12.838-112.167  1.00  0.00           N  
ATOM   3914  CA  LEU D  39       3.038 -13.039-113.059  1.00  0.00           C  
ATOM   3915  C   LEU D  39       2.586 -13.840-114.271  1.00  0.00           C  
ATOM   3916  O   LEU D  39       3.047 -13.618-115.389  1.00  0.00           O  
ATOM   3917  CB  LEU D  39       4.178 -13.767-112.335  1.00  0.00           C  
ATOM   3918  CG  LEU D  39       4.909 -12.954-111.259  1.00  0.00           C  
ATOM   3919  CD1 LEU D  39       5.813 -13.877-110.452  1.00  0.00           C  
ATOM   3920  CD2 LEU D  39       5.711 -11.843-111.920  1.00  0.00           C  
ATOM   3921  N   ALA D  40       1.680 -14.780-114.037  1.00  0.00           N  
ATOM   3922  CA  ALA D  40       1.179 -15.623-115.102  1.00  0.00           C  
ATOM   3923  C   ALA D  40       0.262 -14.782-115.975  1.00  0.00           C  
ATOM   3924  O   ALA D  40       0.181 -14.979-117.189  1.00  0.00           O  
ATOM   3925  CB  ALA D  40       0.457 -16.841-114.546  1.00  0.00           C  
ATOM   3926  N   GLU D  41      -0.423 -13.836-115.357  1.00  0.00           N  
ATOM   3927  CA  GLU D  41      -1.332 -12.961-116.086  1.00  0.00           C  
ATOM   3928  C   GLU D  41      -0.522 -12.181-117.119  1.00  0.00           C  
ATOM   3929  O   GLU D  41       0.581 -11.714-116.823  1.00  0.00           O  
ATOM   3930  CB  GLU D  41      -2.059 -12.005-115.137  1.00  0.00           C  
ATOM   3931  CG  GLU D  41      -2.996 -12.689-114.152  1.00  0.00           C  
ATOM   3932  CD  GLU D  41      -4.183 -13.326-114.820  1.00  0.00           C  
ATOM   3933  OE1 GLU D  41      -4.877 -12.643-115.533  1.00  0.00           O  
ATOM   3934  OE2 GLU D  41      -4.395 -14.499-114.616  1.00  0.00           O1-
ATOM   3935  N   GLY D  42      -1.061 -12.028-118.325  1.00  0.00           N  
ATOM   3936  CA  GLY D  42      -0.318 -11.335-119.372  1.00  0.00           C  
ATOM   3937  C   GLY D  42       0.146 -12.324-120.427  1.00  0.00           C  
ATOM   3938  O   GLY D  42       0.443 -11.987-121.579  1.00  0.00           O  
ATOM   3939  N   GLN D  43       0.225 -13.570-119.981  1.00  0.00           N  
ATOM   3940  CA  GLN D  43       0.643 -14.665-120.813  1.00  0.00           C  
ATOM   3941  C   GLN D  43      -0.630 -15.076-121.517  1.00  0.00           C  
ATOM   3942  O   GLN D  43      -0.620 -15.737-122.542  1.00  0.00           O  
ATOM   3943  CB  GLN D  43       1.250 -15.816-120.006  1.00  0.00           C  
ATOM   3944  CG  GLN D  43       2.508 -15.443-119.240  1.00  0.00           C  
ATOM   3945  CD  GLN D  43       3.625 -14.977-120.153  1.00  0.00           C  
ATOM   3946  NE2 GLN D  43       4.233 -13.847-119.814  1.00  0.00           N  
ATOM   3947  OE1 GLN D  43       3.939 -15.628-121.154  1.00  0.00           O  
ATOM   3948  N   LYS D  44      -1.738 -14.634-120.947  1.00  0.00           N  
ATOM   3949  CA  LYS D  44      -3.039 -14.897-121.507  1.00  0.00           C  
ATOM   3950  C   LYS D  44      -2.989 -14.242-122.868  1.00  0.00           C  
ATOM   3951  O   LYS D  44      -3.373 -14.835-123.866  1.00  0.00           O  
ATOM   3952  CB  LYS D  44      -4.171 -14.338-120.643  1.00  0.00           C  
ATOM   3953  CG  LYS D  44      -4.407 -15.099-119.345  1.00  0.00           C  
ATOM   3954  CD  LYS D  44      -5.530 -14.472-118.533  1.00  0.00           C  
ATOM   3955  CE  LYS D  44      -5.879 -15.322-117.320  1.00  0.00           C  
ATOM   3956  NZ  LYS D  44      -6.808 -14.618-116.395  1.00  0.00           N1+
ATOM   3957  N   SER D  45      -2.468 -13.020-122.892  1.00  0.00           N  
ATOM   3958  CA  SER D  45      -2.387 -12.219-124.105  1.00  0.00           C  
ATOM   3959  C   SER D  45      -1.416 -12.819-125.107  1.00  0.00           C  
ATOM   3960  O   SER D  45      -1.743 -12.987-126.279  1.00  0.00           O  
ATOM   3961  CB  SER D  45      -1.963 -10.803-123.767  1.00  0.00           C  
ATOM   3962  OG  SER D  45      -1.868 -10.017-124.923  1.00  0.00           O  
ATOM   3963  N   ALA D  46      -0.217 -13.132-124.645  1.00  0.00           N  
ATOM   3964  CA  ALA D  46       0.796 -13.664-125.536  1.00  0.00           C  
ATOM   3965  C   ALA D  46       0.294 -14.955-126.184  1.00  0.00           C  
ATOM   3966  O   ALA D  46       0.421 -15.151-127.392  1.00  0.00           O  
ATOM   3967  CB  ALA D  46       2.097 -13.901-124.783  1.00  0.00           C  
ATOM   3968  N   VAL D  47      -0.288 -15.822-125.372  1.00  0.00           N  
ATOM   3969  CA  VAL D  47      -0.808 -17.087-125.862  1.00  0.00           C  
ATOM   3970  C   VAL D  47      -2.019 -16.954-126.775  1.00  0.00           C  
ATOM   3971  O   VAL D  47      -2.115 -17.651-127.777  1.00  0.00           O  
ATOM   3972  CB  VAL D  47      -1.188 -17.982-124.667  1.00  0.00           C  
ATOM   3973  CG1 VAL D  47      -1.952 -19.209-125.142  1.00  0.00           C  
ATOM   3974  CG2 VAL D  47       0.065 -18.388-123.906  1.00  0.00           C  
ATOM   3975  N   THR D  48      -2.942 -16.074-126.426  1.00  0.00           N  
ATOM   3976  CA  THR D  48      -4.143 -15.897-127.228  1.00  0.00           C  
ATOM   3977  C   THR D  48      -3.771 -15.387-128.612  1.00  0.00           C  
ATOM   3978  O   THR D  48      -4.270 -15.857-129.630  1.00  0.00           O  
ATOM   3979  CB  THR D  48      -5.130 -14.926-126.556  1.00  0.00           C  
ATOM   3980  CG2 THR D  48      -6.372 -14.747-127.417  1.00  0.00           C  
ATOM   3981  OG1 THR D  48      -5.512 -15.439-125.273  1.00  0.00           O  
ATOM   3982  N   GLU D  49      -2.887 -14.406-128.639  1.00  0.00           N  
ATOM   3983  CA  GLU D  49      -2.466 -13.860-129.901  1.00  0.00           C  
ATOM   3984  C   GLU D  49      -1.835 -14.961-130.750  1.00  0.00           C  
ATOM   3985  O   GLU D  49      -2.213 -15.140-131.910  1.00  0.00           O  
ATOM   3986  CB  GLU D  49      -1.476 -12.712-129.686  1.00  0.00           C  
ATOM   3987  CG  GLU D  49      -0.989 -12.053-130.969  1.00  0.00           C  
ATOM   3988  CD  GLU D  49      -0.012 -10.939-130.720  1.00  0.00           C  
ATOM   3989  OE1 GLU D  49       0.218 -10.620-129.578  1.00  0.00           O  
ATOM   3990  OE2 GLU D  49       0.507 -10.406-131.673  1.00  0.00           O1-
ATOM   3991  N   TYR D  50      -0.906 -15.724-130.172  1.00  0.00           N  
ATOM   3992  CA  TYR D  50      -0.311 -16.806-130.947  1.00  0.00           C  
ATOM   3993  C   TYR D  50      -1.364 -17.778-131.470  1.00  0.00           C  
ATOM   3994  O   TYR D  50      -1.384 -18.080-132.656  1.00  0.00           O  
ATOM   3995  CB  TYR D  50       0.723 -17.553-130.102  1.00  0.00           C  
ATOM   3996  CG  TYR D  50       1.429 -18.666-130.846  1.00  0.00           C  
ATOM   3997  CD1 TYR D  50       2.664 -18.432-131.433  1.00  0.00           C  
ATOM   3998  CD2 TYR D  50       0.842 -19.918-130.940  1.00  0.00           C  
ATOM   3999  CE1 TYR D  50       3.309 -19.448-132.112  1.00  0.00           C  
ATOM   4000  CE2 TYR D  50       1.487 -20.934-131.619  1.00  0.00           C  
ATOM   4001  CZ  TYR D  50       2.715 -20.702-132.203  1.00  0.00           C  
ATOM   4002  OH  TYR D  50       3.358 -21.714-132.879  1.00  0.00           O  
ATOM   4003  N   TYR D  51      -2.241 -18.257-130.591  1.00  0.00           N  
ATOM   4004  CA  TYR D  51      -3.258 -19.222-130.999  1.00  0.00           C  
ATOM   4005  C   TYR D  51      -4.195 -18.715-132.117  1.00  0.00           C  
ATOM   4006  O   TYR D  51      -4.468 -19.435-133.083  1.00  0.00           O  
ATOM   4007  CB  TYR D  51      -4.083 -19.637-129.779  1.00  0.00           C  
ATOM   4008  CG  TYR D  51      -5.168 -20.644-130.089  1.00  0.00           C  
ATOM   4009  CD1 TYR D  51      -4.835 -21.968-130.335  1.00  0.00           C  
ATOM   4010  CD2 TYR D  51      -6.495 -20.245-130.126  1.00  0.00           C  
ATOM   4011  CE1 TYR D  51      -5.826 -22.889-130.618  1.00  0.00           C  
ATOM   4012  CE2 TYR D  51      -7.486 -21.165-130.410  1.00  0.00           C  
ATOM   4013  CZ  TYR D  51      -7.155 -22.482-130.655  1.00  0.00           C  
ATOM   4014  OH  TYR D  51      -8.142 -23.398-130.937  1.00  0.00           O  
ATOM   4015  N   LEU D  52      -4.699 -17.492-131.973  1.00  0.00           N  
ATOM   4016  CA  LEU D  52      -5.580 -16.913-132.986  1.00  0.00           C  
ATOM   4017  C   LEU D  52      -4.873 -16.662-134.321  1.00  0.00           C  
ATOM   4018  O   LEU D  52      -5.489 -16.746-135.382  1.00  0.00           O  
ATOM   4019  CB  LEU D  52      -6.167 -15.595-132.466  1.00  0.00           C  
ATOM   4020  CG  LEU D  52      -7.162 -15.722-131.305  1.00  0.00           C  
ATOM   4021  CD1 LEU D  52      -7.594 -14.335-130.852  1.00  0.00           C  
ATOM   4022  CD2 LEU D  52      -8.359 -16.549-131.750  1.00  0.00           C  
ATOM   4023  N   ASN D  53      -3.580 -16.372-134.279  1.00  0.00           N  
ATOM   4024  CA  ASN D  53      -2.852 -16.141-135.521  1.00  0.00           C  
ATOM   4025  C   ASN D  53      -2.329 -17.433-136.150  1.00  0.00           C  
ATOM   4026  O   ASN D  53      -2.061 -17.465-137.345  1.00  0.00           O  
ATOM   4027  CB  ASN D  53      -1.709 -15.172-135.283  1.00  0.00           C  
ATOM   4028  CG  ASN D  53      -2.186 -13.773-135.008  1.00  0.00           C  
ATOM   4029  ND2 ASN D  53      -1.389 -13.013-134.301  1.00  0.00           N  
ATOM   4030  OD1 ASN D  53      -3.276 -13.380-135.438  1.00  0.00           O  
ATOM   4031  N   HIS D  54      -2.193 -18.496-135.363  1.00  0.00           N  
ATOM   4032  CA  HIS D  54      -1.635 -19.736-135.890  1.00  0.00           C  
ATOM   4033  C   HIS D  54      -2.535 -20.970-135.882  1.00  0.00           C  
ATOM   4034  O   HIS D  54      -2.450 -21.799-136.782  1.00  0.00           O  
ATOM   4035  CB  HIS D  54      -0.356 -20.072-135.116  1.00  0.00           C  
ATOM   4036  CG  HIS D  54       0.748 -19.082-135.321  1.00  0.00           C  
ATOM   4037  CD2 HIS D  54       1.181 -18.057-134.550  1.00  0.00           C  
ATOM   4038  ND1 HIS D  54       1.554 -19.088-136.440  1.00  0.00           N  
ATOM   4039  CE1 HIS D  54       2.435 -18.107-136.348  1.00  0.00           C  
ATOM   4040  NE2 HIS D  54       2.230 -17.468-135.211  1.00  0.00           N  
ATOM   4041  N   GLY D  55      -3.389 -21.099-134.874  1.00  0.00           N  
ATOM   4042  CA  GLY D  55      -4.287 -22.237-134.845  1.00  0.00           C  
ATOM   4043  C   GLY D  55      -3.832 -23.315-133.880  1.00  0.00           C  
ATOM   4044  O   GLY D  55      -4.586 -24.232-133.585  1.00  0.00           O  
ATOM   4045  N   LYS D  56      -2.590 -23.214-133.417  1.00  0.00           N  
ATOM   4046  CA  LYS D  56      -2.001 -24.175-132.483  1.00  0.00           C  
ATOM   4047  C   LYS D  56      -1.554 -23.376-131.262  1.00  0.00           C  
ATOM   4048  O   LYS D  56      -1.489 -22.147-131.329  1.00  0.00           O  
ATOM   4049  CB  LYS D  56      -0.829 -24.933-133.109  1.00  0.00           C  
ATOM   4050  CG  LYS D  56      -1.211 -25.825-134.282  1.00  0.00           C  
ATOM   4051  CD  LYS D  56      -2.062 -27.001-133.828  1.00  0.00           C  
ATOM   4052  CE  LYS D  56      -2.431 -27.903-134.997  1.00  0.00           C  
ATOM   4053  NZ  LYS D  56      -3.230 -29.080-134.562  1.00  0.00           N1+
ATOM   4054  N   TRP D  57      -1.277 -24.054-130.148  1.00  0.00           N  
ATOM   4055  CA  TRP D  57      -0.943 -23.363-128.903  1.00  0.00           C  
ATOM   4056  C   TRP D  57       0.555 -23.233-128.769  1.00  0.00           C  
ATOM   4057  O   TRP D  57       1.300 -24.075-129.265  1.00  0.00           O  
ATOM   4058  CB  TRP D  57      -1.505 -24.112-127.694  1.00  0.00           C  
ATOM   4059  CG  TRP D  57      -3.001 -24.186-127.677  1.00  0.00           C  
ATOM   4060  CD1 TRP D  57      -3.774 -25.184-128.190  1.00  0.00           C  
ATOM   4061  CD2 TRP D  57      -3.919 -23.217-127.116  1.00  0.00           C  
ATOM   4062  CE2 TRP D  57      -5.211 -23.705-127.332  1.00  0.00           C  
ATOM   4063  CE3 TRP D  57      -3.751 -21.993-126.457  1.00  0.00           C  
ATOM   4064  NE1 TRP D  57      -5.103 -24.905-127.989  1.00  0.00           N  
ATOM   4065  CZ2 TRP D  57      -6.336 -23.013-126.914  1.00  0.00           C  
ATOM   4066  CZ3 TRP D  57      -4.880 -21.299-126.037  1.00  0.00           C  
ATOM   4067  CH2 TRP D  57      -6.139 -21.797-126.260  1.00  0.00           C  
ATOM   4068  N   PRO D  58       1.032 -22.169-128.098  1.00  0.00           N  
ATOM   4069  CA  PRO D  58       2.482 -22.002-127.919  1.00  0.00           C  
ATOM   4070  C   PRO D  58       3.099 -23.211-127.227  1.00  0.00           C  
ATOM   4071  O   PRO D  58       2.660 -23.603-126.148  1.00  0.00           O  
ATOM   4072  CB  PRO D  58       2.582 -20.745-127.048  1.00  0.00           C  
ATOM   4073  CG  PRO D  58       1.337 -19.986-127.356  1.00  0.00           C  
ATOM   4074  CD  PRO D  58       0.281 -21.047-127.516  1.00  0.00           C  
ATOM   4075  N   GLU D  59       4.112 -23.804-127.851  1.00  0.00           N  
ATOM   4076  CA  GLU D  59       4.829 -24.922-127.237  1.00  0.00           C  
ATOM   4077  C   GLU D  59       5.789 -24.533-126.129  1.00  0.00           C  
ATOM   4078  O   GLU D  59       6.038 -25.327-125.228  1.00  0.00           O  
ATOM   4079  CB  GLU D  59       5.603 -25.687-128.313  1.00  0.00           C  
ATOM   4080  CG  GLU D  59       4.725 -26.425-129.314  1.00  0.00           C  
ATOM   4081  CD  GLU D  59       5.519 -27.142-130.370  1.00  0.00           C  
ATOM   4082  OE1 GLU D  59       6.713 -26.966-130.411  1.00  0.00           O  
ATOM   4083  OE2 GLU D  59       4.930 -27.867-131.137  1.00  0.00           O1-
ATOM   4084  N   ASN D  60       6.329 -23.324-126.210  1.00  0.00           N  
ATOM   4085  CA  ASN D  60       7.208 -22.809-125.168  1.00  0.00           C  
ATOM   4086  C   ASN D  60       7.200 -21.288-125.139  1.00  0.00           C  
ATOM   4087  O   ASN D  60       6.535 -20.650-125.952  1.00  0.00           O  
ATOM   4088  CB  ASN D  60       8.621 -23.331-125.355  1.00  0.00           C  
ATOM   4089  CG  ASN D  60       9.203 -22.955-126.689  1.00  0.00           C  
ATOM   4090  ND2 ASN D  60       9.953 -23.855-127.274  1.00  0.00           N  
ATOM   4091  OD1 ASN D  60       8.974 -21.849-127.191  1.00  0.00           O  
ATOM   4092  N   ASN D  61       7.942 -20.703-124.203  1.00  0.00           N  
ATOM   4093  CA  ASN D  61       8.008 -19.252-124.078  1.00  0.00           C  
ATOM   4094  C   ASN D  61       8.511 -18.513-125.311  1.00  0.00           C  
ATOM   4095  O   ASN D  61       8.036 -17.410-125.629  1.00  0.00           O  
ATOM   4096  CB  ASN D  61       8.869 -18.890-122.882  1.00  0.00           C  
ATOM   4097  CG  ASN D  61       8.222 -19.249-121.573  1.00  0.00           C  
ATOM   4098  ND2 ASN D  61       8.824 -18.829-120.490  1.00  0.00           N  
ATOM   4099  OD1 ASN D  61       7.176 -19.907-121.544  1.00  0.00           O  
ATOM   4100  N   THR D  62       9.480 -19.113-125.998  1.00  0.00           N  
ATOM   4101  CA  THR D  62      10.021 -18.535-127.218  1.00  0.00           C  
ATOM   4102  C   THR D  62       8.958 -18.468-128.295  1.00  0.00           C  
ATOM   4103  O   THR D  62       8.883 -17.503-129.043  1.00  0.00           O  
ATOM   4104  CB  THR D  62      11.229 -19.340-127.730  1.00  0.00           C  
ATOM   4105  CG2 THR D  62      11.757 -18.743-129.026  1.00  0.00           C  
ATOM   4106  OG1 THR D  62      12.269 -19.326-126.743  1.00  0.00           O  
ATOM   4107  N   SER D  63       8.124 -19.495-128.368  1.00  0.00           N  
ATOM   4108  CA  SER D  63       7.069 -19.508-129.362  1.00  0.00           C  
ATOM   4109  C   SER D  63       6.005 -18.508-128.960  1.00  0.00           C  
ATOM   4110  O   SER D  63       5.355 -17.912-129.816  1.00  0.00           O  
ATOM   4111  CB  SER D  63       6.468 -20.894-129.493  1.00  0.00           C  
ATOM   4112  OG  SER D  63       5.773 -21.252-128.330  1.00  0.00           O  
ATOM   4113  N   ALA D  64       5.823 -18.327-127.653  1.00  0.00           N  
ATOM   4114  CA  ALA D  64       4.870 -17.343-127.151  1.00  0.00           C  
ATOM   4115  C   ALA D  64       5.328 -15.923-127.458  1.00  0.00           C  
ATOM   4116  O   ALA D  64       4.520 -15.041-127.750  1.00  0.00           O  
ATOM   4117  CB  ALA D  64       4.660 -17.522-125.655  1.00  0.00           C  
ATOM   4118  N   GLY D  65       6.631 -15.714-127.404  1.00  0.00           N  
ATOM   4119  CA  GLY D  65       7.168 -14.404-127.711  1.00  0.00           C  
ATOM   4120  C   GLY D  65       7.450 -13.638-126.436  1.00  0.00           C  
ATOM   4121  O   GLY D  65       7.390 -12.403-126.415  1.00  0.00           O  
ATOM   4122  N   VAL D  66       7.733 -14.372-125.364  1.00  0.00           N  
ATOM   4123  CA  VAL D  66       7.981 -13.768-124.062  1.00  0.00           C  
ATOM   4124  C   VAL D  66       9.334 -14.252-123.597  1.00  0.00           C  
ATOM   4125  O   VAL D  66      10.003 -14.996-124.316  1.00  0.00           O  
ATOM   4126  CB  VAL D  66       6.896 -14.160-123.041  1.00  0.00           C  
ATOM   4127  CG1 VAL D  66       5.528 -13.689-123.511  1.00  0.00           C  
ATOM   4128  CG2 VAL D  66       6.905 -15.666-122.827  1.00  0.00           C  
ATOM   4129  N   ALA D  67       9.733 -13.833-122.401  1.00  0.00           N  
ATOM   4130  CA  ALA D  67      11.016 -14.226-121.837  1.00  0.00           C  
ATOM   4131  C   ALA D  67      11.167 -15.735-121.966  1.00  0.00           C  
ATOM   4132  O   ALA D  67      10.425 -16.508-121.360  1.00  0.00           O  
ATOM   4133  CB  ALA D  67      11.133 -13.786-120.385  1.00  0.00           C  
ATOM   4134  N   SER D  68      12.125 -16.141-122.787  1.00  0.00           N  
ATOM   4135  CA  SER D  68      12.274 -17.534-123.180  1.00  0.00           C  
ATOM   4136  C   SER D  68      12.450 -18.462-121.994  1.00  0.00           C  
ATOM   4137  O   SER D  68      11.898 -19.549-121.970  1.00  0.00           O  
ATOM   4138  CB  SER D  68      13.460 -17.678-124.114  1.00  0.00           C  
ATOM   4139  OG  SER D  68      13.228 -17.018-125.327  1.00  0.00           O  
ATOM   4140  N   SER D  69      13.214 -18.019-121.004  1.00  0.00           N  
ATOM   4141  CA  SER D  69      13.456 -18.823-119.813  1.00  0.00           C  
ATOM   4142  C   SER D  69      12.352 -18.619-118.763  1.00  0.00           C  
ATOM   4143  O   SER D  69      12.019 -17.486-118.421  1.00  0.00           O  
ATOM   4144  CB  SER D  69      14.806 -18.471-119.220  1.00  0.00           C  
ATOM   4145  OG  SER D  69      15.072 -19.244-118.082  1.00  0.00           O  
ATOM   4146  N   PRO D  70      11.763 -19.717-118.248  1.00  0.00           N  
ATOM   4147  CA  PRO D  70      10.734 -19.626-117.202  1.00  0.00           C  
ATOM   4148  C   PRO D  70      11.228 -18.833-116.003  1.00  0.00           C  
ATOM   4149  O   PRO D  70      10.460 -18.155-115.322  1.00  0.00           O  
ATOM   4150  CB  PRO D  70      10.478 -21.091-116.836  1.00  0.00           C  
ATOM   4151  CG  PRO D  70      10.816 -21.843-118.078  1.00  0.00           C  
ATOM   4152  CD  PRO D  70      12.014 -21.122-118.637  1.00  0.00           C  
ATOM   4153  N   THR D  71      12.533 -18.926-115.769  1.00  0.00           N  
ATOM   4154  CA  THR D  71      13.189 -18.282-114.637  1.00  0.00           C  
ATOM   4155  C   THR D  71      13.233 -16.768-114.765  1.00  0.00           C  
ATOM   4156  O   THR D  71      13.514 -16.064-113.802  1.00  0.00           O  
ATOM   4157  CB  THR D  71      14.622 -18.817-114.463  1.00  0.00           C  
ATOM   4158  CG2 THR D  71      14.612 -20.331-114.315  1.00  0.00           C  
ATOM   4159  OG1 THR D  71      15.411 -18.458-115.605  1.00  0.00           O  
ATOM   4160  N   ASP D  72      12.967 -16.255-115.950  1.00  0.00           N  
ATOM   4161  CA  ASP D  72      12.947 -14.816-116.124  1.00  0.00           C  
ATOM   4162  C   ASP D  72      11.560 -14.259-115.809  1.00  0.00           C  
ATOM   4163  O   ASP D  72      11.343 -13.045-115.861  1.00  0.00           O  
ATOM   4164  CB  ASP D  72      13.352 -14.441-117.552  1.00  0.00           C  
ATOM   4165  CG  ASP D  72      14.809 -14.761-117.858  1.00  0.00           C  
ATOM   4166  OD1 ASP D  72      15.580 -14.868-116.934  1.00  0.00           O  
ATOM   4167  OD2 ASP D  72      15.137 -14.894-119.013  1.00  0.00           O1-
ATOM   4168  N   ILE D  73      10.626 -15.150-115.478  1.00  0.00           N  
ATOM   4169  CA  ILE D  73       9.288 -14.748-115.050  1.00  0.00           C  
ATOM   4170  C   ILE D  73       9.067 -15.193-113.606  1.00  0.00           C  
ATOM   4171  O   ILE D  73       8.279 -16.097-113.317  1.00  0.00           O  
ATOM   4172  CB  ILE D  73       8.201 -15.350-115.958  1.00  0.00           C  
ATOM   4173  CG1 ILE D  73       8.462 -14.980-117.421  1.00  0.00           C  
ATOM   4174  CG2 ILE D  73       6.822 -14.877-115.524  1.00  0.00           C  
ATOM   4175  CD1 ILE D  73       7.566 -15.701-118.402  1.00  0.00           C  
ATOM   4176  N   LYS D  74       9.777 -14.534-112.698  1.00  0.00           N  
ATOM   4177  CA  LYS D  74       9.762 -14.907-111.296  1.00  0.00           C  
ATOM   4178  C   LYS D  74       9.333 -13.755-110.406  1.00  0.00           C  
ATOM   4179  O   LYS D  74       9.249 -12.604-110.841  1.00  0.00           O  
ATOM   4180  CB  LYS D  74      11.141 -15.412-110.868  1.00  0.00           C  
ATOM   4181  CG  LYS D  74      12.247 -14.368-110.954  1.00  0.00           C  
ATOM   4182  CD  LYS D  74      13.591 -14.952-110.543  1.00  0.00           C  
ATOM   4183  CE  LYS D  74      14.686 -13.896-110.571  1.00  0.00           C  
ATOM   4184  NZ  LYS D  74      16.006 -14.453-110.171  1.00  0.00           N1+
ATOM   4185  N   GLY D  75       9.066 -14.088-109.151  1.00  0.00           N  
ATOM   4186  CA  GLY D  75       8.613 -13.106-108.196  1.00  0.00           C  
ATOM   4187  C   GLY D  75       9.456 -13.141-106.938  1.00  0.00           C  
ATOM   4188  O   GLY D  75      10.538 -13.731-106.909  1.00  0.00           O  
ATOM   4189  N   LYS D  76       8.951 -12.506-105.891  1.00  0.00           N  
ATOM   4190  CA  LYS D  76       9.596 -12.490-104.585  1.00  0.00           C  
ATOM   4191  C   LYS D  76       9.495 -13.861-103.932  1.00  0.00           C  
ATOM   4192  O   LYS D  76      10.428 -14.329-103.281  1.00  0.00           O  
ATOM   4193  CB  LYS D  76       8.970 -11.424-103.684  1.00  0.00           C  
ATOM   4194  CG  LYS D  76       9.693 -11.217-102.360  1.00  0.00           C  
ATOM   4195  CD  LYS D  76       9.123 -10.028-101.600  1.00  0.00           C  
ATOM   4196  CE  LYS D  76      10.024  -9.629-100.440  1.00  0.00           C  
ATOM   4197  NZ  LYS D  76      10.155 -10.720 -99.436  1.00  0.00           N1+
ATOM   4198  N   TYR D  77       8.346 -14.500-104.113  1.00  0.00           N  
ATOM   4199  CA  TYR D  77       8.069 -15.773-103.475  1.00  0.00           C  
ATOM   4200  C   TYR D  77       7.802 -16.805-104.552  1.00  0.00           C  
ATOM   4201  O   TYR D  77       7.457 -17.951-104.264  1.00  0.00           O  
ATOM   4202  CB  TYR D  77       6.882 -15.665-102.515  1.00  0.00           C  
ATOM   4203  CG  TYR D  77       7.058 -14.612-101.444  1.00  0.00           C  
ATOM   4204  CD1 TYR D  77       6.357 -13.417-101.524  1.00  0.00           C  
ATOM   4205  CD2 TYR D  77       7.920 -14.840-100.382  1.00  0.00           C  
ATOM   4206  CE1 TYR D  77       6.517 -12.455-100.545  1.00  0.00           C  
ATOM   4207  CE2 TYR D  77       8.080 -13.878 -99.403  1.00  0.00           C  
ATOM   4208  CZ  TYR D  77       7.383 -12.690 -99.483  1.00  0.00           C  
ATOM   4209  OH  TYR D  77       7.543 -11.732 -98.509  1.00  0.00           O  
ATOM   4210  N   VAL D  78       7.958 -16.384-105.802  1.00  0.00           N  
ATOM   4211  CA  VAL D  78       7.598 -17.220-106.927  1.00  0.00           C  
ATOM   4212  C   VAL D  78       8.821 -17.675-107.685  1.00  0.00           C  
ATOM   4213  O   VAL D  78       9.676 -16.876-108.041  1.00  0.00           O  
ATOM   4214  CB  VAL D  78       6.662 -16.458-107.883  1.00  0.00           C  
ATOM   4215  CG1 VAL D  78       6.307 -17.323-109.084  1.00  0.00           C  
ATOM   4216  CG2 VAL D  78       5.407 -16.023-107.142  1.00  0.00           C  
ATOM   4217  N   LYS D  79       8.894 -18.977-107.923  1.00  0.00           N  
ATOM   4218  CA  LYS D  79      10.050 -19.568-108.577  1.00  0.00           C  
ATOM   4219  C   LYS D  79      10.065 -19.216-110.060  1.00  0.00           C  
ATOM   4220  O   LYS D  79      11.005 -18.578-110.539  1.00  0.00           O  
ATOM   4221  CB  LYS D  79      10.057 -21.086-108.391  1.00  0.00           C  
ATOM   4222  CG  LYS D  79      11.263 -21.789-108.999  1.00  0.00           C  
ATOM   4223  CD  LYS D  79      11.213 -23.288-108.747  1.00  0.00           C  
ATOM   4224  CE  LYS D  79      12.388 -24.000-109.402  1.00  0.00           C  
ATOM   4225  NZ  LYS D  79      12.359 -25.467-109.154  1.00  0.00           N1+
ATOM   4226  N   GLU D  80       9.016 -19.634-110.780  1.00  0.00           N  
ATOM   4227  CA  GLU D  80       8.956 -19.477-112.230  1.00  0.00           C  
ATOM   4228  C   GLU D  80       7.595 -19.745-112.868  1.00  0.00           C  
ATOM   4229  O   GLU D  80       6.715 -20.372-112.283  1.00  0.00           O  
ATOM   4230  CB  GLU D  80       9.992 -20.399-112.877  1.00  0.00           C  
ATOM   4231  CG  GLU D  80       9.755 -21.882-112.630  1.00  0.00           C  
ATOM   4232  CD  GLU D  80      10.875 -22.746-113.140  1.00  0.00           C  
ATOM   4233  OE1 GLU D  80      11.794 -22.216-113.716  1.00  0.00           O  
ATOM   4234  OE2 GLU D  80      10.810 -23.939-112.954  1.00  0.00           O1-
ATOM   4235  N   VAL D  81       7.450 -19.246-114.087  1.00  0.00           N  
ATOM   4236  CA  VAL D  81       6.241 -19.387-114.875  1.00  0.00           C  
ATOM   4237  C   VAL D  81       6.679 -19.894-116.247  1.00  0.00           C  
ATOM   4238  O   VAL D  81       7.559 -19.316-116.891  1.00  0.00           O  
ATOM   4239  CB  VAL D  81       5.492 -18.047-115.004  1.00  0.00           C  
ATOM   4240  CG1 VAL D  81       4.241 -18.215-115.853  1.00  0.00           C  
ATOM   4241  CG2 VAL D  81       5.139 -17.517-113.622  1.00  0.00           C  
ATOM   4242  N   GLU D  82       6.061 -20.987-116.677  1.00  0.00           N  
ATOM   4243  CA  GLU D  82       6.362 -21.596-117.959  1.00  0.00           C  
ATOM   4244  C   GLU D  82       5.119 -21.760-118.817  1.00  0.00           C  
ATOM   4245  O   GLU D  82       4.092 -22.264-118.373  1.00  0.00           O  
ATOM   4246  CB  GLU D  82       7.029 -22.958-117.751  1.00  0.00           C  
ATOM   4247  CG  GLU D  82       7.411 -23.674-119.038  1.00  0.00           C  
ATOM   4248  CD  GLU D  82       8.095 -24.990-118.795  1.00  0.00           C  
ATOM   4249  OE1 GLU D  82       8.285 -25.337-117.654  1.00  0.00           O  
ATOM   4250  OE2 GLU D  82       8.427 -25.651-119.751  1.00  0.00           O1-
ATOM   4251  N   VAL D  83       5.222 -21.297-120.056  1.00  0.00           N  
ATOM   4252  CA  VAL D  83       4.160 -21.447-121.030  1.00  0.00           C  
ATOM   4253  C   VAL D  83       4.529 -22.691-121.796  1.00  0.00           C  
ATOM   4254  O   VAL D  83       5.644 -22.805-122.320  1.00  0.00           O  
ATOM   4255  CB  VAL D  83       4.055 -20.231-121.969  1.00  0.00           C  
ATOM   4256  CG1 VAL D  83       2.938 -20.435-122.981  1.00  0.00           C  
ATOM   4257  CG2 VAL D  83       3.823 -18.967-121.156  1.00  0.00           C  
ATOM   4258  N   LYS D  84       3.604 -23.633-121.853  1.00  0.00           N  
ATOM   4259  CA  LYS D  84       3.833 -24.873-122.574  1.00  0.00           C  
ATOM   4260  C   LYS D  84       2.490 -25.402-123.055  1.00  0.00           C  
ATOM   4261  O   LYS D  84       1.613 -25.720-122.242  1.00  0.00           O  
ATOM   4262  CB  LYS D  84       4.542 -25.903-121.694  1.00  0.00           C  
ATOM   4263  CG  LYS D  84       4.898 -27.201-122.407  1.00  0.00           C  
ATOM   4264  CD  LYS D  84       5.691 -28.130-121.500  1.00  0.00           C  
ATOM   4265  CE  LYS D  84       6.046 -29.428-122.210  1.00  0.00           C  
ATOM   4266  NZ  LYS D  84       6.827 -30.345-121.336  1.00  0.00           N1+
ATOM   4267  N   ASN D  85       2.349 -25.482-124.379  1.00  0.00           N  
ATOM   4268  CA  ASN D  85       1.148 -25.989-125.040  1.00  0.00           C  
ATOM   4269  C   ASN D  85      -0.094 -25.190-124.657  1.00  0.00           C  
ATOM   4270  O   ASN D  85      -1.166 -25.752-124.450  1.00  0.00           O  
ATOM   4271  CB  ASN D  85       0.950 -27.460-124.721  1.00  0.00           C  
ATOM   4272  CG  ASN D  85       2.071 -28.319-125.235  1.00  0.00           C  
ATOM   4273  ND2 ASN D  85       2.425 -29.330-124.483  1.00  0.00           N  
ATOM   4274  OD1 ASN D  85       2.617 -28.067-126.315  1.00  0.00           O  
ATOM   4275  N   GLY D  86       0.075 -23.873-124.563  1.00  0.00           N  
ATOM   4276  CA  GLY D  86      -1.031 -22.996-124.209  1.00  0.00           C  
ATOM   4277  C   GLY D  86      -1.384 -22.989-122.732  1.00  0.00           C  
ATOM   4278  O   GLY D  86      -2.336 -22.326-122.329  1.00  0.00           O  
ATOM   4279  N   VAL D  87      -0.633 -23.738-121.928  1.00  0.00           N  
ATOM   4280  CA  VAL D  87      -0.879 -23.813-120.491  1.00  0.00           C  
ATOM   4281  C   VAL D  87       0.189 -22.979-119.803  1.00  0.00           C  
ATOM   4282  O   VAL D  87       1.370 -23.116-120.110  1.00  0.00           O  
ATOM   4283  CB  VAL D  87      -0.826 -25.267-119.985  1.00  0.00           C  
ATOM   4284  CG1 VAL D  87      -1.018 -25.313-118.477  1.00  0.00           C  
ATOM   4285  CG2 VAL D  87      -1.887 -26.098-120.690  1.00  0.00           C  
ATOM   4286  N   VAL D  88      -0.221 -22.115-118.885  1.00  0.00           N  
ATOM   4287  CA  VAL D  88       0.728 -21.250-118.225  1.00  0.00           C  
ATOM   4288  C   VAL D  88       0.811 -21.651-116.759  1.00  0.00           C  
ATOM   4289  O   VAL D  88      -0.083 -21.350-115.969  1.00  0.00           O  
ATOM   4290  CB  VAL D  88       0.304 -19.774-118.349  1.00  0.00           C  
ATOM   4291  CG1 VAL D  88       1.347 -18.865-117.717  1.00  0.00           C  
ATOM   4292  CG2 VAL D  88       0.093 -19.418-119.813  1.00  0.00           C  
ATOM   4293  N   THR D  89       1.878 -22.363-116.413  1.00  0.00           N  
ATOM   4294  CA  THR D  89       2.020 -22.977-115.098  1.00  0.00           C  
ATOM   4295  C   THR D  89       3.001 -22.207-114.225  1.00  0.00           C  
ATOM   4296  O   THR D  89       4.096 -21.872-114.662  1.00  0.00           O  
ATOM   4297  CB  THR D  89       2.479 -24.442-115.218  1.00  0.00           C  
ATOM   4298  CG2 THR D  89       2.690 -25.049-113.840  1.00  0.00           C  
ATOM   4299  OG1 THR D  89       1.487 -25.200-115.924  1.00  0.00           O  
ATOM   4300  N   ALA D  90       2.615 -21.920-112.986  1.00  0.00           N  
ATOM   4301  CA  ALA D  90       3.490 -21.156-112.098  1.00  0.00           C  
ATOM   4302  C   ALA D  90       3.878 -21.997-110.898  1.00  0.00           C  
ATOM   4303  O   ALA D  90       3.050 -22.731-110.376  1.00  0.00           O  
ATOM   4304  CB  ALA D  90       2.815 -19.866-111.652  1.00  0.00           C  
ATOM   4305  N   THR D  91       5.135 -21.890-110.467  1.00  0.00           N  
ATOM   4306  CA  THR D  91       5.608 -22.666-109.326  1.00  0.00           C  
ATOM   4307  C   THR D  91       6.184 -21.781-108.232  1.00  0.00           C  
ATOM   4308  O   THR D  91       6.912 -20.814-108.492  1.00  0.00           O  
ATOM   4309  CB  THR D  91       6.670 -23.693-109.762  1.00  0.00           C  
ATOM   4310  CG2 THR D  91       7.165 -24.489-108.565  1.00  0.00           C  
ATOM   4311  OG1 THR D  91       6.103 -24.589-110.727  1.00  0.00           O  
ATOM   4312  N   MET D  92       5.828 -22.118-106.996  1.00  0.00           N  
ATOM   4313  CA  MET D  92       6.229 -21.334-105.840  1.00  0.00           C  
ATOM   4314  C   MET D  92       7.627 -21.764-105.407  1.00  0.00           C  
ATOM   4315  O   MET D  92       8.064 -22.873-105.706  1.00  0.00           O  
ATOM   4316  CB  MET D  92       5.226 -21.500-104.700  1.00  0.00           C  
ATOM   4317  CG  MET D  92       3.821 -21.012-105.022  1.00  0.00           C  
ATOM   4318  SD  MET D  92       3.768 -19.252-105.413  1.00  0.00           S  
ATOM   4319  CE  MET D  92       4.231 -18.542-103.836  1.00  0.00           C  
ATOM   4320  N   LEU D  93       8.321 -20.875-104.712  1.00  0.00           N  
ATOM   4321  CA  LEU D  93       9.586 -21.208-104.071  1.00  0.00           C  
ATOM   4322  C   LEU D  93       9.309 -22.013-102.797  1.00  0.00           C  
ATOM   4323  O   LEU D  93       8.158 -22.322-102.475  1.00  0.00           O  
ATOM   4324  CB  LEU D  93      10.374 -19.935-103.738  1.00  0.00           C  
ATOM   4325  CG  LEU D  93      10.895 -19.141-104.942  1.00  0.00           C  
ATOM   4326  CD1 LEU D  93      11.433 -17.797-104.470  1.00  0.00           C  
ATOM   4327  CD2 LEU D  93      11.975 -19.943-105.652  1.00  0.00           C  
ATOM   4328  N   SER D  94      10.370 -22.360-102.077  1.00  0.00           N  
ATOM   4329  CA  SER D  94      10.219 -22.972-100.767  1.00  0.00           C  
ATOM   4330  C   SER D  94      10.940 -22.111 -99.745  1.00  0.00           C  
ATOM   4331  O   SER D  94      10.826 -22.337 -98.543  1.00  0.00           O  
ATOM   4332  CB  SER D  94      10.777 -24.382-100.762  1.00  0.00           C  
ATOM   4333  OG  SER D  94      12.157 -24.376-101.003  1.00  0.00           O  
ATOM   4334  N   SER D  95      11.676 -21.120-100.237  1.00  0.00           N  
ATOM   4335  CA  SER D  95      12.396 -20.183 -99.377  1.00  0.00           C  
ATOM   4336  C   SER D  95      11.626 -18.874 -99.212  1.00  0.00           C  
ATOM   4337  O   SER D  95      11.527 -18.074-100.147  1.00  0.00           O  
ATOM   4338  CB  SER D  95      13.770 -19.901 -99.951  1.00  0.00           C  
ATOM   4339  OG  SER D  95      14.445 -18.938 -99.189  1.00  0.00           O  
ATOM   4340  N   GLY D  96      11.083 -18.666 -98.015  1.00  0.00           N  
ATOM   4341  CA  GLY D  96      10.192 -17.545 -97.783  1.00  0.00           C  
ATOM   4342  C   GLY D  96       8.723 -17.846 -98.009  1.00  0.00           C  
ATOM   4343  O   GLY D  96       7.857 -17.067 -97.605  1.00  0.00           O  
ATOM   4344  N   VAL D  97       8.430 -18.978 -98.646  1.00  0.00           N  
ATOM   4345  CA  VAL D  97       7.041 -19.380 -98.869  1.00  0.00           C  
ATOM   4346  C   VAL D  97       6.419 -20.190 -97.719  1.00  0.00           C  
ATOM   4347  O   VAL D  97       7.065 -21.059 -97.133  1.00  0.00           O  
ATOM   4348  CB  VAL D  97       6.955 -20.212-100.162  1.00  0.00           C  
ATOM   4349  CG1 VAL D  97       5.543 -20.741-100.363  1.00  0.00           C  
ATOM   4350  CG2 VAL D  97       7.389 -19.368-101.351  1.00  0.00           C  
ATOM   4351  N   ASN D  98       5.163 -19.893 -97.405  1.00  0.00           N  
ATOM   4352  CA  ASN D  98       4.509 -20.401 -96.207  1.00  0.00           C  
ATOM   4353  C   ASN D  98       4.990 -21.795 -95.838  1.00  0.00           C  
ATOM   4354  O   ASN D  98       5.943 -21.953 -95.075  1.00  0.00           O  
ATOM   4355  CB  ASN D  98       3.002 -20.393 -96.386  1.00  0.00           C  
ATOM   4356  CG  ASN D  98       2.274 -20.909 -95.176  1.00  0.00           C  
ATOM   4357  ND2 ASN D  98       2.053 -20.048 -94.216  1.00  0.00           N  
ATOM   4358  OD1 ASN D  98       1.911 -22.090 -95.112  1.00  0.00           O  
ATOM   4359  N   ASN D  99       4.327 -22.804 -96.383  1.00  0.00           N  
ATOM   4360  CA  ASN D  99       4.675 -24.185 -96.099  1.00  0.00           C  
ATOM   4361  C   ASN D  99       3.620 -25.073 -96.742  1.00  0.00           C  
ATOM   4362  O   ASN D  99       3.917 -26.149 -97.257  1.00  0.00           O  
ATOM   4363  CB  ASN D  99       4.781 -24.438 -94.606  1.00  0.00           C  
ATOM   4364  CG  ASN D  99       5.196 -25.848 -94.287  1.00  0.00           C  
ATOM   4365  ND2 ASN D  99       5.106 -26.213 -93.033  1.00  0.00           N  
ATOM   4366  OD1 ASN D  99       5.598 -26.606 -95.176  1.00  0.00           O  
ATOM   4367  N   GLU D 100       2.376 -24.617 -96.709  1.00  0.00           N  
ATOM   4368  CA  GLU D 100       1.302 -25.397 -97.291  1.00  0.00           C  
ATOM   4369  C   GLU D 100       1.231 -25.157 -98.781  1.00  0.00           C  
ATOM   4370  O   GLU D 100       0.569 -25.893 -99.504  1.00  0.00           O  
ATOM   4371  CB  GLU D 100      -0.037 -25.048 -96.638  1.00  0.00           C  
ATOM   4372  CG  GLU D 100      -0.143 -25.442 -95.171  1.00  0.00           C  
ATOM   4373  CD  GLU D 100      -1.500 -25.163 -94.587  1.00  0.00           C  
ATOM   4374  OE1 GLU D 100      -2.324 -24.617 -95.281  1.00  0.00           O  
ATOM   4375  OE2 GLU D 100      -1.713 -25.496 -93.445  1.00  0.00           O1-
ATOM   4376  N   ILE D 101       1.919 -24.121 -99.248  1.00  0.00           N  
ATOM   4377  CA  ILE D 101       2.031 -23.889-100.683  1.00  0.00           C  
ATOM   4378  C   ILE D 101       3.469 -23.906-101.213  1.00  0.00           C  
ATOM   4379  O   ILE D 101       3.713 -23.510-102.352  1.00  0.00           O  
ATOM   4380  CB  ILE D 101       1.380 -22.542-101.047  1.00  0.00           C  
ATOM   4381  CG1 ILE D 101       2.070 -21.397-100.300  1.00  0.00           C  
ATOM   4382  CG2 ILE D 101      -0.107 -22.567-100.733  1.00  0.00           C  
ATOM   4383  CD1 ILE D 101       1.680 -20.023-100.795  1.00  0.00           C  
ATOM   4384  N   LYS D 102       4.420 -24.370-100.408  1.00  0.00           N  
ATOM   4385  CA  LYS D 102       5.817 -24.332-100.820  1.00  0.00           C  
ATOM   4386  C   LYS D 102       6.111 -25.323-101.935  1.00  0.00           C  
ATOM   4387  O   LYS D 102       5.907 -26.533-101.788  1.00  0.00           O  
ATOM   4388  CB  LYS D 102       6.731 -24.609 -99.625  1.00  0.00           C  
ATOM   4389  CG  LYS D 102       6.747 -26.062 -99.170  1.00  0.00           C  
ATOM   4390  CD  LYS D 102       7.647 -26.252 -97.958  1.00  0.00           C  
ATOM   4391  CE  LYS D 102       7.753 -27.719 -97.570  1.00  0.00           C  
ATOM   4392  NZ  LYS D 102       6.437 -28.283 -97.163  1.00  0.00           N1+
ATOM   4393  N   GLY D 103       6.604 -24.793-103.051  1.00  0.00           N  
ATOM   4394  CA  GLY D 103       7.008 -25.645-104.146  1.00  0.00           C  
ATOM   4395  C   GLY D 103       5.758 -26.200-104.798  1.00  0.00           C  
ATOM   4396  O   GLY D 103       5.802 -27.223-105.481  1.00  0.00           O  
ATOM   4397  N   LYS D 104       4.627 -25.533-104.586  1.00  0.00           N  
ATOM   4398  CA  LYS D 104       3.378 -26.000-105.172  1.00  0.00           C  
ATOM   4399  C   LYS D 104       2.967 -25.079-106.304  1.00  0.00           C  
ATOM   4400  O   LYS D 104       3.549 -24.009-106.484  1.00  0.00           O  
ATOM   4401  CB  LYS D 104       2.272 -26.075-104.118  1.00  0.00           C  
ATOM   4402  CG  LYS D 104       2.481 -27.151-103.061  1.00  0.00           C  
ATOM   4403  CD  LYS D 104       1.217 -27.379-102.246  1.00  0.00           C  
ATOM   4404  CE  LYS D 104       1.427 -28.449-101.185  1.00  0.00           C  
ATOM   4405  NZ  LYS D 104       0.265 -28.552-100.261  1.00  0.00           N1+
ATOM   4406  N   LYS D 105       1.972 -25.497-107.080  1.00  0.00           N  
ATOM   4407  CA  LYS D 105       1.733 -24.833-108.353  1.00  0.00           C  
ATOM   4408  C   LYS D 105       0.288 -24.679-108.842  1.00  0.00           C  
ATOM   4409  O   LYS D 105      -0.646 -25.228-108.264  1.00  0.00           O  
ATOM   4410  CB  LYS D 105       2.531 -25.569-109.430  1.00  0.00           C  
ATOM   4411  CG  LYS D 105       2.277 -27.070-109.486  1.00  0.00           C  
ATOM   4412  CD  LYS D 105       3.155 -27.740-110.533  1.00  0.00           C  
ATOM   4413  CE  LYS D 105       2.914 -29.242-110.578  1.00  0.00           C  
ATOM   4414  NZ  LYS D 105       3.812 -29.920-111.552  1.00  0.00           N1+
ATOM   4415  N   LEU D 106       0.143 -23.892-109.910  1.00  0.00           N  
ATOM   4416  CA  LEU D 106      -1.139 -23.603-110.534  1.00  0.00           C  
ATOM   4417  C   LEU D 106      -0.956 -23.428-112.051  1.00  0.00           C  
ATOM   4418  O   LEU D 106       0.171 -23.271-112.533  1.00  0.00           O  
ATOM   4419  CB  LEU D 106      -1.755 -22.338-109.924  1.00  0.00           C  
ATOM   4420  CG  LEU D 106      -0.902 -21.067-110.023  1.00  0.00           C  
ATOM   4421  CD1 LEU D 106      -1.135 -20.401-111.372  1.00  0.00           C  
ATOM   4422  CD2 LEU D 106      -1.256 -20.127-108.880  1.00  0.00           C  
ATOM   4423  N   SER D 107      -2.053 -23.468-112.805  1.00  0.00           N  
ATOM   4424  CA  SER D 107      -1.986 -23.217-114.235  1.00  0.00           C  
ATOM   4425  C   SER D 107      -3.071 -22.290-114.718  1.00  0.00           C  
ATOM   4426  O   SER D 107      -4.072 -22.067-114.052  1.00  0.00           O  
ATOM   4427  CB  SER D 107      -2.075 -24.528-114.991  1.00  0.00           C  
ATOM   4428  OG  SER D 107      -1.051 -25.403-114.603  1.00  0.00           O  
ATOM   4429  N   LEU D 108      -2.847 -21.763-115.910  1.00  0.00           N  
ATOM   4430  CA  LEU D 108      -3.839 -21.032-116.662  1.00  0.00           C  
ATOM   4431  C   LEU D 108      -4.044 -21.949-117.838  1.00  0.00           C  
ATOM   4432  O   LEU D 108      -3.115 -22.635-118.249  1.00  0.00           O  
ATOM   4433  CB  LEU D 108      -3.361 -19.639-117.091  1.00  0.00           C  
ATOM   4434  CG  LEU D 108      -2.912 -18.711-115.955  1.00  0.00           C  
ATOM   4435  CD1 LEU D 108      -2.421 -17.393-116.539  1.00  0.00           C  
ATOM   4436  CD2 LEU D 108      -4.070 -18.486-114.995  1.00  0.00           C  
ATOM   4437  N   TRP D 109      -5.261 -22.002-118.359  1.00  0.00           N  
ATOM   4438  CA  TRP D 109      -5.509 -22.781-119.551  1.00  0.00           C  
ATOM   4439  C   TRP D 109      -6.711 -22.177-120.190  1.00  0.00           C  
ATOM   4440  O   TRP D 109      -7.377 -21.340-119.595  1.00  0.00           O  
ATOM   4441  CB  TRP D 109      -5.752 -24.258-119.234  1.00  0.00           C  
ATOM   4442  CG  TRP D 109      -6.944 -24.494-118.357  1.00  0.00           C  
ATOM   4443  CD1 TRP D 109      -8.210 -24.791-118.766  1.00  0.00           C  
ATOM   4444  CD2 TRP D 109      -6.989 -24.454-116.910  1.00  0.00           C  
ATOM   4445  CE2 TRP D 109      -8.306 -24.736-116.536  1.00  0.00           C  
ATOM   4446  CE3 TRP D 109      -6.032 -24.206-115.919  1.00  0.00           C  
ATOM   4447  NE1 TRP D 109      -9.036 -24.937-117.680  1.00  0.00           N  
ATOM   4448  CZ2 TRP D 109      -8.697 -24.776-115.207  1.00  0.00           C  
ATOM   4449  CZ3 TRP D 109      -6.425 -24.248-114.586  1.00  0.00           C  
ATOM   4450  CH2 TRP D 109      -7.723 -24.527-114.240  1.00  0.00           C  
ATOM   4451  N   ALA D 110      -7.001 -22.580-121.410  1.00  0.00           N  
ATOM   4452  CA  ALA D 110      -8.093 -21.959-122.114  1.00  0.00           C  
ATOM   4453  C   ALA D 110      -8.774 -22.921-123.049  1.00  0.00           C  
ATOM   4454  O   ALA D 110      -8.163 -23.854-123.577  1.00  0.00           O  
ATOM   4455  CB  ALA D 110      -7.601 -20.737-122.875  1.00  0.00           C  
ATOM   4456  N   ARG D 111     -10.054 -22.672-123.275  1.00  0.00           N  
ATOM   4457  CA  ARG D 111     -10.811 -23.452-124.223  1.00  0.00           C  
ATOM   4458  C   ARG D 111     -11.148 -22.593-125.420  1.00  0.00           C  
ATOM   4459  O   ARG D 111     -11.230 -21.375-125.320  1.00  0.00           O  
ATOM   4460  CB  ARG D 111     -12.088 -23.988-123.593  1.00  0.00           C  
ATOM   4461  CG  ARG D 111     -11.876 -24.928-122.418  1.00  0.00           C  
ATOM   4462  CD  ARG D 111     -11.279 -26.219-122.848  1.00  0.00           C  
ATOM   4463  NE  ARG D 111     -12.077 -26.870-123.874  1.00  0.00           N  
ATOM   4464  CZ  ARG D 111     -13.141 -27.660-123.629  1.00  0.00           C  
ATOM   4465  NH1 ARG D 111     -13.521 -27.886-122.391  1.00  0.00           N1+
ATOM   4466  NH2 ARG D 111     -13.802 -28.208-124.633  1.00  0.00           N  
ATOM   4467  N   ARG D 112     -11.326 -23.244-126.557  1.00  0.00           N  
ATOM   4468  CA  ARG D 112     -11.617 -22.545-127.800  1.00  0.00           C  
ATOM   4469  C   ARG D 112     -13.067 -22.082-127.800  1.00  0.00           C  
ATOM   4470  O   ARG D 112     -13.983 -22.889-127.668  1.00  0.00           O  
ATOM   4471  CB  ARG D 112     -11.362 -23.443-129.002  1.00  0.00           C  
ATOM   4472  CG  ARG D 112     -11.557 -22.773-130.353  1.00  0.00           C  
ATOM   4473  CD  ARG D 112     -11.421 -23.741-131.471  1.00  0.00           C  
ATOM   4474  NE  ARG D 112     -11.720 -23.131-132.756  1.00  0.00           N  
ATOM   4475  CZ  ARG D 112     -10.802 -22.574-133.571  1.00  0.00           C  
ATOM   4476  NH1 ARG D 112      -9.535 -22.558-133.220  1.00  0.00           N1+
ATOM   4477  NH2 ARG D 112     -11.176 -22.044-134.722  1.00  0.00           N  
ATOM   4478  N   GLU D 113     -13.279 -20.780-127.922  1.00  0.00           N  
ATOM   4479  CA  GLU D 113     -14.636 -20.283-128.056  1.00  0.00           C  
ATOM   4480  C   GLU D 113     -14.940 -20.244-129.540  1.00  0.00           C  
ATOM   4481  O   GLU D 113     -16.098 -20.296-129.954  1.00  0.00           O  
ATOM   4482  CB  GLU D 113     -14.795 -18.896-127.429  1.00  0.00           C  
ATOM   4483  CG  GLU D 113     -14.644 -18.870-125.914  1.00  0.00           C  
ATOM   4484  CD  GLU D 113     -14.809 -17.493-125.333  1.00  0.00           C  
ATOM   4485  OE1 GLU D 113     -14.269 -16.566-125.888  1.00  0.00           O  
ATOM   4486  OE2 GLU D 113     -15.475 -17.369-124.333  1.00  0.00           O1-
ATOM   4487  N   ASN D 114     -13.868 -20.172-130.327  1.00  0.00           N  
ATOM   4488  CA  ASN D 114     -13.935 -20.204-131.781  1.00  0.00           C  
ATOM   4489  C   ASN D 114     -13.943 -18.754-132.238  1.00  0.00           C  
ATOM   4490  O   ASN D 114     -14.991 -18.108-132.284  1.00  0.00           O  
ATOM   4491  CB  ASN D 114     -15.152 -20.961-132.279  1.00  0.00           C  
ATOM   4492  CG  ASN D 114     -15.045 -21.337-133.731  1.00  0.00           C  
ATOM   4493  ND2 ASN D 114     -16.105 -21.128-134.469  1.00  0.00           N  
ATOM   4494  OD1 ASN D 114     -14.000 -21.817-134.185  1.00  0.00           O  
ATOM   4495  N   GLY D 115     -12.759 -18.245-132.555  1.00  0.00           N  
ATOM   4496  CA  GLY D 115     -12.615 -16.826-132.845  1.00  0.00           C  
ATOM   4497  C   GLY D 115     -11.995 -16.135-131.641  1.00  0.00           C  
ATOM   4498  O   GLY D 115     -11.534 -14.994-131.716  1.00  0.00           O  
ATOM   4499  N   SER D 116     -12.001 -16.841-130.516  1.00  0.00           N  
ATOM   4500  CA  SER D 116     -11.451 -16.346-129.261  1.00  0.00           C  
ATOM   4501  C   SER D 116     -11.298 -17.550-128.329  1.00  0.00           C  
ATOM   4502  O   SER D 116     -11.679 -18.668-128.681  1.00  0.00           O  
ATOM   4503  CB  SER D 116     -12.354 -15.296-128.645  1.00  0.00           C  
ATOM   4504  OG  SER D 116     -13.587 -15.848-128.274  1.00  0.00           O  
ATOM   4505  N   VAL D 117     -10.727 -17.322-127.151  1.00  0.00           N  
ATOM   4506  CA  VAL D 117     -10.554 -18.397-126.189  1.00  0.00           C  
ATOM   4507  C   VAL D 117     -11.055 -17.960-124.817  1.00  0.00           C  
ATOM   4508  O   VAL D 117     -11.079 -16.775-124.511  1.00  0.00           O  
ATOM   4509  CB  VAL D 117      -9.071 -18.804-126.095  1.00  0.00           C  
ATOM   4510  CG1 VAL D 117      -8.573 -19.314-127.440  1.00  0.00           C  
ATOM   4511  CG2 VAL D 117      -8.239 -17.622-125.624  1.00  0.00           C  
ATOM   4512  N   LYS D 118     -11.480 -18.926-124.009  1.00  0.00           N  
ATOM   4513  CA  LYS D 118     -11.986 -18.640-122.682  1.00  0.00           C  
ATOM   4514  C   LYS D 118     -10.930 -19.085-121.665  1.00  0.00           C  
ATOM   4515  O   LYS D 118     -10.626 -20.279-121.553  1.00  0.00           O  
ATOM   4516  CB  LYS D 118     -13.320 -19.346-122.438  1.00  0.00           C  
ATOM   4517  CG  LYS D 118     -13.961 -19.032-121.093  1.00  0.00           C  
ATOM   4518  CD  LYS D 118     -15.327 -19.689-120.964  1.00  0.00           C  
ATOM   4519  CE  LYS D 118     -15.950 -19.412-119.604  1.00  0.00           C  
ATOM   4520  NZ  LYS D 118     -17.281 -20.062-119.458  1.00  0.00           N1+
ATOM   4521  N   TRP D 119     -10.372 -18.132-120.926  1.00  0.00           N  
ATOM   4522  CA  TRP D 119      -9.335 -18.455-119.956  1.00  0.00           C  
ATOM   4523  C   TRP D 119      -9.809 -18.830-118.555  1.00  0.00           C  
ATOM   4524  O   TRP D 119     -10.746 -18.242-118.007  1.00  0.00           O  
ATOM   4525  CB  TRP D 119      -8.379 -17.266-119.839  1.00  0.00           C  
ATOM   4526  CG  TRP D 119      -7.403 -17.170-120.972  1.00  0.00           C  
ATOM   4527  CD1 TRP D 119      -7.527 -16.403-122.092  1.00  0.00           C  
ATOM   4528  CD2 TRP D 119      -6.141 -17.868-121.102  1.00  0.00           C  
ATOM   4529  CE2 TRP D 119      -5.576 -17.467-122.316  1.00  0.00           C  
ATOM   4530  CE3 TRP D 119      -5.455 -18.786-120.297  1.00  0.00           C  
ATOM   4531  NE1 TRP D 119      -6.435 -16.575-122.906  1.00  0.00           N  
ATOM   4532  CZ2 TRP D 119      -4.353 -17.953-122.752  1.00  0.00           C  
ATOM   4533  CZ3 TRP D 119      -4.229 -19.272-120.734  1.00  0.00           C  
ATOM   4534  CH2 TRP D 119      -3.692 -18.865-121.930  1.00  0.00           C  
ATOM   4535  N   PHE D 120      -9.123 -19.800-117.975  1.00  0.00           N  
ATOM   4536  CA  PHE D 120      -9.472 -20.310-116.663  1.00  0.00           C  
ATOM   4537  C   PHE D 120      -8.224 -20.241-115.814  1.00  0.00           C  
ATOM   4538  O   PHE D 120      -7.115 -20.305-116.333  1.00  0.00           O  
ATOM   4539  CB  PHE D 120      -9.997 -21.745-116.737  1.00  0.00           C  
ATOM   4540  CG  PHE D 120     -11.203 -21.905-117.619  1.00  0.00           C  
ATOM   4541  CD1 PHE D 120     -11.062 -22.247-118.955  1.00  0.00           C  
ATOM   4542  CD2 PHE D 120     -12.480 -21.713-117.114  1.00  0.00           C  
ATOM   4543  CE1 PHE D 120     -12.171 -22.395-119.767  1.00  0.00           C  
ATOM   4544  CE2 PHE D 120     -13.590 -21.860-117.922  1.00  0.00           C  
ATOM   4545  CZ  PHE D 120     -13.435 -22.202-119.251  1.00  0.00           C  
ATOM   4546  N   CYS D 121      -8.415 -20.106-114.507  1.00  0.00           N  
ATOM   4547  CA  CYS D 121      -7.304 -19.992-113.570  1.00  0.00           C  
ATOM   4548  C   CYS D 121      -7.589 -20.932-112.409  1.00  0.00           C  
ATOM   4549  O   CYS D 121      -8.613 -20.803-111.735  1.00  0.00           O  
ATOM   4550  CB  CYS D 121      -7.140 -18.560-113.060  1.00  0.00           C  
ATOM   4551  SG  CYS D 121      -5.749 -18.334-111.926  1.00  0.00           S  
ATOM   4552  N   GLY D 122      -6.697 -21.883-112.175  1.00  0.00           N  
ATOM   4553  CA  GLY D 122      -6.948 -22.854-111.129  1.00  0.00           C  
ATOM   4554  C   GLY D 122      -5.791 -23.797-110.879  1.00  0.00           C  
ATOM   4555  O   GLY D 122      -4.643 -23.439-111.072  1.00  0.00           O  
ATOM   4556  N   GLN D 123      -6.106 -25.006-110.434  1.00  0.00           N  
ATOM   4557  CA  GLN D 123      -5.085 -25.999-110.125  1.00  0.00           C  
ATOM   4558  C   GLN D 123      -4.433 -26.471-111.412  1.00  0.00           C  
ATOM   4559  O   GLN D 123      -4.992 -26.296-112.489  1.00  0.00           O  
ATOM   4560  CB  GLN D 123      -5.685 -27.186-109.366  1.00  0.00           C  
ATOM   4561  CG  GLN D 123      -6.137 -26.857-107.953  1.00  0.00           C  
ATOM   4562  CD  GLN D 123      -6.557 -28.091-107.178  1.00  0.00           C  
ATOM   4563  NE2 GLN D 123      -6.195 -28.138-105.901  1.00  0.00           N  
ATOM   4564  OE1 GLN D 123      -7.200 -28.994-107.721  1.00  0.00           O  
ATOM   4565  N   PRO D 124      -3.253 -27.103-111.305  1.00  0.00           N  
ATOM   4566  CA  PRO D 124      -2.413 -27.545-112.425  1.00  0.00           C  
ATOM   4567  C   PRO D 124      -3.093 -28.426-113.444  1.00  0.00           C  
ATOM   4568  O   PRO D 124      -3.786 -29.373-113.090  1.00  0.00           O  
ATOM   4569  CB  PRO D 124      -1.300 -28.316-111.709  1.00  0.00           C  
ATOM   4570  CG  PRO D 124      -1.151 -27.615-110.402  1.00  0.00           C  
ATOM   4571  CD  PRO D 124      -2.561 -27.268-110.001  1.00  0.00           C  
ATOM   4572  N   VAL D 125      -2.873 -28.114-114.716  1.00  0.00           N  
ATOM   4573  CA  VAL D 125      -3.432 -28.909-115.792  1.00  0.00           C  
ATOM   4574  C   VAL D 125      -2.367 -29.168-116.864  1.00  0.00           C  
ATOM   4575  O   VAL D 125      -1.274 -28.611-116.822  1.00  0.00           O  
ATOM   4576  CB  VAL D 125      -4.641 -28.188-116.417  1.00  0.00           C  
ATOM   4577  CG1 VAL D 125      -5.712 -27.935-115.367  1.00  0.00           C  
ATOM   4578  CG2 VAL D 125      -4.192 -26.882-117.055  1.00  0.00           C  
ATOM   4579  N   THR D 126      -2.685 -30.029-117.820  1.00  0.00           N  
ATOM   4580  CA  THR D 126      -1.793 -30.271-118.948  1.00  0.00           C  
ATOM   4581  C   THR D 126      -2.660 -30.369-120.183  1.00  0.00           C  
ATOM   4582  O   THR D 126      -3.781 -30.836-120.086  1.00  0.00           O  
ATOM   4583  CB  THR D 126      -0.957 -31.551-118.772  1.00  0.00           C  
ATOM   4584  CG2 THR D 126      -1.860 -32.773-118.704  1.00  0.00           C  
ATOM   4585  OG1 THR D 126      -0.052 -31.690-119.875  1.00  0.00           O  
ATOM   4586  N   ARG D 127      -2.177 -29.936-121.341  1.00  0.00           N  
ATOM   4587  CA  ARG D 127      -3.046 -29.989-122.504  1.00  0.00           C  
ATOM   4588  C   ARG D 127      -2.895 -31.333-123.207  1.00  0.00           C  
ATOM   4589  O   ARG D 127      -1.793 -31.854-123.365  1.00  0.00           O  
ATOM   4590  CB  ARG D 127      -2.723 -28.862-123.473  1.00  0.00           C  
ATOM   4591  CG  ARG D 127      -3.641 -28.776-124.682  1.00  0.00           C  
ATOM   4592  CD  ARG D 127      -3.410 -27.531-125.459  1.00  0.00           C  
ATOM   4593  NE  ARG D 127      -3.769 -26.344-124.699  1.00  0.00           N  
ATOM   4594  CZ  ARG D 127      -5.028 -25.896-124.529  1.00  0.00           C  
ATOM   4595  NH1 ARG D 127      -6.036 -26.545-125.069  1.00  0.00           N1+
ATOM   4596  NH2 ARG D 127      -5.251 -24.804-123.819  1.00  0.00           N  
ATOM   4597  N   THR D 128      -4.024 -31.898-123.611  1.00  0.00           N  
ATOM   4598  CA  THR D 128      -4.041 -33.177-124.282  1.00  0.00           C  
ATOM   4599  C   THR D 128      -4.031 -32.901-125.774  1.00  0.00           C  
ATOM   4600  O   THR D 128      -3.196 -33.442-126.499  1.00  0.00           O  
ATOM   4601  CB  THR D 128      -5.268 -34.021-123.891  1.00  0.00           C  
ATOM   4602  CG2 THR D 128      -5.273 -35.339-124.649  1.00  0.00           C  
ATOM   4603  OG1 THR D 128      -5.242 -34.284-122.482  1.00  0.00           O  
ATOM   4604  N   ASP D 129      -4.946 -32.056-126.227  1.00  0.00           N  
ATOM   4605  CA  ASP D 129      -5.069 -31.761-127.645  1.00  0.00           C  
ATOM   4606  C   ASP D 129      -5.526 -30.299-127.799  1.00  0.00           C  
ATOM   4607  O   ASP D 129      -5.539 -29.546-126.823  1.00  0.00           O  
ATOM   4608  CB  ASP D 129      -6.061 -32.711-128.319  1.00  0.00           C  
ATOM   4609  CG  ASP D 129      -7.491 -32.518-127.833  1.00  0.00           C  
ATOM   4610  OD1 ASP D 129      -7.896 -31.391-127.672  1.00  0.00           O  
ATOM   4611  OD2 ASP D 129      -8.165 -33.499-127.627  1.00  0.00           O1-
ATOM   4612  N   ASP D 130      -5.902 -29.897-129.006  1.00  0.00           N  
ATOM   4613  CA  ASP D 130      -6.180 -28.485-129.260  1.00  0.00           C  
ATOM   4614  C   ASP D 130      -7.312 -27.878-128.449  1.00  0.00           C  
ATOM   4615  O   ASP D 130      -7.385 -26.667-128.271  1.00  0.00           O  
ATOM   4616  CB  ASP D 130      -6.490 -28.289-130.746  1.00  0.00           C  
ATOM   4617  CG  ASP D 130      -5.266 -28.468-131.635  1.00  0.00           C  
ATOM   4618  OD1 ASP D 130      -4.177 -28.508-131.113  1.00  0.00           O  
ATOM   4619  OD2 ASP D 130      -5.432 -28.563-132.828  1.00  0.00           O1-
ATOM   4620  N   ASP D 131      -8.186 -28.717-127.934  1.00  0.00           N  
ATOM   4621  CA  ASP D 131      -9.269 -28.205-127.120  1.00  0.00           C  
ATOM   4622  C   ASP D 131      -9.553 -29.099-125.917  1.00  0.00           C  
ATOM   4623  O   ASP D 131     -10.672 -29.129-125.401  1.00  0.00           O  
ATOM   4624  CB  ASP D 131     -10.537 -28.059-127.965  1.00  0.00           C  
ATOM   4625  CG  ASP D 131     -11.614 -27.230-127.277  1.00  0.00           C  
ATOM   4626  OD1 ASP D 131     -11.273 -26.271-126.626  1.00  0.00           O  
ATOM   4627  OD2 ASP D 131     -12.767 -27.563-127.411  1.00  0.00           O1-
ATOM   4628  N   THR D 132      -8.528 -29.804-125.455  1.00  0.00           N  
ATOM   4629  CA  THR D 132      -8.675 -30.645-124.290  1.00  0.00           C  
ATOM   4630  C   THR D 132      -7.510 -30.493-123.327  1.00  0.00           C  
ATOM   4631  O   THR D 132      -6.355 -30.516-123.735  1.00  0.00           O  
ATOM   4632  CB  THR D 132      -8.816 -32.123-124.698  1.00  0.00           C  
ATOM   4633  CG2 THR D 132      -9.031 -32.997-123.472  1.00  0.00           C  
ATOM   4634  OG1 THR D 132      -9.931 -32.271-125.588  1.00  0.00           O  
ATOM   4635  N   VAL D 133      -7.837 -30.345-122.047  1.00  0.00           N  
ATOM   4636  CA  VAL D 133      -6.855 -30.233-120.982  1.00  0.00           C  
ATOM   4637  C   VAL D 133      -7.211 -31.287-119.941  1.00  0.00           C  
ATOM   4638  O   VAL D 133      -8.327 -31.783-119.938  1.00  0.00           O  
ATOM   4639  CB  VAL D 133      -6.866 -28.828-120.352  1.00  0.00           C  
ATOM   4640  CG1 VAL D 133      -6.517 -27.775-121.393  1.00  0.00           C  
ATOM   4641  CG2 VAL D 133      -8.228 -28.547-119.737  1.00  0.00           C  
ATOM   4642  N   ALA D 134      -6.281 -31.628-119.061  1.00  0.00           N  
ATOM   4643  CA  ALA D 134      -6.546 -32.643-118.037  1.00  0.00           C  
ATOM   4644  C   ALA D 134      -5.873 -32.275-116.739  1.00  0.00           C  
ATOM   4645  O   ALA D 134      -4.914 -31.500-116.723  1.00  0.00           O  
ATOM   4646  CB  ALA D 134      -6.084 -34.017-118.501  1.00  0.00           C  
ATOM   4647  N   ASP D 135      -6.387 -32.832-115.649  1.00  0.00           N  
ATOM   4648  CA  ASP D 135      -5.855 -32.570-114.332  1.00  0.00           C  
ATOM   4649  C   ASP D 135      -4.462 -33.133-114.174  1.00  0.00           C  
ATOM   4650  O   ASP D 135      -4.271 -34.346-114.145  1.00  0.00           O  
ATOM   4651  CB  ASP D 135      -6.773 -33.159-113.258  1.00  0.00           C  
ATOM   4652  CG  ASP D 135      -6.322 -32.821-111.844  1.00  0.00           C  
ATOM   4653  OD1 ASP D 135      -5.232 -32.323-111.691  1.00  0.00           O  
ATOM   4654  OD2 ASP D 135      -7.072 -33.065-110.929  1.00  0.00           O1-
ATOM   4655  N   ALA D 136      -3.487 -32.244-114.092  1.00  0.00           N  
ATOM   4656  CA  ALA D 136      -2.109 -32.668-114.013  1.00  0.00           C  
ATOM   4657  C   ALA D 136      -1.936 -32.954-112.530  1.00  0.00           C  
ATOM   4658  O   ALA D 136      -1.399 -32.128-111.794  1.00  0.00           O  
ATOM   4659  CB  ALA D 136      -1.140 -31.613-114.528  1.00  0.00           C  
ATOM   4660  N   LYS D 137      -2.437 -34.111-112.091  1.00  0.00           N  
ATOM   4661  CA  LYS D 137      -2.338 -34.527-110.689  1.00  0.00           C  
ATOM   4662  C   LYS D 137      -0.968 -35.144-110.421  1.00  0.00           C  
ATOM   4663  O   LYS D 137      -0.579 -36.131-111.053  1.00  0.00           O  
ATOM   4664  CB  LYS D 137      -3.445 -35.521-110.336  1.00  0.00           C  
ATOM   4665  CG  LYS D 137      -3.467 -35.945-108.873  1.00  0.00           C  
ATOM   4666  CD  LYS D 137      -4.626 -36.889-108.589  1.00  0.00           C  
ATOM   4667  CE  LYS D 137      -4.641 -37.324-107.131  1.00  0.00           C  
ATOM   4668  NZ  LYS D 137      -5.771 -38.247-106.837  1.00  0.00           N1+
ATOM   4669  N   ASP D 138      -0.232 -34.568-109.481  1.00  0.00           N  
ATOM   4670  CA  ASP D 138       1.059 -35.135-109.123  1.00  0.00           C  
ATOM   4671  C   ASP D 138       1.443 -34.851-107.674  1.00  0.00           C  
ATOM   4672  O   ASP D 138       2.519 -35.252-107.232  1.00  0.00           O  
ATOM   4673  CB  ASP D 138       2.146 -34.591-110.054  1.00  0.00           C  
ATOM   4674  CG  ASP D 138       2.332 -33.084-109.932  1.00  0.00           C  
ATOM   4675  OD1 ASP D 138       1.802 -32.513-109.008  1.00  0.00           O  
ATOM   4676  OD2 ASP D 138       3.001 -32.519-110.763  1.00  0.00           O1-
ATOM   4677  N   GLY D 139       0.574 -34.149-106.950  1.00  0.00           N  
ATOM   4678  CA  GLY D 139       0.818 -33.887-105.537  1.00  0.00           C  
ATOM   4679  C   GLY D 139       1.290 -32.499-105.129  1.00  0.00           C  
ATOM   4680  O   GLY D 139       1.375 -32.208-103.935  1.00  0.00           O  
ATOM   4681  N   LYS D 140       1.591 -31.635-106.091  1.00  0.00           N  
ATOM   4682  CA  LYS D 140       2.028 -30.282-105.767  1.00  0.00           C  
ATOM   4683  C   LYS D 140       0.960 -29.204-106.086  1.00  0.00           C  
ATOM   4684  O   LYS D 140       1.280 -28.036-106.318  1.00  0.00           O  
ATOM   4685  CB  LYS D 140       3.325 -29.970-106.515  1.00  0.00           C  
ATOM   4686  CG  LYS D 140       4.487 -30.893-106.169  1.00  0.00           C  
ATOM   4687  CD  LYS D 140       4.900 -30.739-104.713  1.00  0.00           C  
ATOM   4688  CE  LYS D 140       6.107 -31.607-104.385  1.00  0.00           C  
ATOM   4689  NZ  LYS D 140       6.491 -31.505-102.951  1.00  0.00           N1+
ATOM   4690  N   GLU D 141      -0.305 -29.595-106.082  1.00  0.00           N  
ATOM   4691  CA  GLU D 141      -1.374 -28.643-106.356  1.00  0.00           C  
ATOM   4692  C   GLU D 141      -1.618 -27.711-105.183  1.00  0.00           C  
ATOM   4693  O   GLU D 141      -1.672 -28.154-104.042  1.00  0.00           O  
ATOM   4694  CB  GLU D 141      -2.668 -29.384-106.700  1.00  0.00           C  
ATOM   4695  CG  GLU D 141      -2.528 -30.409-107.816  1.00  0.00           C  
ATOM   4696  CD  GLU D 141      -2.004 -31.733-107.333  1.00  0.00           C  
ATOM   4697  OE1 GLU D 141      -2.119 -32.004-106.162  1.00  0.00           O  
ATOM   4698  OE2 GLU D 141      -1.488 -32.474-108.136  1.00  0.00           O1-
ATOM   4699  N   ILE D 142      -1.765 -26.420-105.462  1.00  0.00           N  
ATOM   4700  CA  ILE D 142      -2.069 -25.472-104.411  1.00  0.00           C  
ATOM   4701  C   ILE D 142      -3.523 -25.734-104.022  1.00  0.00           C  
ATOM   4702  O   ILE D 142      -4.392 -25.828-104.873  1.00  0.00           O  
ATOM   4703  CB  ILE D 142      -1.872 -24.015-104.868  1.00  0.00           C  
ATOM   4704  CG1 ILE D 142      -0.397 -23.747-105.176  1.00  0.00           C  
ATOM   4705  CG2 ILE D 142      -2.381 -23.052-103.806  1.00  0.00           C  
ATOM   4706  CD1 ILE D 142      -0.147 -22.424-105.864  1.00  0.00           C  
ATOM   4707  N   ASP D 143      -3.750 -25.855-102.724  1.00  0.00           N  
ATOM   4708  CA  ASP D 143      -5.056 -26.062-102.120  1.00  0.00           C  
ATOM   4709  C   ASP D 143      -6.008 -24.895-102.280  1.00  0.00           C  
ATOM   4710  O   ASP D 143      -5.597 -23.736-102.238  1.00  0.00           O  
ATOM   4711  CB  ASP D 143      -4.893 -26.366-100.629  1.00  0.00           C  
ATOM   4712  CG  ASP D 143      -6.183 -26.846 -99.978  1.00  0.00           C  
ATOM   4713  OD1 ASP D 143      -6.372 -28.036 -99.885  1.00  0.00           O  
ATOM   4714  OD2 ASP D 143      -6.968 -26.018 -99.580  1.00  0.00           O1-
ATOM   4715  N   THR D 144      -7.286 -25.194-102.445  1.00  0.00           N  
ATOM   4716  CA  THR D 144      -8.280 -24.139-102.623  1.00  0.00           C  
ATOM   4717  C   THR D 144      -8.251 -23.044-101.551  1.00  0.00           C  
ATOM   4718  O   THR D 144      -8.483 -21.873-101.847  1.00  0.00           O  
ATOM   4719  CB  THR D 144      -9.692 -24.751-102.672  1.00  0.00           C  
ATOM   4720  CG2 THR D 144     -10.741 -23.659-102.821  1.00  0.00           C  
ATOM   4721  OG1 THR D 144      -9.787 -25.654-103.781  1.00  0.00           O  
ATOM   4722  N   LYS D 145      -7.964 -23.411-100.311  1.00  0.00           N  
ATOM   4723  CA  LYS D 145      -7.941 -22.412 -99.255  1.00  0.00           C  
ATOM   4724  C   LYS D 145      -6.902 -21.320 -99.457  1.00  0.00           C  
ATOM   4725  O   LYS D 145      -7.034 -20.236 -98.897  1.00  0.00           O  
ATOM   4726  CB  LYS D 145      -7.704 -23.094 -97.906  1.00  0.00           C  
ATOM   4727  CG  LYS D 145      -8.872 -23.940 -97.416  1.00  0.00           C  
ATOM   4728  CD  LYS D 145      -8.560 -24.590 -96.076  1.00  0.00           C  
ATOM   4729  CE  LYS D 145      -9.727 -25.432 -95.583  1.00  0.00           C  
ATOM   4730  NZ  LYS D 145      -9.422 -26.104 -94.291  1.00  0.00           N1+
ATOM   4731  N   HIS D 146      -5.885 -21.587-100.270  1.00  0.00           N  
ATOM   4732  CA  HIS D 146      -4.876 -20.573-100.566  1.00  0.00           C  
ATOM   4733  C   HIS D 146      -5.038 -19.924-101.929  1.00  0.00           C  
ATOM   4734  O   HIS D 146      -4.175 -19.162-102.375  1.00  0.00           O  
ATOM   4735  CB  HIS D 146      -3.474 -21.185-100.471  1.00  0.00           C  
ATOM   4736  CG  HIS D 146      -3.127 -21.682 -99.102  1.00  0.00           C  
ATOM   4737  CD2 HIS D 146      -3.005 -22.939 -98.614  1.00  0.00           C  
ATOM   4738  ND1 HIS D 146      -2.855 -20.833 -98.049  1.00  0.00           N  
ATOM   4739  CE1 HIS D 146      -2.582 -21.548 -96.971  1.00  0.00           C  
ATOM   4740  NE2 HIS D 146      -2.666 -22.827 -97.288  1.00  0.00           N  
ATOM   4741  N   LEU D 147      -6.149 -20.201-102.591  1.00  0.00           N  
ATOM   4742  CA  LEU D 147      -6.396 -19.596-103.886  1.00  0.00           C  
ATOM   4743  C   LEU D 147      -7.372 -18.430-103.856  1.00  0.00           C  
ATOM   4744  O   LEU D 147      -8.435 -18.502-103.235  1.00  0.00           O  
ATOM   4745  CB  LEU D 147      -6.923 -20.666-104.851  1.00  0.00           C  
ATOM   4746  CG  LEU D 147      -5.984 -21.852-105.106  1.00  0.00           C  
ATOM   4747  CD1 LEU D 147      -6.678 -22.866-106.005  1.00  0.00           C  
ATOM   4748  CD2 LEU D 147      -4.694 -21.352-105.740  1.00  0.00           C  
ATOM   4749  N   PRO D 148      -7.013 -17.330-104.528  1.00  0.00           N  
ATOM   4750  CA  PRO D 148      -7.887 -16.172-104.709  1.00  0.00           C  
ATOM   4751  C   PRO D 148      -9.212 -16.616-105.317  1.00  0.00           C  
ATOM   4752  O   PRO D 148      -9.317 -17.692-105.900  1.00  0.00           O  
ATOM   4753  CB  PRO D 148      -7.094 -15.274-105.664  1.00  0.00           C  
ATOM   4754  CG  PRO D 148      -5.673 -15.656-105.429  1.00  0.00           C  
ATOM   4755  CD  PRO D 148      -5.716 -17.144-105.208  1.00  0.00           C  
ATOM   4756  N   SER D 149     -10.216 -15.766-105.193  1.00  0.00           N  
ATOM   4757  CA  SER D 149     -11.552 -16.089-105.674  1.00  0.00           C  
ATOM   4758  C   SER D 149     -11.480 -16.167-107.211  1.00  0.00           C  
ATOM   4759  O   SER D 149     -12.317 -16.796-107.864  1.00  0.00           O  
ATOM   4760  CB  SER D 149     -12.557 -15.044-105.229  1.00  0.00           C  
ATOM   4761  OG  SER D 149     -12.324 -13.819-105.868  1.00  0.00           O  
ATOM   4762  N   THR D 150     -10.464 -15.521-107.778  1.00  0.00           N  
ATOM   4763  CA  THR D 150     -10.246 -15.551-109.211  1.00  0.00           C  
ATOM   4764  C   THR D 150      -9.529 -16.806-109.657  1.00  0.00           C  
ATOM   4765  O   THR D 150      -9.360 -17.012-110.850  1.00  0.00           O  
ATOM   4766  CB  THR D 150      -9.445 -14.318-109.668  1.00  0.00           C  
ATOM   4767  CG2 THR D 150     -10.177 -13.038-109.296  1.00  0.00           C  
ATOM   4768  OG1 THR D 150      -8.154 -14.325-109.045  1.00  0.00           O  
ATOM   4769  N   CYS D 151      -9.083 -17.641-108.723  1.00  0.00           N  
ATOM   4770  CA  CYS D 151      -8.372 -18.851-109.124  1.00  0.00           C  
ATOM   4771  C   CYS D 151      -9.047 -20.075-108.544  1.00  0.00           C  
ATOM   4772  O   CYS D 151      -8.494 -20.767-107.697  1.00  0.00           O  
ATOM   4773  CB  CYS D 151      -6.915 -18.809-108.661  1.00  0.00           C  
ATOM   4774  SG  CYS D 151      -5.933 -20.236-109.183  1.00  0.00           S  
ATOM   4775  N   ARG D 152     -10.260 -20.334-109.018  1.00  0.00           N  
ATOM   4776  CA  ARG D 152     -11.098 -21.398-108.474  1.00  0.00           C  
ATOM   4777  C   ARG D 152     -11.657 -22.243-109.606  1.00  0.00           C  
ATOM   4778  O   ARG D 152     -12.724 -22.815-109.449  1.00  0.00           O  
ATOM   4779  CB  ARG D 152     -12.243 -20.826-107.651  1.00  0.00           C  
ATOM   4780  CG  ARG D 152     -11.816 -19.944-106.489  1.00  0.00           C  
ATOM   4781  CD  ARG D 152     -11.123 -20.725-105.433  1.00  0.00           C  
ATOM   4782  NE  ARG D 152     -10.748 -19.892-104.301  1.00  0.00           N  
ATOM   4783  CZ  ARG D 152     -11.562 -19.590-103.271  1.00  0.00           C  
ATOM   4784  NH1 ARG D 152     -12.790 -20.057-103.244  1.00  0.00           N1+
ATOM   4785  NH2 ARG D 152     -11.125 -18.823-102.287  1.00  0.00           N  
ATOM   4786  N   ASP D 153     -10.962 -22.329-110.739  1.00  0.00           N  
ATOM   4787  CA  ASP D 153     -11.476 -23.093-111.880  1.00  0.00           C  
ATOM   4788  C   ASP D 153     -11.014 -24.558-112.017  1.00  0.00           C  
ATOM   4789  O   ASP D 153      -9.909 -24.920-111.629  1.00  0.00           O  
ATOM   4790  CB  ASP D 153     -11.110 -22.350-113.167  1.00  0.00           C  
ATOM   4791  CG  ASP D 153     -11.817 -21.008-113.298  1.00  0.00           C  
ATOM   4792  OD1 ASP D 153     -12.954 -20.916-112.901  1.00  0.00           O  
ATOM   4793  OD2 ASP D 153     -11.212 -20.087-113.794  1.00  0.00           O1-
ATOM   4794  N   ASN D 154     -11.882 -25.379-112.593  1.00  0.00           N  
ATOM   4795  CA  ASN D 154     -11.605 -26.793-112.860  1.00  0.00           C  
ATOM   4796  C   ASN D 154     -11.259 -27.021-114.336  1.00  0.00           C  
ATOM   4797  O   ASN D 154     -11.768 -26.342-115.228  1.00  0.00           O  
ATOM   4798  CB  ASN D 154     -12.785 -27.655-112.448  1.00  0.00           C  
ATOM   4799  CG  ASN D 154     -13.018 -27.644-110.963  1.00  0.00           C  
ATOM   4800  ND2 ASN D 154     -14.263 -27.577-110.568  1.00  0.00           N  
ATOM   4801  OD1 ASN D 154     -12.068 -27.695-110.172  1.00  0.00           O  
ATOM   4802  N   PHE D 155     -10.391 -27.991-114.580  1.00  0.00           N  
ATOM   4803  CA  PHE D 155      -9.920 -28.276-115.919  1.00  0.00           C  
ATOM   4804  C   PHE D 155     -11.060 -28.623-116.888  1.00  0.00           C  
ATOM   4805  O   PHE D 155     -10.943 -28.417-118.102  1.00  0.00           O  
ATOM   4806  CB  PHE D 155      -8.913 -29.426-115.878  1.00  0.00           C  
ATOM   4807  CG  PHE D 155      -9.546 -30.782-115.751  1.00  0.00           C  
ATOM   4808  CD1 PHE D 155      -9.852 -31.529-116.880  1.00  0.00           C  
ATOM   4809  CD2 PHE D 155      -9.839 -31.314-114.505  1.00  0.00           C  
ATOM   4810  CE1 PHE D 155     -10.435 -32.776-116.765  1.00  0.00           C  
ATOM   4811  CE2 PHE D 155     -10.421 -32.561-114.387  1.00  0.00           C  
ATOM   4812  CZ  PHE D 155     -10.719 -33.293-115.519  1.00  0.00           C  
ATOM   4813  N   ASP D 156     -12.172 -29.144-116.372  1.00  0.00           N  
ATOM   4814  CA  ASP D 156     -13.296 -29.466-117.256  1.00  0.00           C  
ATOM   4815  C   ASP D 156     -14.319 -28.349-117.459  1.00  0.00           C  
ATOM   4816  O   ASP D 156     -15.402 -28.582-117.992  1.00  0.00           O  
ATOM   4817  CB  ASP D 156     -14.024 -30.701-116.718  1.00  0.00           C  
ATOM   4818  CG  ASP D 156     -14.646 -30.472-115.347  1.00  0.00           C  
ATOM   4819  OD1 ASP D 156     -14.464 -29.408-114.804  1.00  0.00           O  
ATOM   4820  OD2 ASP D 156     -15.298 -31.362-114.857  1.00  0.00           O1-
ATOM   4821  N   ALA D 157     -13.982 -27.140-117.032  1.00  0.00           N  
ATOM   4822  CA  ALA D 157     -14.881 -26.018-117.221  1.00  0.00           C  
ATOM   4823  C   ALA D 157     -14.877 -25.648-118.699  1.00  0.00           C  
ATOM   4824  O   ALA D 157     -13.875 -25.829-119.385  1.00  0.00           O  
ATOM   4825  CB  ALA D 157     -14.473 -24.837-116.352  1.00  0.00           C  
ATOM   4826  N   LYS D 158     -15.995 -25.146-119.206  1.00  0.00           N  
ATOM   4827  CA  LYS D 158     -16.053 -24.811-120.621  1.00  0.00           C  
ATOM   4828  C   LYS D 158     -16.592 -23.401-120.748  1.00  0.00           C  
ATOM   4829  O   LYS D 158     -17.208 -22.939-119.767  1.00  0.00           O  
ATOM   4830  CB  LYS D 158     -16.927 -25.800-121.396  1.00  0.00           C  
ATOM   4831  CG  LYS D 158     -17.002 -25.533-122.893  1.00  0.00           C  
ATOM   4832  CD  LYS D 158     -17.865 -26.571-123.596  1.00  0.00           C  
ATOM   4833  CE  LYS D 158     -17.964 -26.290-125.088  1.00  0.00           C  
ATOM   4834  NZ  LYS D 158     -18.823 -27.284-125.786  1.00  0.00           N1+
ATOM   4835  OXT LYS D 158     -16.419 -22.781-121.760  1.00  0.00           O1-
TER    4836      LYS D 158 
ATOM   4837  N   PHE E   1       9.197   1.904 -42.946  1.00  0.00           N  
ATOM   4838  CA  PHE E   1       8.132   1.472 -41.991  1.00  0.00           C  
ATOM   4839  C   PHE E   1       6.878   0.936 -42.689  1.00  0.00           C  
ATOM   4840  O   PHE E   1       6.231   0.021 -42.177  1.00  0.00           O  
ATOM   4841  CB  PHE E   1       7.730   2.636 -41.082  1.00  0.00           C  
ATOM   4842  CG  PHE E   1       8.830   3.104 -40.173  1.00  0.00           C  
ATOM   4843  CD1 PHE E   1      10.064   2.470 -40.171  1.00  0.00           C  
ATOM   4844  CD2 PHE E   1       8.635   4.178 -39.319  1.00  0.00           C  
ATOM   4845  CE1 PHE E   1      11.077   2.899 -39.335  1.00  0.00           C  
ATOM   4846  CE2 PHE E   1       9.646   4.610 -38.483  1.00  0.00           C  
ATOM   4847  CZ  PHE E   1      10.869   3.969 -38.491  1.00  0.00           C  
ATOM   4848  N   THR E   2       6.551   1.487 -43.864  1.00  0.00           N  
ATOM   4849  CA  THR E   2       5.375   1.038 -44.625  1.00  0.00           C  
ATOM   4850  C   THR E   2       5.379   1.275 -46.144  1.00  0.00           C  
ATOM   4851  O   THR E   2       5.428   0.328 -46.934  1.00  0.00           O  
ATOM   4852  CB  THR E   2       4.112   1.700 -44.043  1.00  0.00           C  
ATOM   4853  CG2 THR E   2       2.880   1.284 -44.833  1.00  0.00           C  
ATOM   4854  OG1 THR E   2       3.952   1.308 -42.674  1.00  0.00           O  
ATOM   4855  N   LEU E   3       5.316   2.551 -46.526  1.00  0.00           N  
ATOM   4856  CA  LEU E   3       5.215   2.974 -47.927  1.00  0.00           C  
ATOM   4857  C   LEU E   3       6.479   2.761 -48.766  1.00  0.00           C  
ATOM   4858  O   LEU E   3       7.174   3.724 -49.113  1.00  0.00           O  
ATOM   4859  CB  LEU E   3       4.836   4.459 -47.976  1.00  0.00           C  
ATOM   4860  CG  LEU E   3       4.649   5.052 -49.379  1.00  0.00           C  
ATOM   4861  CD1 LEU E   3       3.479   4.364 -50.069  1.00  0.00           C  
ATOM   4862  CD2 LEU E   3       4.414   6.551 -49.269  1.00  0.00           C  
ATOM   4863  N   ILE E   4       6.768   1.504 -49.101  1.00  0.00           N  
ATOM   4864  CA  ILE E   4       7.881   1.198 -50.001  1.00  0.00           C  
ATOM   4865  C   ILE E   4       7.441   0.418 -51.252  1.00  0.00           C  
ATOM   4866  O   ILE E   4       8.147   0.408 -52.262  1.00  0.00           O  
ATOM   4867  CB  ILE E   4       8.963   0.394 -49.257  1.00  0.00           C  
ATOM   4868  CG1 ILE E   4       8.400  -0.949 -48.784  1.00  0.00           C  
ATOM   4869  CG2 ILE E   4       9.504   1.192 -48.081  1.00  0.00           C  
ATOM   4870  CD1 ILE E   4       9.449  -1.898 -48.251  1.00  0.00           C  
ATOM   4871  N   GLU E   5       6.270  -0.213 -51.177  1.00  0.00           N  
ATOM   4872  CA  GLU E   5       5.742  -1.024 -52.271  1.00  0.00           C  
ATOM   4873  C   GLU E   5       5.341  -0.150 -53.461  1.00  0.00           C  
ATOM   4874  O   GLU E   5       5.585  -0.510 -54.611  1.00  0.00           O  
ATOM   4875  CB  GLU E   5       4.539  -1.842 -51.796  1.00  0.00           C  
ATOM   4876  CG  GLU E   5       4.883  -2.951 -50.811  1.00  0.00           C  
ATOM   4877  CD  GLU E   5       3.672  -3.702 -50.331  1.00  0.00           C  
ATOM   4878  OE1 GLU E   5       2.580  -3.276 -50.617  1.00  0.00           O  
ATOM   4879  OE2 GLU E   5       3.841  -4.704 -49.676  1.00  0.00           O1-
ATOM   4880  N   LEU E   6       4.727   0.996 -53.172  1.00  0.00           N  
ATOM   4881  CA  LEU E   6       4.375   1.975 -54.199  1.00  0.00           C  
ATOM   4882  C   LEU E   6       5.611   2.423 -54.976  1.00  0.00           C  
ATOM   4883  O   LEU E   6       5.603   2.442 -56.207  1.00  0.00           O  
ATOM   4884  CB  LEU E   6       3.695   3.193 -53.562  1.00  0.00           C  
ATOM   4885  CG  LEU E   6       3.279   4.306 -54.531  1.00  0.00           C  
ATOM   4886  CD1 LEU E   6       2.247   3.766 -55.513  1.00  0.00           C  
ATOM   4887  CD2 LEU E   6       2.722   5.483 -53.745  1.00  0.00           C  
ATOM   4888  N   MET E   7       6.669   2.773 -54.244  1.00  0.00           N  
ATOM   4889  CA  MET E   7       7.960   3.125 -54.834  1.00  0.00           C  
ATOM   4890  C   MET E   7       8.522   2.029 -55.745  1.00  0.00           C  
ATOM   4891  O   MET E   7       8.927   2.310 -56.872  1.00  0.00           O  
ATOM   4892  CB  MET E   7       8.960   3.447 -53.725  1.00  0.00           C  
ATOM   4893  CG  MET E   7      10.370   3.743 -54.215  1.00  0.00           C  
ATOM   4894  SD  MET E   7      11.549   3.939 -52.863  1.00  0.00           S  
ATOM   4895  CE  MET E   7      11.625   2.264 -52.235  1.00  0.00           C  
ATOM   4896  N   ILE E   8       8.555   0.792 -55.251  1.00  0.00           N  
ATOM   4897  CA  ILE E   8       9.082  -0.326 -56.036  1.00  0.00           C  
ATOM   4898  C   ILE E   8       8.297  -0.523 -57.336  1.00  0.00           C  
ATOM   4899  O   ILE E   8       8.893  -0.625 -58.410  1.00  0.00           O  
ATOM   4900  CB  ILE E   8       9.051  -1.630 -55.218  1.00  0.00           C  
ATOM   4901  CG1 ILE E   8      10.050  -1.557 -54.060  1.00  0.00           C  
ATOM   4902  CG2 ILE E   8       9.351  -2.825 -56.110  1.00  0.00           C  
ATOM   4903  CD1 ILE E   8       9.872  -2.650 -53.031  1.00  0.00           C  
ATOM   4904  N   VAL E   9       6.966  -0.549 -57.243  1.00  0.00           N  
ATOM   4905  CA  VAL E   9       6.108  -0.681 -58.425  1.00  0.00           C  
ATOM   4906  C   VAL E   9       6.295   0.461 -59.445  1.00  0.00           C  
ATOM   4907  O   VAL E   9       6.423   0.203 -60.643  1.00  0.00           O  
ATOM   4908  CB  VAL E   9       4.632  -0.727 -57.988  1.00  0.00           C  
ATOM   4909  CG1 VAL E   9       3.715  -0.607 -59.196  1.00  0.00           C  
ATOM   4910  CG2 VAL E   9       4.356  -2.015 -57.228  1.00  0.00           C  
ATOM   4911  N   ILE E  10       6.331   1.707 -58.977  1.00  0.00           N  
ATOM   4912  CA  ILE E  10       6.543   2.841 -59.883  1.00  0.00           C  
ATOM   4913  C   ILE E  10       7.898   2.717 -60.594  1.00  0.00           C  
ATOM   4914  O   ILE E  10       7.997   2.940 -61.804  1.00  0.00           O  
ATOM   4915  CB  ILE E  10       6.477   4.177 -59.122  1.00  0.00           C  
ATOM   4916  CG1 ILE E  10       5.048   4.449 -58.645  1.00  0.00           C  
ATOM   4917  CG2 ILE E  10       6.974   5.315 -60.001  1.00  0.00           C  
ATOM   4918  CD1 ILE E  10       4.941   5.590 -57.659  1.00  0.00           C  
ATOM   4919  N   ALA E  11       8.924   2.339 -59.833  1.00  0.00           N  
ATOM   4920  CA  ALA E  11      10.267   2.125 -60.366  1.00  0.00           C  
ATOM   4921  C   ALA E  11      10.330   1.014 -61.419  1.00  0.00           C  
ATOM   4922  O   ALA E  11      11.042   1.147 -62.415  1.00  0.00           O  
ATOM   4923  CB  ALA E  11      11.227   1.818 -59.226  1.00  0.00           C  
ATOM   4924  N   ILE E  12       9.602  -0.080 -61.194  1.00  0.00           N  
ATOM   4925  CA  ILE E  12       9.565  -1.180 -62.163  1.00  0.00           C  
ATOM   4926  C   ILE E  12       8.916  -0.742 -63.475  1.00  0.00           C  
ATOM   4927  O   ILE E  12       9.421  -1.058 -64.552  1.00  0.00           O  
ATOM   4928  CB  ILE E  12       8.801  -2.389 -61.592  1.00  0.00           C  
ATOM   4929  CG1 ILE E  12       9.589  -3.025 -60.444  1.00  0.00           C  
ATOM   4930  CG2 ILE E  12       8.530  -3.411 -62.686  1.00  0.00           C  
ATOM   4931  CD1 ILE E  12       8.796  -4.032 -59.643  1.00  0.00           C  
ATOM   4932  N   VAL E  13       7.797  -0.026 -63.377  1.00  0.00           N  
ATOM   4933  CA  VAL E  13       7.107   0.518 -64.548  1.00  0.00           C  
ATOM   4934  C   VAL E  13       8.014   1.535 -65.247  1.00  0.00           C  
ATOM   4935  O   VAL E  13       8.121   1.546 -66.477  1.00  0.00           O  
ATOM   4936  CB  VAL E  13       5.784   1.192 -64.137  1.00  0.00           C  
ATOM   4937  CG1 VAL E  13       5.174   1.931 -65.319  1.00  0.00           C  
ATOM   4938  CG2 VAL E  13       4.818   0.150 -63.595  1.00  0.00           C  
ATOM   4939  N   GLY E  14       8.671   2.376 -64.448  1.00  0.00           N  
ATOM   4940  CA  GLY E  14       9.627   3.349 -64.948  1.00  0.00           C
[truncated: 383,057 more chars]
