# Supplementary material for: Predicting and Interpreting the Structure of Type IV Pilus of Electricigens by Molecular Dynamics Simulations
Source: Molecules. 2017 Aug 12;22(8):1342. doi: 10.3390/molecules22081342 (PMC6152092; doi:10.3390/molecules22081342)
Supplement: Supplementary file 1 [file molecules-22-01342-s001.zip › Neisseria gonorrhoeae 4 (GC4).pdb]

ATOM      1  N   PHE     1      85.922  75.156  77.033  0.00  0.00           N  
ATOM      2  CA  PHE     1      86.450  74.978  78.400  0.00  0.00           C  
ATOM      3  C   PHE     1      86.295  76.206  79.266  0.00  0.00           C  
ATOM      4  O   PHE     1      87.209  76.615  80.017  0.00  0.00           O  
ATOM      5  CB  PHE     1      87.827  74.288  78.545  0.00  0.00           C  
ATOM      6  CG  PHE     1      88.003  72.731  78.448  0.00  0.00           C  
ATOM      7  CD1 PHE     1      89.192  72.139  78.848  0.00  0.00           C  
ATOM      8  CD2 PHE     1      86.948  71.961  77.871  0.00  0.00           C  
ATOM      9  CE1 PHE     1      89.384  70.743  78.546  0.00  0.00           C  
ATOM     10  CE2 PHE     1      87.118  70.612  77.656  0.00  0.00           C  
ATOM     11  CZ  PHE     1      88.360  69.969  77.981  0.00  0.00           C  
ATOM     12  N   THR     2      85.095  76.793  79.327  0.00  0.00           N  
ATOM     13  CA  THR     2      84.650  77.780  80.363  0.00  0.00           C  
ATOM     14  C   THR     2      85.398  79.109  80.574  0.00  0.00           C  
ATOM     15  O   THR     2      84.963  80.132  80.175  0.00  0.00           O  
ATOM     16  CB  THR     2      84.161  77.159  81.685  0.00  0.00           C  
ATOM     17  CG2 THR     2      83.843  75.657  81.544  0.00  0.00           C  
ATOM     18  OG1 THR     2      84.984  77.218  82.803  0.00  0.00           O  
ATOM     19  N   LEU     3      86.584  79.008  81.130  0.00  0.00           N  
ATOM     20  CA  LEU     3      87.557  80.062  81.353  0.00  0.00           C  
ATOM     21  C   LEU     3      88.204  80.434  79.976  0.00  0.00           C  
ATOM     22  O   LEU     3      88.716  79.603  79.222  0.00  0.00           O  
ATOM     23  CB  LEU     3      88.629  79.584  82.355  0.00  0.00           C  
ATOM     24  CG  LEU     3      89.730  80.586  82.818  0.00  0.00           C  
ATOM     25  CD1 LEU     3      89.149  81.687  83.699  0.00  0.00           C  
ATOM     26  CD2 LEU     3      90.723  79.880  83.719  0.00  0.00           C  
ATOM     27  N   ILE     4      88.147  81.650  79.494  0.00  0.00           N  
ATOM     28  CA  ILE     4      88.771  82.138  78.210  0.00  0.00           C  
ATOM     29  C   ILE     4      89.050  83.648  78.211  0.00  0.00           C  
ATOM     30  O   ILE     4      89.947  84.069  77.565  0.00  0.00           O  
ATOM     31  CB  ILE     4      87.854  81.888  76.983  0.00  0.00           C  
ATOM     32  CG1 ILE     4      86.313  81.593  77.187  0.00  0.00           C  
ATOM     33  CG2 ILE     4      88.504  80.693  76.270  0.00  0.00           C  
ATOM     34  CD1 ILE     4      85.449  82.784  77.625  0.00  0.00           C  
ATOM     35  N   GLU     5      88.306  84.354  79.068  0.00  0.00           N  
ATOM     36  CA  GLU     5      88.459  85.794  79.174  0.00  0.00           C  
ATOM     37  C   GLU     5      89.836  86.176  79.746  0.00  0.00           C  
ATOM     38  O   GLU     5      90.408  87.180  79.234  0.00  0.00           O  
ATOM     39  CB  GLU     5      87.303  86.354  80.010  0.00  0.00           C  
ATOM     40  CG  GLU     5      87.178  85.855  81.483  0.00  0.00           C  
ATOM     41  CD  GLU     5      86.612  84.436  81.719  0.00  0.00           C  
ATOM     42  OE1 GLU     5      87.374  83.481  81.417  0.00  0.00           O  
ATOM     43  OE2 GLU     5      85.475  84.212  82.187  0.00  0.00           O1-
ATOM     44  N   LEU     6      90.390  85.380  80.656  0.00  0.00           N  
ATOM     45  CA  LEU     6      91.726  85.499  81.207  0.00  0.00           C  
ATOM     46  C   LEU     6      92.813  85.674  80.190  0.00  0.00           C  
ATOM     47  O   LEU     6      93.420  86.761  80.070  0.00  0.00           O  
ATOM     48  CB  LEU     6      91.894  84.322  82.225  0.00  0.00           C  
ATOM     49  CG  LEU     6      93.295  84.242  82.837  0.00  0.00           C  
ATOM     50  CD1 LEU     6      93.727  85.406  83.665  0.00  0.00           C  
ATOM     51  CD2 LEU     6      93.596  83.134  83.883  0.00  0.00           C  
ATOM     52  N   MET     7      92.826  84.756  79.226  0.00  0.00           N  
ATOM     53  CA  MET     7      93.753  84.777  78.116  0.00  0.00           C  
ATOM     54  C   MET     7      93.605  85.922  77.172  0.00  0.00           C  
ATOM     55  O   MET     7      94.571  86.371  76.532  0.00  0.00           O  
ATOM     56  CB  MET     7      93.737  83.419  77.364  0.00  0.00           C  
ATOM     57  CG  MET     7      94.131  82.125  78.126  0.00  0.00           C  
ATOM     58  SD  MET     7      95.349  82.441  79.450  0.00  0.00           S  
ATOM     59  CE  MET     7      96.834  83.041  78.670  0.00  0.00           C  
ATOM     60  N   ILE     8      92.411  86.491  76.966  0.00  0.00           N  
ATOM     61  CA  ILE     8      92.086  87.703  76.159  0.00  0.00           C  
ATOM     62  C   ILE     8      92.634  88.911  76.909  0.00  0.00           C  
ATOM     63  O   ILE     8      93.311  89.748  76.273  0.00  0.00           O  
ATOM     64  CB  ILE     8      90.551  87.755  75.858  0.00  0.00           C  
ATOM     65  CG1 ILE     8      90.192  86.760  74.688  0.00  0.00           C  
ATOM     66  CG2 ILE     8      90.044  89.158  75.499  0.00  0.00           C  
ATOM     67  CD1 ILE     8      88.779  86.261  74.829  0.00  0.00           C  
ATOM     68  N   VAL     9      92.424  89.043  78.239  0.00  0.00           N  
ATOM     69  CA  VAL     9      92.912  90.138  79.135  0.00  0.00           C  
ATOM     70  C   VAL     9      94.427  90.156  79.154  0.00  0.00           C  
ATOM     71  O   VAL     9      94.935  91.274  78.944  0.00  0.00           O  
ATOM     72  CB  VAL     9      92.179  89.959  80.542  0.00  0.00           C  
ATOM     73  CG1 VAL     9      92.815  90.826  81.674  0.00  0.00           C  
ATOM     74  CG2 VAL     9      90.725  90.386  80.480  0.00  0.00           C  
ATOM     75  N   ILE    10      95.131  89.050  79.240  0.00  0.00           N  
ATOM     76  CA  ILE    10      96.571  88.822  79.082  0.00  0.00           C  
ATOM     77  C   ILE    10      97.110  89.146  77.711  0.00  0.00           C  
ATOM     78  O   ILE    10      98.246  89.701  77.549  0.00  0.00           O  
ATOM     79  CB  ILE    10      96.956  87.471  79.707  0.00  0.00           C  
ATOM     80  CG1 ILE    10      96.686  87.678  81.289  0.00  0.00           C  
ATOM     81  CG2 ILE    10      98.330  86.937  79.403  0.00  0.00           C  
ATOM     82  CD1 ILE    10      97.135  86.555  82.250  0.00  0.00           C  
ATOM     83  N   ALA    11      96.358  88.777  76.657  0.00  0.00           N  
ATOM     84  CA  ALA    11      96.835  89.019  75.300  0.00  0.00           C  
ATOM     85  C   ALA    11      96.825  90.470  74.926  0.00  0.00           C  
ATOM     86  O   ALA    11      97.820  90.947  74.373  0.00  0.00           O  
ATOM     87  CB  ALA    11      95.841  88.293  74.309  0.00  0.00           C  
ATOM     88  N   ILE    12      95.781  91.245  75.312  0.00  0.00           N  
ATOM     89  CA  ILE    12      95.645  92.723  75.148  0.00  0.00           C  
ATOM     90  C   ILE    12      96.704  93.500  75.982  0.00  0.00           C  
ATOM     91  O   ILE    12      97.375  94.352  75.395  0.00  0.00           O  
ATOM     92  CB  ILE    12      94.230  93.090  75.601  0.00  0.00           C  
ATOM     93  CG1 ILE    12      93.212  92.643  74.547  0.00  0.00           C  
ATOM     94  CG2 ILE    12      93.956  94.554  75.888  0.00  0.00           C  
ATOM     95  CD1 ILE    12      93.226  93.269  73.098  0.00  0.00           C  
ATOM     96  N   VAL    13      96.866  93.177  77.302  0.00  0.00           N  
ATOM     97  CA  VAL    13      98.012  93.681  78.046  0.00  0.00           C  
ATOM     98  C   VAL    13      99.348  93.379  77.291  0.00  0.00           C  
ATOM     99  O   VAL    13     100.260  94.194  77.358  0.00  0.00           O  
ATOM    100  CB  VAL    13      98.094  93.175  79.505  0.00  0.00           C  
ATOM    101  CG1 VAL    13      99.400  93.513  80.247  0.00  0.00           C  
ATOM    102  CG2 VAL    13      96.984  93.782  80.364  0.00  0.00           C  
ATOM    103  N   GLY    14      99.503  92.259  76.567  0.00  0.00           N  
ATOM    104  CA  GLY    14     100.745  92.032  75.835  0.00  0.00           C  
ATOM    105  C   GLY    14     100.852  92.915  74.563  0.00  0.00           C  
ATOM    106  O   GLY    14     101.894  93.479  74.308  0.00  0.00           O  
ATOM    107  N   ILE    15      99.735  93.072  73.909  0.00  0.00           N  
ATOM    108  CA  ILE    15      99.608  94.023  72.751  0.00  0.00           C  
ATOM    109  C   ILE    15      99.941  95.467  73.133  0.00  0.00           C  
ATOM    110  O   ILE    15     100.681  96.054  72.420  0.00  0.00           O  
ATOM    111  CB  ILE    15      98.243  93.715  72.052  0.00  0.00           C  
ATOM    112  CG1 ILE    15      98.271  92.473  71.175  0.00  0.00           C  
ATOM    113  CG2 ILE    15      97.814  94.939  71.249  0.00  0.00           C  
ATOM    114  CD1 ILE    15      99.097  92.506  69.927  0.00  0.00           C  
ATOM    115  N   LEU    16      99.590  95.988  74.314  0.00  0.00           N  
ATOM    116  CA  LEU    16      99.949  97.305  74.834  0.00  0.00           C  
ATOM    117  C   LEU    16     101.478  97.348  74.940  0.00  0.00           C  
ATOM    118  O   LEU    16     102.092  98.364  74.495  0.00  0.00           O  
ATOM    119  CB  LEU    16      99.190  97.510  76.108  0.00  0.00           C  
ATOM    120  CG  LEU    16      99.624  98.822  76.793  0.00  0.00           C  
ATOM    121  CD1 LEU    16      99.160 100.115  76.145  0.00  0.00           C  
ATOM    122  CD2 LEU    16      99.066  98.841  78.198  0.00  0.00           C  
ATOM    123  N   ALA    17     102.251  96.255  75.301  0.00  0.00           N  
ATOM    124  CA  ALA    17     103.763  96.283  75.328  0.00  0.00           C  
ATOM    125  C   ALA    17     104.431  96.479  73.948  0.00  0.00           C  
ATOM    126  O   ALA    17     105.530  97.109  73.853  0.00  0.00           O  
ATOM    127  CB  ALA    17     104.224  95.040  76.042  0.00  0.00           C  
ATOM    128  N   ALA    18     103.871  95.839  72.903  0.00  0.00           N  
ATOM    129  CA  ALA    18     104.272  95.997  71.479  0.00  0.00           C  
ATOM    130  C   ALA    18     103.894  97.318  70.792  0.00  0.00           C  
ATOM    131  O   ALA    18     104.523  97.860  69.911  0.00  0.00           O  
ATOM    132  CB  ALA    18     103.794  94.728  70.749  0.00  0.00           C  
ATOM    133  N   VAL    19     102.754  97.868  71.261  0.00  0.00           N  
ATOM    134  CA  VAL    19     102.261  99.231  70.812  0.00  0.00           C  
ATOM    135  C   VAL    19     103.096 100.344  71.524  0.00  0.00           C  
ATOM    136  O   VAL    19     103.443 101.329  70.894  0.00  0.00           O  
ATOM    137  CB  VAL    19     100.800  99.493  71.352  0.00  0.00           C  
ATOM    138  CG1 VAL    19     100.255 100.908  71.317  0.00  0.00           C  
ATOM    139  CG2 VAL    19      99.805  98.684  70.497  0.00  0.00           C  
ATOM    140  N   ALA    20     103.559 100.088  72.766  0.00  0.00           N  
ATOM    141  CA  ALA    20     104.511 100.906  73.464  0.00  0.00           C  
ATOM    142  C   ALA    20     105.949 100.952  72.933  0.00  0.00           C  
ATOM    143  O   ALA    20     106.723 101.871  73.140  0.00  0.00           O  
ATOM    144  CB  ALA    20     104.428 100.503  74.927  0.00  0.00           C  
ATOM    145  N   LEU    21     106.218 100.087  71.963  0.00  0.00           N  
ATOM    146  CA  LEU    21     107.489  99.996  71.430  0.00  0.00           C  
ATOM    147  C   LEU    21     107.924 101.163  70.473  0.00  0.00           C  
ATOM    148  O   LEU    21     108.917 101.832  70.736  0.00  0.00           O  
ATOM    149  CB  LEU    21     107.709  98.527  70.915  0.00  0.00           C  
ATOM    150  CG  LEU    21     108.972  98.139  70.135  0.00  0.00           C  
ATOM    151  CD1 LEU    21     110.249  98.528  70.973  0.00  0.00           C  
ATOM    152  CD2 LEU    21     109.060  96.637  69.853  0.00  0.00           C  
ATOM    153  N   PRO    22     107.224 101.462  69.377  0.00  0.00           N  
ATOM    154  CA  PRO    22     107.403 102.671  68.574  0.00  0.00           C  
ATOM    155  C   PRO    22     106.912 103.929  69.376  0.00  0.00           C  
ATOM    156  O   PRO    22     107.503 105.020  69.209  0.00  0.00           O  
ATOM    157  CB  PRO    22     106.657 102.527  67.224  0.00  0.00           C  
ATOM    158  CG  PRO    22     105.473 101.669  67.683  0.00  0.00           C  
ATOM    159  CD  PRO    22     106.154 100.686  68.705  0.00  0.00           C  
ATOM    160  N   ALA    23     105.874 103.823  70.203  0.00  0.00           N  
ATOM    161  CA  ALA    23     105.291 105.016  70.835  0.00  0.00           C  
ATOM    162  C   ALA    23     106.318 105.555  71.852  0.00  0.00           C  
ATOM    163  O   ALA    23     106.434 106.765  71.926  0.00  0.00           O  
ATOM    164  CB  ALA    23     103.933 104.625  71.526  0.00  0.00           C  
ATOM    165  N   TYR    24     106.975 104.746  72.681  0.00  0.00           N  
ATOM    166  CA  TYR    24     108.105 105.238  73.495  0.00  0.00           C  
ATOM    167  C   TYR    24     109.359 105.735  72.701  0.00  0.00           C  
ATOM    168  O   TYR    24     109.959 106.761  73.045  0.00  0.00           O  
ATOM    169  CB  TYR    24     108.415 104.295  74.691  0.00  0.00           C  
ATOM    170  CG  TYR    24     109.678 104.649  75.501  0.00  0.00           C  
ATOM    171  CD1 TYR    24     109.556 104.833  76.881  0.00  0.00           C  
ATOM    172  CD2 TYR    24     110.920 104.655  74.916  0.00  0.00           C  
ATOM    173  CE1 TYR    24     110.750 105.049  77.676  0.00  0.00           C  
ATOM    174  CE2 TYR    24     112.126 104.592  75.727  0.00  0.00           C  
ATOM    175  CZ  TYR    24     112.019 104.788  77.104  0.00  0.00           C  
ATOM    176  OH  TYR    24     113.241 104.677  77.783  0.00  0.00           O  
ATOM    177  N   GLN    25     109.750 105.019  71.671  0.00  0.00           N  
ATOM    178  CA  GLN    25     110.957 105.314  70.912  0.00  0.00           C  
ATOM    179  C   GLN    25     110.837 106.740  70.245  0.00  0.00           C  
ATOM    180  O   GLN    25     111.614 107.637  70.565  0.00  0.00           O  
ATOM    181  CB  GLN    25     111.266 104.245  69.877  0.00  0.00           C  
ATOM    182  CG  GLN    25     112.159 103.162  70.360  0.00  0.00           C  
ATOM    183  CD  GLN    25     112.320 102.021  69.366  0.00  0.00           C  
ATOM    184  NE2 GLN    25     113.073 100.999  69.700  0.00  0.00           N  
ATOM    185  OE1 GLN    25     111.886 101.995  68.171  0.00  0.00           O  
ATOM    186  N   ASP    26     109.792 106.949  69.432  0.00  0.00           N  
ATOM    187  CA  ASP    26     109.395 108.220  68.756  0.00  0.00           C  
ATOM    188  C   ASP    26     109.381 109.423  69.678  0.00  0.00           C  
ATOM    189  O   ASP    26     110.077 110.431  69.485  0.00  0.00           O  
ATOM    190  CB  ASP    26     108.045 107.986  68.020  0.00  0.00           C  
ATOM    191  CG  ASP    26     107.277 109.287  67.733  0.00  0.00           C  
ATOM    192  OD1 ASP    26     107.638 109.979  66.665  0.00  0.00           O  
ATOM    193  OD2 ASP    26     106.335 109.657  68.506  0.00  0.00           O1-
ATOM    194  N   TYR    27     108.677 109.253  70.839  0.00  0.00           N  
ATOM    195  CA  TYR    27     108.527 110.384  71.846  0.00  0.00           C  
ATOM    196  C   TYR    27     109.732 110.649  72.768  0.00  0.00           C  
ATOM    197  O   TYR    27     109.924 111.755  73.175  0.00  0.00           O  
ATOM    198  CB  TYR    27     107.140 110.474  72.441  0.00  0.00           C  
ATOM    199  CG  TYR    27     107.032 111.326  73.688  0.00  0.00           C  
ATOM    200  CD1 TYR    27     106.320 112.510  73.556  0.00  0.00           C  
ATOM    201  CD2 TYR    27     107.217 110.776  74.950  0.00  0.00           C  
ATOM    202  CE1 TYR    27     105.889 113.170  74.757  0.00  0.00           C  
ATOM    203  CE2 TYR    27     106.925 111.502  76.136  0.00  0.00           C  
ATOM    204  CZ  TYR    27     106.292 112.758  76.052  0.00  0.00           C  
ATOM    205  OH  TYR    27     105.910 113.579  77.153  0.00  0.00           O  
ATOM    206  N   THR    28     110.618 109.674  73.010  0.00  0.00           N  
ATOM    207  CA  THR    28     111.905 109.894  73.662  0.00  0.00           C  
ATOM    208  C   THR    28     113.024 110.279  72.669  0.00  0.00           C  
ATOM    209  O   THR    28     113.765 111.141  73.090  0.00  0.00           O  
ATOM    210  CB  THR    28     112.375 108.677  74.517  0.00  0.00           C  
ATOM    211  CG2 THR    28     111.557 108.342  75.674  0.00  0.00           C  
ATOM    212  OG1 THR    28     112.573 107.523  73.837  0.00  0.00           O  
ATOM    213  N   ALA    29     113.054 109.740  71.404  0.00  0.00           N  
ATOM    214  CA  ALA    29     113.960 110.328  70.360  0.00  0.00           C  
ATOM    215  C   ALA    29     113.844 111.859  70.319  0.00  0.00           C  
ATOM    216  O   ALA    29     114.806 112.557  70.447  0.00  0.00           O  
ATOM    217  CB  ALA    29     113.605 109.664  69.017  0.00  0.00           C  
ATOM    218  N   ARG    30     112.584 112.294  70.344  0.00  0.00           N  
ATOM    219  CA  ARG    30     112.287 113.762  70.242  0.00  0.00           C  
ATOM    220  C   ARG    30     112.910 114.555  71.431  0.00  0.00           C  
ATOM    221  O   ARG    30     113.540 115.553  71.080  0.00  0.00           O  
ATOM    222  CB  ARG    30     110.726 113.909  70.105  0.00  0.00           C  
ATOM    223  CG  ARG    30     110.575 115.232  69.358  0.00  0.00           C  
ATOM    224  CD  ARG    30     109.165 115.692  69.470  0.00  0.00           C  
ATOM    225  NE  ARG    30     108.968 116.779  68.679  0.00  0.00           N  
ATOM    226  CZ  ARG    30     109.390 118.034  68.863  0.00  0.00           C  
ATOM    227  NH1 ARG    30     109.872 118.531  69.956  0.00  0.00           N1+
ATOM    228  NH2 ARG    30     109.350 118.922  67.916  0.00  0.00           N  
ATOM    229  N   ALA    31     112.889 114.043  72.615  0.00  0.00           N  
ATOM    230  CA  ALA    31     113.445 114.483  73.891  0.00  0.00           C  
ATOM    231  C   ALA    31     115.010 114.296  73.953  0.00  0.00           C  
ATOM    232  O   ALA    31     115.778 115.218  74.300  0.00  0.00           O  
ATOM    233  CB  ALA    31     112.741 113.700  75.006  0.00  0.00           C  
ATOM    234  N   GLN    32     115.535 113.210  73.269  0.00  0.00           N  
ATOM    235  CA  GLN    32     116.988 112.956  73.098  0.00  0.00           C  
ATOM    236  C   GLN    32     117.709 113.883  72.130  0.00  0.00           C  
ATOM    237  O   GLN    32     118.755 114.434  72.438  0.00  0.00           O  
ATOM    238  CB  GLN    32     117.075 111.433  72.753  0.00  0.00           C  
ATOM    239  CG  GLN    32     116.899 110.562  73.953  0.00  0.00           C  
ATOM    240  CD  GLN    32     116.437 109.086  73.657  0.00  0.00           C  
ATOM    241  NE2 GLN    32     116.210 108.382  74.711  0.00  0.00           N  
ATOM    242  OE1 GLN    32     116.169 108.574  72.567  0.00  0.00           O  
ATOM    243  N   VAL    33     117.201 114.200  70.986  0.00  0.00           N  
ATOM    244  CA  VAL    33     117.762 115.187  70.069  0.00  0.00           C  
ATOM    245  C   VAL    33     117.585 116.648  70.566  0.00  0.00           C  
ATOM    246  O   VAL    33     118.532 117.419  70.432  0.00  0.00           O  
ATOM    247  CB  VAL    33     117.090 115.004  68.692  0.00  0.00           C  
ATOM    248  CG1 VAL    33     117.364 116.149  67.715  0.00  0.00           C  
ATOM    249  CG2 VAL    33     117.396 113.691  67.961  0.00  0.00           C  
ATOM    250  N   SER    34     116.498 116.914  71.243  0.00  0.00           N  
ATOM    251  CA  SER    34     116.212 118.266  71.707  0.00  0.00           C  
ATOM    252  C   SER    34     117.045 118.676  72.859  0.00  0.00           C  
ATOM    253  O   SER    34     117.333 119.855  72.997  0.00  0.00           O  
ATOM    254  CB  SER    34     114.711 118.559  71.899  0.00  0.00           C  
ATOM    255  OG  SER    34     114.030 117.609  72.710  0.00  0.00           O  
ATOM    256  N   GLU    35     117.511 117.747  73.683  0.00  0.00           N  
ATOM    257  CA  GLU    35     118.507 118.123  74.688  0.00  0.00           C  
ATOM    258  C   GLU    35     119.874 118.585  74.009  0.00  0.00           C  
ATOM    259  O   GLU    35     120.493 119.587  74.429  0.00  0.00           O  
ATOM    260  CB  GLU    35     118.795 116.900  75.513  0.00  0.00           C  
ATOM    261  CG  GLU    35     119.615 117.211  76.727  0.00  0.00           C  
ATOM    262  CD  GLU    35     119.981 116.081  77.737  0.00  0.00           C  
ATOM    263  OE1 GLU    35     120.500 114.974  77.416  0.00  0.00           O  
ATOM    264  OE2 GLU    35     119.836 116.421  78.937  0.00  0.00           O1-
ATOM    265  N   ALA    36     120.337 117.948  72.923  0.00  0.00           N  
ATOM    266  CA  ALA    36     121.556 118.440  72.324  0.00  0.00           C  
ATOM    267  C   ALA    36     121.336 119.827  71.720  0.00  0.00           C  
ATOM    268  O   ALA    36     122.217 120.621  71.754  0.00  0.00           O  
ATOM    269  CB  ALA    36     122.042 117.512  71.206  0.00  0.00           C  
ATOM    270  N   ILE    37     120.111 120.157  71.235  0.00  0.00           N  
ATOM    271  CA  ILE    37     119.786 121.372  70.613  0.00  0.00           C  
ATOM    272  C   ILE    37     119.720 122.468  71.663  0.00  0.00           C  
ATOM    273  O   ILE    37     120.218 123.560  71.432  0.00  0.00           O  
ATOM    274  CB  ILE    37     118.540 121.275  69.759  0.00  0.00           C  
ATOM    275  CG1 ILE    37     118.700 120.287  68.603  0.00  0.00           C  
ATOM    276  CG2 ILE    37     117.983 122.613  69.063  0.00  0.00           C  
ATOM    277  CD1 ILE    37     119.749 120.458  67.506  0.00  0.00           C  
ATOM    278  N   LEU    38     119.253 122.134  72.831  0.00  0.00           N  
ATOM    279  CA  LEU    38     119.325 122.829  74.001  0.00  0.00           C  
ATOM    280  C   LEU    38     120.708 123.172  74.567  0.00  0.00           C  
ATOM    281  O   LEU    38     120.949 124.280  75.104  0.00  0.00           O  
ATOM    282  CB  LEU    38     118.537 122.097  75.092  0.00  0.00           C  
ATOM    283  CG  LEU    38     118.234 122.990  76.413  0.00  0.00           C  
ATOM    284  CD1 LEU    38     117.115 124.017  76.394  0.00  0.00           C  
ATOM    285  CD2 LEU    38     117.836 121.989  77.502  0.00  0.00           C  
ATOM    286  N   LEU    39     121.690 122.279  74.482  0.00  0.00           N  
ATOM    287  CA  LEU    39     123.058 122.485  74.940  0.00  0.00           C  
ATOM    288  C   LEU    39     123.776 123.315  73.935  0.00  0.00           C  
ATOM    289  O   LEU    39     124.688 124.061  74.381  0.00  0.00           O  
ATOM    290  CB  LEU    39     123.682 121.136  75.333  0.00  0.00           C  
ATOM    291  CG  LEU    39     123.176 120.369  76.559  0.00  0.00           C  
ATOM    292  CD1 LEU    39     123.530 118.869  76.419  0.00  0.00           C  
ATOM    293  CD2 LEU    39     123.768 120.925  77.879  0.00  0.00           C  
ATOM    294  N   ALA    40     123.504 123.129  72.653  0.00  0.00           N  
ATOM    295  CA  ALA    40     124.065 123.937  71.582  0.00  0.00           C  
ATOM    296  C   ALA    40     123.534 125.383  71.728  0.00  0.00           C  
ATOM    297  O   ALA    40     124.160 126.286  71.127  0.00  0.00           O  
ATOM    298  CB  ALA    40     123.689 123.372  70.228  0.00  0.00           C  
ATOM    299  N   GLU    41     122.363 125.629  72.351  0.00  0.00           N  
ATOM    300  CA  GLU    41     121.978 127.017  72.598  0.00  0.00           C  
ATOM    301  C   GLU    41     122.842 127.588  73.612  0.00  0.00           C  
ATOM    302  O   GLU    41     123.436 126.868  74.441  0.00  0.00           O  
ATOM    303  CB  GLU    41     120.556 127.219  73.157  0.00  0.00           C  
ATOM    304  CG  GLU    41     119.321 126.671  72.446  0.00  0.00           C  
ATOM    305  CD  GLU    41     119.089 127.077  70.993  0.00  0.00           C  
ATOM    306  OE1 GLU    41     119.758 128.108  70.681  0.00  0.00           O  
ATOM    307  OE2 GLU    41     118.257 126.540  70.237  0.00  0.00           O1-
ATOM    308  N   GLY    42     123.029 128.898  73.537  0.00  0.00           N  
ATOM    309  CA  GLY    42     123.917 129.535  74.493  0.00  0.00           C  
ATOM    310  C   GLY    42     125.418 129.341  74.080  0.00  0.00           C  
ATOM    311  O   GLY    42     126.090 130.346  74.239  0.00  0.00           O  
ATOM    312  N   GLN    43     125.832 128.184  73.555  0.00  0.00           N  
ATOM    313  CA  GLN    43     127.194 127.913  72.948  0.00  0.00           C  
ATOM    314  C   GLN    43     127.372 128.638  71.635  0.00  0.00           C  
ATOM    315  O   GLN    43     128.297 129.445  71.436  0.00  0.00           O  
ATOM    316  CB  GLN    43     127.412 126.413  72.926  0.00  0.00           C  
ATOM    317  CG  GLN    43     128.747 126.083  72.276  0.00  0.00           C  
ATOM    318  CD  GLN    43     129.251 124.607  72.531  0.00  0.00           C  
ATOM    319  NE2 GLN    43     129.089 124.104  73.695  0.00  0.00           N  
ATOM    320  OE1 GLN    43     129.901 123.955  71.744  0.00  0.00           O  
ATOM    321  N   LYS    44     126.321 128.533  70.793  0.00  0.00           N  
ATOM    322  CA  LYS    44     126.234 129.243  69.510  0.00  0.00           C  
ATOM    323  C   LYS    44     126.260 130.841  69.718  0.00  0.00           C  
ATOM    324  O   LYS    44     126.828 131.573  68.911  0.00  0.00           O  
ATOM    325  CB  LYS    44     125.044 128.800  68.694  0.00  0.00           C  
ATOM    326  CG  LYS    44     123.709 129.368  69.012  0.00  0.00           C  
ATOM    327  CD  LYS    44     122.587 128.687  68.237  0.00  0.00           C  
ATOM    328  CE  LYS    44     121.389 129.675  68.236  0.00  0.00           C  
ATOM    329  NZ  LYS    44     120.177 128.935  68.061  0.00  0.00           N1+
ATOM    330  N   SER    45     125.857 131.326  70.917  0.00  0.00           N  
ATOM    331  CA  SER    45     125.927 132.775  71.314  0.00  0.00           C  
ATOM    332  C   SER    45     127.348 133.285  71.687  0.00  0.00           C  
ATOM    333  O   SER    45     127.656 134.433  71.283  0.00  0.00           O  
ATOM    334  CB  SER    45     124.889 133.124  72.449  0.00  0.00           C  
ATOM    335  OG  SER    45     123.680 132.433  72.112  0.00  0.00           O  
ATOM    336  N   ALA    46     128.131 132.508  72.465  0.00  0.00           N  
ATOM    337  CA  ALA    46     129.494 132.841  72.817  0.00  0.00           C  
ATOM    338  C   ALA    46     130.429 132.689  71.501  0.00  0.00           C  
ATOM    339  O   ALA    46     131.359 133.458  71.265  0.00  0.00           O  
ATOM    340  CB  ALA    46     129.841 131.876  73.851  0.00  0.00           C  
ATOM    341  N   VAL    47     130.095 131.792  70.599  0.00  0.00           N  
ATOM    342  CA  VAL    47     130.785 131.618  69.266  0.00  0.00           C  
ATOM    343  C   VAL    47     130.497 132.915  68.401  0.00  0.00           C  
ATOM    344  O   VAL    47     131.432 133.387  67.718  0.00  0.00           O  
ATOM    345  CB  VAL    47     130.211 130.375  68.535  0.00  0.00           C  
ATOM    346  CG1 VAL    47     130.808 130.286  67.155  0.00  0.00           C  
ATOM    347  CG2 VAL    47     130.477 129.075  69.291  0.00  0.00           C  
ATOM    348  N   THR    48     129.212 133.375  68.458  0.00  0.00           N  
ATOM    349  CA  THR    48     128.765 134.543  67.685  0.00  0.00           C  
ATOM    350  C   THR    48     129.510 135.767  68.171  0.00  0.00           C  
ATOM    351  O   THR    48     130.090 136.507  67.328  0.00  0.00           O  
ATOM    352  CB  THR    48     127.250 134.701  67.905  0.00  0.00           C  
ATOM    353  CG2 THR    48     126.746 136.106  67.627  0.00  0.00           C  
ATOM    354  OG1 THR    48     126.555 133.787  67.075  0.00  0.00           O  
ATOM    355  N   GLU    49     129.636 136.046  69.440  0.00  0.00           N  
ATOM    356  CA  GLU    49     130.291 137.287  69.938  0.00  0.00           C  
ATOM    357  C   GLU    49     131.798 137.274  69.528  0.00  0.00           C  
ATOM    358  O   GLU    49     132.334 138.287  69.107  0.00  0.00           O  
ATOM    359  CB  GLU    49     130.139 137.357  71.496  0.00  0.00           C  
ATOM    360  CG  GLU    49     128.554 137.411  71.862  0.00  0.00           C  
ATOM    361  CD  GLU    49     128.010 138.799  72.155  0.00  0.00           C  
ATOM    362  OE1 GLU    49     128.759 139.797  72.263  0.00  0.00           O  
ATOM    363  OE2 GLU    49     126.841 138.957  72.388  0.00  0.00           O1-
ATOM    364  N   TYR    50     132.419 136.051  69.427  0.00  0.00           N  
ATOM    365  CA  TYR    50     133.807 135.981  68.884  0.00  0.00           C  
ATOM    366  C   TYR    50     133.858 136.283  67.448  0.00  0.00           C  
ATOM    367  O   TYR    50     134.600 137.091  66.976  0.00  0.00           O  
ATOM    368  CB  TYR    50     134.291 134.550  69.185  0.00  0.00           C  
ATOM    369  CG  TYR    50     135.725 134.394  69.007  0.00  0.00           C  
ATOM    370  CD1 TYR    50     136.617 134.641  70.081  0.00  0.00           C  
ATOM    371  CD2 TYR    50     136.126 133.965  67.748  0.00  0.00           C  
ATOM    372  CE1 TYR    50     137.995 134.431  69.855  0.00  0.00           C  
ATOM    373  CE2 TYR    50     137.489 133.602  67.543  0.00  0.00           C  
ATOM    374  CZ  TYR    50     138.426 133.858  68.650  0.00  0.00           C  
ATOM    375  OH  TYR    50     139.777 133.599  68.490  0.00  0.00           O  
ATOM    376  N   TYR    51     133.006 135.610  66.631  0.00  0.00           N  
ATOM    377  CA  TYR    51     133.011 135.776  65.186  0.00  0.00           C  
ATOM    378  C   TYR    51     132.579 137.111  64.675  0.00  0.00           C  
ATOM    379  O   TYR    51     133.204 137.686  63.790  0.00  0.00           O  
ATOM    380  CB  TYR    51     132.211 134.644  64.533  0.00  0.00           C  
ATOM    381  CG  TYR    51     131.962 134.680  63.022  0.00  0.00           C  
ATOM    382  CD1 TYR    51     132.909 134.196  62.087  0.00  0.00           C  
ATOM    383  CD2 TYR    51     130.860 135.450  62.520  0.00  0.00           C  
ATOM    384  CE1 TYR    51     132.726 134.259  60.684  0.00  0.00           C  
ATOM    385  CE2 TYR    51     130.635 135.568  61.127  0.00  0.00           C  
ATOM    386  CZ  TYR    51     131.543 134.984  60.215  0.00  0.00           C  
ATOM    387  OH  TYR    51     131.227 135.118  58.901  0.00  0.00           O  
ATOM    388  N   LEU    52     131.574 137.743  65.305  0.00  0.00           N  
ATOM    389  CA  LEU    52     131.185 139.101  65.002  0.00  0.00           C  
ATOM    390  C   LEU    52     132.335 140.143  65.191  0.00  0.00           C  
ATOM    391  O   LEU    52     132.475 141.056  64.364  0.00  0.00           O  
ATOM    392  CB  LEU    52     130.010 139.423  65.880  0.00  0.00           C  
ATOM    393  CG  LEU    52     129.401 140.842  65.805  0.00  0.00           C  
ATOM    394  CD1 LEU    52     128.808 141.038  64.349  0.00  0.00           C  
ATOM    395  CD2 LEU    52     128.208 140.900  66.799  0.00  0.00           C  
ATOM    396  N   ASN    53     133.208 140.049  66.215  0.00  0.00           N  
ATOM    397  CA  ASN    53     134.245 140.950  66.526  0.00  0.00           C  
ATOM    398  C   ASN    53     135.676 140.564  66.044  0.00  0.00           C  
ATOM    399  O   ASN    53     136.311 141.371  65.389  0.00  0.00           O  
ATOM    400  CB  ASN    53     134.272 141.232  68.075  0.00  0.00           C  
ATOM    401  CG  ASN    53     133.129 142.099  68.520  0.00  0.00           C  
ATOM    402  ND2 ASN    53     132.099 141.493  68.937  0.00  0.00           N  
ATOM    403  OD1 ASN    53     133.180 143.298  68.610  0.00  0.00           O  
ATOM    404  N   HIE    54     136.084 139.300  66.124  0.00  0.00           N  
ATOM    405  CA  HIE    54     137.347 138.771  65.521  0.00  0.00           C  
ATOM    406  C   HIE    54     137.189 138.431  64.087  0.00  0.00           C  
ATOM    407  O   HIE    54     138.199 138.120  63.423  0.00  0.00           O  
ATOM    408  CB  HIE    54     137.999 137.642  66.406  0.00  0.00           C  
ATOM    409  CG  HIE    54     138.717 138.158  67.694  0.00  0.00           C  
ATOM    410  CD2 HIE    54     138.416 138.012  69.058  0.00  0.00           C  
ATOM    411  ND1 HIE    54     139.857 138.965  67.675  0.00  0.00           N  
ATOM    412  CE1 HIE    54     140.216 139.236  68.991  0.00  0.00           C  
ATOM    413  NE2 HIE    54     139.444 138.498  69.817  0.00  0.00           N  
ATOM    414  N   GLY    55     135.971 138.478  63.546  0.00  0.00           N  
ATOM    415  CA  GLY    55     135.636 138.413  62.080  0.00  0.00           C  
ATOM    416  C   GLY    55     135.879 137.002  61.455  0.00  0.00           C  
ATOM    417  O   GLY    55     135.907 136.873  60.193  0.00  0.00           O  
ATOM    418  N   LYS    56     136.108 135.999  62.351  0.00  0.00           N  
ATOM    419  CA  LYS    56     136.700 134.732  62.023  0.00  0.00           C  
ATOM    420  C   LYS    56     136.253 133.700  63.053  0.00  0.00           C  
ATOM    421  O   LYS    56     136.108 133.944  64.239  0.00  0.00           O  
ATOM    422  CB  LYS    56     138.265 134.936  61.964  0.00  0.00           C  
ATOM    423  CG  LYS    56     138.877 135.757  60.765  0.00  0.00           C  
ATOM    424  CD  LYS    56     138.734 134.925  59.442  0.00  0.00           C  
ATOM    425  CE  LYS    56     139.138 135.916  58.392  0.00  0.00           C  
ATOM    426  NZ  LYS    56     139.296 135.166  57.044  0.00  0.00           N1+
ATOM    427  N   TRP    57     135.996 132.455  62.591  0.00  0.00           N  
ATOM    428  CA  TRP    57     135.418 131.431  63.445  0.00  0.00           C  
ATOM    429  C   TRP    57     136.274 130.927  64.597  0.00  0.00           C  
ATOM    430  O   TRP    57     137.385 130.524  64.296  0.00  0.00           O  
ATOM    431  CB  TRP    57     134.739 130.378  62.489  0.00  0.00           C  
ATOM    432  CG  TRP    57     133.639 130.626  61.541  0.00  0.00           C  
ATOM    433  CD1 TRP    57     133.854 130.838  60.221  0.00  0.00           C  
ATOM    434  CD2 TRP    57     132.229 130.838  61.765  0.00  0.00           C  
ATOM    435  CE2 TRP    57     131.689 131.178  60.499  0.00  0.00           C  
ATOM    436  CE3 TRP    57     131.427 130.962  62.904  0.00  0.00           C  
ATOM    437  NE1 TRP    57     132.691 131.001  59.558  0.00  0.00           N  
ATOM    438  CZ2 TRP    57     130.320 131.551  60.384  0.00  0.00           C  
ATOM    439  CZ3 TRP    57     130.063 131.280  62.719  0.00  0.00           C  
ATOM    440  CH2 TRP    57     129.506 131.609  61.488  0.00  0.00           C  
ATOM    441  N   PRO    58     135.842 130.778  65.871  0.00  0.00           N  
ATOM    442  CA  PRO    58     136.631 130.138  66.968  0.00  0.00           C  
ATOM    443  C   PRO    58     136.826 128.703  66.671  0.00  0.00           C  
ATOM    444  O   PRO    58     135.880 128.079  66.130  0.00  0.00           O  
ATOM    445  CB  PRO    58     135.793 130.374  68.227  0.00  0.00           C  
ATOM    446  CG  PRO    58     134.316 130.495  67.777  0.00  0.00           C  
ATOM    447  CD  PRO    58     134.453 130.938  66.342  0.00  0.00           C  
ATOM    448  N   GLU    59     137.889 128.057  67.185  0.00  0.00           N  
ATOM    449  CA  GLU    59     138.317 126.675  66.960  0.00  0.00           C  
ATOM    450  C   GLU    59     137.490 125.630  67.748  0.00  0.00           C  
ATOM    451  O   GLU    59     137.291 124.509  67.201  0.00  0.00           O  
ATOM    452  CB  GLU    59     139.840 126.669  67.159  0.00  0.00           C  
ATOM    453  CG  GLU    59     140.430 125.381  66.616  0.00  0.00           C  
ATOM    454  CD  GLU    59     141.255 124.651  67.627  0.00  0.00           C  
ATOM    455  OE1 GLU    59     140.886 123.522  68.024  0.00  0.00           O  
ATOM    456  OE2 GLU    59     142.240 125.221  68.066  0.00  0.00           O1-
ATOM    457  N   ASN    60     137.418 125.927  69.098  0.00  0.00           N  
ATOM    458  CA  ASN    60     137.306 124.968  70.151  0.00  0.00           C  
ATOM    459  C   ASN    60     136.557 125.645  71.305  0.00  0.00           C  
ATOM    460  O   ASN    60     136.391 126.861  71.317  0.00  0.00           O  
ATOM    461  CB  ASN    60     138.656 124.440  70.662  0.00  0.00           C  
ATOM    462  CG  ASN    60     139.359 125.300  71.776  0.00  0.00           C  
ATOM    463  ND2 ASN    60     139.620 124.832  72.982  0.00  0.00           N  
ATOM    464  OD1 ASN    60     139.615 126.418  71.489  0.00  0.00           O  
ATOM    465  N   ASN    61     136.137 124.951  72.347  0.00  0.00           N  
ATOM    466  CA  ASN    61     135.418 125.520  73.454  0.00  0.00           C  
ATOM    467  C   ASN    61     136.048 126.676  74.192  0.00  0.00           C  
ATOM    468  O   ASN    61     135.367 127.652  74.513  0.00  0.00           O  
ATOM    469  CB  ASN    61     135.091 124.428  74.494  0.00  0.00           C  
ATOM    470  CG  ASN    61     133.962 123.529  74.058  0.00  0.00           C  
ATOM    471  ND2 ASN    61     133.250 122.919  74.918  0.00  0.00           N  
ATOM    472  OD1 ASN    61     133.651 123.561  72.841  0.00  0.00           O  
ATOM    473  N   THR    62     137.345 126.562  74.492  0.00  0.00           N  
ATOM    474  CA  THR    62     138.037 127.611  75.269  0.00  0.00           C  
ATOM    475  C   THR    62     138.059 128.916  74.441  0.00  0.00           C  
ATOM    476  O   THR    62     137.653 129.968  74.888  0.00  0.00           O  
ATOM    477  CB  THR    62     139.392 127.175  75.936  0.00  0.00           C  
ATOM    478  CG2 THR    62     139.166 126.093  76.909  0.00  0.00           C  
ATOM    479  OG1 THR    62     140.272 126.714  75.035  0.00  0.00           O  
ATOM    480  N   SER    63     138.611 128.919  73.252  0.00  0.00           N  
ATOM    481  CA  SER    63     138.589 130.076  72.349  0.00  0.00           C  
ATOM    482  C   SER    63     137.205 130.687  72.152  0.00  0.00           C  
ATOM    483  O   SER    63     137.158 131.917  72.380  0.00  0.00           O  
ATOM    484  CB  SER    63     139.332 129.643  71.118  0.00  0.00           C  
ATOM    485  OG  SER    63     138.575 128.726  70.322  0.00  0.00           O  
ATOM    486  N   ALA    64     136.086 129.897  71.950  0.00  0.00           N  
ATOM    487  CA  ALA    64     134.706 130.375  71.790  0.00  0.00           C  
ATOM    488  C   ALA    64     134.116 130.857  73.156  0.00  0.00           C  
ATOM    489  O   ALA    64     133.119 131.562  73.194  0.00  0.00           O  
ATOM    490  CB  ALA    64     133.812 129.282  71.227  0.00  0.00           C  
ATOM    491  N   GLY    65     134.776 130.732  74.370  0.00  0.00           N  
ATOM    492  CA  GLY    65     134.392 131.357  75.640  0.00  0.00           C  
ATOM    493  C   GLY    65     133.356 130.445  76.431  0.00  0.00           C  
ATOM    494  O   GLY    65     132.518 130.969  77.156  0.00  0.00           O  
ATOM    495  N   VAL    66     133.366 129.154  76.139  0.00  0.00           N  
ATOM    496  CA  VAL    66     132.540 128.134  76.827  0.00  0.00           C  
ATOM    497  C   VAL    66     133.407 127.202  77.676  0.00  0.00           C  
ATOM    498  O   VAL    66     134.585 127.442  77.893  0.00  0.00           O  
ATOM    499  CB  VAL    66     131.472 127.459  75.853  0.00  0.00           C  
ATOM    500  CG1 VAL    66     131.067 128.341  74.703  0.00  0.00           C  
ATOM    501  CG2 VAL    66     132.041 126.216  75.176  0.00  0.00           C  
ATOM    502  N   ALA    67     132.748 126.284  78.367  0.00  0.00           N  
ATOM    503  CA  ALA    67     133.318 125.259  79.257  0.00  0.00           C  
ATOM    504  C   ALA    67     134.453 124.533  78.573  0.00  0.00           C  
ATOM    505  O   ALA    67     134.318 124.053  77.440  0.00  0.00           O  
ATOM    506  CB  ALA    67     132.208 124.232  79.478  0.00  0.00           C  
ATOM    507  N   SER    68     135.547 124.293  79.322  0.00  0.00           N  
ATOM    508  CA  SER    68     136.760 123.708  78.858  0.00  0.00           C  
ATOM    509  C   SER    68     136.773 122.222  78.686  0.00  0.00           C  
ATOM    510  O   SER    68     137.822 121.601  78.554  0.00  0.00           O  
ATOM    511  CB  SER    68     137.864 124.302  79.781  0.00  0.00           C  
ATOM    512  OG  SER    68     137.707 124.035  81.144  0.00  0.00           O  
ATOM    513  N   SER    69     135.601 121.556  78.711  0.00  0.00           N  
ATOM    514  CA  SER    69     135.396 120.124  78.376  0.00  0.00           C  
ATOM    515  C   SER    69     134.026 119.998  77.634  0.00  0.00           C  
ATOM    516  O   SER    69     133.075 120.613  78.143  0.00  0.00           O  
ATOM    517  CB  SER    69     135.547 119.116  79.545  0.00  0.00           C  
ATOM    518  OG  SER    69     134.809 117.933  79.227  0.00  0.00           O  
ATOM    519  N   PRO    70     133.845 119.207  76.559  0.00  0.00           N  
ATOM    520  CA  PRO    70     132.565 118.847  76.053  0.00  0.00           C  
ATOM    521  C   PRO    70     131.665 117.995  76.956  0.00  0.00           C  
ATOM    522  O   PRO    70     130.497 117.795  76.750  0.00  0.00           O  
ATOM    523  CB  PRO    70     132.839 118.085  74.749  0.00  0.00           C  
ATOM    524  CG  PRO    70     134.275 117.553  74.882  0.00  0.00           C  
ATOM    525  CD  PRO    70     134.913 118.691  75.751  0.00  0.00           C  
ATOM    526  N   THR    71     132.227 117.381  77.928  0.00  0.00           N  
ATOM    527  CA  THR    71     131.582 116.587  78.994  0.00  0.00           C  
ATOM    528  C   THR    71     131.121 117.366  80.238  0.00  0.00           C  
ATOM    529  O   THR    71     130.004 117.070  80.719  0.00  0.00           O  
ATOM    530  CB  THR    71     132.331 115.288  79.415  0.00  0.00           C  
ATOM    531  CG2 THR    71     133.206 114.669  78.372  0.00  0.00           C  
ATOM    532  OG1 THR    71     133.240 115.567  80.404  0.00  0.00           O  
ATOM    533  N   ASP    72     131.728 118.506  80.532  0.00  0.00           N  
ATOM    534  CA  ASP    72     131.304 119.565  81.473  0.00  0.00           C  
ATOM    535  C   ASP    72     129.901 120.096  81.345  0.00  0.00           C  
ATOM    536  O   ASP    72     129.370 120.711  82.272  0.00  0.00           O  
ATOM    537  CB  ASP    72     132.360 120.716  81.569  0.00  0.00           C  
ATOM    538  CG  ASP    72     133.452 120.687  82.688  0.00  0.00           C  
ATOM    539  OD1 ASP    72     133.860 119.548  83.133  0.00  0.00           O  
ATOM    540  OD2 ASP    72     133.895 121.727  83.246  0.00  0.00           O1-
ATOM    541  N   ILE    73     129.266 119.851  80.231  0.00  0.00           N  
ATOM    542  CA  ILE    73     127.874 120.096  79.897  0.00  0.00           C  
ATOM    543  C   ILE    73     127.060 118.853  79.676  0.00  0.00           C  
ATOM    544  O   ILE    73     126.017 118.893  78.974  0.00  0.00           O  
ATOM    545  CB  ILE    73     127.845 121.205  78.833  0.00  0.00           C  
ATOM    546  CG1 ILE    73     128.230 120.687  77.431  0.00  0.00           C  
ATOM    547  CG2 ILE    73     128.779 122.396  79.266  0.00  0.00           C  
ATOM    548  CD1 ILE    73     128.337 121.837  76.402  0.00  0.00           C  
ATOM    549  N   LYS    74     127.446 117.712  80.198  0.00  0.00           N  
ATOM    550  CA  LYS    74     126.767 116.395  79.830  0.00  0.00           C  
ATOM    551  C   LYS    74     125.301 116.306  80.202  0.00  0.00           C  
ATOM    552  O   LYS    74     124.911 116.567  81.299  0.00  0.00           O  
ATOM    553  CB  LYS    74     127.517 115.222  80.521  0.00  0.00           C  
ATOM    554  CG  LYS    74     126.963 113.792  80.187  0.00  0.00           C  
ATOM    555  CD  LYS    74     127.608 112.784  81.155  0.00  0.00           C  
ATOM    556  CE  LYS    74     127.068 111.412  80.901  0.00  0.00           C  
ATOM    557  NZ  LYS    74     127.439 110.513  82.020  0.00  0.00           N1+
ATOM    558  N   GLY    75     124.545 115.792  79.284  0.00  0.00           N  
ATOM    559  CA  GLY    75     123.088 115.674  79.399  0.00  0.00           C  
ATOM    560  C   GLY    75     122.609 114.304  79.786  0.00  0.00           C  
ATOM    561  O   GLY    75     123.418 113.363  79.949  0.00  0.00           O  
ATOM    562  N   LYS    76     121.264 114.110  79.968  0.00  0.00           N  
ATOM    563  CA  LYS    76     120.598 112.851  80.348  0.00  0.00           C  
ATOM    564  C   LYS    76     120.786 111.755  79.285  0.00  0.00           C  
ATOM    565  O   LYS    76     120.841 110.558  79.569  0.00  0.00           O  
ATOM    566  CB  LYS    76     119.150 113.153  80.752  0.00  0.00           C  
ATOM    567  CG  LYS    76     118.633 112.132  81.794  0.00  0.00           C  
ATOM    568  CD  LYS    76     117.158 112.405  82.153  0.00  0.00           C  
ATOM    569  CE  LYS    76     116.378 111.239  82.840  0.00  0.00           C  
ATOM    570  NZ  LYS    76     116.603 109.824  82.333  0.00  0.00           N1+
ATOM    571  N   TYR    77     120.927 112.228  78.082  0.00  0.00           N  
ATOM    572  CA  TYR    77     121.180 111.347  76.913  0.00  0.00           C  
ATOM    573  C   TYR    77     122.361 111.832  76.153  0.00  0.00           C  
ATOM    574  O   TYR    77     122.946 111.080  75.355  0.00  0.00           O  
ATOM    575  CB  TYR    77     119.917 111.250  76.092  0.00  0.00           C  
ATOM    576  CG  TYR    77     118.755 110.765  76.948  0.00  0.00           C  
ATOM    577  CD1 TYR    77     117.802 111.721  77.292  0.00  0.00           C  
ATOM    578  CD2 TYR    77     118.609 109.426  77.304  0.00  0.00           C  
ATOM    579  CE1 TYR    77     116.850 111.420  78.312  0.00  0.00           C  
ATOM    580  CE2 TYR    77     117.547 109.113  78.259  0.00  0.00           C  
ATOM    581  CZ  TYR    77     116.674 110.102  78.725  0.00  0.00           C  
ATOM    582  OH  TYR    77     115.739 109.809  79.602  0.00  0.00           O  
ATOM    583  N   VAL    78     122.725 113.092  76.187  0.00  0.00           N  
ATOM    584  CA  VAL    78     123.859 113.663  75.399  0.00  0.00           C  
ATOM    585  C   VAL    78     125.202 113.559  76.197  0.00  0.00           C  
ATOM    586  O   VAL    78     125.289 114.004  77.382  0.00  0.00           O  
ATOM    587  CB  VAL    78     123.539 115.144  75.176  0.00  0.00           C  
ATOM    588  CG1 VAL    78     124.696 115.621  74.284  0.00  0.00           C  
ATOM    589  CG2 VAL    78     122.262 115.168  74.342  0.00  0.00           C  
ATOM    590  N   LYS    79     126.281 113.026  75.529  0.00  0.00           N  
ATOM    591  CA  LYS    79     127.525 112.693  76.146  0.00  0.00           C  
ATOM    592  C   LYS    79     128.504 113.834  75.948  0.00  0.00           C  
ATOM    593  O   LYS    79     129.114 114.281  76.852  0.00  0.00           O  
ATOM    594  CB  LYS    79     128.196 111.437  75.501  0.00  0.00           C  
ATOM    595  CG  LYS    79     129.460 111.069  76.362  0.00  0.00           C  
ATOM    596  CD  LYS    79     130.177 109.868  75.707  0.00  0.00           C  
ATOM    597  CE  LYS    79     131.498 109.473  76.447  0.00  0.00           C  
ATOM    598  NZ  LYS    79     132.141 108.382  75.710  0.00  0.00           N1+
ATOM    599  N   GLU    80     128.623 114.430  74.726  0.00  0.00           N  
ATOM    600  CA  GLU    80     129.533 115.440  74.367  0.00  0.00           C  
ATOM    601  C   GLU    80     128.873 116.555  73.511  0.00  0.00           C  
ATOM    602  O   GLU    80     127.965 116.270  72.696  0.00  0.00           O  
ATOM    603  CB  GLU    80     130.719 114.853  73.612  0.00  0.00           C  
ATOM    604  CG  GLU    80     131.748 114.153  74.591  0.00  0.00           C  
ATOM    605  CD  GLU    80     132.773 113.329  73.916  0.00  0.00           C  
ATOM    606  OE1 GLU    80     133.174 113.737  72.816  0.00  0.00           O  
ATOM    607  OE2 GLU    80     133.027 112.218  74.503  0.00  0.00           O1-
ATOM    608  N   VAL    81     129.335 117.790  73.654  0.00  0.00           N  
ATOM    609  CA  VAL    81     128.938 118.966  72.829  0.00  0.00           C  
ATOM    610  C   VAL    81     130.164 119.903  72.825  0.00  0.00           C  
ATOM    611  O   VAL    81     130.706 120.343  73.859  0.00  0.00           O  
ATOM    612  CB  VAL    81     127.684 119.667  73.338  0.00  0.00           C  
ATOM    613  CG1 VAL    81     127.326 120.882  72.400  0.00  0.00           C  
ATOM    614  CG2 VAL    81     126.510 118.824  73.479  0.00  0.00           C  
ATOM    615  N   GLU    82     130.798 120.156  71.616  0.00  0.00           N  
ATOM    616  CA  GLU    82     132.059 121.019  71.458  0.00  0.00           C  
ATOM    617  C   GLU    82     131.973 121.934  70.180  0.00  0.00           C  
ATOM    618  O   GLU    82     131.397 121.549  69.164  0.00  0.00           O  
ATOM    619  CB  GLU    82     133.286 120.161  71.345  0.00  0.00           C  
ATOM    620  CG  GLU    82     134.490 120.692  72.076  0.00  0.00           C  
ATOM    621  CD  GLU    82     135.712 119.745  71.915  0.00  0.00           C  
ATOM    622  OE1 GLU    82     135.888 118.892  71.002  0.00  0.00           O  
ATOM    623  OE2 GLU    82     136.478 119.751  72.878  0.00  0.00           O1-
ATOM    624  N   VAL    83     132.638 123.074  70.193  0.00  0.00           N  
ATOM    625  CA  VAL    83     133.092 123.812  68.966  0.00  0.00           C  
ATOM    626  C   VAL    83     134.106 123.042  68.051  0.00  0.00           C  
ATOM    627  O   VAL    83     135.126 122.538  68.582  0.00  0.00           O  
ATOM    628  CB  VAL    83     133.484 125.206  69.362  0.00  0.00           C  
ATOM    629  CG1 VAL    83     133.791 126.107  68.160  0.00  0.00           C  
ATOM    630  CG2 VAL    83     132.385 126.029  70.191  0.00  0.00           C  
ATOM    631  N   LYS    84     133.897 123.056  66.704  0.00  0.00           N  
ATOM    632  CA  LYS    84     134.857 122.735  65.656  0.00  0.00           C  
ATOM    633  C   LYS    84     134.898 123.786  64.566  0.00  0.00           C  
ATOM    634  O   LYS    84     134.098 123.714  63.644  0.00  0.00           O  
ATOM    635  CB  LYS    84     134.622 121.285  65.173  0.00  0.00           C  
ATOM    636  CG  LYS    84     134.847 120.137  66.190  0.00  0.00           C  
ATOM    637  CD  LYS    84     136.273 119.635  66.374  0.00  0.00           C  
ATOM    638  CE  LYS    84     136.443 119.055  67.792  0.00  0.00           C  
ATOM    639  NZ  LYS    84     136.701 120.154  68.725  0.00  0.00           N1+
ATOM    640  N   ASN    85     135.708 124.793  64.710  0.00  0.00           N  
ATOM    641  CA  ASN    85     135.841 125.842  63.729  0.00  0.00           C  
ATOM    642  C   ASN    85     134.518 126.490  63.367  0.00  0.00           C  
ATOM    643  O   ASN    85     134.008 126.306  62.237  0.00  0.00           O  
ATOM    644  CB  ASN    85     136.678 125.462  62.550  0.00  0.00           C  
ATOM    645  CG  ASN    85     138.096 125.067  62.695  0.00  0.00           C  
ATOM    646  ND2 ASN    85     138.764 124.552  61.657  0.00  0.00           N  
ATOM    647  OD1 ASN    85     138.863 125.328  63.686  0.00  0.00           O  
ATOM    648  N   GLY    86     133.797 127.279  64.252  0.00  0.00           N  
ATOM    649  CA  GLY    86     132.526 127.790  63.786  0.00  0.00           C  
ATOM    650  C   GLY    86     131.434 126.807  63.415  0.00  0.00           C  
ATOM    651  O   GLY    86     130.548 127.118  62.556  0.00  0.00           O  
ATOM    652  N   VAL    87     131.344 125.661  64.040  0.00  0.00           N  
ATOM    653  CA  VAL    87     130.267 124.665  64.112  0.00  0.00           C  
ATOM    654  C   VAL    87     130.194 124.038  65.506  0.00  0.00           C  
ATOM    655  O   VAL    87     131.227 123.727  66.059  0.00  0.00           O  
ATOM    656  CB  VAL    87     130.484 123.559  62.984  0.00  0.00           C  
ATOM    657  CG1 VAL    87     129.338 122.528  62.890  0.00  0.00           C  
ATOM    658  CG2 VAL    87     130.789 124.171  61.628  0.00  0.00           C  
ATOM    659  N   VAL    88     129.008 123.856  66.057  0.00  0.00           N  
ATOM    660  CA  VAL    88     128.746 123.183  67.325  0.00  0.00           C  
ATOM    661  C   VAL    88     128.396 121.698  67.052  0.00  0.00           C  
ATOM    662  O   VAL    88     127.545 121.443  66.251  0.00  0.00           O  
ATOM    663  CB  VAL    88     127.650 123.960  68.135  0.00  0.00           C  
ATOM    664  CG1 VAL    88     127.493 123.321  69.529  0.00  0.00           C  
ATOM    665  CG2 VAL    88     128.060 125.419  68.222  0.00  0.00           C  
ATOM    666  N   THR    89     129.006 120.772  67.718  0.00  0.00           N  
ATOM    667  CA  THR    89     129.134 119.344  67.347  0.00  0.00           C  
ATOM    668  C   THR    89     128.730 118.572  68.568  0.00  0.00           C  
ATOM    669  O   THR    89     129.305 118.880  69.642  0.00  0.00           O  
ATOM    670  CB  THR    89     130.503 119.093  66.786  0.00  0.00           C  
ATOM    671  CG2 THR    89     130.943 119.975  65.592  0.00  0.00           C  
ATOM    672  OG1 THR    89     131.508 119.093  67.846  0.00  0.00           O  
ATOM    673  N   ALA    90     127.846 117.677  68.400  0.00  0.00           N  
ATOM    674  CA  ALA    90     127.159 117.044  69.533  0.00  0.00           C  
ATOM    675  C   ALA    90     126.952 115.525  69.321  0.00  0.00           C  
ATOM    676  O   ALA    90     126.356 115.064  68.357  0.00  0.00           O  
ATOM    677  CB  ALA    90     125.917 117.798  69.819  0.00  0.00           C  
ATOM    678  N   THR    91     127.373 114.722  70.338  0.00  0.00           N  
ATOM    679  CA  THR    91     127.379 113.240  70.409  0.00  0.00           C  
ATOM    680  C   THR    91     126.562 112.669  71.597  0.00  0.00           C  
ATOM    681  O   THR    91     126.782 112.986  72.778  0.00  0.00           O  
ATOM    682  CB  THR    91     128.757 112.679  70.305  0.00  0.00           C  
ATOM    683  CG2 THR    91     128.923 111.484  69.368  0.00  0.00           C  
ATOM    684  OG1 THR    91     129.610 113.656  69.813  0.00  0.00           O  
ATOM    685  N   MET    92     125.749 111.661  71.220  0.00  0.00           N  
ATOM    686  CA  MET    92     124.927 110.840  72.115  0.00  0.00           C  
ATOM    687  C   MET    92     125.673 109.695  72.885  0.00  0.00           C  
ATOM    688  O   MET    92     126.572 109.147  72.383  0.00  0.00           O  
ATOM    689  CB  MET    92     123.819 110.256  71.185  0.00  0.00           C  
ATOM    690  CG  MET    92     122.984 111.364  70.477  0.00  0.00           C  
ATOM    691  SD  MET    92     122.473 112.782  71.525  0.00  0.00           S  
ATOM    692  CE  MET    92     121.288 112.102  72.590  0.00  0.00           C  
ATOM    693  N   LEU    93     125.172 109.335  74.057  0.00  0.00           N  
ATOM    694  CA  LEU    93     125.610 108.204  74.836  0.00  0.00           C  
ATOM    695  C   LEU    93     125.305 106.859  74.063  0.00  0.00           C  
ATOM    696  O   LEU    93     124.532 106.763  73.126  0.00  0.00           O  
ATOM    697  CB  LEU    93     124.896 108.139  76.165  0.00  0.00           C  
ATOM    698  CG  LEU    93     125.295 109.434  76.968  0.00  0.00           C  
ATOM    699  CD1 LEU    93     124.266 109.779  78.042  0.00  0.00           C  
ATOM    700  CD2 LEU    93     126.654 109.164  77.672  0.00  0.00           C  
ATOM    701  N   SER    94     125.933 105.778  74.489  0.00  0.00           N  
ATOM    702  CA  SER    94     125.976 104.506  73.756  0.00  0.00           C  
ATOM    703  C   SER    94     124.875 103.529  74.186  0.00  0.00           C  
ATOM    704  O   SER    94     124.699 102.517  73.470  0.00  0.00           O  
ATOM    705  CB  SER    94     127.379 103.921  73.871  0.00  0.00           C  
ATOM    706  OG  SER    94     127.772 103.954  75.240  0.00  0.00           O  
ATOM    707  N   SER    95     124.237 103.667  75.392  0.00  0.00           N  
ATOM    708  CA  SER    95     123.182 102.809  76.056  0.00  0.00           C  
ATOM    709  C   SER    95     121.934 103.614  76.456  0.00  0.00           C  
ATOM    710  O   SER    95     122.083 104.818  76.846  0.00  0.00           O  
ATOM    711  CB  SER    95     123.904 102.223  77.288  0.00  0.00           C  
ATOM    712  OG  SER    95     123.013 101.586  78.163  0.00  0.00           O  
ATOM    713  N   GLY    96     120.744 103.112  76.126  0.00  0.00           N  
ATOM    714  CA  GLY    96     119.474 103.749  76.408  0.00  0.00           C  
ATOM    715  C   GLY    96     118.943 104.646  75.260  0.00  0.00           C  
ATOM    716  O   GLY    96     117.716 104.935  75.162  0.00  0.00           O  
ATOM    717  N   VAL    97     119.832 105.220  74.409  0.00  0.00           N  
ATOM    718  CA  VAL    97     119.452 106.247  73.385  0.00  0.00           C  
ATOM    719  C   VAL    97     118.741 105.712  72.174  0.00  0.00           C  
ATOM    720  O   VAL    97     119.301 105.546  71.072  0.00  0.00           O  
ATOM    721  CB  VAL    97     120.606 107.314  73.100  0.00  0.00           C  
ATOM    722  CG1 VAL    97     119.889 108.531  72.674  0.00  0.00           C  
ATOM    723  CG2 VAL    97     121.465 107.620  74.284  0.00  0.00           C  
ATOM    724  N   ASN    98     117.472 105.368  72.546  0.00  0.00           N  
ATOM    725  CA  ASN    98     116.569 104.590  71.679  0.00  0.00           C  
ATOM    726  C   ASN    98     117.253 103.248  71.325  0.00  0.00           C  
ATOM    727  O   ASN    98     117.968 102.680  72.086  0.00  0.00           O  
ATOM    728  CB  ASN    98     116.181 105.681  70.561  0.00  0.00           C  
ATOM    729  CG  ASN    98     115.336 105.217  69.341  0.00  0.00           C  
ATOM    730  ND2 ASN    98     114.193 105.751  69.210  0.00  0.00           N  
ATOM    731  OD1 ASN    98     115.832 104.453  68.485  0.00  0.00           O  
ATOM    732  N   ASN    99     117.062 102.731  70.103  0.00  0.00           N  
ATOM    733  CA  ASN    99     117.687 101.588  69.565  0.00  0.00           C  
ATOM    734  C   ASN    99     118.643 102.081  68.416  0.00  0.00           C  
ATOM    735  O   ASN    99     119.781 101.609  68.366  0.00  0.00           O  
ATOM    736  CB  ASN    99     116.650 100.546  69.073  0.00  0.00           C  
ATOM    737  CG  ASN    99     117.101  99.112  69.016  0.00  0.00           C  
ATOM    738  ND2 ASN    99     116.617  98.287  68.098  0.00  0.00           N  
ATOM    739  OD1 ASN    99     117.888  98.679  69.889  0.00  0.00           O  
ATOM    740  N   GLU   100     118.210 103.023  67.570  0.00  0.00           N  
ATOM    741  CA  GLU   100     118.933 103.466  66.363  0.00  0.00           C  
ATOM    742  C   GLU   100     119.987 104.600  66.530  0.00  0.00           C  
ATOM    743  O   GLU   100     120.833 104.834  65.684  0.00  0.00           O  
ATOM    744  CB  GLU   100     117.880 103.855  65.258  0.00  0.00           C  
ATOM    745  CG  GLU   100     117.285 102.654  64.566  0.00  0.00           C  
ATOM    746  CD  GLU   100     116.443 103.002  63.339  0.00  0.00           C  
ATOM    747  OE1 GLU   100     116.408 104.131  62.870  0.00  0.00           O  
ATOM    748  OE2 GLU   100     115.811 102.080  62.682  0.00  0.00           O1-
ATOM    749  N   ILE   101     119.906 105.408  67.569  0.00  0.00           N  
ATOM    750  CA  ILE   101     120.574 106.709  67.728  0.00  0.00           C  
ATOM    751  C   ILE   101     121.688 106.645  68.868  0.00  0.00           C  
ATOM    752  O   ILE   101     122.280 107.660  69.179  0.00  0.00           O  
ATOM    753  CB  ILE   101     119.571 107.948  67.759  0.00  0.00           C  
ATOM    754  CG1 ILE   101     119.126 108.320  69.164  0.00  0.00           C  
ATOM    755  CG2 ILE   101     118.426 107.796  66.794  0.00  0.00           C  
ATOM    756  CD1 ILE   101     118.137 109.531  69.237  0.00  0.00           C  
ATOM    757  N   LYS   102     121.970 105.449  69.404  0.00  0.00           N  
ATOM    758  CA  LYS   102     123.016 105.128  70.291  0.00  0.00           C  
ATOM    759  C   LYS   102     124.384 105.426  69.646  0.00  0.00           C  
ATOM    760  O   LYS   102     124.707 104.844  68.601  0.00  0.00           O  
ATOM    761  CB  LYS   102     122.930 103.612  70.672  0.00  0.00           C  
ATOM    762  CG  LYS   102     121.747 103.228  71.607  0.00  0.00           C  
ATOM    763  CD  LYS   102     121.837 101.785  72.064  0.00  0.00           C  
ATOM    764  CE  LYS   102     121.601 100.872  70.842  0.00  0.00           C  
ATOM    765  NZ  LYS   102     122.011  99.454  71.054  0.00  0.00           N1+
ATOM    766  N   GLY   103     125.160 106.336  70.313  0.00  0.00           N  
ATOM    767  CA  GLY   103     126.506 106.748  69.964  0.00  0.00           C  
ATOM    768  C   GLY   103     126.626 107.770  68.837  0.00  0.00           C  
ATOM    769  O   GLY   103     127.776 107.998  68.434  0.00  0.00           O  
ATOM    770  N   LYS   104     125.533 108.300  68.400  0.00  0.00           N  
ATOM    771  CA  LYS   104     125.505 109.095  67.167  0.00  0.00           C  
ATOM    772  C   LYS   104     125.617 110.710  67.280  0.00  0.00           C  
ATOM    773  O   LYS   104     125.448 111.255  68.321  0.00  0.00           O  
ATOM    774  CB  LYS   104     124.167 108.697  66.436  0.00  0.00           C  
ATOM    775  CG  LYS   104     123.903 107.215  66.165  0.00  0.00           C  
ATOM    776  CD  LYS   104     124.812 106.433  65.241  0.00  0.00           C  
ATOM    777  CE  LYS   104     124.113 105.203  64.656  0.00  0.00           C  
ATOM    778  NZ  LYS   104     124.791 104.694  63.458  0.00  0.00           N1+
ATOM    779  N   LYS   105     126.037 111.397  66.224  0.00  0.00           N  
ATOM    780  CA  LYS   105     126.287 112.818  66.145  0.00  0.00           C  
ATOM    781  C   LYS   105     125.275 113.690  65.349  0.00  0.00           C  
ATOM    782  O   LYS   105     124.532 113.149  64.480  0.00  0.00           O  
ATOM    783  CB  LYS   105     127.747 113.095  65.720  0.00  0.00           C  
ATOM    784  CG  LYS   105     128.063 112.389  64.401  0.00  0.00           C  
ATOM    785  CD  LYS   105     129.335 112.803  63.642  0.00  0.00           C  
ATOM    786  CE  LYS   105     129.591 112.030  62.306  0.00  0.00           C  
ATOM    787  NZ  LYS   105     130.881 112.271  61.708  0.00  0.00           N1+
ATOM    788  N   LEU   106     125.250 115.008  65.694  0.00  0.00           N  
ATOM    789  CA  LEU   106     124.459 116.153  65.083  0.00  0.00           C  
ATOM    790  C   LEU   106     125.406 117.325  64.894  0.00  0.00           C  
ATOM    791  O   LEU   106     126.581 117.282  65.335  0.00  0.00           O  
ATOM    792  CB  LEU   106     123.326 116.594  66.062  0.00  0.00           C  
ATOM    793  CG  LEU   106     122.153 115.589  66.188  0.00  0.00           C  
ATOM    794  CD1 LEU   106     121.200 116.044  67.254  0.00  0.00           C  
ATOM    795  CD2 LEU   106     121.245 115.566  64.920  0.00  0.00           C  
ATOM    796  N   SER   107     124.967 118.358  64.204  0.00  0.00           N  
ATOM    797  CA  SER   107     125.694 119.619  64.288  0.00  0.00           C  
ATOM    798  C   SER   107     124.668 120.788  64.067  0.00  0.00           C  
ATOM    799  O   SER   107     123.545 120.693  63.613  0.00  0.00           O  
ATOM    800  CB  SER   107     126.858 119.734  63.335  0.00  0.00           C  
ATOM    801  OG  SER   107     126.484 120.043  62.053  0.00  0.00           O  
ATOM    802  N   LEU   108     125.142 121.946  64.570  0.00  0.00           N  
ATOM    803  CA  LEU   108     124.496 123.281  64.541  0.00  0.00           C  
ATOM    804  C   LEU   108     125.532 124.223  63.965  0.00  0.00           C  
ATOM    805  O   LEU   108     126.706 124.322  64.397  0.00  0.00           O  
ATOM    806  CB  LEU   108     123.959 123.563  65.878  0.00  0.00           C  
ATOM    807  CG  LEU   108     123.490 125.081  66.007  0.00  0.00           C  
ATOM    808  CD1 LEU   108     122.214 125.179  66.845  0.00  0.00           C  
ATOM    809  CD2 LEU   108     124.607 125.957  66.616  0.00  0.00           C  
ATOM    810  N   TRP   109     125.191 125.012  62.943  0.00  0.00           N  
ATOM    811  CA  TRP   109     126.132 125.682  62.128  0.00  0.00           C  
ATOM    812  C   TRP   109     125.537 127.022  61.592  0.00  0.00           C  
ATOM    813  O   TRP   109     124.346 127.354  61.863  0.00  0.00           O  
ATOM    814  CB  TRP   109     126.625 124.748  60.975  0.00  0.00           C  
ATOM    815  CG  TRP   109     125.594 124.503  59.888  0.00  0.00           C  
ATOM    816  CD1 TRP   109     125.133 125.363  58.933  0.00  0.00           C  
ATOM    817  CD2 TRP   109     124.605 123.430  59.876  0.00  0.00           C  
ATOM    818  CE2 TRP   109     123.703 123.595  58.766  0.00  0.00           C  
ATOM    819  CE3 TRP   109     124.332 122.345  60.699  0.00  0.00           C  
ATOM    820  NE1 TRP   109     124.111 124.736  58.201  0.00  0.00           N  
ATOM    821  CZ2 TRP   109     122.769 122.597  58.342  0.00  0.00           C  
ATOM    822  CZ3 TRP   109     123.364 121.402  60.349  0.00  0.00           C  
ATOM    823  CH2 TRP   109     122.630 121.467  59.150  0.00  0.00           C  
ATOM    824  N   ALA   110     126.386 127.880  60.998  0.00  0.00           N  
ATOM    825  CA  ALA   110     126.099 129.280  60.644  0.00  0.00           C  
ATOM    826  C   ALA   110     126.692 129.932  59.343  0.00  0.00           C  
ATOM    827  O   ALA   110     127.638 129.477  58.714  0.00  0.00           O  
ATOM    828  CB  ALA   110     126.564 130.076  61.861  0.00  0.00           C  
ATOM    829  N   ARG   111     126.000 131.068  59.038  0.00  0.00           N  
ATOM    830  CA  ARG   111     126.142 131.921  57.843  0.00  0.00           C  
ATOM    831  C   ARG   111     126.262 133.396  58.224  0.00  0.00           C  
ATOM    832  O   ARG   111     125.685 133.765  59.261  0.00  0.00           O  
ATOM    833  CB  ARG   111     124.967 131.632  56.900  0.00  0.00           C  
ATOM    834  CG  ARG   111     124.816 130.140  56.414  0.00  0.00           C  
ATOM    835  CD  ARG   111     126.023 129.792  55.475  0.00  0.00           C  
ATOM    836  NE  ARG   111     125.730 128.552  54.723  0.00  0.00           N  
ATOM    837  CZ  ARG   111     126.179 128.224  53.514  0.00  0.00           C  
ATOM    838  NH1 ARG   111     127.130 128.825  52.886  0.00  0.00           N1+
ATOM    839  NH2 ARG   111     125.589 127.288  52.854  0.00  0.00           N  
ATOM    840  N   ARG   112     127.007 134.158  57.428  0.00  0.00           N  
ATOM    841  CA  ARG   112     127.316 135.569  57.796  0.00  0.00           C  
ATOM    842  C   ARG   112     126.130 136.502  57.375  0.00  0.00           C  
ATOM    843  O   ARG   112     125.498 136.301  56.358  0.00  0.00           O  
ATOM    844  CB  ARG   112     128.582 136.061  57.024  0.00  0.00           C  
ATOM    845  CG  ARG   112     129.279 137.378  57.488  0.00  0.00           C  
ATOM    846  CD  ARG   112     130.592 137.666  56.626  0.00  0.00           C  
ATOM    847  NE  ARG   112     130.854 139.106  56.708  0.00  0.00           N  
ATOM    848  CZ  ARG   112     130.964 139.859  57.778  0.00  0.00           C  
ATOM    849  NH1 ARG   112     131.310 139.345  58.940  0.00  0.00           N1+
ATOM    850  NH2 ARG   112     130.852 141.125  57.660  0.00  0.00           N  
ATOM    851  N   GLU   113     125.959 137.569  58.210  0.00  0.00           N  
ATOM    852  CA  GLU   113     124.871 138.619  58.223  0.00  0.00           C  
ATOM    853  C   GLU   113     125.527 139.940  58.805  0.00  0.00           C  
ATOM    854  O   GLU   113     124.900 140.662  59.585  0.00  0.00           O  
ATOM    855  CB  GLU   113     123.705 138.261  59.154  0.00  0.00           C  
ATOM    856  CG  GLU   113     122.713 137.189  58.562  0.00  0.00           C  
ATOM    857  CD  GLU   113     121.744 137.687  57.519  0.00  0.00           C  
ATOM    858  OE1 GLU   113     121.657 138.888  57.231  0.00  0.00           O  
ATOM    859  OE2 GLU   113     121.151 136.807  56.890  0.00  0.00           O1-
ATOM    860  N   ASN   114     126.712 140.338  58.305  0.00  0.00           N  
ATOM    861  CA  ASN   114     127.465 141.621  58.631  0.00  0.00           C  
ATOM    862  C   ASN   114     127.510 141.852  60.167  0.00  0.00           C  
ATOM    863  O   ASN   114     128.294 141.201  60.838  0.00  0.00           O  
ATOM    864  CB  ASN   114     126.901 142.876  57.844  0.00  0.00           C  
ATOM    865  CG  ASN   114     127.152 142.596  56.347  0.00  0.00           C  
ATOM    866  ND2 ASN   114     126.142 142.626  55.504  0.00  0.00           N  
ATOM    867  OD1 ASN   114     128.268 142.285  55.903  0.00  0.00           O  
ATOM    868  N   GLY   115     126.607 142.699  60.708  0.00  0.00           N  
ATOM    869  CA  GLY   115     126.398 142.919  62.207  0.00  0.00           C  
ATOM    870  C   GLY   115     125.764 141.755  62.922  0.00  0.00           C  
ATOM    871  O   GLY   115     125.151 142.042  63.954  0.00  0.00           O  
ATOM    872  N   SER   116     125.602 140.569  62.367  0.00  0.00           N  
ATOM    873  CA  SER   116     124.801 139.475  62.972  0.00  0.00           C  
ATOM    874  C   SER   116     125.276 138.136  62.381  0.00  0.00           C  
ATOM    875  O   SER   116     126.085 138.083  61.439  0.00  0.00           O  
ATOM    876  CB  SER   116     123.321 139.731  62.658  0.00  0.00           C  
ATOM    877  OG  SER   116     122.540 139.049  63.551  0.00  0.00           O  
ATOM    878  N   VAL   117     124.832 137.013  63.026  0.00  0.00           N  
ATOM    879  CA  VAL   117     125.179 135.627  62.680  0.00  0.00           C  
ATOM    880  C   VAL   117     123.945 134.779  62.701  0.00  0.00           C  
ATOM    881  O   VAL   117     123.422 134.596  63.784  0.00  0.00           O  
ATOM    882  CB  VAL   117     126.282 135.031  63.576  0.00  0.00           C  
ATOM    883  CG1 VAL   117     126.953 133.757  62.971  0.00  0.00           C  
ATOM    884  CG2 VAL   117     127.548 135.967  63.653  0.00  0.00           C  
ATOM    885  N   LYS   118     123.690 134.091  61.586  0.00  0.00           N  
ATOM    886  CA  LYS   118     122.464 133.295  61.383  0.00  0.00           C  
ATOM    887  C   LYS   118     122.781 131.751  61.496  0.00  0.00           C  
ATOM    888  O   LYS   118     123.713 131.287  60.836  0.00  0.00           O  
ATOM    889  CB  LYS   118     121.936 133.582  59.968  0.00  0.00           C  
ATOM    890  CG  LYS   118     120.623 132.862  59.694  0.00  0.00           C  
ATOM    891  CD  LYS   118     120.150 133.163  58.242  0.00  0.00           C  
ATOM    892  CE  LYS   118     118.999 132.240  57.897  0.00  0.00           C  
ATOM    893  NZ  LYS   118     118.673 132.335  56.442  0.00  0.00           N1+
ATOM    894  N   TRP   119     121.964 131.050  62.316  0.00  0.00           N  
ATOM    895  CA  TRP   119     122.198 129.692  62.601  0.00  0.00           C  
ATOM    896  C   TRP   119     121.231 128.749  62.115  0.00  0.00           C  
ATOM    897  O   TRP   119     120.080 129.116  61.845  0.00  0.00           O  
ATOM    898  CB  TRP   119     122.309 129.589  64.168  0.00  0.00           C  
ATOM    899  CG  TRP   119     123.461 130.363  64.769  0.00  0.00           C  
ATOM    900  CD1 TRP   119     123.561 131.676  64.926  0.00  0.00           C  
ATOM    901  CD2 TRP   119     124.766 129.762  65.073  0.00  0.00           C  
ATOM    902  CE2 TRP   119     125.608 130.886  65.501  0.00  0.00           C  
ATOM    903  CE3 TRP   119     125.402 128.510  64.824  0.00  0.00           C  
ATOM    904  NE1 TRP   119     124.748 131.954  65.508  0.00  0.00           N  
ATOM    905  CZ2 TRP   119     126.952 130.670  65.795  0.00  0.00           C  
ATOM    906  CZ3 TRP   119     126.736 128.331  65.058  0.00  0.00           C  
ATOM    907  CH2 TRP   119     127.546 129.426  65.564  0.00  0.00           C  
ATOM    908  N   PHE   120     121.619 127.490  62.066  0.00  0.00           N  
ATOM    909  CA  PHE   120     121.002 126.383  61.348  0.00  0.00           C  
ATOM    910  C   PHE   120     121.206 125.034  62.120  0.00  0.00           C  
ATOM    911  O   PHE   120     122.228 125.054  62.816  0.00  0.00           O  
ATOM    912  CB  PHE   120     121.577 126.161  59.904  0.00  0.00           C  
ATOM    913  CG  PHE   120     121.516 127.316  58.975  0.00  0.00           C  
ATOM    914  CD1 PHE   120     122.479 128.362  59.187  0.00  0.00           C  
ATOM    915  CD2 PHE   120     120.560 127.469  57.965  0.00  0.00           C  
ATOM    916  CE1 PHE   120     122.244 129.523  58.450  0.00  0.00           C  
ATOM    917  CE2 PHE   120     120.402 128.652  57.225  0.00  0.00           C  
ATOM    918  CZ  PHE   120     121.293 129.677  57.414  0.00  0.00           C  
ATOM    919  N   CYS   121     120.404 123.934  61.918  0.00  0.00           N  
ATOM    920  CA  CYS   121     120.675 122.597  62.607  0.00  0.00           C  
ATOM    921  C   CYS   121     120.019 121.410  61.968  0.00  0.00           C  
ATOM    922  O   CYS   121     118.990 121.562  61.367  0.00  0.00           O  
ATOM    923  CB  CYS   121     120.395 122.754  64.113  0.00  0.00           C  
ATOM    924  SG  CYS   121     118.763 123.451  64.508  0.00  0.00           S  
ATOM    925  N   GLY   122     120.653 120.251  62.172  0.00  0.00           N  
ATOM    926  CA  GLY   122     120.505 119.018  61.437  0.00  0.00           C  
ATOM    927  C   GLY   122     121.594 118.041  61.714  0.00  0.00           C  
ATOM    928  O   GLY   122     122.016 117.862  62.843  0.00  0.00           O  
ATOM    929  N   GLN   123     122.006 117.498  60.621  0.00  0.00           N  
ATOM    930  CA  GLN   123     123.040 116.511  60.572  0.00  0.00           C  
ATOM    931  C   GLN   123     124.508 117.135  60.777  0.00  0.00           C  
ATOM    932  O   GLN   123     124.617 118.352  60.914  0.00  0.00           O  
ATOM    933  CB  GLN   123     122.961 115.598  59.274  0.00  0.00           C  
ATOM    934  CG  GLN   123     121.670 114.799  59.403  0.00  0.00           C  
ATOM    935  CD  GLN   123     121.490 113.765  58.347  0.00  0.00           C  
ATOM    936  NE2 GLN   123     120.997 112.581  58.759  0.00  0.00           N  
ATOM    937  OE1 GLN   123     121.692 113.958  57.164  0.00  0.00           O  
ATOM    938  N   PRO   124     125.569 116.316  60.972  0.00  0.00           N  
ATOM    939  CA  PRO   124     126.900 116.756  61.155  0.00  0.00           C  
ATOM    940  C   PRO   124     127.422 117.396  59.801  0.00  0.00           C  
ATOM    941  O   PRO   124     127.148 116.919  58.713  0.00  0.00           O  
ATOM    942  CB  PRO   124     127.717 115.552  61.534  0.00  0.00           C  
ATOM    943  CG  PRO   124     126.752 114.372  61.803  0.00  0.00           C  
ATOM    944  CD  PRO   124     125.596 114.880  61.040  0.00  0.00           C  
ATOM    945  N   VAL   125     128.190 118.526  60.018  0.00  0.00           N  
ATOM    946  CA  VAL   125     128.858 119.324  58.963  0.00  0.00           C  
ATOM    947  C   VAL   125     130.204 119.882  59.363  0.00  0.00           C  
ATOM    948  O   VAL   125     130.492 120.036  60.589  0.00  0.00           O  
ATOM    949  CB  VAL   125     127.955 120.446  58.401  0.00  0.00           C  
ATOM    950  CG1 VAL   125     126.464 120.167  58.249  0.00  0.00           C  
ATOM    951  CG2 VAL   125     128.043 121.691  59.201  0.00  0.00           C  
ATOM    952  N   THR   126     130.976 120.178  58.372  0.00  0.00           N  
ATOM    953  CA  THR   126     132.238 120.868  58.482  0.00  0.00           C  
ATOM    954  C   THR   126     132.192 122.348  57.999  0.00  0.00           C  
ATOM    955  O   THR   126     131.393 122.711  57.138  0.00  0.00           O  
ATOM    956  CB  THR   126     133.440 120.076  57.918  0.00  0.00           C  
ATOM    957  CG2 THR   126     133.327 118.555  58.116  0.00  0.00           C  
ATOM    958  OG1 THR   126     133.539 120.398  56.607  0.00  0.00           O  
ATOM    959  N   ARG   127     133.062 123.195  58.601  0.00  0.00           N  
ATOM    960  CA  ARG   127     133.465 124.576  58.196  0.00  0.00           C  
ATOM    961  C   ARG   127     134.423 124.606  56.996  0.00  0.00           C  
ATOM    962  O   ARG   127     135.621 124.447  57.193  0.00  0.00           O  
ATOM    963  CB  ARG   127     133.998 125.320  59.423  0.00  0.00           C  
ATOM    964  CG  ARG   127     134.537 126.748  59.183  0.00  0.00           C  
ATOM    965  CD  ARG   127     133.448 127.770  58.663  0.00  0.00           C  
ATOM    966  NE  ARG   127     132.175 127.764  59.378  0.00  0.00           N  
ATOM    967  CZ  ARG   127     131.012 128.187  58.995  0.00  0.00           C  
ATOM    968  NH1 ARG   127     130.826 128.658  57.803  0.00  0.00           N1+
ATOM    969  NH2 ARG   127     130.045 128.171  59.835  0.00  0.00           N  
ATOM    970  N   THR   128     133.891 124.853  55.768  0.00  0.00           N  
ATOM    971  CA  THR   128     134.775 125.223  54.637  0.00  0.00           C  
ATOM    972  C   THR   128     135.416 126.563  54.759  0.00  0.00           C  
ATOM    973  O   THR   128     136.590 126.629  54.955  0.00  0.00           O  
ATOM    974  CB  THR   128     134.110 125.188  53.248  0.00  0.00           C  
ATOM    975  CG2 THR   128     134.692 124.183  52.319  0.00  0.00           C  
ATOM    976  OG1 THR   128     132.758 124.799  53.289  0.00  0.00           O  
ATOM    977  N   ASP   129     134.696 127.647  54.701  0.00  0.00           N  
ATOM    978  CA  ASP   129     135.280 129.004  54.701  0.00  0.00           C  
ATOM    979  C   ASP   129     134.517 129.934  55.590  0.00  0.00           C  
ATOM    980  O   ASP   129     133.618 129.560  56.384  0.00  0.00           O  
ATOM    981  CB  ASP   129     135.456 129.478  53.228  0.00  0.00           C  
ATOM    982  CG  ASP   129     134.206 129.757  52.438  0.00  0.00           C  
ATOM    983  OD1 ASP   129     133.230 130.271  53.098  0.00  0.00           O  
ATOM    984  OD2 ASP   129     134.074 129.402  51.224  0.00  0.00           O1-
ATOM    985  N   ASP   130     134.802 131.239  55.539  0.00  0.00           N  
ATOM    986  CA  ASP   130     134.063 132.316  56.205  0.00  0.00           C  
ATOM    987  C   ASP   130     132.571 132.266  56.389  0.00  0.00           C  
ATOM    988  O   ASP   130     131.957 132.933  57.285  0.00  0.00           O  
ATOM    989  CB  ASP   130     134.598 133.665  55.705  0.00  0.00           C  
ATOM    990  CG  ASP   130     136.079 133.938  56.222  0.00  0.00           C  
ATOM    991  OD1 ASP   130     136.413 133.357  57.245  0.00  0.00           O  
ATOM    992  OD2 ASP   130     136.873 134.712  55.582  0.00  0.00           O1-
ATOM    993  N   ASP   131     131.914 131.563  55.479  0.00  0.00           N  
ATOM    994  CA  ASP   131     130.469 131.314  55.492  0.00  0.00           C  
ATOM    995  C   ASP   131     129.977 129.861  55.076  0.00  0.00           C  
ATOM    996  O   ASP   131     129.067 129.267  55.646  0.00  0.00           O  
ATOM    997  CB  ASP   131     129.817 132.396  54.681  0.00  0.00           C  
ATOM    998  CG  ASP   131     128.308 132.136  54.252  0.00  0.00           C  
ATOM    999  OD1 ASP   131     127.437 132.937  54.647  0.00  0.00           O  
ATOM   1000  OD2 ASP   131     128.041 131.284  53.361  0.00  0.00           O1-
ATOM   1001  N   THR   132     130.643 129.314  54.045  0.00  0.00           N  
ATOM   1002  CA  THR   132     130.402 127.992  53.497  0.00  0.00           C  
ATOM   1003  C   THR   132     130.710 126.809  54.396  0.00  0.00           C  
ATOM   1004  O   THR   132     131.632 126.788  55.222  0.00  0.00           O  
ATOM   1005  CB  THR   132     131.269 127.742  52.142  0.00  0.00           C  
ATOM   1006  CG2 THR   132     130.535 126.794  51.198  0.00  0.00           C  
ATOM   1007  OG1 THR   132     131.370 128.825  51.243  0.00  0.00           O  
ATOM   1008  N   VAL   133     129.906 125.809  54.238  0.00  0.00           N  
ATOM   1009  CA  VAL   133     129.974 124.506  54.959  0.00  0.00           C  
ATOM   1010  C   VAL   133     129.922 123.388  53.990  0.00  0.00           C  
ATOM   1011  O   VAL   133     129.684 123.589  52.761  0.00  0.00           O  
ATOM   1012  CB  VAL   133     128.902 124.318  56.050  0.00  0.00           C  
ATOM   1013  CG1 VAL   133     129.031 125.287  57.269  0.00  0.00           C  
ATOM   1014  CG2 VAL   133     127.497 124.616  55.592  0.00  0.00           C  
ATOM   1015  N   ALA   134     130.291 122.192  54.440  0.00  0.00           N  
ATOM   1016  CA  ALA   134     130.473 120.956  53.592  0.00  0.00           C  
ATOM   1017  C   ALA   134     130.114 119.699  54.404  0.00  0.00           C  
ATOM   1018  O   ALA   134     130.022 119.803  55.605  0.00  0.00           O  
ATOM   1019  CB  ALA   134     131.863 120.862  52.968  0.00  0.00           C  
ATOM   1020  N   ASP   135     129.903 118.574  53.679  0.00  0.00           N  
ATOM   1021  CA  ASP   135     129.493 117.290  54.305  0.00  0.00           C  
ATOM   1022  C   ASP   135     130.448 116.642  55.354  0.00  0.00           C  
ATOM   1023  O   ASP   135     131.640 116.631  55.164  0.00  0.00           O  
ATOM   1024  CB  ASP   135     129.320 116.284  53.100  0.00  0.00           C  
ATOM   1025  CG  ASP   135     129.554 114.799  53.542  0.00  0.00           C  
ATOM   1026  OD1 ASP   135     128.659 114.203  54.173  0.00  0.00           O  
ATOM   1027  OD2 ASP   135     130.719 114.248  53.432  0.00  0.00           O1-
ATOM   1028  N   ALA   136     129.927 115.922  56.363  0.00  0.00           N  
ATOM   1029  CA  ALA   136     130.742 115.039  57.269  0.00  0.00           C  
ATOM   1030  C   ALA   136     130.198 113.635  57.557  0.00  0.00           C  
ATOM   1031  O   ALA   136     130.664 113.067  58.573  0.00  0.00           O  
ATOM   1032  CB  ALA   136     131.112 115.769  58.566  0.00  0.00           C  
ATOM   1033  N   LYS   137     129.266 113.017  56.764  0.00  0.00           N  
ATOM   1034  CA  LYS   137     128.750 111.684  56.976  0.00  0.00           C  
ATOM   1035  C   LYS   137     129.822 110.601  57.024  0.00  0.00           C  
ATOM   1036  O   LYS   137     130.868 110.769  56.378  0.00  0.00           O  
ATOM   1037  CB  LYS   137     127.818 111.458  55.814  0.00  0.00           C  
ATOM   1038  CG  LYS   137     127.111 110.122  55.627  0.00  0.00           C  
ATOM   1039  CD  LYS   137     126.434 109.939  54.290  0.00  0.00           C  
ATOM   1040  CE  LYS   137     125.853 108.531  54.152  0.00  0.00           C  
ATOM   1041  NZ  LYS   137     124.880 108.186  55.220  0.00  0.00           N1+
ATOM   1042  N   ASP   138     129.602 109.614  57.917  0.00  0.00           N  
ATOM   1043  CA  ASP   138     130.500 108.447  57.988  0.00  0.00           C  
ATOM   1044  C   ASP   138     129.739 107.212  58.433  0.00  0.00           C  
ATOM   1045  O   ASP   138     130.367 106.185  58.657  0.00  0.00           O  
ATOM   1046  CB  ASP   138     131.793 108.739  58.718  0.00  0.00           C  
ATOM   1047  CG  ASP   138     131.720 109.486  60.054  0.00  0.00           C  
ATOM   1048  OD1 ASP   138     130.680 109.429  60.760  0.00  0.00           O  
ATOM   1049  OD2 ASP   138     132.653 110.109  60.407  0.00  0.00           O1-
ATOM   1050  N   GLY   139     128.425 107.221  58.677  0.00  0.00           N  
ATOM   1051  CA  GLY   139     127.732 106.166  59.566  0.00  0.00           C  
ATOM   1052  C   GLY   139     127.165 106.585  60.891  0.00  0.00           C  
ATOM   1053  O   GLY   139     126.051 106.201  61.272  0.00  0.00           O  
ATOM   1054  N   LYS   140     127.975 107.379  61.573  0.00  0.00           N  
ATOM   1055  CA  LYS   140     127.707 107.875  62.901  0.00  0.00           C  
ATOM   1056  C   LYS   140     126.737 109.082  63.005  0.00  0.00           C  
ATOM   1057  O   LYS   140     126.362 109.473  64.154  0.00  0.00           O  
ATOM   1058  CB  LYS   140     129.005 108.274  63.699  0.00  0.00           C  
ATOM   1059  CG  LYS   140     130.071 107.173  63.728  0.00  0.00           C  
ATOM   1060  CD  LYS   140     131.408 107.791  64.239  0.00  0.00           C  
ATOM   1061  CE  LYS   140     132.589 106.882  64.191  0.00  0.00           C  
ATOM   1062  NZ  LYS   140     133.160 106.512  62.880  0.00  0.00           N1+
ATOM   1063  N   GLU   141     126.319 109.729  61.909  0.00  0.00           N  
ATOM   1064  CA  GLU   141     125.231 110.696  61.947  0.00  0.00           C  
ATOM   1065  C   GLU   141     123.909 110.135  62.354  0.00  0.00           C  
ATOM   1066  O   GLU   141     123.684 108.952  62.135  0.00  0.00           O  
ATOM   1067  CB  GLU   141     125.154 111.412  60.585  0.00  0.00           C  
ATOM   1068  CG  GLU   141     124.483 110.600  59.473  0.00  0.00           C  
ATOM   1069  CD  GLU   141     125.410 109.448  58.890  0.00  0.00           C  
ATOM   1070  OE1 GLU   141     126.601 109.363  59.152  0.00  0.00           O  
ATOM   1071  OE2 GLU   141     124.832 108.662  58.066  0.00  0.00           O1-
ATOM   1072  N   ILE   142     123.006 110.868  63.010  0.00  0.00           N  
ATOM   1073  CA  ILE   142     121.668 110.424  63.264  0.00  0.00           C  
ATOM   1074  C   ILE   142     120.892 110.652  61.998  0.00  0.00           C  
ATOM   1075  O   ILE   142     121.038 111.704  61.343  0.00  0.00           O  
ATOM   1076  CB  ILE   142     120.963 111.216  64.443  0.00  0.00           C  
ATOM   1077  CG1 ILE   142     121.655 110.904  65.711  0.00  0.00           C  
ATOM   1078  CG2 ILE   142     119.464 110.957  64.542  0.00  0.00           C  
ATOM   1079  CD1 ILE   142     121.140 111.546  66.950  0.00  0.00           C  
ATOM   1080  N   ASP   143     120.133 109.644  61.631  0.00  0.00           N  
ATOM   1081  CA  ASP   143     119.386 109.761  60.372  0.00  0.00           C  
ATOM   1082  C   ASP   143     118.096 110.701  60.510  0.00  0.00           C  
ATOM   1083  O   ASP   143     117.593 110.795  61.606  0.00  0.00           O  
ATOM   1084  CB  ASP   143     119.066 108.340  59.902  0.00  0.00           C  
ATOM   1085  CG  ASP   143     118.388 108.253  58.553  0.00  0.00           C  
ATOM   1086  OD1 ASP   143     118.493 109.212  57.743  0.00  0.00           O  
ATOM   1087  OD2 ASP   143     117.894 107.155  58.204  0.00  0.00           O1-
ATOM   1088  N   THR   144     117.578 111.262  59.359  0.00  0.00           N  
ATOM   1089  CA  THR   144     116.558 112.374  59.275  0.00  0.00           C  
ATOM   1090  C   THR   144     115.125 111.959  59.830  0.00  0.00           C  
ATOM   1091  O   THR   144     114.439 112.806  60.490  0.00  0.00           O  
ATOM   1092  CB  THR   144     116.449 112.999  57.847  0.00  0.00           C  
ATOM   1093  CG2 THR   144     117.734 113.018  57.055  0.00  0.00           C  
ATOM   1094  OG1 THR   144     115.522 112.360  56.959  0.00  0.00           O  
ATOM   1095  N   LYS   145     114.770 110.741  59.846  0.00  0.00           N  
ATOM   1096  CA  LYS   145     113.694 110.012  60.534  0.00  0.00           C  
ATOM   1097  C   LYS   145     113.573 110.160  62.093  0.00  0.00           C  
ATOM   1098  O   LYS   145     112.438 109.875  62.605  0.00  0.00           O  
ATOM   1099  CB  LYS   145     113.778 108.506  60.169  0.00  0.00           C  
ATOM   1100  CG  LYS   145     114.863 107.772  61.042  0.00  0.00           C  
ATOM   1101  CD  LYS   145     114.905 106.274  60.728  0.00  0.00           C  
ATOM   1102  CE  LYS   145     113.798 105.557  61.437  0.00  0.00           C  
ATOM   1103  NZ  LYS   145     113.918 104.056  61.319  0.00  0.00           N1+
ATOM   1104  N   HIE   146     114.597 110.645  62.822  0.00  0.00           N  
ATOM   1105  CA  HIE   146     114.572 110.815  64.279  0.00  0.00           C  
ATOM   1106  C   HIE   146     114.639 112.271  64.675  0.00  0.00           C  
ATOM   1107  O   HIE   146     114.292 112.605  65.817  0.00  0.00           O  
ATOM   1108  CB  HIE   146     115.724 110.002  64.847  0.00  0.00           C  
ATOM   1109  CG  HIE   146     115.604 108.521  64.851  0.00  0.00           C  
ATOM   1110  CD2 HIE   146     116.371 107.637  64.023  0.00  0.00           C  
ATOM   1111  ND1 HIE   146     114.713 107.735  65.617  0.00  0.00           N  
ATOM   1112  CE1 HIE   146     115.021 106.422  65.282  0.00  0.00           C  
ATOM   1113  NE2 HIE   146     115.963 106.359  64.340  0.00  0.00           N  
ATOM   1114  N   LEU   147     115.068 113.166  63.766  0.00  0.00           N  
ATOM   1115  CA  LEU   147     115.237 114.576  63.910  0.00  0.00           C  
ATOM   1116  C   LEU   147     113.932 115.318  63.930  0.00  0.00           C  
ATOM   1117  O   LEU   147     113.147 115.149  62.977  0.00  0.00           O  
ATOM   1118  CB  LEU   147     116.144 115.050  62.779  0.00  0.00           C  
ATOM   1119  CG  LEU   147     117.714 114.926  62.960  0.00  0.00           C  
ATOM   1120  CD1 LEU   147     118.137 113.605  63.495  0.00  0.00           C  
ATOM   1121  CD2 LEU   147     118.490 115.202  61.705  0.00  0.00           C  
ATOM   1122  N   PRO   148     113.746 116.309  64.811  0.00  0.00           N  
ATOM   1123  CA  PRO   148     112.507 117.097  64.837  0.00  0.00           C  
ATOM   1124  C   PRO   148     112.339 117.929  63.570  0.00  0.00           C  
ATOM   1125  O   PRO   148     113.243 118.044  62.752  0.00  0.00           O  
ATOM   1126  CB  PRO   148     112.728 118.058  66.044  0.00  0.00           C  
ATOM   1127  CG  PRO   148     113.594 117.191  66.984  0.00  0.00           C  
ATOM   1128  CD  PRO   148     114.541 116.528  65.972  0.00  0.00           C  
ATOM   1129  N   SER   149     111.092 118.395  63.312  0.00  0.00           N  
ATOM   1130  CA  SER   149     110.849 119.025  62.031  0.00  0.00           C  
ATOM   1131  C   SER   149     111.470 120.394  61.869  0.00  0.00           C  
ATOM   1132  O   SER   149     111.663 120.890  60.731  0.00  0.00           O  
ATOM   1133  CB  SER   149     109.319 119.117  61.899  0.00  0.00           C  
ATOM   1134  OG  SER   149     108.647 119.953  62.910  0.00  0.00           O  
ATOM   1135  N   THR   150     111.866 121.038  63.002  0.00  0.00           N  
ATOM   1136  CA  THR   150     112.619 122.316  62.999  0.00  0.00           C  
ATOM   1137  C   THR   150     114.143 122.042  62.911  0.00  0.00           C  
ATOM   1138  O   THR   150     114.876 122.972  63.074  0.00  0.00           O  
ATOM   1139  CB  THR   150     112.173 123.120  64.245  0.00  0.00           C  
ATOM   1140  CG2 THR   150     110.782 123.664  64.100  0.00  0.00           C  
ATOM   1141  OG1 THR   150     112.249 122.298  65.356  0.00  0.00           O  
ATOM   1142  N   CYS   151     114.652 120.790  62.698  0.00  0.00           N  
ATOM   1143  CA  CYS   151     116.083 120.433  62.844  0.00  0.00           C  
ATOM   1144  C   CYS   151     116.533 119.455  61.743  0.00  0.00           C  
ATOM   1145  O   CYS   151     117.105 118.369  61.933  0.00  0.00           O  
ATOM   1146  CB  CYS   151     116.421 119.961  64.337  0.00  0.00           C  
ATOM   1147  SG  CYS   151     115.969 121.141  65.643  0.00  0.00           S  
ATOM   1148  N   ARG   152     116.354 119.853  60.472  0.00  0.00           N  
ATOM   1149  CA  ARG   152     116.361 118.891  59.332  0.00  0.00           C  
ATOM   1150  C   ARG   152     117.298 119.349  58.213  0.00  0.00           C  
ATOM   1151  O   ARG   152     117.260 118.980  57.008  0.00  0.00           O  
ATOM   1152  CB  ARG   152     115.045 118.389  58.784  0.00  0.00           C  
ATOM   1153  CG  ARG   152     114.593 117.209  59.638  0.00  0.00           C  
ATOM   1154  CD  ARG   152     113.193 116.577  59.213  0.00  0.00           C  
ATOM   1155  NE  ARG   152     112.686 115.712  60.195  0.00  0.00           N  
ATOM   1156  CZ  ARG   152     111.801 114.716  60.064  0.00  0.00           C  
ATOM   1157  NH1 ARG   152     111.258 114.286  58.929  0.00  0.00           N1+
ATOM   1158  NH2 ARG   152     111.370 114.143  61.147  0.00  0.00           N  
ATOM   1159  N   ASP   153     118.132 120.372  58.558  0.00  0.00           N  
ATOM   1160  CA  ASP   153     118.892 121.191  57.513  0.00  0.00           C  
ATOM   1161  C   ASP   153     120.189 120.330  57.106  0.00  0.00           C  
ATOM   1162  O   ASP   153     120.519 119.308  57.708  0.00  0.00           O  
ATOM   1163  CB  ASP   153     119.233 122.540  58.111  0.00  0.00           C  
ATOM   1164  CG  ASP   153     118.171 123.510  58.561  0.00  0.00           C  
ATOM   1165  OD1 ASP   153     116.973 123.239  58.246  0.00  0.00           O  
ATOM   1166  OD2 ASP   153     118.473 124.568  59.162  0.00  0.00           O1-
ATOM   1167  N   ASN   154     120.908 120.753  56.039  0.00  0.00           N  
ATOM   1168  CA  ASN   154     122.146 120.198  55.491  0.00  0.00           C  
ATOM   1169  C   ASN   154     123.133 121.294  54.967  0.00  0.00           C  
ATOM   1170  O   ASN   154     122.759 122.498  54.950  0.00  0.00           O  
ATOM   1171  CB  ASN   154     121.794 119.187  54.387  0.00  0.00           C  
ATOM   1172  CG  ASN   154     121.158 119.652  53.165  0.00  0.00           C  
ATOM   1173  ND2 ASN   154     120.800 118.705  52.315  0.00  0.00           N  
ATOM   1174  OD1 ASN   154     121.097 120.849  52.870  0.00  0.00           O  
ATOM   1175  N   PHE   155     124.323 120.886  54.547  0.00  0.00           N  
ATOM   1176  CA  PHE   155     125.389 121.726  53.848  0.00  0.00           C  
ATOM   1177  C   PHE   155     124.926 122.747  52.805  0.00  0.00           C  
ATOM   1178  O   PHE   155     125.584 123.729  52.603  0.00  0.00           O  
ATOM   1179  CB  PHE   155     126.489 120.754  53.317  0.00  0.00           C  
ATOM   1180  CG  PHE   155     125.925 119.478  52.708  0.00  0.00           C  
ATOM   1181  CD1 PHE   155     125.292 119.469  51.429  0.00  0.00           C  
ATOM   1182  CD2 PHE   155     126.074 118.274  53.409  0.00  0.00           C  
ATOM   1183  CE1 PHE   155     124.849 118.278  50.889  0.00  0.00           C  
ATOM   1184  CE2 PHE   155     125.600 117.100  52.835  0.00  0.00           C  
ATOM   1185  CZ  PHE   155     124.975 117.112  51.592  0.00  0.00           C  
ATOM   1186  N   ASP   156     123.811 122.573  52.056  0.00  0.00           N  
ATOM   1187  CA  ASP   156     123.259 123.596  51.178  0.00  0.00           C  
ATOM   1188  C   ASP   156     122.689 124.827  51.872  0.00  0.00           C  
ATOM   1189  O   ASP   156     122.797 125.932  51.381  0.00  0.00           O  
ATOM   1190  CB  ASP   156     122.242 123.032  50.198  0.00  0.00           C  
ATOM   1191  CG  ASP   156     122.841 122.067  49.123  0.00  0.00           C  
ATOM   1192  OD1 ASP   156     124.095 122.063  48.889  0.00  0.00           O  
ATOM   1193  OD2 ASP   156     122.160 121.399  48.339  0.00  0.00           O1-
ATOM   1194  N   ALA   157     122.240 124.677  53.119  0.00  0.00           N  
ATOM   1195  CA  ALA   157     121.318 125.613  53.797  0.00  0.00           C  
ATOM   1196  C   ALA   157     122.093 126.919  54.076  0.00  0.00           C  
ATOM   1197  O   ALA   157     123.194 126.970  54.585  0.00  0.00           O  
ATOM   1198  CB  ALA   157     120.628 124.863  54.935  0.00  0.00           C  
ATOM   1199  N   LYS   158     121.364 128.066  53.837  0.00  0.00           N  
ATOM   1200  CA  LYS   158     121.757 129.440  53.945  0.00  0.00           C  
ATOM   1201  C   LYS   158     120.532 130.446  53.970  0.00  0.00           C  
ATOM   1202  O   LYS   158     119.525 130.092  53.252  0.00  0.00           O  
ATOM   1203  CB  LYS   158     122.718 129.714  52.744  0.00  0.00           C  
ATOM   1204  CG  LYS   158     123.363 131.036  52.570  0.00  0.00           C  
ATOM   1205  CD  LYS   158     124.534 130.958  51.583  0.00  0.00           C  
ATOM   1206  CE  LYS   158     124.946 132.367  51.334  0.00  0.00           C  
ATOM   1207  NZ  LYS   158     126.412 132.517  51.252  0.00  0.00           N1+
ATOM   1208  OXT LYS   158     120.601 131.570  54.511  0.00  0.00           O1-
ATOM   1209  N   PHE   159      79.258  67.754  92.386  0.00  0.00           N  
ATOM   1210  CA  PHE   159      78.352  67.638  91.304  0.00  0.00           C  
ATOM   1211  C   PHE   159      78.444  68.641  90.256  0.00  0.00           C  
ATOM   1212  O   PHE   159      77.977  69.727  90.538  0.00  0.00           O  
ATOM   1213  CB  PHE   159      76.869  67.500  91.761  0.00  0.00           C  
ATOM   1214  CG  PHE   159      76.455  66.099  92.191  0.00  0.00           C  
ATOM   1215  CD1 PHE   159      76.262  65.741  93.536  0.00  0.00           C  
ATOM   1216  CD2 PHE   159      76.342  65.078  91.170  0.00  0.00           C  
ATOM   1217  CE1 PHE   159      75.971  64.376  93.876  0.00  0.00           C  
ATOM   1218  CE2 PHE   159      76.137  63.744  91.566  0.00  0.00           C  
ATOM   1219  CZ  PHE   159      75.895  63.432  92.862  0.00  0.00           C  
ATOM   1220  N   THR   160      79.003  68.335  89.112  0.00  0.00           N  
ATOM   1221  CA  THR   160      79.061  69.156  87.916  0.00  0.00           C  
ATOM   1222  C   THR   160      79.645  70.552  88.112  0.00  0.00           C  
ATOM   1223  O   THR   160      80.863  70.646  87.806  0.00  0.00           O  
ATOM   1224  CB  THR   160      77.757  69.184  86.981  0.00  0.00           C  
ATOM   1225  CG2 THR   160      77.133  67.871  86.822  0.00  0.00           C  
ATOM   1226  OG1 THR   160      76.782  69.974  87.547  0.00  0.00           O  
ATOM   1227  N   LEU   161      78.948  71.575  88.572  0.00  0.00           N  
ATOM   1228  CA  LEU   161      79.433  72.952  88.505  0.00  0.00           C  
ATOM   1229  C   LEU   161      80.770  73.053  89.130  0.00  0.00           C  
ATOM   1230  O   LEU   161      80.956  72.616  90.250  0.00  0.00           O  
ATOM   1231  CB  LEU   161      78.349  73.864  89.161  0.00  0.00           C  
ATOM   1232  CG  LEU   161      78.773  75.296  89.425  0.00  0.00           C  
ATOM   1233  CD1 LEU   161      79.020  76.074  88.135  0.00  0.00           C  
ATOM   1234  CD2 LEU   161      77.688  76.008  90.212  0.00  0.00           C  
ATOM   1235  N   ILE   162      81.681  73.717  88.434  0.00  0.00           N  
ATOM   1236  CA  ILE   162      82.960  74.262  88.980  0.00  0.00           C  
ATOM   1237  C   ILE   162      83.360  75.569  88.333  0.00  0.00           C  
ATOM   1238  O   ILE   162      84.106  76.355  88.997  0.00  0.00           O  
ATOM   1239  CB  ILE   162      84.183  73.266  88.797  0.00  0.00           C  
ATOM   1240  CG1 ILE   162      84.048  72.062  87.799  0.00  0.00           C  
ATOM   1241  CG2 ILE   162      84.656  72.741  90.150  0.00  0.00           C  
ATOM   1242  CD1 ILE   162      83.672  72.394  86.326  0.00  0.00           C  
ATOM   1243  N   GLU   163      82.865  75.867  87.101  0.00  0.00           N  
ATOM   1244  CA  GLU   163      83.173  77.019  86.300  0.00  0.00           C  
ATOM   1245  C   GLU   163      82.990  78.401  87.029  0.00  0.00           C  
ATOM   1246  O   GLU   163      83.894  79.213  86.916  0.00  0.00           O  
ATOM   1247  CB  GLU   163      82.474  77.014  84.928  0.00  0.00           C  
ATOM   1248  CG  GLU   163      80.951  76.879  84.789  0.00  0.00           C  
ATOM   1249  CD  GLU   163      80.490  75.405  84.700  0.00  0.00           C  
ATOM   1250  OE1 GLU   163      80.715  74.720  85.690  0.00  0.00           O  
ATOM   1251  OE2 GLU   163      79.843  74.943  83.708  0.00  0.00           O1-
ATOM   1252  N   LEU   164      81.912  78.600  87.770  0.00  0.00           N  
ATOM   1253  CA  LEU   164      81.769  79.739  88.709  0.00  0.00           C  
ATOM   1254  C   LEU   164      82.969  79.931  89.681  0.00  0.00           C  
ATOM   1255  O   LEU   164      83.480  81.030  89.811  0.00  0.00           O  
ATOM   1256  CB  LEU   164      80.497  79.539  89.532  0.00  0.00           C  
ATOM   1257  CG  LEU   164      80.103  80.746  90.524  0.00  0.00           C  
ATOM   1258  CD1 LEU   164      79.795  82.085  89.892  0.00  0.00           C  
ATOM   1259  CD2 LEU   164      78.972  80.192  91.398  0.00  0.00           C  
ATOM   1260  N   MET   165      83.346  78.853  90.412  0.00  0.00           N  
ATOM   1261  CA  MET   165      84.386  78.764  91.427  0.00  0.00           C  
ATOM   1262  C   MET   165      85.822  78.860  90.909  0.00  0.00           C  
ATOM   1263  O   MET   165      86.725  79.163  91.732  0.00  0.00           O  
ATOM   1264  CB  MET   165      84.317  77.395  92.148  0.00  0.00           C  
ATOM   1265  CG  MET   165      82.999  77.243  92.949  0.00  0.00           C  
ATOM   1266  SD  MET   165      82.612  78.526  94.105  0.00  0.00           S  
ATOM   1267  CE  MET   165      84.078  78.492  95.210  0.00  0.00           C  
ATOM   1268  N   ILE   166      86.004  78.584  89.575  0.00  0.00           N  
ATOM   1269  CA  ILE   166      87.203  78.830  88.805  0.00  0.00           C  
ATOM   1270  C   ILE   166      87.298  80.283  88.501  0.00  0.00           C  
ATOM   1271  O   ILE   166      88.322  80.899  88.759  0.00  0.00           O  
ATOM   1272  CB  ILE   166      87.396  77.918  87.541  0.00  0.00           C  
ATOM   1273  CG1 ILE   166      88.263  76.580  87.750  0.00  0.00           C  
ATOM   1274  CG2 ILE   166      87.796  78.656  86.266  0.00  0.00           C  
ATOM   1275  CD1 ILE   166      87.768  75.736  88.938  0.00  0.00           C  
ATOM   1276  N   VAL   167      86.245  80.907  87.966  0.00  0.00           N  
ATOM   1277  CA  VAL   167      86.227  82.344  87.886  0.00  0.00           C  
ATOM   1278  C   VAL   167      86.412  83.049  89.218  0.00  0.00           C  
ATOM   1279  O   VAL   167      87.165  84.018  89.278  0.00  0.00           O  
ATOM   1280  CB  VAL   167      84.939  82.783  87.237  0.00  0.00           C  
ATOM   1281  CG1 VAL   167      84.676  84.248  87.000  0.00  0.00           C  
ATOM   1282  CG2 VAL   167      84.806  82.100  85.832  0.00  0.00           C  
ATOM   1283  N   ILE   168      85.697  82.703  90.327  0.00  0.00           N  
ATOM   1284  CA  ILE   168      85.819  83.382  91.665  0.00  0.00           C  
ATOM   1285  C   ILE   168      87.227  83.287  92.216  0.00  0.00           C  
ATOM   1286  O   ILE   168      87.763  84.352  92.577  0.00  0.00           O  
ATOM   1287  CB  ILE   168      84.807  82.885  92.704  0.00  0.00           C  
ATOM   1288  CG1 ILE   168      83.423  83.380  92.401  0.00  0.00           C  
ATOM   1289  CG2 ILE   168      85.191  83.291  94.207  0.00  0.00           C  
ATOM   1290  CD1 ILE   168      82.258  83.041  93.316  0.00  0.00           C  
ATOM   1291  N   ALA   169      87.905  82.080  92.133  0.00  0.00           N  
ATOM   1292  CA  ALA   169      89.300  82.005  92.527  0.00  0.00           C  
ATOM   1293  C   ALA   169      90.134  82.922  91.618  0.00  0.00           C  
ATOM   1294  O   ALA   169      90.990  83.726  92.139  0.00  0.00           O  
ATOM   1295  CB  ALA   169      89.704  80.533  92.459  0.00  0.00           C  
ATOM   1296  N   ILE   170      89.977  82.923  90.294  0.00  0.00           N  
ATOM   1297  CA  ILE   170      90.852  83.665  89.339  0.00  0.00           C  
ATOM   1298  C   ILE   170      90.690  85.170  89.607  0.00  0.00           C  
ATOM   1299  O   ILE   170      91.711  85.852  89.640  0.00  0.00           O  
ATOM   1300  CB  ILE   170      90.498  83.298  87.851  0.00  0.00           C  
ATOM   1301  CG1 ILE   170      91.077  81.859  87.585  0.00  0.00           C  
ATOM   1302  CG2 ILE   170      90.881  84.374  86.837  0.00  0.00           C  
ATOM   1303  CD1 ILE   170      92.508  81.642  87.344  0.00  0.00           C  
ATOM   1304  N   VAL   171      89.497  85.684  89.915  0.00  0.00           N  
ATOM   1305  CA  VAL   171      89.277  87.138  90.292  0.00  0.00           C  
ATOM   1306  C   VAL   171      90.073  87.416  91.554  0.00  0.00           C  
ATOM   1307  O   VAL   171      90.660  88.489  91.652  0.00  0.00           O  
ATOM   1308  CB  VAL   171      87.797  87.464  90.438  0.00  0.00           C  
ATOM   1309  CG1 VAL   171      87.650  88.834  91.091  0.00  0.00           C  
ATOM   1310  CG2 VAL   171      87.207  87.344  89.038  0.00  0.00           C  
ATOM   1311  N   GLY   172      90.124  86.545  92.595  0.00  0.00           N  
ATOM   1312  CA  GLY   172      90.947  86.604  93.850  0.00  0.00           C  
ATOM   1313  C   GLY   172      92.443  86.434  93.624  0.00  0.00           C  
ATOM   1314  O   GLY   172      93.257  87.207  94.171  0.00  0.00           O  
ATOM   1315  N   ILE   173      92.812  85.610  92.640  0.00  0.00           N  
ATOM   1316  CA  ILE   173      94.193  85.708  92.104  0.00  0.00           C  
ATOM   1317  C   ILE   173      94.546  87.046  91.443  0.00  0.00           C  
ATOM   1318  O   ILE   173      95.519  87.632  91.815  0.00  0.00           O  
ATOM   1319  CB  ILE   173      94.508  84.456  91.236  0.00  0.00           C  
ATOM   1320  CG1 ILE   173      94.582  83.189  92.118  0.00  0.00           C  
ATOM   1321  CG2 ILE   173      95.939  84.638  90.627  0.00  0.00           C  
ATOM   1322  CD1 ILE   173      94.028  81.929  91.401  0.00  0.00           C  
ATOM   1323  N   LEU   174      93.732  87.507  90.465  0.00  0.00           N  
ATOM   1324  CA  LEU   174      94.006  88.818  89.784  0.00  0.00           C  
ATOM   1325  C   LEU   174      94.129  89.943  90.793  0.00  0.00           C  
ATOM   1326  O   LEU   174      94.942  90.785  90.616  0.00  0.00           O  
ATOM   1327  CB  LEU   174      92.783  88.948  88.889  0.00  0.00           C  
ATOM   1328  CG  LEU   174      92.500  90.308  88.236  0.00  0.00           C  
ATOM   1329  CD1 LEU   174      93.540  90.673  87.168  0.00  0.00           C  
ATOM   1330  CD2 LEU   174      91.086  90.463  87.526  0.00  0.00           C  
ATOM   1331  N   ALA   175      93.324  89.911  91.896  0.00  0.00           N  
ATOM   1332  CA  ALA   175      93.462  90.854  93.004  0.00  0.00           C  
ATOM   1333  C   ALA   175      94.778  90.720  93.845  0.00  0.00           C  
ATOM   1334  O   ALA   175      95.245  91.708  94.328  0.00  0.00           O  
ATOM   1335  CB  ALA   175      92.162  90.753  93.892  0.00  0.00           C  
ATOM   1336  N   ALA   176      95.358  89.509  93.938  0.00  0.00           N  
ATOM   1337  CA  ALA   176      96.711  89.287  94.503  0.00  0.00           C  
ATOM   1338  C   ALA   176      97.845  89.859  93.533  0.00  0.00           C  
ATOM   1339  O   ALA   176      98.846  90.442  94.037  0.00  0.00           O  
ATOM   1340  CB  ALA   176      96.839  87.784  94.594  0.00  0.00           C  
ATOM   1341  N   VAL   177      97.680  89.761  92.216  0.00  0.00           N  
ATOM   1342  CA  VAL   177      98.530  90.504  91.259  0.00  0.00           C  
ATOM   1343  C   VAL   177      98.354  92.019  91.366  0.00  0.00           C  
ATOM   1344  O   VAL   177      99.343  92.746  91.182  0.00  0.00           O  
ATOM   1345  CB  VAL   177      98.400  90.150  89.774  0.00  0.00           C  
ATOM   1346  CG1 VAL   177      99.597  90.608  88.953  0.00  0.00           C  
ATOM   1347  CG2 VAL   177      98.120  88.627  89.487  0.00  0.00           C  
ATOM   1348  N   ALA   178      97.167  92.541  91.669  0.00  0.00           N  
ATOM   1349  CA  ALA   178      96.922  94.013  91.796  0.00  0.00           C  
ATOM   1350  C   ALA   178      97.592  94.699  93.044  0.00  0.00           C  
ATOM   1351  O   ALA   178      97.757  95.924  93.038  0.00  0.00           O  
ATOM   1352  CB  ALA   178      95.453  94.411  91.911  0.00  0.00           C  
ATOM   1353  N   LEU   179      98.139  93.972  93.976  0.00  0.00           N  
ATOM   1354  CA  LEU   179      98.773  94.431  95.190  0.00  0.00           C  
ATOM   1355  C   LEU   179     100.086  95.094  94.837  0.00  0.00           C  
ATOM   1356  O   LEU   179     100.167  96.293  94.934  0.00  0.00           O  
ATOM   1357  CB  LEU   179      98.686  93.288  96.246  0.00  0.00           C  
ATOM   1358  CG  LEU   179      99.542  93.566  97.543  0.00  0.00           C  
ATOM   1359  CD1 LEU   179      99.131  94.876  98.267  0.00  0.00           C  
ATOM   1360  CD2 LEU   179      99.363  92.298  98.500  0.00  0.00           C  
ATOM   1361  N   PRO   180     101.122  94.311  94.408  0.00  0.00           N  
ATOM   1362  CA  PRO   180     102.401  94.875  94.083  0.00  0.00           C  
ATOM   1363  C   PRO   180     102.259  95.894  92.923  0.00  0.00           C  
ATOM   1364  O   PRO   180     102.920  96.895  92.853  0.00  0.00           O  
ATOM   1365  CB  PRO   180     103.352  93.703  93.711  0.00  0.00           C  
ATOM   1366  CG  PRO   180     102.510  92.434  93.795  0.00  0.00           C  
ATOM   1367  CD  PRO   180     101.315  92.847  94.551  0.00  0.00           C  
ATOM   1368  N   ALA   181     101.499  95.624  91.877  0.00  0.00           N  
ATOM   1369  CA  ALA   181     101.273  96.520  90.818  0.00  0.00           C  
ATOM   1370  C   ALA   181     100.576  97.895  91.150  0.00  0.00           C  
ATOM   1371  O   ALA   181     101.153  98.871  90.668  0.00  0.00           O  
ATOM   1372  CB  ALA   181     100.423  95.803  89.784  0.00  0.00           C  
ATOM   1373  N   TYR   182      99.441  98.055  91.840  0.00  0.00           N  
ATOM   1374  CA  TYR   182      98.978  99.420  92.247  0.00  0.00           C  
ATOM   1375  C   TYR   182      99.981 100.070  93.179  0.00  0.00           C  
ATOM   1376  O   TYR   182      99.925 101.308  93.270  0.00  0.00           O  
ATOM   1377  CB  TYR   182      97.663  99.282  93.004  0.00  0.00           C  
ATOM   1378  CG  TYR   182      96.761 100.485  93.145  0.00  0.00           C  
ATOM   1379  CD1 TYR   182      95.997 100.927  92.070  0.00  0.00           C  
ATOM   1380  CD2 TYR   182      97.029 101.372  94.197  0.00  0.00           C  
ATOM   1381  CE1 TYR   182      95.420 102.207  92.131  0.00  0.00           C  
ATOM   1382  CE2 TYR   182      96.415 102.649  94.291  0.00  0.00           C  
ATOM   1383  CZ  TYR   182      95.608 103.089  93.246  0.00  0.00           C  
ATOM   1384  OH  TYR   182      95.011 104.326  93.366  0.00  0.00           O  
ATOM   1385  N   GLN   183     100.765  99.349  94.030  0.00  0.00           N  
ATOM   1386  CA  GLN   183     101.704  99.876  95.033  0.00  0.00           C  
ATOM   1387  C   GLN   183     102.879 100.505  94.228  0.00  0.00           C  
ATOM   1388  O   GLN   183     103.025 101.719  94.181  0.00  0.00           O  
ATOM   1389  CB  GLN   183     102.294  98.733  95.904  0.00  0.00           C  
ATOM   1390  CG  GLN   183     101.417  98.510  97.122  0.00  0.00           C  
ATOM   1391  CD  GLN   183     102.005  97.567  98.235  0.00  0.00           C  
ATOM   1392  NE2 GLN   183     101.344  97.333  99.356  0.00  0.00           N  
ATOM   1393  OE1 GLN   183     103.096  97.008  98.138  0.00  0.00           O  
ATOM   1394  N   ASP   184     103.662  99.788  93.446  0.00  0.00           N  
ATOM   1395  CA  ASP   184     104.919 100.224  92.759  0.00  0.00           C  
ATOM   1396  C   ASP   184     104.723 101.369  91.733  0.00  0.00           C  
ATOM   1397  O   ASP   184     105.536 102.330  91.710  0.00  0.00           O  
ATOM   1398  CB  ASP   184     105.529  98.955  92.136  0.00  0.00           C  
ATOM   1399  CG  ASP   184     105.855  99.010  90.685  0.00  0.00           C  
ATOM   1400  OD1 ASP   184     106.986  99.552  90.426  0.00  0.00           O  
ATOM   1401  OD2 ASP   184     104.967  98.688  89.847  0.00  0.00           O1-
ATOM   1402  N   TYR   185     103.649 101.277  91.050  0.00  0.00           N  
ATOM   1403  CA  TYR   185     103.188 102.416  90.202  0.00  0.00           C  
ATOM   1404  C   TYR   185     102.713 103.660  91.019  0.00  0.00           C  
ATOM   1405  O   TYR   185     103.302 104.714  90.771  0.00  0.00           O  
ATOM   1406  CB  TYR   185     102.155 101.868  89.130  0.00  0.00           C  
ATOM   1407  CG  TYR   185     101.365 102.948  88.415  0.00  0.00           C  
ATOM   1408  CD1 TYR   185     102.012 103.775  87.527  0.00  0.00           C  
ATOM   1409  CD2 TYR   185      99.972 102.938  88.543  0.00  0.00           C  
ATOM   1410  CE1 TYR   185     101.271 104.788  86.807  0.00  0.00           C  
ATOM   1411  CE2 TYR   185      99.203 103.906  87.799  0.00  0.00           C  
ATOM   1412  CZ  TYR   185      99.872 104.829  86.962  0.00  0.00           C  
ATOM   1413  OH  TYR   185      99.144 105.585  86.185  0.00  0.00           O  
ATOM   1414  N   THR   186     101.651 103.657  91.854  0.00  0.00           N  
ATOM   1415  CA  THR   186     101.407 104.865  92.678  0.00  0.00           C  
ATOM   1416  C   THR   186     102.584 105.327  93.541  0.00  0.00           C  
ATOM   1417  O   THR   186     102.686 106.513  93.663  0.00  0.00           O  
ATOM   1418  CB  THR   186     100.092 104.746  93.467  0.00  0.00           C  
ATOM   1419  CG2 THR   186      98.848 104.544  92.535  0.00  0.00           C  
ATOM   1420  OG1 THR   186     100.175 103.780  94.445  0.00  0.00           O  
ATOM   1421  N   ALA   187     103.585 104.495  93.853  0.00  0.00           N  
ATOM   1422  CA  ALA   187     104.765 104.940  94.583  0.00  0.00           C  
ATOM   1423  C   ALA   187     105.621 106.027  93.809  0.00  0.00           C  
ATOM   1424  O   ALA   187     105.856 107.077  94.306  0.00  0.00           O  
ATOM   1425  CB  ALA   187     105.616 103.697  94.829  0.00  0.00           C  
ATOM   1426  N   ARG   188     106.027 105.757  92.600  0.00  0.00           N  
ATOM   1427  CA  ARG   188     106.730 106.728  91.797  0.00  0.00           C  
ATOM   1428  C   ARG   188     105.896 107.974  91.446  0.00  0.00           C  
ATOM   1429  O   ARG   188     106.446 109.035  91.298  0.00  0.00           O  
ATOM   1430  CB  ARG   188     107.442 106.205  90.590  0.00  0.00           C  
ATOM   1431  CG  ARG   188     106.792 106.398  89.188  0.00  0.00           C  
ATOM   1432  CD  ARG   188     105.534 105.521  88.992  0.00  0.00           C  
ATOM   1433  NE  ARG   188     105.354 105.345  87.528  0.00  0.00           N  
ATOM   1434  CZ  ARG   188     105.760 104.395  86.773  0.00  0.00           C  
ATOM   1435  NH1 ARG   188     106.336 103.296  87.109  0.00  0.00           N1+
ATOM   1436  NH2 ARG   188     105.486 104.445  85.550  0.00  0.00           N  
ATOM   1437  N   ALA   189     104.604 107.859  91.371  0.00  0.00           N  
ATOM   1438  CA  ALA   189     103.642 108.968  91.229  0.00  0.00           C  
ATOM   1439  C   ALA   189     103.530 109.862  92.424  0.00  0.00           C  
ATOM   1440  O   ALA   189     103.418 111.070  92.246  0.00  0.00           O  
ATOM   1441  CB  ALA   189     102.276 108.427  90.640  0.00  0.00           C  
ATOM   1442  N   GLN   190     103.589 109.399  93.642  0.00  0.00           N  
ATOM   1443  CA  GLN   190     103.914 110.160  94.875  0.00  0.00           C  
ATOM   1444  C   GLN   190     105.325 110.744  94.913  0.00  0.00           C  
ATOM   1445  O   GLN   190     105.397 111.981  94.989  0.00  0.00           O  
ATOM   1446  CB  GLN   190     103.727 109.129  96.047  0.00  0.00           C  
ATOM   1447  CG  GLN   190     102.262 108.725  96.270  0.00  0.00           C  
ATOM   1448  CD  GLN   190     102.055 107.216  96.647  0.00  0.00           C  
ATOM   1449  NE2 GLN   190     100.878 106.703  96.619  0.00  0.00           N  
ATOM   1450  OE1 GLN   190     102.948 106.531  97.152  0.00  0.00           O  
ATOM   1451  N   VAL   191     106.474 109.965  94.677  0.00  0.00           N  
ATOM   1452  CA  VAL   191     107.825 110.446  94.761  0.00  0.00           C  
ATOM   1453  C   VAL   191     108.012 111.629  93.807  0.00  0.00           C  
ATOM   1454  O   VAL   191     108.497 112.626  94.283  0.00  0.00           O  
ATOM   1455  CB  VAL   191     108.790 109.366  94.333  0.00  0.00           C  
ATOM   1456  CG1 VAL   191     110.210 109.860  94.009  0.00  0.00           C  
ATOM   1457  CG2 VAL   191     109.011 108.440  95.520  0.00  0.00           C  
ATOM   1458  N   SER   192     107.561 111.497  92.535  0.00  0.00           N  
ATOM   1459  CA  SER   192     107.560 112.579  91.517  0.00  0.00           C  
ATOM   1460  C   SER   192     106.723 113.794  91.787  0.00  0.00           C  
ATOM   1461  O   SER   192     107.095 114.883  91.230  0.00  0.00           O  
ATOM   1462  CB  SER   192     107.231 111.949  90.116  0.00  0.00           C  
ATOM   1463  OG  SER   192     105.990 111.369  90.095  0.00  0.00           O  
ATOM   1464  N   GLU   193     105.711 113.725  92.621  0.00  0.00           N  
ATOM   1465  CA  GLU   193     105.060 114.982  93.122  0.00  0.00           C  
ATOM   1466  C   GLU   193     106.084 115.786  94.053  0.00  0.00           C  
ATOM   1467  O   GLU   193     106.125 117.014  93.932  0.00  0.00           O  
ATOM   1468  CB  GLU   193     103.756 114.596  93.893  0.00  0.00           C  
ATOM   1469  CG  GLU   193     102.962 115.886  93.928  0.00  0.00           C  
ATOM   1470  CD  GLU   193     101.619 115.650  94.663  0.00  0.00           C  
ATOM   1471  OE1 GLU   193     101.500 115.170  95.825  0.00  0.00           O  
ATOM   1472  OE2 GLU   193     100.547 116.002  94.016  0.00  0.00           O1-
ATOM   1473  N   ALA   194     106.813 115.114  94.920  0.00  0.00           N  
ATOM   1474  CA  ALA   194     107.794 115.721  95.837  0.00  0.00           C  
ATOM   1475  C   ALA   194     108.859 116.531  95.044  0.00  0.00           C  
ATOM   1476  O   ALA   194     109.153 117.705  95.362  0.00  0.00           O  
ATOM   1477  CB  ALA   194     108.453 114.759  96.815  0.00  0.00           C  
ATOM   1478  N   ILE   195     109.365 115.920  93.925  0.00  0.00           N  
ATOM   1479  CA  ILE   195     110.423 116.551  93.048  0.00  0.00           C  
ATOM   1480  C   ILE   195     109.751 117.709  92.309  0.00  0.00           C  
ATOM   1481  O   ILE   195     110.333 118.781  92.065  0.00  0.00           O  
ATOM   1482  CB  ILE   195     111.016 115.530  91.932  0.00  0.00           C  
ATOM   1483  CG1 ILE   195     111.302 114.048  92.385  0.00  0.00           C  
ATOM   1484  CG2 ILE   195     112.229 116.067  91.290  0.00  0.00           C  
ATOM   1485  CD1 ILE   195     112.244 113.914  93.608  0.00  0.00           C  
ATOM   1486  N   LEU   196     108.531 117.527  91.802  0.00  0.00           N  
ATOM   1487  CA  LEU   196     107.800 118.527  90.984  0.00  0.00           C  
ATOM   1488  C   LEU   196     107.672 119.873  91.784  0.00  0.00           C  
ATOM   1489  O   LEU   196     107.734 120.953  91.274  0.00  0.00           O  
ATOM   1490  CB  LEU   196     106.365 118.037  90.633  0.00  0.00           C  
ATOM   1491  CG  LEU   196     105.450 119.100  90.036  0.00  0.00           C  
ATOM   1492  CD1 LEU   196     105.677 119.284  88.542  0.00  0.00           C  
ATOM   1493  CD2 LEU   196     103.942 118.772  90.101  0.00  0.00           C  
ATOM   1494  N   LEU   197     107.414 119.705  93.097  0.00  0.00           N  
ATOM   1495  CA  LEU   197     107.193 120.878  94.042  0.00  0.00           C  
ATOM   1496  C   LEU   197     108.489 121.405  94.719  0.00  0.00           C  
ATOM   1497  O   LEU   197     108.567 122.494  95.337  0.00  0.00           O  
ATOM   1498  CB  LEU   197     106.042 120.467  94.970  0.00  0.00           C  
ATOM   1499  CG  LEU   197     104.721 120.095  94.303  0.00  0.00           C  
ATOM   1500  CD1 LEU   197     103.620 119.693  95.239  0.00  0.00           C  
ATOM   1501  CD2 LEU   197     104.254 121.036  93.253  0.00  0.00           C  
ATOM   1502  N   ALA   198     109.533 120.660  94.420  0.00  0.00           N  
ATOM   1503  CA  ALA   198     110.929 120.892  94.848  0.00  0.00           C  
ATOM   1504  C   ALA   198     111.596 121.636  93.700  0.00  0.00           C  
ATOM   1505  O   ALA   198     112.343 122.566  94.020  0.00  0.00           O  
ATOM   1506  CB  ALA   198     111.651 119.644  95.259  0.00  0.00           C  
ATOM   1507  N   GLU   199     111.235 121.420  92.448  0.00  0.00           N  
ATOM   1508  CA  GLU   199     111.350 122.423  91.355  0.00  0.00           C  
ATOM   1509  C   GLU   199     110.642 123.714  91.539  0.00  0.00           C  
ATOM   1510  O   GLU   199     109.728 123.813  92.392  0.00  0.00           O  
ATOM   1511  CB  GLU   199     110.983 121.825  89.943  0.00  0.00           C  
ATOM   1512  CG  GLU   199     112.161 121.068  89.245  0.00  0.00           C  
ATOM   1513  CD  GLU   199     113.261 121.957  88.689  0.00  0.00           C  
ATOM   1514  OE1 GLU   199     113.355 123.183  88.930  0.00  0.00           O  
ATOM   1515  OE2 GLU   199     114.192 121.448  88.020  0.00  0.00           O1-
ATOM   1516  N   GLY   200     111.152 124.770  90.891  0.00  0.00           N  
ATOM   1517  CA  GLY   200     110.776 126.109  91.339  0.00  0.00           C  
ATOM   1518  C   GLY   200     111.424 126.526  92.689  0.00  0.00           C  
ATOM   1519  O   GLY   200     112.171 127.505  92.696  0.00  0.00           O  
ATOM   1520  N   GLN   201     111.275 125.671  93.753  0.00  0.00           N  
ATOM   1521  CA  GLN   201     111.808 125.911  95.075  0.00  0.00           C  
ATOM   1522  C   GLN   201     113.354 125.879  95.021  0.00  0.00           C  
ATOM   1523  O   GLN   201     113.965 126.837  95.492  0.00  0.00           O  
ATOM   1524  CB  GLN   201     111.126 124.878  96.043  0.00  0.00           C  
ATOM   1525  CG  GLN   201     111.083 125.469  97.488  0.00  0.00           C  
ATOM   1526  CD  GLN   201     109.915 126.420  97.701  0.00  0.00           C  
ATOM   1527  NE2 GLN   201     109.575 126.681  98.893  0.00  0.00           N  
ATOM   1528  OE1 GLN   201     109.306 126.879  96.796  0.00  0.00           O  
ATOM   1529  N   LYS   202     113.956 124.993  94.252  0.00  0.00           N  
ATOM   1530  CA  LYS   202     115.279 125.046  93.672  0.00  0.00           C  
ATOM   1531  C   LYS   202     115.746 126.335  92.925  0.00  0.00           C  
ATOM   1532  O   LYS   202     116.847 126.879  93.138  0.00  0.00           O  
ATOM   1533  CB  LYS   202     115.446 123.783  92.783  0.00  0.00           C  
ATOM   1534  CG  LYS   202     116.157 123.843  91.449  0.00  0.00           C  
ATOM   1535  CD  LYS   202     116.262 122.422  90.840  0.00  0.00           C  
ATOM   1536  CE  LYS   202     116.944 122.351  89.402  0.00  0.00           C  
ATOM   1537  NZ  LYS   202     116.165 123.220  88.383  0.00  0.00           N1+
ATOM   1538  N   SER   203     114.982 126.855  91.925  0.00  0.00           N  
ATOM   1539  CA  SER   203     115.381 128.057  91.102  0.00  0.00           C  
ATOM   1540  C   SER   203     115.504 129.252  92.069  0.00  0.00           C  
ATOM   1541  O   SER   203     116.513 129.958  92.028  0.00  0.00           O  
ATOM   1542  CB  SER   203     114.496 128.369  89.889  0.00  0.00           C  
ATOM   1543  OG  SER   203     114.131 127.181  89.151  0.00  0.00           O  
ATOM   1544  N   ALA   204     114.625 129.335  93.103  0.00  0.00           N  
ATOM   1545  CA  ALA   204     114.640 130.445  94.045  0.00  0.00           C  
ATOM   1546  C   ALA   204     115.856 130.431  95.017  0.00  0.00           C  
ATOM   1547  O   ALA   204     116.361 131.523  95.435  0.00  0.00           O  
ATOM   1548  CB  ALA   204     113.285 130.325  94.793  0.00  0.00           C  
ATOM   1549  N   VAL   205     116.310 129.217  95.323  0.00  0.00           N  
ATOM   1550  CA  VAL   205     117.530 128.972  96.144  0.00  0.00           C  
ATOM   1551  C   VAL   205     118.804 129.201  95.295  0.00  0.00           C  
ATOM   1552  O   VAL   205     119.838 129.597  95.765  0.00  0.00           O  
ATOM   1553  CB  VAL   205     117.562 127.486  96.595  0.00  0.00           C  
ATOM   1554  CG1 VAL   205     118.939 126.976  96.962  0.00  0.00           C  
ATOM   1555  CG2 VAL   205     116.736 127.342  97.882  0.00  0.00           C  
ATOM   1556  N   THR   206     118.760 128.947  94.015  0.00  0.00           N  
ATOM   1557  CA  THR   206     119.864 129.085  93.042  0.00  0.00           C  
ATOM   1558  C   THR   206     120.196 130.556  92.756  0.00  0.00           C  
ATOM   1559  O   THR   206     121.351 130.936  92.960  0.00  0.00           O  
ATOM   1560  CB  THR   206     119.420 128.549  91.646  0.00  0.00           C  
ATOM   1561  CG2 THR   206     120.379 128.802  90.391  0.00  0.00           C  
ATOM   1562  OG1 THR   206     119.169 127.170  91.754  0.00  0.00           O  
ATOM   1563  N   GLU   207     119.133 131.350  92.508  0.00  0.00           N  
ATOM   1564  CA  GLU   207     119.214 132.827  92.482  0.00  0.00           C  
ATOM   1565  C   GLU   207     119.901 133.437  93.750  0.00  0.00           C  
ATOM   1566  O   GLU   207     120.872 134.195  93.542  0.00  0.00           O  
ATOM   1567  CB  GLU   207     117.794 133.434  92.303  0.00  0.00           C  
ATOM   1568  CG  GLU   207     117.286 133.209  90.774  0.00  0.00           C  
ATOM   1569  CD  GLU   207     116.413 134.328  90.221  0.00  0.00           C  
ATOM   1570  OE1 GLU   207     115.893 135.241  90.862  0.00  0.00           O  
ATOM   1571  OE2 GLU   207     116.191 134.330  88.925  0.00  0.00           O1-
ATOM   1572  N   TYR   208     119.376 133.071  94.962  0.00  0.00           N  
ATOM   1573  CA  TYR   208     119.906 133.480  96.256  0.00  0.00           C  
ATOM   1574  C   TYR   208     121.440 133.194  96.306  0.00  0.00           C  
ATOM   1575  O   TYR   208     122.264 134.121  96.362  0.00  0.00           O  
ATOM   1576  CB  TYR   208     119.186 132.773  97.398  0.00  0.00           C  
ATOM   1577  CG  TYR   208     119.570 133.206  98.799  0.00  0.00           C  
ATOM   1578  CD1 TYR   208     118.692 133.931  99.573  0.00  0.00           C  
ATOM   1579  CD2 TYR   208     120.928 133.092  99.268  0.00  0.00           C  
ATOM   1580  CE1 TYR   208     119.116 134.624 100.711  0.00  0.00           C  
ATOM   1581  CE2 TYR   208     121.348 133.799 100.383  0.00  0.00           C  
ATOM   1582  CZ  TYR   208     120.440 134.512 101.181  0.00  0.00           C  
ATOM   1583  OH  TYR   208     120.845 135.135 102.328  0.00  0.00           O  
ATOM   1584  N   TYR   209     121.851 131.942  96.226  0.00  0.00           N  
ATOM   1585  CA  TYR   209     123.160 131.478  96.427  0.00  0.00           C  
ATOM   1586  C   TYR   209     124.235 131.998  95.494  0.00  0.00           C  
ATOM   1587  O   TYR   209     125.235 132.493  95.926  0.00  0.00           O  
ATOM   1588  CB  TYR   209     123.241 129.926  96.632  0.00  0.00           C  
ATOM   1589  CG  TYR   209     124.688 129.551  96.665  0.00  0.00           C  
ATOM   1590  CD1 TYR   209     125.364 129.513  97.931  0.00  0.00           C  
ATOM   1591  CD2 TYR   209     125.400 129.131  95.499  0.00  0.00           C  
ATOM   1592  CE1 TYR   209     126.692 129.099  97.957  0.00  0.00           C  
ATOM   1593  CE2 TYR   209     126.754 128.737  95.608  0.00  0.00           C  
ATOM   1594  CZ  TYR   209     127.404 128.760  96.832  0.00  0.00           C  
ATOM   1595  OH  TYR   209     128.597 128.231  97.003  0.00  0.00           O  
ATOM   1596  N   LEU   210     123.919 132.095  94.202  0.00  0.00           N  
ATOM   1597  CA  LEU   210     124.732 132.678  93.135  0.00  0.00           C  
ATOM   1598  C   LEU   210     124.989 134.206  93.368  0.00  0.00           C  
ATOM   1599  O   LEU   210     126.143 134.613  93.078  0.00  0.00           O  
ATOM   1600  CB  LEU   210     123.931 132.373  91.858  0.00  0.00           C  
ATOM   1601  CG  LEU   210     124.400 133.068  90.532  0.00  0.00           C  
ATOM   1602  CD1 LEU   210     125.903 132.781  90.198  0.00  0.00           C  
ATOM   1603  CD2 LEU   210     123.571 132.492  89.355  0.00  0.00           C  
ATOM   1604  N   ASN   211     123.979 134.949  93.804  0.00  0.00           N  
ATOM   1605  CA  ASN   211     124.035 136.361  94.158  0.00  0.00           C  
ATOM   1606  C   ASN   211     124.760 136.674  95.489  0.00  0.00           C  
ATOM   1607  O   ASN   211     125.627 137.546  95.611  0.00  0.00           O  
ATOM   1608  CB  ASN   211     122.604 137.048  94.183  0.00  0.00           C  
ATOM   1609  CG  ASN   211     122.050 137.448  92.802  0.00  0.00           C  
ATOM   1610  ND2 ASN   211     121.278 136.610  92.186  0.00  0.00           N  
ATOM   1611  OD1 ASN   211     122.449 138.401  92.169  0.00  0.00           O  
ATOM   1612  N   HIE   212     124.433 135.971  96.596  0.00  0.00           N  
ATOM   1613  CA  HIE   212     124.820 136.162  97.986  0.00  0.00           C  
ATOM   1614  C   HIE   212     126.013 135.368  98.481  0.00  0.00           C  
ATOM   1615  O   HIE   212     126.500 135.751  99.584  0.00  0.00           O  
ATOM   1616  CB  HIE   212     123.624 135.963  98.918  0.00  0.00           C  
ATOM   1617  CG  HIE   212     122.718 137.175  98.954  0.00  0.00           C  
ATOM   1618  CD2 HIE   212     122.220 137.763 100.080  0.00  0.00           C  
ATOM   1619  ND1 HIE   212     121.966 137.807  97.858  0.00  0.00           N  
ATOM   1620  CE1 HIE   212     121.218 138.804  98.406  0.00  0.00           C  
ATOM   1621  NE2 HIE   212     121.425 138.873  99.724  0.00  0.00           N  
ATOM   1622  N   GLY   213     126.416 134.378  97.720  0.00  0.00           N  
ATOM   1623  CA  GLY   213     127.552 133.547  98.096  0.00  0.00           C  
ATOM   1624  C   GLY   213     127.500 132.644  99.385  0.00  0.00           C  
ATOM   1625  O   GLY   213     128.536 132.139  99.828  0.00  0.00           O  
ATOM   1626  N   LYS   214     126.336 132.508 100.009  0.00  0.00           N  
ATOM   1627  CA  LYS   214     125.999 131.670 101.164  0.00  0.00           C  
ATOM   1628  C   LYS   214     124.585 131.190 100.942  0.00  0.00           C  
ATOM   1629  O   LYS   214     123.876 131.843 100.129  0.00  0.00           O  
ATOM   1630  CB  LYS   214     126.230 132.461 102.479  0.00  0.00           C  
ATOM   1631  CG  LYS   214     127.698 132.732 102.940  0.00  0.00           C  
ATOM   1632  CD  LYS   214     128.558 131.444 103.201  0.00  0.00           C  
ATOM   1633  CE  LYS   214     129.841 131.925 103.859  0.00  0.00           C  
ATOM   1634  NZ  LYS   214     130.988 131.005 103.712  0.00  0.00           N1+
ATOM   1635  N   TRP   215     124.229 130.022 101.523  0.00  0.00           N  
ATOM   1636  CA  TRP   215     122.916 129.382 101.295  0.00  0.00           C  
ATOM   1637  C   TRP   215     121.855 129.932 102.251  0.00  0.00           C  
ATOM   1638  O   TRP   215     122.088 130.035 103.432  0.00  0.00           O  
ATOM   1639  CB  TRP   215     123.087 127.846 101.403  0.00  0.00           C  
ATOM   1640  CG  TRP   215     124.152 127.159 100.599  0.00  0.00           C  
ATOM   1641  CD1 TRP   215     125.482 127.016 100.806  0.00  0.00           C  
ATOM   1642  CD2 TRP   215     123.982 126.613  99.279  0.00  0.00           C  
ATOM   1643  CE2 TRP   215     125.197 126.122  98.813  0.00  0.00           C  
ATOM   1644  CE3 TRP   215     122.874 126.540  98.422  0.00  0.00           C  
ATOM   1645  NE1 TRP   215     126.055 126.320  99.796  0.00  0.00           N  
ATOM   1646  CZ2 TRP   215     125.371 125.626  97.492  0.00  0.00           C  
ATOM   1647  CZ3 TRP   215     123.052 126.051  97.167  0.00  0.00           C  
ATOM   1648  CH2 TRP   215     124.285 125.587  96.659  0.00  0.00           C  
ATOM   1649  N   PRO   216     120.611 130.083 101.767  0.00  0.00           N  
ATOM   1650  CA  PRO   216     119.479 130.534 102.501  0.00  0.00           C  
ATOM   1651  C   PRO   216     118.896 129.478 103.474  0.00  0.00           C  
ATOM   1652  O   PRO   216     118.619 128.380 103.152  0.00  0.00           O  
ATOM   1653  CB  PRO   216     118.493 130.962 101.486  0.00  0.00           C  
ATOM   1654  CG  PRO   216     118.750 130.002 100.282  0.00  0.00           C  
ATOM   1655  CD  PRO   216     120.196 129.729 100.387  0.00  0.00           C  
ATOM   1656  N   GLU   217     118.555 129.890 104.735  0.00  0.00           N  
ATOM   1657  CA  GLU   217     118.199 129.036 105.869  0.00  0.00           C  
ATOM   1658  C   GLU   217     116.791 128.421 105.671  0.00  0.00           C  
ATOM   1659  O   GLU   217     116.658 127.255 106.076  0.00  0.00           O  
ATOM   1660  CB  GLU   217     118.390 129.827 107.219  0.00  0.00           C  
ATOM   1661  CG  GLU   217     118.278 128.923 108.532  0.00  0.00           C  
ATOM   1662  CD  GLU   217     116.785 128.849 108.982  0.00  0.00           C  
ATOM   1663  OE1 GLU   217     115.962 129.728 108.692  0.00  0.00           O  
ATOM   1664  OE2 GLU   217     116.464 127.848 109.697  0.00  0.00           O1-
ATOM   1665  N   ASN   218     115.865 129.141 105.025  0.00  0.00           N  
ATOM   1666  CA  ASN   218     114.444 128.746 105.011  0.00  0.00           C  
ATOM   1667  C   ASN   218     113.701 129.191 103.724  0.00  0.00           C  
ATOM   1668  O   ASN   218     114.297 129.984 102.960  0.00  0.00           O  
ATOM   1669  CB  ASN   218     113.745 129.327 106.241  0.00  0.00           C  
ATOM   1670  CG  ASN   218     113.698 130.828 106.340  0.00  0.00           C  
ATOM   1671  ND2 ASN   218     114.790 131.471 106.767  0.00  0.00           N  
ATOM   1672  OD1 ASN   218     112.715 131.494 106.025  0.00  0.00           O  
ATOM   1673  N   ASN   219     112.452 128.804 103.471  0.00  0.00           N  
ATOM   1674  CA  ASN   219     111.630 129.253 102.285  0.00  0.00           C  
ATOM   1675  C   ASN   219     111.661 130.782 102.177  0.00  0.00           C  
ATOM   1676  O   ASN   219     111.666 131.195 100.993  0.00  0.00           O  
ATOM   1677  CB  ASN   219     110.158 128.810 102.241  0.00  0.00           C  
ATOM   1678  CG  ASN   219     110.030 127.291 102.024  0.00  0.00           C  
ATOM   1679  ND2 ASN   219     108.813 126.778 101.971  0.00  0.00           N  
ATOM   1680  OD1 ASN   219     111.025 126.621 101.957  0.00  0.00           O  
ATOM   1681  N   THR   220     111.539 131.537 103.249  0.00  0.00           N  
ATOM   1682  CA  THR   220     111.500 133.034 103.133  0.00  0.00           C  
ATOM   1683  C   THR   220     112.925 133.663 102.841  0.00  0.00           C  
ATOM   1684  O   THR   220     112.925 134.756 102.234  0.00  0.00           O  
ATOM   1685  CB  THR   220     110.851 133.655 104.360  0.00  0.00           C  
ATOM   1686  CG2 THR   220     109.631 132.830 104.850  0.00  0.00           C  
ATOM   1687  OG1 THR   220     111.719 133.753 105.456  0.00  0.00           O  
ATOM   1688  N   SER   221     114.113 133.145 103.204  0.00  0.00           N  
ATOM   1689  CA  SER   221     115.448 133.607 102.856  0.00  0.00           C  
ATOM   1690  C   SER   221     115.604 133.316 101.346  0.00  0.00           C  
ATOM   1691  O   SER   221     115.946 134.238 100.591  0.00  0.00           O  
ATOM   1692  CB  SER   221     116.472 133.122 103.886  0.00  0.00           C  
ATOM   1693  OG  SER   221     116.177 131.785 104.261  0.00  0.00           O  
ATOM   1694  N   ALA   222     115.105 132.177 100.844  0.00  0.00           N  
ATOM   1695  CA  ALA   222     115.005 131.768  99.506  0.00  0.00           C  
ATOM   1696  C   ALA   222     114.049 132.677  98.675  0.00  0.00           C  
ATOM   1697  O   ALA   222     114.436 132.968  97.499  0.00  0.00           O  
ATOM   1698  CB  ALA   222     114.642 130.276  99.412  0.00  0.00           C  
ATOM   1699  N   GLY   223     113.023 133.290  99.308  0.00  0.00           N  
ATOM   1700  CA  GLY   223     112.053 134.239  98.650  0.00  0.00           C  
ATOM   1701  C   GLY   223     110.781 133.542  98.124  0.00  0.00           C  
ATOM   1702  O   GLY   223     110.039 134.161  97.379  0.00  0.00           O  
ATOM   1703  N   VAL   224     110.588 132.261  98.404  0.00  0.00           N  
ATOM   1704  CA  VAL   224     109.459 131.462  98.011  0.00  0.00           C  
ATOM   1705  C   VAL   224     108.336 131.335  99.095  0.00  0.00           C  
ATOM   1706  O   VAL   224     108.506 131.841 100.217  0.00  0.00           O  
ATOM   1707  CB  VAL   224     109.886 130.020  97.492  0.00  0.00           C  
ATOM   1708  CG1 VAL   224     109.947 130.031  95.916  0.00  0.00           C  
ATOM   1709  CG2 VAL   224     111.227 129.466  98.031  0.00  0.00           C  
ATOM   1710  N   ALA   225     107.237 130.570  98.780  0.00  0.00           N  
ATOM   1711  CA  ALA   225     106.043 130.436  99.644  0.00  0.00           C  
ATOM   1712  C   ALA   225     106.262 129.883 101.022  0.00  0.00           C  
ATOM   1713  O   ALA   225     107.064 128.966 101.164  0.00  0.00           O  
ATOM   1714  CB  ALA   225     105.099 129.653  98.832  0.00  0.00           C  
ATOM   1715  N   SER   226     105.719 130.605 102.041  0.00  0.00           N  
ATOM   1716  CA  SER   226     106.507 130.881 103.300  0.00  0.00           C  
ATOM   1717  C   SER   226     106.283 129.796 104.343  0.00  0.00           C  
ATOM   1718  O   SER   226     106.951 129.886 105.373  0.00  0.00           O  
ATOM   1719  CB  SER   226     106.225 132.207 103.970  0.00  0.00           C  
ATOM   1720  OG  SER   226     104.846 132.351 104.127  0.00  0.00           O  
ATOM   1721  N   SER   227     105.390 128.831 104.087  0.00  0.00           N  
ATOM   1722  CA  SER   227     105.165 127.677 104.923  0.00  0.00           C  
ATOM   1723  C   SER   227     105.053 126.350 104.127  0.00  0.00           C  
ATOM   1724  O   SER   227     104.840 126.330 102.927  0.00  0.00           O  
ATOM   1725  CB  SER   227     103.954 127.889 105.879  0.00  0.00           C  
ATOM   1726  OG  SER   227     102.885 126.996 105.541  0.00  0.00           O  
ATOM   1727  N   PRO   228     105.310 125.182 104.758  0.00  0.00           N  
ATOM   1728  CA  PRO   228     105.437 123.971 104.029  0.00  0.00           C  
ATOM   1729  C   PRO   228     104.059 123.431 103.562  0.00  0.00           C  
ATOM   1730  O   PRO   228     103.986 122.472 102.808  0.00  0.00           O  
ATOM   1731  CB  PRO   228     106.081 122.959 105.012  0.00  0.00           C  
ATOM   1732  CG  PRO   228     105.601 123.458 106.352  0.00  0.00           C  
ATOM   1733  CD  PRO   228     105.365 124.998 106.208  0.00  0.00           C  
ATOM   1734  N   THR   229     102.949 124.018 104.072  0.00  0.00           N  
ATOM   1735  CA  THR   229     101.551 123.737 103.662  0.00  0.00           C  
ATOM   1736  C   THR   229     101.055 124.590 102.513  0.00  0.00           C  
ATOM   1737  O   THR   229     100.015 124.286 101.925  0.00  0.00           O  
ATOM   1738  CB  THR   229     100.527 123.484 104.789  0.00  0.00           C  
ATOM   1739  CG2 THR   229     101.282 123.389 106.138  0.00  0.00           C  
ATOM   1740  OG1 THR   229      99.754 124.608 104.893  0.00  0.00           O  
ATOM   1741  N   ASP   230     101.814 125.679 102.146  0.00  0.00           N  
ATOM   1742  CA  ASP   230     101.448 126.677 101.101  0.00  0.00           C  
ATOM   1743  C   ASP   230     101.421 126.078  99.638  0.00  0.00           C  
ATOM   1744  O   ASP   230     100.664 126.508  98.813  0.00  0.00           O  
ATOM   1745  CB  ASP   230     102.138 128.006 101.298  0.00  0.00           C  
ATOM   1746  CG  ASP   230     101.607 128.808 102.525  0.00  0.00           C  
ATOM   1747  OD1 ASP   230     101.504 128.320 103.638  0.00  0.00           O  
ATOM   1748  OD2 ASP   230     101.371 129.992 102.342  0.00  0.00           O1-
ATOM   1749  N   ILE   231     102.155 125.038  99.424  0.00  0.00           N  
ATOM   1750  CA  ILE   231     102.451 124.367  98.255  0.00  0.00           C  
ATOM   1751  C   ILE   231     102.331 122.808  98.480  0.00  0.00           C  
ATOM   1752  O   ILE   231     102.996 121.960  97.855  0.00  0.00           O  
ATOM   1753  CB  ILE   231     103.831 124.845  97.719  0.00  0.00           C  
ATOM   1754  CG1 ILE   231     104.964 124.555  98.751  0.00  0.00           C  
ATOM   1755  CG2 ILE   231     103.843 126.270  97.180  0.00  0.00           C  
ATOM   1756  CD1 ILE   231     106.365 124.658  98.023  0.00  0.00           C  
ATOM   1757  N   LYS   232     101.320 122.426  99.279  0.00  0.00           N  
ATOM   1758  CA  LYS   232     101.062 120.985  99.643  0.00  0.00           C  
ATOM   1759  C   LYS   232     100.650 120.229  98.370  0.00  0.00           C  
ATOM   1760  O   LYS   232      99.872 120.726  97.547  0.00  0.00           O  
ATOM   1761  CB  LYS   232      99.859 120.900 100.715  0.00  0.00           C  
ATOM   1762  CG  LYS   232      99.845 119.603 101.571  0.00  0.00           C  
ATOM   1763  CD  LYS   232      98.862 119.796 102.724  0.00  0.00           C  
ATOM   1764  CE  LYS   232      98.909 118.587 103.574  0.00  0.00           C  
ATOM   1765  NZ  LYS   232      97.735 118.461 104.530  0.00  0.00           N1+
ATOM   1766  N   GLY   233     101.191 119.027  98.239  0.00  0.00           N  
ATOM   1767  CA  GLY   233     100.767 117.989  97.279  0.00  0.00           C  
ATOM   1768  C   GLY   233      99.483 117.265  97.637  0.00  0.00           C  
ATOM   1769  O   GLY   233      98.897 117.460  98.696  0.00  0.00           O  
ATOM   1770  N   LYS   234      99.124 116.256  96.812  0.00  0.00           N  
ATOM   1771  CA  LYS   234      98.071 115.229  96.970  0.00  0.00           C  
ATOM   1772  C   LYS   234      98.579 114.009  97.784  0.00  0.00           C  
ATOM   1773  O   LYS   234      97.781 113.333  98.393  0.00  0.00           O  
ATOM   1774  CB  LYS   234      97.611 114.880  95.581  0.00  0.00           C  
ATOM   1775  CG  LYS   234      96.633 113.702  95.575  0.00  0.00           C  
ATOM   1776  CD  LYS   234      96.337 113.089  94.164  0.00  0.00           C  
ATOM   1777  CE  LYS   234      95.076 112.296  94.005  0.00  0.00           C  
ATOM   1778  NZ  LYS   234      95.020 111.322  95.077  0.00  0.00           N1+
ATOM   1779  N   TYR   235      99.927 113.771  97.815  0.00  0.00           N  
ATOM   1780  CA  TYR   235     100.677 112.852  98.721  0.00  0.00           C  
ATOM   1781  C   TYR   235     101.814 113.606  99.517  0.00  0.00           C  
ATOM   1782  O   TYR   235     102.283 113.087 100.513  0.00  0.00           O  
ATOM   1783  CB  TYR   235     101.397 111.950  97.766  0.00  0.00           C  
ATOM   1784  CG  TYR   235     100.470 111.338  96.699  0.00  0.00           C  
ATOM   1785  CD1 TYR   235     100.593 111.722  95.349  0.00  0.00           C  
ATOM   1786  CD2 TYR   235      99.463 110.401  97.106  0.00  0.00           C  
ATOM   1787  CE1 TYR   235      99.704 111.237  94.351  0.00  0.00           C  
ATOM   1788  CE2 TYR   235      98.599 109.860  96.070  0.00  0.00           C  
ATOM   1789  CZ  TYR   235      98.709 110.289  94.686  0.00  0.00           C  
ATOM   1790  OH  TYR   235      98.006 109.698  93.681  0.00  0.00           O  
ATOM   1791  N   VAL   236     102.304 114.744  99.068  0.00  0.00           N  
ATOM   1792  CA  VAL   236     103.371 115.530  99.807  0.00  0.00           C  
ATOM   1793  C   VAL   236     102.712 116.491 100.782  0.00  0.00           C  
ATOM   1794  O   VAL   236     101.996 117.403 100.500  0.00  0.00           O  
ATOM   1795  CB  VAL   236     104.255 116.174  98.729  0.00  0.00           C  
ATOM   1796  CG1 VAL   236     105.496 116.714  99.349  0.00  0.00           C  
ATOM   1797  CG2 VAL   236     104.559 115.263  97.564  0.00  0.00           C  
ATOM   1798  N   LYS   237     103.036 116.222 102.063  0.00  0.00           N  
ATOM   1799  CA  LYS   237     102.657 116.922 103.269  0.00  0.00           C  
ATOM   1800  C   LYS   237     103.358 118.302 103.325  0.00  0.00           C  
ATOM   1801  O   LYS   237     102.711 119.380 103.682  0.00  0.00           O  
ATOM   1802  CB  LYS   237     102.892 116.034 104.514  0.00  0.00           C  
ATOM   1803  CG  LYS   237     102.378 116.670 105.872  0.00  0.00           C  
ATOM   1804  CD  LYS   237     103.144 115.950 106.952  0.00  0.00           C  
ATOM   1805  CE  LYS   237     102.815 116.179 108.421  0.00  0.00           C  
ATOM   1806  NZ  LYS   237     102.960 117.544 108.895  0.00  0.00           N1+
ATOM   1807  N   GLU   238     104.661 118.321 103.130  0.00  0.00           N  
ATOM   1808  CA  GLU   238     105.535 119.433 103.420  0.00  0.00           C  
ATOM   1809  C   GLU   238     106.628 119.663 102.419  0.00  0.00           C  
ATOM   1810  O   GLU   238     107.207 118.648 102.049  0.00  0.00           O  
ATOM   1811  CB  GLU   238     106.252 119.210 104.813  0.00  0.00           C  
ATOM   1812  CG  GLU   238     105.386 119.031 106.054  0.00  0.00           C  
ATOM   1813  CD  GLU   238     106.173 118.586 107.311  0.00  0.00           C  
ATOM   1814  OE1 GLU   238     107.409 118.233 107.146  0.00  0.00           O  
ATOM   1815  OE2 GLU   238     105.577 118.487 108.421  0.00  0.00           O1-
ATOM   1816  N   VAL   239     106.922 120.902 101.997  0.00  0.00           N  
ATOM   1817  CA  VAL   239     108.137 121.199 101.243  0.00  0.00           C  
ATOM   1818  C   VAL   239     108.886 122.480 101.791  0.00  0.00           C  
ATOM   1819  O   VAL   239     108.388 123.601 101.903  0.00  0.00           O  
ATOM   1820  CB  VAL   239     107.884 121.238  99.744  0.00  0.00           C  
ATOM   1821  CG1 VAL   239     109.145 121.565  98.894  0.00  0.00           C  
ATOM   1822  CG2 VAL   239     107.212 119.973  99.246  0.00  0.00           C  
ATOM   1823  N   GLU   240     110.150 122.312 102.177  0.00  0.00           N  
ATOM   1824  CA  GLU   240     110.801 123.338 102.981  0.00  0.00           C  
ATOM   1825  C   GLU   240     112.363 123.326 102.800  0.00  0.00           C  
ATOM   1826  O   GLU   240     112.955 122.306 102.644  0.00  0.00           O  
ATOM   1827  CB  GLU   240     110.411 123.190 104.452  0.00  0.00           C  
ATOM   1828  CG  GLU   240     111.139 124.195 105.337  0.00  0.00           C  
ATOM   1829  CD  GLU   240     110.379 124.797 106.574  0.00  0.00           C  
ATOM   1830  OE1 GLU   240     109.170 124.528 106.800  0.00  0.00           O  
ATOM   1831  OE2 GLU   240     110.923 125.613 107.352  0.00  0.00           O1-
ATOM   1832  N   VAL   241     112.954 124.514 102.822  0.00  0.00           N  
ATOM   1833  CA  VAL   241     114.376 124.776 102.662  0.00  0.00           C  
ATOM   1834  C   VAL   241     115.062 124.667 104.033  0.00  0.00           C  
ATOM   1835  O   VAL   241     114.642 125.196 105.023  0.00  0.00           O  
ATOM   1836  CB  VAL   241     114.830 126.006 101.782  0.00  0.00           C  
ATOM   1837  CG1 VAL   241     116.305 126.066 101.395  0.00  0.00           C  
ATOM   1838  CG2 VAL   241     113.963 126.245 100.569  0.00  0.00           C  
ATOM   1839  N   LYS   242     116.224 124.009 104.012  0.00  0.00           N  
ATOM   1840  CA  LYS   242     117.151 123.987 105.113  0.00  0.00           C  
ATOM   1841  C   LYS   242     118.557 124.362 104.696  0.00  0.00           C  
ATOM   1842  O   LYS   242     119.262 123.568 104.025  0.00  0.00           O  
ATOM   1843  CB  LYS   242     117.080 122.583 105.663  0.00  0.00           C  
ATOM   1844  CG  LYS   242     115.767 122.156 106.229  0.00  0.00           C  
ATOM   1845  CD  LYS   242     115.632 122.635 107.748  0.00  0.00           C  
ATOM   1846  CE  LYS   242     114.681 123.834 107.955  0.00  0.00           C  
ATOM   1847  NZ  LYS   242     115.393 125.137 107.780  0.00  0.00           N1+
ATOM   1848  N   ASN   243     118.980 125.609 104.988  0.00  0.00           N  
ATOM   1849  CA  ASN   243     120.335 126.080 104.536  0.00  0.00           C  
ATOM   1850  C   ASN   243     120.695 125.753 103.082  0.00  0.00           C  
ATOM   1851  O   ASN   243     121.844 125.402 102.823  0.00  0.00           O  
ATOM   1852  CB  ASN   243     121.401 125.598 105.547  0.00  0.00           C  
ATOM   1853  CG  ASN   243     121.149 125.973 107.024  0.00  0.00           C  
ATOM   1854  ND2 ASN   243     121.534 125.149 107.974  0.00  0.00           N  
ATOM   1855  OD1 ASN   243     120.562 127.002 107.287  0.00  0.00           O  
ATOM   1856  N   GLY   244     119.788 125.921 102.099  0.00  0.00           N  
ATOM   1857  CA  GLY   244     119.840 125.683 100.626  0.00  0.00           C  
ATOM   1858  C   GLY   244     119.635 124.168 100.270  0.00  0.00           C  
ATOM   1859  O   GLY   244     119.884 123.770  99.114  0.00  0.00           O  
ATOM   1860  N   VAL   245     119.338 123.281 101.217  0.00  0.00           N  
ATOM   1861  CA  VAL   245     118.891 121.887 100.901  0.00  0.00           C  
ATOM   1862  C   VAL   245     117.331 121.895 100.846  0.00  0.00           C  
ATOM   1863  O   VAL   245     116.664 122.387 101.737  0.00  0.00           O  
ATOM   1864  CB  VAL   245     119.436 120.811 101.847  0.00  0.00           C  
ATOM   1865  CG1 VAL   245     118.783 119.454 101.668  0.00  0.00           C  
ATOM   1866  CG2 VAL   245     120.986 120.791 101.908  0.00  0.00           C  
ATOM   1867  N   VAL   246     116.693 121.433  99.778  0.00  0.00           N  
ATOM   1868  CA  VAL   246     115.202 121.432  99.693  0.00  0.00           C  
ATOM   1869  C   VAL   246     114.756 119.982 100.141  0.00  0.00           C  
ATOM   1870  O   VAL   246     115.020 118.915  99.716  0.00  0.00           O  
ATOM   1871  CB  VAL   246     114.640 121.780  98.295  0.00  0.00           C  
ATOM   1872  CG1 VAL   246     113.129 122.095  98.287  0.00  0.00           C  
ATOM   1873  CG2 VAL   246     115.404 123.003  97.648  0.00  0.00           C  
ATOM   1874  N   THR   247     113.826 120.021 101.136  0.00  0.00           N  
ATOM   1875  CA  THR   247     113.325 118.839 101.827  0.00  0.00           C  
ATOM   1876  C   THR   247     111.816 118.623 101.596  0.00  0.00           C  
ATOM   1877  O   THR   247     111.054 119.557 101.739  0.00  0.00           O  
ATOM   1878  CB  THR   247     113.742 118.919 103.373  0.00  0.00           C  
ATOM   1879  CG2 THR   247     115.249 119.134 103.724  0.00  0.00           C  
ATOM   1880  OG1 THR   247     112.952 119.959 103.976  0.00  0.00           O  
ATOM   1881  N   ALA   248     111.395 117.351 101.412  0.00  0.00           N  
ATOM   1882  CA  ALA   248     109.980 117.050 101.350  0.00  0.00           C  
ATOM   1883  C   ALA   248     109.586 115.996 102.398  0.00  0.00           C  
ATOM   1884  O   ALA   248     110.433 115.155 102.750  0.00  0.00           O  
ATOM   1885  CB  ALA   248     109.751 116.506  99.892  0.00  0.00           C  
ATOM   1886  N   THR   249     108.387 116.173 103.029  0.00  0.00           N  
ATOM   1887  CA  THR   249     107.729 115.125 103.758  0.00  0.00           C  
ATOM   1888  C   THR   249     106.389 114.711 103.158  0.00  0.00           C  
ATOM   1889  O   THR   249     105.574 115.594 102.796  0.00  0.00           O  
ATOM   1890  CB  THR   249     107.654 115.305 105.292  0.00  0.00           C  
ATOM   1891  CG2 THR   249     107.710 113.972 106.072  0.00  0.00           C  
ATOM   1892  OG1 THR   249     108.793 115.968 105.814  0.00  0.00           O  
ATOM   1893  N   MET   250     106.149 113.390 103.156  0.00  0.00           N  
ATOM   1894  CA  MET   250     104.924 112.821 102.696  0.00  0.00           C  
ATOM   1895  C   MET   250     103.849 112.681 103.785  0.00  0.00           C  
ATOM   1896  O   MET   250     104.115 112.879 104.969  0.00  0.00           O  
ATOM   1897  CB  MET   250     105.240 111.408 102.106  0.00  0.00           C  
ATOM   1898  CG  MET   250     106.387 111.304 101.109  0.00  0.00           C  
ATOM   1899  SD  MET   250     106.384 112.392  99.667  0.00  0.00           S  
ATOM   1900  CE  MET   250     105.062 111.512  98.720  0.00  0.00           C  
ATOM   1901  N   LEU   251     102.592 112.493 103.325  0.00  0.00           N  
ATOM   1902  CA  LEU   251     101.441 112.252 104.177  0.00  0.00           C  
ATOM   1903  C   LEU   251     101.611 110.917 104.920  0.00  0.00           C  
ATOM   1904  O   LEU   251     102.013 109.957 104.361  0.00  0.00           O  
ATOM   1905  CB  LEU   251     100.132 112.308 103.366  0.00  0.00           C  
ATOM   1906  CG  LEU   251      99.764 113.729 102.874  0.00  0.00           C  
ATOM   1907  CD1 LEU   251      98.681 113.792 101.843  0.00  0.00           C  
ATOM   1908  CD2 LEU   251      99.483 114.668 104.001  0.00  0.00           C  
ATOM   1909  N   SER   252     101.171 110.859 106.198  0.00  0.00           N  
ATOM   1910  CA  SER   252     101.051 109.674 107.029  0.00  0.00           C  
ATOM   1911  C   SER   252      99.900 108.702 106.786  0.00  0.00           C  
ATOM   1912  O   SER   252      99.601 107.782 107.587  0.00  0.00           O  
ATOM   1913  CB  SER   252     101.195 110.078 108.492  0.00  0.00           C  
ATOM   1914  OG  SER   252     100.114 110.915 108.935  0.00  0.00           O  
ATOM   1915  N   SER   253      99.115 108.901 105.705  0.00  0.00           N  
ATOM   1916  CA  SER   253      98.131 107.972 105.204  0.00  0.00           C  
ATOM   1917  C   SER   253      97.918 108.150 103.675  0.00  0.00           C  
ATOM   1918  O   SER   253      98.044 109.227 103.088  0.00  0.00           O  
ATOM   1919  CB  SER   253      96.834 108.293 105.924  0.00  0.00           C  
ATOM   1920  OG  SER   253      96.082 107.131 105.989  0.00  0.00           O  
ATOM   1921  N   GLY   254      97.566 107.024 103.078  0.00  0.00           N  
ATOM   1922  CA  GLY   254      97.249 106.783 101.646  0.00  0.00           C  
ATOM   1923  C   GLY   254      98.497 106.772 100.756  0.00  0.00           C  
ATOM   1924  O   GLY   254      98.420 106.229  99.646  0.00  0.00           O  
ATOM   1925  N   VAL   255      99.663 107.249 101.214  0.00  0.00           N  
ATOM   1926  CA  VAL   255     100.915 107.149 100.524  0.00  0.00           C  
ATOM   1927  C   VAL   255     101.635 105.808 100.586  0.00  0.00           C  
ATOM   1928  O   VAL   255     102.688 105.714 101.207  0.00  0.00           O  
ATOM   1929  CB  VAL   255     101.832 108.298 100.967  0.00  0.00           C  
ATOM   1930  CG1 VAL   255     103.020 108.461 100.018  0.00  0.00           C  
ATOM   1931  CG2 VAL   255     101.128 109.686 101.193  0.00  0.00           C  
ATOM   1932  N   ASN   256     101.021 104.833  99.891  0.00  0.00           N  
ATOM   1933  CA  ASN   256     101.493 103.426  99.756  0.00  0.00           C  
ATOM   1934  C   ASN   256     101.543 102.647 101.111  0.00  0.00           C  
ATOM   1935  O   ASN   256     100.945 103.072 102.113  0.00  0.00           O  
ATOM   1936  CB  ASN   256     102.876 103.482  99.010  0.00  0.00           C  
ATOM   1937  CG  ASN   256     103.323 102.187  98.527  0.00  0.00           C  
ATOM   1938  ND2 ASN   256     102.947 101.780  97.315  0.00  0.00           N  
ATOM   1939  OD1 ASN   256     104.040 101.453  99.195  0.00  0.00           O  
ATOM   1940  N   ASN   257     102.145 101.478 101.227  0.00  0.00           N  
ATOM   1941  CA  ASN   257     102.476 100.837 102.462  0.00  0.00           C  
ATOM   1942  C   ASN   257     103.681 101.473 103.205  0.00  0.00           C  
ATOM   1943  O   ASN   257     103.639 101.857 104.380  0.00  0.00           O  
ATOM   1944  CB  ASN   257     102.579  99.405 102.295  0.00  0.00           C  
ATOM   1945  CG  ASN   257     103.056  98.551 103.452  0.00  0.00           C  
ATOM   1946  ND2 ASN   257     103.508  97.399 103.108  0.00  0.00           N  
ATOM   1947  OD1 ASN   257     103.030  98.930 104.617  0.00  0.00           O  
ATOM   1948  N   GLU   258     104.867 101.556 102.571  0.00  0.00           N  
ATOM   1949  CA  GLU   258     106.157 101.608 103.184  0.00  0.00           C  
ATOM   1950  C   GLU   258     106.792 103.034 103.352  0.00  0.00           C  
ATOM   1951  O   GLU   258     107.752 103.283 104.132  0.00  0.00           O  
ATOM   1952  CB  GLU   258     107.059 100.729 102.194  0.00  0.00           C  
ATOM   1953  CG  GLU   258     106.730  99.257 102.357  0.00  0.00           C  
ATOM   1954  CD  GLU   258     107.611  98.376 101.414  0.00  0.00           C  
ATOM   1955  OE1 GLU   258     108.656  98.801 100.986  0.00  0.00           O  
ATOM   1956  OE2 GLU   258     107.208  97.209 101.221  0.00  0.00           O1-
ATOM   1957  N   ILE   259     106.174 103.997 102.662  0.00  0.00           N  
ATOM   1958  CA  ILE   259     106.674 105.414 102.537  0.00  0.00           C  
ATOM   1959  C   ILE   259     105.686 106.469 103.115  0.00  0.00           C  
ATOM   1960  O   ILE   259     105.809 107.652 102.781  0.00  0.00           O  
ATOM   1961  CB  ILE   259     107.022 105.730 101.043  0.00  0.00           C  
ATOM   1962  CG1 ILE   259     105.855 105.658 100.142  0.00  0.00           C  
ATOM   1963  CG2 ILE   259     108.045 104.702 100.564  0.00  0.00           C  
ATOM   1964  CD1 ILE   259     106.039 106.117  98.743  0.00  0.00           C  
ATOM   1965  N   LYS   260     104.671 105.978 103.912  0.00  0.00           N  
ATOM   1966  CA  LYS   260     103.703 106.823 104.660  0.00  0.00           C  
ATOM   1967  C   LYS   260     104.555 107.590 105.672  0.00  0.00           C  
ATOM   1968  O   LYS   260     105.273 107.004 106.434  0.00  0.00           O  
ATOM   1969  CB  LYS   260     102.584 105.963 105.380  0.00  0.00           C  
ATOM   1970  CG  LYS   260     101.582 105.218 104.423  0.00  0.00           C  
ATOM   1971  CD  LYS   260     100.437 104.459 105.121  0.00  0.00           C  
ATOM   1972  CE  LYS   260     100.994 103.172 105.731  0.00  0.00           C  
ATOM   1973  NZ  LYS   260     100.917 103.193 107.170  0.00  0.00           N1+
ATOM   1974  N   GLY   261     104.483 108.902 105.677  0.00  0.00           N  
ATOM   1975  CA  GLY   261     105.075 109.783 106.652  0.00  0.00           C  
ATOM   1976  C   GLY   261     106.617 109.894 106.551  0.00  0.00           C  
ATOM   1977  O   GLY   261     107.272 110.570 107.444  0.00  0.00           O  
ATOM   1978  N   LYS   262     107.274 109.353 105.512  0.00  0.00           N  
ATOM   1979  CA  LYS   262     108.708 109.400 105.225  0.00  0.00           C  
ATOM   1980  C   LYS   262     109.134 110.705 104.428  0.00  0.00           C  
ATOM   1981  O   LYS   262     108.278 111.376 103.803  0.00  0.00           O  
ATOM   1982  CB  LYS   262     109.102 108.186 104.427  0.00  0.00           C  
ATOM   1983  CG  LYS   262     108.871 106.804 105.111  0.00  0.00           C  
ATOM   1984  CD  LYS   262     109.463 106.512 106.496  0.00  0.00           C  
ATOM   1985  CE  LYS   262     109.348 104.977 106.524  0.00  0.00           C  
ATOM   1986  NZ  LYS   262     109.904 104.518 107.867  0.00  0.00           N1+
ATOM   1987  N   LYS   263     110.409 111.048 104.393  0.00  0.00           N  
ATOM   1988  CA  LYS   263     110.968 112.205 103.772  0.00  0.00           C  
ATOM   1989  C   LYS   263     111.995 111.958 102.596  0.00  0.00           C  
ATOM   1990  O   LYS   263     112.508 110.842 102.440  0.00  0.00           O  
ATOM   1991  CB  LYS   263     111.584 113.132 104.790  0.00  0.00           C  
ATOM   1992  CG  LYS   263     112.475 112.409 105.766  0.00  0.00           C  
ATOM   1993  CD  LYS   263     113.538 113.189 106.475  0.00  0.00           C  
ATOM   1994  CE  LYS   263     114.118 112.250 107.619  0.00  0.00           C  
ATOM   1995  NZ  LYS   263     115.150 112.864 108.454  0.00  0.00           N1+
ATOM   1996  N   LEU   264     112.204 112.975 101.757  0.00  0.00           N  
ATOM   1997  CA  LEU   264     113.128 113.077 100.702  0.00  0.00           C  
ATOM   1998  C   LEU   264     113.918 114.396 100.590  0.00  0.00           C  
ATOM   1999  O   LEU   264     113.585 115.373 101.259  0.00  0.00           O  
ATOM   2000  CB  LEU   264     112.309 112.901  99.369  0.00  0.00           C  
ATOM   2001  CG  LEU   264     112.096 111.478  98.884  0.00  0.00           C  
ATOM   2002  CD1 LEU   264     111.058 111.505  97.761  0.00  0.00           C  
ATOM   2003  CD2 LEU   264     113.357 110.847  98.341  0.00  0.00           C  
ATOM   2004  N   SER   265     114.907 114.412  99.714  0.00  0.00           N  
ATOM   2005  CA  SER   265     115.577 115.752  99.493  0.00  0.00           C  
ATOM   2006  C   SER   265     116.183 115.979  98.104  0.00  0.00           C  
ATOM   2007  O   SER   265     116.431 115.048  97.329  0.00  0.00           O  
ATOM   2008  CB  SER   265     116.674 116.043 100.528  0.00  0.00           C  
ATOM   2009  OG  SER   265     117.813 115.228 100.353  0.00  0.00           O  
ATOM   2010  N   LEU   266     116.373 117.305  97.754  0.00  0.00           N  
ATOM   2011  CA  LEU   266     117.069 117.880  96.509  0.00  0.00           C  
ATOM   2012  C   LEU   266     118.112 118.963  96.970  0.00  0.00           C  
ATOM   2013  O   LEU   266     117.822 119.746  97.799  0.00  0.00           O  
ATOM   2014  CB  LEU   266     115.932 118.425  95.568  0.00  0.00           C  
ATOM   2015  CG  LEU   266     116.221 119.346  94.370  0.00  0.00           C  
ATOM   2016  CD1 LEU   266     116.501 118.629  93.097  0.00  0.00           C  
ATOM   2017  CD2 LEU   266     114.988 120.230  94.205  0.00  0.00           C  
ATOM   2018  N   TRP   267     119.338 118.893  96.506  0.00  0.00           N  
ATOM   2019  CA  TRP   267     120.489 119.617  97.092  0.00  0.00           C  
ATOM   2020  C   TRP   267     121.397 120.089  95.949  0.00  0.00           C  
ATOM   2021  O   TRP   267     121.284 119.529  94.871  0.00  0.00           O  
ATOM   2022  CB  TRP   267     121.335 118.906  98.123  0.00  0.00           C  
ATOM   2023  CG  TRP   267     121.865 117.571  97.777  0.00  0.00           C  
ATOM   2024  CD1 TRP   267     123.072 117.399  97.178  0.00  0.00           C  
ATOM   2025  CD2 TRP   267     121.248 116.289  97.761  0.00  0.00           C  
ATOM   2026  CE2 TRP   267     122.194 115.401  97.170  0.00  0.00           C  
ATOM   2027  CE3 TRP   267     119.918 115.854  97.966  0.00  0.00           C  
ATOM   2028  NE1 TRP   267     123.307 116.111  96.950  0.00  0.00           N  
ATOM   2029  CZ2 TRP   267     121.870 114.087  96.942  0.00  0.00           C  
ATOM   2030  CZ3 TRP   267     119.579 114.526  97.621  0.00  0.00           C  
ATOM   2031  CH2 TRP   267     120.523 113.673  97.066  0.00  0.00           C  
ATOM   2032  N   ALA   268     122.298 121.033  96.188  0.00  0.00           N  
ATOM   2033  CA  ALA   268     123.049 121.510  95.038  0.00  0.00           C  
ATOM   2034  C   ALA   268     124.603 121.714  95.317  0.00  0.00           C  
ATOM   2035  O   ALA   268     124.997 121.689  96.489  0.00  0.00           O  
ATOM   2036  CB  ALA   268     122.451 122.799  94.675  0.00  0.00           C  
ATOM   2037  N   ARG   269     125.361 122.075  94.264  0.00  0.00           N  
ATOM   2038  CA  ARG   269     126.834 122.300  94.247  0.00  0.00           C  
ATOM   2039  C   ARG   269     127.187 123.585  93.566  0.00  0.00           C  
ATOM   2040  O   ARG   269     126.501 123.944  92.597  0.00  0.00           O  
ATOM   2041  CB  ARG   269     127.616 121.103  93.622  0.00  0.00           C  
ATOM   2042  CG  ARG   269     127.647 119.791  94.360  0.00  0.00           C  
ATOM   2043  CD  ARG   269     128.091 119.788  95.820  0.00  0.00           C  
ATOM   2044  NE  ARG   269     127.981 118.356  96.245  0.00  0.00           N  
ATOM   2045  CZ  ARG   269     128.332 117.710  97.371  0.00  0.00           C  
ATOM   2046  NH1 ARG   269     128.908 118.306  98.371  0.00  0.00           N1+
ATOM   2047  NH2 ARG   269     128.198 116.444  97.451  0.00  0.00           N  
ATOM   2048  N   ARG   270     128.241 124.276  94.020  0.00  0.00           N  
ATOM   2049  CA  ARG   270     128.662 125.502  93.376  0.00  0.00           C  
ATOM   2050  C   ARG   270     129.050 125.227  91.909  0.00  0.00           C  
ATOM   2051  O   ARG   270     129.805 124.282  91.597  0.00  0.00           O  
ATOM   2052  CB  ARG   270     129.833 126.048  94.303  0.00  0.00           C  
ATOM   2053  CG  ARG   270     130.425 127.414  93.920  0.00  0.00           C  
ATOM   2054  CD  ARG   270     131.488 127.771  94.931  0.00  0.00           C  
ATOM   2055  NE  ARG   270     131.890 129.111  94.649  0.00  0.00           N  
ATOM   2056  CZ  ARG   270     131.453 130.302  95.069  0.00  0.00           C  
ATOM   2057  NH1 ARG   270     130.325 130.462  95.638  0.00  0.00           N1+
ATOM   2058  NH2 ARG   270     132.029 131.362  94.531  0.00  0.00           N  
ATOM   2059  N   GLU   271     128.745 126.219  91.061  0.00  0.00           N  
ATOM   2060  CA  GLU   271     129.143 126.301  89.643  0.00  0.00           C  
ATOM   2061  C   GLU   271     129.435 127.751  89.175  0.00  0.00           C  
ATOM   2062  O   GLU   271     129.361 128.096  87.968  0.00  0.00           O  
ATOM   2063  CB  GLU   271     128.326 125.448  88.667  0.00  0.00           C  
ATOM   2064  CG  GLU   271     128.547 123.888  88.596  0.00  0.00           C  
ATOM   2065  CD  GLU   271     130.014 123.590  88.103  0.00  0.00           C  
ATOM   2066  OE1 GLU   271     130.695 124.419  87.408  0.00  0.00           O  
ATOM   2067  OE2 GLU   271     130.436 122.389  88.259  0.00  0.00           O1-
ATOM   2068  N   ASN   272     129.765 128.646  90.126  0.00  0.00           N  
ATOM   2069  CA  ASN   272     130.454 129.931  89.818  0.00  0.00           C  
ATOM   2070  C   ASN   272     129.858 130.730  88.667  0.00  0.00           C  
ATOM   2071  O   ASN   272     130.567 131.328  87.879  0.00  0.00           O  
ATOM   2072  CB  ASN   272     132.001 129.698  89.670  0.00  0.00           C  
ATOM   2073  CG  ASN   272     132.528 128.974  90.975  0.00  0.00           C  
ATOM   2074  ND2 ASN   272     132.730 127.631  90.939  0.00  0.00           N  
ATOM   2075  OD1 ASN   272     132.853 129.614  91.933  0.00  0.00           O  
ATOM   2076  N   GLY   273     128.536 130.848  88.611  0.00  0.00           N  
ATOM   2077  CA  GLY   273     127.761 131.451  87.463  0.00  0.00           C  
ATOM   2078  C   GLY   273     126.550 130.551  87.063  0.00  0.00           C  
ATOM   2079  O   GLY   273     125.567 131.158  86.618  0.00  0.00           O  
ATOM   2080  N   SER   274     126.602 129.257  87.352  0.00  0.00           N  
ATOM   2081  CA  SER   274     125.459 128.333  87.460  0.00  0.00           C  
ATOM   2082  C   SER   274     125.354 127.704  88.849  0.00  0.00           C  
ATOM   2083  O   SER   274     126.135 128.125  89.713  0.00  0.00           O  
ATOM   2084  CB  SER   274     125.703 127.285  86.345  0.00  0.00           C  
ATOM   2085  OG  SER   274     124.456 126.622  86.144  0.00  0.00           O  
ATOM   2086  N   VAL   275     124.567 126.706  88.950  0.00  0.00           N  
ATOM   2087  CA  VAL   275     124.455 125.878  90.186  0.00  0.00           C  
ATOM   2088  C   VAL   275     123.901 124.468  89.787  0.00  0.00           C  
ATOM   2089  O   VAL   275     122.854 124.360  89.158  0.00  0.00           O  
ATOM   2090  CB  VAL   275     123.648 126.468  91.330  0.00  0.00           C  
ATOM   2091  CG1 VAL   275     123.915 125.727  92.626  0.00  0.00           C  
ATOM   2092  CG2 VAL   275     123.612 127.973  91.701  0.00  0.00           C  
ATOM   2093  N   LYS   276     124.643 123.405  90.232  0.00  0.00           N  
ATOM   2094  CA  LYS   276     124.441 122.047  89.881  0.00  0.00           C  
ATOM   2095  C   LYS   276     123.629 121.145  90.865  0.00  0.00           C  
ATOM   2096  O   LYS   276     124.020 121.054  92.013  0.00  0.00           O  
ATOM   2097  CB  LYS   276     125.772 121.401  89.557  0.00  0.00           C  
ATOM   2098  CG  LYS   276     125.511 120.078  88.892  0.00  0.00           C  
ATOM   2099  CD  LYS   276     126.963 119.550  88.652  0.00  0.00           C  
ATOM   2100  CE  LYS   276     126.906 118.219  87.824  0.00  0.00           C  
ATOM   2101  NZ  LYS   276     128.209 117.492  87.790  0.00  0.00           N1+
ATOM   2102  N   TRP   277     122.557 120.566  90.461  0.00  0.00           N  
ATOM   2103  CA  TRP   277     121.582 119.892  91.348  0.00  0.00           C  
ATOM   2104  C   TRP   277     121.575 118.396  91.335  0.00  0.00           C  
ATOM   2105  O   TRP   277     122.168 117.732  90.525  0.00  0.00           O  
ATOM   2106  CB  TRP   277     120.223 120.487  91.033  0.00  0.00           C  
ATOM   2107  CG  TRP   277     120.032 121.915  91.415  0.00  0.00           C  
ATOM   2108  CD1 TRP   277     120.528 122.997  90.811  0.00  0.00           C  
ATOM   2109  CD2 TRP   277     119.556 122.388  92.709  0.00  0.00           C  
ATOM   2110  CE2 TRP   277     119.712 123.812  92.786  0.00  0.00           C  
ATOM   2111  CE3 TRP   277     118.949 121.691  93.743  0.00  0.00           C  
ATOM   2112  NE1 TRP   277     120.303 124.144  91.571  0.00  0.00           N  
ATOM   2113  CZ2 TRP   277     119.176 124.517  93.852  0.00  0.00           C  
ATOM   2114  CZ3 TRP   277     118.453 122.370  94.817  0.00  0.00           C  
ATOM   2115  CH2 TRP   277     118.571 123.817  94.874  0.00  0.00           C  
ATOM   2116  N   PHE   278     120.943 117.790  92.351  0.00  0.00           N  
ATOM   2117  CA  PHE   278     120.906 116.380  92.647  0.00  0.00           C  
ATOM   2118  C   PHE   278     119.801 116.060  93.667  0.00  0.00           C  
ATOM   2119  O   PHE   278     119.532 116.863  94.536  0.00  0.00           O  
ATOM   2120  CB  PHE   278     122.172 115.891  93.300  0.00  0.00           C  
ATOM   2121  CG  PHE   278     123.331 115.880  92.404  0.00  0.00           C  
ATOM   2122  CD1 PHE   278     124.416 116.799  92.542  0.00  0.00           C  
ATOM   2123  CD2 PHE   278     123.410 114.911  91.323  0.00  0.00           C  
ATOM   2124  CE1 PHE   278     125.579 116.611  91.733  0.00  0.00           C  
ATOM   2125  CE2 PHE   278     124.592 114.776  90.610  0.00  0.00           C  
ATOM   2126  CZ  PHE   278     125.661 115.615  90.806  0.00  0.00           C  
ATOM   2127  N   CYS   279     119.181 114.848  93.556  0.00  0.00           N  
ATOM   2128  CA  CYS   279     118.035 114.407  94.437  0.00  0.00           C  
ATOM   2129  C   CYS   279     117.880 112.935  94.817  0.00  0.00           C  
ATOM   2130  O   CYS   279     118.252 112.067  93.979  0.00  0.00           O  
ATOM   2131  CB  CYS   279     116.670 114.899  93.769  0.00  0.00           C  
ATOM   2132  SG  CYS   279     116.624 114.850  91.953  0.00  0.00           S  
ATOM   2133  N   GLY   280     117.358 112.609  96.050  0.00  0.00           N  
ATOM   2134  CA  GLY   280     117.475 111.252  96.558  0.00  0.00           C  
ATOM   2135  C   GLY   280     117.297 111.222  98.088  0.00  0.00           C  
ATOM   2136  O   GLY   280     116.392 111.975  98.551  0.00  0.00           O  
ATOM   2137  N   GLN   281     117.928 110.417  98.864  0.00  0.00           N  
ATOM   2138  CA  GLN   281     117.790 110.312 100.327  0.00  0.00           C  
ATOM   2139  C   GLN   281     118.246 111.570 101.080  0.00  0.00           C  
ATOM   2140  O   GLN   281     119.067 112.361 100.575  0.00  0.00           O  
ATOM   2141  CB  GLN   281     118.541 109.022 100.778  0.00  0.00           C  
ATOM   2142  CG  GLN   281     117.679 107.735 100.474  0.00  0.00           C  
ATOM   2143  CD  GLN   281     118.209 106.454 101.095  0.00  0.00           C  
ATOM   2144  NE2 GLN   281     117.276 105.567 101.500  0.00  0.00           N  
ATOM   2145  OE1 GLN   281     119.422 106.202 101.221  0.00  0.00           O  
ATOM   2146  N   PRO   282     117.687 111.749 102.298  0.00  0.00           N  
ATOM   2147  CA  PRO   282     117.858 112.884 103.093  0.00  0.00           C  
ATOM   2148  C   PRO   282     119.275 113.261 103.367  0.00  0.00           C  
ATOM   2149  O   PRO   282     120.122 112.483 103.887  0.00  0.00           O  
ATOM   2150  CB  PRO   282     117.041 112.615 104.380  0.00  0.00           C  
ATOM   2151  CG  PRO   282     116.020 111.679 103.920  0.00  0.00           C  
ATOM   2152  CD  PRO   282     116.692 110.875 102.871  0.00  0.00           C  
ATOM   2153  N   VAL   283     119.572 114.610 103.237  0.00  0.00           N  
ATOM   2154  CA  VAL   283     120.811 115.293 103.614  0.00  0.00           C  
ATOM   2155  C   VAL   283     120.736 116.540 104.421  0.00  0.00           C  
ATOM   2156  O   VAL   283     119.705 117.224 104.405  0.00  0.00           O  
ATOM   2157  CB  VAL   283     121.725 115.512 102.323  0.00  0.00           C  
ATOM   2158  CG1 VAL   283     121.630 114.286 101.359  0.00  0.00           C  
ATOM   2159  CG2 VAL   283     121.494 116.825 101.538  0.00  0.00           C  
ATOM   2160  N   THR   284     121.790 117.075 105.014  0.00  0.00           N  
ATOM   2161  CA  THR   284     121.870 118.450 105.679  0.00  0.00           C  
ATOM   2162  C   THR   284     123.039 119.263 105.107  0.00  0.00           C  
ATOM   2163  O   THR   284     124.019 118.719 104.627  0.00  0.00           O  
ATOM   2164  CB  THR   284     121.824 118.438 107.201  0.00  0.00           C  
ATOM   2165  CG2 THR   284     121.054 117.275 107.911  0.00  0.00           C  
ATOM   2166  OG1 THR   284     123.145 118.403 107.768  0.00  0.00           O  
ATOM   2167  N   ARG   285     122.957 120.618 105.081  0.00  0.00           N  
ATOM   2168  CA  ARG   285     124.024 121.463 104.580  0.00  0.00           C  
ATOM   2169  C   ARG   285     125.259 121.307 105.524  0.00  0.00           C  
ATOM   2170  O   ARG   285     125.050 121.292 106.734  0.00  0.00           O  
ATOM   2171  CB  ARG   285     123.525 122.881 104.448  0.00  0.00           C  
ATOM   2172  CG  ARG   285     124.514 123.776 103.651  0.00  0.00           C  
ATOM   2173  CD  ARG   285     124.991 123.321 102.225  0.00  0.00           C  
ATOM   2174  NE  ARG   285     123.921 123.321 101.173  0.00  0.00           N  
ATOM   2175  CZ  ARG   285     124.139 122.945  99.896  0.00  0.00           C  
ATOM   2176  NH1 ARG   285     125.280 122.537  99.454  0.00  0.00           N1+
ATOM   2177  NH2 ARG   285     123.242 122.974  98.942  0.00  0.00           N  
ATOM   2178  N   THR   286     126.460 121.435 104.976  0.00  0.00           N  
ATOM   2179  CA  THR   286     127.733 121.289 105.731  0.00  0.00           C  
ATOM   2180  C   THR   286     128.708 122.405 105.515  0.00  0.00           C  
ATOM   2181  O   THR   286     129.181 123.002 106.497  0.00  0.00           O  
ATOM   2182  CB  THR   286     128.386 119.878 105.603  0.00  0.00           C  
ATOM   2183  CG2 THR   286     129.424 119.698 106.683  0.00  0.00           C  
ATOM   2184  OG1 THR   286     127.461 118.846 105.612  0.00  0.00           O  
ATOM   2185  N   ASP   287     128.901 122.854 104.253  0.00  0.00           N  
ATOM   2186  CA  ASP   287     129.473 124.208 103.952  0.00  0.00           C  
ATOM   2187  C   ASP   287     129.047 124.682 102.622  0.00  0.00           C  
ATOM   2188  O   ASP   287     128.105 124.206 102.041  0.00  0.00           O  
ATOM   2189  CB  ASP   287     130.976 124.102 104.083  0.00  0.00           C  
ATOM   2190  CG  ASP   287     131.788 123.181 103.171  0.00  0.00           C  
ATOM   2191  OD1 ASP   287     131.596 123.182 101.957  0.00  0.00           O  
ATOM   2192  OD2 ASP   287     132.543 122.371 103.771  0.00  0.00           O1-
ATOM   2193  N   ASP   288     129.773 125.613 102.084  0.00  0.00           N  
ATOM   2194  CA  ASP   288     129.567 126.264 100.770  0.00  0.00           C  
ATOM   2195  C   ASP   288     129.331 125.378  99.563  0.00  0.00           C  
ATOM   2196  O   ASP   288     128.582 125.844  98.652  0.00  0.00           O  
ATOM   2197  CB  ASP   288     130.523 127.434 100.487  0.00  0.00           C  
ATOM   2198  CG  ASP   288     130.508 128.678 101.424  0.00  0.00           C  
ATOM   2199  OD1 ASP   288     130.131 128.585 102.616  0.00  0.00           O  
ATOM   2200  OD2 ASP   288     131.043 129.755 101.043  0.00  0.00           O1-
ATOM   2201  N   ASP   289     129.780 124.116  99.596  0.00  0.00           N  
ATOM   2202  CA  ASP   289     129.512 122.986  98.698  0.00  0.00           C  
ATOM   2203  C   ASP   289     128.959 121.730  99.444  0.00  0.00           C  
ATOM   2204  O   ASP   289     128.032 121.165  98.938  0.00  0.00           O  
ATOM   2205  CB  ASP   289     130.815 122.655  97.870  0.00  0.00           C  
ATOM   2206  CG  ASP   289     130.957 123.405  96.564  0.00  0.00           C  
ATOM   2207  OD1 ASP   289     130.164 123.152  95.601  0.00  0.00           O  
ATOM   2208  OD2 ASP   289     132.033 124.032  96.450  0.00  0.00           O1-
ATOM   2209  N   THR   290     129.521 121.304 100.605  0.00  0.00           N  
ATOM   2210  CA  THR   290     129.391 120.006 101.345  0.00  0.00           C  
ATOM   2211  C   THR   290     128.001 119.741 101.795  0.00  0.00           C  
ATOM   2212  O   THR   290     127.339 120.624 102.277  0.00  0.00           O  
ATOM   2213  CB  THR   290     130.526 119.918 102.451  0.00  0.00           C  
ATOM   2214  CG2 THR   290     130.683 118.551 103.041  0.00  0.00           C  
ATOM   2215  OG1 THR   290     131.747 120.363 101.923  0.00  0.00           O  
ATOM   2216  N   VAL   291     127.524 118.498 101.674  0.00  0.00           N  
ATOM   2217  CA  VAL   291     126.386 117.929 102.309  0.00  0.00           C  
ATOM   2218  C   VAL   291     126.815 116.671 103.057  0.00  0.00           C  
ATOM   2219  O   VAL   291     127.878 116.070 102.688  0.00  0.00           O  
ATOM   2220  CB  VAL   291     125.225 117.792 101.336  0.00  0.00           C  
ATOM   2221  CG1 VAL   291     124.686 119.167 100.918  0.00  0.00           C  
ATOM   2222  CG2 VAL   291     125.499 116.978 100.132  0.00  0.00           C  
ATOM   2223  N   ALA   292     126.004 116.083 103.941  0.00  0.00           N  
ATOM   2224  CA  ALA   292     126.242 114.998 104.874  0.00  0.00           C  
ATOM   2225  C   ALA   292     124.906 114.365 105.264  0.00  0.00           C  
ATOM   2226  O   ALA   292     123.838 114.966 105.081  0.00  0.00           O  
ATOM   2227  CB  ALA   292     127.051 115.529 106.099  0.00  0.00           C  
ATOM   2228  N   ASP   293     124.999 113.116 105.751  0.00  0.00           N  
ATOM   2229  CA  ASP   293     123.838 112.299 106.109  0.00  0.00           C  
ATOM   2230  C   ASP   293     122.692 112.902 106.932  0.00  0.00           C  
ATOM   2231  O   ASP   293     122.889 113.692 107.817  0.00  0.00           O  
ATOM   2232  CB  ASP   293     124.408 111.040 106.787  0.00  0.00           C  
ATOM   2233  CG  ASP   293     123.433 109.990 107.358  0.00  0.00           C  
ATOM   2234  OD1 ASP   293     122.366 109.776 106.793  0.00  0.00           O  
ATOM   2235  OD2 ASP   293     123.751 109.338 108.322  0.00  0.00           O1-
ATOM   2236  N   ALA   294     121.477 112.356 106.813  0.00  0.00           N  
ATOM   2237  CA  ALA   294     120.365 112.666 107.669  0.00  0.00           C  
ATOM   2238  C   ALA   294     119.384 111.523 107.916  0.00  0.00           C  
ATOM   2239  O   ALA   294     118.246 111.808 108.256  0.00  0.00           O  
ATOM   2240  CB  ALA   294     119.626 113.908 107.117  0.00  0.00           C  
ATOM   2241  N   LYS   295     119.816 110.240 107.671  0.00  0.00           N  
ATOM   2242  CA  LYS   295     118.990 108.971 107.896  0.00  0.00           C  
ATOM   2243  C   LYS   295     118.643 108.802 109.373  0.00  0.00           C  
ATOM   2244  O   LYS   295     119.480 109.046 110.252  0.00  0.00           O  
ATOM   2245  CB  LYS   295     119.977 107.927 107.409  0.00  0.00           C  
ATOM   2246  CG  LYS   295     119.353 106.530 107.309  0.00  0.00           C  
ATOM   2247  CD  LYS   295     120.297 105.352 107.058  0.00  0.00           C  
ATOM   2248  CE  LYS   295     119.533 104.031 107.021  0.00  0.00           C  
ATOM   2249  NZ  LYS   295     118.551 103.872 105.963  0.00  0.00           N1+
ATOM   2250  N   ASP   296     117.427 108.274 109.691  0.00  0.00           N  
ATOM   2251  CA  ASP   296     116.944 108.112 111.124  0.00  0.00           C  
ATOM   2252  C   ASP   296     115.738 107.223 111.085  0.00  0.00           C  
ATOM   2253  O   ASP   296     115.132 106.989 112.131  0.00  0.00           O  
ATOM   2254  CB  ASP   296     116.561 109.553 111.648  0.00  0.00           C  
ATOM   2255  CG  ASP   296     115.580 110.384 110.803  0.00  0.00           C  
ATOM   2256  OD1 ASP   296     114.939 109.744 109.928  0.00  0.00           O  
ATOM   2257  OD2 ASP   296     115.539 111.636 110.956  0.00  0.00           O1-
ATOM   2258  N   GLY   297     115.404 106.631 109.949  0.00  0.00           N  
ATOM   2259  CA  GLY   297     114.290 105.642 109.689  0.00  0.00           C  
ATOM   2260  C   GLY   297     113.072 106.353 109.257  0.00  0.00           C  
ATOM   2261  O   GLY   297     112.059 105.728 108.952  0.00  0.00           O  
ATOM   2262  N   LYS   298     113.129 107.697 109.169  0.00  0.00           N  
ATOM   2263  CA  LYS   298     112.099 108.501 108.556  0.00  0.00           C  
ATOM   2264  C   LYS   298     112.374 108.862 107.054  0.00  0.00           C  
ATOM   2265  O   LYS   298     111.533 109.524 106.394  0.00  0.00           O  
ATOM   2266  CB  LYS   298     111.828 109.751 109.408  0.00  0.00           C  
ATOM   2267  CG  LYS   298     111.304 109.425 110.800  0.00  0.00           C  
ATOM   2268  CD  LYS   298     110.651 110.491 111.613  0.00  0.00           C  
ATOM   2269  CE  LYS   298     110.215 109.849 112.878  0.00  0.00           C  
ATOM   2270  NZ  LYS   298     109.894 110.941 113.869  0.00  0.00           N1+
ATOM   2271  N   GLU   299     113.495 108.452 106.514  0.00  0.00           N  
ATOM   2272  CA  GLU   299     113.762 108.384 105.053  0.00  0.00           C  
ATOM   2273  C   GLU   299     112.853 107.342 104.314  0.00  0.00           C  
ATOM   2274  O   GLU   299     112.550 106.278 104.812  0.00  0.00           O  
ATOM   2275  CB  GLU   299     115.221 108.137 104.753  0.00  0.00           C  
ATOM   2276  CG  GLU   299     115.959 106.778 104.914  0.00  0.00           C  
ATOM   2277  CD  GLU   299     115.934 106.209 106.373  0.00  0.00           C  
ATOM   2278  OE1 GLU   299     115.846 107.021 107.331  0.00  0.00           O  
ATOM   2279  OE2 GLU   299     116.142 105.022 106.519  0.00  0.00           O1-
ATOM   2280  N   ILE   300     112.650 107.558 102.961  0.00  0.00           N  
ATOM   2281  CA  ILE   300     112.279 106.538 102.041  0.00  0.00           C  
ATOM   2282  C   ILE   300     113.508 105.680 101.789  0.00  0.00           C  
ATOM   2283  O   ILE   300     114.487 106.269 101.493  0.00  0.00           O  
ATOM   2284  CB  ILE   300     111.695 107.113 100.691  0.00  0.00           C  
ATOM   2285  CG1 ILE   300     110.507 108.093 100.972  0.00  0.00           C  
ATOM   2286  CG2 ILE   300     111.330 105.901  99.787  0.00  0.00           C  
ATOM   2287  CD1 ILE   300     109.767 108.530  99.683  0.00  0.00           C  
ATOM   2288  N   ASP   301     113.270 104.405 101.832  0.00  0.00           N  
ATOM   2289  CA  ASP   301     114.215 103.387 101.329  0.00  0.00           C  
ATOM   2290  C   ASP   301     114.159 103.250  99.800  0.00  0.00           C  
ATOM   2291  O   ASP   301     113.064 103.280  99.177  0.00  0.00           O  
ATOM   2292  CB  ASP   301     113.829 102.069 102.072  0.00  0.00           C  
ATOM   2293  CG  ASP   301     114.830 100.982 101.672  0.00  0.00           C  
ATOM   2294  OD1 ASP   301     114.345  99.913 101.261  0.00  0.00           O  
ATOM   2295  OD2 ASP   301     116.051 101.214 101.702  0.00  0.00           O1-
ATOM   2296  N   THR   302     115.322 103.157  99.236  0.00  0.00           N  
ATOM   2297  CA  THR   302     115.624 103.345  97.869  0.00  0.00           C  
ATOM   2298  C   THR   302     114.787 102.589  96.813  0.00  0.00           C  
ATOM   2299  O   THR   302     114.618 103.060  95.688  0.00  0.00           O  
ATOM   2300  CB  THR   302     117.147 103.048  97.558  0.00  0.00           C  
ATOM   2301  CG2 THR   302     118.106 103.494  98.702  0.00  0.00           C  
ATOM   2302  OG1 THR   302     117.401 101.672  97.454  0.00  0.00           O  
ATOM   2303  N   LYS   303     114.093 101.494  97.192  0.00  0.00           N  
ATOM   2304  CA  LYS   303     113.265 100.775  96.145  0.00  0.00           C  
ATOM   2305  C   LYS   303     112.153 101.565  95.528  0.00  0.00           C  
ATOM   2306  O   LYS   303     111.792 101.323  94.383  0.00  0.00           O  
ATOM   2307  CB  LYS   303     112.747  99.440  96.736  0.00  0.00           C  
ATOM   2308  CG  LYS   303     111.592  99.520  97.743  0.00  0.00           C  
ATOM   2309  CD  LYS   303     111.018  98.163  98.215  0.00  0.00           C  
ATOM   2310  CE  LYS   303     110.245  97.446  97.131  0.00  0.00           C  
ATOM   2311  NZ  LYS   303     109.568  96.220  97.698  0.00  0.00           N1+
ATOM   2312  N   HIE   304     111.581 102.539  96.255  0.00  0.00           N  
ATOM   2313  CA  HIE   304     110.349 103.245  95.758  0.00  0.00           C  
ATOM   2314  C   HIE   304     110.659 104.441  94.793  0.00  0.00           C  
ATOM   2315  O   HIE   304     109.736 105.025  94.303  0.00  0.00           O  
ATOM   2316  CB  HIE   304     109.521 103.687  97.002  0.00  0.00           C  
ATOM   2317  CG  HIE   304     108.937 102.634  97.793  0.00  0.00           C  
ATOM   2318  CD2 HIE   304     109.567 102.016  98.836  0.00  0.00           C  
ATOM   2319  ND1 HIE   304     107.664 102.087  97.609  0.00  0.00           N  
ATOM   2320  CE1 HIE   304     107.562 101.157  98.538  0.00  0.00           C  
ATOM   2321  NE2 HIE   304     108.658 101.091  99.323  0.00  0.00           N  
ATOM   2322  N   LEU   305     111.939 104.647  94.441  0.00  0.00           N  
ATOM   2323  CA  LEU   305     112.386 105.863  93.802  0.00  0.00           C  
ATOM   2324  C   LEU   305     112.674 105.540  92.363  0.00  0.00           C  
ATOM   2325  O   LEU   305     113.119 104.419  92.094  0.00  0.00           O  
ATOM   2326  CB  LEU   305     113.599 106.361  94.543  0.00  0.00           C  
ATOM   2327  CG  LEU   305     113.424 106.639  96.100  0.00  0.00           C  
ATOM   2328  CD1 LEU   305     114.700 107.255  96.738  0.00  0.00           C  
ATOM   2329  CD2 LEU   305     112.255 107.542  96.466  0.00  0.00           C  
ATOM   2330  N   PRO   306     112.603 106.543  91.480  0.00  0.00           N  
ATOM   2331  CA  PRO   306     113.080 106.317  90.093  0.00  0.00           C  
ATOM   2332  C   PRO   306     114.554 106.125  90.073  0.00  0.00           C  
ATOM   2333  O   PRO   306     115.274 106.678  90.914  0.00  0.00           O  
ATOM   2334  CB  PRO   306     112.815 107.693  89.394  0.00  0.00           C  
ATOM   2335  CG  PRO   306     111.436 107.997  89.984  0.00  0.00           C  
ATOM   2336  CD  PRO   306     111.779 107.717  91.486  0.00  0.00           C  
ATOM   2337  N   SER   307     115.133 105.569  88.951  0.00  0.00           N  
ATOM   2338  CA  SER   307     116.597 105.521  88.716  0.00  0.00           C  
ATOM   2339  C   SER   307     117.209 106.935  88.462  0.00  0.00           C  
ATOM   2340  O   SER   307     118.426 107.030  88.131  0.00  0.00           O  
ATOM   2341  CB  SER   307     116.836 104.604  87.534  0.00  0.00           C  
ATOM   2342  OG  SER   307     116.421 105.269  86.416  0.00  0.00           O  
ATOM   2343  N   THR   308     116.460 108.016  88.750  0.00  0.00           N  
ATOM   2344  CA  THR   308     116.902 109.409  88.657  0.00  0.00           C  
ATOM   2345  C   THR   308     116.769 110.201  89.984  0.00  0.00           C  
ATOM   2346  O   THR   308     117.161 111.369  90.018  0.00  0.00           O  
ATOM   2347  CB  THR   308     116.282 110.137  87.462  0.00  0.00           C  
ATOM   2348  CG2 THR   308     115.996 109.224  86.214  0.00  0.00           C  
ATOM   2349  OG1 THR   308     115.033 110.592  87.842  0.00  0.00           O  
ATOM   2350  N   CYS   309     116.290 109.475  91.019  0.00  0.00           N  
ATOM   2351  CA  CYS   309     116.183 109.972  92.382  0.00  0.00           C  
ATOM   2352  C   CYS   309     116.799 109.035  93.445  0.00  0.00           C  
ATOM   2353  O   CYS   309     116.117 108.730  94.386  0.00  0.00           O  
ATOM   2354  CB  CYS   309     114.656 110.144  92.656  0.00  0.00           C  
ATOM   2355  SG  CYS   309     113.806 111.359  91.561  0.00  0.00           S  
ATOM   2356  N   ARG   310     118.021 108.489  93.207  0.00  0.00           N  
ATOM   2357  CA  ARG   310     118.721 107.573  94.112  0.00  0.00           C  
ATOM   2358  C   ARG   310     120.207 107.990  94.379  0.00  0.00           C  
ATOM   2359  O   ARG   310     121.176 107.232  94.507  0.00  0.00           O  
ATOM   2360  CB  ARG   310     118.578 106.080  93.697  0.00  0.00           C  
ATOM   2361  CG  ARG   310     117.166 105.414  93.589  0.00  0.00           C  
ATOM   2362  CD  ARG   310     117.161 104.324  92.541  0.00  0.00           C  
ATOM   2363  NE  ARG   310     115.782 103.655  92.530  0.00  0.00           N  
ATOM   2364  CZ  ARG   310     115.559 102.388  92.709  0.00  0.00           C  
ATOM   2365  NH1 ARG   310     116.460 101.444  92.821  0.00  0.00           N1+
ATOM   2366  NH2 ARG   310     114.340 101.986  92.596  0.00  0.00           N  
ATOM   2367  N   ASP   311     120.456 109.299  94.471  0.00  0.00           N  
ATOM   2368  CA  ASP   311     121.683 110.062  94.826  0.00  0.00           C  
ATOM   2369  C   ASP   311     121.858 110.176  96.332  0.00  0.00           C  
ATOM   2370  O   ASP   311     120.923 109.851  97.107  0.00  0.00           O  
ATOM   2371  CB  ASP   311     121.513 111.501  94.310  0.00  0.00           C  
ATOM   2372  CG  ASP   311     121.529 111.583  92.786  0.00  0.00           C  
ATOM   2373  OD1 ASP   311     121.963 110.593  92.132  0.00  0.00           O  
ATOM   2374  OD2 ASP   311     121.101 112.531  92.127  0.00  0.00           O1-
ATOM   2375  N   ASN   312     123.015 110.594  96.859  0.00  0.00           N  
ATOM   2376  CA  ASN   312     123.200 110.983  98.261  0.00  0.00           C  
ATOM   2377  C   ASN   312     124.356 112.016  98.394  0.00  0.00           C  
ATOM   2378  O   ASN   312     124.725 112.644  97.374  0.00  0.00           O  
ATOM   2379  CB  ASN   312     123.413 109.734  99.187  0.00  0.00           C  
ATOM   2380  CG  ASN   312     124.782 109.082  99.043  0.00  0.00           C  
ATOM   2381  ND2 ASN   312     124.900 107.892  99.542  0.00  0.00           N  
ATOM   2382  OD1 ASN   312     125.762 109.643  98.522  0.00  0.00           O  
ATOM   2383  N   PHE   313     124.725 112.353  99.660  0.00  0.00           N  
ATOM   2384  CA  PHE   313     125.904 113.169  99.850  0.00  0.00           C  
ATOM   2385  C   PHE   313     127.211 113.038  99.100  0.00  0.00           C  
ATOM   2386  O   PHE   313     127.895 114.026  98.847  0.00  0.00           O  
ATOM   2387  CB  PHE   313     126.199 113.273 101.384  0.00  0.00           C  
ATOM   2388  CG  PHE   313     126.104 111.927 102.028  0.00  0.00           C  
ATOM   2389  CD1 PHE   313     127.183 111.002 102.039  0.00  0.00           C  
ATOM   2390  CD2 PHE   313     124.832 111.467 102.533  0.00  0.00           C  
ATOM   2391  CE1 PHE   313     126.955 109.727 102.616  0.00  0.00           C  
ATOM   2392  CE2 PHE   313     124.694 110.172 103.115  0.00  0.00           C  
ATOM   2393  CZ  PHE   313     125.765 109.280 103.144  0.00  0.00           C  
ATOM   2394  N   ASP   314     127.557 111.916  98.560  0.00  0.00           N  
ATOM   2395  CA  ASP   314     128.685 111.740  97.591  0.00  0.00           C  
ATOM   2396  C   ASP   314     128.491 112.304  96.214  0.00  0.00           C  
ATOM   2397  O   ASP   314     129.496 112.430  95.494  0.00  0.00           O  
ATOM   2398  CB  ASP   314     128.994 110.235  97.708  0.00  0.00           C  
ATOM   2399  CG  ASP   314     129.332 109.875  99.177  0.00  0.00           C  
ATOM   2400  OD1 ASP   314     129.842 110.725  99.990  0.00  0.00           O  
ATOM   2401  OD2 ASP   314     129.188 108.659  99.449  0.00  0.00           O1-
ATOM   2402  N   ALA   315     127.337 112.796  95.867  0.00  0.00           N  
ATOM   2403  CA  ALA   315     127.111 113.263  94.477  0.00  0.00           C  
ATOM   2404  C   ALA   315     127.739 114.646  94.085  0.00  0.00           C  
ATOM   2405  O   ALA   315     127.347 115.649  94.704  0.00  0.00           O  
ATOM   2406  CB  ALA   315     125.675 113.118  94.159  0.00  0.00           C  
ATOM   2407  N   LYS   316     128.665 114.729  93.088  0.00  0.00           N  
ATOM   2408  CA  LYS   316     129.105 116.008  92.480  0.00  0.00           C  
ATOM   2409  C   LYS   316     129.294 116.008  90.937  0.00  0.00           C  
ATOM   2410  O   LYS   316     129.876 115.008  90.514  0.00  0.00           O  
ATOM   2411  CB  LYS   316     130.342 116.374  93.298  0.00  0.00           C  
ATOM   2412  CG  LYS   316     130.937 117.634  92.686  0.00  0.00           C  
ATOM   2413  CD  LYS   316     131.930 118.346  93.534  0.00  0.00           C  
ATOM   2414  CE  LYS   316     132.316 119.613  92.872  0.00  0.00           C  
ATOM   2415  NZ  LYS   316     132.825 119.487  91.387  0.00  0.00           N1+
ATOM   2416  OXT LYS   316     128.782 116.898  90.266  0.00  0.00           O1-
ATOM   2417  N   PHE   317      63.463  64.752  88.983  0.00  0.00           N  
ATOM   2418  CA  PHE   317      63.500  64.022  87.675  0.00  0.00           C  
ATOM   2419  C   PHE   317      64.804  64.141  86.983  0.00  0.00           C  
ATOM   2420  O   PHE   317      64.898  64.807  85.942  0.00  0.00           O  
ATOM   2421  CB  PHE   317      62.285  64.344  86.771  0.00  0.00           C  
ATOM   2422  CG  PHE   317      60.991  63.775  87.243  0.00  0.00           C  
ATOM   2423  CD1 PHE   317      60.073  64.581  87.921  0.00  0.00           C  
ATOM   2424  CD2 PHE   317      60.838  62.386  87.161  0.00  0.00           C  
ATOM   2425  CE1 PHE   317      58.807  64.086  88.342  0.00  0.00           C  
ATOM   2426  CE2 PHE   317      59.657  61.840  87.719  0.00  0.00           C  
ATOM   2427  CZ  PHE   317      58.630  62.681  88.247  0.00  0.00           C  
ATOM   2428  N   THR   318      65.758  63.359  87.477  0.00  0.00           N  
ATOM   2429  CA  THR   318      67.099  63.043  86.847  0.00  0.00           C  
ATOM   2430  C   THR   318      68.112  64.186  86.407  0.00  0.00           C  
ATOM   2431  O   THR   318      69.202  64.401  86.910  0.00  0.00           O  
ATOM   2432  CB  THR   318      67.015  61.866  85.863  0.00  0.00           C  
ATOM   2433  CG2 THR   318      65.844  60.962  86.040  0.00  0.00           C  
ATOM   2434  OG1 THR   318      67.134  62.317  84.546  0.00  0.00           O  
ATOM   2435  N   LEU   319      67.633  64.981  85.433  0.00  0.00           N  
ATOM   2436  CA  LEU   319      68.253  66.126  84.802  0.00  0.00           C  
ATOM   2437  C   LEU   319      67.894  67.373  85.595  0.00  0.00           C  
ATOM   2438  O   LEU   319      66.737  67.683  85.732  0.00  0.00           O  
ATOM   2439  CB  LEU   319      67.767  66.253  83.365  0.00  0.00           C  
ATOM   2440  CG  LEU   319      68.183  67.536  82.651  0.00  0.00           C  
ATOM   2441  CD1 LEU   319      69.703  67.451  82.269  0.00  0.00           C  
ATOM   2442  CD2 LEU   319      67.399  67.699  81.318  0.00  0.00           C  
ATOM   2443  N   ILE   320      68.869  68.029  86.279  0.00  0.00           N  
ATOM   2444  CA  ILE   320      68.713  69.407  86.848  0.00  0.00           C  
ATOM   2445  C   ILE   320      69.888  70.293  86.647  0.00  0.00           C  
ATOM   2446  O   ILE   320      69.796  71.540  86.863  0.00  0.00           O  
ATOM   2447  CB  ILE   320      68.324  69.299  88.410  0.00  0.00           C  
ATOM   2448  CG1 ILE   320      69.078  68.201  89.158  0.00  0.00           C  
ATOM   2449  CG2 ILE   320      66.763  69.340  88.485  0.00  0.00           C  
ATOM   2450  CD1 ILE   320      68.830  68.020  90.689  0.00  0.00           C  
ATOM   2451  N   GLU   321      71.021  69.717  86.408  0.00  0.00           N  
ATOM   2452  CA  GLU   321      72.281  70.405  86.424  0.00  0.00           C  
ATOM   2453  C   GLU   321      72.406  71.616  85.450  0.00  0.00           C  
ATOM   2454  O   GLU   321      73.073  72.659  85.734  0.00  0.00           O  
ATOM   2455  CB  GLU   321      73.417  69.350  86.249  0.00  0.00           C  
ATOM   2456  CG  GLU   321      73.263  68.290  85.159  0.00  0.00           C  
ATOM   2457  CD  GLU   321      72.402  67.057  85.405  0.00  0.00           C  
ATOM   2458  OE1 GLU   321      71.483  67.115  86.215  0.00  0.00           O  
ATOM   2459  OE2 GLU   321      72.720  66.045  84.759  0.00  0.00           O1-
ATOM   2460  N   LEU   322      71.798  71.383  84.342  0.00  0.00           N  
ATOM   2461  CA  LEU   322      71.550  72.451  83.339  0.00  0.00           C  
ATOM   2462  C   LEU   322      70.826  73.635  84.024  0.00  0.00           C  
ATOM   2463  O   LEU   322      71.249  74.797  83.789  0.00  0.00           O  
ATOM   2464  CB  LEU   322      70.843  71.801  82.076  0.00  0.00           C  
ATOM   2465  CG  LEU   322      70.520  72.809  81.024  0.00  0.00           C  
ATOM   2466  CD1 LEU   322      71.794  73.398  80.456  0.00  0.00           C  
ATOM   2467  CD2 LEU   322      69.783  72.176  79.824  0.00  0.00           C  
ATOM   2468  N   MET   323      69.749  73.405  84.773  0.00  0.00           N  
ATOM   2469  CA  MET   323      68.887  74.474  85.299  0.00  0.00           C  
ATOM   2470  C   MET   323      69.695  75.402  86.220  0.00  0.00           C  
ATOM   2471  O   MET   323      69.434  76.647  86.296  0.00  0.00           O  
ATOM   2472  CB  MET   323      67.513  73.948  85.929  0.00  0.00           C  
ATOM   2473  CG  MET   323      66.737  73.001  84.994  0.00  0.00           C  
ATOM   2474  SD  MET   323      66.141  73.848  83.415  0.00  0.00           S  
ATOM   2475  CE  MET   323      64.585  74.541  83.925  0.00  0.00           C  
ATOM   2476  N   ILE   324      70.586  74.737  86.933  0.00  0.00           N  
ATOM   2477  CA  ILE   324      71.446  75.380  87.951  0.00  0.00           C  
ATOM   2478  C   ILE   324      72.522  76.259  87.270  0.00  0.00           C  
ATOM   2479  O   ILE   324      72.717  77.391  87.745  0.00  0.00           O  
ATOM   2480  CB  ILE   324      72.102  74.380  88.800  0.00  0.00           C  
ATOM   2481  CG1 ILE   324      70.990  73.598  89.593  0.00  0.00           C  
ATOM   2482  CG2 ILE   324      73.094  75.016  89.788  0.00  0.00           C  
ATOM   2483  CD1 ILE   324      71.509  72.557  90.599  0.00  0.00           C  
ATOM   2484  N   VAL   325      73.145  75.819  86.155  0.00  0.00           N  
ATOM   2485  CA  VAL   325      73.942  76.731  85.244  0.00  0.00           C  
ATOM   2486  C   VAL   325      73.125  77.889  84.831  0.00  0.00           C  
ATOM   2487  O   VAL   325      73.546  78.981  85.065  0.00  0.00           O  
ATOM   2488  CB  VAL   325      74.511  75.957  84.006  0.00  0.00           C  
ATOM   2489  CG1 VAL   325      75.140  76.820  82.910  0.00  0.00           C  
ATOM   2490  CG2 VAL   325      75.477  74.832  84.315  0.00  0.00           C  
ATOM   2491  N   ILE   326      71.979  77.632  84.217  0.00  0.00           N  
ATOM   2492  CA  ILE   326      71.013  78.645  83.657  0.00  0.00           C  
ATOM   2493  C   ILE   326      70.817  79.743  84.764  0.00  0.00           C  
ATOM   2494  O   ILE   326      70.957  80.954  84.545  0.00  0.00           O  
ATOM   2495  CB  ILE   326      69.654  77.975  83.133  0.00  0.00           C  
ATOM   2496  CG1 ILE   326      69.852  77.394  81.754  0.00  0.00           C  
ATOM   2497  CG2 ILE   326      68.417  78.906  83.238  0.00  0.00           C  
ATOM   2498  CD1 ILE   326      68.847  76.295  81.268  0.00  0.00           C  
ATOM   2499  N   ALA   327      70.506  79.274  85.995  0.00  0.00           N  
ATOM   2500  CA  ALA   327      70.180  80.141  87.150  0.00  0.00           C  
ATOM   2501  C   ALA   327      71.413  80.856  87.665  0.00  0.00           C  
ATOM   2502  O   ALA   327      71.340  82.088  87.747  0.00  0.00           O  
ATOM   2503  CB  ALA   327      69.606  79.384  88.360  0.00  0.00           C  
ATOM   2504  N   ILE   328      72.628  80.301  87.691  0.00  0.00           N  
ATOM   2505  CA  ILE   328      73.812  81.049  88.140  0.00  0.00           C  
ATOM   2506  C   ILE   328      74.290  82.098  87.088  0.00  0.00           C  
ATOM   2507  O   ILE   328      74.555  83.246  87.472  0.00  0.00           O  
ATOM   2508  CB  ILE   328      74.962  80.100  88.599  0.00  0.00           C  
ATOM   2509  CG1 ILE   328      74.909  79.588  90.072  0.00  0.00           C  
ATOM   2510  CG2 ILE   328      76.336  80.512  88.042  0.00  0.00           C  
ATOM   2511  CD1 ILE   328      75.082  80.592  91.186  0.00  0.00           C  
ATOM   2512  N   VAL   329      74.157  81.746  85.761  0.00  0.00           N  
ATOM   2513  CA  VAL   329      74.502  82.628  84.554  0.00  0.00           C  
ATOM   2514  C   VAL   329      73.527  83.912  84.461  0.00  0.00           C  
ATOM   2515  O   VAL   329      74.008  84.993  84.075  0.00  0.00           O  
ATOM   2516  CB  VAL   329      74.638  81.815  83.238  0.00  0.00           C  
ATOM   2517  CG1 VAL   329      75.066  82.683  81.948  0.00  0.00           C  
ATOM   2518  CG2 VAL   329      75.593  80.639  83.261  0.00  0.00           C  
ATOM   2519  N   GLY   330      72.300  83.787  84.914  0.00  0.00           N  
ATOM   2520  CA  GLY   330      71.318  84.849  85.204  0.00  0.00           C  
ATOM   2521  C   GLY   330      71.709  85.724  86.390  0.00  0.00           C  
ATOM   2522  O   GLY   330      71.587  86.975  86.332  0.00  0.00           O  
ATOM   2523  N   ILE   331      72.234  85.143  87.490  0.00  0.00           N  
ATOM   2524  CA  ILE   331      72.687  85.905  88.684  0.00  0.00           C  
ATOM   2525  C   ILE   331      74.023  86.630  88.456  0.00  0.00           C  
ATOM   2526  O   ILE   331      74.251  87.752  88.953  0.00  0.00           O  
ATOM   2527  CB  ILE   331      72.641  85.182  90.022  0.00  0.00           C  
ATOM   2528  CG1 ILE   331      71.423  84.358  90.271  0.00  0.00           C  
ATOM   2529  CG2 ILE   331      72.529  86.205  91.141  0.00  0.00           C  
ATOM   2530  CD1 ILE   331      70.029  84.908  89.848  0.00  0.00           C  
ATOM   2531  N   LEU   332      74.957  86.037  87.687  0.00  0.00           N  
ATOM   2532  CA  LEU   332      76.166  86.714  87.195  0.00  0.00           C  
ATOM   2533  C   LEU   332      75.806  87.971  86.331  0.00  0.00           C  
ATOM   2534  O   LEU   332      76.512  88.956  86.419  0.00  0.00           O  
ATOM   2535  CB  LEU   332      76.976  85.694  86.413  0.00  0.00           C  
ATOM   2536  CG  LEU   332      78.287  86.257  85.708  0.00  0.00           C  
ATOM   2537  CD1 LEU   332      79.277  86.965  86.632  0.00  0.00           C  
ATOM   2538  CD2 LEU   332      79.084  85.289  84.850  0.00  0.00           C  
ATOM   2539  N   ALA   333      74.794  87.883  85.493  0.00  0.00           N  
ATOM   2540  CA  ALA   333      74.255  89.014  84.647  0.00  0.00           C  
ATOM   2541  C   ALA   333      73.543  90.102  85.501  0.00  0.00           C  
ATOM   2542  O   ALA   333      73.585  91.304  85.138  0.00  0.00           O  
ATOM   2543  CB  ALA   333      73.206  88.524  83.636  0.00  0.00           C  
ATOM   2544  N   ALA   334      73.010  89.734  86.666  0.00  0.00           N  
ATOM   2545  CA  ALA   334      72.689  90.599  87.839  0.00  0.00           C  
ATOM   2546  C   ALA   334      73.858  91.131  88.696  0.00  0.00           C  
ATOM   2547  O   ALA   334      73.860  92.258  89.102  0.00  0.00           O  
ATOM   2548  CB  ALA   334      71.580  89.986  88.667  0.00  0.00           C  
ATOM   2549  N   VAL   335      74.941  90.427  88.963  0.00  0.00           N  
ATOM   2550  CA  VAL   335      76.172  90.959  89.495  0.00  0.00           C  
ATOM   2551  C   VAL   335      76.851  92.039  88.583  0.00  0.00           C  
ATOM   2552  O   VAL   335      77.424  93.023  89.169  0.00  0.00           O  
ATOM   2553  CB  VAL   335      77.132  89.846  89.939  0.00  0.00           C  
ATOM   2554  CG1 VAL   335      78.599  90.124  90.339  0.00  0.00           C  
ATOM   2555  CG2 VAL   335      76.460  89.162  91.100  0.00  0.00           C  
ATOM   2556  N   ALA   336      76.777  91.854  87.257  0.00  0.00           N  
ATOM   2557  CA  ALA   336      77.215  92.897  86.353  0.00  0.00           C  
ATOM   2558  C   ALA   336      76.434  94.264  86.398  0.00  0.00           C  
ATOM   2559  O   ALA   336      76.995  95.286  85.950  0.00  0.00           O  
ATOM   2560  CB  ALA   336      77.056  92.348  84.946  0.00  0.00           C  
ATOM   2561  N   LEU   337      75.172  94.295  86.878  0.00  0.00           N  
ATOM   2562  CA  LEU   337      74.342  95.473  87.028  0.00  0.00           C  
ATOM   2563  C   LEU   337      75.022  96.613  87.839  0.00  0.00           C  
ATOM   2564  O   LEU   337      75.234  97.728  87.309  0.00  0.00           O  
ATOM   2565  CB  LEU   337      72.955  95.130  87.506  0.00  0.00           C  
ATOM   2566  CG  LEU   337      72.034  96.311  87.910  0.00  0.00           C  
ATOM   2567  CD1 LEU   337      71.791  97.282  86.812  0.00  0.00           C  
ATOM   2568  CD2 LEU   337      70.716  95.712  88.346  0.00  0.00           C  
ATOM   2569  N   PRO   338      75.341  96.438  89.133  0.00  0.00           N  
ATOM   2570  CA  PRO   338      75.949  97.438  89.922  0.00  0.00           C  
ATOM   2571  C   PRO   338      77.387  97.700  89.397  0.00  0.00           C  
ATOM   2572  O   PRO   338      77.933  98.785  89.572  0.00  0.00           O  
ATOM   2573  CB  PRO   338      75.986  96.983  91.408  0.00  0.00           C  
ATOM   2574  CG  PRO   338      75.913  95.447  91.277  0.00  0.00           C  
ATOM   2575  CD  PRO   338      75.055  95.284  90.025  0.00  0.00           C  
ATOM   2576  N   ALA   339      78.091  96.648  88.867  0.00  0.00           N  
ATOM   2577  CA  ALA   339      79.550  96.679  88.612  0.00  0.00           C  
ATOM   2578  C   ALA   339      79.660  97.548  87.312  0.00  0.00           C  
ATOM   2579  O   ALA   339      80.567  98.400  87.321  0.00  0.00           O  
ATOM   2580  CB  ALA   339      80.125  95.219  88.521  0.00  0.00           C  
ATOM   2581  N   TYR   340      78.888  97.423  86.235  0.00  0.00           N  
ATOM   2582  CA  TYR   340      78.742  98.416  85.205  0.00  0.00           C  
ATOM   2583  C   TYR   340      78.457  99.801  85.683  0.00  0.00           C  
ATOM   2584  O   TYR   340      79.209 100.729  85.329  0.00  0.00           O  
ATOM   2585  CB  TYR   340      77.760  97.866  84.219  0.00  0.00           C  
ATOM   2586  CG  TYR   340      77.360  98.791  83.019  0.00  0.00           C  
ATOM   2587  CD1 TYR   340      77.608  98.252  81.742  0.00  0.00           C  
ATOM   2588  CD2 TYR   340      76.652  99.990  83.185  0.00  0.00           C  
ATOM   2589  CE1 TYR   340      77.357  99.057  80.619  0.00  0.00           C  
ATOM   2590  CE2 TYR   340      76.300 100.770  82.069  0.00  0.00           C  
ATOM   2591  CZ  TYR   340      76.708 100.365  80.781  0.00  0.00           C  
ATOM   2592  OH  TYR   340      76.377 101.121  79.727  0.00  0.00           O  
ATOM   2593  N   GLN   341      77.449  99.937  86.589  0.00  0.00           N  
ATOM   2594  CA  GLN   341      76.968 101.288  86.938  0.00  0.00           C  
ATOM   2595  C   GLN   341      78.040 102.019  87.737  0.00  0.00           C  
ATOM   2596  O   GLN   341      78.335 103.148  87.373  0.00  0.00           O  
ATOM   2597  CB  GLN   341      75.609 101.143  87.666  0.00  0.00           C  
ATOM   2598  CG  GLN   341      74.461 100.655  86.802  0.00  0.00           C  
ATOM   2599  CD  GLN   341      73.112 100.669  87.442  0.00  0.00           C  
ATOM   2600  NE2 GLN   341      72.083 100.794  86.659  0.00  0.00           N  
ATOM   2601  OE1 GLN   341      72.951 100.550  88.627  0.00  0.00           O  
ATOM   2602  N   ASP   342      78.728 101.408  88.698  0.00  0.00           N  
ATOM   2603  CA  ASP   342      79.953 101.955  89.352  0.00  0.00           C  
ATOM   2604  C   ASP   342      81.093 102.403  88.427  0.00  0.00           C  
ATOM   2605  O   ASP   342      81.563 103.576  88.350  0.00  0.00           O  
ATOM   2606  CB  ASP   342      80.413 100.894  90.418  0.00  0.00           C  
ATOM   2607  CG  ASP   342      81.854 101.172  90.957  0.00  0.00           C  
ATOM   2608  OD1 ASP   342      81.984 102.069  91.765  0.00  0.00           O  
ATOM   2609  OD2 ASP   342      82.812 100.446  90.555  0.00  0.00           O1-
ATOM   2610  N   TYR   343      81.489 101.476  87.473  0.00  0.00           N  
ATOM   2611  CA  TYR   343      82.446 101.724  86.384  0.00  0.00           C  
ATOM   2612  C   TYR   343      82.171 102.908  85.486  0.00  0.00           C  
ATOM   2613  O   TYR   343      82.953 103.843  85.488  0.00  0.00           O  
ATOM   2614  CB  TYR   343      82.733 100.416  85.613  0.00  0.00           C  
ATOM   2615  CG  TYR   343      83.277 100.611  84.178  0.00  0.00           C  
ATOM   2616  CD1 TYR   343      84.583 101.234  83.974  0.00  0.00           C  
ATOM   2617  CD2 TYR   343      82.530 100.283  83.036  0.00  0.00           C  
ATOM   2618  CE1 TYR   343      85.192 101.295  82.711  0.00  0.00           C  
ATOM   2619  CE2 TYR   343      83.097 100.537  81.786  0.00  0.00           C  
ATOM   2620  CZ  TYR   343      84.406 101.014  81.588  0.00  0.00           C  
ATOM   2621  OH  TYR   343      84.837 101.313  80.351  0.00  0.00           O  
ATOM   2622  N   THR   344      81.052 102.795  84.742  0.00  0.00           N  
ATOM   2623  CA  THR   344      80.734 103.811  83.703  0.00  0.00           C  
ATOM   2624  C   THR   344      80.588 105.209  84.421  0.00  0.00           C  
ATOM   2625  O   THR   344      81.039 106.160  83.817  0.00  0.00           O  
ATOM   2626  CB  THR   344      79.408 103.511  83.065  0.00  0.00           C  
ATOM   2627  CG2 THR   344      79.517 102.210  82.303  0.00  0.00           C  
ATOM   2628  OG1 THR   344      78.373 103.311  83.975  0.00  0.00           O  
ATOM   2629  N   ALA   345      80.024 105.341  85.553  0.00  0.00           N  
ATOM   2630  CA  ALA   345      79.792 106.685  86.154  0.00  0.00           C  
ATOM   2631  C   ALA   345      81.231 107.263  86.521  0.00  0.00           C  
ATOM   2632  O   ALA   345      81.606 108.474  86.245  0.00  0.00           O  
ATOM   2633  CB  ALA   345      78.963 106.475  87.437  0.00  0.00           C  
ATOM   2634  N   ARG   346      82.045 106.399  87.027  0.00  0.00           N  
ATOM   2635  CA  ARG   346      83.441 106.817  87.226  0.00  0.00           C  
ATOM   2636  C   ARG   346      84.196 107.219  85.895  0.00  0.00           C  
ATOM   2637  O   ARG   346      85.017 108.175  85.885  0.00  0.00           O  
ATOM   2638  CB  ARG   346      84.130 105.795  88.114  0.00  0.00           C  
ATOM   2639  CG  ARG   346      85.619 105.955  88.427  0.00  0.00           C  
ATOM   2640  CD  ARG   346      86.308 104.716  88.966  0.00  0.00           C  
ATOM   2641  NE  ARG   346      87.731 104.756  89.327  0.00  0.00           N  
ATOM   2642  CZ  ARG   346      88.757 104.191  88.685  0.00  0.00           C  
ATOM   2643  NH1 ARG   346      88.619 103.539  87.577  0.00  0.00           N1+
ATOM   2644  NH2 ARG   346      89.954 104.201  89.175  0.00  0.00           N  
ATOM   2645  N   ALA   347      83.992 106.401  84.760  0.00  0.00           N  
ATOM   2646  CA  ALA   347      84.588 106.728  83.487  0.00  0.00           C  
ATOM   2647  C   ALA   347      84.008 108.087  82.857  0.00  0.00           C  
ATOM   2648  O   ALA   347      84.774 108.959  82.416  0.00  0.00           O  
ATOM   2649  CB  ALA   347      84.384 105.509  82.641  0.00  0.00           C  
ATOM   2650  N   GLN   348      82.666 108.320  82.866  0.00  0.00           N  
ATOM   2651  CA  GLN   348      81.948 109.458  82.424  0.00  0.00           C  
ATOM   2652  C   GLN   348      82.211 110.829  83.211  0.00  0.00           C  
ATOM   2653  O   GLN   348      82.530 111.828  82.610  0.00  0.00           O  
ATOM   2654  CB  GLN   348      80.548 109.031  82.649  0.00  0.00           C  
ATOM   2655  CG  GLN   348      80.064 108.116  81.529  0.00  0.00           C  
ATOM   2656  CD  GLN   348      78.902 107.263  81.969  0.00  0.00           C  
ATOM   2657  NE2 GLN   348      78.657 106.239  81.125  0.00  0.00           N  
ATOM   2658  OE1 GLN   348      78.168 107.505  82.914  0.00  0.00           O  
ATOM   2659  N   VAL   349      82.262 110.812  84.536  0.00  0.00           N  
ATOM   2660  CA  VAL   349      82.696 111.970  85.360  0.00  0.00           C  
ATOM   2661  C   VAL   349      84.159 112.261  85.054  0.00  0.00           C  
ATOM   2662  O   VAL   349      84.570 113.409  84.787  0.00  0.00           O  
ATOM   2663  CB  VAL   349      82.494 111.707  86.899  0.00  0.00           C  
ATOM   2664  CG1 VAL   349      82.992 112.737  87.849  0.00  0.00           C  
ATOM   2665  CG2 VAL   349      80.964 111.488  87.191  0.00  0.00           C  
ATOM   2666  N   SER   350      85.046 111.212  85.068  0.00  0.00           N  
ATOM   2667  CA  SER   350      86.468 111.387  84.906  0.00  0.00           C  
ATOM   2668  C   SER   350      86.884 111.992  83.497  0.00  0.00           C  
ATOM   2669  O   SER   350      87.823 112.813  83.462  0.00  0.00           O  
ATOM   2670  CB  SER   350      87.310 110.201  85.239  0.00  0.00           C  
ATOM   2671  OG  SER   350      87.109 109.082  84.487  0.00  0.00           O  
ATOM   2672  N   GLU   351      86.042 111.809  82.448  0.00  0.00           N  
ATOM   2673  CA  GLU   351      86.087 112.479  81.146  0.00  0.00           C  
ATOM   2674  C   GLU   351      85.826 113.946  81.186  0.00  0.00           C  
ATOM   2675  O   GLU   351      86.510 114.791  80.618  0.00  0.00           O  
ATOM   2676  CB  GLU   351      85.239 111.615  80.196  0.00  0.00           C  
ATOM   2677  CG  GLU   351      85.021 112.317  78.859  0.00  0.00           C  
ATOM   2678  CD  GLU   351      84.110 111.460  77.961  0.00  0.00           C  
ATOM   2679  OE1 GLU   351      83.082 112.047  77.486  0.00  0.00           O  
ATOM   2680  OE2 GLU   351      84.430 110.275  77.708  0.00  0.00           O1-
ATOM   2681  N   ALA   352      84.774 114.294  81.943  0.00  0.00           N  
ATOM   2682  CA  ALA   352      84.261 115.613  81.963  0.00  0.00           C  
ATOM   2683  C   ALA   352      85.363 116.535  82.594  0.00  0.00           C  
ATOM   2684  O   ALA   352      85.507 117.722  82.153  0.00  0.00           O  
ATOM   2685  CB  ALA   352      82.934 115.647  82.731  0.00  0.00           C  
ATOM   2686  N   ILE   353      86.054 115.949  83.566  0.00  0.00           N  
ATOM   2687  CA  ILE   353      87.094 116.779  84.292  0.00  0.00           C  
ATOM   2688  C   ILE   353      88.246 116.891  83.319  0.00  0.00           C  
ATOM   2689  O   ILE   353      88.774 118.025  83.142  0.00  0.00           O  
ATOM   2690  CB  ILE   353      87.487 116.132  85.606  0.00  0.00           C  
ATOM   2691  CG1 ILE   353      86.255 115.991  86.543  0.00  0.00           C  
ATOM   2692  CG2 ILE   353      88.665 116.875  86.216  0.00  0.00           C  
ATOM   2693  CD1 ILE   353      85.477 117.263  86.792  0.00  0.00           C  
ATOM   2694  N   LEU   354      88.603 115.868  82.545  0.00  0.00           N  
ATOM   2695  CA  LEU   354      89.664 115.996  81.545  0.00  0.00           C  
ATOM   2696  C   LEU   354      89.394 116.864  80.324  0.00  0.00           C  
ATOM   2697  O   LEU   354      90.405 117.314  79.743  0.00  0.00           O  
ATOM   2698  CB  LEU   354      90.157 114.506  81.181  0.00  0.00           C  
ATOM   2699  CG  LEU   354      91.615 114.367  80.672  0.00  0.00           C  
ATOM   2700  CD1 LEU   354      92.660 114.475  81.869  0.00  0.00           C  
ATOM   2701  CD2 LEU   354      91.917 113.057  79.966  0.00  0.00           C  
ATOM   2702  N   LEU   355      88.106 117.235  80.083  0.00  0.00           N  
ATOM   2703  CA  LEU   355      87.839 118.145  79.005  0.00  0.00           C  
ATOM   2704  C   LEU   355      87.680 119.532  79.637  0.00  0.00           C  
ATOM   2705  O   LEU   355      87.905 120.528  78.884  0.00  0.00           O  
ATOM   2706  CB  LEU   355      86.581 117.717  78.296  0.00  0.00           C  
ATOM   2707  CG  LEU   355      86.820 116.409  77.395  0.00  0.00           C  
ATOM   2708  CD1 LEU   355      85.491 115.685  77.031  0.00  0.00           C  
ATOM   2709  CD2 LEU   355      87.559 116.806  76.111  0.00  0.00           C  
ATOM   2710  N   ALA   356      87.532 119.722  81.003  0.00  0.00           N  
ATOM   2711  CA  ALA   356      87.777 120.968  81.667  0.00  0.00           C  
ATOM   2712  C   ALA   356      89.280 121.348  81.914  0.00  0.00           C  
ATOM   2713  O   ALA   356      89.674 122.518  81.845  0.00  0.00           O  
ATOM   2714  CB  ALA   356      87.020 120.971  82.993  0.00  0.00           C  
ATOM   2715  N   GLU   357      90.163 120.375  82.074  0.00  0.00           N  
ATOM   2716  CA  GLU   357      91.614 120.632  81.988  0.00  0.00           C  
ATOM   2717  C   GLU   357      91.982 121.214  80.606  0.00  0.00           C  
ATOM   2718  O   GLU   357      91.326 121.052  79.590  0.00  0.00           O  
ATOM   2719  CB  GLU   357      92.411 119.306  82.302  0.00  0.00           C  
ATOM   2720  CG  GLU   357      92.703 119.326  83.858  0.00  0.00           C  
ATOM   2721  CD  GLU   357      93.809 120.420  84.120  0.00  0.00           C  
ATOM   2722  OE1 GLU   357      94.255 121.104  83.170  0.00  0.00           O  
ATOM   2723  OE2 GLU   357      94.356 120.373  85.256  0.00  0.00           O1-
ATOM   2724  N   GLY   358      93.036 122.019  80.533  0.00  0.00           N  
ATOM   2725  CA  GLY   358      93.403 122.980  79.427  0.00  0.00           C  
ATOM   2726  C   GLY   358      92.510 124.254  79.415  0.00  0.00           C  
ATOM   2727  O   GLY   358      93.001 125.386  79.549  0.00  0.00           O  
ATOM   2728  N   GLN   359      91.169 123.955  79.274  0.00  0.00           N  
ATOM   2729  CA  GLN   359      90.124 124.981  79.425  0.00  0.00           C  
ATOM   2730  C   GLN   359      90.248 125.788  80.739  0.00  0.00           C  
ATOM   2731  O   GLN   359      90.217 127.030  80.713  0.00  0.00           O  
ATOM   2732  CB  GLN   359      88.679 124.350  79.142  0.00  0.00           C  
ATOM   2733  CG  GLN   359      87.536 125.007  79.871  0.00  0.00           C  
ATOM   2734  CD  GLN   359      86.191 124.884  79.114  0.00  0.00           C  
ATOM   2735  NE2 GLN   359      85.974 123.910  78.244  0.00  0.00           N  
ATOM   2736  OE1 GLN   359      85.306 125.643  79.366  0.00  0.00           O  
ATOM   2737  N   LYS   360      90.597 125.146  81.785  0.00  0.00           N  
ATOM   2738  CA  LYS   360      91.030 125.616  83.048  0.00  0.00           C  
ATOM   2739  C   LYS   360      92.259 126.616  82.952  0.00  0.00           C  
ATOM   2740  O   LYS   360      92.115 127.713  83.528  0.00  0.00           O  
ATOM   2741  CB  LYS   360      91.349 124.411  83.955  0.00  0.00           C  
ATOM   2742  CG  LYS   360      91.915 124.673  85.336  0.00  0.00           C  
ATOM   2743  CD  LYS   360      92.177 123.465  86.116  0.00  0.00           C  
ATOM   2744  CE  LYS   360      93.544 123.478  86.807  0.00  0.00           C  
ATOM   2745  NZ  LYS   360      93.946 122.142  87.342  0.00  0.00           N1+
ATOM   2746  N   SER   361      93.423 126.192  82.434  0.00  0.00           N  
ATOM   2747  CA  SER   361      94.630 127.019  82.226  0.00  0.00           C  
ATOM   2748  C   SER   361      94.299 128.244  81.391  0.00  0.00           C  
ATOM   2749  O   SER   361      94.799 129.322  81.701  0.00  0.00           O  
ATOM   2750  CB  SER   361      95.600 126.131  81.470  0.00  0.00           C  
ATOM   2751  OG  SER   361      95.530 124.766  81.761  0.00  0.00           O  
ATOM   2752  N   ALA   362      93.547 128.160  80.324  0.00  0.00           N  
ATOM   2753  CA  ALA   362      93.174 129.281  79.456  0.00  0.00           C  
ATOM   2754  C   ALA   362      92.371 130.288  80.235  0.00  0.00           C  
ATOM   2755  O   ALA   362      92.635 131.469  80.107  0.00  0.00           O  
ATOM   2756  CB  ALA   362      92.425 128.748  78.243  0.00  0.00           C  
ATOM   2757  N   VAL   363      91.445 129.754  81.092  0.00  0.00           N  
ATOM   2758  CA  VAL   363      90.660 130.666  81.982  0.00  0.00           C  
ATOM   2759  C   VAL   363      91.586 131.349  82.989  0.00  0.00           C  
ATOM   2760  O   VAL   363      91.491 132.534  83.288  0.00  0.00           O  
ATOM   2761  CB  VAL   363      89.420 129.977  82.580  0.00  0.00           C  
ATOM   2762  CG1 VAL   363      88.795 131.023  83.545  0.00  0.00           C  
ATOM   2763  CG2 VAL   363      88.408 129.509  81.485  0.00  0.00           C  
ATOM   2764  N   THR   364      92.499 130.602  83.637  0.00  0.00           N  
ATOM   2765  CA  THR   364      93.500 131.046  84.664  0.00  0.00           C  
ATOM   2766  C   THR   364      94.404 132.193  84.188  0.00  0.00           C  
ATOM   2767  O   THR   364      94.612 133.207  84.867  0.00  0.00           O  
ATOM   2768  CB  THR   364      94.369 129.865  85.025  0.00  0.00           C  
ATOM   2769  CG2 THR   364      95.686 130.062  85.873  0.00  0.00           C  
ATOM   2770  OG1 THR   364      93.516 128.913  85.778  0.00  0.00           O  
ATOM   2771  N   GLU   365      94.913 132.079  82.950  0.00  0.00           N  
ATOM   2772  CA  GLU   365      95.710 133.111  82.332  0.00  0.00           C  
ATOM   2773  C   GLU   365      94.948 134.365  82.065  0.00  0.00           C  
ATOM   2774  O   GLU   365      95.499 135.478  82.224  0.00  0.00           O  
ATOM   2775  CB  GLU   365      96.373 132.562  81.054  0.00  0.00           C  
ATOM   2776  CG  GLU   365      97.413 131.395  81.186  0.00  0.00           C  
ATOM   2777  CD  GLU   365      98.632 131.688  82.074  0.00  0.00           C  
ATOM   2778  OE1 GLU   365      98.782 132.840  82.560  0.00  0.00           O  
ATOM   2779  OE2 GLU   365      99.611 130.898  82.133  0.00  0.00           O1-
ATOM   2780  N   TYR   366      93.721 134.268  81.622  0.00  0.00           N  
ATOM   2781  CA  TYR   366      93.003 135.461  81.349  0.00  0.00           C  
ATOM   2782  C   TYR   366      92.849 136.398  82.607  0.00  0.00           C  
ATOM   2783  O   TYR   366      93.333 137.506  82.704  0.00  0.00           O  
ATOM   2784  CB  TYR   366      91.643 135.020  80.812  0.00  0.00           C  
ATOM   2785  CG  TYR   366      90.749 136.246  80.675  0.00  0.00           C  
ATOM   2786  CD1 TYR   366      90.761 136.866  79.399  0.00  0.00           C  
ATOM   2787  CD2 TYR   366      89.889 136.806  81.662  0.00  0.00           C  
ATOM   2788  CE1 TYR   366      89.854 137.959  79.143  0.00  0.00           C  
ATOM   2789  CE2 TYR   366      88.934 137.810  81.375  0.00  0.00           C  
ATOM   2790  CZ  TYR   366      88.910 138.384  80.114  0.00  0.00           C  
ATOM   2791  OH  TYR   366      88.005 139.326  79.830  0.00  0.00           O  
ATOM   2792  N   TYR   367      92.477 135.766  83.727  0.00  0.00           N  
ATOM   2793  CA  TYR   367      92.300 136.253  85.078  0.00  0.00           C  
ATOM   2794  C   TYR   367      93.631 136.729  85.621  0.00  0.00           C  
ATOM   2795  O   TYR   367      93.679 137.857  86.123  0.00  0.00           O  
ATOM   2796  CB  TYR   367      91.761 135.170  85.934  0.00  0.00           C  
ATOM   2797  CG  TYR   367      91.535 135.515  87.405  0.00  0.00           C  
ATOM   2798  CD1 TYR   367      90.420 136.236  87.813  0.00  0.00           C  
ATOM   2799  CD2 TYR   367      92.529 135.259  88.360  0.00  0.00           C  
ATOM   2800  CE1 TYR   367      90.219 136.594  89.143  0.00  0.00           C  
ATOM   2801  CE2 TYR   367      92.405 135.671  89.697  0.00  0.00           C  
ATOM   2802  CZ  TYR   367      91.239 136.350  90.110  0.00  0.00           C  
ATOM   2803  OH  TYR   367      90.960 136.701  91.379  0.00  0.00           O  
ATOM   2804  N   LEU   368      94.735 135.996  85.502  0.00  0.00           N  
ATOM   2805  CA  LEU   368      96.041 136.356  86.043  0.00  0.00           C  
ATOM   2806  C   LEU   368      96.629 137.580  85.347  0.00  0.00           C  
ATOM   2807  O   LEU   368      97.536 138.204  85.883  0.00  0.00           O  
ATOM   2808  CB  LEU   368      96.872 135.115  85.855  0.00  0.00           C  
ATOM   2809  CG  LEU   368      98.308 135.244  86.295  0.00  0.00           C  
ATOM   2810  CD1 LEU   368      98.368 135.262  87.888  0.00  0.00           C  
ATOM   2811  CD2 LEU   368      99.175 134.128  85.803  0.00  0.00           C  
ATOM   2812  N   ASN   369      96.084 137.983  84.233  0.00  0.00           N  
ATOM   2813  CA  ASN   369      96.453 139.224  83.557  0.00  0.00           C  
ATOM   2814  C   ASN   369      95.363 140.333  83.487  0.00  0.00           C  
ATOM   2815  O   ASN   369      95.644 141.443  83.919  0.00  0.00           O  
ATOM   2816  CB  ASN   369      96.926 138.977  82.105  0.00  0.00           C  
ATOM   2817  CG  ASN   369      98.230 138.168  82.022  0.00  0.00           C  
ATOM   2818  ND2 ASN   369      98.044 136.884  82.254  0.00  0.00           N  
ATOM   2819  OD1 ASN   369      99.374 138.613  81.846  0.00  0.00           O  
ATOM   2820  N   HIE   370      94.150 140.168  82.991  0.00  0.00           N  
ATOM   2821  CA  HIE   370      93.042 141.112  82.900  0.00  0.00           C  
ATOM   2822  C   HIE   370      92.448 141.493  84.183  0.00  0.00           C  
ATOM   2823  O   HIE   370      91.875 142.617  84.313  0.00  0.00           O  
ATOM   2824  CB  HIE   370      91.939 140.549  81.940  0.00  0.00           C  
ATOM   2825  CG  HIE   370      92.441 140.190  80.531  0.00  0.00           C  
ATOM   2826  CD2 HIE   370      92.053 140.782  79.332  0.00  0.00           C  
ATOM   2827  ND1 HIE   370      93.442 139.313  80.180  0.00  0.00           N  
ATOM   2828  CE1 HIE   370      93.557 139.322  78.859  0.00  0.00           C  
ATOM   2829  NE2 HIE   370      92.784 140.242  78.316  0.00  0.00           N  
ATOM   2830  N   GLY   371      92.557 140.576  85.194  0.00  0.00           N  
ATOM   2831  CA  GLY   371      92.177 140.721  86.604  0.00  0.00           C  
ATOM   2832  C   GLY   371      90.709 140.409  86.991  0.00  0.00           C  
ATOM   2833  O   GLY   371      90.408 140.284  88.142  0.00  0.00           O  
ATOM   2834  N   LYS   372      89.800 140.252  86.004  0.00  0.00           N  
ATOM   2835  CA  LYS   372      88.433 139.663  86.203  0.00  0.00           C  
ATOM   2836  C   LYS   372      88.366 138.305  85.609  0.00  0.00           C  
ATOM   2837  O   LYS   372      89.322 137.845  84.933  0.00  0.00           O  
ATOM   2838  CB  LYS   372      87.488 140.673  85.528  0.00  0.00           C  
ATOM   2839  CG  LYS   372      87.445 142.012  86.302  0.00  0.00           C  
ATOM   2840  CD  LYS   372      87.033 141.807  87.801  0.00  0.00           C  
ATOM   2841  CE  LYS   372      86.762 143.155  88.498  0.00  0.00           C  
ATOM   2842  NZ  LYS   372      86.234 143.064  89.814  0.00  0.00           N1+
ATOM   2843  N   TRP   373      87.296 137.554  85.939  0.00  0.00           N  
ATOM   2844  CA  TRP   373      86.871 136.285  85.343  0.00  0.00           C  
ATOM   2845  C   TRP   373      86.273 136.442  83.928  0.00  0.00           C  
ATOM   2846  O   TRP   373      85.536 137.416  83.716  0.00  0.00           O  
ATOM   2847  CB  TRP   373      85.924 135.535  86.312  0.00  0.00           C  
ATOM   2848  CG  TRP   373      86.603 134.903  87.509  0.00  0.00           C  
ATOM   2849  CD1 TRP   373      86.361 135.475  88.727  0.00  0.00           C  
ATOM   2850  CD2 TRP   373      87.736 133.998  87.691  0.00  0.00           C  
ATOM   2851  CE2 TRP   373      88.123 134.101  89.108  0.00  0.00           C  
ATOM   2852  CE3 TRP   373      88.639 133.261  86.854  0.00  0.00           C  
ATOM   2853  NE1 TRP   373      87.143 134.860  89.651  0.00  0.00           N  
ATOM   2854  CZ2 TRP   373      89.265 133.493  89.632  0.00  0.00           C  
ATOM   2855  CZ3 TRP   373      89.886 132.824  87.396  0.00  0.00           C  
ATOM   2856  CH2 TRP   373      90.156 132.862  88.725  0.00  0.00           C  
ATOM   2857  N   PRO   374      86.668 135.615  82.917  0.00  0.00           N  
ATOM   2858  CA  PRO   374      86.025 135.707  81.617  0.00  0.00           C  
ATOM   2859  C   PRO   374      84.526 135.315  81.787  0.00  0.00           C  
ATOM   2860  O   PRO   374      84.064 134.606  82.678  0.00  0.00           O  
ATOM   2861  CB  PRO   374      86.795 134.688  80.758  0.00  0.00           C  
ATOM   2862  CG  PRO   374      87.310 133.684  81.725  0.00  0.00           C  
ATOM   2863  CD  PRO   374      87.678 134.537  82.914  0.00  0.00           C  
ATOM   2864  N   GLU   375      83.766 135.739  80.831  0.00  0.00           N  
ATOM   2865  CA  GLU   375      82.272 135.495  80.793  0.00  0.00           C  
ATOM   2866  C   GLU   375      81.882 134.109  80.150  0.00  0.00           C  
ATOM   2867  O   GLU   375      81.046 133.494  80.757  0.00  0.00           O  
ATOM   2868  CB  GLU   375      81.532 136.755  80.095  0.00  0.00           C  
ATOM   2869  CG  GLU   375      80.027 136.579  79.816  0.00  0.00           C  
ATOM   2870  CD  GLU   375      79.300 137.787  79.313  0.00  0.00           C  
ATOM   2871  OE1 GLU   375      79.969 138.829  79.024  0.00  0.00           O  
ATOM   2872  OE2 GLU   375      78.058 137.646  79.206  0.00  0.00           O1-
ATOM   2873  N   ASN   376      82.450 133.732  78.994  0.00  0.00           N  
ATOM   2874  CA  ASN   376      82.077 132.625  78.186  0.00  0.00           C  
ATOM   2875  C   ASN   376      83.329 131.950  77.517  0.00  0.00           C  
ATOM   2876  O   ASN   376      84.349 132.610  77.423  0.00  0.00           O  
ATOM   2877  CB  ASN   376      81.012 133.136  77.133  0.00  0.00           C  
ATOM   2878  CG  ASN   376      81.606 133.934  75.985  0.00  0.00           C  
ATOM   2879  ND2 ASN   376      81.468 133.565  74.710  0.00  0.00           N  
ATOM   2880  OD1 ASN   376      82.192 134.982  76.233  0.00  0.00           O  
ATOM   2881  N   ASN   377      83.158 130.863  76.704  0.00  0.00           N  
ATOM   2882  CA  ASN   377      84.223 130.211  76.026  0.00  0.00           C  
ATOM   2883  C   ASN   377      85.082 131.138  75.116  0.00  0.00           C  
ATOM   2884  O   ASN   377      86.245 131.071  75.047  0.00  0.00           O  
ATOM   2885  CB  ASN   377      83.772 129.124  75.059  0.00  0.00           C  
ATOM   2886  CG  ASN   377      83.062 127.943  75.710  0.00  0.00           C  
ATOM   2887  ND2 ASN   377      82.842 126.915  74.960  0.00  0.00           N  
ATOM   2888  OD1 ASN   377      82.515 128.002  76.809  0.00  0.00           O  
ATOM   2889  N   THR   378      84.362 132.057  74.472  0.00  0.00           N  
ATOM   2890  CA  THR   378      84.880 133.083  73.502  0.00  0.00           C  
ATOM   2891  C   THR   378      85.551 134.388  74.067  0.00  0.00           C  
ATOM   2892  O   THR   378      86.177 135.117  73.375  0.00  0.00           O  
ATOM   2893  CB  THR   378      83.986 133.297  72.249  0.00  0.00           C  
ATOM   2894  CG2 THR   378      83.255 132.037  71.835  0.00  0.00           C  
ATOM   2895  OG1 THR   378      83.042 134.286  72.600  0.00  0.00           O  
ATOM   2896  N   SER   379      85.451 134.627  75.379  0.00  0.00           N  
ATOM   2897  CA  SER   379      86.277 135.537  76.099  0.00  0.00           C  
ATOM   2898  C   SER   379      87.403 134.825  76.712  0.00  0.00           C  
ATOM   2899  O   SER   379      88.549 135.235  76.620  0.00  0.00           O  
ATOM   2900  CB  SER   379      85.511 136.406  77.159  0.00  0.00           C  
ATOM   2901  OG  SER   379      84.436 135.764  77.740  0.00  0.00           O  
ATOM   2902  N   ALA   380      87.132 133.552  77.234  0.00  0.00           N  
ATOM   2903  CA  ALA   380      88.195 132.670  77.868  0.00  0.00           C  
ATOM   2904  C   ALA   380      89.169 132.137  76.863  0.00  0.00           C  
ATOM   2905  O   ALA   380      90.193 131.523  77.228  0.00  0.00           O  
ATOM   2906  CB  ALA   380      87.430 131.558  78.607  0.00  0.00           C  
ATOM   2907  N   GLY   381      89.010 132.334  75.550  0.00  0.00           N  
ATOM   2908  CA  GLY   381      89.994 132.067  74.484  0.00  0.00           C  
ATOM   2909  C   GLY   381      90.050 130.553  74.120  0.00  0.00           C  
ATOM   2910  O   GLY   381      91.001 130.209  73.471  0.00  0.00           O  
ATOM   2911  N   VAL   382      89.122 129.703  74.504  0.00  0.00           N  
ATOM   2912  CA  VAL   382      88.915 128.263  74.318  0.00  0.00           C  
ATOM   2913  C   VAL   382      87.978 127.862  73.090  0.00  0.00           C  
ATOM   2914  O   VAL   382      87.480 128.851  72.436  0.00  0.00           O  
ATOM   2915  CB  VAL   382      88.502 127.565  75.674  0.00  0.00           C  
ATOM   2916  CG1 VAL   382      89.432 127.992  76.810  0.00  0.00           C  
ATOM   2917  CG2 VAL   382      87.084 127.649  76.202  0.00  0.00           C  
ATOM   2918  N   ALA   383      87.734 126.623  72.669  0.00  0.00           N  
ATOM   2919  CA  ALA   383      86.793 126.285  71.545  0.00  0.00           C  
ATOM   2920  C   ALA   383      85.466 127.092  71.462  0.00  0.00           C  
ATOM   2921  O   ALA   383      84.818 127.357  72.494  0.00  0.00           O  
ATOM   2922  CB  ALA   383      86.506 124.815  71.610  0.00  0.00           C  
ATOM   2923  N   SER   384      85.128 127.667  70.288  0.00  0.00           N  
ATOM   2924  CA  SER   384      84.202 128.674  70.178  0.00  0.00           C  
ATOM   2925  C   SER   384      82.751 128.278  70.477  0.00  0.00           C  
ATOM   2926  O   SER   384      81.875 129.142  70.654  0.00  0.00           O  
ATOM   2927  CB  SER   384      84.203 129.287  68.726  0.00  0.00           C  
ATOM   2928  OG  SER   384      84.059 128.253  67.826  0.00  0.00           O  
ATOM   2929  N   SER   385      82.530 126.970  70.630  0.00  0.00           N  
ATOM   2930  CA  SER   385      81.241 126.341  71.183  0.00  0.00           C  
ATOM   2931  C   SER   385      81.548 125.159  72.180  0.00  0.00           C  
ATOM   2932  O   SER   385      82.568 124.445  72.000  0.00  0.00           O  
ATOM   2933  CB  SER   385      80.417 125.876  69.986  0.00  0.00           C  
ATOM   2934  OG  SER   385      79.295 125.108  70.442  0.00  0.00           O  
ATOM   2935  N   PRO   386      80.654 124.865  73.171  0.00  0.00           N  
ATOM   2936  CA  PRO   386      80.769 123.684  74.055  0.00  0.00           C  
ATOM   2937  C   PRO   386      80.616 122.349  73.314  0.00  0.00           C  
ATOM   2938  O   PRO   386      81.247 121.390  73.695  0.00  0.00           O  
ATOM   2939  CB  PRO   386      79.629 123.952  75.059  0.00  0.00           C  
ATOM   2940  CG  PRO   386      79.319 125.485  75.047  0.00  0.00           C  
ATOM   2941  CD  PRO   386      79.579 125.785  73.551  0.00  0.00           C  
ATOM   2942  N   THR   387      79.945 122.422  72.123  0.00  0.00           N  
ATOM   2943  CA  THR   387      79.799 121.252  71.241  0.00  0.00           C  
ATOM   2944  C   THR   387      80.997 120.878  70.384  0.00  0.00           C  
ATOM   2945  O   THR   387      81.151 119.693  70.136  0.00  0.00           O  
ATOM   2946  CB  THR   387      78.437 121.343  70.363  0.00  0.00           C  
ATOM   2947  CG2 THR   387      77.218 121.918  71.076  0.00  0.00           C  
ATOM   2948  OG1 THR   387      78.566 122.136  69.214  0.00  0.00           O  
ATOM   2949  N   ASP   388      81.947 121.858  70.230  0.00  0.00           N  
ATOM   2950  CA  ASP   388      83.318 121.606  69.680  0.00  0.00           C  
ATOM   2951  C   ASP   388      84.216 120.570  70.285  0.00  0.00           C  
ATOM   2952  O   ASP   388      84.793 119.730  69.686  0.00  0.00           O  
ATOM   2953  CB  ASP   388      84.041 122.983  69.603  0.00  0.00           C  
ATOM   2954  CG  ASP   388      83.433 124.057  68.659  0.00  0.00           C  
ATOM   2955  OD1 ASP   388      82.423 123.817  67.930  0.00  0.00           O  
ATOM   2956  OD2 ASP   388      84.071 125.114  68.551  0.00  0.00           O1-
ATOM   2957  N   ILE   389      84.140 120.444  71.653  0.00  0.00           N  
ATOM   2958  CA  ILE   389      84.830 119.528  72.543  0.00  0.00           C  
ATOM   2959  C   ILE   389      83.829 118.490  73.185  0.00  0.00           C  
ATOM   2960  O   ILE   389      84.005 118.112  74.312  0.00  0.00           O  
ATOM   2961  CB  ILE   389      85.690 120.368  73.571  0.00  0.00           C  
ATOM   2962  CG1 ILE   389      84.842 121.470  74.248  0.00  0.00           C  
ATOM   2963  CG2 ILE   389      86.983 120.843  72.936  0.00  0.00           C  
ATOM   2964  CD1 ILE   389      85.689 121.933  75.442  0.00  0.00           C  
ATOM   2965  N   LYS   390      82.727 118.203  72.552  0.00  0.00           N  
ATOM   2966  CA  LYS   390      81.856 117.089  72.891  0.00  0.00           C  
ATOM   2967  C   LYS   390      82.626 115.787  72.942  0.00  0.00           C  
ATOM   2968  O   LYS   390      83.436 115.536  72.011  0.00  0.00           O  
ATOM   2969  CB  LYS   390      80.812 117.004  71.797  0.00  0.00           C  
ATOM   2970  CG  LYS   390      79.662 115.995  71.821  0.00  0.00           C  
ATOM   2971  CD  LYS   390      79.906 114.753  70.977  0.00  0.00           C  
ATOM   2972  CE  LYS   390      78.643 113.903  71.077  0.00  0.00           C  
ATOM   2973  NZ  LYS   390      78.787 112.729  70.195  0.00  0.00           N1+
ATOM   2974  N   GLY   391      82.460 115.046  74.070  0.00  0.00           N  
ATOM   2975  CA  GLY   391      83.189 113.820  74.393  0.00  0.00           C  
ATOM   2976  C   GLY   391      82.427 112.528  73.968  0.00  0.00           C  
ATOM   2977  O   GLY   391      81.533 112.535  73.120  0.00  0.00           O  
ATOM   2978  N   LYS   392      82.766 111.381  74.510  0.00  0.00           N  
ATOM   2979  CA  LYS   392      82.022 110.144  74.258  0.00  0.00           C  
ATOM   2980  C   LYS   392      80.752 110.043  75.057  0.00  0.00           C  
ATOM   2981  O   LYS   392      79.807 109.381  74.622  0.00  0.00           O  
ATOM   2982  CB  LYS   392      82.930 108.914  74.526  0.00  0.00           C  
ATOM   2983  CG  LYS   392      82.585 107.526  73.833  0.00  0.00           C  
ATOM   2984  CD  LYS   392      83.950 106.793  73.775  0.00  0.00           C  
ATOM   2985  CE  LYS   392      83.577 105.339  73.283  0.00  0.00           C  
ATOM   2986  NZ  LYS   392      82.953 104.379  74.217  0.00  0.00           N1+
ATOM   2987  N   TYR   393      80.717 110.675  76.247  0.00  0.00           N  
ATOM   2988  CA  TYR   393      79.585 110.764  77.167  0.00  0.00           C  
ATOM   2989  C   TYR   393      79.182 112.170  77.551  0.00  0.00           C  
ATOM   2990  O   TYR   393      78.050 112.449  77.775  0.00  0.00           O  
ATOM   2991  CB  TYR   393      79.840 109.955  78.436  0.00  0.00           C  
ATOM   2992  CG  TYR   393      80.213 108.475  78.259  0.00  0.00           C  
ATOM   2993  CD1 TYR   393      81.509 108.038  78.032  0.00  0.00           C  
ATOM   2994  CD2 TYR   393      79.274 107.371  78.341  0.00  0.00           C  
ATOM   2995  CE1 TYR   393      81.829 106.661  77.913  0.00  0.00           C  
ATOM   2996  CE2 TYR   393      79.530 105.993  78.213  0.00  0.00           C  
ATOM   2997  CZ  TYR   393      80.861 105.643  77.935  0.00  0.00           C  
ATOM   2998  OH  TYR   393      81.246 104.357  77.842  0.00  0.00           O  
ATOM   2999  N   VAL   394      80.198 113.020  77.654  0.00  0.00           N  
ATOM   3000  CA  VAL   394      80.004 114.518  77.611  0.00  0.00           C  
ATOM   3001  C   VAL   394      79.249 114.987  76.314  0.00  0.00           C  
ATOM   3002  O   VAL   394      79.686 114.705  75.167  0.00  0.00           O  
ATOM   3003  CB  VAL   394      81.363 115.223  77.760  0.00  0.00           C  
ATOM   3004  CG1 VAL   394      81.221 116.747  77.544  0.00  0.00           C  
ATOM   3005  CG2 VAL   394      81.794 115.115  79.171  0.00  0.00           C  
ATOM   3006  N   LYS   395      78.140 115.723  76.497  0.00  0.00           N  
ATOM   3007  CA  LYS   395      77.396 116.519  75.483  0.00  0.00           C  
ATOM   3008  C   LYS   395      78.013 117.929  75.321  0.00  0.00           C  
ATOM   3009  O   LYS   395      78.149 118.468  74.214  0.00  0.00           O  
ATOM   3010  CB  LYS   395      75.926 116.638  75.884  0.00  0.00           C  
ATOM   3011  CG  LYS   395      75.120 117.365  74.879  0.00  0.00           C  
ATOM   3012  CD  LYS   395      73.659 117.443  75.396  0.00  0.00           C  
ATOM   3013  CE  LYS   395      72.674 117.788  74.264  0.00  0.00           C  
ATOM   3014  NZ  LYS   395      72.684 119.214  73.992  0.00  0.00           N1+
ATOM   3015  N   GLU   396      78.450 118.655  76.410  0.00  0.00           N  
ATOM   3016  CA  GLU   396      78.948 120.072  76.453  0.00  0.00           C  
ATOM   3017  C   GLU   396      79.941 120.357  77.554  0.00  0.00           C  
ATOM   3018  O   GLU   396      79.749 119.805  78.641  0.00  0.00           O  
ATOM   3019  CB  GLU   396      77.778 120.956  76.653  0.00  0.00           C  
ATOM   3020  CG  GLU   396      76.937 121.116  75.373  0.00  0.00           C  
ATOM   3021  CD  GLU   396      75.742 122.052  75.555  0.00  0.00           C  
ATOM   3022  OE1 GLU   396      75.598 122.697  76.607  0.00  0.00           O  
ATOM   3023  OE2 GLU   396      75.025 122.315  74.527  0.00  0.00           O1-
ATOM   3024  N   VAL   397      80.991 121.234  77.336  0.00  0.00           N  
ATOM   3025  CA  VAL   397      81.747 122.010  78.413  0.00  0.00           C  
ATOM   3026  C   VAL   397      81.718 123.485  78.065  0.00  0.00           C  
ATOM   3027  O   VAL   397      82.301 123.916  77.022  0.00  0.00           O  
ATOM   3028  CB  VAL   397      83.084 121.360  78.629  0.00  0.00           C  
ATOM   3029  CG1 VAL   397      83.719 121.919  79.922  0.00  0.00           C  
ATOM   3030  CG2 VAL   397      83.123 119.791  78.693  0.00  0.00           C  
ATOM   3031  N   GLU   398      81.159 124.245  79.023  0.00  0.00           N  
ATOM   3032  CA  GLU   398      80.816 125.621  78.880  0.00  0.00           C  
ATOM   3033  C   GLU   398      81.430 126.524  79.988  0.00  0.00           C  
ATOM   3034  O   GLU   398      81.069 126.290  81.152  0.00  0.00           O  
ATOM   3035  CB  GLU   398      79.296 125.769  78.818  0.00  0.00           C  
ATOM   3036  CG  GLU   398      78.823 127.216  78.814  0.00  0.00           C  
ATOM   3037  CD  GLU   398      77.333 127.441  78.431  0.00  0.00           C  
ATOM   3038  OE1 GLU   398      76.603 126.481  78.413  0.00  0.00           O  
ATOM   3039  OE2 GLU   398      76.865 128.583  78.086  0.00  0.00           O1-
ATOM   3040  N   VAL   399      82.202 127.574  79.699  0.00  0.00           N  
ATOM   3041  CA  VAL   399      82.507 128.534  80.738  0.00  0.00           C  
ATOM   3042  C   VAL   399      81.257 129.320  81.165  0.00  0.00           C  
ATOM   3043  O   VAL   399      80.565 129.937  80.365  0.00  0.00           O  
ATOM   3044  CB  VAL   399      83.784 129.403  80.561  0.00  0.00           C  
ATOM   3045  CG1 VAL   399      84.372 129.890  81.827  0.00  0.00           C  
ATOM   3046  CG2 VAL   399      84.873 128.550  79.956  0.00  0.00           C  
ATOM   3047  N   LYS   400      81.025 129.497  82.473  0.00  0.00           N  
ATOM   3048  CA  LYS   400      80.042 130.474  83.031  0.00  0.00           C  
ATOM   3049  C   LYS   400      80.720 131.367  84.007  0.00  0.00           C  
ATOM   3050  O   LYS   400      80.934 130.903  85.134  0.00  0.00           O  
ATOM   3051  CB  LYS   400      78.919 129.679  83.692  0.00  0.00           C  
ATOM   3052  CG  LYS   400      77.890 128.874  82.881  0.00  0.00           C  
ATOM   3053  CD  LYS   400      77.055 129.758  81.853  0.00  0.00           C  
ATOM   3054  CE  LYS   400      75.829 128.908  81.457  0.00  0.00           C  
ATOM   3055  NZ  LYS   400      75.066 129.347  80.283  0.00  0.00           N1+
ATOM   3056  N   ASN   401      81.204 132.560  83.571  0.00  0.00           N  
ATOM   3057  CA  ASN   401      81.678 133.569  84.515  0.00  0.00           C  
ATOM   3058  C   ASN   401      82.931 133.127  85.410  0.00  0.00           C  
ATOM   3059  O   ASN   401      82.895 133.124  86.638  0.00  0.00           O  
ATOM   3060  CB  ASN   401      80.483 134.175  85.280  0.00  0.00           C  
ATOM   3061  CG  ASN   401      79.672 135.154  84.473  0.00  0.00           C  
ATOM   3062  ND2 ASN   401      78.492 135.413  84.938  0.00  0.00           N  
ATOM   3063  OD1 ASN   401      79.976 135.640  83.376  0.00  0.00           O  
ATOM   3064  N   GLY   402      83.976 132.532  84.824  0.00  0.00           N  
ATOM   3065  CA  GLY   402      85.166 131.929  85.415  0.00  0.00           C  
ATOM   3066  C   GLY   402      84.749 130.743  86.343  0.00  0.00           C  
ATOM   3067  O   GLY   402      85.485 130.500  87.267  0.00  0.00           O  
ATOM   3068  N   VAL   403      83.545 130.131  86.266  0.00  0.00           N  
ATOM   3069  CA  VAL   403      83.299 128.745  86.578  0.00  0.00           C  
ATOM   3070  C   VAL   403      83.330 128.041  85.208  0.00  0.00           C  
ATOM   3071  O   VAL   403      82.738 128.481  84.240  0.00  0.00           O  
ATOM   3072  CB  VAL   403      81.940 128.446  87.352  0.00  0.00           C  
ATOM   3073  CG1 VAL   403      81.704 126.950  87.491  0.00  0.00           C  
ATOM   3074  CG2 VAL   403      81.998 129.101  88.722  0.00  0.00           C  
ATOM   3075  N   VAL   404      84.024 126.885  85.171  0.00  0.00           N  
ATOM   3076  CA  VAL   404      83.851 125.936  84.077  0.00  0.00           C  
ATOM   3077  C   VAL   404      82.753 124.970  84.530  0.00  0.00           C  
ATOM   3078  O   VAL   404      82.780 124.600  85.725  0.00  0.00           O  
ATOM   3079  CB  VAL   404      85.215 125.200  83.790  0.00  0.00           C  
ATOM   3080  CG1 VAL   404      85.101 124.035  82.878  0.00  0.00           C  
ATOM   3081  CG2 VAL   404      86.241 126.241  83.258  0.00  0.00           C  
ATOM   3082  N   THR   405      81.906 124.558  83.609  0.00  0.00           N  
ATOM   3083  CA  THR   405      80.731 123.707  83.720  0.00  0.00           C  
ATOM   3084  C   THR   405      80.688 122.688  82.602  0.00  0.00           C  
ATOM   3085  O   THR   405      81.234 122.984  81.504  0.00  0.00           O  
ATOM   3086  CB  THR   405      79.330 124.440  83.759  0.00  0.00           C  
ATOM   3087  CG2 THR   405      79.420 125.811  84.542  0.00  0.00           C  
ATOM   3088  OG1 THR   405      78.934 124.923  82.530  0.00  0.00           O  
ATOM   3089  N   ALA   406      80.124 121.487  82.885  0.00  0.00           N  
ATOM   3090  CA  ALA   406      80.190 120.405  81.952  0.00  0.00           C  
ATOM   3091  C   ALA   406      78.804 119.737  82.066  0.00  0.00           C  
ATOM   3092  O   ALA   406      78.255 119.641  83.128  0.00  0.00           O  
ATOM   3093  CB  ALA   406      81.237 119.358  82.425  0.00  0.00           C  
ATOM   3094  N   THR   407      78.321 119.216  80.956  0.00  0.00           N  
ATOM   3095  CA  THR   407      76.954 118.736  80.772  0.00  0.00           C  
ATOM   3096  C   THR   407      76.844 117.485  79.957  0.00  0.00           C  
ATOM   3097  O   THR   407      77.590 117.328  79.014  0.00  0.00           O  
ATOM   3098  CB  THR   407      75.938 119.868  80.445  0.00  0.00           C  
ATOM   3099  CG2 THR   407      74.570 119.457  81.031  0.00  0.00           C  
ATOM   3100  OG1 THR   407      76.332 121.085  81.096  0.00  0.00           O  
ATOM   3101  N   MET   408      76.021 116.485  80.378  0.00  0.00           N  
ATOM   3102  CA  MET   408      76.166 115.106  79.840  0.00  0.00           C  
ATOM   3103  C   MET   408      75.148 114.768  78.652  0.00  0.00           C  
ATOM   3104  O   MET   408      74.189 115.511  78.523  0.00  0.00           O  
ATOM   3105  CB  MET   408      76.275 114.049  80.945  0.00  0.00           C  
ATOM   3106  CG  MET   408      77.417 114.379  81.996  0.00  0.00           C  
ATOM   3107  SD  MET   408      79.073 114.109  81.371  0.00  0.00           S  
ATOM   3108  CE  MET   408      79.174 112.276  81.383  0.00  0.00           C  
ATOM   3109  N   LEU   409      75.267 113.675  77.931  0.00  0.00           N  
ATOM   3110  CA  LEU   409      74.276 113.172  77.072  0.00  0.00           C  
ATOM   3111  C   LEU   409      73.046 112.604  77.866  0.00  0.00           C  
ATOM   3112  O   LEU   409      73.121 112.165  79.008  0.00  0.00           O  
ATOM   3113  CB  LEU   409      74.831 112.149  76.073  0.00  0.00           C  
ATOM   3114  CG  LEU   409      75.879 112.651  75.002  0.00  0.00           C  
ATOM   3115  CD1 LEU   409      76.631 111.557  74.241  0.00  0.00           C  
ATOM   3116  CD2 LEU   409      75.187 113.421  73.792  0.00  0.00           C  
ATOM   3117  N   SER   410      71.859 112.559  77.182  0.00  0.00           N  
ATOM   3118  CA  SER   410      70.603 112.051  77.801  0.00  0.00           C  
ATOM   3119  C   SER   410      70.304 110.576  77.830  0.00  0.00           C  
ATOM   3120  O   SER   410      69.312 110.125  78.500  0.00  0.00           O  
ATOM   3121  CB  SER   410      69.355 112.783  77.170  0.00  0.00           C  
ATOM   3122  OG  SER   410      69.057 112.403  75.859  0.00  0.00           O  
ATOM   3123  N   SER   411      71.219 109.810  77.311  0.00  0.00           N  
ATOM   3124  CA  SER   411      70.889 108.361  77.123  0.00  0.00           C  
ATOM   3125  C   SER   411      72.163 107.548  77.230  0.00  0.00           C  
ATOM   3126  O   SER   411      73.281 108.065  76.989  0.00  0.00           O  
ATOM   3127  CB  SER   411      70.202 108.101  75.761  0.00  0.00           C  
ATOM   3128  OG  SER   411      69.998 106.658  75.580  0.00  0.00           O  
ATOM   3129  N   GLY   412      72.129 106.307  77.674  0.00  0.00           N  
ATOM   3130  CA  GLY   412      73.270 105.436  77.932  0.00  0.00           C  
ATOM   3131  C   GLY   412      74.231 105.820  79.117  0.00  0.00           C  
ATOM   3132  O   GLY   412      75.056 105.059  79.589  0.00  0.00           O  
ATOM   3133  N   VAL   413      74.197 107.033  79.589  0.00  0.00           N  
ATOM   3134  CA  VAL   413      74.897 107.667  80.705  0.00  0.00           C  
ATOM   3135  C   VAL   413      74.492 107.353  82.135  0.00  0.00           C  
ATOM   3136  O   VAL   413      73.963 108.191  82.935  0.00  0.00           O  
ATOM   3137  CB  VAL   413      74.950 109.157  80.530  0.00  0.00           C  
ATOM   3138  CG1 VAL   413      76.067 109.795  81.305  0.00  0.00           C  
ATOM   3139  CG2 VAL   413      75.038 109.650  79.075  0.00  0.00           C  
ATOM   3140  N   ASN   414      74.685 106.059  82.482  0.00  0.00           N  
ATOM   3141  CA  ASN   414      74.119 105.444  83.694  0.00  0.00           C  
ATOM   3142  C   ASN   414      72.608 105.656  83.731  0.00  0.00           C  
ATOM   3143  O   ASN   414      71.937 105.993  82.753  0.00  0.00           O  
ATOM   3144  CB  ASN   414      74.767 106.082  84.974  0.00  0.00           C  
ATOM   3145  CG  ASN   414      74.828 105.228  86.264  0.00  0.00           C  
ATOM   3146  ND2 ASN   414      75.963 104.685  86.625  0.00  0.00           N  
ATOM   3147  OD1 ASN   414      73.873 105.190  86.990  0.00  0.00           O  
ATOM   3148  N   ASN   415      72.011 105.092  84.822  0.00  0.00           N  
ATOM   3149  CA  ASN   415      70.550 105.118  85.021  0.00  0.00           C  
ATOM   3150  C   ASN   415      70.025 106.472  85.644  0.00  0.00           C  
ATOM   3151  O   ASN   415      68.869 106.869  85.533  0.00  0.00           O  
ATOM   3152  CB  ASN   415      70.294 103.888  85.924  0.00  0.00           C  
ATOM   3153  CG  ASN   415      68.841 103.349  85.839  0.00  0.00           C  
ATOM   3154  ND2 ASN   415      68.507 102.382  86.683  0.00  0.00           N  
ATOM   3155  OD1 ASN   415      68.089 103.597  84.930  0.00  0.00           O  
ATOM   3156  N   GLU   416      70.953 107.102  86.363  0.00  0.00           N  
ATOM   3157  CA  GLU   416      70.704 108.110  87.402  0.00  0.00           C  
ATOM   3158  C   GLU   416      71.641 109.382  87.373  0.00  0.00           C  
ATOM   3159  O   GLU   416      71.528 110.278  88.261  0.00  0.00           O  
ATOM   3160  CB  GLU   416      70.805 107.454  88.801  0.00  0.00           C  
ATOM   3161  CG  GLU   416      69.438 106.814  89.157  0.00  0.00           C  
ATOM   3162  CD  GLU   416      69.397 105.921  90.407  0.00  0.00           C  
ATOM   3163  OE1 GLU   416      70.511 105.738  90.961  0.00  0.00           O  
ATOM   3164  OE2 GLU   416      68.346 105.395  90.820  0.00  0.00           O1-
ATOM   3165  N   ILE   417      72.410 109.556  86.292  0.00  0.00           N  
ATOM   3166  CA  ILE   417      73.079 110.882  85.947  0.00  0.00           C  
ATOM   3167  C   ILE   417      72.798 111.406  84.491  0.00  0.00           C  
ATOM   3168  O   ILE   417      73.504 112.233  83.933  0.00  0.00           O  
ATOM   3169  CB  ILE   417      74.581 110.792  86.301  0.00  0.00           C  
ATOM   3170  CG1 ILE   417      75.481 109.992  85.236  0.00  0.00           C  
ATOM   3171  CG2 ILE   417      74.969 110.096  87.645  0.00  0.00           C  
ATOM   3172  CD1 ILE   417      76.959 110.403  85.173  0.00  0.00           C  
ATOM   3173  N   LYS   418      71.740 110.885  83.848  0.00  0.00           N  
ATOM   3174  CA  LYS   418      71.371 111.236  82.505  0.00  0.00           C  
ATOM   3175  C   LYS   418      71.119 112.797  82.288  0.00  0.00           C  
ATOM   3176  O   LYS   418      70.236 113.354  82.938  0.00  0.00           O  
ATOM   3177  CB  LYS   418      70.087 110.378  82.214  0.00  0.00           C  
ATOM   3178  CG  LYS   418      70.096 108.834  82.444  0.00  0.00           C  
ATOM   3179  CD  LYS   418      68.764 108.217  82.125  0.00  0.00           C  
ATOM   3180  CE  LYS   418      67.688 108.546  83.127  0.00  0.00           C  
ATOM   3181  NZ  LYS   418      66.404 107.834  83.054  0.00  0.00           N1+
ATOM   3182  N   GLY   419      71.953 113.313  81.359  0.00  0.00           N  
ATOM   3183  CA  GLY   419      72.027 114.769  81.067  0.00  0.00           C  
ATOM   3184  C   GLY   419      72.357 115.740  82.199  0.00  0.00           C  
ATOM   3185  O   GLY   419      72.001 116.904  82.110  0.00  0.00           O  
ATOM   3186  N   LYS   420      73.064 115.281  83.242  0.00  0.00           N  
ATOM   3187  CA  LYS   420      73.254 116.160  84.448  0.00  0.00           C  
ATOM   3188  C   LYS   420      74.495 117.021  84.170  0.00  0.00           C  
ATOM   3189  O   LYS   420      75.284 116.842  83.215  0.00  0.00           O  
ATOM   3190  CB  LYS   420      73.340 115.217  85.699  0.00  0.00           C  
ATOM   3191  CG  LYS   420      72.017 114.356  85.959  0.00  0.00           C  
ATOM   3192  CD  LYS   420      70.684 115.127  86.165  0.00  0.00           C  
ATOM   3193  CE  LYS   420      69.628 114.067  86.316  0.00  0.00           C  
ATOM   3194  NZ  LYS   420      68.348 114.778  86.692  0.00  0.00           N1+
ATOM   3195  N   LYS   421      74.744 117.971  85.068  0.00  0.00           N  
ATOM   3196  CA  LYS   421      75.919 118.877  85.130  0.00  0.00           C  
ATOM   3197  C   LYS   421      76.835 118.603  86.332  0.00  0.00           C  
ATOM   3198  O   LYS   421      76.381 117.993  87.334  0.00  0.00           O  
ATOM   3199  CB  LYS   421      75.438 120.294  84.931  0.00  0.00           C  
ATOM   3200  CG  LYS   421      74.704 120.791  86.143  0.00  0.00           C  
ATOM   3201  CD  LYS   421      73.549 121.729  86.119  0.00  0.00           C  
ATOM   3202  CE  LYS   421      73.010 121.960  87.511  0.00  0.00           C  
ATOM   3203  NZ  LYS   421      71.826 122.823  87.540  0.00  0.00           N1+
ATOM   3204  N   LEU   422      78.097 118.982  86.178  0.00  0.00           N  
ATOM   3205  CA  LEU   422      79.191 119.104  87.137  0.00  0.00           C  
ATOM   3206  C   LEU   422      79.763 120.533  87.053  0.00  0.00           C  
ATOM   3207  O   LEU   422      79.361 121.199  86.086  0.00  0.00           O  
ATOM   3208  CB  LEU   422      80.363 118.140  86.660  0.00  0.00           C  
ATOM   3209  CG  LEU   422      79.998 116.729  87.163  0.00  0.00           C  
ATOM   3210  CD1 LEU   422      80.688 115.674  86.310  0.00  0.00           C  
ATOM   3211  CD2 LEU   422      80.391 116.578  88.694  0.00  0.00           C  
ATOM   3212  N   SER   423      80.724 120.858  87.903  0.00  0.00           N  
ATOM   3213  CA  SER   423      81.530 121.997  87.675  0.00  0.00           C  
ATOM   3214  C   SER   423      82.944 121.900  88.276  0.00  0.00           C  
ATOM   3215  O   SER   423      83.281 120.866  88.924  0.00  0.00           O  
ATOM   3216  CB  SER   423      80.757 123.263  88.208  0.00  0.00           C  
ATOM   3217  OG  SER   423      80.763 123.532  89.587  0.00  0.00           O  
ATOM   3218  N   LEU   424      83.701 122.955  87.920  0.00  0.00           N  
ATOM   3219  CA  LEU   424      85.183 123.178  88.208  0.00  0.00           C  
ATOM   3220  C   LEU   424      85.403 124.704  88.352  0.00  0.00           C  
ATOM   3221  O   LEU   424      85.145 125.391  87.374  0.00  0.00           O  
ATOM   3222  CB  LEU   424      85.987 122.453  87.162  0.00  0.00           C  
ATOM   3223  CG  LEU   424      87.524 122.654  87.262  0.00  0.00           C  
ATOM   3224  CD1 LEU   424      88.277 121.337  86.962  0.00  0.00           C  
ATOM   3225  CD2 LEU   424      88.075 123.606  86.127  0.00  0.00           C  
ATOM   3226  N   TRP   425      85.881 125.136  89.534  0.00  0.00           N  
ATOM   3227  CA  TRP   425      85.808 126.599  89.780  0.00  0.00           C  
ATOM   3228  C   TRP   425      87.085 127.011  90.532  0.00  0.00           C  
ATOM   3229  O   TRP   425      87.795 126.186  91.141  0.00  0.00           O  
ATOM   3230  CB  TRP   425      84.561 126.917  90.616  0.00  0.00           C  
ATOM   3231  CG  TRP   425      84.513 126.371  91.948  0.00  0.00           C  
ATOM   3232  CD1 TRP   425      85.121 126.774  93.095  0.00  0.00           C  
ATOM   3233  CD2 TRP   425      83.981 125.061  92.308  0.00  0.00           C  
ATOM   3234  CE2 TRP   425      84.265 124.767  93.678  0.00  0.00           C  
ATOM   3235  CE3 TRP   425      83.393 123.972  91.501  0.00  0.00           C  
ATOM   3236  NE1 TRP   425      84.923 125.874  94.143  0.00  0.00           N  
ATOM   3237  CZ2 TRP   425      83.987 123.488  94.200  0.00  0.00           C  
ATOM   3238  CZ3 TRP   425      83.009 122.767  92.101  0.00  0.00           C  
ATOM   3239  CH2 TRP   425      83.311 122.514  93.432  0.00  0.00           C  
ATOM   3240  N   ALA   426      87.392 128.345  90.504  0.00  0.00           N  
ATOM   3241  CA  ALA   426      88.689 128.866  90.828  0.00  0.00           C  
ATOM   3242  C   ALA   426      88.700 129.879  92.023  0.00  0.00           C  
ATOM   3243  O   ALA   426      87.718 130.600  92.213  0.00  0.00           O  
ATOM   3244  CB  ALA   426      89.234 129.451  89.575  0.00  0.00           C  
ATOM   3245  N   ARG   427      89.780 129.871  92.752  0.00  0.00           N  
ATOM   3246  CA  ARG   427      90.056 130.532  93.990  0.00  0.00           C  
ATOM   3247  C   ARG   427      91.438 131.172  93.919  0.00  0.00           C  
ATOM   3248  O   ARG   427      92.330 130.550  93.389  0.00  0.00           O  
ATOM   3249  CB  ARG   427      90.132 129.541  95.191  0.00  0.00           C  
ATOM   3250  CG  ARG   427      88.816 129.000  95.784  0.00  0.00           C  
ATOM   3251  CD  ARG   427      88.121 130.063  96.687  0.00  0.00           C  
ATOM   3252  NE  ARG   427      86.958 129.524  97.496  0.00  0.00           N  
ATOM   3253  CZ  ARG   427      86.057 130.148  98.283  0.00  0.00           C  
ATOM   3254  NH1 ARG   427      86.107 131.404  98.514  0.00  0.00           N1+
ATOM   3255  NH2 ARG   427      84.972 129.490  98.784  0.00  0.00           N  
ATOM   3256  N   ARG   428      91.527 132.462  94.465  0.00  0.00           N  
ATOM   3257  CA  ARG   428      92.600 133.414  94.201  0.00  0.00           C  
ATOM   3258  C   ARG   428      93.780 133.142  95.106  0.00  0.00           C  
ATOM   3259  O   ARG   428      93.594 133.210  96.270  0.00  0.00           O  
ATOM   3260  CB  ARG   428      92.057 134.831  94.476  0.00  0.00           C  
ATOM   3261  CG  ARG   428      93.107 135.977  94.496  0.00  0.00           C  
ATOM   3262  CD  ARG   428      92.491 137.302  94.775  0.00  0.00           C  
ATOM   3263  NE  ARG   428      93.332 138.402  94.221  0.00  0.00           N  
ATOM   3264  CZ  ARG   428      92.970 139.268  93.261  0.00  0.00           C  
ATOM   3265  NH1 ARG   428      91.782 139.419  92.844  0.00  0.00           N1+
ATOM   3266  NH2 ARG   428      93.829 140.024  92.702  0.00  0.00           N  
ATOM   3267  N   GLU   429      94.949 132.979  94.505  0.00  0.00           N  
ATOM   3268  CA  GLU   429      96.204 132.925  95.211  0.00  0.00           C  
ATOM   3269  C   GLU   429      97.025 134.208  95.076  0.00  0.00           C  
ATOM   3270  O   GLU   429      97.787 134.462  95.954  0.00  0.00           O  
ATOM   3271  CB  GLU   429      97.028 131.711  94.848  0.00  0.00           C  
ATOM   3272  CG  GLU   429      96.263 130.391  94.920  0.00  0.00           C  
ATOM   3273  CD  GLU   429      96.354 129.888  96.303  0.00  0.00           C  
ATOM   3274  OE1 GLU   429      97.339 129.115  96.629  0.00  0.00           O  
ATOM   3275  OE2 GLU   429      95.545 130.402  97.153  0.00  0.00           O1-
ATOM   3276  N   ASN   430      96.829 134.997  94.002  0.00  0.00           N  
ATOM   3277  CA  ASN   430      97.789 135.968  93.447  0.00  0.00           C  
ATOM   3278  C   ASN   430      99.174 135.366  93.009  0.00  0.00           C  
ATOM   3279  O   ASN   430      99.767 134.461  93.631  0.00  0.00           O  
ATOM   3280  CB  ASN   430      98.029 137.194  94.425  0.00  0.00           C  
ATOM   3281  CG  ASN   430      96.769 137.890  94.871  0.00  0.00           C  
ATOM   3282  ND2 ASN   430      96.335 137.578  96.076  0.00  0.00           N  
ATOM   3283  OD1 ASN   430      96.128 138.695  94.231  0.00  0.00           O  
ATOM   3284  N   GLY   431      99.580 135.742  91.818  0.00  0.00           N  
ATOM   3285  CA  GLY   431     100.650 135.305  90.967  0.00  0.00           C  
ATOM   3286  C   GLY   431     100.547 133.850  90.442  0.00  0.00           C  
ATOM   3287  O   GLY   431     101.258 133.460  89.490  0.00  0.00           O  
ATOM   3288  N   SER   432      99.532 133.097  90.942  0.00  0.00           N  
ATOM   3289  CA  SER   432      98.829 131.873  90.519  0.00  0.00           C  
ATOM   3290  C   SER   432      97.332 131.826  90.942  0.00  0.00           C  
ATOM   3291  O   SER   432      96.888 132.730  91.664  0.00  0.00           O  
ATOM   3292  CB  SER   432      99.653 130.696  91.129  0.00  0.00           C  
ATOM   3293  OG  SER   432      99.160 129.393  90.818  0.00  0.00           O  
ATOM   3294  N   VAL   433      96.705 130.691  90.649  0.00  0.00           N  
ATOM   3295  CA  VAL   433      95.249 130.449  90.868  0.00  0.00           C  
ATOM   3296  C   VAL   433      95.036 129.007  91.369  0.00  0.00           C  
ATOM   3297  O   VAL   433      95.417 128.030  90.675  0.00  0.00           O  
ATOM   3298  CB  VAL   433      94.509 130.573  89.543  0.00  0.00           C  
ATOM   3299  CG1 VAL   433      93.016 130.277  89.689  0.00  0.00           C  
ATOM   3300  CG2 VAL   433      94.624 131.929  88.892  0.00  0.00           C  
ATOM   3301  N   LYS   434      94.429 128.726  92.508  0.00  0.00           N  
ATOM   3302  CA  LYS   434      93.911 127.381  92.848  0.00  0.00           C  
ATOM   3303  C   LYS   434      92.507 127.053  92.186  0.00  0.00           C  
ATOM   3304  O   LYS   434      91.614 127.911  91.964  0.00  0.00           O  
ATOM   3305  CB  LYS   434      93.888 127.209  94.376  0.00  0.00           C  
ATOM   3306  CG  LYS   434      93.594 125.832  94.920  0.00  0.00           C  
ATOM   3307  CD  LYS   434      93.763 125.805  96.426  0.00  0.00           C  
ATOM   3308  CE  LYS   434      95.247 125.573  96.815  0.00  0.00           C  
ATOM   3309  NZ  LYS   434      95.435 125.636  98.288  0.00  0.00           N1+
ATOM   3310  N   TRP   435      92.307 125.784  91.957  0.00  0.00           N  
ATOM   3311  CA  TRP   435      91.095 125.112  91.450  0.00  0.00           C  
ATOM   3312  C   TRP   435      90.453 124.024  92.253  0.00  0.00           C  
ATOM   3313  O   TRP   435      91.199 123.231  92.798  0.00  0.00           O  
ATOM   3314  CB  TRP   435      91.403 124.631  90.018  0.00  0.00           C  
ATOM   3315  CG  TRP   435      91.436 125.755  89.021  0.00  0.00           C  
ATOM   3316  CD1 TRP   435      92.603 126.424  88.757  0.00  0.00           C  
ATOM   3317  CD2 TRP   435      90.411 126.419  88.235  0.00  0.00           C  
ATOM   3318  CE2 TRP   435      91.075 127.424  87.389  0.00  0.00           C  
ATOM   3319  CE3 TRP   435      89.054 126.129  87.922  0.00  0.00           C  
ATOM   3320  NE1 TRP   435      92.328 127.427  87.850  0.00  0.00           N  
ATOM   3321  CZ2 TRP   435      90.433 128.208  86.411  0.00  0.00           C  
ATOM   3322  CZ3 TRP   435      88.400 126.908  86.986  0.00  0.00           C  
ATOM   3323  CH2 TRP   435      89.069 127.939  86.208  0.00  0.00           C  
ATOM   3324  N   PHE   436      89.110 123.838  92.178  0.00  0.00           N  
ATOM   3325  CA  PHE   436      88.329 122.795  92.857  0.00  0.00           C  
ATOM   3326  C   PHE   436      87.226 122.213  91.960  0.00  0.00           C  
ATOM   3327  O   PHE   436      86.663 122.949  91.135  0.00  0.00           O  
ATOM   3328  CB  PHE   436      87.640 123.269  94.205  0.00  0.00           C  
ATOM   3329  CG  PHE   436      88.634 123.734  95.283  0.00  0.00           C  
ATOM   3330  CD1 PHE   436      89.104 125.048  95.278  0.00  0.00           C  
ATOM   3331  CD2 PHE   436      88.986 122.878  96.348  0.00  0.00           C  
ATOM   3332  CE1 PHE   436      89.992 125.455  96.240  0.00  0.00           C  
ATOM   3333  CE2 PHE   436      89.810 123.304  97.403  0.00  0.00           C  
ATOM   3334  CZ  PHE   436      90.270 124.607  97.341  0.00  0.00           C  
ATOM   3335  N   CYS   437      86.856 120.964  92.032  0.00  0.00           N  
ATOM   3336  CA  CYS   437      85.845 120.349  91.185  0.00  0.00           C  
ATOM   3337  C   CYS   437      84.967 119.301  91.799  0.00  0.00           C  
ATOM   3338  O   CYS   437      85.284 118.681  92.769  0.00  0.00           O  
ATOM   3339  CB  CYS   437      86.551 119.824  89.912  0.00  0.00           C  
ATOM   3340  SG  CYS   437      87.518 118.332  90.256  0.00  0.00           S  
ATOM   3341  N   GLY   438      83.752 119.200  91.230  0.00  0.00           N  
ATOM   3342  CA  GLY   438      82.707 118.467  91.886  0.00  0.00           C  
ATOM   3343  C   GLY   438      81.260 118.964  91.500  0.00  0.00           C  
ATOM   3344  O   GLY   438      80.986 119.225  90.336  0.00  0.00           O  
ATOM   3345  N   GLN   439      80.391 119.078  92.496  0.00  0.00           N  
ATOM   3346  CA  GLN   439      78.984 119.574  92.342  0.00  0.00           C  
ATOM   3347  C   GLN   439      78.836 121.037  91.805  0.00  0.00           C  
ATOM   3348  O   GLN   439      79.694 121.861  92.056  0.00  0.00           O  
ATOM   3349  CB  GLN   439      78.090 119.357  93.592  0.00  0.00           C  
ATOM   3350  CG  GLN   439      77.703 117.894  93.858  0.00  0.00           C  
ATOM   3351  CD  GLN   439      76.512 117.760  94.708  0.00  0.00           C  
ATOM   3352  NE2 GLN   439      75.623 116.754  94.572  0.00  0.00           N  
ATOM   3353  OE1 GLN   439      76.204 118.520  95.627  0.00  0.00           O  
ATOM   3354  N   PRO   440      77.742 121.297  91.035  0.00  0.00           N  
ATOM   3355  CA  PRO   440      77.483 122.517  90.295  0.00  0.00           C  
ATOM   3356  C   PRO   440      77.572 123.728  91.154  0.00  0.00           C  
ATOM   3357  O   PRO   440      76.954 123.824  92.215  0.00  0.00           O  
ATOM   3358  CB  PRO   440      76.162 122.332  89.506  0.00  0.00           C  
ATOM   3359  CG  PRO   440      76.176 120.851  89.202  0.00  0.00           C  
ATOM   3360  CD  PRO   440      76.799 120.376  90.517  0.00  0.00           C  
ATOM   3361  N   VAL   441      78.229 124.758  90.612  0.00  0.00           N  
ATOM   3362  CA  VAL   441      78.366 126.110  91.209  0.00  0.00           C  
ATOM   3363  C   VAL   441      78.342 127.291  90.151  0.00  0.00           C  
ATOM   3364  O   VAL   441      78.558 127.130  88.899  0.00  0.00           O  
ATOM   3365  CB  VAL   441      79.605 126.221  92.172  0.00  0.00           C  
ATOM   3366  CG1 VAL   441      80.070 124.936  92.844  0.00  0.00           C  
ATOM   3367  CG2 VAL   441      80.878 126.915  91.448  0.00  0.00           C  
ATOM   3368  N   THR   442      78.051 128.464  90.707  0.00  0.00           N  
ATOM   3369  CA  THR   442      78.214 129.753  89.988  0.00  0.00           C  
ATOM   3370  C   THR   442      79.023 130.868  90.722  0.00  0.00           C  
ATOM   3371  O   THR   442      79.008 130.938  91.965  0.00  0.00           O  
ATOM   3372  CB  THR   442      76.855 130.321  89.617  0.00  0.00           C  
ATOM   3373  CG2 THR   442      76.018 129.360  88.711  0.00  0.00           C  
ATOM   3374  OG1 THR   442      76.056 130.793  90.672  0.00  0.00           O  
ATOM   3375  N   ARG   443      79.616 131.776  89.927  0.00  0.00           N  
ATOM   3376  CA  ARG   443      80.504 132.903  90.417  0.00  0.00           C  
ATOM   3377  C   ARG   443      79.706 134.010  90.996  0.00  0.00           C  
ATOM   3378  O   ARG   443      78.806 134.591  90.348  0.00  0.00           O  
ATOM   3379  CB  ARG   443      81.373 133.343  89.286  0.00  0.00           C  
ATOM   3380  CG  ARG   443      82.267 134.552  89.501  0.00  0.00           C  
ATOM   3381  CD  ARG   443      83.348 134.115  90.490  0.00  0.00           C  
ATOM   3382  NE  ARG   443      84.279 133.131  89.997  0.00  0.00           N  
ATOM   3383  CZ  ARG   443      85.222 132.479  90.711  0.00  0.00           C  
ATOM   3384  NH1 ARG   443      85.503 132.861  91.905  0.00  0.00           N1+
ATOM   3385  NH2 ARG   443      85.973 131.551  90.185  0.00  0.00           N  
ATOM   3386  N   THR   444      80.052 134.364  92.185  0.00  0.00           N  
ATOM   3387  CA  THR   444      79.521 135.489  92.909  0.00  0.00           C  
ATOM   3388  C   THR   444      80.401 136.717  92.965  0.00  0.00           C  
ATOM   3389  O   THR   444      80.016 137.849  92.526  0.00  0.00           O  
ATOM   3390  CB  THR   444      79.129 135.189  94.358  0.00  0.00           C  
ATOM   3391  CG2 THR   444      78.042 136.106  94.905  0.00  0.00           C  
ATOM   3392  OG1 THR   444      78.704 133.867  94.505  0.00  0.00           O  
ATOM   3393  N   ASP   445      81.751 136.581  93.137  0.00  0.00           N  
ATOM   3394  CA  ASP   445      82.700 137.714  93.156  0.00  0.00           C  
ATOM   3395  C   ASP   445      84.142 137.140  92.877  0.00  0.00           C  
ATOM   3396  O   ASP   445      84.300 135.920  92.770  0.00  0.00           O  
ATOM   3397  CB  ASP   445      82.763 138.420  94.528  0.00  0.00           C  
ATOM   3398  CG  ASP   445      83.316 137.731  95.802  0.00  0.00           C  
ATOM   3399  OD1 ASP   445      84.256 136.956  95.684  0.00  0.00           O  
ATOM   3400  OD2 ASP   445      82.831 138.080  96.894  0.00  0.00           O1-
ATOM   3401  N   ASP   446      85.152 137.963  92.589  0.00  0.00           N  
ATOM   3402  CA  ASP   446      86.506 137.669  92.092  0.00  0.00           C  
ATOM   3403  C   ASP   446      87.234 136.473  92.709  0.00  0.00           C  
ATOM   3404  O   ASP   446      88.212 136.038  92.057  0.00  0.00           O  
ATOM   3405  CB  ASP   446      87.346 138.889  92.248  0.00  0.00           C  
ATOM   3406  CG  ASP   446      86.953 140.047  91.288  0.00  0.00           C  
ATOM   3407  OD1 ASP   446      85.944 139.958  90.527  0.00  0.00           O  
ATOM   3408  OD2 ASP   446      87.729 141.047  91.235  0.00  0.00           O1-
ATOM   3409  N   ASP   447      86.725 135.820  93.801  0.00  0.00           N  
ATOM   3410  CA  ASP   447      87.107 134.523  94.367  0.00  0.00           C  
ATOM   3411  C   ASP   447      85.913 133.683  94.808  0.00  0.00           C  
ATOM   3412  O   ASP   447      85.988 132.472  94.649  0.00  0.00           O  
ATOM   3413  CB  ASP   447      88.293 134.703  95.405  0.00  0.00           C  
ATOM   3414  CG  ASP   447      88.437 133.523  96.248  0.00  0.00           C  
ATOM   3415  OD1 ASP   447      89.455 132.823  96.129  0.00  0.00           O  
ATOM   3416  OD2 ASP   447      87.640 133.292  97.196  0.00  0.00           O1-
ATOM   3417  N   THR   448      84.849 134.257  95.421  0.00  0.00           N  
ATOM   3418  CA  THR   448      83.651 133.599  95.951  0.00  0.00           C  
ATOM   3419  C   THR   448      82.553 133.097  94.960  0.00  0.00           C  
ATOM   3420  O   THR   448      82.362 133.668  93.906  0.00  0.00           O  
ATOM   3421  CB  THR   448      82.983 134.478  97.060  0.00  0.00           C  
ATOM   3422  CG2 THR   448      82.475 133.759  98.316  0.00  0.00           C  
ATOM   3423  OG1 THR   448      83.998 135.301  97.657  0.00  0.00           O  
ATOM   3424  N   VAL   449      81.833 132.088  95.396  0.00  0.00           N  
ATOM   3425  CA  VAL   449      81.019 131.159  94.467  0.00  0.00           C  
ATOM   3426  C   VAL   449      79.910 130.508  95.350  0.00  0.00           C  
ATOM   3427  O   VAL   449      79.895 130.598  96.568  0.00  0.00           O  
ATOM   3428  CB  VAL   449      81.906 130.054  93.965  0.00  0.00           C  
ATOM   3429  CG1 VAL   449      82.708 130.413  92.693  0.00  0.00           C  
ATOM   3430  CG2 VAL   449      82.945 129.566  94.990  0.00  0.00           C  
ATOM   3431  N   ALA   450      78.814 130.179  94.677  0.00  0.00           N  
ATOM   3432  CA  ALA   450      77.535 129.672  95.327  0.00  0.00           C  
ATOM   3433  C   ALA   450      76.866 128.473  94.624  0.00  0.00           C  
ATOM   3434  O   ALA   450      77.200 128.038  93.516  0.00  0.00           O  
ATOM   3435  CB  ALA   450      76.681 130.958  95.515  0.00  0.00           C  
ATOM   3436  N   ASP   451      75.956 127.849  95.361  0.00  0.00           N  
ATOM   3437  CA  ASP   451      75.134 126.724  94.910  0.00  0.00           C  
ATOM   3438  C   ASP   451      74.395 126.888  93.563  0.00  0.00           C  
ATOM   3439  O   ASP   451      73.877 127.945  93.260  0.00  0.00           O  
ATOM   3440  CB  ASP   451      74.114 126.416  95.972  0.00  0.00           C  
ATOM   3441  CG  ASP   451      73.325 125.118  95.679  0.00  0.00           C  
ATOM   3442  OD1 ASP   451      73.886 124.191  95.099  0.00  0.00           O  
ATOM   3443  OD2 ASP   451      72.153 125.042  96.043  0.00  0.00           O1-
ATOM   3444  N   ALA   452      74.257 125.828  92.776  0.00  0.00           N  
ATOM   3445  CA  ALA   452      73.638 125.708  91.504  0.00  0.00           C  
ATOM   3446  C   ALA   452      72.695 124.547  91.392  0.00  0.00           C  
ATOM   3447  O   ALA   452      72.441 123.976  90.313  0.00  0.00           O  
ATOM   3448  CB  ALA   452      74.653 125.772  90.393  0.00  0.00           C  
ATOM   3449  N   LYS   453      72.206 123.984  92.550  0.00  0.00           N  
ATOM   3450  CA  LYS   453      71.246 122.855  92.723  0.00  0.00           C  
ATOM   3451  C   LYS   453      69.799 123.143  92.322  0.00  0.00           C  
ATOM   3452  O   LYS   453      69.221 124.077  92.797  0.00  0.00           O  
ATOM   3453  CB  LYS   453      71.355 122.338  94.160  0.00  0.00           C  
ATOM   3454  CG  LYS   453      70.352 121.259  94.446  0.00  0.00           C  
ATOM   3455  CD  LYS   453      70.432 120.629  95.794  0.00  0.00           C  
ATOM   3456  CE  LYS   453      69.413 119.553  96.009  0.00  0.00           C  
ATOM   3457  NZ  LYS   453      69.641 118.207  95.341  0.00  0.00           N1+
ATOM   3458  N   ASP   454      69.186 122.317  91.425  0.00  0.00           N  
ATOM   3459  CA  ASP   454      67.809 122.515  90.954  0.00  0.00           C  
ATOM   3460  C   ASP   454      67.054 121.217  90.587  0.00  0.00           C  
ATOM   3461  O   ASP   454      65.845 121.217  90.381  0.00  0.00           O  
ATOM   3462  CB  ASP   454      67.848 123.512  89.734  0.00  0.00           C  
ATOM   3463  CG  ASP   454      68.788 123.160  88.588  0.00  0.00           C  
ATOM   3464  OD1 ASP   454      69.258 122.036  88.403  0.00  0.00           O  
ATOM   3465  OD2 ASP   454      68.981 124.013  87.718  0.00  0.00           O1-
ATOM   3466  N   GLY   455      67.830 120.168  90.379  0.00  0.00           N  
ATOM   3467  CA  GLY   455      67.390 118.807  90.012  0.00  0.00           C  
ATOM   3468  C   GLY   455      68.112 118.269  88.795  0.00  0.00           C  
ATOM   3469  O   GLY   455      67.996 117.132  88.362  0.00  0.00           O  
ATOM   3470  N   LYS   456      69.031 119.078  88.244  0.00  0.00           N  
ATOM   3471  CA  LYS   456      69.942 118.807  87.125  0.00  0.00           C  
ATOM   3472  C   LYS   456      71.353 118.416  87.419  0.00  0.00           C  
ATOM   3473  O   LYS   456      72.089 118.190  86.474  0.00  0.00           O  
ATOM   3474  CB  LYS   456      69.903 119.897  86.036  0.00  0.00           C  
ATOM   3475  CG  LYS   456      68.475 120.289  85.633  0.00  0.00           C  
ATOM   3476  CD  LYS   456      68.620 121.493  84.692  0.00  0.00           C  
ATOM   3477  CE  LYS   456      67.395 122.402  84.302  0.00  0.00           C  
ATOM   3478  NZ  LYS   456      66.721 123.039  85.489  0.00  0.00           N1+
ATOM   3479  N   GLU   457      71.714 118.460  88.726  0.00  0.00           N  
ATOM   3480  CA  GLU   457      73.002 118.131  89.329  0.00  0.00           C  
ATOM   3481  C   GLU   457      73.147 116.617  89.495  0.00  0.00           C  
ATOM   3482  O   GLU   457      72.300 115.897  90.031  0.00  0.00           O  
ATOM   3483  CB  GLU   457      73.342 118.949  90.589  0.00  0.00           C  
ATOM   3484  CG  GLU   457      72.610 118.539  91.872  0.00  0.00           C  
ATOM   3485  CD  GLU   457      71.027 118.796  91.783  0.00  0.00           C  
ATOM   3486  OE1 GLU   457      70.630 119.646  90.958  0.00  0.00           O  
ATOM   3487  OE2 GLU   457      70.140 118.281  92.576  0.00  0.00           O1-
ATOM   3488  N   ILE   458      74.373 116.105  89.203  0.00  0.00           N  
ATOM   3489  CA  ILE   458      74.870 114.736  89.664  0.00  0.00           C  
ATOM   3490  C   ILE   458      74.910 114.769  91.210  0.00  0.00           C  
ATOM   3491  O   ILE   458      75.247 115.770  91.827  0.00  0.00           O  
ATOM   3492  CB  ILE   458      76.304 114.366  89.094  0.00  0.00           C  
ATOM   3493  CG1 ILE   458      76.321 114.594  87.530  0.00  0.00           C  
ATOM   3494  CG2 ILE   458      76.538 112.914  89.565  0.00  0.00           C  
ATOM   3495  CD1 ILE   458      77.619 114.048  86.817  0.00  0.00           C  
ATOM   3496  N   ASP   459      74.510 113.620  91.756  0.00  0.00           N  
ATOM   3497  CA  ASP   459      74.609 113.283  93.190  0.00  0.00           C  
ATOM   3498  C   ASP   459      75.938 112.589  93.544  0.00  0.00           C  
ATOM   3499  O   ASP   459      76.463 111.710  92.829  0.00  0.00           O  
ATOM   3500  CB  ASP   459      73.329 112.392  93.413  0.00  0.00           C  
ATOM   3501  CG  ASP   459      72.987 112.009  94.830  0.00  0.00           C  
ATOM   3502  OD1 ASP   459      72.004 111.300  94.983  0.00  0.00           O  
ATOM   3503  OD2 ASP   459      73.691 112.469  95.763  0.00  0.00           O1-
ATOM   3504  N   THR   460      76.536 112.929  94.714  0.00  0.00           N  
ATOM   3505  CA  THR   460      77.893 112.473  95.090  0.00  0.00           C  
ATOM   3506  C   THR   460      78.215 110.950  95.163  0.00  0.00           C  
ATOM   3507  O   THR   460      79.402 110.608  95.097  0.00  0.00           O  
ATOM   3508  CB  THR   460      78.500 113.254  96.274  0.00  0.00           C  
ATOM   3509  CG2 THR   460      78.097 114.698  96.322  0.00  0.00           C  
ATOM   3510  OG1 THR   460      78.002 112.603  97.388  0.00  0.00           O  
ATOM   3511  N   LYS   461      77.193 110.065  95.190  0.00  0.00           N  
ATOM   3512  CA  LYS   461      77.485 108.606  95.090  0.00  0.00           C  
ATOM   3513  C   LYS   461      78.149 108.162  93.758  0.00  0.00           C  
ATOM   3514  O   LYS   461      78.538 107.025  93.625  0.00  0.00           O  
ATOM   3515  CB  LYS   461      76.103 107.852  95.256  0.00  0.00           C  
ATOM   3516  CG  LYS   461      75.138 107.887  94.008  0.00  0.00           C  
ATOM   3517  CD  LYS   461      74.289 106.600  93.990  0.00  0.00           C  
ATOM   3518  CE  LYS   461      75.172 105.367  93.655  0.00  0.00           C  
ATOM   3519  NZ  LYS   461      74.356 104.179  93.541  0.00  0.00           N1+
ATOM   3520  N   HIE   462      78.074 109.021  92.725  0.00  0.00           N  
ATOM   3521  CA  HIE   462      78.446 108.685  91.278  0.00  0.00           C  
ATOM   3522  C   HIE   462      79.896 109.067  90.954  0.00  0.00           C  
ATOM   3523  O   HIE   462      80.404 108.793  89.869  0.00  0.00           O  
ATOM   3524  CB  HIE   462      77.446 109.394  90.340  0.00  0.00           C  
ATOM   3525  CG  HIE   462      76.098 108.729  90.384  0.00  0.00           C  
ATOM   3526  CD2 HIE   462      74.980 109.303  90.881  0.00  0.00           C  
ATOM   3527  ND1 HIE   462      75.830 107.434  89.864  0.00  0.00           N  
ATOM   3528  CE1 HIE   462      74.516 107.300  89.976  0.00  0.00           C  
ATOM   3529  NE2 HIE   462      73.929 108.406  90.445  0.00  0.00           N  
ATOM   3530  N   LEU   463      80.570 109.808  91.848  0.00  0.00           N  
ATOM   3531  CA  LEU   463      81.791 110.597  91.557  0.00  0.00           C  
ATOM   3532  C   LEU   463      83.030 109.977  92.145  0.00  0.00           C  
ATOM   3533  O   LEU   463      82.837 109.436  93.245  0.00  0.00           O  
ATOM   3534  CB  LEU   463      81.614 112.028  92.198  0.00  0.00           C  
ATOM   3535  CG  LEU   463      80.265 112.653  91.903  0.00  0.00           C  
ATOM   3536  CD1 LEU   463      80.134 113.944  92.665  0.00  0.00           C  
ATOM   3537  CD2 LEU   463      80.038 113.101  90.410  0.00  0.00           C  
ATOM   3538  N   PRO   464      84.219 110.025  91.558  0.00  0.00           N  
ATOM   3539  CA  PRO   464      85.492 109.676  92.246  0.00  0.00           C  
ATOM   3540  C   PRO   464      85.924 110.655  93.326  0.00  0.00           C  
ATOM   3541  O   PRO   464      85.456 111.755  93.298  0.00  0.00           O  
ATOM   3542  CB  PRO   464      86.611 109.720  91.167  0.00  0.00           C  
ATOM   3543  CG  PRO   464      85.856 109.686  89.856  0.00  0.00           C  
ATOM   3544  CD  PRO   464      84.539 110.399  90.155  0.00  0.00           C  
ATOM   3545  N   SER   465      86.724 110.212  94.366  0.00  0.00           N  
ATOM   3546  CA  SER   465      87.019 111.037  95.639  0.00  0.00           C  
ATOM   3547  C   SER   465      87.706 112.386  95.370  0.00  0.00           C  
ATOM   3548  O   SER   465      87.422 113.346  96.117  0.00  0.00           O  
ATOM   3549  CB  SER   465      87.904 110.269  96.645  0.00  0.00           C  
ATOM   3550  OG  SER   465      89.117 109.779  96.058  0.00  0.00           O  
ATOM   3551  N   THR   466      88.479 112.527  94.356  0.00  0.00           N  
ATOM   3552  CA  THR   466      88.932 113.841  93.831  0.00  0.00           C  
ATOM   3553  C   THR   466      87.891 114.864  93.254  0.00  0.00           C  
ATOM   3554  O   THR   466      88.326 116.012  93.049  0.00  0.00           O  
ATOM   3555  CB  THR   466      90.080 113.754  92.872  0.00  0.00           C  
ATOM   3556  CG2 THR   466      91.183 112.789  93.108  0.00  0.00           C  
ATOM   3557  OG1 THR   466      89.639 113.540  91.526  0.00  0.00           O  
ATOM   3558  N   CYS   467      86.675 114.381  93.128  0.00  0.00           N  
ATOM   3559  CA  CYS   467      85.631 115.046  92.366  0.00  0.00           C  
ATOM   3560  C   CYS   467      84.371 115.234  93.257  0.00  0.00           C  
ATOM   3561  O   CYS   467      83.234 115.209  92.792  0.00  0.00           O  
ATOM   3562  CB  CYS   467      85.299 114.140  91.132  0.00  0.00           C  
ATOM   3563  SG  CYS   467      86.652 113.937  90.068  0.00  0.00           S  
ATOM   3564  N   ARG   468      84.582 115.591  94.548  0.00  0.00           N  
ATOM   3565  CA  ARG   468      83.450 115.757  95.574  0.00  0.00           C  
ATOM   3566  C   ARG   468      83.540 117.041  96.438  0.00  0.00           C  
ATOM   3567  O   ARG   468      83.009 117.114  97.552  0.00  0.00           O  
ATOM   3568  CB  ARG   468      83.510 114.436  96.450  0.00  0.00           C  
ATOM   3569  CG  ARG   468      83.181 113.166  95.722  0.00  0.00           C  
ATOM   3570  CD  ARG   468      82.944 112.101  96.798  0.00  0.00           C  
ATOM   3571  NE  ARG   468      82.879 110.723  96.296  0.00  0.00           N  
ATOM   3572  CZ  ARG   468      83.229 109.547  96.747  0.00  0.00           C  
ATOM   3573  NH1 ARG   468      83.667 109.367  97.958  0.00  0.00           N1+
ATOM   3574  NH2 ARG   468      83.284 108.541  95.900  0.00  0.00           N  
ATOM   3575  N   ASP   469      84.192 118.050  95.960  0.00  0.00           N  
ATOM   3576  CA  ASP   469      84.172 119.428  96.500  0.00  0.00           C  
ATOM   3577  C   ASP   469      82.836 120.137  96.112  0.00  0.00           C  
ATOM   3578  O   ASP   469      82.116 119.789  95.128  0.00  0.00           O  
ATOM   3579  CB  ASP   469      85.449 120.319  96.170  0.00  0.00           C  
ATOM   3580  CG  ASP   469      86.653 119.754  96.906  0.00  0.00           C  
ATOM   3581  OD1 ASP   469      86.519 119.646  98.133  0.00  0.00           O  
ATOM   3582  OD2 ASP   469      87.690 119.400  96.241  0.00  0.00           O1-
ATOM   3583  N   ASN   470      82.477 121.147  96.880  0.00  0.00           N  
ATOM   3584  CA  ASN   470      81.534 122.224  96.593  0.00  0.00           C  
ATOM   3585  C   ASN   470      82.136 123.618  96.899  0.00  0.00           C  
ATOM   3586  O   ASN   470      83.184 123.734  97.601  0.00  0.00           O  
ATOM   3587  CB  ASN   470      80.144 121.979  97.225  0.00  0.00           C  
ATOM   3588  CG  ASN   470      80.195 121.613  98.741  0.00  0.00           C  
ATOM   3589  ND2 ASN   470      79.584 120.521  99.123  0.00  0.00           N  
ATOM   3590  OD1 ASN   470      80.841 122.240  99.561  0.00  0.00           O  
ATOM   3591  N   PHE   471      81.532 124.687  96.323  0.00  0.00           N  
ATOM   3592  CA  PHE   471      81.638 126.139  96.619  0.00  0.00           C  
ATOM   3593  C   PHE   471      82.469 126.536  97.837  0.00  0.00           C  
ATOM   3594  O   PHE   471      83.376 127.385  97.705  0.00  0.00           O  
ATOM   3595  CB  PHE   471      80.317 126.885  96.558  0.00  0.00           C  
ATOM   3596  CG  PHE   471      79.201 126.246  97.219  0.00  0.00           C  
ATOM   3597  CD1 PHE   471      78.864 126.575  98.527  0.00  0.00           C  
ATOM   3598  CD2 PHE   471      78.406 125.376  96.440  0.00  0.00           C  
ATOM   3599  CE1 PHE   471      77.768 125.889  99.110  0.00  0.00           C  
ATOM   3600  CE2 PHE   471      77.282 124.812  96.971  0.00  0.00           C  
ATOM   3601  CZ  PHE   471      76.962 125.035  98.318  0.00  0.00           C  
ATOM   3602  N   ASP   472      82.103 126.118  99.057  0.00  0.00           N  
ATOM   3603  CA  ASP   472      82.838 126.448 100.341  0.00  0.00           C  
ATOM   3604  C   ASP   472      84.291 125.946 100.484  0.00  0.00           C  
ATOM   3605  O   ASP   472      84.969 126.407 101.409  0.00  0.00           O  
ATOM   3606  CB  ASP   472      82.008 126.148 101.511  0.00  0.00           C  
ATOM   3607  CG  ASP   472      80.934 127.090 101.854  0.00  0.00           C  
ATOM   3608  OD1 ASP   472      80.830 128.119 101.170  0.00  0.00           O  
ATOM   3609  OD2 ASP   472      80.150 126.845 102.780  0.00  0.00           O1-
ATOM   3610  N   ALA   473      84.777 125.134  99.512  0.00  0.00           N  
ATOM   3611  CA  ALA   473      86.095 124.767  99.477  0.00  0.00           C  
ATOM   3612  C   ALA   473      87.074 125.938  99.512  0.00  0.00           C  
ATOM   3613  O   ALA   473      87.105 126.696  98.542  0.00  0.00           O  
ATOM   3614  CB  ALA   473      86.336 123.887  98.275  0.00  0.00           C  
ATOM   3615  N   LYS   474      88.067 125.946 100.442  0.00  0.00           N  
ATOM   3616  CA  LYS   474      89.373 126.635 100.363  0.00  0.00           C  
ATOM   3617  C   LYS   474      90.482 125.904 101.081  0.00  0.00           C  
ATOM   3618  O   LYS   474      90.364 125.568 102.262  0.00  0.00           O  
ATOM   3619  CB  LYS   474      89.269 128.154 100.747  0.00  0.00           C  
ATOM   3620  CG  LYS   474      90.599 128.909 100.628  0.00  0.00           C  
ATOM   3621  CD  LYS   474      90.418 130.324 101.124  0.00  0.00           C  
ATOM   3622  CE  LYS   474      91.746 131.142 101.133  0.00  0.00           C  
ATOM   3623  NZ  LYS   474      91.655 132.480 101.756  0.00  0.00           N1+
ATOM   3624  OXT LYS   474      91.496 125.751 100.444  0.00  0.00           O1-
ATOM   3625  N   PHE   475      62.099  51.004  77.129  0.00  0.00           N  
ATOM   3626  CA  PHE   475      63.243  50.264  77.657  0.00  0.00           C  
ATOM   3627  C   PHE   475      64.172  51.061  78.620  0.00  0.00           C  
ATOM   3628  O   PHE   475      65.340  51.400  78.257  0.00  0.00           O  
ATOM   3629  CB  PHE   475      63.840  49.359  76.660  0.00  0.00           C  
ATOM   3630  CG  PHE   475      62.991  48.153  76.521  0.00  0.00           C  
ATOM   3631  CD1 PHE   475      63.012  47.115  77.502  0.00  0.00           C  
ATOM   3632  CD2 PHE   475      62.027  48.042  75.499  0.00  0.00           C  
ATOM   3633  CE1 PHE   475      62.242  45.928  77.363  0.00  0.00           C  
ATOM   3634  CE2 PHE   475      61.170  46.953  75.449  0.00  0.00           C  
ATOM   3635  CZ  PHE   475      61.311  45.846  76.338  0.00  0.00           C  
ATOM   3636  N   THR   476      63.708  51.283  79.901  0.00  0.00           N  
ATOM   3637  CA  THR   476      64.292  51.707  81.172  0.00  0.00           C  
ATOM   3638  C   THR   476      65.312  52.841  81.167  0.00  0.00           C  
ATOM   3639  O   THR   476      64.963  53.879  81.763  0.00  0.00           O  
ATOM   3640  CB  THR   476      64.685  50.516  82.068  0.00  0.00           C  
ATOM   3641  CG2 THR   476      63.840  49.228  81.825  0.00  0.00           C  
ATOM   3642  OG1 THR   476      66.059  50.138  81.814  0.00  0.00           O  
ATOM   3643  N   LEU   477      66.417  52.729  80.430  0.00  0.00           N  
ATOM   3644  CA  LEU   477      67.482  53.784  80.353  0.00  0.00           C  
ATOM   3645  C   LEU   477      67.117  54.789  79.298  0.00  0.00           C  
ATOM   3646  O   LEU   477      66.930  54.375  78.128  0.00  0.00           O  
ATOM   3647  CB  LEU   477      68.856  53.217  80.033  0.00  0.00           C  
ATOM   3648  CG  LEU   477      70.052  54.268  79.920  0.00  0.00           C  
ATOM   3649  CD1 LEU   477      71.379  53.825  80.441  0.00  0.00           C  
ATOM   3650  CD2 LEU   477      70.323  54.530  78.405  0.00  0.00           C  
ATOM   3651  N   ILE   478      67.087  56.049  79.649  0.00  0.00           N  
ATOM   3652  CA  ILE   478      66.905  57.240  78.770  0.00  0.00           C  
ATOM   3653  C   ILE   478      67.681  58.477  79.212  0.00  0.00           C  
ATOM   3654  O   ILE   478      68.103  59.314  78.489  0.00  0.00           O  
ATOM   3655  CB  ILE   478      65.434  57.583  78.513  0.00  0.00           C  
ATOM   3656  CG1 ILE   478      64.540  57.222  79.707  0.00  0.00           C  
ATOM   3657  CG2 ILE   478      64.859  56.972  77.208  0.00  0.00           C  
ATOM   3658  CD1 ILE   478      63.172  57.869  79.833  0.00  0.00           C  
ATOM   3659  N   GLU   479      67.875  58.600  80.498  0.00  0.00           N  
ATOM   3660  CA  GLU   479      68.541  59.717  81.152  0.00  0.00           C  
ATOM   3661  C   GLU   479      69.944  60.003  80.682  0.00  0.00           C  
ATOM   3662  O   GLU   479      70.153  61.158  80.352  0.00  0.00           O  
ATOM   3663  CB  GLU   479      68.419  59.594  82.702  0.00  0.00           C  
ATOM   3664  CG  GLU   479      69.033  58.258  83.271  0.00  0.00           C  
ATOM   3665  CD  GLU   479      68.285  56.920  83.098  0.00  0.00           C  
ATOM   3666  OE1 GLU   479      67.163  56.886  82.559  0.00  0.00           O  
ATOM   3667  OE2 GLU   479      68.754  55.843  83.485  0.00  0.00           O1-
ATOM   3668  N   LEU   480      70.859  59.014  80.632  0.00  0.00           N  
ATOM   3669  CA  LEU   480      72.104  59.117  79.788  0.00  0.00           C  
ATOM   3670  C   LEU   480      71.937  59.672  78.364  0.00  0.00           C  
ATOM   3671  O   LEU   480      72.793  60.453  77.877  0.00  0.00           O  
ATOM   3672  CB  LEU   480      72.728  57.767  79.740  0.00  0.00           C  
ATOM   3673  CG  LEU   480      74.102  57.654  78.971  0.00  0.00           C  
ATOM   3674  CD1 LEU   480      75.241  58.494  79.684  0.00  0.00           C  
ATOM   3675  CD2 LEU   480      74.616  56.171  78.932  0.00  0.00           C  
ATOM   3676  N   MET   481      70.882  59.166  77.630  0.00  0.00           N  
ATOM   3677  CA  MET   481      70.671  59.623  76.264  0.00  0.00           C  
ATOM   3678  C   MET   481      70.172  61.098  76.145  0.00  0.00           C  
ATOM   3679  O   MET   481      70.553  61.765  75.156  0.00  0.00           O  
ATOM   3680  CB  MET   481      69.789  58.620  75.500  0.00  0.00           C  
ATOM   3681  CG  MET   481      70.301  57.224  75.549  0.00  0.00           C  
ATOM   3682  SD  MET   481      71.830  56.721  74.663  0.00  0.00           S  
ATOM   3683  CE  MET   481      71.192  56.932  72.937  0.00  0.00           C  
ATOM   3684  N   ILE   482      69.370  61.541  77.102  0.00  0.00           N  
ATOM   3685  CA  ILE   482      69.131  62.907  77.363  0.00  0.00           C  
ATOM   3686  C   ILE   482      70.444  63.697  77.723  0.00  0.00           C  
ATOM   3687  O   ILE   482      70.751  64.638  77.001  0.00  0.00           O  
ATOM   3688  CB  ILE   482      67.994  63.116  78.318  0.00  0.00           C  
ATOM   3689  CG1 ILE   482      66.582  63.008  77.690  0.00  0.00           C  
ATOM   3690  CG2 ILE   482      68.047  64.535  79.049  0.00  0.00           C  
ATOM   3691  CD1 ILE   482      65.984  61.634  77.691  0.00  0.00           C  
ATOM   3692  N   VAL   483      71.281  63.273  78.719  0.00  0.00           N  
ATOM   3693  CA  VAL   483      72.366  64.152  79.197  0.00  0.00           C  
ATOM   3694  C   VAL   483      73.471  64.335  78.096  0.00  0.00           C  
ATOM   3695  O   VAL   483      73.871  65.456  77.957  0.00  0.00           O  
ATOM   3696  CB  VAL   483      73.022  63.460  80.452  0.00  0.00           C  
ATOM   3697  CG1 VAL   483      74.439  63.922  80.980  0.00  0.00           C  
ATOM   3698  CG2 VAL   483      72.044  63.614  81.581  0.00  0.00           C  
ATOM   3699  N   ILE   484      73.790  63.341  77.315  0.00  0.00           N  
ATOM   3700  CA  ILE   484      74.689  63.439  76.163  0.00  0.00           C  
ATOM   3701  C   ILE   484      74.234  64.419  75.108  0.00  0.00           C  
ATOM   3702  O   ILE   484      75.005  65.338  74.702  0.00  0.00           O  
ATOM   3703  CB  ILE   484      75.001  62.065  75.505  0.00  0.00           C  
ATOM   3704  CG1 ILE   484      75.924  61.297  76.484  0.00  0.00           C  
ATOM   3705  CG2 ILE   484      75.690  62.167  74.138  0.00  0.00           C  
ATOM   3706  CD1 ILE   484      76.440  59.934  76.079  0.00  0.00           C  
ATOM   3707  N   ALA   485      72.943  64.368  74.739  0.00  0.00           N  
ATOM   3708  CA  ALA   485      72.236  65.325  73.778  0.00  0.00           C  
ATOM   3709  C   ALA   485      72.350  66.732  74.315  0.00  0.00           C  
ATOM   3710  O   ALA   485      72.852  67.652  73.559  0.00  0.00           O  
ATOM   3711  CB  ALA   485      70.747  64.870  73.657  0.00  0.00           C  
ATOM   3712  N   ILE   486      71.998  66.920  75.579  0.00  0.00           N  
ATOM   3713  CA  ILE   486      72.029  68.200  76.286  0.00  0.00           C  
ATOM   3714  C   ILE   486      73.439  68.846  76.209  0.00  0.00           C  
ATOM   3715  O   ILE   486      73.611  70.019  75.875  0.00  0.00           O  
ATOM   3716  CB  ILE   486      71.502  68.051  77.708  0.00  0.00           C  
ATOM   3717  CG1 ILE   486      69.995  67.998  77.640  0.00  0.00           C  
ATOM   3718  CG2 ILE   486      71.857  69.259  78.655  0.00  0.00           C  
ATOM   3719  CD1 ILE   486      69.086  69.123  77.144  0.00  0.00           C  
ATOM   3720  N   VAL   487      74.411  67.990  76.519  0.00  0.00           N  
ATOM   3721  CA  VAL   487      75.869  68.445  76.490  0.00  0.00           C  
ATOM   3722  C   VAL   487      76.275  68.695  75.032  0.00  0.00           C  
ATOM   3723  O   VAL   487      77.195  69.472  74.737  0.00  0.00           O  
ATOM   3724  CB  VAL   487      76.742  67.433  77.191  0.00  0.00           C  
ATOM   3725  CG1 VAL   487      78.266  67.591  76.957  0.00  0.00           C  
ATOM   3726  CG2 VAL   487      76.449  67.535  78.679  0.00  0.00           C  
ATOM   3727  N   GLY   488      75.737  68.001  74.003  0.00  0.00           N  
ATOM   3728  CA  GLY   488      76.002  68.263  72.584  0.00  0.00           C  
ATOM   3729  C   GLY   488      75.407  69.667  72.082  0.00  0.00           C  
ATOM   3730  O   GLY   488      76.054  70.453  71.419  0.00  0.00           O  
ATOM   3731  N   ILE   489      74.152  69.969  72.432  0.00  0.00           N  
ATOM   3732  CA  ILE   489      73.448  71.176  72.143  0.00  0.00           C  
ATOM   3733  C   ILE   489      74.094  72.310  72.837  0.00  0.00           C  
ATOM   3734  O   ILE   489      74.274  73.408  72.263  0.00  0.00           O  
ATOM   3735  CB  ILE   489      71.962  70.995  72.480  0.00  0.00           C  
ATOM   3736  CG1 ILE   489      71.277  70.027  71.439  0.00  0.00           C  
ATOM   3737  CG2 ILE   489      71.227  72.299  72.416  0.00  0.00           C  
ATOM   3738  CD1 ILE   489      71.494  70.254  69.938  0.00  0.00           C  
ATOM   3739  N   LEU   490      74.611  72.166  74.063  0.00  0.00           N  
ATOM   3740  CA  LEU   490      75.366  73.114  74.781  0.00  0.00           C  
ATOM   3741  C   LEU   490      76.614  73.598  73.993  0.00  0.00           C  
ATOM   3742  O   LEU   490      76.851  74.746  73.934  0.00  0.00           O  
ATOM   3743  CB  LEU   490      75.617  72.471  76.166  0.00  0.00           C  
ATOM   3744  CG  LEU   490      76.844  73.084  76.945  0.00  0.00           C  
ATOM   3745  CD1 LEU   490      76.496  74.493  77.343  0.00  0.00           C  
ATOM   3746  CD2 LEU   490      76.968  72.211  78.244  0.00  0.00           C  
ATOM   3747  N   ALA   491      77.400  72.698  73.340  0.00  0.00           N  
ATOM   3748  CA  ALA   491      78.389  73.096  72.341  0.00  0.00           C  
ATOM   3749  C   ALA   491      77.836  73.660  71.056  0.00  0.00           C  
ATOM   3750  O   ALA   491      78.549  74.526  70.537  0.00  0.00           O  
ATOM   3751  CB  ALA   491      79.296  71.816  72.076  0.00  0.00           C  
ATOM   3752  N   ALA   492      76.609  73.371  70.606  0.00  0.00           N  
ATOM   3753  CA  ALA   492      76.094  74.235  69.564  0.00  0.00           C  
ATOM   3754  C   ALA   492      75.690  75.688  69.999  0.00  0.00           C  
ATOM   3755  O   ALA   492      75.989  76.632  69.220  0.00  0.00           O  
ATOM   3756  CB  ALA   492      74.960  73.471  68.869  0.00  0.00           C  
ATOM   3757  N   VAL   493      75.029  75.921  71.190  0.00  0.00           N  
ATOM   3758  CA  VAL   493      74.788  77.281  71.667  0.00  0.00           C  
ATOM   3759  C   VAL   493      76.019  78.049  72.056  0.00  0.00           C  
ATOM   3760  O   VAL   493      76.016  79.274  72.055  0.00  0.00           O  
ATOM   3761  CB  VAL   493      73.698  77.402  72.717  0.00  0.00           C  
ATOM   3762  CG1 VAL   493      72.793  78.597  72.463  0.00  0.00           C  
ATOM   3763  CG2 VAL   493      72.792  76.076  72.828  0.00  0.00           C  
ATOM   3764  N   ALA   494      77.113  77.318  72.169  0.00  0.00           N  
ATOM   3765  CA  ALA   494      78.367  77.966  72.543  0.00  0.00           C  
ATOM   3766  C   ALA   494      78.934  78.732  71.283  0.00  0.00           C  
ATOM   3767  O   ALA   494      79.402  79.898  71.410  0.00  0.00           O  
ATOM   3768  CB  ALA   494      79.398  76.953  72.898  0.00  0.00           C  
ATOM   3769  N   LEU   495      78.780  78.172  70.091  0.00  0.00           N  
ATOM   3770  CA  LEU   495      79.236  78.664  68.768  0.00  0.00           C  
ATOM   3771  C   LEU   495      78.944  80.190  68.548  0.00  0.00           C  
ATOM   3772  O   LEU   495      79.904  80.948  68.347  0.00  0.00           O  
ATOM   3773  CB  LEU   495      78.662  77.706  67.668  0.00  0.00           C  
ATOM   3774  CG  LEU   495      78.738  78.279  66.258  0.00  0.00           C  
ATOM   3775  CD1 LEU   495      80.192  78.575  65.810  0.00  0.00           C  
ATOM   3776  CD2 LEU   495      77.798  77.592  65.216  0.00  0.00           C  
ATOM   3777  N   PRO   496      77.667  80.680  68.472  0.00  0.00           N  
ATOM   3778  CA  PRO   496      77.407  82.141  68.151  0.00  0.00           C  
ATOM   3779  C   PRO   496      77.996  83.185  69.081  0.00  0.00           C  
ATOM   3780  O   PRO   496      78.463  84.236  68.658  0.00  0.00           O  
ATOM   3781  CB  PRO   496      75.918  82.234  68.033  0.00  0.00           C  
ATOM   3782  CG  PRO   496      75.393  81.077  68.800  0.00  0.00           C  
ATOM   3783  CD  PRO   496      76.381  79.976  68.566  0.00  0.00           C  
ATOM   3784  N   ALA   497      77.986  82.889  70.398  0.00  0.00           N  
ATOM   3785  CA  ALA   497      78.440  83.699  71.451  0.00  0.00           C  
ATOM   3786  C   ALA   497      79.972  83.866  71.525  0.00  0.00           C  
ATOM   3787  O   ALA   497      80.499  84.888  71.828  0.00  0.00           O  
ATOM   3788  CB  ALA   497      77.865  83.208  72.823  0.00  0.00           C  
ATOM   3789  N   TYR   498      80.608  82.704  71.353  0.00  0.00           N  
ATOM   3790  CA  TYR   498      82.073  82.741  71.279  0.00  0.00           C  
ATOM   3791  C   TYR   498      82.700  83.346  70.033  0.00  0.00           C  
ATOM   3792  O   TYR   498      83.695  84.091  70.073  0.00  0.00           O  
ATOM   3793  CB  TYR   498      82.706  81.320  71.611  0.00  0.00           C  
ATOM   3794  CG  TYR   498      84.155  81.034  71.246  0.00  0.00           C  
ATOM   3795  CD1 TYR   498      85.138  80.939  72.282  0.00  0.00           C  
ATOM   3796  CD2 TYR   498      84.533  80.865  69.927  0.00  0.00           C  
ATOM   3797  CE1 TYR   498      86.473  80.788  71.932  0.00  0.00           C  
ATOM   3798  CE2 TYR   498      85.881  80.721  69.571  0.00  0.00           C  
ATOM   3799  CZ  TYR   498      86.865  80.610  70.558  0.00  0.00           C  
ATOM   3800  OH  TYR   498      88.105  80.400  70.243  0.00  0.00           O  
ATOM   3801  N   GLN   499      82.047  83.177  68.856  0.00  0.00           N  
ATOM   3802  CA  GLN   499      82.388  83.995  67.739  0.00  0.00           C  
ATOM   3803  C   GLN   499      82.145  85.525  68.100  0.00  0.00           C  
ATOM   3804  O   GLN   499      83.074  86.278  67.821  0.00  0.00           O  
ATOM   3805  CB  GLN   499      81.568  83.705  66.448  0.00  0.00           C  
ATOM   3806  CG  GLN   499      81.762  82.182  65.991  0.00  0.00           C  
ATOM   3807  CD  GLN   499      81.771  82.183  64.473  0.00  0.00           C  
ATOM   3808  NE2 GLN   499      80.802  82.707  63.791  0.00  0.00           N  
ATOM   3809  OE1 GLN   499      82.797  81.900  63.878  0.00  0.00           O  
ATOM   3810  N   ASP   500      80.959  85.920  68.527  0.00  0.00           N  
ATOM   3811  CA  ASP   500      80.646  87.335  68.779  0.00  0.00           C  
ATOM   3812  C   ASP   500      81.704  87.941  69.768  0.00  0.00           C  
ATOM   3813  O   ASP   500      82.173  89.075  69.649  0.00  0.00           O  
ATOM   3814  CB  ASP   500      79.128  87.652  69.014  0.00  0.00           C  
ATOM   3815  CG  ASP   500      78.800  89.003  69.573  0.00  0.00           C  
ATOM   3816  OD1 ASP   500      77.876  89.683  69.079  0.00  0.00           O  
ATOM   3817  OD2 ASP   500      79.278  89.420  70.612  0.00  0.00           O1-
ATOM   3818  N   TYR   501      82.049  87.104  70.775  0.00  0.00           N  
ATOM   3819  CA  TYR   501      82.969  87.597  71.810  0.00  0.00           C  
ATOM   3820  C   TYR   501      84.368  87.656  71.248  0.00  0.00           C  
ATOM   3821  O   TYR   501      85.047  88.764  71.442  0.00  0.00           O  
ATOM   3822  CB  TYR   501      82.881  86.757  73.167  0.00  0.00           C  
ATOM   3823  CG  TYR   501      83.607  87.270  74.430  0.00  0.00           C  
ATOM   3824  CD1 TYR   501      82.933  88.242  75.182  0.00  0.00           C  
ATOM   3825  CD2 TYR   501      84.853  86.674  74.889  0.00  0.00           C  
ATOM   3826  CE1 TYR   501      83.489  88.761  76.450  0.00  0.00           C  
ATOM   3827  CE2 TYR   501      85.355  87.064  76.154  0.00  0.00           C  
ATOM   3828  CZ  TYR   501      84.699  88.127  76.899  0.00  0.00           C  
ATOM   3829  OH  TYR   501      85.114  88.394  78.129  0.00  0.00           O  
ATOM   3830  N   THR   502      84.868  86.669  70.511  0.00  0.00           N  
ATOM   3831  CA  THR   502      86.214  86.752  69.889  0.00  0.00           C  
ATOM   3832  C   THR   502      86.301  87.748  68.758  0.00  0.00           C  
ATOM   3833  O   THR   502      87.372  88.331  68.718  0.00  0.00           O  
ATOM   3834  CB  THR   502      86.721  85.308  69.452  0.00  0.00           C  
ATOM   3835  CG2 THR   502      86.762  84.409  70.624  0.00  0.00           C  
ATOM   3836  OG1 THR   502      86.002  84.657  68.417  0.00  0.00           O  
ATOM   3837  N   ALA   503      85.224  87.876  67.923  0.00  0.00           N  
ATOM   3838  CA  ALA   503      85.105  89.005  67.039  0.00  0.00           C  
ATOM   3839  C   ALA   503      85.505  90.372  67.725  0.00  0.00           C  
ATOM   3840  O   ALA   503      86.469  91.040  67.311  0.00  0.00           O  
ATOM   3841  CB  ALA   503      83.698  89.161  66.443  0.00  0.00           C  
ATOM   3842  N   ARG   504      84.728  90.704  68.792  0.00  0.00           N  
ATOM   3843  CA  ARG   504      85.004  91.975  69.559  0.00  0.00           C  
ATOM   3844  C   ARG   504      86.497  91.929  70.080  0.00  0.00           C  
ATOM   3845  O   ARG   504      87.193  92.952  69.994  0.00  0.00           O  
ATOM   3846  CB  ARG   504      84.016  92.129  70.747  0.00  0.00           C  
ATOM   3847  CG  ARG   504      82.534  92.328  70.312  0.00  0.00           C  
ATOM   3848  CD  ARG   504      81.540  92.362  71.568  0.00  0.00           C  
ATOM   3849  NE  ARG   504      80.172  91.938  71.218  0.00  0.00           N  
ATOM   3850  CZ  ARG   504      79.025  92.634  71.038  0.00  0.00           C  
ATOM   3851  NH1 ARG   504      78.952  93.856  71.402  0.00  0.00           N1+
ATOM   3852  NH2 ARG   504      77.994  92.051  70.596  0.00  0.00           N  
ATOM   3853  N   ALA   505      87.049  90.840  70.532  0.00  0.00           N  
ATOM   3854  CA  ALA   505      88.474  90.733  70.930  0.00  0.00           C  
ATOM   3855  C   ALA   505      89.453  90.846  69.735  0.00  0.00           C  
ATOM   3856  O   ALA   505      90.527  91.400  69.874  0.00  0.00           O  
ATOM   3857  CB  ALA   505      88.529  89.352  71.596  0.00  0.00           C  
ATOM   3858  N   GLN   506      89.138  90.272  68.591  0.00  0.00           N  
ATOM   3859  CA  GLN   506      89.870  90.286  67.298  0.00  0.00           C  
ATOM   3860  C   GLN   506      89.868  91.670  66.585  0.00  0.00           C  
ATOM   3861  O   GLN   506      90.879  92.036  65.989  0.00  0.00           O  
ATOM   3862  CB  GLN   506      89.265  89.238  66.369  0.00  0.00           C  
ATOM   3863  CG  GLN   506      89.787  87.779  66.730  0.00  0.00           C  
ATOM   3864  CD  GLN   506      88.779  86.662  66.373  0.00  0.00           C  
ATOM   3865  NE2 GLN   506      89.066  85.415  66.645  0.00  0.00           N  
ATOM   3866  OE1 GLN   506      87.725  86.844  65.762  0.00  0.00           O  
ATOM   3867  N   VAL   507      88.837  92.492  66.802  0.00  0.00           N  
ATOM   3868  CA  VAL   507      88.780  93.865  66.418  0.00  0.00           C  
ATOM   3869  C   VAL   507      89.574  94.817  67.349  0.00  0.00           C  
ATOM   3870  O   VAL   507      90.290  95.643  66.842  0.00  0.00           O  
ATOM   3871  CB  VAL   507      87.281  94.277  66.121  0.00  0.00           C  
ATOM   3872  CG1 VAL   507      87.442  95.791  65.782  0.00  0.00           C  
ATOM   3873  CG2 VAL   507      86.678  93.511  64.901  0.00  0.00           C  
ATOM   3874  N   SER   508      89.199  94.776  68.608  0.00  0.00           N  
ATOM   3875  CA  SER   508      89.815  95.644  69.675  0.00  0.00           C  
ATOM   3876  C   SER   508      91.286  95.480  69.806  0.00  0.00           C  
ATOM   3877  O   SER   508      91.890  96.455  70.254  0.00  0.00           O  
ATOM   3878  CB  SER   508      89.145  95.610  71.061  0.00  0.00           C  
ATOM   3879  OG  SER   508      89.081  94.324  71.552  0.00  0.00           O  
ATOM   3880  N   GLU   509      91.919  94.354  69.450  0.00  0.00           N  
ATOM   3881  CA  GLU   509      93.361  94.244  69.191  0.00  0.00           C  
ATOM   3882  C   GLU   509      93.881  95.120  68.063  0.00  0.00           C  
ATOM   3883  O   GLU   509      94.846  95.862  68.179  0.00  0.00           O  
ATOM   3884  CB  GLU   509      93.674  92.761  68.943  0.00  0.00           C  
ATOM   3885  CG  GLU   509      95.091  92.605  68.449  0.00  0.00           C  
ATOM   3886  CD  GLU   509      95.604  91.146  68.227  0.00  0.00           C  
ATOM   3887  OE1 GLU   509      96.130  90.833  67.105  0.00  0.00           O  
ATOM   3888  OE2 GLU   509      95.464  90.195  69.056  0.00  0.00           O1-
ATOM   3889  N   ALA   510      93.194  95.124  66.902  0.00  0.00           N  
ATOM   3890  CA  ALA   510      93.575  95.957  65.706  0.00  0.00           C  
ATOM   3891  C   ALA   510      93.432  97.453  65.927  0.00  0.00           C  
ATOM   3892  O   ALA   510      94.360  98.180  65.569  0.00  0.00           O  
ATOM   3893  CB  ALA   510      92.665  95.418  64.503  0.00  0.00           C  
ATOM   3894  N   ILE   511      92.407  97.896  66.646  0.00  0.00           N  
ATOM   3895  CA  ILE   511      92.138  99.261  67.035  0.00  0.00           C  
ATOM   3896  C   ILE   511      93.177  99.641  68.098  0.00  0.00           C  
ATOM   3897  O   ILE   511      93.755 100.742  67.935  0.00  0.00           O  
ATOM   3898  CB  ILE   511      90.740  99.518  67.468  0.00  0.00           C  
ATOM   3899  CG1 ILE   511      89.677  98.969  66.495  0.00  0.00           C  
ATOM   3900  CG2 ILE   511      90.391 100.965  67.857  0.00  0.00           C  
ATOM   3901  CD1 ILE   511      89.393  99.758  65.209  0.00  0.00           C  
ATOM   3902  N   LEU   512      93.626  98.732  69.044  0.00  0.00           N  
ATOM   3903  CA  LEU   512      94.754  99.027  69.902  0.00  0.00           C  
ATOM   3904  C   LEU   512      96.108  99.144  69.234  0.00  0.00           C  
ATOM   3905  O   LEU   512      96.848 100.038  69.510  0.00  0.00           O  
ATOM   3906  CB  LEU   512      94.734  97.998  71.062  0.00  0.00           C  
ATOM   3907  CG  LEU   512      95.827  98.055  72.165  0.00  0.00           C  
ATOM   3908  CD1 LEU   512      95.927  99.445  72.794  0.00  0.00           C  
ATOM   3909  CD2 LEU   512      95.632  96.912  73.153  0.00  0.00           C  
ATOM   3910  N   LEU   513      96.443  98.297  68.287  0.00  0.00           N  
ATOM   3911  CA  LEU   513      97.696  98.346  67.485  0.00  0.00           C  
ATOM   3912  C   LEU   513      97.765  99.638  66.662  0.00  0.00           C  
ATOM   3913  O   LEU   513      98.873  99.992  66.196  0.00  0.00           O  
ATOM   3914  CB  LEU   513      97.682  97.147  66.546  0.00  0.00           C  
ATOM   3915  CG  LEU   513      98.090  95.903  67.260  0.00  0.00           C  
ATOM   3916  CD1 LEU   513      97.784  94.713  66.406  0.00  0.00           C  
ATOM   3917  CD2 LEU   513      99.528  95.838  67.658  0.00  0.00           C  
ATOM   3918  N   ALA   514      96.639 100.274  66.377  0.00  0.00           N  
ATOM   3919  CA  ALA   514      96.559 101.571  65.595  0.00  0.00           C  
ATOM   3920  C   ALA   514      96.560 102.700  66.568  0.00  0.00           C  
ATOM   3921  O   ALA   514      96.936 103.802  66.155  0.00  0.00           O  
ATOM   3922  CB  ALA   514      95.279 101.384  64.801  0.00  0.00           C  
ATOM   3923  N   GLU   515      96.302 102.477  67.837  0.00  0.00           N  
ATOM   3924  CA  GLU   515      96.493 103.529  68.904  0.00  0.00           C  
ATOM   3925  C   GLU   515      98.005 103.826  69.092  0.00  0.00           C  
ATOM   3926  O   GLU   515      98.860 102.995  68.791  0.00  0.00           O  
ATOM   3927  CB  GLU   515      95.801 103.168  70.241  0.00  0.00           C  
ATOM   3928  CG  GLU   515      94.289 103.612  70.388  0.00  0.00           C  
ATOM   3929  CD  GLU   515      94.193 105.152  70.278  0.00  0.00           C  
ATOM   3930  OE1 GLU   515      95.229 105.880  70.255  0.00  0.00           O  
ATOM   3931  OE2 GLU   515      93.088 105.696  70.113  0.00  0.00           O1-
ATOM   3932  N   GLY   516      98.330 104.980  69.694  0.00  0.00           N  
ATOM   3933  CA  GLY   516      99.669 105.638  69.690  0.00  0.00           C  
ATOM   3934  C   GLY   516     100.336 105.859  68.303  0.00  0.00           C  
ATOM   3935  O   GLY   516     100.919 106.897  68.018  0.00  0.00           O  
ATOM   3936  N   GLN   517     100.239 104.889  67.352  0.00  0.00           N  
ATOM   3937  CA  GLN   517     100.571 105.048  65.883  0.00  0.00           C  
ATOM   3938  C   GLN   517      99.879 106.183  65.124  0.00  0.00           C  
ATOM   3939  O   GLN   517     100.466 107.122  64.571  0.00  0.00           O  
ATOM   3940  CB  GLN   517     100.379 103.677  65.201  0.00  0.00           C  
ATOM   3941  CG  GLN   517     100.730 103.625  63.734  0.00  0.00           C  
ATOM   3942  CD  GLN   517     100.641 102.206  63.030  0.00  0.00           C  
ATOM   3943  NE2 GLN   517      99.845 101.288  63.565  0.00  0.00           N  
ATOM   3944  OE1 GLN   517     101.023 102.031  61.856  0.00  0.00           O  
ATOM   3945  N   LYS   518      98.578 106.367  65.433  0.00  0.00           N  
ATOM   3946  CA  LYS   518      97.866 107.563  65.030  0.00  0.00           C  
ATOM   3947  C   LYS   518      98.295 108.877  65.626  0.00  0.00           C  
ATOM   3948  O   LYS   518      98.091 109.945  64.997  0.00  0.00           O  
ATOM   3949  CB  LYS   518      96.393 107.225  65.226  0.00  0.00           C  
ATOM   3950  CG  LYS   518      95.911 107.086  66.663  0.00  0.00           C  
ATOM   3951  CD  LYS   518      94.446 106.962  66.962  0.00  0.00           C  
ATOM   3952  CE  LYS   518      93.702 108.077  67.607  0.00  0.00           C  
ATOM   3953  NZ  LYS   518      94.092 108.196  69.079  0.00  0.00           N1+
ATOM   3954  N   SER   519      98.995 108.777  66.724  0.00  0.00           N  
ATOM   3955  CA  SER   519      99.510 109.992  67.414  0.00  0.00           C  
ATOM   3956  C   SER   519     100.855 110.414  66.713  0.00  0.00           C  
ATOM   3957  O   SER   519     101.236 111.594  66.616  0.00  0.00           O  
ATOM   3958  CB  SER   519      99.817 109.716  68.910  0.00  0.00           C  
ATOM   3959  OG  SER   519      98.660 109.284  69.597  0.00  0.00           O  
ATOM   3960  N   ALA   520     101.638 109.462  66.237  0.00  0.00           N  
ATOM   3961  CA  ALA   520     102.858 109.781  65.532  0.00  0.00           C  
ATOM   3962  C   ALA   520     102.589 110.321  64.125  0.00  0.00           C  
ATOM   3963  O   ALA   520     103.147 111.363  63.692  0.00  0.00           O  
ATOM   3964  CB  ALA   520     103.631 108.446  65.465  0.00  0.00           C  
ATOM   3965  N   VAL   521     101.652 109.683  63.400  0.00  0.00           N  
ATOM   3966  CA  VAL   521     100.961 110.273  62.218  0.00  0.00           C  
ATOM   3967  C   VAL   521     100.319 111.648  62.528  0.00  0.00           C  
ATOM   3968  O   VAL   521     100.342 112.545  61.667  0.00  0.00           O  
ATOM   3969  CB  VAL   521      99.818 109.347  61.659  0.00  0.00           C  
ATOM   3970  CG1 VAL   521      99.122 109.926  60.389  0.00  0.00           C  
ATOM   3971  CG2 VAL   521     100.408 107.925  61.421  0.00  0.00           C  
ATOM   3972  N   THR   522      99.717 111.786  63.685  0.00  0.00           N  
ATOM   3973  CA  THR   522      99.137 113.079  64.147  0.00  0.00           C  
ATOM   3974  C   THR   522     100.318 114.079  64.171  0.00  0.00           C  
ATOM   3975  O   THR   522     100.205 115.186  63.652  0.00  0.00           O  
ATOM   3976  CB  THR   522      98.383 112.946  65.467  0.00  0.00           C  
ATOM   3977  CG2 THR   522      98.097 114.211  66.285  0.00  0.00           C  
ATOM   3978  OG1 THR   522      97.100 112.363  65.264  0.00  0.00           O  
ATOM   3979  N   GLU   523     101.376 113.744  64.870  0.00  0.00           N  
ATOM   3980  CA  GLU   523     102.516 114.670  65.173  0.00  0.00           C  
ATOM   3981  C   GLU   523     103.324 115.036  63.870  0.00  0.00           C  
ATOM   3982  O   GLU   523     103.614 116.190  63.707  0.00  0.00           O  
ATOM   3983  CB  GLU   523     103.382 114.044  66.297  0.00  0.00           C  
ATOM   3984  CG  GLU   523     102.763 114.271  67.698  0.00  0.00           C  
ATOM   3985  CD  GLU   523     103.090 115.599  68.285  0.00  0.00           C  
ATOM   3986  OE1 GLU   523     104.247 116.038  68.208  0.00  0.00           O  
ATOM   3987  OE2 GLU   523     102.204 116.217  68.963  0.00  0.00           O1-
ATOM   3988  N   TYR   524     103.620 114.067  62.901  0.00  0.00           N  
ATOM   3989  CA  TYR   524     104.129 114.428  61.595  0.00  0.00           C  
ATOM   3990  C   TYR   524     103.176 115.381  60.927  0.00  0.00           C  
ATOM   3991  O   TYR   524     103.526 116.550  60.656  0.00  0.00           O  
ATOM   3992  CB  TYR   524     104.527 113.151  60.840  0.00  0.00           C  
ATOM   3993  CG  TYR   524     105.140 113.295  59.430  0.00  0.00           C  
ATOM   3994  CD1 TYR   524     106.427 112.868  59.091  0.00  0.00           C  
ATOM   3995  CD2 TYR   524     104.271 113.698  58.375  0.00  0.00           C  
ATOM   3996  CE1 TYR   524     106.891 113.010  57.811  0.00  0.00           C  
ATOM   3997  CE2 TYR   524     104.672 113.809  57.037  0.00  0.00           C  
ATOM   3998  CZ  TYR   524     106.058 113.524  56.772  0.00  0.00           C  
ATOM   3999  OH  TYR   524     106.572 113.638  55.504  0.00  0.00           O  
ATOM   4000  N   TYR   525     101.890 115.017  60.712  0.00  0.00           N  
ATOM   4001  CA  TYR   525     100.947 115.864  59.958  0.00  0.00           C  
ATOM   4002  C   TYR   525     100.757 117.284  60.533  0.00  0.00           C  
ATOM   4003  O   TYR   525     100.808 118.297  59.799  0.00  0.00           O  
ATOM   4004  CB  TYR   525      99.659 115.139  59.599  0.00  0.00           C  
ATOM   4005  CG  TYR   525      98.522 115.923  59.066  0.00  0.00           C  
ATOM   4006  CD1 TYR   525      98.580 116.367  57.741  0.00  0.00           C  
ATOM   4007  CD2 TYR   525      97.363 116.195  59.791  0.00  0.00           C  
ATOM   4008  CE1 TYR   525      97.512 116.996  57.074  0.00  0.00           C  
ATOM   4009  CE2 TYR   525      96.257 116.822  59.181  0.00  0.00           C  
ATOM   4010  CZ  TYR   525      96.332 117.145  57.795  0.00  0.00           C  
ATOM   4011  OH  TYR   525      95.341 117.891  57.178  0.00  0.00           O  
ATOM   4012  N   LEU   526     100.749 117.395  61.887  0.00  0.00           N  
ATOM   4013  CA  LEU   526     100.506 118.612  62.621  0.00  0.00           C  
ATOM   4014  C   LEU   526     101.608 119.730  62.388  0.00  0.00           C  
ATOM   4015  O   LEU   526     101.382 120.960  62.502  0.00  0.00           O  
ATOM   4016  CB  LEU   526     100.213 118.313  64.108  0.00  0.00           C  
ATOM   4017  CG  LEU   526      99.923 119.593  64.973  0.00  0.00           C  
ATOM   4018  CD1 LEU   526      98.665 120.388  64.531  0.00  0.00           C  
ATOM   4019  CD2 LEU   526      99.522 119.106  66.399  0.00  0.00           C  
ATOM   4020  N   ASN   527     102.779 119.325  61.949  0.00  0.00           N  
ATOM   4021  CA  ASN   527     104.053 120.088  61.754  0.00  0.00           C  
ATOM   4022  C   ASN   527     104.506 120.210  60.285  0.00  0.00           C  
ATOM   4023  O   ASN   527     104.708 121.245  59.686  0.00  0.00           O  
ATOM   4024  CB  ASN   527     105.052 119.486  62.781  0.00  0.00           C  
ATOM   4025  CG  ASN   527     104.524 119.933  64.128  0.00  0.00           C  
ATOM   4026  ND2 ASN   527     104.103 118.982  64.898  0.00  0.00           N  
ATOM   4027  OD1 ASN   527     104.543 121.124  64.419  0.00  0.00           O  
ATOM   4028  N   HIE   528     104.351 119.085  59.570  0.00  0.00           N  
ATOM   4029  CA  HIE   528     104.686 118.989  58.178  0.00  0.00           C  
ATOM   4030  C   HIE   528     103.574 119.554  57.249  0.00  0.00           C  
ATOM   4031  O   HIE   528     103.853 119.907  56.116  0.00  0.00           O  
ATOM   4032  CB  HIE   528     105.158 117.574  57.875  0.00  0.00           C  
ATOM   4033  CG  HIE   528     106.592 117.344  57.795  0.00  0.00           C  
ATOM   4034  CD2 HIE   528     107.269 116.781  56.733  0.00  0.00           C  
ATOM   4035  ND1 HIE   528     107.359 117.109  58.919  0.00  0.00           N  
ATOM   4036  CE1 HIE   528     108.540 116.670  58.499  0.00  0.00           C  
ATOM   4037  NE2 HIE   528     108.523 116.418  57.188  0.00  0.00           N  
ATOM   4038  N   GLY   529     102.337 119.662  57.797  0.00  0.00           N  
ATOM   4039  CA  GLY   529     101.190 120.291  57.079  0.00  0.00           C  
ATOM   4040  C   GLY   529     100.438 119.283  56.080  0.00  0.00           C  
ATOM   4041  O   GLY   529      99.244 119.345  55.817  0.00  0.00           O  
ATOM   4042  N   LYS   530     101.284 118.342  55.590  0.00  0.00           N  
ATOM   4043  CA  LYS   530     100.855 117.269  54.682  0.00  0.00           C  
ATOM   4044  C   LYS   530     101.173 115.883  55.381  0.00  0.00           C  
ATOM   4045  O   LYS   530     102.095 115.704  56.194  0.00  0.00           O  
ATOM   4046  CB  LYS   530     101.466 117.433  53.328  0.00  0.00           C  
ATOM   4047  CG  LYS   530     101.265 118.789  52.581  0.00  0.00           C  
ATOM   4048  CD  LYS   530      99.801 118.942  52.052  0.00  0.00           C  
ATOM   4049  CE  LYS   530      99.534 120.332  51.508  0.00  0.00           C  
ATOM   4050  NZ  LYS   530      98.086 120.433  51.136  0.00  0.00           N1+
ATOM   4051  N   TRP   531     100.384 114.836  54.997  0.00  0.00           N  
ATOM   4052  CA  TRP   531     100.350 113.499  55.535  0.00  0.00           C  
ATOM   4053  C   TRP   531     101.632 112.657  55.193  0.00  0.00           C  
ATOM   4054  O   TRP   531     102.222 112.812  54.098  0.00  0.00           O  
ATOM   4055  CB  TRP   531      99.106 112.775  55.115  0.00  0.00           C  
ATOM   4056  CG  TRP   531      97.751 113.204  55.563  0.00  0.00           C  
ATOM   4057  CD1 TRP   531      96.955 113.871  54.764  0.00  0.00           C  
ATOM   4058  CD2 TRP   531      97.156 113.299  56.894  0.00  0.00           C  
ATOM   4059  CE2 TRP   531      95.928 113.969  56.764  0.00  0.00           C  
ATOM   4060  CE3 TRP   531      97.508 112.790  58.198  0.00  0.00           C  
ATOM   4061  NE1 TRP   531      95.870 114.270  55.397  0.00  0.00           N  
ATOM   4062  CZ2 TRP   531      95.007 114.136  57.790  0.00  0.00           C  
ATOM   4063  CZ3 TRP   531      96.591 113.055  59.247  0.00  0.00           C  
ATOM   4064  CH2 TRP   531      95.398 113.716  59.073  0.00  0.00           C  
ATOM   4065  N   PRO   532     102.029 111.797  56.197  0.00  0.00           N  
ATOM   4066  CA  PRO   532     103.128 110.844  55.980  0.00  0.00           C  
ATOM   4067  C   PRO   532     102.702 109.607  55.111  0.00  0.00           C  
ATOM   4068  O   PRO   532     101.574 109.109  55.286  0.00  0.00           O  
ATOM   4069  CB  PRO   532     103.589 110.288  57.392  0.00  0.00           C  
ATOM   4070  CG  PRO   532     102.275 110.431  58.137  0.00  0.00           C  
ATOM   4071  CD  PRO   532     101.451 111.587  57.487  0.00  0.00           C  
ATOM   4072  N   GLU   533     103.557 109.046  54.242  0.00  0.00           N  
ATOM   4073  CA  GLU   533     103.204 108.057  53.260  0.00  0.00           C  
ATOM   4074  C   GLU   533     102.968 106.643  53.866  0.00  0.00           C  
ATOM   4075  O   GLU   533     102.193 105.827  53.456  0.00  0.00           O  
ATOM   4076  CB  GLU   533     104.313 107.996  52.238  0.00  0.00           C  
ATOM   4077  CG  GLU   533     104.146 107.105  51.057  0.00  0.00           C  
ATOM   4078  CD  GLU   533     105.201 107.268  49.918  0.00  0.00           C  
ATOM   4079  OE1 GLU   533     106.178 108.028  49.973  0.00  0.00           O  
ATOM   4080  OE2 GLU   533     105.004 106.640  48.853  0.00  0.00           O1-
ATOM   4081  N   ASN   534     103.763 106.335  54.883  0.00  0.00           N  
ATOM   4082  CA  ASN   534     104.090 104.985  55.393  0.00  0.00           C  
ATOM   4083  C   ASN   534     104.808 104.987  56.770  0.00  0.00           C  
ATOM   4084  O   ASN   534     105.136 106.000  57.395  0.00  0.00           O  
ATOM   4085  CB  ASN   534     104.899 104.166  54.435  0.00  0.00           C  
ATOM   4086  CG  ASN   534     106.398 104.500  54.511  0.00  0.00           C  
ATOM   4087  ND2 ASN   534     107.165 103.437  54.637  0.00  0.00           N  
ATOM   4088  OD1 ASN   534     106.831 105.632  54.638  0.00  0.00           O  
ATOM   4089  N   ASN   535     105.196 103.795  57.276  0.00  0.00           N  
ATOM   4090  CA  ASN   535     105.783 103.643  58.609  0.00  0.00           C  
ATOM   4091  C   ASN   535     107.107 104.349  58.853  0.00  0.00           C  
ATOM   4092  O   ASN   535     107.320 104.986  59.933  0.00  0.00           O  
ATOM   4093  CB  ASN   535     105.897 102.225  59.012  0.00  0.00           C  
ATOM   4094  CG  ASN   535     104.555 101.612  59.347  0.00  0.00           C  
ATOM   4095  ND2 ASN   535     104.534 100.462  59.998  0.00  0.00           N  
ATOM   4096  OD1 ASN   535     103.489 102.087  59.001  0.00  0.00           O  
ATOM   4097  N   THR   536     108.013 104.328  57.895  0.00  0.00           N  
ATOM   4098  CA  THR   536     109.340 104.960  57.935  0.00  0.00           C  
ATOM   4099  C   THR   536     109.218 106.482  57.817  0.00  0.00           C  
ATOM   4100  O   THR   536     109.875 107.193  58.529  0.00  0.00           O  
ATOM   4101  CB  THR   536     110.257 104.310  56.935  0.00  0.00           C  
ATOM   4102  CG2 THR   536     110.379 102.757  57.040  0.00  0.00           C  
ATOM   4103  OG1 THR   536     109.844 104.473  55.583  0.00  0.00           O  
ATOM   4104  N   SER   537     108.402 107.016  56.964  0.00  0.00           N  
ATOM   4105  CA  SER   537     108.127 108.485  56.887  0.00  0.00           C  
ATOM   4106  C   SER   537     107.434 109.062  58.156  0.00  0.00           C  
ATOM   4107  O   SER   537     107.995 109.978  58.697  0.00  0.00           O  
ATOM   4108  CB  SER   537     107.390 108.779  55.566  0.00  0.00           C  
ATOM   4109  OG  SER   537     106.200 108.011  55.415  0.00  0.00           O  
ATOM   4110  N   ALA   538     106.376 108.440  58.683  0.00  0.00           N  
ATOM   4111  CA  ALA   538     105.795 108.755  60.010  0.00  0.00           C  
ATOM   4112  C   ALA   538     106.649 108.454  61.268  0.00  0.00           C  
ATOM   4113  O   ALA   538     106.260 108.782  62.366  0.00  0.00           O  
ATOM   4114  CB  ALA   538     104.583 107.907  60.155  0.00  0.00           C  
ATOM   4115  N   GLY   539     107.859 107.839  61.053  0.00  0.00           N  
ATOM   4116  CA  GLY   539     108.792 107.459  62.171  0.00  0.00           C  
ATOM   4117  C   GLY   539     108.417 106.302  63.062  0.00  0.00           C  
ATOM   4118  O   GLY   539     109.111 106.043  64.070  0.00  0.00           O  
ATOM   4119  N   VAL   540     107.417 105.536  62.682  0.00  0.00           N  
ATOM   4120  CA  VAL   540     106.982 104.343  63.392  0.00  0.00           C  
ATOM   4121  C   VAL   540     107.841 103.116  63.001  0.00  0.00           C  
ATOM   4122  O   VAL   540     108.695 103.184  62.126  0.00  0.00           O  
ATOM   4123  CB  VAL   540     105.463 104.165  63.367  0.00  0.00           C  
ATOM   4124  CG1 VAL   540     104.737 105.463  63.803  0.00  0.00           C  
ATOM   4125  CG2 VAL   540     105.001 103.685  62.015  0.00  0.00           C  
ATOM   4126  N   ALA   541     107.516 101.969  63.579  0.00  0.00           N  
ATOM   4127  CA  ALA   541     108.231 100.662  63.539  0.00  0.00           C  
ATOM   4128  C   ALA   541     108.290 100.243  62.063  0.00  0.00           C  
ATOM   4129  O   ALA   541     107.228 100.173  61.407  0.00  0.00           O  
ATOM   4130  CB  ALA   541     107.343  99.714  64.435  0.00  0.00           C  
ATOM   4131  N   SER   542     109.502 100.048  61.517  0.00  0.00           N  
ATOM   4132  CA  SER   542     109.743 100.123  60.106  0.00  0.00           C  
ATOM   4133  C   SER   542     109.323  98.877  59.212  0.00  0.00           C  
ATOM   4134  O   SER   542     109.517  98.861  57.983  0.00  0.00           O  
ATOM   4135  CB  SER   542     111.200 100.466  59.866  0.00  0.00           C  
ATOM   4136  OG  SER   542     112.067  99.592  60.476  0.00  0.00           O  
ATOM   4137  N   SER   543     108.571  97.980  59.829  0.00  0.00           N  
ATOM   4138  CA  SER   543     107.886  96.906  59.159  0.00  0.00           C  
ATOM   4139  C   SER   543     106.475  96.589  59.739  0.00  0.00           C  
ATOM   4140  O   SER   543     106.303  96.446  60.994  0.00  0.00           O  
ATOM   4141  CB  SER   543     108.686  95.618  59.280  0.00  0.00           C  
ATOM   4142  OG  SER   543     108.018  94.528  58.753  0.00  0.00           O  
ATOM   4143  N   PRO   544     105.456  96.419  58.887  0.00  0.00           N  
ATOM   4144  CA  PRO   544     104.084  96.315  59.397  0.00  0.00           C  
ATOM   4145  C   PRO   544     103.863  95.038  60.141  0.00  0.00           C  
ATOM   4146  O   PRO   544     102.841  94.882  60.743  0.00  0.00           O  
ATOM   4147  CB  PRO   544     103.302  96.383  58.078  0.00  0.00           C  
ATOM   4148  CG  PRO   544     104.193  95.683  57.010  0.00  0.00           C  
ATOM   4149  CD  PRO   544     105.503  96.246  57.426  0.00  0.00           C  
ATOM   4150  N   THR   545     104.768  94.086  60.158  0.00  0.00           N  
ATOM   4151  CA  THR   545     104.893  92.811  60.980  0.00  0.00           C  
ATOM   4152  C   THR   545     105.639  92.975  62.265  0.00  0.00           C  
ATOM   4153  O   THR   545     105.587  92.083  63.065  0.00  0.00           O  
ATOM   4154  CB  THR   545     105.377  91.589  60.145  0.00  0.00           C  
ATOM   4155  CG2 THR   545     104.882  91.672  58.670  0.00  0.00           C  
ATOM   4156  OG1 THR   545     106.775  91.429  60.096  0.00  0.00           O  
ATOM   4157  N   ASP   546     106.367  94.051  62.539  0.00  0.00           N  
ATOM   4158  CA  ASP   546     107.023  94.322  63.798  0.00  0.00           C  
ATOM   4159  C   ASP   546     106.127  94.422  65.112  0.00  0.00           C  
ATOM   4160  O   ASP   546     106.584  94.390  66.214  0.00  0.00           O  
ATOM   4161  CB  ASP   546     107.867  95.666  63.748  0.00  0.00           C  
ATOM   4162  CG  ASP   546     109.147  95.566  62.798  0.00  0.00           C  
ATOM   4163  OD1 ASP   546     109.648  94.456  62.452  0.00  0.00           O  
ATOM   4164  OD2 ASP   546     109.616  96.640  62.373  0.00  0.00           O1-
ATOM   4165  N   ILE   547     104.859  94.716  64.804  0.00  0.00           N  
ATOM   4166  CA  ILE   547     103.840  94.816  65.847  0.00  0.00           C  
ATOM   4167  C   ILE   547     102.644  93.852  65.534  0.00  0.00           C  
ATOM   4168  O   ILE   547     101.614  93.912  66.179  0.00  0.00           O  
ATOM   4169  CB  ILE   547     103.380  96.283  66.047  0.00  0.00           C  
ATOM   4170  CG1 ILE   547     102.979  96.952  64.705  0.00  0.00           C  
ATOM   4171  CG2 ILE   547     104.459  97.133  66.724  0.00  0.00           C  
ATOM   4172  CD1 ILE   547     102.369  98.342  64.982  0.00  0.00           C  
ATOM   4173  N   LYS   548     102.898  92.843  64.686  0.00  0.00           N  
ATOM   4174  CA  LYS   548     102.100  91.628  64.463  0.00  0.00           C  
ATOM   4175  C   LYS   548     101.471  91.134  65.761  0.00  0.00           C  
ATOM   4176  O   LYS   548     102.208  91.077  66.716  0.00  0.00           O  
ATOM   4177  CB  LYS   548     102.890  90.554  63.681  0.00  0.00           C  
ATOM   4178  CG  LYS   548     102.201  89.225  63.479  0.00  0.00           C  
ATOM   4179  CD  LYS   548     103.142  88.100  62.962  0.00  0.00           C  
ATOM   4180  CE  LYS   548     102.320  86.845  62.852  0.00  0.00           C  
ATOM   4181  NZ  LYS   548     103.166  85.724  62.668  0.00  0.00           N1+
ATOM   4182  N   GLY   549     100.156  90.986  65.758  0.00  0.00           N  
ATOM   4183  CA  GLY   549      99.286  90.714  66.936  0.00  0.00           C  
ATOM   4184  C   GLY   549      99.179  89.269  67.296  0.00  0.00           C  
ATOM   4185  O   GLY   549     100.101  88.493  67.036  0.00  0.00           O  
ATOM   4186  N   LYS   550      98.116  88.837  67.925  0.00  0.00           N  
ATOM   4187  CA  LYS   550      97.868  87.401  68.065  0.00  0.00           C  
ATOM   4188  C   LYS   550      96.781  86.880  67.054  0.00  0.00           C  
ATOM   4189  O   LYS   550      96.706  85.710  66.693  0.00  0.00           O  
ATOM   4190  CB  LYS   550      97.593  87.081  69.570  0.00  0.00           C  
ATOM   4191  CG  LYS   550      97.193  85.649  69.872  0.00  0.00           C  
ATOM   4192  CD  LYS   550      97.482  85.322  71.332  0.00  0.00           C  
ATOM   4193  CE  LYS   550      97.400  83.748  71.505  0.00  0.00           C  
ATOM   4194  NZ  LYS   550      96.037  83.180  71.188  0.00  0.00           N1+
ATOM   4195  N   TYR   551      95.979  87.817  66.524  0.00  0.00           N  
ATOM   4196  CA  TYR   551      94.969  87.644  65.489  0.00  0.00           C  
ATOM   4197  C   TYR   551      95.255  88.548  64.281  0.00  0.00           C  
ATOM   4198  O   TYR   551      95.106  88.075  63.122  0.00  0.00           O  
ATOM   4199  CB  TYR   551      93.599  87.799  66.006  0.00  0.00           C  
ATOM   4200  CG  TYR   551      93.124  86.895  67.080  0.00  0.00           C  
ATOM   4201  CD1 TYR   551      93.339  87.298  68.387  0.00  0.00           C  
ATOM   4202  CD2 TYR   551      92.508  85.727  66.823  0.00  0.00           C  
ATOM   4203  CE1 TYR   551      92.634  86.687  69.432  0.00  0.00           C  
ATOM   4204  CE2 TYR   551      91.998  84.945  67.862  0.00  0.00           C  
ATOM   4205  CZ  TYR   551      91.964  85.458  69.213  0.00  0.00           C  
ATOM   4206  OH  TYR   551      91.512  84.749  70.193  0.00  0.00           O  
ATOM   4207  N   VAL   552      95.892  89.727  64.413  0.00  0.00           N  
ATOM   4208  CA  VAL   552      96.326  90.639  63.295  0.00  0.00           C  
ATOM   4209  C   VAL   552      97.716  90.208  62.730  0.00  0.00           C  
ATOM   4210  O   VAL   552      98.704  90.011  63.466  0.00  0.00           O  
ATOM   4211  CB  VAL   552      96.273  92.101  63.951  0.00  0.00           C  
ATOM   4212  CG1 VAL   552      96.822  93.138  62.961  0.00  0.00           C  
ATOM   4213  CG2 VAL   552      94.908  92.531  64.497  0.00  0.00           C  
ATOM   4214  N   LYS   553      97.831  90.211  61.378  0.00  0.00           N  
ATOM   4215  CA  LYS   553      99.142  89.896  60.657  0.00  0.00           C  
ATOM   4216  C   LYS   553     100.059  91.091  60.487  0.00  0.00           C  
ATOM   4217  O   LYS   553     101.246  90.937  60.790  0.00  0.00           O  
ATOM   4218  CB  LYS   553      98.703  89.327  59.304  0.00  0.00           C  
ATOM   4219  CG  LYS   553      99.872  88.650  58.560  0.00  0.00           C  
ATOM   4220  CD  LYS   553      99.485  88.485  57.083  0.00  0.00           C  
ATOM   4221  CE  LYS   553     100.664  87.836  56.352  0.00  0.00           C  
ATOM   4222  NZ  LYS   553     101.784  88.734  56.283  0.00  0.00           N1+
ATOM   4223  N   GLU   554      99.537  92.202  59.923  0.00  0.00           N  
ATOM   4224  CA  GLU   554     100.082  93.462  59.482  0.00  0.00           C  
ATOM   4225  C   GLU   554      99.336  94.708  59.992  0.00  0.00           C  
ATOM   4226  O   GLU   554      98.092  94.748  60.003  0.00  0.00           O  
ATOM   4227  CB  GLU   554     100.231  93.566  58.004  0.00  0.00           C  
ATOM   4228  CG  GLU   554     101.153  92.438  57.476  0.00  0.00           C  
ATOM   4229  CD  GLU   554     101.076  92.415  55.950  0.00  0.00           C  
ATOM   4230  OE1 GLU   554     100.760  93.406  55.269  0.00  0.00           O  
ATOM   4231  OE2 GLU   554     101.288  91.289  55.453  0.00  0.00           O1-
ATOM   4232  N   VAL   555     100.045  95.727  60.464  0.00  0.00           N  
ATOM   4233  CA  VAL   555      99.451  97.052  60.547  0.00  0.00           C  
ATOM   4234  C   VAL   555     100.364  98.120  60.038  0.00  0.00           C  
ATOM   4235  O   VAL   555     101.590  98.112  60.192  0.00  0.00           O  
ATOM   4236  CB  VAL   555      99.114  97.400  61.996  0.00  0.00           C  
ATOM   4237  CG1 VAL   555      98.416  98.701  62.307  0.00  0.00           C  
ATOM   4238  CG2 VAL   555      98.218  96.309  62.683  0.00  0.00           C  
ATOM   4239  N   GLU   556      99.793  98.944  59.137  0.00  0.00           N  
ATOM   4240  CA  GLU   556     100.615  99.923  58.373  0.00  0.00           C  
ATOM   4241  C   GLU   556      99.900 101.269  58.016  0.00  0.00           C  
ATOM   4242  O   GLU   556      98.766 101.334  57.525  0.00  0.00           O  
ATOM   4243  CB  GLU   556     101.071  99.298  57.073  0.00  0.00           C  
ATOM   4244  CG  GLU   556     102.456  99.731  56.595  0.00  0.00           C  
ATOM   4245  CD  GLU   556     103.133  99.032  55.362  0.00  0.00           C  
ATOM   4246  OE1 GLU   556     102.435  98.205  54.806  0.00  0.00           O  
ATOM   4247  OE2 GLU   556     104.279  99.359  55.006  0.00  0.00           O1-
ATOM   4248  N   VAL   557     100.608 102.367  58.141  0.00  0.00           N  
ATOM   4249  CA  VAL   557     100.297 103.616  57.577  0.00  0.00           C  
ATOM   4250  C   VAL   557     100.240 103.584  56.070  0.00  0.00           C  
ATOM   4251  O   VAL   557     101.125 102.980  55.478  0.00  0.00           O  
ATOM   4252  CB  VAL   557     101.327 104.687  58.129  0.00  0.00           C  
ATOM   4253  CG1 VAL   557     101.108 106.182  57.716  0.00  0.00           C  
ATOM   4254  CG2 VAL   557     101.549 104.738  59.713  0.00  0.00           C  
ATOM   4255  N   LYS   558      99.408 104.357  55.483  0.00  0.00           N  
ATOM   4256  CA  LYS   558      99.210 104.503  53.963  0.00  0.00           C  
ATOM   4257  C   LYS   558      98.632 105.880  53.661  0.00  0.00           C  
ATOM   4258  O   LYS   558      97.446 106.087  53.713  0.00  0.00           O  
ATOM   4259  CB  LYS   558      98.236 103.477  53.431  0.00  0.00           C  
ATOM   4260  CG  LYS   558      98.599 102.000  53.701  0.00  0.00           C  
ATOM   4261  CD  LYS   558      99.613 101.521  52.671  0.00  0.00           C  
ATOM   4262  CE  LYS   558     100.443 100.339  53.253  0.00  0.00           C  
ATOM   4263  NZ  LYS   558     101.471  99.853  52.236  0.00  0.00           N1+
ATOM   4264  N   ASN   559      99.465 106.895  53.503  0.00  0.00           N  
ATOM   4265  CA  ASN   559      99.114 108.280  53.213  0.00  0.00           C  
ATOM   4266  C   ASN   559      98.199 108.953  54.244  0.00  0.00           C  
ATOM   4267  O   ASN   559      97.066 109.384  53.949  0.00  0.00           O  
ATOM   4268  CB  ASN   559      98.604 108.352  51.715  0.00  0.00           C  
ATOM   4269  CG  ASN   559      99.799 108.368  50.734  0.00  0.00           C  
ATOM   4270  ND2 ASN   559      99.936 107.330  49.950  0.00  0.00           N  
ATOM   4271  OD1 ASN   559     100.417 109.384  50.694  0.00  0.00           O  
ATOM   4272  N   GLY   560      98.637 109.222  55.454  0.00  0.00           N  
ATOM   4273  CA  GLY   560      97.771 109.754  56.506  0.00  0.00           C  
ATOM   4274  C   GLY   560      96.486 108.938  56.904  0.00  0.00           C  
ATOM   4275  O   GLY   560      95.499 109.526  57.458  0.00  0.00           O  
ATOM   4276  N   VAL   561      96.398 107.647  56.484  0.00  0.00           N  
ATOM   4277  CA  VAL   561      95.445 106.627  56.865  0.00  0.00           C  
ATOM   4278  C   VAL   561      96.236 105.491  57.540  0.00  0.00           C  
ATOM   4279  O   VAL   561      97.409 105.225  57.245  0.00  0.00           O  
ATOM   4280  CB  VAL   561      94.489 106.220  55.735  0.00  0.00           C  
ATOM   4281  CG1 VAL   561      93.397 105.225  56.187  0.00  0.00           C  
ATOM   4282  CG2 VAL   561      93.745 107.402  55.029  0.00  0.00           C  
ATOM   4283  N   VAL   562      95.739 104.903  58.698  0.00  0.00           N  
ATOM   4284  CA  VAL   562      96.271 103.626  59.187  0.00  0.00           C  
ATOM   4285  C   VAL   562      95.496 102.421  58.634  0.00  0.00           C  
ATOM   4286  O   VAL   562      94.295 102.580  58.579  0.00  0.00           O  
ATOM   4287  CB  VAL   562      96.491 103.617  60.640  0.00  0.00           C  
ATOM   4288  CG1 VAL   562      97.354 102.445  61.042  0.00  0.00           C  
ATOM   4289  CG2 VAL   562      97.075 104.907  61.195  0.00  0.00           C  
ATOM   4290  N   THR   563      96.068 101.260  58.450  0.00  0.00           N  
ATOM   4291  CA  THR   563      95.361 100.042  58.005  0.00  0.00           C  
ATOM   4292  C   THR   563      95.774  98.787  58.730  0.00  0.00           C  
ATOM   4293  O   THR   563      96.953  98.699  59.094  0.00  0.00           O  
ATOM   4294  CB  THR   563      95.626  99.880  56.468  0.00  0.00           C  
ATOM   4295  CG2 THR   563      95.432 101.099  55.603  0.00  0.00           C  
ATOM   4296  OG1 THR   563      97.007  99.573  56.187  0.00  0.00           O  
ATOM   4297  N   ALA   564      94.880  97.774  58.832  0.00  0.00           N  
ATOM   4298  CA  ALA   564      95.201  96.607  59.707  0.00  0.00           C  
ATOM   4299  C   ALA   564      94.644  95.338  58.961  0.00  0.00           C  
ATOM   4300  O   ALA   564      93.475  95.310  58.579  0.00  0.00           O  
ATOM   4301  CB  ALA   564      94.621  96.901  61.074  0.00  0.00           C  
ATOM   4302  N   THR   565      95.419  94.269  58.871  0.00  0.00           N  
ATOM   4303  CA  THR   565      95.066  93.016  58.197  0.00  0.00           C  
ATOM   4304  C   THR   565      95.150  91.773  58.998  0.00  0.00           C  
ATOM   4305  O   THR   565      96.158  91.518  59.698  0.00  0.00           O  
ATOM   4306  CB  THR   565      95.872  92.866  56.917  0.00  0.00           C  
ATOM   4307  CG2 THR   565      95.025  92.509  55.824  0.00  0.00           C  
ATOM   4308  OG1 THR   565      96.443  94.072  56.545  0.00  0.00           O  
ATOM   4309  N   MET   566      94.188  90.888  58.876  0.00  0.00           N  
ATOM   4310  CA  MET   566      94.045  89.751  59.786  0.00  0.00           C  
ATOM   4311  C   MET   566      94.949  88.628  59.223  0.00  0.00           C  
ATOM   4312  O   MET   566      95.201  88.571  58.023  0.00  0.00           O  
ATOM   4313  CB  MET   566      92.586  89.204  60.010  0.00  0.00           C  
ATOM   4314  CG  MET   566      91.650  90.343  60.606  0.00  0.00           C  
ATOM   4315  SD  MET   566      92.149  91.387  61.998  0.00  0.00           S  
ATOM   4316  CE  MET   566      92.094  90.087  63.352  0.00  0.00           C  
ATOM   4317  N   LEU   567      95.345  87.720  60.098  0.00  0.00           N  
ATOM   4318  CA  LEU   567      95.871  86.407  59.786  0.00  0.00           C  
ATOM   4319  C   LEU   567      94.859  85.620  59.009  0.00  0.00           C  
ATOM   4320  O   LEU   567      93.648  85.792  59.158  0.00  0.00           O  
ATOM   4321  CB  LEU   567      96.176  85.645  61.047  0.00  0.00           C  
ATOM   4322  CG  LEU   567      97.434  86.176  61.757  0.00  0.00           C  
ATOM   4323  CD1 LEU   567      97.524  85.625  63.150  0.00  0.00           C  
ATOM   4324  CD2 LEU   567      98.774  86.036  61.037  0.00  0.00           C  
ATOM   4325  N   SER   568      95.353  84.667  58.220  0.00  0.00           N  
ATOM   4326  CA  SER   568      94.495  83.732  57.424  0.00  0.00           C  
ATOM   4327  C   SER   568      93.610  82.697  58.220  0.00  0.00           C  
ATOM   4328  O   SER   568      92.618  82.062  57.745  0.00  0.00           O  
ATOM   4329  CB  SER   568      95.423  83.072  56.378  0.00  0.00           C  
ATOM   4330  OG  SER   568      96.297  82.077  56.931  0.00  0.00           O  
ATOM   4331  N   SER   569      93.979  82.379  59.486  0.00  0.00           N  
ATOM   4332  CA  SER   569      93.203  81.422  60.271  0.00  0.00           C  
ATOM   4333  C   SER   569      93.237  81.752  61.765  0.00  0.00           C  
ATOM   4334  O   SER   569      93.883  82.728  62.240  0.00  0.00           O  
ATOM   4335  CB  SER   569      93.788  79.966  60.123  0.00  0.00           C  
ATOM   4336  OG  SER   569      92.896  79.017  60.720  0.00  0.00           O  
ATOM   4337  N   GLY   570      92.374  81.091  62.537  0.00  0.00           N  
ATOM   4338  CA  GLY   570      92.011  81.464  63.888  0.00  0.00           C  
ATOM   4339  C   GLY   570      91.072  82.605  64.104  0.00  0.00           C  
ATOM   4340  O   GLY   570      90.245  82.617  65.021  0.00  0.00           O  
ATOM   4341  N   VAL   571      90.941  83.485  63.148  0.00  0.00           N  
ATOM   4342  CA  VAL   571      90.154  84.690  63.261  0.00  0.00           C  
ATOM   4343  C   VAL   571      88.611  84.507  62.995  0.00  0.00           C  
ATOM   4344  O   VAL   571      88.020  85.256  62.226  0.00  0.00           O  
ATOM   4345  CB  VAL   571      90.714  85.795  62.339  0.00  0.00           C  
ATOM   4346  CG1 VAL   571      90.441  87.163  62.959  0.00  0.00           C  
ATOM   4347  CG2 VAL   571      92.265  85.733  62.149  0.00  0.00           C  
ATOM   4348  N   ASN   572      87.997  83.650  63.749  0.00  0.00           N  
ATOM   4349  CA  ASN   572      86.634  83.194  63.625  0.00  0.00           C  
ATOM   4350  C   ASN   572      86.248  82.654  62.176  0.00  0.00           C  
ATOM   4351  O   ASN   572      87.197  82.436  61.388  0.00  0.00           O  
ATOM   4352  CB  ASN   572      85.628  84.283  64.171  0.00  0.00           C  
ATOM   4353  CG  ASN   572      85.331  85.525  63.338  0.00  0.00           C  
ATOM   4354  ND2 ASN   572      85.547  86.694  63.948  0.00  0.00           N  
ATOM   4355  OD1 ASN   572      84.827  85.446  62.258  0.00  0.00           O  
ATOM   4356  N   ASN   573      84.988  82.416  61.900  0.00  0.00           N  
ATOM   4357  CA  ASN   573      84.498  81.914  60.653  0.00  0.00           C  
ATOM   4358  C   ASN   573      84.520  82.919  59.440  0.00  0.00           C  
ATOM   4359  O   ASN   573      84.508  82.527  58.315  0.00  0.00           O  
ATOM   4360  CB  ASN   573      83.050  81.507  60.869  0.00  0.00           C  
ATOM   4361  CG  ASN   573      82.343  80.911  59.675  0.00  0.00           C  
ATOM   4362  ND2 ASN   573      81.060  81.024  59.683  0.00  0.00           N  
ATOM   4363  OD1 ASN   573      82.934  80.111  58.935  0.00  0.00           O  
ATOM   4364  N   GLU   574      84.534  84.303  59.628  0.00  0.00           N  
ATOM   4365  CA  GLU   574      84.227  85.338  58.632  0.00  0.00           C  
ATOM   4366  C   GLU   574      85.206  86.590  58.485  0.00  0.00           C  
ATOM   4367  O   GLU   574      85.051  87.333  57.528  0.00  0.00           O  
ATOM   4368  CB  GLU   574      82.803  85.882  58.910  0.00  0.00           C  
ATOM   4369  CG  GLU   574      81.659  84.834  59.076  0.00  0.00           C  
ATOM   4370  CD  GLU   574      80.298  85.591  59.242  0.00  0.00           C  
ATOM   4371  OE1 GLU   574      80.302  86.875  59.186  0.00  0.00           O  
ATOM   4372  OE2 GLU   574      79.234  84.968  59.403  0.00  0.00           O1-
ATOM   4373  N   ILE   575      86.136  86.831  59.457  0.00  0.00           N  
ATOM   4374  CA  ILE   575      87.086  87.899  59.366  0.00  0.00           C  
ATOM   4375  C   ILE   575      88.567  87.395  59.196  0.00  0.00           C  
ATOM   4376  O   ILE   575      89.442  88.265  59.283  0.00  0.00           O  
ATOM   4377  CB  ILE   575      86.702  88.933  60.493  0.00  0.00           C  
ATOM   4378  CG1 ILE   575      87.451  88.742  61.815  0.00  0.00           C  
ATOM   4379  CG2 ILE   575      85.206  89.225  60.673  0.00  0.00           C  
ATOM   4380  CD1 ILE   575      87.099  89.803  62.839  0.00  0.00           C  
ATOM   4381  N   LYS   576      88.762  86.127  58.931  0.00  0.00           N  
ATOM   4382  CA  LYS   576      89.975  85.511  58.374  0.00  0.00           C  
ATOM   4383  C   LYS   576      90.538  86.249  57.099  0.00  0.00           C  
ATOM   4384  O   LYS   576      89.823  86.256  56.143  0.00  0.00           O  
ATOM   4385  CB  LYS   576      89.714  83.973  58.155  0.00  0.00           C  
ATOM   4386  CG  LYS   576      89.716  83.295  59.534  0.00  0.00           C  
ATOM   4387  CD  LYS   576      89.640  81.715  59.496  0.00  0.00           C  
ATOM   4388  CE  LYS   576      88.390  81.214  58.917  0.00  0.00           C  
ATOM   4389  NZ  LYS   576      88.132  79.801  59.106  0.00  0.00           N1+
ATOM   4390  N   GLY   577      91.770  86.727  57.126  0.00  0.00           N  
ATOM   4391  CA  GLY   577      92.452  87.485  56.162  0.00  0.00           C  
ATOM   4392  C   GLY   577      91.965  88.814  55.831  0.00  0.00           C  
ATOM   4393  O   GLY   577      92.643  89.461  55.070  0.00  0.00           O  
ATOM   4394  N   LYS   578      90.759  89.260  56.381  0.00  0.00           N  
ATOM   4395  CA  LYS   578      90.091  90.535  56.067  0.00  0.00           C  
ATOM   4396  C   LYS   578      90.866  91.796  56.598  0.00  0.00           C  
ATOM   4397  O   LYS   578      91.932  91.645  57.191  0.00  0.00           O  
ATOM   4398  CB  LYS   578      88.626  90.523  56.532  0.00  0.00           C  
ATOM   4399  CG  LYS   578      87.598  89.507  55.896  0.00  0.00           C  
ATOM   4400  CD  LYS   578      87.620  89.453  54.339  0.00  0.00           C  
ATOM   4401  CE  LYS   578      86.546  88.458  53.856  0.00  0.00           C  
ATOM   4402  NZ  LYS   578      86.047  88.613  52.513  0.00  0.00           N1+
ATOM   4403  N   LYS   579      90.459  93.033  56.400  0.00  0.00           N  
ATOM   4404  CA  LYS   579      91.204  94.333  56.674  0.00  0.00           C  
ATOM   4405  C   LYS   579      90.286  95.434  57.208  0.00  0.00           C  
ATOM   4406  O   LYS   579      89.060  95.413  57.079  0.00  0.00           O  
ATOM   4407  CB  LYS   579      91.842  94.762  55.318  0.00  0.00           C  
ATOM   4408  CG  LYS   579      90.934  95.380  54.278  0.00  0.00           C  
ATOM   4409  CD  LYS   579      91.692  95.633  52.986  0.00  0.00           C  
ATOM   4410  CE  LYS   579      90.711  96.443  52.163  0.00  0.00           C  
ATOM   4411  NZ  LYS   579      91.275  96.741  50.888  0.00  0.00           N1+
ATOM   4412  N   LEU   580      90.894  96.390  57.850  0.00  0.00           N  
ATOM   4413  CA  LEU   580      90.349  97.496  58.670  0.00  0.00           C  
ATOM   4414  C   LEU   580      91.120  98.818  58.307  0.00  0.00           C  
ATOM   4415  O   LEU   580      92.141  98.792  57.679  0.00  0.00           O  
ATOM   4416  CB  LEU   580      90.544  97.107  60.140  0.00  0.00           C  
ATOM   4417  CG  LEU   580      89.490  96.086  60.580  0.00  0.00           C  
ATOM   4418  CD1 LEU   580      89.953  95.637  61.914  0.00  0.00           C  
ATOM   4419  CD2 LEU   580      88.060  96.633  60.691  0.00  0.00           C  
ATOM   4420  N   SER   581      90.666  99.898  58.897  0.00  0.00           N  
ATOM   4421  CA  SER   581      91.381 101.184  58.921  0.00  0.00           C  
ATOM   4422  C   SER   581      91.025 102.157  60.087  0.00  0.00           C  
ATOM   4423  O   SER   581      90.062 101.972  60.794  0.00  0.00           O  
ATOM   4424  CB  SER   581      91.347 101.874  57.522  0.00  0.00           C  
ATOM   4425  OG  SER   581      90.040 102.255  57.261  0.00  0.00           O  
ATOM   4426  N   LEU   582      91.852 103.190  60.192  0.00  0.00           N  
ATOM   4427  CA  LEU   582      91.647 104.442  60.889  0.00  0.00           C  
ATOM   4428  C   LEU   582      92.002 105.701  60.043  0.00  0.00           C  
ATOM   4429  O   LEU   582      93.073 105.668  59.494  0.00  0.00           O  
ATOM   4430  CB  LEU   582      92.412 104.472  62.239  0.00  0.00           C  
ATOM   4431  CG  LEU   582      91.855 103.856  63.562  0.00  0.00           C  
ATOM   4432  CD1 LEU   582      91.740 102.383  63.476  0.00  0.00           C  
ATOM   4433  CD2 LEU   582      92.603 104.363  64.840  0.00  0.00           C  
ATOM   4434  N   TRP   583      91.222 106.784  60.192  0.00  0.00           N  
ATOM   4435  CA  TRP   583      91.474 108.006  59.440  0.00  0.00           C  
ATOM   4436  C   TRP   583      91.194 109.204  60.324  0.00  0.00           C  
ATOM   4437  O   TRP   583      90.695 109.048  61.451  0.00  0.00           O  
ATOM   4438  CB  TRP   583      90.751 107.962  58.097  0.00  0.00           C  
ATOM   4439  CG  TRP   583      89.276 107.960  58.251  0.00  0.00           C  
ATOM   4440  CD1 TRP   583      88.459 109.027  58.272  0.00  0.00           C  
ATOM   4441  CD2 TRP   583      88.387 106.809  58.464  0.00  0.00           C  
ATOM   4442  CE2 TRP   583      87.072 107.273  58.798  0.00  0.00           C  
ATOM   4443  CE3 TRP   583      88.586 105.418  58.374  0.00  0.00           C  
ATOM   4444  NE1 TRP   583      87.198 108.644  58.568  0.00  0.00           N  
ATOM   4445  CZ2 TRP   583      85.990 106.408  59.026  0.00  0.00           C  
ATOM   4446  CZ3 TRP   583      87.548 104.523  58.656  0.00  0.00           C  
ATOM   4447  CH2 TRP   583      86.271 105.024  58.987  0.00  0.00           C  
ATOM   4448  N   ALA   584      91.488 110.424  59.748  0.00  0.00           N  
ATOM   4449  CA  ALA   584      91.588 111.636  60.479  0.00  0.00           C  
ATOM   4450  C   ALA   584      91.185 112.835  59.603  0.00  0.00           C  
ATOM   4451  O   ALA   584      91.394 112.754  58.338  0.00  0.00           O  
ATOM   4452  CB  ALA   584      92.973 111.795  60.964  0.00  0.00           C  
ATOM   4453  N   ARG   585      90.731 113.872  60.265  0.00  0.00           N  
ATOM   4454  CA  ARG   585      90.329 115.154  59.809  0.00  0.00           C  
ATOM   4455  C   ARG   585      91.148 116.240  60.411  0.00  0.00           C  
ATOM   4456  O   ARG   585      91.721 116.040  61.491  0.00  0.00           O  
ATOM   4457  CB  ARG   585      88.793 115.300  59.989  0.00  0.00           C  
ATOM   4458  CG  ARG   585      87.926 114.260  59.223  0.00  0.00           C  
ATOM   4459  CD  ARG   585      87.854 114.286  57.700  0.00  0.00           C  
ATOM   4460  NE  ARG   585      86.797 113.416  57.293  0.00  0.00           N  
ATOM   4461  CZ  ARG   585      86.363 113.247  56.045  0.00  0.00           C  
ATOM   4462  NH1 ARG   585      86.995 113.823  55.043  0.00  0.00           N1+
ATOM   4463  NH2 ARG   585      85.423 112.479  55.768  0.00  0.00           N  
ATOM   4464  N   ARG   586      91.341 117.371  59.714  0.00  0.00           N  
ATOM   4465  CA  ARG   586      92.265 118.446  60.210  0.00  0.00           C  
ATOM   4466  C   ARG   586      91.538 119.325  61.225  0.00  0.00           C  
ATOM   4467  O   ARG   586      90.349 119.628  61.148  0.00  0.00           O  
ATOM   4468  CB  ARG   586      92.707 119.245  58.945  0.00  0.00           C  
ATOM   4469  CG  ARG   586      94.025 119.983  59.146  0.00  0.00           C  
ATOM   4470  CD  ARG   586      94.288 120.832  57.904  0.00  0.00           C  
ATOM   4471  NE  ARG   586      95.529 121.538  58.140  0.00  0.00           N  
ATOM   4472  CZ  ARG   586      96.625 121.420  57.463  0.00  0.00           C  
ATOM   4473  NH1 ARG   586      96.817 120.482  56.618  0.00  0.00           N1+
ATOM   4474  NH2 ARG   586      97.698 122.113  57.759  0.00  0.00           N  
ATOM   4475  N   GLU   587      92.257 119.910  62.199  0.00  0.00           N  
ATOM   4476  CA  GLU   587      91.874 120.661  63.414  0.00  0.00           C  
ATOM   4477  C   GLU   587      92.825 121.845  63.687  0.00  0.00           C  
ATOM   4478  O   GLU   587      92.486 122.664  64.568  0.00  0.00           O  
ATOM   4479  CB  GLU   587      91.704 119.735  64.614  0.00  0.00           C  
ATOM   4480  CG  GLU   587      90.505 118.812  64.431  0.00  0.00           C  
ATOM   4481  CD  GLU   587      89.141 119.478  64.587  0.00  0.00           C  
ATOM   4482  OE1 GLU   587      89.090 120.703  64.731  0.00  0.00           O  
ATOM   4483  OE2 GLU   587      88.061 118.808  64.472  0.00  0.00           O1-
ATOM   4484  N   ASN   588      93.964 121.878  63.038  0.00  0.00           N  
ATOM   4485  CA  ASN   588      95.027 122.918  62.894  0.00  0.00           C  
ATOM   4486  C   ASN   588      95.841 123.271  64.170  0.00  0.00           C  
ATOM   4487  O   ASN   588      96.940 123.767  64.078  0.00  0.00           O  
ATOM   4488  CB  ASN   588      94.275 124.174  62.388  0.00  0.00           C  
ATOM   4489  CG  ASN   588      93.443 123.936  61.124  0.00  0.00           C  
ATOM   4490  ND2 ASN   588      92.138 124.160  61.132  0.00  0.00           N  
ATOM   4491  OD1 ASN   588      93.963 123.616  60.065  0.00  0.00           O  
ATOM   4492  N   GLY   589      95.255 123.119  65.325  0.00  0.00           N  
ATOM   4493  CA  GLY   589      96.040 122.912  66.591  0.00  0.00           C  
ATOM   4494  C   GLY   589      95.878 121.538  67.302  0.00  0.00           C  
ATOM   4495  O   GLY   589      96.205 121.428  68.482  0.00  0.00           O  
ATOM   4496  N   SER   590      95.335 120.586  66.628  0.00  0.00           N  
ATOM   4497  CA  SER   590      94.968 119.163  66.962  0.00  0.00           C  
ATOM   4498  C   SER   590      94.777 118.285  65.697  0.00  0.00           C  
ATOM   4499  O   SER   590      95.015 118.790  64.584  0.00  0.00           O  
ATOM   4500  CB  SER   590      93.562 119.164  67.742  0.00  0.00           C  
ATOM   4501  OG  SER   590      93.243 117.822  68.214  0.00  0.00           O  
ATOM   4502  N   VAL   591      94.378 116.951  65.777  0.00  0.00           N  
ATOM   4503  CA  VAL   591      93.871 116.173  64.638  0.00  0.00           C  
ATOM   4504  C   VAL   591      92.708 115.306  65.098  0.00  0.00           C  
ATOM   4505  O   VAL   591      92.785 114.770  66.224  0.00  0.00           O  
ATOM   4506  CB  VAL   591      95.018 115.247  64.098  0.00  0.00           C  
ATOM   4507  CG1 VAL   591      94.538 114.331  62.990  0.00  0.00           C  
ATOM   4508  CG2 VAL   591      96.202 116.056  63.567  0.00  0.00           C  
ATOM   4509  N   LYS   592      91.515 115.275  64.389  0.00  0.00           N  
ATOM   4510  CA  LYS   592      90.356 114.491  64.835  0.00  0.00           C  
ATOM   4511  C   LYS   592      90.322 113.071  64.205  0.00  0.00           C  
ATOM   4512  O   LYS   592      90.347 112.944  62.985  0.00  0.00           O  
ATOM   4513  CB  LYS   592      89.145 115.215  64.438  0.00  0.00           C  
ATOM   4514  CG  LYS   592      87.777 114.785  64.919  0.00  0.00           C  
ATOM   4515  CD  LYS   592      86.644 115.443  64.060  0.00  0.00           C  
ATOM   4516  CE  LYS   592      85.349 114.950  64.688  0.00  0.00           C  
ATOM   4517  NZ  LYS   592      84.198 115.815  64.496  0.00  0.00           N1+
ATOM   4518  N   TRP   593      90.304 112.028  64.993  0.00  0.00           N  
ATOM   4519  CA  TRP   593      90.273 110.652  64.547  0.00  0.00           C  
ATOM   4520  C   TRP   593      88.921 109.920  64.490  0.00  0.00           C  
ATOM   4521  O   TRP   593      88.048 110.083  65.335  0.00  0.00           O  
ATOM   4522  CB  TRP   593      91.371 109.884  65.343  0.00  0.00           C  
ATOM   4523  CG  TRP   593      92.794 110.185  64.914  0.00  0.00           C  
ATOM   4524  CD1 TRP   593      93.467 111.352  65.190  0.00  0.00           C  
ATOM   4525  CD2 TRP   593      93.488 109.486  63.842  0.00  0.00           C  
ATOM   4526  CE2 TRP   593      94.675 110.229  63.603  0.00  0.00           C  
ATOM   4527  CE3 TRP   593      93.370 108.315  63.126  0.00  0.00           C  
ATOM   4528  NE1 TRP   593      94.653 111.292  64.537  0.00  0.00           N  
ATOM   4529  CZ2 TRP   593      95.669 109.934  62.548  0.00  0.00           C  
ATOM   4530  CZ3 TRP   593      94.270 108.045  62.086  0.00  0.00           C  
ATOM   4531  CH2 TRP   593      95.418 108.790  61.755  0.00  0.00           C  
ATOM   4532  N   PHE   594      88.916 109.008  63.483  0.00  0.00           N  
ATOM   4533  CA  PHE   594      87.826 108.084  63.233  0.00  0.00           C  
ATOM   4534  C   PHE   594      88.347 106.673  63.010  0.00  0.00           C  
ATOM   4535  O   PHE   594      89.450 106.512  62.430  0.00  0.00           O  
ATOM   4536  CB  PHE   594      86.985 108.510  62.072  0.00  0.00           C  
ATOM   4537  CG  PHE   594      86.149 109.720  62.382  0.00  0.00           C  
ATOM   4538  CD1 PHE   594      86.403 111.045  61.900  0.00  0.00           C  
ATOM   4539  CD2 PHE   594      84.977 109.509  63.187  0.00  0.00           C  
ATOM   4540  CE1 PHE   594      85.446 112.118  62.073  0.00  0.00           C  
ATOM   4541  CE2 PHE   594      84.112 110.574  63.499  0.00  0.00           C  
ATOM   4542  CZ  PHE   594      84.311 111.837  62.897  0.00  0.00           C  
ATOM   4543  N   CYS   595      87.594 105.677  63.529  0.00  0.00           N  
ATOM   4544  CA  CYS   595      87.890 104.290  63.261  0.00  0.00           C  
ATOM   4545  C   CYS   595      86.722 103.493  62.752  0.00  0.00           C  
ATOM   4546  O   CYS   595      85.607 103.496  63.272  0.00  0.00           O  
ATOM   4547  CB  CYS   595      88.317 103.719  64.562  0.00  0.00           C  
ATOM   4548  SG  CYS   595      87.127 103.759  65.921  0.00  0.00           S  
ATOM   4549  N   GLY   596      87.051 102.651  61.755  0.00  0.00           N  
ATOM   4550  CA  GLY   596      86.010 101.898  61.085  0.00  0.00           C  
ATOM   4551  C   GLY   596      86.426 101.300  59.760  0.00  0.00           C  
ATOM   4552  O   GLY   596      87.562 100.811  59.663  0.00  0.00           O  
ATOM   4553  N   GLN   597      85.547 101.105  58.753  0.00  0.00           N  
ATOM   4554  CA  GLN   597      85.865 100.296  57.608  0.00  0.00           C  
ATOM   4555  C   GLN   597      86.957 100.901  56.636  0.00  0.00           C  
ATOM   4556  O   GLN   597      86.967 102.098  56.479  0.00  0.00           O  
ATOM   4557  CB  GLN   597      84.600  99.921  56.791  0.00  0.00           C  
ATOM   4558  CG  GLN   597      83.755  98.696  57.363  0.00  0.00           C  
ATOM   4559  CD  GLN   597      82.419  98.412  56.729  0.00  0.00           C  
ATOM   4560  NE2 GLN   597      81.930  97.176  56.894  0.00  0.00           N  
ATOM   4561  OE1 GLN   597      81.861  99.346  56.074  0.00  0.00           O  
ATOM   4562  N   PRO   598      87.762 100.120  55.915  0.00  0.00           N  
ATOM   4563  CA  PRO   598      88.657 100.543  54.835  0.00  0.00           C  
ATOM   4564  C   PRO   598      88.345 101.901  54.115  0.00  0.00           C  
ATOM   4565  O   PRO   598      87.276 101.960  53.469  0.00  0.00           O  
ATOM   4566  CB  PRO   598      88.673  99.316  53.943  0.00  0.00           C  
ATOM   4567  CG  PRO   598      88.817  98.205  54.936  0.00  0.00           C  
ATOM   4568  CD  PRO   598      87.719  98.609  55.905  0.00  0.00           C  
ATOM   4569  N   VAL   599      89.199 102.905  54.193  0.00  0.00           N  
ATOM   4570  CA  VAL   599      89.294 104.077  53.318  0.00  0.00           C  
ATOM   4571  C   VAL   599      90.760 104.327  52.756  0.00  0.00           C  
ATOM   4572  O   VAL   599      91.740 103.988  53.425  0.00  0.00           O  
ATOM   4573  CB  VAL   599      88.810 105.331  54.054  0.00  0.00           C  
ATOM   4574  CG1 VAL   599      87.382 105.122  54.568  0.00  0.00           C  
ATOM   4575  CG2 VAL   599      89.776 105.792  55.184  0.00  0.00           C  
ATOM   4576  N   THR   600      90.960 104.974  51.630  0.00  0.00           N  
ATOM   4577  CA  THR   600      92.262 105.589  51.076  0.00  0.00           C  
ATOM   4578  C   THR   600      92.094 107.019  51.272  0.00  0.00           C  
ATOM   4579  O   THR   600      91.002 107.587  51.356  0.00  0.00           O  
ATOM   4580  CB  THR   600      92.443 105.164  49.530  0.00  0.00           C  
ATOM   4581  CG2 THR   600      92.976 103.728  49.450  0.00  0.00           C  
ATOM   4582  OG1 THR   600      91.179 105.157  48.851  0.00  0.00           O  
ATOM   4583  N   ARG   601      93.250 107.710  51.399  0.00  0.00           N  
ATOM   4584  CA  ARG   601      93.368 109.173  51.460  0.00  0.00           C  
ATOM   4585  C   ARG   601      93.195 109.903  50.127  0.00  0.00           C  
ATOM   4586  O   ARG   601      93.934 109.580  49.207  0.00  0.00           O  
ATOM   4587  CB  ARG   601      94.803 109.529  51.958  0.00  0.00           C  
ATOM   4588  CG  ARG   601      95.172 111.058  51.974  0.00  0.00           C  
ATOM   4589  CD  ARG   601      94.279 111.886  52.986  0.00  0.00           C  
ATOM   4590  NE  ARG   601      94.302 111.372  54.341  0.00  0.00           N  
ATOM   4591  CZ  ARG   601      93.414 111.834  55.239  0.00  0.00           C  
ATOM   4592  NH1 ARG   601      92.526 112.788  55.015  0.00  0.00           N1+
ATOM   4593  NH2 ARG   601      93.331 111.262  56.416  0.00  0.00           N  
ATOM   4594  N   THR   602      92.273 110.837  50.096  0.00  0.00           N  
ATOM   4595  CA  THR   602      91.963 111.629  48.927  0.00  0.00           C  
ATOM   4596  C   THR   602      92.535 113.037  48.937  0.00  0.00           C  
ATOM   4597  O   THR   602      93.173 113.382  47.935  0.00  0.00           O  
ATOM   4598  CB  THR   602      90.469 111.663  48.469  0.00  0.00           C  
ATOM   4599  CG2 THR   602      90.373 111.732  46.926  0.00  0.00           C  
ATOM   4600  OG1 THR   602      89.664 110.602  48.795  0.00  0.00           O  
ATOM   4601  N   ASP   603      92.404 113.812  50.048  0.00  0.00           N  
ATOM   4602  CA  ASP   603      93.146 115.023  50.274  0.00  0.00           C  
ATOM   4603  C   ASP   603      93.251 115.454  51.744  0.00  0.00           C  
ATOM   4604  O   ASP   603      92.834 114.647  52.610  0.00  0.00           O  
ATOM   4605  CB  ASP   603      92.798 116.109  49.403  0.00  0.00           C  
ATOM   4606  CG  ASP   603      91.298 116.465  49.433  0.00  0.00           C  
ATOM   4607  OD1 ASP   603      90.909 116.983  50.520  0.00  0.00           O  
ATOM   4608  OD2 ASP   603      90.493 116.048  48.494  0.00  0.00           O1-
ATOM   4609  N   ASP   604      93.815 116.639  52.082  0.00  0.00           N  
ATOM   4610  CA  ASP   604      94.088 117.033  53.489  0.00  0.00           C  
ATOM   4611  C   ASP   604      93.071 116.727  54.574  0.00  0.00           C  
ATOM   4612  O   ASP   604      93.499 116.247  55.615  0.00  0.00           O  
ATOM   4613  CB  ASP   604      94.348 118.579  53.552  0.00  0.00           C  
ATOM   4614  CG  ASP   604      95.610 119.163  53.001  0.00  0.00           C  
ATOM   4615  OD1 ASP   604      96.493 118.437  52.555  0.00  0.00           O  
ATOM   4616  OD2 ASP   604      95.808 120.380  52.966  0.00  0.00           O1-
ATOM   4617  N   ASP   605      91.791 116.837  54.183  0.00  0.00           N  
ATOM   4618  CA  ASP   605      90.659 116.319  54.877  0.00  0.00           C  
ATOM   4619  C   ASP   605      90.089 115.027  54.386  0.00  0.00           C  
ATOM   4620  O   ASP   605      89.717 114.153  55.123  0.00  0.00           O  
ATOM   4621  CB  ASP   605      89.580 117.380  54.982  0.00  0.00           C  
ATOM   4622  CG  ASP   605      89.574 118.231  56.217  0.00  0.00           C  
ATOM   4623  OD1 ASP   605      90.246 117.854  57.174  0.00  0.00           O  
ATOM   4624  OD2 ASP   605      88.889 119.231  56.255  0.00  0.00           O1-
ATOM   4625  N   THR   606      90.010 114.868  53.045  0.00  0.00           N  
ATOM   4626  CA  THR   606      89.122 113.881  52.324  0.00  0.00           C  
ATOM   4627  C   THR   606      89.665 112.465  52.345  0.00  0.00           C  
ATOM   4628  O   THR   606      90.865 112.245  52.222  0.00  0.00           O  
ATOM   4629  CB  THR   606      88.715 114.403  50.866  0.00  0.00           C  
ATOM   4630  CG2 THR   606      87.557 113.658  50.175  0.00  0.00           C  
ATOM   4631  OG1 THR   606      88.589 115.799  50.985  0.00  0.00           O  
ATOM   4632  N   VAL   607      88.808 111.404  52.469  0.00  0.00           N  
ATOM   4633  CA  VAL   607      89.060 109.984  52.268  0.00  0.00           C  
ATOM   4634  C   VAL   607      87.925 109.346  51.444  0.00  0.00           C  
ATOM   4635  O   VAL   607      86.819 109.890  51.426  0.00  0.00           O  
ATOM   4636  CB  VAL   607      89.186 109.266  53.633  0.00  0.00           C  
ATOM   4637  CG1 VAL   607      90.122 109.977  54.666  0.00  0.00           C  
ATOM   4638  CG2 VAL   607      87.799 109.128  54.327  0.00  0.00           C  
ATOM   4639  N   ALA   608      88.220 108.279  50.722  0.00  0.00           N  
ATOM   4640  CA  ALA   608      87.205 107.527  49.960  0.00  0.00           C  
ATOM   4641  C   ALA   608      87.263 106.000  50.182  0.00  0.00           C  
ATOM   4642  O   ALA   608      88.273 105.495  50.663  0.00  0.00           O  
ATOM   4643  CB  ALA   608      87.253 107.882  48.455  0.00  0.00           C  
ATOM   4644  N   ASP   609      86.164 105.317  49.846  0.00  0.00           N  
ATOM   4645  CA  ASP   609      85.929 103.866  50.148  0.00  0.00           C  
ATOM   4646  C   ASP   609      86.944 102.891  49.571  0.00  0.00           C  
ATOM   4647  O   ASP   609      87.105 102.866  48.373  0.00  0.00           O  
ATOM   4648  CB  ASP   609      84.519 103.565  49.558  0.00  0.00           C  
ATOM   4649  CG  ASP   609      84.128 102.132  49.642  0.00  0.00           C  
ATOM   4650  OD1 ASP   609      84.746 101.377  50.477  0.00  0.00           O  
ATOM   4651  OD2 ASP   609      83.051 101.695  49.059  0.00  0.00           O1-
ATOM   4652  N   ALA   610      87.663 102.122  50.426  0.00  0.00           N  
ATOM   4653  CA  ALA   610      88.601 101.044  49.991  0.00  0.00           C  
ATOM   4654  C   ALA   610      88.140  99.606  50.230  0.00  0.00           C  
ATOM   4655  O   ALA   610      88.892  98.629  50.425  0.00  0.00           O  
ATOM   4656  CB  ALA   610      89.962 101.367  50.634  0.00  0.00           C  
ATOM   4657  N   LYS   611      86.845  99.371  50.279  0.00  0.00           N  
ATOM   4658  CA  LYS   611      86.222  98.098  49.895  0.00  0.00           C  
ATOM   4659  C   LYS   611      86.870  97.395  48.706  0.00  0.00           C  
ATOM   4660  O   LYS   611      87.191  98.087  47.715  0.00  0.00           O  
ATOM   4661  CB  LYS   611      84.744  98.394  49.578  0.00  0.00           C  
ATOM   4662  CG  LYS   611      83.992  97.369  48.755  0.00  0.00           C  
ATOM   4663  CD  LYS   611      82.580  97.818  48.840  0.00  0.00           C  
ATOM   4664  CE  LYS   611      81.673  96.689  48.418  0.00  0.00           C  
ATOM   4665  NZ  LYS   611      81.615  95.721  49.488  0.00  0.00           N1+
ATOM   4666  N   ASP   612      87.078  96.063  48.764  0.00  0.00           N  
ATOM   4667  CA  ASP   612      87.494  95.249  47.649  0.00  0.00           C  
ATOM   4668  C   ASP   612      87.283  93.737  47.823  0.00  0.00           C  
ATOM   4669  O   ASP   612      87.883  92.898  47.138  0.00  0.00           O  
ATOM   4670  CB  ASP   612      88.890  95.604  47.188  0.00  0.00           C  
ATOM   4671  CG  ASP   612      89.907  95.583  48.294  0.00  0.00           C  
ATOM   4672  OD1 ASP   612      89.686  95.064  49.387  0.00  0.00           O  
ATOM   4673  OD2 ASP   612      91.021  96.111  48.066  0.00  0.00           O1-
ATOM   4674  N   GLY   613      86.344  93.387  48.680  0.00  0.00           N  
ATOM   4675  CA  GLY   613      86.166  91.993  49.198  0.00  0.00           C  
ATOM   4676  C   GLY   613      86.961  91.586  50.335  0.00  0.00           C  
ATOM   4677  O   GLY   613      86.627  90.661  51.050  0.00  0.00           O  
ATOM   4678  N   LYS   614      87.973  92.351  50.706  0.00  0.00           N  
ATOM   4679  CA  LYS   614      88.787  92.312  51.991  0.00  0.00           C  
ATOM   4680  C   LYS   614      88.242  93.110  53.225  0.00  0.00           C  
ATOM   4681  O   LYS   614      88.768  92.796  54.339  0.00  0.00           O  
ATOM   4682  CB  LYS   614      90.291  92.551  51.647  0.00  0.00           C  
ATOM   4683  CG  LYS   614      90.804  91.777  50.486  0.00  0.00           C  
ATOM   4684  CD  LYS   614      92.176  92.408  49.939  0.00  0.00           C  
ATOM   4685  CE  LYS   614      92.811  91.476  48.910  0.00  0.00           C  
ATOM   4686  NZ  LYS   614      94.133  91.916  48.407  0.00  0.00           N1+
ATOM   4687  N   GLU   615      87.282  94.011  53.105  0.00  0.00           N  
ATOM   4688  CA  GLU   615      86.700  94.774  54.232  0.00  0.00           C  
ATOM   4689  C   GLU   615      85.921  93.893  55.121  0.00  0.00           C  
ATOM   4690  O   GLU   615      85.124  93.009  54.707  0.00  0.00           O  
ATOM   4691  CB  GLU   615      85.892  95.878  53.617  0.00  0.00           C  
ATOM   4692  CG  GLU   615      84.552  95.591  52.820  0.00  0.00           C  
ATOM   4693  CD  GLU   615      84.810  94.943  51.426  0.00  0.00           C  
ATOM   4694  OE1 GLU   615      85.934  94.793  50.937  0.00  0.00           O  
ATOM   4695  OE2 GLU   615      83.788  94.446  50.960  0.00  0.00           O1-
ATOM   4696  N   ILE   616      86.167  94.018  56.407  0.00  0.00           N  
ATOM   4697  CA  ILE   616      85.381  93.372  57.509  0.00  0.00           C  
ATOM   4698  C   ILE   616      83.942  93.779  57.596  0.00  0.00           C  
ATOM   4699  O   ILE   616      83.651  94.990  57.570  0.00  0.00           O  
ATOM   4700  CB  ILE   616      86.116  93.393  58.917  0.00  0.00           C  
ATOM   4701  CG1 ILE   616      87.468  92.624  58.816  0.00  0.00           C  
ATOM   4702  CG2 ILE   616      85.221  92.992  60.044  0.00  0.00           C  
ATOM   4703  CD1 ILE   616      88.460  92.743  59.993  0.00  0.00           C  
ATOM   4704  N   ASP   617      83.050  92.813  57.648  0.00  0.00           N  
ATOM   4705  CA  ASP   617      81.633  93.125  57.800  0.00  0.00           C  
ATOM   4706  C   ASP   617      81.378  93.888  59.104  0.00  0.00           C  
ATOM   4707  O   ASP   617      81.594  93.395  60.205  0.00  0.00           O  
ATOM   4708  CB  ASP   617      80.899  91.821  57.813  0.00  0.00           C  
ATOM   4709  CG  ASP   617      79.384  91.951  57.872  0.00  0.00           C  
ATOM   4710  OD1 ASP   617      78.734  90.974  57.459  0.00  0.00           O  
ATOM   4711  OD2 ASP   617      78.807  93.020  58.213  0.00  0.00           O1-
ATOM   4712  N   THR   618      80.652  94.927  58.944  0.00  0.00           N  
ATOM   4713  CA  THR   618      80.009  95.822  59.992  0.00  0.00           C  
ATOM   4714  C   THR   618      79.502  95.169  61.256  0.00  0.00           C  
ATOM   4715  O   THR   618      79.928  95.607  62.370  0.00  0.00           O  
ATOM   4716  CB  THR   618      78.854  96.684  59.341  0.00  0.00           C  
ATOM   4717  CG2 THR   618      78.726  98.037  59.992  0.00  0.00           C  
ATOM   4718  OG1 THR   618      78.993  96.892  57.976  0.00  0.00           O  
ATOM   4719  N   LYS   619      78.858  93.980  61.118  0.00  0.00           N  
ATOM   4720  CA  LYS   619      78.333  93.113  62.192  0.00  0.00           C  
ATOM   4721  C   LYS   619      79.347  92.878  63.337  0.00  0.00           C  
ATOM   4722  O   LYS   619      78.981  92.827  64.569  0.00  0.00           O  
ATOM   4723  CB  LYS   619      77.676  91.829  61.581  0.00  0.00           C  
ATOM   4724  CG  LYS   619      78.543  90.628  61.510  0.00  0.00           C  
ATOM   4725  CD  LYS   619      77.674  89.475  60.825  0.00  0.00           C  
ATOM   4726  CE  LYS   619      78.224  88.147  61.300  0.00  0.00           C  
ATOM   4727  NZ  LYS   619      77.780  87.066  60.386  0.00  0.00           N1+
ATOM   4728  N   HIE   620      80.566  92.464  62.961  0.00  0.00           N  
ATOM   4729  CA  HIE   620      81.661  92.132  63.855  0.00  0.00           C  
ATOM   4730  C   HIE   620      82.293  93.355  64.528  0.00  0.00           C  
ATOM   4731  O   HIE   620      83.013  93.219  65.528  0.00  0.00           O  
ATOM   4732  CB  HIE   620      82.760  91.335  63.136  0.00  0.00           C  
ATOM   4733  CG  HIE   620      82.247  90.028  62.588  0.00  0.00           C  
ATOM   4734  CD2 HIE   620      81.950  89.720  61.289  0.00  0.00           C  
ATOM   4735  ND1 HIE   620      82.187  88.877  63.357  0.00  0.00           N  
ATOM   4736  CE1 HIE   620      81.734  87.951  62.474  0.00  0.00           C  
ATOM   4737  NE2 HIE   620      81.600  88.387  61.239  0.00  0.00           N  
ATOM   4738  N   LEU   621      82.148  94.548  63.986  0.00  0.00           N  
ATOM   4739  CA  LEU   621      82.717  95.826  64.551  0.00  0.00           C  
ATOM   4740  C   LEU   621      81.919  96.268  65.761  0.00  0.00           C  
ATOM   4741  O   LEU   621      80.669  96.393  65.663  0.00  0.00           O  
ATOM   4742  CB  LEU   621      82.654  96.999  63.551  0.00  0.00           C  
ATOM   4743  CG  LEU   621      83.267  96.654  62.108  0.00  0.00           C  
ATOM   4744  CD1 LEU   621      83.063  97.601  60.954  0.00  0.00           C  
ATOM   4745  CD2 LEU   621      84.742  96.199  62.206  0.00  0.00           C  
ATOM   4746  N   PRO   622      82.586  96.476  66.891  0.00  0.00           N  
ATOM   4747  CA  PRO   622      81.889  97.053  68.051  0.00  0.00           C  
ATOM   4748  C   PRO   622      81.247  98.425  67.647  0.00  0.00           C  
ATOM   4749  O   PRO   622      81.714  99.056  66.675  0.00  0.00           O  
ATOM   4750  CB  PRO   622      82.947  97.256  69.115  0.00  0.00           C  
ATOM   4751  CG  PRO   622      84.105  96.377  68.721  0.00  0.00           C  
ATOM   4752  CD  PRO   622      84.014  96.365  67.204  0.00  0.00           C  
ATOM   4753  N   SER   623      80.192  98.918  68.341  0.00  0.00           N  
ATOM   4754  CA  SER   623      79.404 100.072  67.943  0.00  0.00           C  
ATOM   4755  C   SER   623      80.181 101.397  67.927  0.00  0.00           C  
ATOM   4756  O   SER   623      79.621 102.406  67.525  0.00  0.00           O  
ATOM   4757  CB  SER   623      78.169 100.299  68.764  0.00  0.00           C  
ATOM   4758  OG  SER   623      78.613 100.587  69.996  0.00  0.00           O  
ATOM   4759  N   THR   624      81.440 101.462  68.440  0.00  0.00           N  
ATOM   4760  CA  THR   624      82.358 102.577  68.293  0.00  0.00           C  
ATOM   4761  C   THR   624      83.156 102.575  67.011  0.00  0.00           C  
ATOM   4762  O   THR   624      83.721 103.626  66.730  0.00  0.00           O  
ATOM   4763  CB  THR   624      83.343 102.608  69.487  0.00  0.00           C  
ATOM   4764  CG2 THR   624      82.588 102.759  70.768  0.00  0.00           C  
ATOM   4765  OG1 THR   624      84.235 101.526  69.577  0.00  0.00           O  
ATOM   4766  N   CYS   625      83.172 101.438  66.379  0.00  0.00           N  
ATOM   4767  CA  CYS   625      84.079 101.091  65.299  0.00  0.00           C  
ATOM   4768  C   CYS   625      83.447 100.738  63.964  0.00  0.00           C  
ATOM   4769  O   CYS   625      84.027 100.028  63.148  0.00  0.00           O  
ATOM   4770  CB  CYS   625      84.968  99.946  65.761  0.00  0.00           C  
ATOM   4771  SG  CYS   625      86.090 100.418  67.030  0.00  0.00           S  
ATOM   4772  N   ARG   626      82.207 101.213  63.791  0.00  0.00           N  
ATOM   4773  CA  ARG   626      81.388 101.004  62.629  0.00  0.00           C  
ATOM   4774  C   ARG   626      81.400 102.134  61.550  0.00  0.00           C  
ATOM   4775  O   ARG   626      80.643 102.119  60.590  0.00  0.00           O  
ATOM   4776  CB  ARG   626      79.940 100.705  63.108  0.00  0.00           C  
ATOM   4777  CG  ARG   626      79.715  99.408  63.897  0.00  0.00           C  
ATOM   4778  CD  ARG   626      78.237  99.118  64.273  0.00  0.00           C  
ATOM   4779  NE  ARG   626      78.276  97.859  65.085  0.00  0.00           N  
ATOM   4780  CZ  ARG   626      77.552  96.837  64.841  0.00  0.00           C  
ATOM   4781  NH1 ARG   626      76.470  96.884  64.125  0.00  0.00           N1+
ATOM   4782  NH2 ARG   626      77.880  95.678  65.330  0.00  0.00           N  
ATOM   4783  N   ASP   627      82.215 103.193  61.734  0.00  0.00           N  
ATOM   4784  CA  ASP   627      82.200 104.350  60.841  0.00  0.00           C  
ATOM   4785  C   ASP   627      82.563 104.181  59.390  0.00  0.00           C  
ATOM   4786  O   ASP   627      82.944 103.061  59.003  0.00  0.00           O  
ATOM   4787  CB  ASP   627      83.001 105.476  61.544  0.00  0.00           C  
ATOM   4788  CG  ASP   627      82.243 106.077  62.712  0.00  0.00           C  
ATOM   4789  OD1 ASP   627      80.988 106.013  62.678  0.00  0.00           O  
ATOM   4790  OD2 ASP   627      82.886 106.809  63.554  0.00  0.00           O1-
ATOM   4791  N   ASN   628      82.510 105.204  58.480  0.00  0.00           N  
ATOM   4792  CA  ASN   628      82.915 105.083  57.115  0.00  0.00           C  
ATOM   4793  C   ASN   628      83.448 106.452  56.588  0.00  0.00           C  
ATOM   4794  O   ASN   628      83.341 107.454  57.334  0.00  0.00           O  
ATOM   4795  CB  ASN   628      81.731 104.638  56.241  0.00  0.00           C  
ATOM   4796  CG  ASN   628      80.609 105.610  55.913  0.00  0.00           C  
ATOM   4797  ND2 ASN   628      79.580 105.087  55.222  0.00  0.00           N  
ATOM   4798  OD1 ASN   628      80.558 106.804  56.321  0.00  0.00           O  
ATOM   4799  N   PHE   629      83.950 106.525  55.342  0.00  0.00           N  
ATOM   4800  CA  PHE   629      84.534 107.668  54.646  0.00  0.00           C  
ATOM   4801  C   PHE   629      83.837 109.104  54.791  0.00  0.00           C  
ATOM   4802  O   PHE   629      84.483 110.149  54.623  0.00  0.00           O  
ATOM   4803  CB  PHE   629      84.491 107.375  53.101  0.00  0.00           C  
ATOM   4804  CG  PHE   629      83.175 106.841  52.598  0.00  0.00           C  
ATOM   4805  CD1 PHE   629      82.033 107.602  52.348  0.00  0.00           C  
ATOM   4806  CD2 PHE   629      83.011 105.486  52.584  0.00  0.00           C  
ATOM   4807  CE1 PHE   629      80.783 107.051  51.946  0.00  0.00           C  
ATOM   4808  CE2 PHE   629      81.819 104.831  52.170  0.00  0.00           C  
ATOM   4809  CZ  PHE   629      80.724 105.652  51.864  0.00  0.00           C  
ATOM   4810  N   ASP   630      82.502 109.196  54.997  0.00  0.00           N  
ATOM   4811  CA  ASP   630      81.653 110.377  55.271  0.00  0.00           C  
ATOM   4812  C   ASP   630      81.797 110.919  56.688  0.00  0.00           C  
ATOM   4813  O   ASP   630      81.561 112.100  56.835  0.00  0.00           O  
ATOM   4814  CB  ASP   630      80.090 110.029  54.878  0.00  0.00           C  
ATOM   4815  CG  ASP   630      79.962 110.082  53.345  0.00  0.00           C  
ATOM   4816  OD1 ASP   630      80.783 110.797  52.678  0.00  0.00           O  
ATOM   4817  OD2 ASP   630      78.954 109.495  52.851  0.00  0.00           O1-
ATOM   4818  N   ALA   631      82.348 110.258  57.748  0.00  0.00           N  
ATOM   4819  CA  ALA   631      82.515 110.750  59.128  0.00  0.00           C  
ATOM   4820  C   ALA   631      83.479 111.922  59.041  0.00  0.00           C  
ATOM   4821  O   ALA   631      84.555 111.865  58.488  0.00  0.00           O  
ATOM   4822  CB  ALA   631      82.971 109.524  59.986  0.00  0.00           C  
ATOM   4823  N   LYS   632      83.071 113.073  59.643  0.00  0.00           N  
ATOM   4824  CA  LYS   632      83.739 114.398  59.629  0.00  0.00           C  
ATOM   4825  C   LYS   632      83.316 115.167  60.871  0.00  0.00           C  
ATOM   4826  O   LYS   632      82.122 115.506  60.940  0.00  0.00           O  
ATOM   4827  CB  LYS   632      83.401 115.194  58.377  0.00  0.00           C  
ATOM   4828  CG  LYS   632      84.502 116.210  58.105  0.00  0.00           C  
ATOM   4829  CD  LYS   632      84.285 117.054  56.832  0.00  0.00           C  
ATOM   4830  CE  LYS   632      85.553 117.961  56.439  0.00  0.00           C  
ATOM   4831  NZ  LYS   632      85.256 118.760  55.221  0.00  0.00           N1+
ATOM   4832  OXT LYS   632      84.156 115.597  61.658  0.00  0.00           O1-
ATOM   4833  N   PHE   633      65.452  35.900  87.759  0.00  0.00           N  
ATOM   4834  CA  PHE   633      66.123  37.178  88.096  0.00  0.00           C  
ATOM   4835  C   PHE   633      65.759  38.313  87.114  0.00  0.00           C  
ATOM   4836  O   PHE   633      66.457  38.516  86.101  0.00  0.00           O  
ATOM   4837  CB  PHE   633      67.666  36.964  88.131  0.00  0.00           C  
ATOM   4838  CG  PHE   633      68.124  35.982  89.270  0.00  0.00           C  
ATOM   4839  CD1 PHE   633      68.658  34.707  88.978  0.00  0.00           C  
ATOM   4840  CD2 PHE   633      68.082  36.438  90.609  0.00  0.00           C  
ATOM   4841  CE1 PHE   633      69.002  33.847  90.060  0.00  0.00           C  
ATOM   4842  CE2 PHE   633      68.442  35.560  91.637  0.00  0.00           C  
ATOM   4843  CZ  PHE   633      68.803  34.251  91.411  0.00  0.00           C  
ATOM   4844  N   THR   634      64.572  39.012  87.244  0.00  0.00           N  
ATOM   4845  CA  THR   634      64.223  40.057  86.219  0.00  0.00           C  
ATOM   4846  C   THR   634      64.767  41.530  86.452  0.00  0.00           C  
ATOM   4847  O   THR   634      64.840  42.270  85.477  0.00  0.00           O  
ATOM   4848  CB  THR   634      62.621  40.147  85.974  0.00  0.00           C  
ATOM   4849  CG2 THR   634      62.189  40.770  84.653  0.00  0.00           C  
ATOM   4850  OG1 THR   634      62.085  38.882  86.011  0.00  0.00           O  
ATOM   4851  N   LEU   635      65.119  41.883  87.692  0.00  0.00           N  
ATOM   4852  CA  LEU   635      65.471  43.210  88.063  0.00  0.00           C  
ATOM   4853  C   LEU   635      66.989  43.456  87.905  0.00  0.00           C  
ATOM   4854  O   LEU   635      67.738  43.665  88.851  0.00  0.00           O  
ATOM   4855  CB  LEU   635      65.130  43.462  89.563  0.00  0.00           C  
ATOM   4856  CG  LEU   635      65.090  44.885  90.096  0.00  0.00           C  
ATOM   4857  CD1 LEU   635      64.544  45.890  89.037  0.00  0.00           C  
ATOM   4858  CD2 LEU   635      64.284  45.116  91.355  0.00  0.00           C  
ATOM   4859  N   ILE   636      67.356  43.473  86.610  0.00  0.00           N  
ATOM   4860  CA  ILE   636      68.712  43.853  86.003  0.00  0.00           C  
ATOM   4861  C   ILE   636      68.924  45.383  86.009  0.00  0.00           C  
ATOM   4862  O   ILE   636      70.036  45.882  86.124  0.00  0.00           O  
ATOM   4863  CB  ILE   636      68.689  43.338  84.579  0.00  0.00           C  
ATOM   4864  CG1 ILE   636      68.553  41.784  84.594  0.00  0.00           C  
ATOM   4865  CG2 ILE   636      69.930  43.757  83.725  0.00  0.00           C  
ATOM   4866  CD1 ILE   636      67.932  41.408  83.251  0.00  0.00           C  
ATOM   4867  N   GLU   637      67.843  46.129  85.907  0.00  0.00           N  
ATOM   4868  CA  GLU   637      67.920  47.489  85.281  0.00  0.00           C  
ATOM   4869  C   GLU   637      68.428  48.602  86.162  0.00  0.00           C  
ATOM   4870  O   GLU   637      68.894  49.551  85.563  0.00  0.00           O  
ATOM   4871  CB  GLU   637      66.561  47.811  84.748  0.00  0.00           C  
ATOM   4872  CG  GLU   637      65.454  47.753  85.847  0.00  0.00           C  
ATOM   4873  CD  GLU   637      64.635  46.548  85.596  0.00  0.00           C  
ATOM   4874  OE1 GLU   637      65.245  45.463  85.619  0.00  0.00           O  
ATOM   4875  OE2 GLU   637      63.424  46.599  85.258  0.00  0.00           O1-
ATOM   4876  N   LEU   638      68.414  48.494  87.520  0.00  0.00           N  
ATOM   4877  CA  LEU   638      69.107  49.448  88.426  0.00  0.00           C  
ATOM   4878  C   LEU   638      70.703  49.114  88.429  0.00  0.00           C  
ATOM   4879  O   LEU   638      71.555  50.015  88.578  0.00  0.00           O  
ATOM   4880  CB  LEU   638      68.534  49.357  89.922  0.00  0.00           C  
ATOM   4881  CG  LEU   638      69.146  50.442  90.824  0.00  0.00           C  
ATOM   4882  CD1 LEU   638      68.939  51.857  90.281  0.00  0.00           C  
ATOM   4883  CD2 LEU   638      68.607  50.340  92.307  0.00  0.00           C  
ATOM   4884  N   MET   639      71.138  47.912  88.408  0.00  0.00           N  
ATOM   4885  CA  MET   639      72.585  47.535  88.195  0.00  0.00           C  
ATOM   4886  C   MET   639      73.050  48.037  86.845  0.00  0.00           C  
ATOM   4887  O   MET   639      74.229  48.294  86.639  0.00  0.00           O  
ATOM   4888  CB  MET   639      72.859  46.007  88.376  0.00  0.00           C  
ATOM   4889  CG  MET   639      72.635  45.553  89.832  0.00  0.00           C  
ATOM   4890  SD  MET   639      73.683  46.282  91.222  0.00  0.00           S  
ATOM   4891  CE  MET   639      75.289  46.058  90.531  0.00  0.00           C  
ATOM   4892  N   ILE   640      72.204  48.218  85.877  0.00  0.00           N  
ATOM   4893  CA  ILE   640      72.521  48.935  84.595  0.00  0.00           C  
ATOM   4894  C   ILE   640      72.711  50.395  84.795  0.00  0.00           C  
ATOM   4895  O   ILE   640      73.710  50.881  84.308  0.00  0.00           O  
ATOM   4896  CB  ILE   640      71.478  48.539  83.505  0.00  0.00           C  
ATOM   4897  CG1 ILE   640      71.644  46.994  83.073  0.00  0.00           C  
ATOM   4898  CG2 ILE   640      71.309  49.436  82.275  0.00  0.00           C  
ATOM   4899  CD1 ILE   640      72.954  46.570  82.443  0.00  0.00           C  
ATOM   4900  N   VAL   641      71.913  51.077  85.622  0.00  0.00           N  
ATOM   4901  CA  VAL   641      72.259  52.522  85.982  0.00  0.00           C  
ATOM   4902  C   VAL   641      73.542  52.666  86.867  0.00  0.00           C  
ATOM   4903  O   VAL   641      74.368  53.519  86.635  0.00  0.00           O  
ATOM   4904  CB  VAL   641      70.970  53.194  86.625  0.00  0.00           C  
ATOM   4905  CG1 VAL   641      71.209  54.661  86.918  0.00  0.00           C  
ATOM   4906  CG2 VAL   641      69.758  52.981  85.699  0.00  0.00           C  
ATOM   4907  N   ILE   642      73.606  51.978  87.988  0.00  0.00           N  
ATOM   4908  CA  ILE   642      74.809  51.936  88.939  0.00  0.00           C  
ATOM   4909  C   ILE   642      76.099  51.779  88.134  0.00  0.00           C  
ATOM   4910  O   ILE   642      77.020  52.564  88.359  0.00  0.00           O  
ATOM   4911  CB  ILE   642      74.595  50.822  89.956  0.00  0.00           C  
ATOM   4912  CG1 ILE   642      73.524  51.145  91.034  0.00  0.00           C  
ATOM   4913  CG2 ILE   642      75.940  50.441  90.562  0.00  0.00           C  
ATOM   4914  CD1 ILE   642      73.250  49.979  92.039  0.00  0.00           C  
ATOM   4915  N   ALA   643      76.174  50.831  87.229  0.00  0.00           N  
ATOM   4916  CA  ALA   643      77.253  50.688  86.230  0.00  0.00           C  
ATOM   4917  C   ALA   643      77.596  51.983  85.401  0.00  0.00           C  
ATOM   4918  O   ALA   643      78.692  52.557  85.537  0.00  0.00           O  
ATOM   4919  CB  ALA   643      77.001  49.427  85.397  0.00  0.00           C  
ATOM   4920  N   ILE   644      76.630  52.491  84.616  0.00  0.00           N  
ATOM   4921  CA  ILE   644      76.764  53.662  83.803  0.00  0.00           C  
ATOM   4922  C   ILE   644      77.112  54.904  84.629  0.00  0.00           C  
ATOM   4923  O   ILE   644      78.015  55.614  84.286  0.00  0.00           O  
ATOM   4924  CB  ILE   644      75.394  53.778  83.058  0.00  0.00           C  
ATOM   4925  CG1 ILE   644      75.234  52.919  81.791  0.00  0.00           C  
ATOM   4926  CG2 ILE   644      75.137  55.238  82.681  0.00  0.00           C  
ATOM   4927  CD1 ILE   644      76.432  53.017  80.791  0.00  0.00           C  
ATOM   4928  N   VAL   645      76.643  55.123  85.806  0.00  0.00           N  
ATOM   4929  CA  VAL   645      77.134  56.225  86.671  0.00  0.00           C  
ATOM   4930  C   VAL   645      78.532  55.980  87.208  0.00  0.00           C  
ATOM   4931  O   VAL   645      79.284  56.967  87.347  0.00  0.00           O  
ATOM   4932  CB  VAL   645      76.124  56.702  87.761  0.00  0.00           C  
ATOM   4933  CG1 VAL   645      76.386  57.969  88.577  0.00  0.00           C  
ATOM   4934  CG2 VAL   645      74.746  56.874  87.174  0.00  0.00           C  
ATOM   4935  N   GLY   646      78.925  54.712  87.380  0.00  0.00           N  
ATOM   4936  CA  GLY   646      80.364  54.441  87.497  0.00  0.00           C  
ATOM   4937  C   GLY   646      81.234  54.522  86.270  0.00  0.00           C  
ATOM   4938  O   GLY   646      82.486  54.643  86.301  0.00  0.00           O
[truncated: 382,811 more chars]
