# Supplementary material for: Predicting and Interpreting the Structure of Type IV Pilus of Electricigens by Molecular Dynamics Simulations
Source: Molecules. 2017 Aug 12;22(8):1342. doi: 10.3390/molecules22081342 (PMC6152092; doi:10.3390/molecules22081342)
Supplement: Supplementary file 1 [file molecules-22-01342-s001.zip › Neisseria meningitidis 2 (NM2).pdb]

ATOM      1  N   PHE A   1       1.371  -9.889 -46.288  1.00  0.00           N  
ATOM      2  CA  PHE A   1       0.336  -8.889 -46.614  1.00  0.00           C  
ATOM      3  C   PHE A   1      -0.086  -8.812 -48.144  1.00  0.00           C  
ATOM      4  O   PHE A   1       0.611  -8.151 -48.965  1.00  0.00           O  
ATOM      5  CB  PHE A   1       0.827  -7.515 -46.156  1.00  0.00           C  
ATOM      6  CG  PHE A   1       1.016  -7.403 -44.669  1.00  0.00           C  
ATOM      7  CD1 PHE A   1       2.268  -7.577 -44.100  1.00  0.00           C  
ATOM      8  CD2 PHE A   1      -0.058  -7.125 -43.838  1.00  0.00           C  
ATOM      9  CE1 PHE A   1       2.443  -7.475 -42.733  1.00  0.00           C  
ATOM     10  CE2 PHE A   1       0.113  -7.021 -42.471  1.00  0.00           C  
ATOM     11  CZ  PHE A   1       1.366  -7.197 -41.918  1.00  0.00           C  
ATOM     12 1H   PHE A   1       1.567  -9.859 -45.308  1.00  0.00           H  
ATOM     13 2H   PHE A   1       1.045 -10.801 -46.535  1.00  0.00           H  
ATOM     14 3H   PHE A   1       2.206  -9.684 -46.800  1.00  0.00           H  
ATOM     15  HA  PHE A   1      -0.578  -9.149 -46.077  1.00  0.00           H  
ATOM     16 1HB  PHE A   1       1.778  -7.290 -46.637  1.00  0.00           H  
ATOM     17 2HB  PHE A   1       0.115  -6.752 -46.466  1.00  0.00           H  
ATOM     18  HD1 PHE A   1       3.121  -7.796 -44.744  1.00  0.00           H  
ATOM     19  HD2 PHE A   1      -1.048  -6.987 -44.275  1.00  0.00           H  
ATOM     20  HE1 PHE A   1       3.433  -7.614 -42.298  1.00  0.00           H  
ATOM     21  HE2 PHE A   1      -0.739  -6.802 -41.829  1.00  0.00           H  
ATOM     22  HZ  PHE A   1       1.502  -7.117 -40.841  1.00  0.00           H  
ATOM     23  N   THR A   2      -1.233  -9.392 -48.596  1.00  0.00           N  
ATOM     24  CA  THR A   2      -1.558  -9.469 -50.034  1.00  0.00           C  
ATOM     25  C   THR A   2      -1.710  -8.071 -50.694  1.00  0.00           C  
ATOM     26  O   THR A   2      -1.233  -7.933 -51.839  1.00  0.00           O  
ATOM     27  CB  THR A   2      -2.850 -10.279 -50.250  1.00  0.00           C  
ATOM     28  OG1 THR A   2      -2.688 -11.595 -49.705  1.00  0.00           O  
ATOM     29  CG2 THR A   2      -3.170 -10.384 -51.733  1.00  0.00           C  
ATOM     30  H   THR A   2      -1.880  -9.780 -47.925  1.00  0.00           H  
ATOM     31  HA  THR A   2      -0.739  -9.973 -50.547  1.00  0.00           H  
ATOM     32  HB  THR A   2      -3.677  -9.788 -49.739  1.00  0.00           H  
ATOM     33  HG1 THR A   2      -1.986 -12.051 -50.175  1.00  0.00           H  
ATOM     34 1HG2 THR A   2      -4.086 -10.960 -51.867  1.00  0.00           H  
ATOM     35 2HG2 THR A   2      -3.305  -9.386 -52.148  1.00  0.00           H  
ATOM     36 3HG2 THR A   2      -2.350 -10.883 -52.248  1.00  0.00           H  
ATOM     37  N   LEU A   3      -2.185  -7.070 -49.910  1.00  0.00           N  
ATOM     38  CA  LEU A   3      -2.201  -5.622 -50.420  1.00  0.00           C  
ATOM     39  C   LEU A   3      -0.854  -5.159 -51.063  1.00  0.00           C  
ATOM     40  O   LEU A   3      -0.893  -4.362 -52.007  1.00  0.00           O  
ATOM     41  CB  LEU A   3      -2.544  -4.664 -49.272  1.00  0.00           C  
ATOM     42  CG  LEU A   3      -2.757  -3.198 -49.670  1.00  0.00           C  
ATOM     43  CD1 LEU A   3      -3.911  -3.102 -50.658  1.00  0.00           C  
ATOM     44  CD2 LEU A   3      -3.033  -2.369 -48.424  1.00  0.00           C  
ATOM     45  H   LEU A   3      -2.534  -7.269 -48.983  1.00  0.00           H  
ATOM     46  HA  LEU A   3      -2.966  -5.535 -51.191  1.00  0.00           H  
ATOM     47 1HB  LEU A   3      -3.456  -5.013 -48.790  1.00  0.00           H  
ATOM     48 2HB  LEU A   3      -1.736  -4.695 -48.541  1.00  0.00           H  
ATOM     49  HG  LEU A   3      -1.862  -2.822 -50.165  1.00  0.00           H  
ATOM     50 1HD1 LEU A   3      -4.063  -2.061 -50.941  1.00  0.00           H  
ATOM     51 2HD1 LEU A   3      -3.678  -3.689 -51.547  1.00  0.00           H  
ATOM     52 3HD1 LEU A   3      -4.819  -3.488 -50.196  1.00  0.00           H  
ATOM     53 1HD2 LEU A   3      -3.184  -1.327 -48.707  1.00  0.00           H  
ATOM     54 2HD2 LEU A   3      -3.929  -2.744 -47.929  1.00  0.00           H  
ATOM     55 3HD2 LEU A   3      -2.185  -2.442 -47.743  1.00  0.00           H  
ATOM     56  N   ILE A   4       0.312  -5.731 -50.628  1.00  0.00           N  
ATOM     57  CA  ILE A   4       1.571  -5.396 -51.276  1.00  0.00           C  
ATOM     58  C   ILE A   4       1.485  -5.741 -52.770  1.00  0.00           C  
ATOM     59  O   ILE A   4       1.916  -4.883 -53.570  1.00  0.00           O  
ATOM     60  CB  ILE A   4       2.747  -6.146 -50.625  1.00  0.00           C  
ATOM     61  CG1 ILE A   4       2.983  -5.636 -49.201  1.00  0.00           C  
ATOM     62  CG2 ILE A   4       4.006  -5.992 -51.464  1.00  0.00           C  
ATOM     63  CD1 ILE A   4       3.931  -6.494 -48.394  1.00  0.00           C  
ATOM     64  H   ILE A   4       0.313  -6.386 -49.860  1.00  0.00           H  
ATOM     65  HA  ILE A   4       1.743  -4.327 -51.165  1.00  0.00           H  
ATOM     66  HB  ILE A   4       2.504  -7.205 -50.544  1.00  0.00           H  
ATOM     67 1HG1 ILE A   4       3.386  -4.624 -49.239  1.00  0.00           H  
ATOM     68 2HG1 ILE A   4       2.032  -5.588 -48.669  1.00  0.00           H  
ATOM     69 1HG2 ILE A   4       4.828  -6.527 -50.989  1.00  0.00           H  
ATOM     70 2HG2 ILE A   4       3.833  -6.401 -52.458  1.00  0.00           H  
ATOM     71 3HG2 ILE A   4       4.261  -4.935 -51.547  1.00  0.00           H  
ATOM     72 1HD1 ILE A   4       4.047  -6.068 -47.397  1.00  0.00           H  
ATOM     73 2HD1 ILE A   4       3.528  -7.504 -48.313  1.00  0.00           H  
ATOM     74 3HD1 ILE A   4       4.901  -6.528 -48.888  1.00  0.00           H  
ATOM     75  N   GLU A   5       0.835  -6.842 -53.169  1.00  0.00           N  
ATOM     76  CA  GLU A   5       0.709  -7.216 -54.554  1.00  0.00           C  
ATOM     77  C   GLU A   5       0.125  -6.109 -55.395  1.00  0.00           C  
ATOM     78  O   GLU A   5       0.771  -5.820 -56.395  1.00  0.00           O  
ATOM     79  CB  GLU A   5      -0.159  -8.470 -54.680  1.00  0.00           C  
ATOM     80  CG  GLU A   5      -0.280  -9.010 -56.098  1.00  0.00           C  
ATOM     81  CD  GLU A   5       0.998  -9.619 -56.603  1.00  0.00           C  
ATOM     82  OE1 GLU A   5       1.831  -9.960 -55.798  1.00  0.00           O  
ATOM     83  OE2 GLU A   5       1.143  -9.744 -57.797  1.00  0.00           O  
ATOM     84  H   GLU A   5       0.417  -7.429 -52.461  1.00  0.00           H  
ATOM     85  HA  GLU A   5       1.703  -7.433 -54.945  1.00  0.00           H  
ATOM     86 1HB  GLU A   5       0.253  -9.262 -54.055  1.00  0.00           H  
ATOM     87 2HB  GLU A   5      -1.164  -8.256 -54.317  1.00  0.00           H  
ATOM     88 1HG  GLU A   5      -1.064  -9.767 -56.122  1.00  0.00           H  
ATOM     89 2HG  GLU A   5      -0.576  -8.198 -56.761  1.00  0.00           H  
ATOM     90  N   LEU A   6      -0.860  -5.344 -54.901  1.00  0.00           N  
ATOM     91  CA  LEU A   6      -1.504  -4.157 -55.537  1.00  0.00           C  
ATOM     92  C   LEU A   6      -0.506  -3.036 -55.790  1.00  0.00           C  
ATOM     93  O   LEU A   6      -0.384  -2.536 -56.884  1.00  0.00           O  
ATOM     94  CB  LEU A   6      -2.640  -3.624 -54.655  1.00  0.00           C  
ATOM     95  CG  LEU A   6      -3.335  -2.353 -55.160  1.00  0.00           C  
ATOM     96  CD1 LEU A   6      -3.875  -2.593 -56.563  1.00  0.00           C  
ATOM     97  CD2 LEU A   6      -4.452  -1.970 -54.202  1.00  0.00           C  
ATOM     98  H   LEU A   6      -1.172  -5.643 -53.988  1.00  0.00           H  
ATOM     99  HA  LEU A   6      -1.922  -4.463 -56.495  1.00  0.00           H  
ATOM    100 1HB  LEU A   6      -3.398  -4.400 -54.559  1.00  0.00           H  
ATOM    101 2HB  LEU A   6      -2.240  -3.412 -53.664  1.00  0.00           H  
ATOM    102  HG  LEU A   6      -2.610  -1.541 -55.217  1.00  0.00           H  
ATOM    103 1HD1 LEU A   6      -4.369  -1.690 -56.923  1.00  0.00           H  
ATOM    104 2HD1 LEU A   6      -3.053  -2.847 -57.232  1.00  0.00           H  
ATOM    105 3HD1 LEU A   6      -4.592  -3.413 -56.542  1.00  0.00           H  
ATOM    106 1HD2 LEU A   6      -4.945  -1.066 -54.561  1.00  0.00           H  
ATOM    107 2HD2 LEU A   6      -5.178  -2.781 -54.146  1.00  0.00           H  
ATOM    108 3HD2 LEU A   6      -4.035  -1.787 -53.211  1.00  0.00           H  
ATOM    109  N   MET A   7       0.341  -2.728 -54.790  1.00  0.00           N  
ATOM    110  CA  MET A   7       1.449  -1.798 -54.922  1.00  0.00           C  
ATOM    111  C   MET A   7       2.511  -2.170 -56.013  1.00  0.00           C  
ATOM    112  O   MET A   7       2.988  -1.326 -56.777  1.00  0.00           O  
ATOM    113  CB  MET A   7       2.121  -1.660 -53.558  1.00  0.00           C  
ATOM    114  CG  MET A   7       3.287  -0.681 -53.526  1.00  0.00           C  
ATOM    115  SD  MET A   7       4.832  -1.421 -54.090  1.00  0.00           S  
ATOM    116  CE  MET A   7       5.198  -2.521 -52.726  1.00  0.00           C  
ATOM    117  H   MET A   7       0.182  -3.180 -53.901  1.00  0.00           H  
ATOM    118  HA  MET A   7       1.054  -0.832 -55.238  1.00  0.00           H  
ATOM    119 1HB  MET A   7       1.388  -1.330 -52.823  1.00  0.00           H  
ATOM    120 2HB  MET A   7       2.494  -2.633 -53.235  1.00  0.00           H  
ATOM    121 1HG  MET A   7       3.061   0.174 -54.163  1.00  0.00           H  
ATOM    122 2HG  MET A   7       3.430  -0.319 -52.508  1.00  0.00           H  
ATOM    123 1HE  MET A   7       6.129  -3.052 -52.926  1.00  0.00           H  
ATOM    124 2HE  MET A   7       5.301  -1.940 -51.808  1.00  0.00           H  
ATOM    125 3HE  MET A   7       4.387  -3.240 -52.611  1.00  0.00           H  
ATOM    126  N   ILE A   8       2.753  -3.528 -56.150  1.00  0.00           N  
ATOM    127  CA  ILE A   8       3.708  -4.099 -57.103  1.00  0.00           C  
ATOM    128  C   ILE A   8       3.166  -3.929 -58.531  1.00  0.00           C  
ATOM    129  O   ILE A   8       3.856  -3.344 -59.308  1.00  0.00           O  
ATOM    130  CB  ILE A   8       3.969  -5.588 -56.810  1.00  0.00           C  
ATOM    131  CG1 ILE A   8       4.679  -5.750 -55.463  1.00  0.00           C  
ATOM    132  CG2 ILE A   8       4.791  -6.213 -57.927  1.00  0.00           C  
ATOM    133  CD1 ILE A   8       4.731  -7.178 -54.970  1.00  0.00           C  
ATOM    134  H   ILE A   8       2.229  -4.147 -55.548  1.00  0.00           H  
ATOM    135  HA  ILE A   8       4.652  -3.562 -57.009  1.00  0.00           H  
ATOM    136  HB  ILE A   8       3.019  -6.115 -56.732  1.00  0.00           H  
ATOM    137 1HG1 ILE A   8       5.700  -5.379 -55.543  1.00  0.00           H  
ATOM    138 2HG1 ILE A   8       4.171  -5.149 -54.709  1.00  0.00           H  
ATOM    139 1HG2 ILE A   8       4.967  -7.265 -57.704  1.00  0.00           H  
ATOM    140 2HG2 ILE A   8       4.249  -6.127 -58.868  1.00  0.00           H  
ATOM    141 3HG2 ILE A   8       5.747  -5.695 -58.010  1.00  0.00           H  
ATOM    142 1HD1 ILE A   8       5.248  -7.213 -54.010  1.00  0.00           H  
ATOM    143 2HD1 ILE A   8       3.717  -7.559 -54.849  1.00  0.00           H  
ATOM    144 3HD1 ILE A   8       5.267  -7.793 -55.692  1.00  0.00           H  
ATOM    145  N   VAL A   9       1.922  -4.274 -58.818  1.00  0.00           N  
ATOM    146  CA  VAL A   9       1.341  -4.314 -60.219  1.00  0.00           C  
ATOM    147  C   VAL A   9       1.184  -2.798 -60.686  1.00  0.00           C  
ATOM    148  O   VAL A   9       1.264  -2.506 -61.880  1.00  0.00           O  
ATOM    149  CB  VAL A   9      -0.020  -5.034 -60.246  1.00  0.00           C  
ATOM    150  CG1 VAL A   9       0.130  -6.475 -59.781  1.00  0.00           C  
ATOM    151  CG2 VAL A   9      -1.018  -4.287 -59.374  1.00  0.00           C  
ATOM    152  H   VAL A   9       1.335  -4.523 -58.035  1.00  0.00           H  
ATOM    153  HA  VAL A   9       2.028  -4.863 -60.863  1.00  0.00           H  
ATOM    154  HB  VAL A   9      -0.385  -5.064 -61.273  1.00  0.00           H  
ATOM    155 1HG1 VAL A   9      -0.842  -6.969 -59.806  1.00  0.00           H  
ATOM    156 2HG1 VAL A   9       0.821  -7.000 -60.440  1.00  0.00           H  
ATOM    157 3HG1 VAL A   9       0.517  -6.490 -58.762  1.00  0.00           H  
ATOM    158 1HG2 VAL A   9      -1.979  -4.801 -59.398  1.00  0.00           H  
ATOM    159 2HG2 VAL A   9      -0.650  -4.252 -58.348  1.00  0.00           H  
ATOM    160 3HG2 VAL A   9      -1.141  -3.271 -59.750  1.00  0.00           H  
ATOM    161  N   ILE A  10       1.022  -1.845 -59.786  1.00  0.00           N  
ATOM    162  CA  ILE A  10       0.999  -0.342 -60.128  1.00  0.00           C  
ATOM    163  C   ILE A  10       2.437   0.324 -60.155  1.00  0.00           C  
ATOM    164  O   ILE A  10       2.674   1.255 -60.944  1.00  0.00           O  
ATOM    165  CB  ILE A  10       0.123   0.429 -59.123  1.00  0.00           C  
ATOM    166  CG1 ILE A  10       0.769   0.422 -57.735  1.00  0.00           C  
ATOM    167  CG2 ILE A  10      -1.274  -0.171 -59.066  1.00  0.00           C  
ATOM    168  CD1 ILE A  10       0.100   1.347 -56.745  1.00  0.00           C  
ATOM    169  H   ILE A  10       0.908  -2.133 -58.825  1.00  0.00           H  
ATOM    170  HA  ILE A  10       0.574  -0.220 -61.123  1.00  0.00           H  
ATOM    171  HB  ILE A  10       0.048   1.471 -59.430  1.00  0.00           H  
ATOM    172 1HG1 ILE A  10       0.746  -0.589 -57.329  1.00  0.00           H  
ATOM    173 2HG1 ILE A  10       1.816   0.715 -57.820  1.00  0.00           H  
ATOM    174 1HG2 ILE A  10      -1.880   0.385 -58.351  1.00  0.00           H  
ATOM    175 2HG2 ILE A  10      -1.734  -0.115 -60.051  1.00  0.00           H  
ATOM    176 3HG2 ILE A  10      -1.210  -1.214 -58.754  1.00  0.00           H  
ATOM    177 1HD1 ILE A  10       0.614   1.287 -55.786  1.00  0.00           H  
ATOM    178 2HD1 ILE A  10       0.143   2.371 -57.117  1.00  0.00           H  
ATOM    179 3HD1 ILE A  10      -0.940   1.050 -56.617  1.00  0.00           H  
ATOM    180  N   ALA A  11       3.446  -0.256 -59.522  1.00  0.00           N  
ATOM    181  CA  ALA A  11       4.868   0.127 -59.624  1.00  0.00           C  
ATOM    182  C   ALA A  11       5.364  -0.136 -61.037  1.00  0.00           C  
ATOM    183  O   ALA A  11       6.298   0.533 -61.392  1.00  0.00           O  
ATOM    184  CB  ALA A  11       5.747  -0.641 -58.643  1.00  0.00           C  
ATOM    185  H   ALA A  11       3.186  -1.026 -58.923  1.00  0.00           H  
ATOM    186  HA  ALA A  11       4.947   1.193 -59.412  1.00  0.00           H  
ATOM    187 1HB  ALA A  11       6.783  -0.324 -58.757  1.00  0.00           H  
ATOM    188 2HB  ALA A  11       5.416  -0.440 -57.624  1.00  0.00           H  
ATOM    189 3HB  ALA A  11       5.670  -1.708 -58.845  1.00  0.00           H  
ATOM    190  N   ILE A  12       4.772  -1.023 -61.868  1.00  0.00           N  
ATOM    191  CA  ILE A  12       5.219  -1.300 -63.228  1.00  0.00           C  
ATOM    192  C   ILE A  12       5.183  -0.037 -64.115  1.00  0.00           C  
ATOM    193  O   ILE A  12       6.217   0.280 -64.728  1.00  0.00           O  
ATOM    194  CB  ILE A  12       4.353  -2.403 -63.864  1.00  0.00           C  
ATOM    195  CG1 ILE A  12       4.597  -3.743 -63.165  1.00  0.00           C  
ATOM    196  CG2 ILE A  12       4.644  -2.515 -65.353  1.00  0.00           C  
ATOM    197  CD1 ILE A  12       3.587  -4.810 -63.521  1.00  0.00           C  
ATOM    198  H   ILE A  12       3.969  -1.516 -61.504  1.00  0.00           H  
ATOM    199  HA  ILE A  12       6.251  -1.646 -63.189  1.00  0.00           H  
ATOM    200  HB  ILE A  12       3.299  -2.163 -63.726  1.00  0.00           H  
ATOM    201 1HG1 ILE A  12       5.589  -4.112 -63.422  1.00  0.00           H  
ATOM    202 2HG1 ILE A  12       4.572  -3.599 -62.084  1.00  0.00           H  
ATOM    203 1HG2 ILE A  12       4.024  -3.300 -65.786  1.00  0.00           H  
ATOM    204 2HG2 ILE A  12       4.421  -1.566 -65.839  1.00  0.00           H  
ATOM    205 3HG2 ILE A  12       5.695  -2.761 -65.501  1.00  0.00           H  
ATOM    206 1HD1 ILE A  12       3.825  -5.730 -62.986  1.00  0.00           H  
ATOM    207 2HD1 ILE A  12       2.588  -4.475 -63.239  1.00  0.00           H  
ATOM    208 3HD1 ILE A  12       3.618  -4.996 -64.593  1.00  0.00           H  
ATOM    209  N   VAL A  13       4.095   0.722 -64.232  1.00  0.00           N  
ATOM    210  CA  VAL A  13       3.863   1.963 -64.979  1.00  0.00           C  
ATOM    211  C   VAL A  13       4.615   3.109 -64.330  1.00  0.00           C  
ATOM    212  O   VAL A  13       5.100   3.965 -65.078  1.00  0.00           O  
ATOM    213  CB  VAL A  13       2.361   2.301 -65.029  1.00  0.00           C  
ATOM    214  CG1 VAL A  13       1.896   2.861 -63.693  1.00  0.00           C  
ATOM    215  CG2 VAL A  13       2.089   3.289 -66.152  1.00  0.00           C  
ATOM    216  H   VAL A  13       3.339   0.322 -63.695  1.00  0.00           H  
ATOM    217  HA  VAL A  13       4.220   1.825 -66.000  1.00  0.00           H  
ATOM    218  HB  VAL A  13       1.798   1.384 -65.206  1.00  0.00           H  
ATOM    219 1HG1 VAL A  13       0.832   3.094 -63.746  1.00  0.00           H  
ATOM    220 2HG1 VAL A  13       2.067   2.123 -62.909  1.00  0.00           H  
ATOM    221 3HG1 VAL A  13       2.454   3.769 -63.465  1.00  0.00           H  
ATOM    222 1HG2 VAL A  13       1.026   3.523 -66.182  1.00  0.00           H  
ATOM    223 2HG2 VAL A  13       2.657   4.204 -65.978  1.00  0.00           H  
ATOM    224 3HG2 VAL A  13       2.391   2.851 -67.104  1.00  0.00           H  
ATOM    225  N   GLY A  14       4.878   3.129 -63.048  1.00  0.00           N  
ATOM    226  CA  GLY A  14       5.767   4.120 -62.404  1.00  0.00           C  
ATOM    227  C   GLY A  14       7.166   3.971 -62.831  1.00  0.00           C  
ATOM    228  O   GLY A  14       7.921   4.943 -63.086  1.00  0.00           O  
ATOM    229  H   GLY A  14       4.439   2.419 -62.479  1.00  0.00           H  
ATOM    230 1HA  GLY A  14       5.424   5.127 -62.644  1.00  0.00           H  
ATOM    231 2HA  GLY A  14       5.710   4.011 -61.321  1.00  0.00           H  
ATOM    232  N   ILE A  15       7.602   2.702 -62.965  1.00  0.00           N  
ATOM    233  CA  ILE A  15       8.978   2.321 -63.549  1.00  0.00           C  
ATOM    234  C   ILE A  15       9.054   2.631 -65.090  1.00  0.00           C  
ATOM    235  O   ILE A  15       9.970   3.382 -65.474  1.00  0.00           O  
ATOM    236  CB  ILE A  15       9.290   0.830 -63.324  1.00  0.00           C  
ATOM    237  CG1 ILE A  15       9.478   0.543 -61.832  1.00  0.00           C  
ATOM    238  CG2 ILE A  15      10.527   0.421 -64.108  1.00  0.00           C  
ATOM    239  CD1 ILE A  15       9.485  -0.929 -61.490  1.00  0.00           C  
ATOM    240  H   ILE A  15       6.977   1.969 -62.660  1.00  0.00           H  
ATOM    241  HA  ILE A  15       9.743   2.909 -63.043  1.00  0.00           H  
ATOM    242  HB  ILE A  15       8.445   0.227 -63.657  1.00  0.00           H  
ATOM    243 1HG1 ILE A  15      10.418   0.977 -61.494  1.00  0.00           H  
ATOM    244 2HG1 ILE A  15       8.677   1.020 -61.266  1.00  0.00           H  
ATOM    245 1HG2 ILE A  15      10.734  -0.635 -63.937  1.00  0.00           H  
ATOM    246 2HG2 ILE A  15      10.357   0.590 -65.170  1.00  0.00           H  
ATOM    247 3HG2 ILE A  15      11.380   1.016 -63.778  1.00  0.00           H  
ATOM    248 1HD1 ILE A  15       9.622  -1.053 -60.415  1.00  0.00           H  
ATOM    249 2HD1 ILE A  15       8.536  -1.377 -61.788  1.00  0.00           H  
ATOM    250 3HD1 ILE A  15      10.301  -1.422 -62.017  1.00  0.00           H  
ATOM    251  N   LEU A  16       8.037   2.279 -65.877  1.00  0.00           N  
ATOM    252  CA  LEU A  16       8.026   2.406 -67.315  1.00  0.00           C  
ATOM    253  C   LEU A  16       7.610   3.872 -67.715  1.00  0.00           C  
ATOM    254  O   LEU A  16       7.445   4.191 -68.893  1.00  0.00           O  
ATOM    255  CB  LEU A  16       7.063   1.376 -67.918  1.00  0.00           C  
ATOM    256  CG  LEU A  16       7.435  -0.095 -67.692  1.00  0.00           C  
ATOM    257  CD1 LEU A  16       6.346  -0.989 -68.270  1.00  0.00           C  
ATOM    258  CD2 LEU A  16       8.781  -0.383 -68.341  1.00  0.00           C  
ATOM    259  H   LEU A  16       7.226   1.899 -65.411  1.00  0.00           H  
ATOM    260  HA  LEU A  16       9.032   2.212 -67.686  1.00  0.00           H  
ATOM    261 1HB  LEU A  16       6.073   1.536 -67.493  1.00  0.00           H  
ATOM    262 2HB  LEU A  16       7.005   1.542 -68.993  1.00  0.00           H  
ATOM    263  HG  LEU A  16       7.498  -0.295 -66.622  1.00  0.00           H  
ATOM    264 1HD1 LEU A  16       6.611  -2.034 -68.109  1.00  0.00           H  
ATOM    265 2HD1 LEU A  16       5.399  -0.775 -67.774  1.00  0.00           H  
ATOM    266 3HD1 LEU A  16       6.248  -0.800 -69.338  1.00  0.00           H  
ATOM    267 1HD2 LEU A  16       9.046  -1.429 -68.180  1.00  0.00           H  
ATOM    268 2HD2 LEU A  16       8.718  -0.185 -69.412  1.00  0.00           H  
ATOM    269 3HD2 LEU A  16       9.543   0.257 -67.898  1.00  0.00           H  
ATOM    270  N   ALA A  17       7.429   4.715 -66.707  1.00  0.00           N  
ATOM    271  CA  ALA A  17       7.270   6.154 -66.933  1.00  0.00           C  
ATOM    272  C   ALA A  17       8.640   6.892 -66.921  1.00  0.00           C  
ATOM    273  O   ALA A  17       8.779   8.047 -67.357  1.00  0.00           O  
ATOM    274  CB  ALA A  17       6.389   6.702 -65.784  1.00  0.00           C  
ATOM    275  H   ALA A  17       7.399   4.359 -65.762  1.00  0.00           H  
ATOM    276  HA  ALA A  17       6.832   6.295 -67.921  1.00  0.00           H  
ATOM    277 1HB  ALA A  17       6.246   7.775 -65.916  1.00  0.00           H  
ATOM    278 2HB  ALA A  17       5.420   6.202 -65.798  1.00  0.00           H  
ATOM    279 3HB  ALA A  17       6.878   6.516 -64.830  1.00  0.00           H  
ATOM    280  N   ALA A  18       9.728   6.164 -66.649  1.00  0.00           N  
ATOM    281  CA  ALA A  18      11.114   6.650 -66.598  1.00  0.00           C  
ATOM    282  C   ALA A  18      12.105   6.002 -67.572  1.00  0.00           C  
ATOM    283  O   ALA A  18      13.094   5.407 -67.193  1.00  0.00           O  
ATOM    284  CB  ALA A  18      11.620   6.600 -65.155  1.00  0.00           C  
ATOM    285  H   ALA A  18       9.542   5.188 -66.465  1.00  0.00           H  
ATOM    286  HA  ALA A  18      11.113   7.706 -66.871  1.00  0.00           H  
ATOM    287 1HB  ALA A  18      12.648   6.961 -65.116  1.00  0.00           H  
ATOM    288 2HB  ALA A  18      10.990   7.230 -64.527  1.00  0.00           H  
ATOM    289 3HB  ALA A  18      11.582   5.574 -64.792  1.00  0.00           H  
ATOM    290  N   VAL A  19      11.919   6.212 -68.886  1.00  0.00           N  
ATOM    291  CA  VAL A  19      12.726   5.800 -70.046  1.00  0.00           C  
ATOM    292  C   VAL A  19      12.965   4.378 -70.403  1.00  0.00           C  
ATOM    293  O   VAL A  19      12.843   3.976 -71.562  1.00  0.00           O  
ATOM    294  CB  VAL A  19      14.126   6.424 -69.894  1.00  0.00           C  
ATOM    295  CG1 VAL A  19      15.051   5.931 -70.996  1.00  0.00           C  
ATOM    296  CG2 VAL A  19      14.022   7.941 -69.917  1.00  0.00           C  
ATOM    297  H   VAL A  19      11.074   6.744 -69.038  1.00  0.00           H  
ATOM    298  HA  VAL A  19      12.248   6.177 -70.951  1.00  0.00           H  
ATOM    299  HB  VAL A  19      14.556   6.103 -68.946  1.00  0.00           H  
ATOM    300 1HG1 VAL A  19      16.037   6.381 -70.873  1.00  0.00           H  
ATOM    301 2HG1 VAL A  19      15.140   4.846 -70.939  1.00  0.00           H  
ATOM    302 3HG1 VAL A  19      14.644   6.212 -71.967  1.00  0.00           H  
ATOM    303 1HG2 VAL A  19      15.015   8.376 -69.808  1.00  0.00           H  
ATOM    304 2HG2 VAL A  19      13.586   8.262 -70.863  1.00  0.00           H  
ATOM    305 3HG2 VAL A  19      13.388   8.275 -69.095  1.00  0.00           H  
ATOM    306  N   ALA A  20      13.308   3.472 -69.437  1.00  0.00           N  
ATOM    307  CA  ALA A  20      13.631   2.089 -69.662  1.00  0.00           C  
ATOM    308  C   ALA A  20      12.418   1.179 -70.096  1.00  0.00           C  
ATOM    309  O   ALA A  20      11.972   0.358 -69.333  1.00  0.00           O  
ATOM    310  CB  ALA A  20      14.361   1.585 -68.395  1.00  0.00           C  
ATOM    311  H   ALA A  20      13.329   3.836 -68.495  1.00  0.00           H  
ATOM    312  HA  ALA A  20      14.333   2.035 -70.494  1.00  0.00           H  
ATOM    313 1HB  ALA A  20      14.626   0.535 -68.521  1.00  0.00           H  
ATOM    314 2HB  ALA A  20      15.267   2.171 -68.240  1.00  0.00           H  
ATOM    315 3HB  ALA A  20      13.707   1.693 -67.531  1.00  0.00           H  
ATOM    316  N   LEU A  21      11.784   1.451 -71.225  1.00  0.00           N  
ATOM    317  CA  LEU A  21      10.648   0.687 -71.817  1.00  0.00           C  
ATOM    318  C   LEU A  21      11.247  -0.486 -72.665  1.00  0.00           C  
ATOM    319  O   LEU A  21      12.050  -0.268 -73.586  1.00  0.00           O  
ATOM    320  CB  LEU A  21       9.771   1.593 -72.690  1.00  0.00           C  
ATOM    321  CG  LEU A  21       8.809   2.517 -71.932  1.00  0.00           C  
ATOM    322  CD1 LEU A  21       9.604   3.598 -71.213  1.00  0.00           C  
ATOM    323  CD2 LEU A  21       7.816   3.127 -72.910  1.00  0.00           C  
ATOM    324  H   LEU A  21      12.133   2.267 -71.708  1.00  0.00           H  
ATOM    325  HA  LEU A  21      10.036   0.294 -71.006  1.00  0.00           H  
ATOM    326 1HB  LEU A  21      10.418   2.219 -73.302  1.00  0.00           H  
ATOM    327 2HB  LEU A  21       9.175   0.965 -73.352  1.00  0.00           H  
ATOM    328  HG  LEU A  21       8.270   1.942 -71.179  1.00  0.00           H  
ATOM    329 1HD1 LEU A  21       8.920   4.255 -70.675  1.00  0.00           H  
ATOM    330 2HD1 LEU A  21      10.292   3.135 -70.506  1.00  0.00           H  
ATOM    331 3HD1 LEU A  21      10.167   4.180 -71.941  1.00  0.00           H  
ATOM    332 1HD2 LEU A  21       7.131   3.784 -72.371  1.00  0.00           H  
ATOM    333 2HD2 LEU A  21       8.354   3.703 -73.663  1.00  0.00           H  
ATOM    334 3HD2 LEU A  21       7.249   2.333 -73.397  1.00  0.00           H  
ATOM    335  N   PRO A  22      11.023  -1.745 -72.267  1.00  0.00           N  
ATOM    336  CA  PRO A  22      11.567  -2.987 -72.950  1.00  0.00           C  
ATOM    337  C   PRO A  22      11.452  -3.095 -74.491  1.00  0.00           C  
ATOM    338  O   PRO A  22      10.350  -3.207 -75.098  1.00  0.00           O  
ATOM    339  CB  PRO A  22      10.734  -4.091 -72.292  1.00  0.00           C  
ATOM    340  CG  PRO A  22      10.438  -3.562 -70.929  1.00  0.00           C  
ATOM    341  CD  PRO A  22      10.147  -2.102 -71.149  1.00  0.00           C  
ATOM    342  HA  PRO A  22      12.636  -3.090 -72.714  1.00  0.00           H  
ATOM    343 1HB  PRO A  22       9.825  -4.280 -72.882  1.00  0.00           H  
ATOM    344 2HB  PRO A  22      11.304  -5.031 -72.270  1.00  0.00           H  
ATOM    345 1HG  PRO A  22       9.587  -4.102 -70.489  1.00  0.00           H  
ATOM    346 2HG  PRO A  22      11.298  -3.727 -70.263  1.00  0.00           H  
ATOM    347 1HD  PRO A  22       9.086  -1.974 -71.409  1.00  0.00           H  
ATOM    348 2HD  PRO A  22      10.394  -1.537 -70.238  1.00  0.00           H  
ATOM    349  N   ALA A  23      12.591  -2.912 -75.071  1.00  0.00           N  
ATOM    350  CA  ALA A  23      12.787  -2.784 -76.520  1.00  0.00           C  
ATOM    351  C   ALA A  23      12.029  -1.682 -77.234  1.00  0.00           C  
ATOM    352  O   ALA A  23      11.972  -1.700 -78.503  1.00  0.00           O  
ATOM    353  CB  ALA A  23      12.575  -4.174 -77.189  1.00  0.00           C  
ATOM    354  H   ALA A  23      13.392  -2.856 -74.459  1.00  0.00           H  
ATOM    355  HA  ALA A  23      13.835  -2.545 -76.701  1.00  0.00           H  
ATOM    356 1HB  ALA A  23      12.719  -4.086 -78.266  1.00  0.00           H  
ATOM    357 2HB  ALA A  23      13.294  -4.886 -76.784  1.00  0.00           H  
ATOM    358 3HB  ALA A  23      11.564  -4.525 -76.986  1.00  0.00           H  
ATOM    359  N   TYR A  24      11.522  -0.691 -76.551  1.00  0.00           N  
ATOM    360  CA  TYR A  24      10.792   0.416 -77.138  1.00  0.00           C  
ATOM    361  C   TYR A  24      11.624   1.289 -78.088  1.00  0.00           C  
ATOM    362  O   TYR A  24      11.264   1.448 -79.250  1.00  0.00           O  
ATOM    363  CB  TYR A  24      10.204   1.281 -76.021  1.00  0.00           C  
ATOM    364  CG  TYR A  24       9.491   2.519 -76.518  1.00  0.00           C  
ATOM    365  CD1 TYR A  24       8.174   2.435 -76.946  1.00  0.00           C  
ATOM    366  CD2 TYR A  24      10.153   3.736 -76.546  1.00  0.00           C  
ATOM    367  CE1 TYR A  24       7.522   3.566 -77.400  1.00  0.00           C  
ATOM    368  CE2 TYR A  24       9.502   4.867 -77.001  1.00  0.00           C  
ATOM    369  CZ  TYR A  24       8.192   4.784 -77.426  1.00  0.00           C  
ATOM    370  OH  TYR A  24       7.543   5.910 -77.879  1.00  0.00           O  
ATOM    371  H   TYR A  24      11.658  -0.715 -75.551  1.00  0.00           H  
ATOM    372  HA  TYR A  24       9.981   0.013 -77.745  1.00  0.00           H  
ATOM    373 1HB  TYR A  24       9.495   0.690 -75.438  1.00  0.00           H  
ATOM    374 2HB  TYR A  24      11.000   1.595 -75.346  1.00  0.00           H  
ATOM    375  HD1 TYR A  24       7.653   1.478 -76.924  1.00  0.00           H  
ATOM    376  HD2 TYR A  24      11.189   3.802 -76.211  1.00  0.00           H  
ATOM    377  HE1 TYR A  24       6.488   3.501 -77.736  1.00  0.00           H  
ATOM    378  HE2 TYR A  24      10.023   5.824 -77.024  1.00  0.00           H  
ATOM    379  HH  TYR A  24       8.152   6.653 -77.871  1.00  0.00           H  
ATOM    380  N   GLN A  25      12.772   1.754 -77.622  1.00  0.00           N  
ATOM    381  CA  GLN A  25      13.800   2.643 -78.288  1.00  0.00           C  
ATOM    382  C   GLN A  25      14.235   1.853 -79.465  1.00  0.00           C  
ATOM    383  O   GLN A  25      14.459   2.470 -80.471  1.00  0.00           O  
ATOM    384  CB  GLN A  25      14.996   2.980 -77.393  1.00  0.00           C  
ATOM    385  CG  GLN A  25      15.989   3.944 -78.019  1.00  0.00           C  
ATOM    386  CD  GLN A  25      17.030   4.428 -77.028  1.00  0.00           C  
ATOM    387  OE1 GLN A  25      16.765   4.526 -75.826  1.00  0.00           O  
ATOM    388  NE2 GLN A  25      18.223   4.734 -77.525  1.00  0.00           N  
ATOM    389  H   GLN A  25      12.935   1.437 -76.677  1.00  0.00           H  
ATOM    390  HA  GLN A  25      13.322   3.586 -78.552  1.00  0.00           H  
ATOM    391 1HB  GLN A  25      14.640   3.422 -76.462  1.00  0.00           H  
ATOM    392 2HB  GLN A  25      15.530   2.065 -77.139  1.00  0.00           H  
ATOM    393 1HG  GLN A  25      16.504   3.439 -78.836  1.00  0.00           H  
ATOM    394 2HG  GLN A  25      15.448   4.812 -78.398  1.00  0.00           H  
ATOM    395 1HE2 GLN A  25      18.950   5.059 -76.919  1.00  0.00           H  
ATOM    396 2HE2 GLN A  25      18.395   4.640 -78.506  1.00  0.00           H  
ATOM    397  N   ASP A  26      14.462   0.519 -79.337  1.00  0.00           N  
ATOM    398  CA  ASP A  26      14.905  -0.378 -80.399  1.00  0.00           C  
ATOM    399  C   ASP A  26      14.021  -0.379 -81.582  1.00  0.00           C  
ATOM    400  O   ASP A  26      14.501  -0.228 -82.718  1.00  0.00           O  
ATOM    401  CB  ASP A  26      15.014  -1.814 -79.878  1.00  0.00           C  
ATOM    402  CG  ASP A  26      16.178  -2.008 -78.916  1.00  0.00           C  
ATOM    403  OD1 ASP A  26      16.982  -1.114 -78.798  1.00  0.00           O  
ATOM    404  OD2 ASP A  26      16.252  -3.049 -78.308  1.00  0.00           O  
ATOM    405  H   ASP A  26      14.300   0.145 -78.413  1.00  0.00           H  
ATOM    406  HA  ASP A  26      15.890  -0.055 -80.736  1.00  0.00           H  
ATOM    407 1HB  ASP A  26      14.090  -2.087 -79.368  1.00  0.00           H  
ATOM    408 2HB  ASP A  26      15.138  -2.497 -80.719  1.00  0.00           H  
ATOM    409  N   TYR A  27      12.688  -0.520 -81.408  1.00  0.00           N  
ATOM    410  CA  TYR A  27      11.684  -0.488 -82.507  1.00  0.00           C  
ATOM    411  C   TYR A  27      11.277   0.927 -82.977  1.00  0.00           C  
ATOM    412  O   TYR A  27      10.914   1.038 -84.154  1.00  0.00           O  
ATOM    413  CB  TYR A  27      10.431  -1.254 -82.078  1.00  0.00           C  
ATOM    414  CG  TYR A  27      10.568  -2.756 -82.183  1.00  0.00           C  
ATOM    415  CD1 TYR A  27      11.002  -3.491 -81.089  1.00  0.00           C  
ATOM    416  CD2 TYR A  27      10.261  -3.400 -83.372  1.00  0.00           C  
ATOM    417  CE1 TYR A  27      11.127  -4.864 -81.185  1.00  0.00           C  
ATOM    418  CE2 TYR A  27      10.386  -4.772 -83.468  1.00  0.00           C  
ATOM    419  CZ  TYR A  27      10.817  -5.503 -82.380  1.00  0.00           C  
ATOM    420  OH  TYR A  27      10.942  -6.870 -82.475  1.00  0.00           O  
ATOM    421  H   TYR A  27      12.373  -0.656 -80.458  1.00  0.00           H  
ATOM    422  HA  TYR A  27      12.115  -0.971 -83.384  1.00  0.00           H  
ATOM    423 1HB  TYR A  27      10.188  -1.005 -81.044  1.00  0.00           H  
ATOM    424 2HB  TYR A  27       9.587  -0.946 -82.695  1.00  0.00           H  
ATOM    425  HD1 TYR A  27      11.243  -2.986 -80.154  1.00  0.00           H  
ATOM    426  HD2 TYR A  27       9.921  -2.822 -84.232  1.00  0.00           H  
ATOM    427  HE1 TYR A  27      11.468  -5.441 -80.325  1.00  0.00           H  
ATOM    428  HE2 TYR A  27      10.145  -5.278 -84.403  1.00  0.00           H  
ATOM    429  HH  TYR A  27      10.993  -7.122 -83.400  1.00  0.00           H  
ATOM    430  N   THR A  28      11.364   1.974 -82.181  1.00  0.00           N  
ATOM    431  CA  THR A  28      11.178   3.315 -82.662  1.00  0.00           C  
ATOM    432  C   THR A  28      12.314   3.906 -83.521  1.00  0.00           C  
ATOM    433  O   THR A  28      12.028   4.708 -84.425  1.00  0.00           O  
ATOM    434  CB  THR A  28      10.926   4.243 -81.459  1.00  0.00           C  
ATOM    435  OG1 THR A  28      12.032   4.162 -80.550  1.00  0.00           O  
ATOM    436  CG2 THR A  28       9.649   3.845 -80.735  1.00  0.00           C  
ATOM    437  H   THR A  28      11.569   1.825 -81.203  1.00  0.00           H  
ATOM    438  HA  THR A  28      10.308   3.330 -83.319  1.00  0.00           H  
ATOM    439  HB  THR A  28      10.834   5.272 -81.806  1.00  0.00           H  
ATOM    440  HG1 THR A  28      11.969   3.349 -80.042  1.00  0.00           H  
ATOM    441 1HG2 THR A  28       9.488   4.512 -79.888  1.00  0.00           H  
ATOM    442 2HG2 THR A  28       8.805   3.917 -81.420  1.00  0.00           H  
ATOM    443 3HG2 THR A  28       9.739   2.820 -80.377  1.00  0.00           H  
ATOM    444  N   ALA A  29      13.535   3.261 -83.371  1.00  0.00           N  
ATOM    445  CA  ALA A  29      14.591   3.505 -84.310  1.00  0.00           C  
ATOM    446  C   ALA A  29      14.199   3.075 -85.739  1.00  0.00           C  
ATOM    447  O   ALA A  29      14.381   3.857 -86.679  1.00  0.00           O  
ATOM    448  CB  ALA A  29      15.881   2.855 -83.836  1.00  0.00           C  
ATOM    449  H   ALA A  29      13.693   2.619 -82.608  1.00  0.00           H  
ATOM    450  HA  ALA A  29      14.779   4.578 -84.337  1.00  0.00           H  
ATOM    451 1HB  ALA A  29      16.673   3.050 -84.560  1.00  0.00           H  
ATOM    452 2HB  ALA A  29      16.164   3.270 -82.869  1.00  0.00           H  
ATOM    453 3HB  ALA A  29      15.733   1.781 -83.741  1.00  0.00           H  
ATOM    454  N   ARG A  30      13.469   1.922 -85.818  1.00  0.00           N  
ATOM    455  CA  ARG A  30      12.923   1.444 -87.097  1.00  0.00           C  
ATOM    456  C   ARG A  30      11.916   2.324 -87.795  1.00  0.00           C  
ATOM    457  O   ARG A  30      12.019   2.642 -88.984  1.00  0.00           O  
ATOM    458  CB  ARG A  30      12.270   0.086 -86.887  1.00  0.00           C  
ATOM    459  CG  ARG A  30      13.230  -1.038 -86.533  1.00  0.00           C  
ATOM    460  CD  ARG A  30      12.532  -2.345 -86.427  1.00  0.00           C  
ATOM    461  NE  ARG A  30      13.436  -3.412 -86.030  1.00  0.00           N  
ATOM    462  CZ  ARG A  30      13.103  -4.717 -85.979  1.00  0.00           C  
ATOM    463  NH1 ARG A  30      11.888  -5.099 -86.303  1.00  0.00           N  
ATOM    464  NH2 ARG A  30      13.999  -5.613 -85.604  1.00  0.00           N  
ATOM    465  H   ARG A  30      13.300   1.385 -84.979  1.00  0.00           H  
ATOM    466  HA  ARG A  30      13.744   1.341 -87.807  1.00  0.00           H  
ATOM    467 1HB  ARG A  30      11.534   0.155 -86.087  1.00  0.00           H  
ATOM    468 2HB  ARG A  30      11.740  -0.207 -87.794  1.00  0.00           H  
ATOM    469 1HG  ARG A  30      13.996  -1.120 -87.305  1.00  0.00           H  
ATOM    470 2HG  ARG A  30      13.704  -0.824 -85.574  1.00  0.00           H  
ATOM    471 1HD  ARG A  30      11.739  -2.275 -85.683  1.00  0.00           H  
ATOM    472 2HD  ARG A  30      12.100  -2.606 -87.393  1.00  0.00           H  
ATOM    473  HE  ARG A  30      14.380  -3.158 -85.773  1.00  0.00           H  
ATOM    474 1HH1 ARG A  30      11.203  -4.414 -86.590  1.00  0.00           H  
ATOM    475 2HH1 ARG A  30      11.638  -6.077 -86.266  1.00  0.00           H  
ATOM    476 1HH2 ARG A  30      14.934  -5.320 -85.355  1.00  0.00           H  
ATOM    477 2HH2 ARG A  30      13.750  -6.591 -85.566  1.00  0.00           H  
ATOM    478  N   ALA A  31      11.069   2.919 -86.996  1.00  0.00           N  
ATOM    479  CA  ALA A  31      10.013   3.951 -87.418  1.00  0.00           C  
ATOM    480  C   ALA A  31      10.681   5.124 -88.217  1.00  0.00           C  
ATOM    481  O   ALA A  31      10.267   5.488 -89.319  1.00  0.00           O  
ATOM    482  CB  ALA A  31       9.196   4.327 -86.210  1.00  0.00           C  
ATOM    483  H   ALA A  31      11.140   2.658 -86.023  1.00  0.00           H  
ATOM    484  HA  ALA A  31       9.294   3.454 -88.069  1.00  0.00           H  
ATOM    485 1HB  ALA A  31       8.441   5.060 -86.496  1.00  0.00           H  
ATOM    486 2HB  ALA A  31       8.706   3.439 -85.811  1.00  0.00           H  
ATOM    487 3HB  ALA A  31       9.847   4.755 -85.449  1.00  0.00           H  
ATOM    488  N   GLN A  32      11.713   5.758 -87.583  1.00  0.00           N  
ATOM    489  CA  GLN A  32      12.500   6.860 -88.151  1.00  0.00           C  
ATOM    490  C   GLN A  32      13.331   6.464 -89.339  1.00  0.00           C  
ATOM    491  O   GLN A  32      13.251   7.057 -90.379  1.00  0.00           O  
ATOM    492  CB  GLN A  32      13.420   7.458 -87.083  1.00  0.00           C  
ATOM    493  CG  GLN A  32      12.688   8.187 -85.969  1.00  0.00           C  
ATOM    494  CD  GLN A  32      13.638   8.820 -84.970  1.00  0.00           C  
ATOM    495  OE1 GLN A  32      14.566   8.172 -84.478  1.00  0.00           O  
ATOM    496  NE2 GLN A  32      13.411  10.092 -84.663  1.00  0.00           N  
ATOM    497  H   GLN A  32      11.932   5.424 -86.655  1.00  0.00           H  
ATOM    498  HA  GLN A  32      11.813   7.633 -88.496  1.00  0.00           H  
ATOM    499 1HB  GLN A  32      14.017   6.666 -86.631  1.00  0.00           H  
ATOM    500 2HB  GLN A  32      14.109   8.162 -87.549  1.00  0.00           H  
ATOM    501 1HG  GLN A  32      12.075   8.976 -86.405  1.00  0.00           H  
ATOM    502 2HG  GLN A  32      12.057   7.475 -85.436  1.00  0.00           H  
ATOM    503 1HE2 GLN A  32      14.005  10.564 -84.010  1.00  0.00           H  
ATOM    504 2HE2 GLN A  32      12.647  10.580 -85.085  1.00  0.00           H  
ATOM    505  N   VAL A  33      13.898   5.225 -89.350  1.00  0.00           N  
ATOM    506  CA  VAL A  33      14.639   4.701 -90.550  1.00  0.00           C  
ATOM    507  C   VAL A  33      13.575   4.490 -91.729  1.00  0.00           C  
ATOM    508  O   VAL A  33      13.862   4.732 -92.879  1.00  0.00           O  
ATOM    509  CB  VAL A  33      15.351   3.376 -90.220  1.00  0.00           C  
ATOM    510  CG1 VAL A  33      15.907   2.741 -91.486  1.00  0.00           C  
ATOM    511  CG2 VAL A  33      16.459   3.622 -89.208  1.00  0.00           C  
ATOM    512  H   VAL A  33      13.818   4.643 -88.528  1.00  0.00           H  
ATOM    513  HA  VAL A  33      15.392   5.435 -90.839  1.00  0.00           H  
ATOM    514  HB  VAL A  33      14.625   2.678 -89.803  1.00  0.00           H  
ATOM    515 1HG1 VAL A  33      16.406   1.805 -91.234  1.00  0.00           H  
ATOM    516 2HG1 VAL A  33      15.092   2.541 -92.181  1.00  0.00           H  
ATOM    517 3HG1 VAL A  33      16.622   3.419 -91.950  1.00  0.00           H  
ATOM    518 1HG2 VAL A  33      16.958   2.680 -88.979  1.00  0.00           H  
ATOM    519 2HG2 VAL A  33      17.182   4.324 -89.624  1.00  0.00           H  
ATOM    520 3HG2 VAL A  33      16.033   4.038 -88.295  1.00  0.00           H  
ATOM    521  N   SER A  34      12.388   3.881 -91.435  1.00  0.00           N  
ATOM    522  CA  SER A  34      11.422   3.630 -92.499  1.00  0.00           C  
ATOM    523  C   SER A  34      10.838   4.892 -93.230  1.00  0.00           C  
ATOM    524  O   SER A  34      10.693   4.921 -94.498  1.00  0.00           O  
ATOM    525  CB  SER A  34      10.282   2.821 -91.911  1.00  0.00           C  
ATOM    526  OG  SER A  34       9.523   3.595 -91.023  1.00  0.00           O  
ATOM    527  H   SER A  34      12.165   3.599 -90.491  1.00  0.00           H  
ATOM    528  HA  SER A  34      11.915   3.058 -93.287  1.00  0.00           H  
ATOM    529 1HB  SER A  34       9.644   2.453 -92.714  1.00  0.00           H  
ATOM    530 2HB  SER A  34      10.684   1.953 -91.389  1.00  0.00           H  
ATOM    531  HG  SER A  34      10.144   4.183 -90.587  1.00  0.00           H  
ATOM    532  N   GLU A  35      10.743   5.927 -92.381  1.00  0.00           N  
ATOM    533  CA  GLU A  35      10.282   7.320 -92.829  1.00  0.00           C  
ATOM    534  C   GLU A  35      11.369   7.886 -93.702  1.00  0.00           C  
ATOM    535  O   GLU A  35      11.124   8.371 -94.827  1.00  0.00           O  
ATOM    536  CB  GLU A  35      10.024   8.266 -91.653  1.00  0.00           C  
ATOM    537  CG  GLU A  35       8.758   7.959 -90.866  1.00  0.00           C  
ATOM    538  CD  GLU A  35       8.622   8.799 -89.627  1.00  0.00           C  
ATOM    539  OE1 GLU A  35       9.460   8.691 -88.764  1.00  0.00           O  
ATOM    540  OE2 GLU A  35       7.678   9.549 -89.542  1.00  0.00           O  
ATOM    541  H   GLU A  35      10.986   5.777 -91.412  1.00  0.00           H  
ATOM    542  HA  GLU A  35       9.345   7.215 -93.377  1.00  0.00           H  
ATOM    543 1HB  GLU A  35      10.866   8.225 -90.962  1.00  0.00           H  
ATOM    544 2HB  GLU A  35       9.950   9.290 -92.020  1.00  0.00           H  
ATOM    545 1HG  GLU A  35       7.893   8.134 -91.506  1.00  0.00           H  
ATOM    546 2HG  GLU A  35       8.762   6.906 -90.587  1.00  0.00           H  
ATOM    547  N   ALA A  36      12.613   7.751 -93.350  1.00  0.00           N  
ATOM    548  CA  ALA A  36      13.798   8.158 -94.072  1.00  0.00           C  
ATOM    549  C   ALA A  36      13.932   7.440 -95.433  1.00  0.00           C  
ATOM    550  O   ALA A  36      14.144   8.108 -96.466  1.00  0.00           O  
ATOM    551  CB  ALA A  36      15.001   7.865 -93.196  1.00  0.00           C  
ATOM    552  H   ALA A  36      12.716   7.299 -92.452  1.00  0.00           H  
ATOM    553  HA  ALA A  36      13.715   9.224 -94.284  1.00  0.00           H  
ATOM    554 1HB  ALA A  36      15.911   8.163 -93.717  1.00  0.00           H  
ATOM    555 2HB  ALA A  36      14.916   8.424 -92.264  1.00  0.00           H  
ATOM    556 3HB  ALA A  36      15.040   6.800 -92.978  1.00  0.00           H  
ATOM    557  N   ILE A  37      13.643   6.094 -95.492  1.00  0.00           N  
ATOM    558  CA  ILE A  37      13.655   5.300 -96.653  1.00  0.00           C  
ATOM    559  C   ILE A  37      12.584   5.774 -97.652  1.00  0.00           C  
ATOM    560  O   ILE A  37      13.064   5.953 -98.750  1.00  0.00           O  
ATOM    561  CB  ILE A  37      13.432   3.822 -96.282  1.00  0.00           C  
ATOM    562  CG1 ILE A  37      14.650   3.270 -95.535  1.00  0.00           C  
ATOM    563  CG2 ILE A  37      13.149   2.998 -97.528  1.00  0.00           C  
ATOM    564  CD1 ILE A  37      14.410   1.926 -94.887  1.00  0.00           C  
ATOM    565  H   ILE A  37      13.406   5.669 -94.607  1.00  0.00           H  
ATOM    566  HA  ILE A  37      14.628   5.401 -97.131  1.00  0.00           H  
ATOM    567  HB  ILE A  37      12.584   3.741 -95.604  1.00  0.00           H  
ATOM    568 1HG1 ILE A  37      15.486   3.172 -96.227  1.00  0.00           H  
ATOM    569 2HG1 ILE A  37      14.950   3.974 -94.759  1.00  0.00           H  
ATOM    570 1HG2 ILE A  37      12.995   1.956 -97.248  1.00  0.00           H  
ATOM    571 2HG2 ILE A  37      12.254   3.377 -98.020  1.00  0.00           H  
ATOM    572 3HG2 ILE A  37      13.996   3.068 -98.211  1.00  0.00           H  
ATOM    573 1HD1 ILE A  37      15.318   1.601 -94.377  1.00  0.00           H  
ATOM    574 2HD1 ILE A  37      13.598   2.010 -94.163  1.00  0.00           H  
ATOM    575 3HD1 ILE A  37      14.143   1.197 -95.650  1.00  0.00           H  
ATOM    576  N   LEU A  38      11.373   6.038 -97.179  1.00  0.00           N  
ATOM    577  CA  LEU A  38      10.281   6.455 -98.041  1.00  0.00           C  
ATOM    578  C   LEU A  38      10.714   7.772 -98.730  1.00  0.00           C  
ATOM    579  O   LEU A  38      10.493   8.002 -99.964  1.00  0.00           O  
ATOM    580  CB  LEU A  38       8.992   6.654 -97.234  1.00  0.00           C  
ATOM    581  CG  LEU A  38       8.328   5.372 -96.714  1.00  0.00           C  
ATOM    582  CD1 LEU A  38       7.184   5.735 -95.778  1.00  0.00           C  
ATOM    583  CD2 LEU A  38       7.831   4.545 -97.890  1.00  0.00           C  
ATOM    584  H   LEU A  38      11.208   5.944 -96.187  1.00  0.00           H  
ATOM    585  HA  LEU A  38      10.107   5.675 -98.781  1.00  0.00           H  
ATOM    586 1HB  LEU A  38       9.214   7.283 -96.374  1.00  0.00           H  
ATOM    587 2HB  LEU A  38       8.266   7.172 -97.860  1.00  0.00           H  
ATOM    588  HG  LEU A  38       9.054   4.792 -96.144  1.00  0.00           H  
ATOM    589 1HD1 LEU A  38       6.712   4.825 -95.408  1.00  0.00           H  
ATOM    590 2HD1 LEU A  38       7.571   6.310 -94.936  1.00  0.00           H  
ATOM    591 3HD1 LEU A  38       6.448   6.331 -96.317  1.00  0.00           H  
ATOM    592 1HD2 LEU A  38       7.360   3.633 -97.521  1.00  0.00           H  
ATOM    593 2HD2 LEU A  38       7.104   5.123 -98.460  1.00  0.00           H  
ATOM    594 3HD2 LEU A  38       8.672   4.284 -98.533  1.00  0.00           H  
ATOM    595  N   LEU A  39      11.324   8.643 -97.956  1.00  0.00           N  
ATOM    596  CA  LEU A  39      11.786   9.970 -98.437  1.00  0.00           C  
ATOM    597  C   LEU A  39      12.900   9.836 -99.444  1.00  0.00           C  
ATOM    598  O   LEU A  39      12.900  10.401-100.494  1.00  0.00           O  
ATOM    599  CB  LEU A  39      12.273  10.833 -97.265  1.00  0.00           C  
ATOM    600  CG  LEU A  39      11.185  11.312 -96.295  1.00  0.00           C  
ATOM    601  CD1 LEU A  39      11.837  11.953 -95.077  1.00  0.00           C  
ATOM    602  CD2 LEU A  39      10.269  12.297 -97.006  1.00  0.00           C  
ATOM    603  H   LEU A  39      11.480   8.387 -96.992  1.00  0.00           H  
ATOM    604  HA  LEU A  39      10.948  10.476 -98.914  1.00  0.00           H  
ATOM    605 1HB  LEU A  39      13.000  10.261 -96.691  1.00  0.00           H  
ATOM    606 2HB  LEU A  39      12.771  11.715 -97.667  1.00  0.00           H  
ATOM    607  HG  LEU A  39      10.602  10.458 -95.951  1.00  0.00           H  
ATOM    608 1HD1 LEU A  39      11.065  12.293 -94.388  1.00  0.00           H  
ATOM    609 2HD1 LEU A  39      12.472  11.221 -94.577  1.00  0.00           H  
ATOM    610 3HD1 LEU A  39      12.442  12.802 -95.393  1.00  0.00           H  
ATOM    611 1HD2 LEU A  39       9.495  12.637 -96.316  1.00  0.00           H  
ATOM    612 2HD2 LEU A  39      10.850  13.153 -97.349  1.00  0.00           H  
ATOM    613 3HD2 LEU A  39       9.803  11.808 -97.861  1.00  0.00           H  
ATOM    614  N   ALA A  40      13.840   8.876 -99.210  1.00  0.00           N  
ATOM    615  CA  ALA A  40      14.961   8.615-100.102  1.00  0.00           C  
ATOM    616  C   ALA A  40      14.686   7.670-101.336  1.00  0.00           C  
ATOM    617  O   ALA A  40      15.241   7.783-102.390  1.00  0.00           O  
ATOM    618  CB  ALA A  40      16.057   7.947 -99.239  1.00  0.00           C  
ATOM    619  H   ALA A  40      13.742   8.325 -98.370  1.00  0.00           H  
ATOM    620  HA  ALA A  40      15.261   9.560-100.555  1.00  0.00           H  
ATOM    621 1HB  ALA A  40      16.926   7.728 -99.860  1.00  0.00           H  
ATOM    622 2HB  ALA A  40      16.348   8.622 -98.434  1.00  0.00           H  
ATOM    623 3HB  ALA A  40      15.672   7.022 -98.815  1.00  0.00           H  
ATOM    624  N   GLU A  41      13.611   6.905-101.205  1.00  0.00           N  
ATOM    625  CA  GLU A  41      13.132   5.917-102.115  1.00  0.00           C  
ATOM    626  C   GLU A  41      13.010   6.419-103.575  1.00  0.00           C  
ATOM    627  O   GLU A  41      13.092   5.620-104.501  1.00  0.00           O  
ATOM    628  CB  GLU A  41      11.776   5.407-101.619  1.00  0.00           C  
ATOM    629  CG  GLU A  41      11.226   4.223-102.400  1.00  0.00           C  
ATOM    630  CD  GLU A  41       9.920   3.717-101.853  1.00  0.00           C  
ATOM    631  OE1 GLU A  41       9.406   4.321-100.943  1.00  0.00           O  
ATOM    632  OE2 GLU A  41       9.437   2.725-102.346  1.00  0.00           O  
ATOM    633  H   GLU A  41      13.102   7.074-100.349  1.00  0.00           H  
ATOM    634  HA  GLU A  41      13.844   5.092-102.136  1.00  0.00           H  
ATOM    635 1HB  GLU A  41      11.860   5.109-100.574  1.00  0.00           H  
ATOM    636 2HB  GLU A  41      11.044   6.212-101.672  1.00  0.00           H  
ATOM    637 1HG  GLU A  41      11.080   4.521-103.438  1.00  0.00           H  
ATOM    638 2HG  GLU A  41      11.958   3.417-102.382  1.00  0.00           H  
ATOM    639  N   GLY A  42      12.636   7.691-103.923  1.00  0.00           N  
ATOM    640  CA  GLY A  42      12.509   8.112-105.366  1.00  0.00           C  
ATOM    641  C   GLY A  42      13.698   7.834-106.217  1.00  0.00           C  
ATOM    642  O   GLY A  42      13.441   7.641-107.396  1.00  0.00           O  
ATOM    643  H   GLY A  42      12.441   8.363-103.195  1.00  0.00           H  
ATOM    644 1HA  GLY A  42      11.655   7.607-105.818  1.00  0.00           H  
ATOM    645 2HA  GLY A  42      12.312   9.183-105.416  1.00  0.00           H  
ATOM    646  N   GLN A  43      14.907   7.593-105.625  1.00  0.00           N  
ATOM    647  CA  GLN A  43      16.118   7.318-106.423  1.00  0.00           C  
ATOM    648  C   GLN A  43      16.012   5.957-107.194  1.00  0.00           C  
ATOM    649  O   GLN A  43      16.897   5.672-107.973  1.00  0.00           O  
ATOM    650  CB  GLN A  43      17.352   7.316-105.516  1.00  0.00           C  
ATOM    651  CG  GLN A  43      17.660   8.662-104.882  1.00  0.00           C  
ATOM    652  CD  GLN A  43      17.850   9.758-105.913  1.00  0.00           C  
ATOM    653  OE1 GLN A  43      17.073   9.876-106.864  1.00  0.00           O  
ATOM    654  NE2 GLN A  43      18.888  10.566-105.731  1.00  0.00           N  
ATOM    655  H   GLN A  43      14.973   7.602-104.617  1.00  0.00           H  
ATOM    656  HA  GLN A  43      16.228   8.106-107.167  1.00  0.00           H  
ATOM    657 1HB  GLN A  43      17.214   6.590-104.715  1.00  0.00           H  
ATOM    658 2HB  GLN A  43      18.225   7.007-106.090  1.00  0.00           H  
ATOM    659 1HG  GLN A  43      16.831   8.944-104.232  1.00  0.00           H  
ATOM    660 2HG  GLN A  43      18.578   8.576-104.300  1.00  0.00           H  
ATOM    661 1HE2 GLN A  43      19.065  11.308-106.379  1.00  0.00           H  
ATOM    662 2HE2 GLN A  43      19.494  10.434-104.946  1.00  0.00           H  
ATOM    663  N   LYS A  44      15.110   5.107-106.822  1.00  0.00           N  
ATOM    664  CA  LYS A  44      14.750   3.826-107.498  1.00  0.00           C  
ATOM    665  C   LYS A  44      14.277   4.085-108.934  1.00  0.00           C  
ATOM    666  O   LYS A  44      14.255   3.097-109.758  1.00  0.00           O  
ATOM    667  CB  LYS A  44      13.664   3.081-106.720  1.00  0.00           C  
ATOM    668  CG  LYS A  44      14.164   2.365-105.472  1.00  0.00           C  
ATOM    669  CD  LYS A  44      13.034   2.121-104.484  1.00  0.00           C  
ATOM    670  CE  LYS A  44      12.009   1.146-105.045  1.00  0.00           C  
ATOM    671  NZ  LYS A  44      10.994   0.759-104.027  1.00  0.00           N  
ATOM    672  H   LYS A  44      14.619   5.374-105.981  1.00  0.00           H  
ATOM    673  HA  LYS A  44      15.638   3.195-107.539  1.00  0.00           H  
ATOM    674 1HB  LYS A  44      12.889   3.784-106.413  1.00  0.00           H  
ATOM    675 2HB  LYS A  44      13.196   2.340-107.367  1.00  0.00           H  
ATOM    676 1HG  LYS A  44      14.602   1.406-105.754  1.00  0.00           H  
ATOM    677 2HG  LYS A  44      14.933   2.967-104.990  1.00  0.00           H  
ATOM    678 1HD  LYS A  44      13.441   1.714-103.558  1.00  0.00           H  
ATOM    679 2HD  LYS A  44      12.537   3.064-104.259  1.00  0.00           H  
ATOM    680 1HE  LYS A  44      11.499   1.601-105.893  1.00  0.00           H  
ATOM    681 2HE  LYS A  44      12.515   0.246-105.394  1.00  0.00           H  
ATOM    682 1HZ  LYS A  44      10.335   0.112-104.437  1.00  0.00           H  
ATOM    683 2HZ  LYS A  44      11.454   0.317-103.243  1.00  0.00           H  
ATOM    684 3HZ  LYS A  44      10.504   1.582-103.709  1.00  0.00           H  
ATOM    685  N   SER A  45      13.812   5.297-109.251  1.00  0.00           N  
ATOM    686  CA  SER A  45      13.533   5.681-110.624  1.00  0.00           C  
ATOM    687  C   SER A  45      14.785   5.384-111.420  1.00  0.00           C  
ATOM    688  O   SER A  45      14.706   4.584-112.382  1.00  0.00           O  
ATOM    689  CB  SER A  45      13.163   7.148-110.726  1.00  0.00           C  
ATOM    690  OG  SER A  45      13.006   7.535-112.063  1.00  0.00           O  
ATOM    691  H   SER A  45      13.651   5.965-108.510  1.00  0.00           H  
ATOM    692  HA  SER A  45      12.689   5.091-110.984  1.00  0.00           H  
ATOM    693 1HB  SER A  45      12.237   7.328-110.181  1.00  0.00           H  
ATOM    694 2HB  SER A  45      13.940   7.752-110.258  1.00  0.00           H  
ATOM    695  HG  SER A  45      12.467   6.854-112.474  1.00  0.00           H  
ATOM    696  N   ALA A  46      15.973   5.872-110.999  1.00  0.00           N  
ATOM    697  CA  ALA A  46      17.214   5.521-111.710  1.00  0.00           C  
ATOM    698  C   ALA A  46      17.614   4.082-111.828  1.00  0.00           C  
ATOM    699  O   ALA A  46      17.836   3.670-112.928  1.00  0.00           O  
ATOM    700  CB  ALA A  46      18.304   6.290-110.966  1.00  0.00           C  
ATOM    701  H   ALA A  46      16.022   6.480-110.194  1.00  0.00           H  
ATOM    702  HA  ALA A  46      17.110   5.834-112.749  1.00  0.00           H  
ATOM    703 1HB  ALA A  46      19.271   6.089-111.428  1.00  0.00           H  
ATOM    704 2HB  ALA A  46      18.094   7.358-111.015  1.00  0.00           H  
ATOM    705 3HB  ALA A  46      18.327   5.972-109.925  1.00  0.00           H  
ATOM    706  N   VAL A  47      17.461   3.310-110.712  1.00  0.00           N  
ATOM    707  CA  VAL A  47      17.791   1.851-110.600  1.00  0.00           C  
ATOM    708  C   VAL A  47      16.998   1.099-111.671  1.00  0.00           C  
ATOM    709  O   VAL A  47      17.537   0.172-112.204  1.00  0.00           O  
ATOM    710  CB  VAL A  47      17.438   1.295-109.208  1.00  0.00           C  
ATOM    711  CG1 VAL A  47      17.547  -0.222-109.197  1.00  0.00           C  
ATOM    712  CG2 VAL A  47      18.351   1.909-108.158  1.00  0.00           C  
ATOM    713  H   VAL A  47      17.091   3.793-109.906  1.00  0.00           H  
ATOM    714  HA  VAL A  47      18.864   1.727-110.752  1.00  0.00           H  
ATOM    715  HB  VAL A  47      16.402   1.544-108.979  1.00  0.00           H  
ATOM    716 1HG1 VAL A  47      17.294  -0.599-108.206  1.00  0.00           H  
ATOM    717 2HG1 VAL A  47      16.859  -0.642-109.931  1.00  0.00           H  
ATOM    718 3HG1 VAL A  47      18.567  -0.516-109.446  1.00  0.00           H  
ATOM    719 1HG2 VAL A  47      18.095   1.512-107.176  1.00  0.00           H  
ATOM    720 2HG2 VAL A  47      19.388   1.664-108.390  1.00  0.00           H  
ATOM    721 3HG2 VAL A  47      18.226   2.992-108.155  1.00  0.00           H  
ATOM    722  N   THR A  48      15.683   1.347-111.829  1.00  0.00           N  
ATOM    723  CA  THR A  48      14.889   0.690-112.832  1.00  0.00           C  
ATOM    724  C   THR A  48      14.914   1.326-114.259  1.00  0.00           C  
ATOM    725  O   THR A  48      15.059   0.620-115.269  1.00  0.00           O  
ATOM    726  CB  THR A  48      13.434   0.611-112.334  1.00  0.00           C  
ATOM    727  OG1 THR A  48      13.392  -0.079-111.078  1.00  0.00           O  
ATOM    728  CG2 THR A  48      12.565  -0.126-113.342  1.00  0.00           C  
ATOM    729  H   THR A  48      15.244   2.021-111.218  1.00  0.00           H  
ATOM    730  HA  THR A  48      15.280  -0.318-112.977  1.00  0.00           H  
ATOM    731  HB  THR A  48      13.042   1.618-112.193  1.00  0.00           H  
ATOM    732  HG1 THR A  48      13.328   0.560-110.364  1.00  0.00           H  
ATOM    733 1HG2 THR A  48      11.540  -0.172-112.974  1.00  0.00           H  
ATOM    734 2HG2 THR A  48      12.585   0.403-114.295  1.00  0.00           H  
ATOM    735 3HG2 THR A  48      12.945  -1.137-113.480  1.00  0.00           H  
ATOM    736  N   GLU A  49      14.775   2.627-114.312  1.00  0.00           N  
ATOM    737  CA  GLU A  49      14.782   3.358-115.585  1.00  0.00           C  
ATOM    738  C   GLU A  49      15.976   3.238-116.501  1.00  0.00           C  
ATOM    739  O   GLU A  49      15.955   2.796-117.628  1.00  0.00           O  
ATOM    740  CB  GLU A  49      14.581   4.846-115.290  1.00  0.00           C  
ATOM    741  CG  GLU A  49      14.650   5.745-116.517  1.00  0.00           C  
ATOM    742  CD  GLU A  49      13.378   5.741-117.318  1.00  0.00           C  
ATOM    743  OE1 GLU A  49      12.327   5.822-116.730  1.00  0.00           O  
ATOM    744  OE2 GLU A  49      13.458   5.656-118.521  1.00  0.00           O  
ATOM    745  H   GLU A  49      14.660   3.141-113.451  1.00  0.00           H  
ATOM    746  HA  GLU A  49      13.959   2.991-116.199  1.00  0.00           H  
ATOM    747 1HB  GLU A  49      13.608   4.995-114.821  1.00  0.00           H  
ATOM    748 2HB  GLU A  49      15.340   5.183-114.585  1.00  0.00           H  
ATOM    749 1HG  GLU A  49      14.860   6.765-116.195  1.00  0.00           H  
ATOM    750 2HG  GLU A  49      15.474   5.416-117.149  1.00  0.00           H  
ATOM    751  N   TYR A  50      17.098   3.594-115.841  1.00  0.00           N  
ATOM    752  CA  TYR A  50      18.371   3.606-116.531  1.00  0.00           C  
ATOM    753  C   TYR A  50      18.697   2.140-116.782  1.00  0.00           C  
ATOM    754  O   TYR A  50      18.940   1.879-117.904  1.00  0.00           O  
ATOM    755  CB  TYR A  50      19.461   4.303-115.715  1.00  0.00           C  
ATOM    756  CG  TYR A  50      20.779   4.438-116.446  1.00  0.00           C  
ATOM    757  CD1 TYR A  50      20.963   5.464-117.360  1.00  0.00           C  
ATOM    758  CD2 TYR A  50      21.803   3.534-116.202  1.00  0.00           C  
ATOM    759  CE1 TYR A  50      22.167   5.587-118.028  1.00  0.00           C  
ATOM    760  CE2 TYR A  50      23.006   3.657-116.869  1.00  0.00           C  
ATOM    761  CZ  TYR A  50      23.189   4.678-117.779  1.00  0.00           C  
ATOM    762  OH  TYR A  50      24.388   4.801-118.444  1.00  0.00           O  
ATOM    763  H   TYR A  50      17.065   3.855-114.866  1.00  0.00           H  
ATOM    764  HA  TYR A  50      18.252   4.153-117.467  1.00  0.00           H  
ATOM    765 1HB  TYR A  50      19.124   5.302-115.435  1.00  0.00           H  
ATOM    766 2HB  TYR A  50      19.638   3.747-114.794  1.00  0.00           H  
ATOM    767  HD1 TYR A  50      20.158   6.174-117.552  1.00  0.00           H  
ATOM    768  HD2 TYR A  50      21.658   2.727-115.484  1.00  0.00           H  
ATOM    769  HE1 TYR A  50      22.311   6.393-118.746  1.00  0.00           H  
ATOM    770  HE2 TYR A  50      23.810   2.946-116.678  1.00  0.00           H  
ATOM    771  HH  TYR A  50      24.783   3.932-118.551  1.00  0.00           H  
ATOM    772  N   TYR A  51      18.554   1.227-115.842  1.00  0.00           N  
ATOM    773  CA  TYR A  51      18.950  -0.143-116.053  1.00  0.00           C  
ATOM    774  C   TYR A  51      18.271  -0.820-117.190  1.00  0.00           C  
ATOM    775  O   TYR A  51      18.936  -1.188-118.188  1.00  0.00           O  
ATOM    776  CB  TYR A  51      18.711  -0.952-114.776  1.00  0.00           C  
ATOM    777  CG  TYR A  51      19.036  -2.423-114.915  1.00  0.00           C  
ATOM    778  CD1 TYR A  51      20.357  -2.834-115.015  1.00  0.00           C  
ATOM    779  CD2 TYR A  51      18.014  -3.360-114.942  1.00  0.00           C  
ATOM    780  CE1 TYR A  51      20.655  -4.177-115.143  1.00  0.00           C  
ATOM    781  CE2 TYR A  51      18.312  -4.703-115.070  1.00  0.00           C  
ATOM    782  CZ  TYR A  51      19.626  -5.112-115.169  1.00  0.00           C  
ATOM    783  OH  TYR A  51      19.922  -6.450-115.296  1.00  0.00           O  
ATOM    784  H   TYR A  51      18.157   1.493-114.952  1.00  0.00           H  
ATOM    785  HA  TYR A  51      20.013  -0.163-116.292  1.00  0.00           H  
ATOM    786 1HB  TYR A  51      19.318  -0.544-113.967  1.00  0.00           H  
ATOM    787 2HB  TYR A  51      17.666  -0.862-114.478  1.00  0.00           H  
ATOM    788  HD1 TYR A  51      21.161  -2.098-114.994  1.00  0.00           H  
ATOM    789  HD2 TYR A  51      16.976  -3.037-114.865  1.00  0.00           H  
ATOM    790  HE1 TYR A  51      21.693  -4.501-115.221  1.00  0.00           H  
ATOM    791  HE2 TYR A  51      17.508  -5.440-115.092  1.00  0.00           H  
ATOM    792  HH  TYR A  51      19.107  -6.957-115.316  1.00  0.00           H  
ATOM    793  N   LEU A  52      16.895  -0.766-117.214  1.00  0.00           N  
ATOM    794  CA  LEU A  52      16.124  -1.502-118.204  1.00  0.00           C  
ATOM    795  C   LEU A  52      16.146  -0.854-119.582  1.00  0.00           C  
ATOM    796  O   LEU A  52      16.073  -1.664-120.496  1.00  0.00           O  
ATOM    797  CB  LEU A  52      14.671  -1.636-117.730  1.00  0.00           C  
ATOM    798  CG  LEU A  52      14.452  -2.525-116.500  1.00  0.00           C  
ATOM    799  CD1 LEU A  52      12.991  -2.453-116.074  1.00  0.00           C  
ATOM    800  CD2 LEU A  52      14.856  -3.955-116.828  1.00  0.00           C  
ATOM    801  H   LEU A  52      16.409  -0.203-116.531  1.00  0.00           H  
ATOM    802  HA  LEU A  52      16.556  -2.497-118.309  1.00  0.00           H  
ATOM    803 1HB  LEU A  52      14.291  -0.643-117.493  1.00  0.00           H  
ATOM    804 2HB  LEU A  52      14.075  -2.045-118.545  1.00  0.00           H  
ATOM    805  HG  LEU A  52      15.058  -2.158-115.672  1.00  0.00           H  
ATOM    806 1HD1 LEU A  52      12.835  -3.086-115.200  1.00  0.00           H  
ATOM    807 2HD1 LEU A  52      12.735  -1.423-115.827  1.00  0.00           H  
ATOM    808 3HD1 LEU A  52      12.358  -2.800-116.890  1.00  0.00           H  
ATOM    809 1HD2 LEU A  52      14.701  -4.587-115.953  1.00  0.00           H  
ATOM    810 2HD2 LEU A  52      14.249  -4.324-117.655  1.00  0.00           H  
ATOM    811 3HD2 LEU A  52      15.908  -3.979-117.112  1.00  0.00           H  
ATOM    812  N   ASN A  53      16.316   0.443-119.677  1.00  0.00           N  
ATOM    813  CA  ASN A  53      16.223   1.154-120.991  1.00  0.00           C  
ATOM    814  C   ASN A  53      17.611   1.354-121.637  1.00  0.00           C  
ATOM    815  O   ASN A  53      17.797   1.409-122.861  1.00  0.00           O  
ATOM    816  CB  ASN A  53      15.525   2.492-120.829  1.00  0.00           C  
ATOM    817  CG  ASN A  53      14.060   2.346-120.522  1.00  0.00           C  
ATOM    818  OD1 ASN A  53      13.414   1.387-120.959  1.00  0.00           O  
ATOM    819  ND2 ASN A  53      13.524   3.280-119.778  1.00  0.00           N  
ATOM    820  H   ASN A  53      16.515   0.976-118.842  1.00  0.00           H  
ATOM    821  HA  ASN A  53      15.638   0.539-121.677  1.00  0.00           H  
ATOM    822 1HB  ASN A  53      15.999   3.055-120.023  1.00  0.00           H  
ATOM    823 2HB  ASN A  53      15.636   3.074-121.744  1.00  0.00           H  
ATOM    824 1HD2 ASN A  53      12.552   3.235-119.542  1.00  0.00           H  
ATOM    825 2HD2 ASN A  53      14.084   4.038-119.446  1.00  0.00           H  
ATOM    826  N   HIS A  54      18.688   1.239-120.786  1.00  0.00           N  
ATOM    827  CA  HIS A  54      20.059   1.441-121.248  1.00  0.00           C  
ATOM    828  C   HIS A  54      20.855   0.161-121.157  1.00  0.00           C  
ATOM    829  O   HIS A  54      22.065   0.079-121.509  1.00  0.00           O  
ATOM    830  CB  HIS A  54      20.756   2.536-120.434  1.00  0.00           C  
ATOM    831  CG  HIS A  54      20.147   3.893-120.605  1.00  0.00           C  
ATOM    832  ND1 HIS A  54      19.005   4.285-119.939  1.00  0.00           N  
ATOM    833  CD2 HIS A  54      20.519   4.948-121.367  1.00  0.00           C  
ATOM    834  CE1 HIS A  54      18.702   5.525-120.283  1.00  0.00           C  
ATOM    835  NE2 HIS A  54      19.605   5.949-121.148  1.00  0.00           N  
ATOM    836  H   HIS A  54      18.524   1.009-119.817  1.00  0.00           H  
ATOM    837  HA  HIS A  54      20.049   1.755-122.291  1.00  0.00           H  
ATOM    838 1HB  HIS A  54      20.724   2.279-119.375  1.00  0.00           H  
ATOM    839 2HB  HIS A  54      21.805   2.594-120.725  1.00  0.00           H  
ATOM    840  HD2 HIS A  54      21.383   4.995-122.030  1.00  0.00           H  
ATOM    841  HE1 HIS A  54      17.852   6.099-119.915  1.00  0.00           H  
ATOM    842  HE2 HIS A  54      19.625   6.861-121.582  1.00  0.00           H  
ATOM    843  N   GLY A  55      20.379  -0.936-120.477  1.00  0.00           N  
ATOM    844  CA  GLY A  55      21.083  -2.188-120.342  1.00  0.00           C  
ATOM    845  C   GLY A  55      22.233  -2.247-119.374  1.00  0.00           C  
ATOM    846  O   GLY A  55      23.084  -3.169-119.513  1.00  0.00           O  
ATOM    847  H   GLY A  55      19.469  -0.835-120.050  1.00  0.00           H  
ATOM    848 1HA  GLY A  55      20.386  -2.966-120.032  1.00  0.00           H  
ATOM    849 2HA  GLY A  55      21.486  -2.484-121.309  1.00  0.00           H  
ATOM    850  N   GLU A  56      22.231  -1.440-118.340  1.00  0.00           N  
ATOM    851  CA  GLU A  56      23.345  -1.310-117.300  1.00  0.00           C  
ATOM    852  C   GLU A  56      22.954  -0.396-116.058  1.00  0.00           C  
ATOM    853  O   GLU A  56      22.045   0.446-116.175  1.00  0.00           O  
ATOM    854  CB  GLU A  56      24.607  -0.748-117.958  1.00  0.00           C  
ATOM    855  CG  GLU A  56      24.462   0.674-118.482  1.00  0.00           C  
ATOM    856  CD  GLU A  56      25.750   1.232-119.021  1.00  0.00           C  
ATOM    857  OE1 GLU A  56      26.614   0.460-119.361  1.00  0.00           O  
ATOM    858  OE2 GLU A  56      25.870   2.432-119.092  1.00  0.00           O  
ATOM    859  H   GLU A  56      21.404  -0.866-118.251  1.00  0.00           H  
ATOM    860  HA  GLU A  56      23.564  -2.301-116.902  1.00  0.00           H  
ATOM    861 1HB  GLU A  56      25.427  -0.758-117.240  1.00  0.00           H  
ATOM    862 2HB  GLU A  56      24.895  -1.385-118.794  1.00  0.00           H  
ATOM    863 1HG  GLU A  56      23.716   0.683-119.276  1.00  0.00           H  
ATOM    864 2HG  GLU A  56      24.104   1.312-117.676  1.00  0.00           H  
ATOM    865  N   TRP A  57      23.548  -0.761-114.926  1.00  0.00           N  
ATOM    866  CA  TRP A  57      23.210  -0.090-113.716  1.00  0.00           C  
ATOM    867  C   TRP A  57      23.612   1.438-113.702  1.00  0.00           C  
ATOM    868  O   TRP A  57      24.619   1.786-114.270  1.00  0.00           O  
ATOM    869  CB  TRP A  57      23.881  -0.828-112.556  1.00  0.00           C  
ATOM    870  CG  TRP A  57      23.357  -2.217-112.347  1.00  0.00           C  
ATOM    871  CD1 TRP A  57      24.041  -3.382-112.530  1.00  0.00           C  
ATOM    872  CD2 TRP A  57      22.029  -2.596-111.912  1.00  0.00           C  
ATOM    873  NE1 TRP A  57      23.234  -4.454-112.241  1.00  0.00           N  
ATOM    874  CE2 TRP A  57      21.999  -3.992-111.860  1.00  0.00           C  
ATOM    875  CE3 TRP A  57      20.880  -1.872-111.567  1.00  0.00           C  
ATOM    876  CZ2 TRP A  57      20.863  -4.688-111.478  1.00  0.00           C  
ATOM    877  CZ3 TRP A  57      19.742  -2.570-111.183  1.00  0.00           C  
ATOM    878  CH2 TRP A  57      19.734  -3.942-111.139  1.00  0.00           C  
ATOM    879  H   TRP A  57      24.233  -1.503-114.902  1.00  0.00           H  
ATOM    880  HA  TRP A  57      22.128  -0.121-113.594  1.00  0.00           H  
ATOM    881 1HB  TRP A  57      24.954  -0.890-112.735  1.00  0.00           H  
ATOM    882 2HB  TRP A  57      23.735  -0.265-111.634  1.00  0.00           H  
ATOM    883  HD1 TRP A  57      25.077  -3.451-112.857  1.00  0.00           H  
ATOM    884  HE1 TRP A  57      23.503  -5.426-112.300  1.00  0.00           H  
ATOM    885  HE3 TRP A  57      20.882  -0.783-111.598  1.00  0.00           H  
ATOM    886  HZ2 TRP A  57      20.838  -5.777-111.438  1.00  0.00           H  
ATOM    887  HZ3 TRP A  57      18.851  -2.000-110.917  1.00  0.00           H  
ATOM    888  HH2 TRP A  57      18.824  -4.458-110.833  1.00  0.00           H  
ATOM    889  N   PRO A  58      22.868   2.364-113.119  1.00  0.00           N  
ATOM    890  CA  PRO A  58      23.157   3.761-113.072  1.00  0.00           C  
ATOM    891  C   PRO A  58      24.351   4.111-112.256  1.00  0.00           C  
ATOM    892  O   PRO A  58      24.328   3.903-111.039  1.00  0.00           O  
ATOM    893  CB  PRO A  58      21.879   4.335-112.451  1.00  0.00           C  
ATOM    894  CG  PRO A  58      21.313   3.202-111.665  1.00  0.00           C  
ATOM    895  CD  PRO A  58      21.626   1.981-112.490  1.00  0.00           C  
ATOM    896  HA  PRO A  58      23.306   4.134-114.096  1.00  0.00           H  
ATOM    897 1HB  PRO A  58      22.124   5.207-111.826  1.00  0.00           H  
ATOM    898 2HB  PRO A  58      21.201   4.687-113.242  1.00  0.00           H  
ATOM    899 1HG  PRO A  58      21.771   3.166-110.666  1.00  0.00           H  
ATOM    900 2HG  PRO A  58      20.233   3.346-111.515  1.00  0.00           H  
ATOM    901 1HD  PRO A  58      21.746   1.112-111.828  1.00  0.00           H  
ATOM    902 2HD  PRO A  58      20.815   1.809-113.213  1.00  0.00           H  
ATOM    903  N   GLY A  59      25.392   4.659-112.846  1.00  0.00           N  
ATOM    904  CA  GLY A  59      26.628   5.035-112.196  1.00  0.00           C  
ATOM    905  C   GLY A  59      26.548   6.071-111.107  1.00  0.00           C  
ATOM    906  O   GLY A  59      27.157   5.941-110.044  1.00  0.00           O  
ATOM    907  H   GLY A  59      25.289   4.820-113.838  1.00  0.00           H  
ATOM    908 1HA  GLY A  59      27.087   4.152-111.749  1.00  0.00           H  
ATOM    909 2HA  GLY A  59      27.327   5.419-112.938  1.00  0.00           H  
ATOM    910  N   ASP A  60      25.891   7.182-111.383  1.00  0.00           N  
ATOM    911  CA  ASP A  60      25.601   8.308-110.417  1.00  0.00           C  
ATOM    912  C   ASP A  60      24.295   9.001-110.854  1.00  0.00           C  
ATOM    913  O   ASP A  60      23.683   8.557-111.840  1.00  0.00           O  
ATOM    914  CB  ASP A  60      26.743   9.327-110.374  1.00  0.00           C  
ATOM    915  CG  ASP A  60      26.981  10.007-111.715  1.00  0.00           C  
ATOM    916  OD1 ASP A  60      26.103   9.967-112.544  1.00  0.00           O  
ATOM    917  OD2 ASP A  60      28.040  10.560-111.899  1.00  0.00           O  
ATOM    918  H   ASP A  60      25.566   7.255-112.336  1.00  0.00           H  
ATOM    919  HA  ASP A  60      25.488   7.887-109.418  1.00  0.00           H  
ATOM    920 1HB  ASP A  60      26.519  10.092-109.630  1.00  0.00           H  
ATOM    921 2HB  ASP A  60      27.663   8.830-110.066  1.00  0.00           H  
ATOM    922  N   ASN A  61      23.844   9.985-110.090  1.00  0.00           N  
ATOM    923  CA  ASN A  61      22.579  10.633-110.410  1.00  0.00           C  
ATOM    924  C   ASN A  61      22.534  11.469-111.686  1.00  0.00           C  
ATOM    925  O   ASN A  61      21.484  11.687-112.362  1.00  0.00           O  
ATOM    926  CB  ASN A  61      22.160  11.495-109.233  1.00  0.00           C  
ATOM    927  CG  ASN A  61      21.704  10.681-108.054  1.00  0.00           C  
ATOM    928  OD1 ASN A  61      21.069   9.633-108.216  1.00  0.00           O  
ATOM    929  ND2 ASN A  61      22.016  11.143-106.870  1.00  0.00           N  
ATOM    930  H   ASN A  61      24.367  10.296-109.284  1.00  0.00           H  
ATOM    931  HA  ASN A  61      21.827   9.861-110.580  1.00  0.00           H  
ATOM    932 1HB  ASN A  61      22.997  12.123-108.925  1.00  0.00           H  
ATOM    933 2HB  ASN A  61      21.349  12.157-109.538  1.00  0.00           H  
ATOM    934 1HD2 ASN A  61      21.739  10.644-106.049  1.00  0.00           H  
ATOM    935 2HD2 ASN A  61      22.531  11.996-106.786  1.00  0.00           H  
ATOM    936  N   SER A  62      23.711  12.032-111.968  1.00  0.00           N  
ATOM    937  CA  SER A  62      23.907  12.829-113.281  1.00  0.00           C  
ATOM    938  C   SER A  62      23.785  11.901-114.557  1.00  0.00           C  
ATOM    939  O   SER A  62      23.058  12.223-115.512  1.00  0.00           O  
ATOM    940  CB  SER A  62      25.261  13.512-113.288  1.00  0.00           C  
ATOM    941  OG  SER A  62      25.455  14.229-114.477  1.00  0.00           O  
ATOM    942  H   SER A  62      24.485  11.943-111.326  1.00  0.00           H  
ATOM    943  HA  SER A  62      23.130  13.593-113.341  1.00  0.00           H  
ATOM    944 1HB  SER A  62      25.332  14.189-112.437  1.00  0.00           H  
ATOM    945 2HB  SER A  62      26.045  12.765-113.179  1.00  0.00           H  
ATOM    946  HG  SER A  62      26.004  13.673-115.034  1.00  0.00           H  
ATOM    947  N   SER A  63      24.472  10.757-114.568  1.00  0.00           N  
ATOM    948  CA  SER A  63      24.367   9.771-115.639  1.00  0.00           C  
ATOM    949  C   SER A  63      23.037   9.089-115.806  1.00  0.00           C  
ATOM    950  O   SER A  63      22.555   8.912-116.936  1.00  0.00           O  
ATOM    951  CB  SER A  63      25.421   8.702-115.425  1.00  0.00           C  
ATOM    952  OG  SER A  63      25.196   8.007-114.230  1.00  0.00           O  
ATOM    953  H   SER A  63      25.091  10.576-113.791  1.00  0.00           H  
ATOM    954  HA  SER A  63      24.547  10.273-116.590  1.00  0.00           H  
ATOM    955 1HB  SER A  63      25.407   8.005-116.263  1.00  0.00           H  
ATOM    956 2HB  SER A  63      26.407   9.164-115.401  1.00  0.00           H  
ATOM    957  HG  SER A  63      25.387   8.627-113.523  1.00  0.00           H  
ATOM    958  N   ALA A  64      22.282   8.939-114.670  1.00  0.00           N  
ATOM    959  CA  ALA A  64      20.880   8.425-114.650  1.00  0.00           C  
ATOM    960  C   ALA A  64      19.835   9.571-115.016  1.00  0.00           C  
ATOM    961  O   ALA A  64      18.858   9.252-115.692  1.00  0.00           O  
ATOM    962  CB  ALA A  64      20.616   7.799-113.256  1.00  0.00           C  
ATOM    963  H   ALA A  64      22.723   9.199-113.800  1.00  0.00           H  
ATOM    964  HA  ALA A  64      20.793   7.647-115.409  1.00  0.00           H  
ATOM    965 1HB  ALA A  64      19.597   7.416-113.217  1.00  0.00           H  
ATOM    966 2HB  ALA A  64      21.318   6.983-113.085  1.00  0.00           H  
ATOM    967 3HB  ALA A  64      20.748   8.558-112.487  1.00  0.00           H  
ATOM    968  N   GLY A  65      20.086  10.830-114.766  1.00  0.00           N  
ATOM    969  CA  GLY A  65      19.141  11.910-115.080  1.00  0.00           C  
ATOM    970  C   GLY A  65      18.051  12.160-114.069  1.00  0.00           C  
ATOM    971  O   GLY A  65      16.823  12.376-114.421  1.00  0.00           O  
ATOM    972  H   GLY A  65      20.971  11.060-114.338  1.00  0.00           H  
ATOM    973 1HA  GLY A  65      19.686  12.846-115.199  1.00  0.00           H  
ATOM    974 2HA  GLY A  65      18.651  11.700-116.030  1.00  0.00           H  
ATOM    975  N   VAL A  66      18.308  11.986-112.754  1.00  0.00           N  
ATOM    976  CA  VAL A  66      17.445  12.084-111.547  1.00  0.00           C  
ATOM    977  C   VAL A  66      17.979  13.048-110.503  1.00  0.00           C  
ATOM    978  O   VAL A  66      19.018  13.686-110.677  1.00  0.00           O  
ATOM    979  CB  VAL A  66      17.288  10.699-110.891  1.00  0.00           C  
ATOM    980  CG1 VAL A  66      16.632   9.723-111.856  1.00  0.00           C  
ATOM    981  CG2 VAL A  66      18.647  10.182-110.442  1.00  0.00           C  
ATOM    982  H   VAL A  66      19.283  11.749-112.643  1.00  0.00           H  
ATOM    983  HA  VAL A  66      16.460  12.440-111.853  1.00  0.00           H  
ATOM    984  HB  VAL A  66      16.630  10.789-110.027  1.00  0.00           H  
ATOM    985 1HG1 VAL A  66      16.529   8.750-111.375  1.00  0.00           H  
ATOM    986 2HG1 VAL A  66      15.646  10.096-112.135  1.00  0.00           H  
ATOM    987 3HG1 VAL A  66      17.249   9.623-112.748  1.00  0.00           H  
ATOM    988 1HG2 VAL A  66      18.529   9.203-109.979  1.00  0.00           H  
ATOM    989 2HG2 VAL A  66      19.307  10.098-111.306  1.00  0.00           H  
ATOM    990 3HG2 VAL A  66      19.080  10.875-109.721  1.00  0.00           H  
ATOM    991  N   ALA A  67      17.276  13.201-109.346  1.00  0.00           N  
ATOM    992  CA  ALA A  67      17.694  14.108-108.273  1.00  0.00           C  
ATOM    993  C   ALA A  67      19.106  13.770-107.679  1.00  0.00           C  
ATOM    994  O   ALA A  67      19.452  12.615-107.620  1.00  0.00           O  
ATOM    995  CB  ALA A  67      16.717  13.841-107.195  1.00  0.00           C  
ATOM    996  H   ALA A  67      16.430  12.661-109.231  1.00  0.00           H  
ATOM    997  HA  ALA A  67      17.774  15.112-108.690  1.00  0.00           H  
ATOM    998 1HB  ALA A  67      16.941  14.473-106.336  1.00  0.00           H  
ATOM    999 2HB  ALA A  67      15.711  14.058-107.554  1.00  0.00           H  
ATOM   1000 3HB  ALA A  67      16.779  12.794-106.900  1.00  0.00           H  
ATOM   1001  N   THR A  68      19.892  14.820-107.264  1.00  0.00           N  
ATOM   1002  CA  THR A  68      21.257  14.684-106.762  1.00  0.00           C  
ATOM   1003  C   THR A  68      21.385  14.365-105.241  1.00  0.00           C  
ATOM   1004  O   THR A  68      20.454  14.580-104.430  1.00  0.00           O  
ATOM   1005  CB  THR A  68      22.044  15.970-107.075  1.00  0.00           C  
ATOM   1006  OG1 THR A  68      21.467  17.072-106.362  1.00  0.00           O  
ATOM   1007  CG2 THR A  68      22.014  16.265-108.567  1.00  0.00           C  
ATOM   1008  H   THR A  68      19.477  15.739-107.318  1.00  0.00           H  
ATOM   1009  HA  THR A  68      21.730  13.842-107.269  1.00  0.00           H  
ATOM   1010  HB  THR A  68      23.079  15.850-106.755  1.00  0.00           H  
ATOM   1011  HG1 THR A  68      20.519  17.087-106.511  1.00  0.00           H  
ATOM   1012 1HG2 THR A  68      22.576  17.177-108.769  1.00  0.00           H  
ATOM   1013 2HG2 THR A  68      22.463  15.434-109.111  1.00  0.00           H  
ATOM   1014 3HG2 THR A  68      20.982  16.396-108.891  1.00  0.00           H  
ATOM   1015  N   SER A  69      22.694  14.085-104.909  1.00  0.00           N  
ATOM   1016  CA  SER A  69      23.115  13.793-103.516  1.00  0.00           C  
ATOM   1017  C   SER A  69      22.672  14.723-102.450  1.00  0.00           C  
ATOM   1018  O   SER A  69      22.279  14.295-101.387  1.00  0.00           O  
ATOM   1019  CB  SER A  69      24.629  13.733-103.450  1.00  0.00           C  
ATOM   1020  OG  SER A  69      25.120  12.633-104.166  1.00  0.00           O  
ATOM   1021  H   SER A  69      23.387  14.080-105.643  1.00  0.00           H  
ATOM   1022  HA  SER A  69      22.705  12.825-103.226  1.00  0.00           H  
ATOM   1023 1HB  SER A  69      25.048  14.653-103.859  1.00  0.00           H  
ATOM   1024 2HB  SER A  69      24.945  13.664-102.410  1.00  0.00           H  
ATOM   1025  HG  SER A  69      25.288  11.948-103.515  1.00  0.00           H  
ATOM   1026  N   ALA A  70      22.681  16.004-102.643  1.00  0.00           N  
ATOM   1027  CA  ALA A  70      22.167  17.048-101.817  1.00  0.00           C  
ATOM   1028  C   ALA A  70      20.608  17.293-101.845  1.00  0.00           C  
ATOM   1029  O   ALA A  70      20.146  18.064-101.046  1.00  0.00           O  
ATOM   1030  CB  ALA A  70      22.946  18.278-102.225  1.00  0.00           C  
ATOM   1031  H   ALA A  70      23.127  16.243-103.517  1.00  0.00           H  
ATOM   1032  HA  ALA A  70      22.366  16.787-100.777  1.00  0.00           H  
ATOM   1033 1HB  ALA A  70      22.613  19.133-101.635  1.00  0.00           H  
ATOM   1034 2HB  ALA A  70      24.009  18.110-102.050  1.00  0.00           H  
ATOM   1035 3HB  ALA A  70      22.780  18.480-103.282  1.00  0.00           H  
ATOM   1036  N   ASP A  71      19.852  16.736-102.875  1.00  0.00           N  
ATOM   1037  CA  ASP A  71      18.378  16.865-102.892  1.00  0.00           C  
ATOM   1038  C   ASP A  71      17.688  15.946-101.872  1.00  0.00           C  
ATOM   1039  O   ASP A  71      18.243  14.919-101.422  1.00  0.00           O  
ATOM   1040  CB  ASP A  71      17.836  16.559-104.291  1.00  0.00           C  
ATOM   1041  CG  ASP A  71      18.220  17.615-105.319  1.00  0.00           C  
ATOM   1042  OD1 ASP A  71      18.071  18.779-105.030  1.00  0.00           O  
ATOM   1043  OD2 ASP A  71      18.658  17.248-106.383  1.00  0.00           O  
ATOM   1044  H   ASP A  71      20.311  16.236-103.623  1.00  0.00           H  
ATOM   1045  HA  ASP A  71      18.117  17.892-102.632  1.00  0.00           H  
ATOM   1046 1HB  ASP A  71      18.215  15.593-104.625  1.00  0.00           H  
ATOM   1047 2HB  ASP A  71      16.749  16.489-104.253  1.00  0.00           H  
ATOM   1048  N   ILE A  72      16.450  16.259-101.362  1.00  0.00           N  
ATOM   1049  CA  ILE A  72      15.675  15.484-100.300  1.00  0.00           C  
ATOM   1050  C   ILE A  72      16.217  15.631 -98.935  1.00  0.00           C  
ATOM   1051  O   ILE A  72      15.685  14.951 -98.041  1.00  0.00           O  
ATOM   1052  CB  ILE A  72      15.634  13.975-100.604  1.00  0.00           C  
ATOM   1053  CG1 ILE A  72      14.893  13.716-101.919  1.00  0.00           C  
ATOM   1054  CG2 ILE A  72      14.975  13.219 -99.461  1.00  0.00           C  
ATOM   1055  CD1 ILE A  72      15.053  12.307-102.443  1.00  0.00           C  
ATOM   1056  H   ILE A  72      16.043  17.095-101.755  1.00  0.00           H  
ATOM   1057  HA  ILE A  72      14.649  15.851-100.283  1.00  0.00           H  
ATOM   1058  HB  ILE A  72      16.649  13.603-100.737  1.00  0.00           H  
ATOM   1059 1HG1 ILE A  72      13.830  13.911-101.782  1.00  0.00           H  
ATOM   1060 2HG1 ILE A  72      15.254  14.405-102.682  1.00  0.00           H  
ATOM   1061 1HG2 ILE A  72      14.954  12.155 -99.693  1.00  0.00           H  
ATOM   1062 2HG2 ILE A  72      15.542  13.379 -98.545  1.00  0.00           H  
ATOM   1063 3HG2 ILE A  72      13.956  13.581 -99.324  1.00  0.00           H  
ATOM   1064 1HD1 ILE A  72      14.500  12.201-103.376  1.00  0.00           H  
ATOM   1065 2HD1 ILE A  72      16.109  12.103-102.621  1.00  0.00           H  
ATOM   1066 3HD1 ILE A  72      14.665  11.601-101.710  1.00  0.00           H  
ATOM   1067  N   LYS A  73      17.135  16.609 -98.653  1.00  0.00           N  
ATOM   1068  CA  LYS A  73      17.753  16.768 -97.323  1.00  0.00           C  
ATOM   1069  C   LYS A  73      16.910  17.541 -96.318  1.00  0.00           C  
ATOM   1070  O   LYS A  73      17.009  18.826 -96.242  1.00  0.00           O  
ATOM   1071  CB  LYS A  73      19.112  17.454 -97.464  1.00  0.00           C  
ATOM   1072  CG  LYS A  73      19.906  17.550 -96.167  1.00  0.00           C  
ATOM   1073  CD  LYS A  73      21.276  18.167 -96.402  1.00  0.00           C  
ATOM   1074  CE  LYS A  73      22.098  18.196 -95.122  1.00  0.00           C  
ATOM   1075  NZ  LYS A  73      23.428  18.831 -95.328  1.00  0.00           N  
ATOM   1076  H   LYS A  73      17.393  17.244 -99.395  1.00  0.00           H  
ATOM   1077  HA  LYS A  73      17.898  15.778 -96.889  1.00  0.00           H  
ATOM   1078 1HB  LYS A  73      19.721  16.913 -98.189  1.00  0.00           H  
ATOM   1079 2HB  LYS A  73      18.972  18.466 -97.845  1.00  0.00           H  
ATOM   1080 1HG  LYS A  73      19.358  18.163 -95.450  1.00  0.00           H  
ATOM   1081 2HG  LYS A  73      20.033  16.554 -95.744  1.00  0.00           H  
ATOM   1082 1HD  LYS A  73      21.812  17.588 -97.155  1.00  0.00           H  
ATOM   1083 2HD  LYS A  73      21.158  19.186 -96.769  1.00  0.00           H  
ATOM   1084 1HE  LYS A  73      21.558  18.752 -94.356  1.00  0.00           H  
ATOM   1085 2HE  LYS A  73      22.248  17.178 -94.762  1.00  0.00           H  
ATOM   1086 1HZ  LYS A  73      23.940  18.831 -94.458  1.00  0.00           H  
ATOM   1087 2HZ  LYS A  73      23.945  18.312 -96.024  1.00  0.00           H  
ATOM   1088 3HZ  LYS A  73      23.302  19.783 -95.643  1.00  0.00           H  
ATOM   1089  N   GLY A  74      16.100  16.802 -95.599  1.00  0.00           N  
ATOM   1090  CA  GLY A  74      15.256  17.351 -94.588  1.00  0.00           C  
ATOM   1091  C   GLY A  74      14.981  16.330 -93.467  1.00  0.00           C  
ATOM   1092  O   GLY A  74      15.940  15.851 -92.797  1.00  0.00           O  
ATOM   1093  H   GLY A  74      16.077  15.807 -95.772  1.00  0.00           H  
ATOM   1094 1HA  GLY A  74      15.725  18.240 -94.166  1.00  0.00           H  
ATOM   1095 2HA  GLY A  74      14.313  17.666 -95.033  1.00  0.00           H  
ATOM   1096  N   LYS A  75      13.726  16.004 -93.247  1.00  0.00           N  
ATOM   1097  CA  LYS A  75      13.300  14.965 -92.249  1.00  0.00           C  
ATOM   1098  C   LYS A  75      14.081  13.639 -92.309  1.00  0.00           C  
ATOM   1099  O   LYS A  75      14.006  12.797 -93.193  1.00  0.00           O  
ATOM   1100  CB  LYS A  75      11.810  14.664 -92.419  1.00  0.00           C  
ATOM   1101  CG  LYS A  75      11.269  13.608 -91.465  1.00  0.00           C  
ATOM   1102  CD  LYS A  75       9.781  13.378 -91.681  1.00  0.00           C  
ATOM   1103  CE  LYS A  75       9.268  12.228 -90.828  1.00  0.00           C  
ATOM   1104  NZ  LYS A  75       7.816  11.982 -91.039  1.00  0.00           N  
ATOM   1105  H   LYS A  75      13.021  16.487 -93.785  1.00  0.00           H  
ATOM   1106  HA  LYS A  75      13.470  15.359 -91.246  1.00  0.00           H  
ATOM   1107 1HB  LYS A  75      11.235  15.578 -92.269  1.00  0.00           H  
ATOM   1108 2HB  LYS A  75      11.622  14.322 -93.437  1.00  0.00           H  
ATOM   1109 1HG  LYS A  75      11.800  12.669 -91.621  1.00  0.00           H  
ATOM   1110 2HG  LYS A  75      11.432  13.930 -90.436  1.00  0.00           H  
ATOM   1111 1HD  LYS A  75       9.231  14.284 -91.424  1.00  0.00           H  
ATOM   1112 2HD  LYS A  75       9.598  13.148 -92.731  1.00  0.00           H  
ATOM   1113 1HE  LYS A  75       9.817  11.320 -91.073  1.00  0.00           H  
ATOM   1114 2HE  LYS A  75       9.435  12.453 -89.775  1.00  0.00           H  
ATOM   1115 1HZ  LYS A  75       7.515  11.214 -90.456  1.00  0.00           H  
ATOM   1116 2HZ  LYS A  75       7.294  12.813 -90.796  1.00  0.00           H  
ATOM   1117 3HZ  LYS A  75       7.650  11.753 -92.009  1.00  0.00           H  
ATOM   1118  N   TYR A  76      15.045  13.534 -91.401  1.00  0.00           N  
ATOM   1119  CA  TYR A  76      15.934  12.352 -91.264  1.00  0.00           C  
ATOM   1120  C   TYR A  76      16.993  11.967 -92.353  1.00  0.00           C  
ATOM   1121  O   TYR A  76      18.022  11.377 -91.977  1.00  0.00           O  
ATOM   1122  CB  TYR A  76      15.026  11.139 -91.046  1.00  0.00           C  
ATOM   1123  CG  TYR A  76      14.101  11.274 -89.857  1.00  0.00           C  
ATOM   1124  CD1 TYR A  76      14.528  11.942 -88.719  1.00  0.00           C  
ATOM   1125  CD2 TYR A  76      12.826  10.730 -89.906  1.00  0.00           C  
ATOM   1126  CE1 TYR A  76      13.682  12.065 -87.633  1.00  0.00           C  
ATOM   1127  CE2 TYR A  76      11.981  10.853 -88.820  1.00  0.00           C  
ATOM   1128  CZ  TYR A  76      12.406  11.518 -87.687  1.00  0.00           C  
ATOM   1129  OH  TYR A  76      11.564  11.641 -86.606  1.00  0.00           O  
ATOM   1130  H   TYR A  76      15.167  14.316 -90.773  1.00  0.00           H  
ATOM   1131  HA  TYR A  76      16.579  12.503 -90.398  1.00  0.00           H  
ATOM   1132 1HB  TYR A  76      14.416  10.977 -91.936  1.00  0.00           H  
ATOM   1133 2HB  TYR A  76      15.638  10.249 -90.902  1.00  0.00           H  
ATOM   1134  HD1 TYR A  76      15.530  12.370 -88.681  1.00  0.00           H  
ATOM   1135  HD2 TYR A  76      12.491  10.204 -90.800  1.00  0.00           H  
ATOM   1136  HE1 TYR A  76      14.017  12.590 -86.739  1.00  0.00           H  
ATOM   1137  HE2 TYR A  76      10.979  10.425 -88.857  1.00  0.00           H  
ATOM   1138  HH  TYR A  76      10.710  11.258 -86.821  1.00  0.00           H  
ATOM   1139  N   VAL A  77      16.825  12.194 -93.694  1.00  0.00           N  
ATOM   1140  CA  VAL A  77      17.795  11.866 -94.720  1.00  0.00           C  
ATOM   1141  C   VAL A  77      18.747  13.064 -94.883  1.00  0.00           C  
ATOM   1142  O   VAL A  77      18.346  14.170 -95.197  1.00  0.00           O  
ATOM   1143  CB  VAL A  77      17.093  11.552 -96.055  1.00  0.00           C  
ATOM   1144  CG1 VAL A  77      18.119  11.256 -97.139  1.00  0.00           C  
ATOM   1145  CG2 VAL A  77      16.143  10.378 -95.877  1.00  0.00           C  
ATOM   1146  H   VAL A  77      15.951  12.623 -93.963  1.00  0.00           H  
ATOM   1147  HA  VAL A  77      18.348  10.981 -94.404  1.00  0.00           H  
ATOM   1148  HB  VAL A  77      16.531  12.429 -96.375  1.00  0.00           H  
ATOM   1149 1HG1 VAL A  77      17.606  11.036 -98.076  1.00  0.00           H  
ATOM   1150 2HG1 VAL A  77      18.765  12.123 -97.275  1.00  0.00           H  
ATOM   1151 3HG1 VAL A  77      18.720  10.396 -96.846  1.00  0.00           H  
ATOM   1152 1HG2 VAL A  77      15.650  10.161 -96.824  1.00  0.00           H  
ATOM   1153 2HG2 VAL A  77      16.704   9.501 -95.551  1.00  0.00           H  
ATOM   1154 3HG2 VAL A  77      15.392  10.627 -95.126  1.00  0.00           H  
ATOM   1155  N   GLN A  78      20.074  12.823 -94.710  1.00  0.00           N  
ATOM   1156  CA  GLN A  78      21.114  13.799 -94.958  1.00  0.00           C  
ATOM   1157  C   GLN A  78      21.771  13.722 -96.291  1.00  0.00           C  
ATOM   1158  O   GLN A  78      22.631  14.610 -96.549  1.00  0.00           O  
ATOM   1159  CB  GLN A  78      22.196  13.681 -93.881  1.00  0.00           C  
ATOM   1160  CG  GLN A  78      21.694  13.921 -92.467  1.00  0.00           C  
ATOM   1161  CD  GLN A  78      21.130  15.317 -92.282  1.00  0.00           C  
ATOM   1162  OE1 GLN A  78      21.828  16.316 -92.480  1.00  0.00           O  
ATOM   1163  NE2 GLN A  78      19.860  15.395 -91.901  1.00  0.00           N  
ATOM   1164  H   GLN A  78      20.331  11.901 -94.388  1.00  0.00           H  
ATOM   1165  HA  GLN A  78      20.673  14.795 -94.912  1.00  0.00           H  
ATOM   1166 1HB  GLN A  78      22.638  12.686 -93.916  1.00  0.00           H  
ATOM   1167 2HB  GLN A  78      22.990  14.400 -94.082  1.00  0.00           H  
ATOM   1168 1HG  GLN A  78      20.906  13.202 -92.245  1.00  0.00           H  
ATOM   1169 2HG  GLN A  78      22.524  13.793 -91.771  1.00  0.00           H  
ATOM   1170 1HE2 GLN A  78      19.433  16.290 -91.763  1.00  0.00           H  
ATOM   1171 2HE2 GLN A  78      19.330  14.561 -91.751  1.00  0.00           H  
ATOM   1172  N   SER A  79      21.530  12.729 -97.161  1.00  0.00           N  
ATOM   1173  CA  SER A  79      22.081  12.520 -98.486  1.00  0.00           C  
ATOM   1174  C   SER A  79      21.440  11.366 -99.209  1.00  0.00           C  
ATOM   1175  O   SER A  79      21.153  10.337 -98.591  1.00  0.00           O  
ATOM   1176  CB  SER A  79      23.576  12.283 -98.391  1.00  0.00           C  
ATOM   1177  OG  SER A  79      24.131  12.056 -99.657  1.00  0.00           O  
ATOM   1178  H   SER A  79      20.867  12.062 -96.794  1.00  0.00           H  
ATOM   1179  HA  SER A  79      21.902  13.417 -99.081  1.00  0.00           H  
ATOM   1180 1HB  SER A  79      24.053  13.148 -97.931  1.00  0.00           H  
ATOM   1181 2HB  SER A  79      23.767  11.425 -97.748  1.00  0.00           H  
ATOM   1182  HG  SER A  79      23.922  12.834-100.180  1.00  0.00           H  
ATOM   1183  N   VAL A  80      21.269  11.460-100.560  1.00  0.00           N  
ATOM   1184  CA  VAL A  80      20.634  10.441-101.453  1.00  0.00           C  
ATOM   1185  C   VAL A  80      21.480  10.044-102.726  1.00  0.00           C  
ATOM   1186  O   VAL A  80      21.003  10.119-103.888  1.00  0.00           O  
ATOM   1187  CB  VAL A  80      19.263  10.968-101.917  1.00  0.00           C  
ATOM   1188  CG1 VAL A  80      18.297  11.046-100.744  1.00  0.00           C  
ATOM   1189  CG2 VAL A  80      19.427  12.330-102.572  1.00  0.00           C  
ATOM   1190  H   VAL A  80      21.618  12.317-100.963  1.00  0.00           H  
ATOM   1191  HA  VAL A  80      20.494   9.521-100.883  1.00  0.00           H  
ATOM   1192  HB  VAL A  80      18.839  10.267-102.636  1.00  0.00           H  
ATOM   1193 1HG1 VAL A  80      17.333  11.420-101.090  1.00  0.00           H  
ATOM   1194 2HG1 VAL A  80      18.167  10.053-100.313  1.00  0.00           H  
ATOM   1195 3HG1 VAL A  80      18.697  11.721 -99.988  1.00  0.00           H  
ATOM   1196 1HG2 VAL A  80      18.454  12.697-102.899  1.00  0.00           H  
ATOM   1197 2HG2 VAL A  80      19.856  13.030-101.855  1.00  0.00           H  
ATOM   1198 3HG2 VAL A  80      20.089  12.243-103.434  1.00  0.00           H  
ATOM   1199  N   THR A  81      22.748   9.802-102.460  1.00  0.00           N  
ATOM   1200  CA  THR A  81      23.827   9.345-103.408  1.00  0.00           C  
ATOM   1201  C   THR A  81      23.642   7.969-104.061  1.00  0.00           C  
ATOM   1202  O   THR A  81      23.410   6.946-103.347  1.00  0.00           O  
ATOM   1203  CB  THR A  81      25.191   9.339-102.693  1.00  0.00           C  
ATOM   1204  OG1 THR A  81      25.497  10.660-102.230  1.00  0.00           O  
ATOM   1205  CG2 THR A  81      26.286   8.871-103.639  1.00  0.00           C  
ATOM   1206  H   THR A  81      22.979   9.956-101.489  1.00  0.00           H  
ATOM   1207  HA  THR A  81      23.871  10.044-104.244  1.00  0.00           H  
ATOM   1208  HB  THR A  81      25.148   8.668-101.835  1.00  0.00           H  
ATOM   1209  HG1 THR A  81      25.552  10.658-101.271  1.00  0.00           H  
ATOM   1210 1HG2 THR A  81      27.243   8.872-103.116  1.00  0.00           H  
ATOM   1211 2HG2 THR A  81      26.062   7.862-103.984  1.00  0.00           H  
ATOM   1212 3HG2 THR A  81      26.340   9.543-104.494  1.00  0.00           H  
ATOM   1213  N   VAL A  82      23.670   7.937-105.387  1.00  0.00           N  
ATOM   1214  CA  VAL A  82      23.575   6.653-106.105  1.00  0.00           C  
ATOM   1215  C   VAL A  82      24.917   6.248-106.670  1.00  0.00           C  
ATOM   1216  O   VAL A  82      25.587   7.112-107.270  1.00  0.00           O  
ATOM   1217  CB  VAL A  82      22.554   6.744-107.254  1.00  0.00           C  
ATOM   1218  CG1 VAL A  82      22.540   5.453-108.058  1.00  0.00           C  
ATOM   1219  CG2 VAL A  82      21.171   7.046-106.696  1.00  0.00           C  
ATOM   1220  H   VAL A  82      23.756   8.792-105.918  1.00  0.00           H  
ATOM   1221  HA  VAL A  82      23.239   5.889-105.403  1.00  0.00           H  
ATOM   1222  HB  VAL A  82      22.855   7.542-107.933  1.00  0.00           H  
ATOM   1223 1HG1 VAL A  82      21.813   5.535-108.867  1.00  0.00           H  
ATOM   1224 2HG1 VAL A  82      23.530   5.275-108.478  1.00  0.00           H  
ATOM   1225 3HG1 VAL A  82      22.266   4.622-107.408  1.00  0.00           H  
ATOM   1226 1HG2 VAL A  82      20.455   7.110-107.514  1.00  0.00           H  
ATOM   1227 2HG2 VAL A  82      20.873   6.251-106.013  1.00  0.00           H  
ATOM   1228 3HG2 VAL A  82      21.195   7.995-106.160  1.00  0.00           H  
ATOM   1229  N   ALA A  83      25.287   4.974-106.572  1.00  0.00           N  
ATOM   1230  CA  ALA A  83      26.599   4.398-107.035  1.00  0.00           C  
ATOM   1231  C   ALA A  83      26.422   3.048-107.765  1.00  0.00           C  
ATOM   1232  O   ALA A  83      26.156   2.053-107.132  1.00  0.00           O  
ATOM   1233  CB  ALA A  83      27.545   4.421-105.827  1.00  0.00           C  
ATOM   1234  H   ALA A  83      24.605   4.364-106.145  1.00  0.00           H  
ATOM   1235  HA  ALA A  83      27.043   5.095-107.745  1.00  0.00           H  
ATOM   1236 1HB  ALA A  83      28.513   4.011-106.115  1.00  0.00           H  
ATOM   1237 2HB  ALA A  83      27.673   5.448-105.485  1.00  0.00           H  
ATOM   1238 3HB  ALA A  83      27.122   3.821-105.023  1.00  0.00           H  
ATOM   1239  N   ASN A  84      26.525   3.041-109.062  1.00  0.00           N  
ATOM   1240  CA  ASN A  84      26.441   1.833-109.966  1.00  0.00           C  
ATOM   1241  C   ASN A  84      25.145   0.951-109.602  1.00  0.00           C  
ATOM   1242  O   ASN A  84      25.219  -0.281-109.454  1.00  0.00           O  
ATOM   1243  CB  ASN A  84      27.712   1.010-109.868  1.00  0.00           C  
ATOM   1244  CG  ASN A  84      28.914   1.736-110.405  1.00  0.00           C  
ATOM   1245  OD1 ASN A  84      28.875   2.298-111.506  1.00  0.00           O  
ATOM   1246  ND2 ASN A  84      29.982   1.737-109.649  1.00  0.00           N  
ATOM   1247  H   ASN A  84      26.675   3.952-109.471  1.00  0.00           H  
ATOM   1248  HA  ASN A  84      26.326   2.178-110.995  1.00  0.00           H  
ATOM   1249 1HB  ASN A  84      27.897   0.747-108.826  1.00  0.00           H  
ATOM   1250 2HB  ASN A  84      27.587   0.080-110.423  1.00  0.00           H  
ATOM   1251 1HD2 ASN A  84      30.812   2.204-109.955  1.00  0.00           H  
ATOM   1252 2HD2 ASN A  84      29.969   1.269-108.765  1.00  0.00           H  
ATOM   1253  N   GLY A  85      23.915   1.544-109.473  1.00  0.00           N  
ATOM   1254  CA  GLY A  85      22.643   0.826-109.197  1.00  0.00           C  
ATOM   1255  C   GLY A  85      22.400   0.525-107.685  1.00  0.00           C  
ATOM   1256  O   GLY A  85      21.598  -0.309-107.328  1.00  0.00           O  
ATOM   1257  H   GLY A  85      23.900   2.549-109.578  1.00  0.00           H  
ATOM   1258 1HA  GLY A  85      21.804   1.416-109.566  1.00  0.00           H  
ATOM   1259 2HA  GLY A  85      22.634  -0.119-109.739  1.00  0.00           H  
ATOM   1260  N   VAL A  86      23.210   1.090-106.799  1.00  0.00           N  
ATOM   1261  CA  VAL A  86      23.084   0.936-105.347  1.00  0.00           C  
ATOM   1262  C   VAL A  86      22.752   2.352-104.848  1.00  0.00           C  
ATOM   1263  O   VAL A  86      23.291   3.344-105.354  1.00  0.00           O  
ATOM   1264  CB  VAL A  86      24.381   0.410-104.704  1.00  0.00           C  
ATOM   1265  CG1 VAL A  86      24.225   0.313-103.193  1.00  0.00           C  
ATOM   1266  CG2 VAL A  86      24.740  -0.944-105.296  1.00  0.00           C  
ATOM   1267  H   VAL A  86      23.956   1.661-107.171  1.00  0.00           H  
ATOM   1268  HA  VAL A  86      22.293   0.214-105.143  1.00  0.00           H  
ATOM   1269  HB  VAL A  86      25.186   1.118-104.899  1.00  0.00           H  
ATOM   1270 1HG1 VAL A  86      25.150  -0.061-102.755  1.00  0.00           H  
ATOM   1271 2HG1 VAL A  86      24.004   1.300-102.787  1.00  0.00           H  
ATOM   1272 3HG1 VAL A  86      23.410  -0.370-102.955  1.00  0.00           H  
ATOM   1273 1HG2 VAL A  86      25.658  -1.310-104.838  1.00  0.00           H  
ATOM   1274 2HG2 VAL A  86      23.932  -1.651-105.106  1.00  0.00           H  
ATOM   1275 3HG2 VAL A  86      24.887  -0.843-106.372  1.00  0.00           H  
ATOM   1276  N   ILE A  87      21.763   2.500-104.017  1.00  0.00           N  
ATOM   1277  CA  ILE A  87      21.294   3.798-103.426  1.00  0.00           C  
ATOM   1278  C   ILE A  87      21.723   3.844-101.946  1.00  0.00           C  
ATOM   1279  O   ILE A  87      21.123   3.114-101.180  1.00  0.00           O  
ATOM   1280  CB  ILE A  87      19.766   3.961-103.531  1.00  0.00           C  
ATOM   1281  CG1 ILE A  87      19.319   3.870-104.993  1.00  0.00           C  
ATOM   1282  CG2 ILE A  87      19.329   5.283-102.919  1.00  0.00           C  
ATOM   1283  CD1 ILE A  87      17.827   3.701-105.165  1.00  0.00           C  
ATOM   1284  H   ILE A  87      21.288   1.644-103.767  1.00  0.00           H  
ATOM   1285  HA  ILE A  87      21.757   4.616-103.976  1.00  0.00           H  
ATOM   1286  HB  ILE A  87      19.276   3.146-103.000  1.00  0.00           H  
ATOM   1287 1HG1 ILE A  87      19.624   4.772-105.523  1.00  0.00           H  
ATOM   1288 2HG1 ILE A  87      19.815   3.026-105.473  1.00  0.00           H  
ATOM   1289 1HG2 ILE A  87      18.248   5.383-103.003  1.00  0.00           H  
ATOM   1290 2HG2 ILE A  87      19.616   5.309-101.868  1.00  0.00           H  
ATOM   1291 3HG2 ILE A  87      19.812   6.106-103.447  1.00  0.00           H  
ATOM   1292 1HD1 ILE A  87      17.588   3.644-106.227  1.00  0.00           H  
ATOM   1293 2HD1 ILE A  87      17.505   2.783-104.671  1.00  0.00           H  
ATOM   1294 3HD1 ILE A  87      17.311   4.552-104.723  1.00  0.00           H  
ATOM   1295  N   THR A  88      22.585   4.799-101.531  1.00  0.00           N  
ATOM   1296  CA  THR A  88      23.074   4.978-100.164  1.00  0.00           C  
ATOM   1297  C   THR A  88      22.559   6.286 -99.551  1.00  0.00           C  
ATOM   1298  O   THR A  88      22.684   7.379-100.192  1.00  0.00           O  
ATOM   1299  CB  THR A  88      24.613   4.959-100.123  1.00  0.00           C  
ATOM   1300  OG1 THR A  88      25.091   3.697-100.608  1.00  0.00           O  
ATOM   1301  CG2 THR A  88      25.112   5.174 -98.702  1.00  0.00           C  
ATOM   1302  H   THR A  88      22.901   5.430-102.253  1.00  0.00           H  
ATOM   1303  HA  THR A  88      22.703   4.155 -99.553  1.00  0.00           H  
ATOM   1304  HB  THR A  88      25.004   5.750-100.763  1.00  0.00           H  
ATOM   1305  HG1 THR A  88      24.741   2.991-100.059  1.00  0.00           H  
ATOM   1306 1HG2 THR A  88      26.201   5.157 -98.693  1.00  0.00           H  
ATOM   1307 2HG2 THR A  88      24.760   6.137 -98.335  1.00  0.00           H  
ATOM   1308 3HG2 THR A  88      24.732   4.380 -98.060  1.00  0.00           H  
ATOM   1309  N   ALA A  89      22.018   6.203 -98.357  1.00  0.00           N  
ATOM   1310  CA  ALA A  89      21.456   7.384 -97.707  1.00  0.00           C  
ATOM   1311  C   ALA A  89      21.961   7.465 -96.245  1.00  0.00           C  
ATOM   1312  O   ALA A  89      22.163   6.390 -95.614  1.00  0.00           O  
ATOM   1313  CB  ALA A  89      19.909   7.348 -97.902  1.00  0.00           C  
ATOM   1314  H   ALA A  89      21.987   5.315 -97.877  1.00  0.00           H  
ATOM   1315  HA  ALA A  89      21.805   8.266 -98.245  1.00  0.00           H  
ATOM   1316 1HB  ALA A  89      19.461   8.220 -97.425  1.00  0.00           H  
ATOM   1317 2HB  ALA A  89      19.677   7.357 -98.967  1.00  0.00           H  
ATOM   1318 3HB  ALA A  89      19.507   6.442 -97.451  1.00  0.00           H  
ATOM   1319  N   GLN A  90      22.112   8.655 -95.646  1.00  0.00           N  
ATOM   1320  CA  GLN A  90      22.592   8.863 -94.280  1.00  0.00           C  
ATOM   1321  C   GLN A  90      21.505   9.423 -93.338  1.00  0.00           C  
ATOM   1322  O   GLN A  90      20.681  10.279 -93.691  1.00  0.00           O  
ATOM   1323  CB  GLN A  90      23.800   9.804 -94.294  1.00  0.00           C  
ATOM   1324  CG  GLN A  90      24.434  10.024 -92.932  1.00  0.00           C  
ATOM   1325  CD  GLN A  90      25.689  10.872 -93.007  1.00  0.00           C  
ATOM   1326  OE1 GLN A  90      25.870  11.655 -93.944  1.00  0.00           O  
ATOM   1327  NE2 GLN A  90      26.565  10.721 -92.020  1.00  0.00           N  
ATOM   1328  H   GLN A  90      21.866   9.456 -96.209  1.00  0.00           H  
ATOM   1329  HA  GLN A  90      22.898   7.900 -93.870  1.00  0.00           H  
ATOM   1330 1HB  GLN A  90      24.564   9.405 -94.961  1.00  0.00           H  
ATOM   1331 2HB  GLN A  90      23.499  10.776 -94.686  1.00  0.00           H  
ATOM   1332 1HG  GLN A  90      23.717  10.531 -92.286  1.00  0.00           H  
ATOM   1333 2HG  GLN A  90      24.700   9.056 -92.506  1.00  0.00           H  
ATOM   1334 1HE2 GLN A  90      27.412  11.254 -92.016  1.00  0.00           H  
ATOM   1335 2HE2 GLN A  90      26.378  10.075 -91.280  1.00  0.00           H  
ATOM   1336  N   MET A  91      21.398   8.902 -92.140  1.00  0.00           N  
ATOM   1337  CA  MET A  91      20.470   9.388 -91.106  1.00  0.00           C  
ATOM   1338  C   MET A  91      20.893  10.744 -90.411  1.00  0.00           C  
ATOM   1339  O   MET A  91      22.047  10.894 -90.177  1.00  0.00           O  
ATOM   1340  CB  MET A  91      20.299   8.291 -90.057  1.00  0.00           C  
ATOM   1341  CG  MET A  91      19.371   8.658 -88.907  1.00  0.00           C  
ATOM   1342  SD  MET A  91      17.692   9.022 -89.457  1.00  0.00           S  
ATOM   1343  CE  MET A  91      17.124   7.386 -89.914  1.00  0.00           C  
ATOM   1344  H   MET A  91      21.999   8.117 -91.933  1.00  0.00           H  
ATOM   1345  HA  MET A  91      19.509   9.599 -91.575  1.00  0.00           H  
ATOM   1346 1HB  MET A  91      19.904   7.393 -90.531  1.00  0.00           H  
ATOM   1347 2HB  MET A  91      21.271   8.037 -89.634  1.00  0.00           H  
ATOM   1348 1HG  MET A  91      19.330   7.834 -88.196  1.00  0.00           H  
ATOM   1349 2HG  MET A  91      19.762   9.534 -88.390  1.00  0.00           H  
ATOM   1350 1HE  MET A  91      16.097   7.446 -90.275  1.00  0.00           H  
ATOM   1351 2HE  MET A  91      17.764   6.985 -90.701  1.00  0.00           H  
ATOM   1352 3HE  MET A  91      17.165   6.730 -89.044  1.00  0.00           H  
ATOM   1353  N   ALA A  92      19.908  11.598 -89.990  1.00  0.00           N  
ATOM   1354  CA  ALA A  92      20.089  12.826 -89.333  1.00  0.00           C  
ATOM   1355  C   ALA A  92      20.997  12.690 -88.066  1.00  0.00           C  
ATOM   1356  O   ALA A  92      20.987  11.699 -87.310  1.00  0.00           O  
ATOM   1357  CB  ALA A  92      18.791  13.478 -88.893  1.00  0.00           C  
ATOM   1358  H   ALA A  92      18.970  11.280 -90.190  1.00  0.00           H  
ATOM   1359  HA  ALA A  92      20.605  13.502 -90.015  1.00  0.00           H  
ATOM   1360 1HB  ALA A  92      19.009  14.422 -88.393  1.00  0.00           H  
ATOM   1361 2HB  ALA A  92      18.164  13.666 -89.765  1.00  0.00           H  
ATOM   1362 3HB  ALA A  92      18.266  12.816 -88.206  1.00  0.00           H  
ATOM   1363  N   SER A  93      21.824  13.701 -87.819  1.00  0.00           N  
ATOM   1364  CA  SER A  93      22.626  13.793 -86.641  1.00  0.00           C  
ATOM   1365  C   SER A  93      21.945  14.231 -85.365  1.00  0.00           C  
ATOM   1366  O   SER A  93      22.565  14.246 -84.286  1.00  0.00           O  
ATOM   1367  CB  SER A  93      23.772  14.743 -86.929  1.00  0.00           C  
ATOM   1368  OG  SER A  93      23.308  16.056 -87.087  1.00  0.00           O  
ATOM   1369  H   SER A  93      21.877  14.436 -88.509  1.00  0.00           H  
ATOM   1370  HA  SER A  93      23.017  12.801 -86.410  1.00  0.00           H  
ATOM   1371 1HB  SER A  93      24.491  14.704 -86.111  1.00  0.00           H  
ATOM   1372 2HB  SER A  93      24.289  14.426 -87.834  1.00  0.00           H  
ATOM   1373  HG  SER A  93      24.069  16.624 -86.942  1.00  0.00           H  
ATOM   1374  N   SER A  94      20.678  14.761 -85.482  1.00  0.00           N  
ATOM   1375  CA  SER A  94      19.954  15.217 -84.310  1.00  0.00           C  
ATOM   1376  C   SER A  94      18.433  14.734 -84.443  1.00  0.00           C  
ATOM   1377  O   SER A  94      17.897  14.404 -85.519  1.00  0.00           O  
ATOM   1378  CB  SER A  94      20.056  16.725 -84.197  1.00  0.00           C  
ATOM   1379  OG  SER A  94      19.391  17.354 -85.258  1.00  0.00           O  
ATOM   1380  H   SER A  94      20.242  14.836 -86.390  1.00  0.00           H  
ATOM   1381  HA  SER A  94      20.405  14.764 -83.426  1.00  0.00           H  
ATOM   1382 1HB  SER A  94      19.624  17.049 -83.251  1.00  0.00           H  
ATOM   1383 2HB  SER A  94      21.104  17.020 -84.196  1.00  0.00           H  
ATOM   1384  HG  SER A  94      20.068  17.569 -85.905  1.00  0.00           H  
ATOM   1385  N   ASN A  95      17.757  14.862 -83.294  1.00  0.00           N  
ATOM   1386  CA  ASN A  95      16.464  14.405 -83.071  1.00  0.00           C  
ATOM   1387  C   ASN A  95      16.090  12.921 -83.419  1.00  0.00           C  
ATOM   1388  O   ASN A  95      14.930  12.494 -83.492  1.00  0.00           O  
ATOM   1389  CB  ASN A  95      15.551  15.369 -83.806  1.00  0.00           C  
ATOM   1390  CG  ASN A  95      15.584  16.754 -83.223  1.00  0.00           C  
ATOM   1391  OD1 ASN A  95      15.584  16.926 -81.998  1.00  0.00           O  
ATOM   1392  ND2 ASN A  95      15.611  17.747 -84.075  1.00  0.00           N  
ATOM   1393  H   ASN A  95      18.248  15.332 -82.546  1.00  0.00           H  
ATOM   1394  HA  ASN A  95      16.268  14.427 -81.998  1.00  0.00           H  
ATOM   1395 1HB  ASN A  95      15.847  15.422 -84.855  1.00  0.00           H  
ATOM   1396 2HB  ASN A  95      14.527  14.998 -83.773  1.00  0.00           H  
ATOM   1397 1HD2 ASN A  95      15.633  18.690 -83.744  1.00  0.00           H  
ATOM   1398 2HD2 ASN A  95      15.609  17.562 -85.058  1.00  0.00           H  
ATOM   1399  N   VAL A  96      17.037  12.017 -83.420  1.00  0.00           N  
ATOM   1400  CA  VAL A  96      16.838  10.590 -83.668  1.00  0.00           C  
ATOM   1401  C   VAL A  96      17.444   9.750 -82.576  1.00  0.00           C  
ATOM   1402  O   VAL A  96      18.304  10.252 -81.870  1.00  0.00           O  
ATOM   1403  CB  VAL A  96      17.462  10.184 -85.016  1.00  0.00           C  
ATOM   1404  CG1 VAL A  96      16.818  10.959 -86.156  1.00  0.00           C  
ATOM   1405  CG2 VAL A  96      18.964  10.420 -84.984  1.00  0.00           C  
ATOM   1406  H   VAL A  96      17.969  12.358 -83.233  1.00  0.00           H  
ATOM   1407  HA  VAL A  96      15.766  10.392 -83.706  1.00  0.00           H  
ATOM   1408  HB  VAL A  96      17.263   9.126 -85.194  1.00  0.00           H  
ATOM   1409 1HG1 VAL A  96      17.271  10.659 -87.101  1.00  0.00           H  
ATOM   1410 2HG1 VAL A  96      15.749  10.746 -86.182  1.00  0.00           H  
ATOM   1411 3HG1 VAL A  96      16.973  12.026 -86.003  1.00  0.00           H  
ATOM   1412 1HG2 VAL A  96      19.398  10.129 -85.940  1.00  0.00           H  
ATOM   1413 2HG2 VAL A  96      19.162  11.476 -84.800  1.00  0.00           H  
ATOM   1414 3HG2 VAL A  96      19.409   9.823 -84.187  1.00  0.00           H  
ATOM   1415  N   ASN A  97      17.047   8.487 -82.404  1.00  0.00           N  
ATOM   1416  CA  ASN A  97      17.601   7.550 -81.332  1.00  0.00           C  
ATOM   1417  C   ASN A  97      19.185   7.410 -81.467  1.00  0.00           C  
ATOM   1418  O   ASN A  97      19.680   7.275 -82.605  1.00  0.00           O  
ATOM   1419  CB  ASN A  97      16.933   6.190 -81.410  1.00  0.00           C  
ATOM   1420  CG  ASN A  97      15.487   6.232 -81.000  1.00  0.00           C  
ATOM   1421  OD1 ASN A  97      14.996   7.256 -80.512  1.00  0.00           O  
ATOM   1422  ND2 ASN A  97      14.794   5.138 -81.189  1.00  0.00           N  
ATOM   1423  H   ASN A  97      16.334   8.147 -83.034  1.00  0.00           H  
ATOM   1424  HA  ASN A  97      17.392   7.983 -80.352  1.00  0.00           H  
ATOM   1425 1HB  ASN A  97      16.998   5.810 -82.430  1.00  0.00           H  
ATOM   1426 2HB  ASN A  97      17.460   5.487 -80.764  1.00  0.00           H  
ATOM   1427 1HD2 ASN A  97      13.827   5.108 -80.936  1.00  0.00           H  
ATOM   1428 2HD2 ASN A  97      15.231   4.332 -81.587  1.00  0.00           H  
ATOM   1429  N   ASN A  98      19.928   7.566 -80.370  1.00  0.00           N  
ATOM   1430  CA  ASN A  98      21.376   7.508 -80.430  1.00  0.00           C  
ATOM   1431  C   ASN A  98      21.993   6.397 -81.365  1.00  0.00           C  
ATOM   1432  O   ASN A  98      22.955   6.697 -82.027  1.00  0.00           O  
ATOM   1433  CB  ASN A  98      21.898   7.354 -79.013  1.00  0.00           C  
ATOM   1434  CG  ASN A  98      23.392   7.501 -78.929  1.00  0.00           C  
ATOM   1435  OD1 ASN A  98      23.941   8.570 -79.219  1.00  0.00           O  
ATOM   1436  ND2 ASN A  98      24.061   6.446 -78.538  1.00  0.00           N  
ATOM   1437  H   ASN A  98      19.479   7.727 -79.480  1.00  0.00           H  
ATOM   1438  HA  ASN A  98      21.742   8.441 -80.860  1.00  0.00           H  
ATOM   1439 1HB  ASN A  98      21.435   8.104 -78.371  1.00  0.00           H  
ATOM   1440 2HB  ASN A  98      21.619   6.374 -78.626  1.00  0.00           H  
ATOM   1441 1HD2 ASN A  98      25.058   6.486 -78.463  1.00  0.00           H  
ATOM   1442 2HD2 ASN A  98      23.576   5.602 -78.313  1.00  0.00           H  
ATOM   1443  N   GLU A  99      21.410   5.199 -81.429  1.00  0.00           N  
ATOM   1444  CA  GLU A  99      21.951   4.028 -82.163  1.00  0.00           C  
ATOM   1445  C   GLU A  99      22.003   4.231 -83.692  1.00  0.00           C  
ATOM   1446  O   GLU A  99      22.838   3.552 -84.340  1.00  0.00           O  
ATOM   1447  CB  GLU A  99      21.114   2.786 -81.849  1.00  0.00           C  
ATOM   1448  CG  GLU A  99      21.222   2.301 -80.411  1.00  0.00           C  
ATOM   1449  CD  GLU A  99      20.339   3.067 -79.467  1.00  0.00           C  
ATOM   1450  OE1 GLU A  99      19.625   3.930 -79.919  1.00  0.00           O  
ATOM   1451  OE2 GLU A  99      20.378   2.790 -78.291  1.00  0.00           O  
ATOM   1452  H   GLU A  99      20.535   5.108 -80.932  1.00  0.00           H  
ATOM   1453  HA  GLU A  99      22.976   3.856 -81.833  1.00  0.00           H  
ATOM   1454 1HB  GLU A  99      20.063   2.994 -82.054  1.00  0.00           H  
ATOM   1455 2HB  GLU A  99      21.418   1.967 -82.502  1.00  0.00           H  
ATOM   1456 1HG  GLU A  99      20.948   1.247 -80.372  1.00  0.00           H  
ATOM   1457 2HG  GLU A  99      22.258   2.390 -80.086  1.00  0.00           H  
ATOM   1458  N   ILE A 100      21.255   5.233 -84.221  1.00  0.00           N  
ATOM   1459  CA  ILE A 100      21.186   5.613 -85.623  1.00  0.00           C  
ATOM   1460  C   ILE A 100      21.678   7.066 -85.968  1.00  0.00           C  
ATOM   1461  O   ILE A 100      21.576   7.487 -87.144  1.00  0.00           O  
ATOM   1462  CB  ILE A 100      19.735   5.443 -86.109  1.00  0.00           C  
ATOM   1463  CG1 ILE A 100      18.796   6.357 -85.317  1.00  0.00           C  
ATOM   1464  CG2 ILE A 100      19.300   3.991 -85.986  1.00  0.00           C  
ATOM   1465  CD1 ILE A 100      17.397   6.432 -85.884  1.00  0.00           C  
ATOM   1466  H   ILE A 100      20.704   5.743 -83.545  1.00  0.00           H  
ATOM   1467  HA  ILE A 100      21.841   4.954 -86.192  1.00  0.00           H  
ATOM   1468  HB  ILE A 100      19.664   5.747 -87.153  1.00  0.00           H  
ATOM   1469 1HG1 ILE A 100      18.729   6.005 -84.288  1.00  0.00           H  
ATOM   1470 2HG1 ILE A 100      19.207   7.366 -85.291  1.00  0.00           H  
ATOM   1471 1HG2 ILE A 100      18.272   3.889 -86.334  1.00  0.00           H  
ATOM   1472 2HG2 ILE A 100      19.952   3.363 -86.592  1.00  0.00           H  
ATOM   1473 3HG2 ILE A 100      19.363   3.679 -84.944  1.00  0.00           H  
ATOM   1474 1HD1 ILE A 100      16.791   7.099 -85.269  1.00  0.00           H  
ATOM   1475 2HD1 ILE A 100      17.437   6.816 -86.904  1.00  0.00           H  
ATOM   1476 3HD1 ILE A 100      16.952   5.438 -85.888  1.00  0.00           H  
ATOM   1477  N   LYS A 101      22.260   7.757 -85.007  1.00  0.00           N  
ATOM   1478  CA  LYS A 101      22.682   9.110 -85.300  1.00  0.00           C  
ATOM   1479  C   LYS A 101      23.833   9.172 -86.352  1.00  0.00           C  
ATOM   1480  O   LYS A 101      24.874   8.418 -86.283  1.00  0.00           O  
ATOM   1481  CB  LYS A 101      23.107   9.799 -84.002  1.00  0.00           C  
ATOM   1482  CG  LYS A 101      21.956  10.144 -83.067  1.00  0.00           C  
ATOM   1483  CD  LYS A 101      22.456  10.835 -81.807  1.00  0.00           C  
ATOM   1484  CE  LYS A 101      21.306  11.186 -80.874  1.00  0.00           C  
ATOM   1485  NZ  LYS A 101      21.788  11.770 -79.593  1.00  0.00           N  
ATOM   1486  H   LYS A 101      22.420   7.380 -84.084  1.00  0.00           H  
ATOM   1487  HA  LYS A 101      21.838   9.650 -85.733  1.00  0.00           H  
ATOM   1488 1HB  LYS A 101      23.798   9.155 -83.458  1.00  0.00           H  
ATOM   1489 2HB  LYS A 101      23.636  10.723 -84.237  1.00  0.00           H  
ATOM   1490 1HG  LYS A 101      21.255  10.804 -83.579  1.00  0.00           H  
ATOM   1491 2HG  LYS A 101      21.429   9.232 -82.786  1.00  0.00           H  
ATOM   1492 1HD  LYS A 101      23.151  10.177 -81.282  1.00  0.00           H  
ATOM   1493 2HD  LYS A 101      22.983  11.749 -82.078  1.00  0.00           H  
ATOM   1494 1HE  LYS A 101      20.648  11.904 -81.362  1.00  0.00           H  
ATOM   1495 2HE  LYS A 101      20.728  10.288 -80.654  1.00  0.00           H  
ATOM   1496 1HZ  LYS A 101      20.997  11.989 -79.003  1.00  0.00           H  
ATOM   1497 2HZ  LYS A 101      22.385  11.105 -79.122  1.00  0.00           H  
ATOM   1498 3HZ  LYS A 101      22.309  12.615 -79.782  1.00  0.00           H  
ATOM   1499  N   SER A 102      23.643  10.020 -87.373  1.00  0.00           N  
ATOM   1500  CA  SER A 102      24.636  10.270 -88.452  1.00  0.00           C  
ATOM   1501  C   SER A 102      25.097   8.907 -89.100  1.00  0.00           C  
ATOM   1502  O   SER A 102      26.220   8.859 -89.566  1.00  0.00           O  
ATOM   1503  CB  SER A 102      25.830  11.021 -87.895  1.00  0.00           C  
ATOM   1504  OG  SER A 102      25.440  12.252 -87.351  1.00  0.00           O  
ATOM   1505  H   SER A 102      22.761  10.511 -87.393  1.00  0.00           H  
ATOM   1506  HA  SER A 102      24.164  10.881 -89.222  1.00  0.00           H  
ATOM   1507 1HB  SER A 102      26.313  10.418 -87.126  1.00  0.00           H  
ATOM   1508 2HB  SER A 102      26.558  11.185 -88.687  1.00  0.00           H  
ATOM   1509  HG  SER A 102      26.142  12.510 -86.749  1.00  0.00           H  
ATOM   1510  N   LYS A 103      24.305   7.843 -89.168  1.00  0.00           N  
ATOM   1511  CA  LYS A 103      24.593   6.485 -89.790  1.00  0.00           C  
ATOM   1512  C   LYS A 103      23.855   6.182 -91.060  1.00  0.00           C  
ATOM   1513  O   LYS A 103      22.724   6.596 -91.196  1.00  0.00           O  
ATOM   1514  CB  LYS A 103      24.283   5.362 -88.798  1.00  0.00           C  
ATOM   1515  CG  LYS A 103      25.212   5.313 -87.593  1.00  0.00           C  
ATOM   1516  CD  LYS A 103      24.900   4.119 -86.703  1.00  0.00           C  
ATOM   1517  CE  LYS A 103      25.829   4.067 -85.499  1.00  0.00           C  
ATOM   1518  NZ  LYS A 103      25.520   2.917 -84.607  1.00  0.00           N  
ATOM   1519  H   LYS A 103      23.406   8.006 -88.737  1.00  0.00           H  
ATOM   1520  HA  LYS A 103      25.652   6.440 -90.046  1.00  0.00           H  
ATOM   1521 1HB  LYS A 103      23.263   5.473 -88.430  1.00  0.00           H  
ATOM   1522 2HB  LYS A 103      24.344   4.400 -89.308  1.00  0.00           H  
ATOM   1523 1HG  LYS A 103      26.246   5.242 -87.933  1.00  0.00           H  
ATOM   1524 2HG  LYS A 103      25.102   6.228 -87.011  1.00  0.00           H  
ATOM   1525 1HD  LYS A 103      23.869   4.185 -86.353  1.00  0.00           H  
ATOM   1526 2HD  LYS A 103      25.012   3.199 -87.276  1.00  0.00           H  
ATOM   1527 1HE  LYS A 103      26.860   3.981 -85.839  1.00  0.00           H  
ATOM   1528 2HE  LYS A 103      25.735   4.990 -84.927  1.00  0.00           H  
ATOM   1529 1HZ  LYS A 103      26.157   2.918 -83.823  1.00  0.00           H  
ATOM   1530 2HZ  LYS A 103      24.571   2.997 -84.270  1.00  0.00           H  
ATOM   1531 3HZ  LYS A 103      25.623   2.054 -85.122  1.00  0.00           H  
ATOM   1532  N   LYS A 104      24.426   5.435 -91.976  1.00  0.00           N  
ATOM   1533  CA  LYS A 104      23.917   5.094 -93.360  1.00  0.00           C  
ATOM   1534  C   LYS A 104      23.267   3.700 -93.516  1.00  0.00           C  
ATOM   1535  O   LYS A 104      23.278   2.809 -92.707  1.00  0.00           O  
ATOM   1536  CB  LYS A 104      25.057   5.210 -94.372  1.00  0.00           C  
ATOM   1537  CG  LYS A 104      25.623   6.616 -94.523  1.00  0.00           C  
ATOM   1538  CD  LYS A 104      26.783   6.642 -95.507  1.00  0.00           C  
ATOM   1539  CE  LYS A 104      27.342   8.048 -95.669  1.00  0.00           C  
ATOM   1540  NZ  LYS A 104      28.481   8.088 -96.625  1.00  0.00           N  
ATOM   1541  H   LYS A 104      25.315   5.063 -91.673  1.00  0.00           H  
ATOM   1542  HA  LYS A 104      23.133   5.804 -93.624  1.00  0.00           H  
ATOM   1543 1HB  LYS A 104      25.874   4.551 -94.077  1.00  0.00           H  
ATOM   1544 2HB  LYS A 104      24.709   4.883 -95.352  1.00  0.00           H  
ATOM   1545 1HG  LYS A 104      24.841   7.287 -94.879  1.00  0.00           H  
ATOM   1546 2HG  LYS A 104      25.972   6.974 -93.555  1.00  0.00           H  
ATOM   1547 1HD  LYS A 104      27.577   5.983 -95.152  1.00  0.00           H  
ATOM   1548 2HD  LYS A 104      26.444   6.282 -96.479  1.00  0.00           H  
ATOM   1549 1HE  LYS A 104      26.557   8.711 -96.030  1.00  0.00           H  
ATOM   1550 2HE  LYS A 104      27.683   8.418 -94.702  1.00  0.00           H  
ATOM   1551 1HZ  LYS A 104      28.823   9.035 -96.704  1.00  0.00           H  
ATOM   1552 2HZ  LYS A 104      29.224   7.490 -96.290  1.00  0.00           H  
ATOM   1553 3HZ  LYS A 104      28.173   7.765 -97.531  1.00  0.00           H  
ATOM   1554  N   LEU A 105      22.653   3.561 -94.656  1.00  0.00           N  
ATOM   1555  CA  LEU A 105      21.969   2.360 -95.276  1.00  0.00           C  
ATOM   1556  C   LEU A 105      22.033   2.357 -96.829  1.00  0.00           C  
ATOM   1557  O   LEU A 105      22.058   3.446 -97.451  1.00  0.00           O  
ATOM   1558  CB  LEU A 105      20.499   2.308 -94.840  1.00  0.00           C  
ATOM   1559  CG  LEU A 105      19.643   3.515 -95.243  1.00  0.00           C  
ATOM   1560  CD1 LEU A 105      19.120   3.318 -96.659  1.00  0.00           C  
ATOM   1561  CD2 LEU A 105      18.497   3.677 -94.255  1.00  0.00           C  
ATOM   1562  H   LEU A 105      22.671   4.434 -95.164  1.00  0.00           H  
ATOM   1563  HA  LEU A 105      22.471   1.458 -94.928  1.00  0.00           H  
ATOM   1564 1HB  LEU A 105      20.041   1.419 -95.270  1.00  0.00           H  
ATOM   1565 2HB  LEU A 105      20.462   2.222 -93.754  1.00  0.00           H  
ATOM   1566  HG  LEU A 105      20.258   4.416 -95.237  1.00  0.00           H  
ATOM   1567 1HD1 LEU A 105      18.512   4.176 -96.945  1.00  0.00           H  
ATOM   1568 2HD1 LEU A 105      19.961   3.224 -97.347  1.00  0.00           H  
ATOM   1569 3HD1 LEU A 105      18.514   2.414 -96.700  1.00  0.00           H  
ATOM   1570 1HD2 LEU A 105      17.889   4.536 -94.541  1.00  0.00           H  
ATOM   1571 2HD2 LEU A 105      17.881   2.778 -94.261  1.00  0.00           H  
ATOM   1572 3HD2 LEU A 105      18.899   3.835 -93.254  1.00  0.00           H  
ATOM   1573  N   SER A 106      21.948   1.174 -97.467  1.00  0.00           N  
ATOM   1574  CA  SER A 106      21.972   1.041 -98.923  1.00  0.00           C  
ATOM   1575  C   SER A 106      20.800   0.224 -99.484  1.00  0.00           C  
ATOM   1576  O   SER A 106      20.212  -0.595 -98.716  1.00  0.00           O  
ATOM   1577  CB  SER A 106      23.279   0.402 -99.349  1.00  0.00           C  
ATOM   1578  OG  SER A 106      24.357   1.271 -99.132  1.00  0.00           O  
ATOM   1579  H   SER A 106      21.864   0.344 -96.898  1.00  0.00           H  
ATOM   1580  HA  SER A 106      21.900   2.037 -99.363  1.00  0.00           H  
ATOM   1581 1HB  SER A 106      23.433  -0.519 -98.788  1.00  0.00           H  
ATOM   1582 2HB  SER A 106      23.228   0.138-100.404  1.00  0.00           H  
ATOM   1583  HG  SER A 106      25.040   1.005 -99.752  1.00  0.00           H  
ATOM   1584  N   LEU A 107      20.417   0.510-100.711  1.00  0.00           N  
ATOM   1585  CA  LEU A 107      19.452  -0.248-101.516  1.00  0.00           C  
ATOM   1586  C   LEU A 107      20.181  -0.901-102.699  1.00  0.00           C  
ATOM   1587  O   LEU A 107      20.973  -0.190-103.296  1.00  0.00           O  
ATOM   1588  CB  LEU A 107      18.331   0.666-102.025  1.00  0.00           C  
ATOM   1589  CG  LEU A 107      17.680   1.570-100.970  1.00  0.00           C  
ATOM   1590  CD1 LEU A 107      16.637   2.457-101.635  1.00  0.00           C  
ATOM   1591  CD2 LEU A 107      17.052   0.710 -99.882  1.00  0.00           C  
ATOM   1592  H   LEU A 107      20.846   1.335-101.105  1.00  0.00           H  
ATOM   1593  HA  LEU A 107      19.011  -1.021-100.889  1.00  0.00           H  
ATOM   1594 1HB  LEU A 107      18.734   1.308-102.807  1.00  0.00           H  
ATOM   1595 2HB  LEU A 107      17.547   0.046-102.460  1.00  0.00           H  
ATOM   1596  HG  LEU A 107      18.437   2.218-100.528  1.00  0.00           H  
ATOM   1597 1HD1 LEU A 107      16.174   3.099-100.885  1.00  0.00           H  
ATOM   1598 2HD1 LEU A 107      17.116   3.075-102.395  1.00  0.00           H  
ATOM   1599 3HD1 LEU A 107      15.873   1.835-102.101  1.00  0.00           H  
ATOM   1600 1HD2 LEU A 107      16.590   1.352 -99.132  1.00  0.00           H  
ATOM   1601 2HD2 LEU A 107      16.294   0.062-100.323  1.00  0.00           H  
ATOM   1602 3HD2 LEU A 107      17.823   0.099 -99.412  1.00  0.00           H  
ATOM   1603  N   TRP A 108      20.048  -2.220-102.953  1.00  0.00           N  
ATOM   1604  CA  TRP A 108      20.742  -2.866-104.058  1.00  0.00           C  
ATOM   1605  C   TRP A 108      20.001  -4.142-104.505  1.00  0.00           C  
ATOM   1606  O   TRP A 108      19.051  -4.522-103.767  1.00  0.00           O  
ATOM   1607  CB  TRP A 108      22.176  -3.210-103.651  1.00  0.00           C  
ATOM   1608  CG  TRP A 108      22.263  -4.307-102.633  1.00  0.00           C  
ATOM   1609  CD1 TRP A 108      22.477  -5.630-102.877  1.00  0.00           C  
ATOM   1610  CD2 TRP A 108      22.137  -4.179-101.196  1.00  0.00           C  
ATOM   1611  NE1 TRP A 108      22.492  -6.332-101.697  1.00  0.00           N  
ATOM   1612  CE2 TRP A 108      22.287  -5.460-100.658  1.00  0.00           C  
ATOM   1613  CE3 TRP A 108      21.913  -3.096-100.337  1.00  0.00           C  
ATOM   1614  CZ2 TRP A 108      22.220  -5.695 -99.294  1.00  0.00           C  
ATOM   1615  CZ3 TRP A 108      21.847  -3.332 -98.969  1.00  0.00           C  
ATOM   1616  CH2 TRP A 108      21.997  -4.598 -98.462  1.00  0.00           C  
ATOM   1617  H   TRP A 108      19.449  -2.774-102.358  1.00  0.00           H  
ATOM   1618  HA  TRP A 108      20.773  -2.174-104.899  1.00  0.00           H  
ATOM   1619 1HB  TRP A 108      22.741  -3.515-104.532  1.00  0.00           H  
ATOM   1620 2HB  TRP A 108      22.661  -2.324-103.242  1.00  0.00           H  
ATOM   1621  HD1 TRP A 108      22.616  -6.067-103.864  1.00  0.00           H  
ATOM   1622  HE1 TRP A 108      22.631  -7.329-101.607  1.00  0.00           H  
ATOM   1623  HE3 TRP A 108      21.796  -2.089-100.734  1.00  0.00           H  
ATOM   1624  HZ2 TRP A 108      22.336  -6.694 -98.872  1.00  0.00           H  
ATOM   1625  HZ3 TRP A 108      21.671  -2.484 -98.306  1.00  0.00           H  
ATOM   1626  HH2 TRP A 108      21.939  -4.748 -97.383  1.00  0.00           H  
ATOM   1627  N   ALA A 109      20.402  -4.757-105.605  1.00  0.00           N  
ATOM   1628  CA  ALA A 109      19.773  -5.937-106.192  1.00  0.00           C  
ATOM   1629  C   ALA A 109      20.890  -6.810-106.871  1.00  0.00           C  
ATOM   1630  O   ALA A 109      22.002  -6.310-107.223  1.00  0.00           O  
ATOM   1631  CB  ALA A 109      18.758  -5.455-107.172  1.00  0.00           C  
ATOM   1632  H   ALA A 109      21.213  -4.356-106.056  1.00  0.00           H  
ATOM   1633  HA  ALA A 109      19.309  -6.508-105.388  1.00  0.00           H  
ATOM   1634 1HB  ALA A 109      18.264  -6.310-107.634  1.00  0.00           H  
ATOM   1635 2HB  ALA A 109      18.018  -4.842-106.658  1.00  0.00           H  
ATOM   1636 3HB  ALA A 109      19.249  -4.862-107.942  1.00  0.00           H  
ATOM   1637  N   LYS A 110      20.681  -8.123-106.931  1.00  0.00           N  
ATOM   1638  CA  LYS A 110      21.539  -9.183-107.507  1.00  0.00           C  
ATOM   1639  C   LYS A 110      20.690 -10.279-108.111  1.00  0.00           C  
ATOM   1640  O   LYS A 110      19.660 -10.716-107.585  1.00  0.00           O  
ATOM   1641  CB  LYS A 110      22.472  -9.774-106.449  1.00  0.00           C  
ATOM   1642  CG  LYS A 110      23.460 -10.801-106.986  1.00  0.00           C  
ATOM   1643  CD  LYS A 110      24.461 -11.216-105.918  1.00  0.00           C  
ATOM   1644  CE  LYS A 110      25.426 -12.270-106.441  1.00  0.00           C  
ATOM   1645  NZ  LYS A 110      26.444 -12.646-105.424  1.00  0.00           N  
ATOM   1646  H   LYS A 110      19.799  -8.378-106.512  1.00  0.00           H  
ATOM   1647  HA  LYS A 110      22.150  -8.743-108.296  1.00  0.00           H  
ATOM   1648 1HB  LYS A 110      23.045  -8.973-105.980  1.00  0.00           H  
ATOM   1649 2HB  LYS A 110      21.881 -10.254-105.669  1.00  0.00           H  
ATOM   1650 1HG  LYS A 110      22.918 -11.684-107.326  1.00  0.00           H  
ATOM   1651 2HG  LYS A 110      24.000 -10.379-107.833  1.00  0.00           H  
ATOM   1652 1HD  LYS A 110      25.030 -10.344-105.593  1.00  0.00           H  
ATOM   1653 2HD  LYS A 110      23.928 -11.621-105.058  1.00  0.00           H  
ATOM   1654 1HE  LYS A 110      24.870 -13.161-106.728  1.00  0.00           H  
ATOM   1655 2HE  LYS A 110      25.938 -11.888-107.325  1.00  0.00           H  
ATOM   1656 1HZ  LYS A 110      27.064 -13.345-105.809  1.00  0.00           H  
ATOM   1657 2HZ  LYS A 110      26.979 -11.830-105.164  1.00  0.00           H  
ATOM   1658 3HZ  LYS A 110      25.983 -13.020-104.607  1.00  0.00           H  
ATOM   1659  N   ARG A 111      21.134 -10.777-109.347  1.00  0.00           N  
ATOM   1660  CA  ARG A 111      20.435 -11.822-110.169  1.00  0.00           C  
ATOM   1661  C   ARG A 111      20.286 -13.194-109.447  1.00  0.00           C  
ATOM   1662  O   ARG A 111      21.245 -13.737-108.970  1.00  0.00           O  
ATOM   1663  CB  ARG A 111      21.182 -12.042-111.476  1.00  0.00           C  
ATOM   1664  CG  ARG A 111      20.506 -12.997-112.446  1.00  0.00           C  
ATOM   1665  CD  ARG A 111      21.251 -13.098-113.727  1.00  0.00           C  
ATOM   1666  NE  ARG A 111      20.622 -14.031-114.648  1.00  0.00           N  
ATOM   1667  CZ  ARG A 111      21.067 -14.296-115.892  1.00  0.00           C  
ATOM   1668  NH1 ARG A 111      22.141 -13.691-116.348  1.00  0.00           N  
ATOM   1669  NH2 ARG A 111      20.423 -15.163-116.654  1.00  0.00           N  
ATOM   1670  H   ARG A 111      21.998 -10.380-109.688  1.00  0.00           H  
ATOM   1671  HA  ARG A 111      19.428 -11.469-110.393  1.00  0.00           H  
ATOM   1672 1HB  ARG A 111      21.310 -11.089-111.987  1.00  0.00           H  
ATOM   1673 2HB  ARG A 111      22.177 -12.436-111.264  1.00  0.00           H  
ATOM   1674 1HG  ARG A 111      20.453 -13.991-112.001  1.00  0.00           H  
ATOM   1675 2HG  ARG A 111      19.497 -12.643-112.662  1.00  0.00           H  
ATOM   1676 1HD  ARG A 111      21.286 -12.120-114.205  1.00  0.00           H  
ATOM   1677 2HD  ARG A 111      22.265 -13.443-113.532  1.00  0.00           H  
ATOM   1678  HE  ARG A 111      19.792 -14.516-114.333  1.00  0.00           H  
ATOM   1679 1HH1 ARG A 111      22.633 -13.028-115.766  1.00  0.00           H  
ATOM   1680 2HH1 ARG A 111      22.475 -13.889-117.280  1.00  0.00           H  
ATOM   1681 1HH2 ARG A 111      19.597 -15.628-116.303  1.00  0.00           H  
ATOM   1682 2HH2 ARG A 111      20.757 -15.361-117.585  1.00  0.00           H  
ATOM   1683  N   GLN A 112      19.114 -13.817-109.535  1.00  0.00           N  
ATOM   1684  CA  GLN A 112      18.862 -15.081-108.894  1.00  0.00           C  
ATOM   1685  C   GLN A 112      18.459 -16.080-109.940  1.00  0.00           C  
ATOM   1686  O   GLN A 112      18.813 -15.964-111.152  1.00  0.00           O  
ATOM   1687  CB  GLN A 112      17.774 -14.952-107.824  1.00  0.00           C  
ATOM   1688  CG  GLN A 112      18.172 -14.099-106.631  1.00  0.00           C  
ATOM   1689  CD  GLN A 112      19.248 -14.753-105.785  1.00  0.00           C  
ATOM   1690  OE1 GLN A 112      19.248 -15.972-105.589  1.00  0.00           O  
ATOM   1691  NE2 GLN A 112      20.173 -13.946-105.279  1.00  0.00           N  
ATOM   1692  H   GLN A 112      18.378 -13.384-110.073  1.00  0.00           H  
ATOM   1693  HA  GLN A 112      19.781 -15.411-108.409  1.00  0.00           H  
ATOM   1694 1HB  GLN A 112      16.879 -14.516-108.267  1.00  0.00           H  
ATOM   1695 2HB  GLN A 112      17.508 -15.943-107.456  1.00  0.00           H  
ATOM   1696 1HG  GLN A 112      18.553 -13.144-106.992  1.00  0.00           H  
ATOM   1697 2HG  GLN A 112      17.295 -13.939-106.005  1.00  0.00           H  
ATOM   1698 1HE2 GLN A 112      20.908 -14.320-104.712  1.00  0.00           H  
ATOM   1699 2HE2 GLN A 112      20.135 -12.964-105.463  1.00  0.00           H  
ATOM   1700  N   ASN A 113      17.747 -17.133-109.639  1.00  0.00           N  
ATOM   1701  CA  ASN A 113      17.366 -18.082-110.647  1.00  0.00           C  
ATOM   1702  C   ASN A 113      16.255 -17.523-111.588  1.00  0.00           C  
ATOM   1703  O   ASN A 113      15.981 -18.037-112.652  1.00  0.00           O  
ATOM   1704  CB  ASN A 113      16.927 -19.374-109.984  1.00  0.00           C  
ATOM   1705  CG  ASN A 113      18.081 -20.153-109.415  1.00  0.00           C  
ATOM   1706  OD1 ASN A 113      19.181 -20.157-109.980  1.00  0.00           O  
ATOM   1707  ND2 ASN A 113      17.852 -20.811-108.308  1.00  0.00           N  
ATOM   1708  H   ASN A 113      17.458 -17.287-108.683  1.00  0.00           H  
ATOM   1709  HA  ASN A 113      18.232 -18.280-111.281  1.00  0.00           H  
ATOM   1710 1HB  ASN A 113      16.224 -19.151-109.181  1.00  0.00           H  
ATOM   1711 2HB  ASN A 113      16.407 -19.998-110.711  1.00  0.00           H  
ATOM   1712 1HD2 ASN A 113      18.583 -21.347-107.884  1.00  0.00           H  
ATOM   1713 2HD2 ASN A 113      16.946 -20.779-107.886  1.00  0.00           H  
ATOM   1714  N   GLY A 114      15.700 -16.418-111.126  1.00  0.00           N  
ATOM   1715  CA  GLY A 114      14.771 -15.597-111.932  1.00  0.00           C  
ATOM   1716  C   GLY A 114      15.337 -14.417-112.633  1.00  0.00           C  
ATOM   1717  O   GLY A 114      16.445 -14.490-113.121  1.00  0.00           O  
ATOM   1718  H   GLY A 114      15.923 -16.129-110.185  1.00  0.00           H  
ATOM   1719 1HA  GLY A 114      14.307 -16.217-112.698  1.00  0.00           H  
ATOM   1720 2HA  GLY A 114      13.972 -15.221-111.294  1.00  0.00           H  
ATOM   1721  N   SER A 115      14.584 -13.287-112.759  1.00  0.00           N  
ATOM   1722  CA  SER A 115      14.958 -12.001-113.295  1.00  0.00           C  
ATOM   1723  C   SER A 115      16.009 -11.231-112.422  1.00  0.00           C  
ATOM   1724  O   SER A 115      17.146 -11.037-112.913  1.00  0.00           O  
ATOM   1725  CB  SER A 115      13.703 -11.165-113.458  1.00  0.00           C  
ATOM   1726  OG  SER A 115      14.008  -9.893-113.958  1.00  0.00           O  
ATOM   1727  H   SER A 115      13.644 -13.422-112.415  1.00  0.00           H  
ATOM   1728  HA  SER A 115      15.424 -12.154-114.270  1.00  0.00           H  
ATOM   1729 1HB  SER A 115      13.015 -11.670-114.135  1.00  0.00           H  
ATOM   1730 2HB  SER A 115      13.203 -11.070-112.495  1.00  0.00           H  
ATOM   1731  HG  SER A 115      14.962  -9.872-114.066  1.00  0.00           H  
ATOM   1732  N   VAL A 116      15.701 -10.834-111.167  1.00  0.00           N  
ATOM   1733  CA  VAL A 116      16.599 -10.223-110.200  1.00  0.00           C  
ATOM   1734  C   VAL A 116      15.970 -10.041-108.785  1.00  0.00           C  
ATOM   1735  O   VAL A 116      14.827  -9.598-108.819  1.00  0.00           O  
ATOM   1736  CB  VAL A 116      17.054  -8.852-110.735  1.00  0.00           C  
ATOM   1737  CG1 VAL A 116      15.868  -7.905-110.849  1.00  0.00           C  
ATOM   1738  CG2 VAL A 116      18.123  -8.269-109.824  1.00  0.00           C  
ATOM   1739  H   VAL A 116      14.738 -10.994-110.911  1.00  0.00           H  
ATOM   1740  HA  VAL A 116      17.469 -10.870-110.078  1.00  0.00           H  
ATOM   1741  HB  VAL A 116      17.460  -8.980-111.738  1.00  0.00           H  
ATOM   1742 1HG1 VAL A 116      16.207  -6.941-111.229  1.00  0.00           H  
ATOM   1743 2HG1 VAL A 116      15.132  -8.325-111.534  1.00  0.00           H  
ATOM   1744 3HG1 VAL A 116      15.416  -7.768-109.867  1.00  0.00           H  
ATOM   1745 1HG2 VAL A 116      18.440  -7.300-110.209  1.00  0.00           H  
ATOM   1746 2HG2 VAL A 116      17.718  -8.146-108.819  1.00  0.00           H  
ATOM   1747 3HG2 VAL A 116      18.979  -8.943-109.790  1.00  0.00           H  
ATOM   1748  N   LYS A 117      16.703 -10.314-107.687  1.00  0.00           N  
ATOM   1749  CA  LYS A 117      16.175 -10.088-106.344  1.00  0.00           C  
ATOM   1750  C   LYS A 117      16.680  -8.761-105.742  1.00  0.00           C  
ATOM   1751  O   LYS A 117      17.929  -8.713-105.570  1.00  0.00           O  
ATOM   1752  CB  LYS A 117      16.547 -11.257-105.430  1.00  0.00           C  
ATOM   1753  CG  LYS A 117      15.980 -11.158-104.020  1.00  0.00           C  
ATOM   1754  CD  LYS A 117      16.304 -12.402-103.206  1.00  0.00           C  
ATOM   1755  CE  LYS A 117      15.753 -12.297-101.791  1.00  0.00           C  
ATOM   1756  NZ  LYS A 117      16.034 -13.521-100.993  1.00  0.00           N  
ATOM   1757  H   LYS A 117      17.637 -10.684-107.792  1.00  0.00           H  
ATOM   1758  HA  LYS A 117      15.088 -10.022-106.406  1.00  0.00           H  
ATOM   1759 1HB  LYS A 117      16.192 -12.189-105.869  1.00  0.00           H  
ATOM   1760 2HB  LYS A 117      17.632 -11.325-105.350  1.00  0.00           H  
ATOM   1761 1HG  LYS A 117      16.402 -10.286-103.518  1.00  0.00           H  
ATOM   1762 2HG  LYS A 117      14.899 -11.038-104.070  1.00  0.00           H  
ATOM   1763 1HD  LYS A 117      15.871 -13.277-103.692  1.00  0.00           H  
ATOM   1764 2HD  LYS A 117      17.384 -12.533-103.156  1.00  0.00           H  
ATOM   1765 1HE  LYS A 117      16.200 -11.440-101.290  1.00  0.00           H  
ATOM   1766 2HE  LYS A 117      14.674 -12.145-101.831  1.00  0.00           H  
ATOM   1767 1HZ  LYS A 117      15.653 -13.412-100.064  1.00  0.00           H  
ATOM   1768 2HZ  LYS A 117      15.607 -14.321-101.440  1.00  0.00           H  
ATOM   1769 3HZ  LYS A 117      17.032 -13.662-100.932  1.00  0.00           H  
ATOM   1770  N   TRP A 118      15.790  -7.832-105.339  1.00  0.00           N  
ATOM   1771  CA  TRP A 118      16.054  -6.476-104.723  1.00  0.00           C  
ATOM   1772  C   TRP A 118      16.275  -6.643-103.211  1.00  0.00           C  
ATOM   1773  O   TRP A 118      15.582  -7.424-102.539  1.00  0.00           O  
ATOM   1774  CB  TRP A 118      14.892  -5.512-104.966  1.00  0.00           C  
ATOM   1775  CG  TRP A 118      15.166  -4.114-104.500  1.00  0.00           C  
ATOM   1776  CD1 TRP A 118      15.957  -3.190-105.114  1.00  0.00           C  
ATOM   1777  CD2 TRP A 118      14.647  -3.471-103.311  1.00  0.00           C  
ATOM   1778  NE1 TRP A 118      15.968  -2.022-104.393  1.00  0.00           N  
ATOM   1779  CE2 TRP A 118      15.170  -2.175-103.287  1.00  0.00           C  
ATOM   1780  CE3 TRP A 118      13.792  -3.884-102.281  1.00  0.00           C  
ATOM   1781  CZ2 TRP A 118      14.871  -1.282-102.271  1.00  0.00           C  
ATOM   1782  CZ3 TRP A 118      13.491  -2.988-101.263  1.00  0.00           C  
ATOM   1783  CH2 TRP A 118      14.016  -1.720-101.259  1.00  0.00           C  
ATOM   1784  H   TRP A 118      14.836  -8.127-105.489  1.00  0.00           H  
ATOM   1785  HA  TRP A 118      16.947  -6.054-105.184  1.00  0.00           H  
ATOM   1786 1HB  TRP A 118      14.664  -5.479-106.032  1.00  0.00           H  
ATOM   1787 2HB  TRP A 118      14.003  -5.877-104.452  1.00  0.00           H  
ATOM   1788  HD1 TRP A 118      16.502  -3.355-106.042  1.00  0.00           H  
ATOM   1789  HE1 TRP A 118      16.479  -1.186-104.635  1.00  0.00           H  
ATOM   1790  HE3 TRP A 118      13.370  -4.889-102.281  1.00  0.00           H  
ATOM   1791  HZ2 TRP A 118      15.278  -0.271-102.250  1.00  0.00           H  
ATOM   1792  HZ3 TRP A 118      12.826  -3.318-100.465  1.00  0.00           H  
ATOM   1793  HH2 TRP A 118      13.759  -1.042-100.445  1.00  0.00           H  
ATOM   1794  N   PHE A 119      17.272  -5.962-102.618  1.00  0.00           N  
ATOM   1795  CA  PHE A 119      17.681  -6.022-101.154  1.00  0.00           C  
ATOM   1796  C   PHE A 119      17.685  -4.617-100.538  1.00  0.00           C  
ATOM   1797  O   PHE A 119      17.615  -3.593-101.210  1.00  0.00           O  
ATOM   1798  CB  PHE A 119      19.068  -6.644-100.987  1.00  0.00           C  
ATOM   1799  CG  PHE A 119      19.196  -8.011-101.598  1.00  0.00           C  
ATOM   1800  CD1 PHE A 119      19.747  -8.173-102.861  1.00  0.00           C  
ATOM   1801  CD2 PHE A 119      18.767  -9.137-100.911  1.00  0.00           C  
ATOM   1802  CE1 PHE A 119      19.865  -9.430-103.423  1.00  0.00           C  
ATOM   1803  CE2 PHE A 119      18.885 -10.394-101.471  1.00  0.00           C  
ATOM   1804  CZ  PHE A 119      19.435 -10.540-102.729  1.00  0.00           C  
ATOM   1805  H   PHE A 119      17.781  -5.356-103.247  1.00  0.00           H  
ATOM   1806  HA  PHE A 119      16.961  -6.643-100.619  1.00  0.00           H  
ATOM   1807 1HB  PHE A 119      19.815  -5.996-101.444  1.00  0.00           H  
ATOM   1808 2HB  PHE A 119      19.306  -6.722 -99.927  1.00  0.00           H  
ATOM   1809  HD1 PHE A 119      20.088  -7.295-103.409  1.00  0.00           H  
ATOM   1810  HD2 PHE A 119      18.333  -9.021 -99.918  1.00  0.00           H  
ATOM   1811  HE1 PHE A 119      20.299  -9.543-104.417  1.00  0.00           H  
ATOM   1812  HE2 PHE A 119      18.544 -11.271-100.920  1.00  0.00           H  
ATOM   1813  HZ  PHE A 119      19.527 -11.531-103.172  1.00  0.00           H  
ATOM   1814  N   CYS A 120      17.678  -4.544 -99.214  1.00  0.00           N  
ATOM   1815  CA  CYS A 120      17.679  -3.288 -98.447  1.00  0.00           C  
ATOM   1816  C   CYS A 120      18.229  -3.483 -96.996  1.00  0.00           C  
ATOM   1817  O   CYS A 120      17.838  -4.378 -96.275  1.00  0.00           O  
ATOM   1818  CB  CYS A 120      16.262  -2.717 -98.381  1.00  0.00           C  
ATOM   1819  SG  CYS A 120      16.136  -1.157 -97.475  1.00  0.00           S  
ATOM   1820  H   CYS A 120      17.672  -5.424 -98.718  1.00  0.00           H  
ATOM   1821  HA  CYS A 120      18.325  -2.573 -98.956  1.00  0.00           H  
ATOM   1822 1HB  CYS A 120      15.889  -2.552 -99.392  1.00  0.00           H  
ATOM   1823 2HB  CYS A 120      15.601  -3.439 -97.903  1.00  0.00           H  
ATOM   1824  HG  CYS A 120      14.959  -0.799 -97.978  1.00  0.00           H  
ATOM   1825  N   GLY A 121      19.231  -2.634 -96.611  1.00  0.00           N  
ATOM   1826  CA  GLY A 121      19.792  -2.744 -95.275  1.00  0.00           C  
ATOM   1827  C   GLY A 121      21.141  -1.988 -95.107  1.00  0.00           C  
ATOM   1828  O   GLY A 121      21.192  -0.729 -95.322  1.00  0.00           O  
ATOM   1829  H   GLY A 121      19.590  -1.930 -97.239  1.00  0.00           H  
ATOM   1830 1HA  GLY A 121      19.082  -2.351 -94.548  1.00  0.00           H  
ATOM   1831 2HA  GLY A 121      19.951  -3.794 -95.033  1.00  0.00           H  
ATOM   1832  N   GLN A 122      22.208  -2.625 -94.637  1.00  0.00           N  
ATOM   1833  CA  GLN A 122      23.547  -1.972 -94.283  1.00  0.00           C  
ATOM   1834  C   GLN A 122      24.303  -1.378 -95.556  1.00  0.00           C  
ATOM   1835  O   GLN A 122      24.180  -1.936 -96.657  1.00  0.00           O  
ATOM   1836  CB  GLN A 122      24.455  -2.982 -93.577  1.00  0.00           C  
ATOM   1837  CG  GLN A 122      23.942  -3.441 -92.222  1.00  0.00           C  
ATOM   1838  CD  GLN A 122      24.891  -4.407 -91.540  1.00  0.00           C  
ATOM   1839  OE1 GLN A 122      26.101  -4.388 -91.785  1.00  0.00           O  
ATOM   1840  NE2 GLN A 122      24.348  -5.259 -90.678  1.00  0.00           N  
ATOM   1841  H   GLN A 122      22.098  -3.622 -94.513  1.00  0.00           H  
ATOM   1842  HA  GLN A 122      23.358  -1.138 -93.608  1.00  0.00           H  
ATOM   1843 1HB  GLN A 122      24.577  -3.864 -94.206  1.00  0.00           H  
ATOM   1844 2HB  GLN A 122      25.443  -2.545 -93.431  1.00  0.00           H  
ATOM   1845 1HG  GLN A 122      23.819  -2.570 -91.578  1.00  0.00           H  
ATOM   1846 2HG  GLN A 122      22.984  -3.942 -92.359  1.00  0.00           H  
ATOM   1847 1HE2 GLN A 122      24.925  -5.921 -90.197  1.00  0.00           H  
ATOM   1848 2HE2 GLN A 122      23.363  -5.241 -90.509  1.00  0.00           H  
ATOM   1849  N   PRO A 123      25.175  -0.315 -95.366  1.00  0.00           N  
ATOM   1850  CA  PRO A 123      26.020   0.311 -96.348  1.00  0.00           C  
ATOM   1851  C   PRO A 123      26.903  -0.612 -97.152  1.00  0.00           C  
ATOM   1852  O   PRO A 123      27.780  -1.313 -96.699  1.00  0.00           O  
ATOM   1853  CB  PRO A 123      26.864   1.246 -95.475  1.00  0.00           C  
ATOM   1854  CG  PRO A 123      25.962   1.604 -94.344  1.00  0.00           C  
ATOM   1855  CD  PRO A 123      25.207   0.335 -94.051  1.00  0.00           C  
ATOM   1856  HA  PRO A 123      25.395   0.874 -97.058  1.00  0.00           H  
ATOM   1857 1HB  PRO A 123      27.778   0.730 -95.146  1.00  0.00           H  
ATOM   1858 2HB  PRO A 123      27.183   2.121 -96.061  1.00  0.00           H  
ATOM   1859 1HG  PRO A 123      26.551   1.955 -93.484  1.00  0.00           H  
ATOM   1860 2HG  PRO A 123      25.299   2.433 -94.634  1.00  0.00           H  
ATOM   1861 1HD  PRO A 123      25.766  -0.263 -93.316  1.00  0.00           H  
ATOM   1862 2HD  PRO A 123      24.206   0.582 -93.669  1.00  0.00           H  
ATOM   1863  N   VAL A 124      26.610  -0.625 -98.429  1.00  0.00           N  
ATOM   1864  CA  VAL A 124      27.324  -1.393 -99.471  1.00  0.00           C  
ATOM   1865  C   VAL A 124      27.311  -0.523-100.719  1.00  0.00           C  
ATOM   1866  O   VAL A 124      26.499   0.391-100.819  1.00  0.00           O  
ATOM   1867  CB  VAL A 124      26.646  -2.747 -99.756  1.00  0.00           C  
ATOM   1868  CG1 VAL A 124      26.632  -3.609 -98.503  1.00  0.00           C  
ATOM   1869  CG2 VAL A 124      25.233  -2.520-100.272  1.00  0.00           C  
ATOM   1870  H   VAL A 124      25.822  -0.051 -98.693  1.00  0.00           H  
ATOM   1871  HA  VAL A 124      28.337  -1.592 -99.121  1.00  0.00           H  
ATOM   1872  HB  VAL A 124      27.227  -3.282-100.508  1.00  0.00           H  
ATOM   1873 1HG1 VAL A 124      26.150  -4.562 -98.723  1.00  0.00           H  
ATOM   1874 2HG1 VAL A 124      27.655  -3.788 -98.173  1.00  0.00           H  
ATOM   1875 3HG1 VAL A 124      26.079  -3.097 -97.716  1.00  0.00           H  
ATOM   1876 1HG2 VAL A 124      24.761  -3.481-100.472  1.00  0.00           H  
ATOM   1877 2HG2 VAL A 124      24.655  -1.980 -99.522  1.00  0.00           H  
ATOM   1878 3HG2 VAL A 124      25.271  -1.936-101.191  1.00  0.00           H  
ATOM   1879  N   THR A 125      28.163  -0.800-101.702  1.00  0.00           N  
ATOM   1880  CA  THR A 125      28.173  -0.149-102.971  1.00  0.00           C  
ATOM   1881  C   THR A 125      28.789  -0.996-104.150  1.00  0.00           C  
ATOM   1882  O   THR A 125      29.711  -1.767-103.952  1.00  0.00           O  
ATOM   1883  CB  THR A 125      28.927   1.187-102.831  1.00  0.00           C  
ATOM   1884  OG1 THR A 125      28.803   1.938-104.046  1.00  0.00           O  
ATOM   1885  CG2 THR A 125      30.399   0.941-102.540  1.00  0.00           C  
ATOM   1886  H   THR A 125      28.841  -1.525-101.515  1.00  0.00           H  
ATOM   1887  HA  THR A 125      27.142   0.043-103.270  1.00  0.00           H  
ATOM   1888  HB  THR A 125      28.493   1.766-102.017  1.00  0.00           H  
ATOM   1889  HG1 THR A 125      29.222   1.455-104.764  1.00  0.00           H  
ATOM   1890 1HG2 THR A 125      30.916   1.896-102.444  1.00  0.00           H  
ATOM   1891 2HG2 THR A 125      30.497   0.380-101.610  1.00  0.00           H  
ATOM   1892 3HG2 THR A 125      30.841   0.370-103.356  1.00  0.00           H  
ATOM   1893  N   ARG A 126      28.225  -0.808-105.425  1.00  0.00           N  
ATOM   1894  CA  ARG A 126      28.653  -1.545-106.596  1.00  0.00           C  
ATOM   1895  C   ARG A 126      29.935  -0.982-107.197  1.00  0.00           C  
ATOM   1896  O   ARG A 126      30.040   0.241-107.228  1.00  0.00           O  
ATOM   1897  CB  ARG A 126      27.518  -1.952-107.526  1.00  0.00           C  
ATOM   1898  CG  ARG A 126      27.909  -2.689-108.718  1.00  0.00           C  
ATOM   1899  CD  ARG A 126      26.756  -3.165-109.691  1.00  0.00           C  
ATOM   1900  NE  ARG A 126      25.897  -4.166-109.015  1.00  0.00           N  
ATOM   1901  CZ  ARG A 126      24.614  -3.926-108.663  1.00  0.00           C  
ATOM   1902  NH1 ARG A 126      24.015  -2.780-108.560  1.00  0.00           N  
ATOM   1903  NH2 ARG A 126      24.008  -4.943-108.175  1.00  0.00           N  
ATOM   1904  H   ARG A 126      27.487  -0.124-105.517  1.00  0.00           H  
ATOM   1905  HA  ARG A 126      28.849  -2.577-106.303  1.00  0.00           H  
ATOM   1906 1HB  ARG A 126      26.809  -2.575-106.982  1.00  0.00           H  
ATOM   1907 2HB  ARG A 126      26.984  -1.062-107.859  1.00  0.00           H  
ATOM   1908 1HG  ARG A 126      28.565  -2.069-109.331  1.00  0.00           H  
ATOM   1909 2HG  ARG A 126      28.435  -3.599-108.428  1.00  0.00           H  
ATOM   1910 1HD  ARG A 126      26.147  -2.310-109.980  1.00  0.00           H  
ATOM   1911 2HD  ARG A 126      27.195  -3.616-110.581  1.00  0.00           H  
ATOM   1912  HE  ARG A 126      26.300  -5.071-108.811  1.00  0.00           H  
ATOM   1913 1HH1 ARG A 126      24.520  -1.927-108.755  1.00  0.00           H  
ATOM   1914 2HH1 ARG A 126      23.045  -2.740-108.285  1.00  0.00           H  
ATOM   1915 1HH2 ARG A 126      24.494  -5.825-108.083  1.00  0.00           H  
ATOM   1916 2HH2 ARG A 126      23.046  -4.864-107.882  1.00  0.00           H  
ATOM   1917  N   THR A 127      30.834  -1.841-107.616  1.00  0.00           N  
ATOM   1918  CA  THR A 127      32.070  -1.445-108.329  1.00  0.00           C  
ATOM   1919  C   THR A 127      31.942  -0.876-109.772  1.00  0.00           C  
ATOM   1920  O   THR A 127      32.661   0.057-110.111  1.00  0.00           O  
ATOM   1921  CB  THR A 127      33.025  -2.652-108.378  1.00  0.00           C  
ATOM   1922  OG1 THR A 127      33.373  -3.044-107.044  1.00  0.00           O  
ATOM   1923  CG2 THR A 127      34.290  -2.301-109.146  1.00  0.00           C  
ATOM   1924  H   THR A 127      30.661  -2.820-107.437  1.00  0.00           H  
ATOM   1925  HA  THR A 127      32.542  -0.631-107.777  1.00  0.00           H  
ATOM   1926  HB  THR A 127      32.528  -3.488-108.870  1.00  0.00           H  
ATOM   1927  HG1 THR A 127      34.301  -3.288-107.015  1.00  0.00           H  
ATOM   1928 1HG2 THR A 127      34.952  -3.166-109.171  1.00  0.00           H  
ATOM   1929 2HG2 THR A 127      34.030  -2.013-110.164  1.00  0.00           H  
ATOM   1930 3HG2 THR A 127      34.796  -1.471-108.653  1.00  0.00           H  
ATOM   1931  N   THR A 128      31.140  -1.480-110.594  1.00  0.00           N  
ATOM   1932  CA  THR A 128      30.835  -1.099-111.991  1.00  0.00           C  
ATOM   1933  C   THR A 128      29.441  -1.451-112.506  1.00  0.00           C  
ATOM   1934  O   THR A 128      28.878  -2.460-112.087  1.00  0.00           O  
ATOM   1935  CB  THR A 128      31.866  -1.734-112.943  1.00  0.00           C  
ATOM   1936  OG1 THR A 128      31.668  -1.230-114.271  1.00  0.00           O  
ATOM   1937  CG2 THR A 128      31.722  -3.248-112.953  1.00  0.00           C  
ATOM   1938  H   THR A 128      30.695  -2.295-110.198  1.00  0.00           H  
ATOM   1939  HA  THR A 128      30.897  -0.014-112.076  1.00  0.00           H  
ATOM   1940  HB  THR A 128      32.872  -1.472-112.617  1.00  0.00           H  
ATOM   1941  HG1 THR A 128      32.466  -1.367-114.787  1.00  0.00           H  
ATOM   1942 1HG2 THR A 128      32.458  -3.679-113.631  1.00  0.00           H  
ATOM   1943 2HG2 THR A 128      31.883  -3.635-111.947  1.00  0.00           H  
ATOM   1944 3HG2 THR A 128      30.721  -3.515-113.288  1.00  0.00           H  
ATOM   1945  N   ALA A 129      28.898  -0.812-113.517  1.00  0.00           N  
ATOM   1946  CA  ALA A 129      27.512  -0.958-114.032  1.00  0.00           C  
ATOM   1947  C   ALA A 129      27.223  -2.287-114.673  1.00  0.00           C  
ATOM   1948  O   ALA A 129      26.048  -2.607-114.988  1.00  0.00           O  
ATOM   1949  CB  ALA A 129      27.323   0.196-115.016  1.00  0.00           C  
ATOM   1950  H   ALA A 129      29.523  -0.158-113.967  1.00  0.00           H  
ATOM   1951  HA  ALA A 129      26.827  -0.871-113.189  1.00  0.00           H  
ATOM   1952 1HB  ALA A 129      26.319   0.152-115.438  1.00  0.00           H  
ATOM   1953 2HB  ALA A 129      27.457   1.144-114.495  1.00  0.00           H  
ATOM   1954 3HB  ALA A 129      28.056   0.115-115.816  1.00  0.00           H  
ATOM   1955  N   THR A 130      28.236  -3.088-115.012  1.00  0.00           N  
ATOM   1956  CA  THR A 130      28.097  -4.375-115.647  1.00  0.00           C  
ATOM   1957  C   THR A 130      28.141  -5.469-114.562  1.00  0.00           C  
ATOM   1958  O   THR A 130      27.854  -6.696-114.817  1.00  0.00           O  
ATOM   1959  CB  THR A 130      29.199  -4.604-116.698  1.00  0.00           C  
ATOM   1960  OG1 THR A 130      30.481  -4.615-116.055  1.00  0.00           O  
ATOM   1961  CG2 THR A 130      29.173  -3.504-117.747  1.00  0.00           C  
ATOM   1962  H   THR A 130      29.160  -2.743-114.797  1.00  0.00           H  
ATOM   1963  HA  THR A 130      27.132  -4.409-116.154  1.00  0.00           H  
ATOM   1964  HB  THR A 130      29.044  -5.567-117.185  1.00  0.00           H  
ATOM   1965  HG1 THR A 130      30.421  -5.107-115.232  1.00  0.00           H  
ATOM   1966 1HG2 THR A 130      29.959  -3.682-118.481  1.00  0.00           H  
ATOM   1967 2HG2 THR A 130      28.204  -3.500-118.246  1.00  0.00           H  
ATOM   1968 3HG2 THR A 130      29.337  -2.540-117.268  1.00  0.00           H  
ATOM   1969  N   ALA A 131      28.509  -5.154-113.313  1.00  0.00           N  
ATOM   1970  CA  ALA A 131      28.620  -6.112-112.246  1.00  0.00           C  
ATOM   1971  C   ALA A 131      27.272  -6.446-111.621  1.00  0.00           C  
ATOM   1972  O   ALA A 131      26.373  -5.588-111.749  1.00  0.00           O  
ATOM   1973  CB  ALA A 131      29.575  -5.653-111.203  1.00  0.00           C  
ATOM   1974  H   ALA A 131      28.718  -4.184-113.127  1.00  0.00           H  
ATOM   1975  HA  ALA A 131      29.014  -7.039-112.663  1.00  0.00           H  
ATOM   1976 1HB  ALA A 131      29.636  -6.399-110.411  1.00  0.00           H  
ATOM   1977 2HB  ALA A 131      30.561  -5.515-111.648  1.00  0.00           H  
ATOM   1978 3HB  ALA A 131      29.231  -4.708-110.786  1.00  0.00           H  
ATOM   1979  N   THR A 132      27.048  -7.559-110.892  1.00  0.00           N  
ATOM   1980  CA  THR A 132      25.861  -8.018-110.119  1.00  0.00           C  
ATOM   1981  C   THR A 132      26.274  -7.961-108.659  1.00  0.00           C  
ATOM   1982  O   THR A 132      25.463  -7.603-107.787  1.00  0.00           O  
ATOM   1983  CB  THR A 132      25.407  -9.440-110.496  1.00  0.00           C  
ATOM   1984  OG1 THR A 132      26.475 -10.366-110.255  1.00  0.00           O  
ATOM   1985  CG2 THR A 132      25.010  -9.502-111.963  1.00  0.00           C  
ATOM   1986  H   THR A 132      27.873  -8.141-110.918  1.00  0.00           H  
ATOM   1987  HA  THR A 132      25.030  -7.345-110.330  1.00  0.00           H  
ATOM   1988  HB  THR A 132      24.552  -9.724-109.882  1.00  0.00           H  
ATOM   1989  HG1 THR A 132      26.540 -10.539-109.312  1.00  0.00           H  
ATOM   1990 1HG2 THR A 132      24.691 -10.515-112.211  1.00  0.00           H  
ATOM   1991 2HG2 THR A 132      24.190  -8.808-112.148  1.00  0.00           H  
ATOM   1992 3HG2 THR A 132      25.863  -9.229-112.583  1.00  0.00           H  
ATOM   1993  N   ASP A 133      27.584  -8.273-108.343  1.00  0.00           N  
ATOM   1994  CA  ASP A 133      28.146  -8.203-107.005  1.00  0.00           C  
ATOM   1995  C   ASP A 133      28.295  -6.757-106.481  1.00  0.00           C  
ATOM   1996  O   ASP A 133      28.511  -5.849-107.265  1.00  0.00           O  
ATOM   1997  CB  ASP A 133      29.508  -8.901-106.985  1.00  0.00           C  
ATOM   1998  CG  ASP A 133      29.400 -10.416-107.085  1.00  0.00           C  
ATOM   1999  OD1 ASP A 133      28.325 -10.930-106.881  1.00  0.00           O  
ATOM   2000  OD2 ASP A 133      30.392 -11.045-107.365  1.00  0.00           O  
ATOM   2001  H   ASP A 133      28.173  -8.566-109.109  1.00  0.00           H  
ATOM   2002  HA  ASP A 133      27.472  -8.718-106.319  1.00  0.00           H  
ATOM   2003 1HB  ASP A 133      30.114  -8.539-107.816  1.00  0.00           H  
ATOM   2004 2HB  ASP A 133      30.033  -8.649-106.063  1.00  0.00           H  
ATOM   2005  N   VAL A 134      28.104  -6.693-105.163  1.00  0.00           N  
ATOM   2006  CA  VAL A 134      28.125  -5.378-104.449  1.00  0.00           C  
ATOM   2007  C   VAL A 134      29.121  -5.364-103.281  1.00  0.00           C  
ATOM   2008  O   VAL A 134      29.192  -6.347-102.581  1.00  0.00           O  
ATOM   2009  CB  VAL A 134      26.723  -5.041-103.906  1.00  0.00           C  
ATOM   2010  CG1 VAL A 134      26.737  -3.694-103.198  1.00  0.00           C  
ATOM   2011  CG2 VAL A 134      25.714  -5.042-105.044  1.00  0.00           C  
ATOM   2012  H   VAL A 134      27.943  -7.538-104.634  1.00  0.00           H  
ATOM   2013  HA  VAL A 134      28.421  -4.604-105.158  1.00  0.00           H  
ATOM   2014  HB  VAL A 134      26.440  -5.790-103.167  1.00  0.00           H  
ATOM   2015 1HG1 VAL A 134      25.739  -3.472-102.820  1.00  0.00           H  
ATOM   2016 2HG1 VAL A 134      27.440  -3.728-102.366  1.00  0.00           H  
ATOM   2017 3HG1 VAL A 134      27.040  -2.917-103.899  1.00  0.00           H  
ATOM   2018 1HG2 VAL A 134      24.725  -4.803-104.652  1.00  0.00           H  
ATOM   2019 2HG2 VAL A 134      26.000  -4.296-105.786  1.00  0.00           H  
ATOM   2020 3HG2 VAL A 134      25.691  -6.027-105.509  1.00  0.00           H  
ATOM   2021  N   ALA A 135      29.982  -4.362-103.226  1.00  0.00           N  
ATOM   2022  CA  ALA A 135      31.022  -4.366-102.185  1.00  0.00           C  
ATOM   2023  C   ALA A 135      30.498  -3.959-100.797  1.00  0.00           C  
ATOM   2024  O   ALA A 135      29.679  -3.079-100.678  1.00  0.00           O  
ATOM   2025  CB  ALA A 135      32.067  -3.292-102.524  1.00  0.00           C  
ATOM   2026  H   ALA A 135      29.945  -3.593-103.881  1.00  0.00           H  
ATOM   2027  HA  ALA A 135      31.398  -5.385-102.087  1.00  0.00           H  
ATOM   2028 1HB  ALA A 135      32.843  -3.285-101.759  1.00  0.00           H  
ATOM   2029 2HB  ALA A 135      32.514  -3.512-103.493  1.00  0.00           H  
ATOM   2030 3HB  ALA A 135      31.586  -2.316-102.561  1.00  0.00           H  
ATOM   2031  N   ALA A 136      31.137  -4.547 -99.742  1.00  0.00           N  
ATOM   2032  CA  ALA A 136      30.716  -4.374 -98.269  1.00  0.00           C  
ATOM   2033  C   ALA A 136      31.272  -3.110 -97.670  1.00  0.00           C  
ATOM   2034  O   ALA A 136      32.066  -3.215 -96.715  1.00  0.00           O  
ATOM   2035  CB  ALA A 136      31.112  -5.625 -97.417  1.00  0.00           C  
ATOM   2036  H   ALA A 136      31.933  -5.128 -99.961  1.00  0.00           H  
ATOM   2037  HA  ALA A 136      29.628  -4.318 -98.232  1.00  0.00           H  
ATOM   2038 1HB  ALA A 136      30.802  -5.473 -96.382  1.00  0.00           H  
ATOM   2039 2HB  ALA A 136      30.617  -6.509 -97.817  1.00  0.00           H  
ATOM   2040 3HB  ALA A 136      32.191  -5.764 -97.455  1.00  0.00           H  
ATOM   2041  N   ALA A 137      30.943  -1.928 -98.251  1.00  0.00           N  
ATOM   2042  CA  ALA A 137      31.365  -0.616 -97.831  1.00  0.00           C  
ATOM   2043  C   ALA A 137      30.705  -0.143 -96.506  1.00  0.00           C  
ATOM   2044  O   ALA A 137      30.011   0.842 -96.423  1.00  0.00           O  
ATOM   2045  CB  ALA A 137      31.172   0.315 -99.035  1.00  0.00           C  
ATOM   2046  H   ALA A 137      30.340  -2.017 -99.056  1.00  0.00           H  
ATOM   2047  HA  ALA A 137      32.437  -0.650 -97.637  1.00  0.00           H  
ATOM   2048 1HB  ALA A 137      31.478   1.326 -98.766  1.00  0.00           H  
ATOM   2049 2HB  ALA A 137      31.778  -0.038 -99.869  1.00  0.00           H  
ATOM   2050 3HB  ALA A 137      30.123   0.320 -99.326  1.00  0.00           H  
ATOM   2051  N   ASN A 138      30.911  -0.905 -95.416  1.00  0.00           N  
ATOM   2052  CA  ASN A 138      30.259  -0.619 -94.121  1.00  0.00           C  
ATOM   2053  C   ASN A 138      30.681   0.759 -93.402  1.00  0.00           C  
ATOM   2054  O   ASN A 138      29.863   1.235 -92.632  1.00  0.00           O  
ATOM   2055  CB  ASN A 138      30.513  -1.796 -93.198  1.00  0.00           C  
ATOM   2056  CG  ASN A 138      29.703  -3.007 -93.569  1.00  0.00           C  
ATOM   2057  OD1 ASN A 138      28.634  -2.890 -94.180  1.00  0.00           O  
ATOM   2058  ND2 ASN A 138      30.190  -4.168 -93.213  1.00  0.00           N  
ATOM   2059  H   ASN A 138      31.532  -1.698 -95.490  1.00  0.00           H  
ATOM   2060  HA  ASN A 138      29.187  -0.505 -94.290  1.00  0.00           H  
ATOM   2061 1HB  ASN A 138      31.571  -2.059 -93.225  1.00  0.00           H  
ATOM   2062 2HB  ASN A 138      30.273  -1.513 -92.173  1.00  0.00           H  
ATOM   2063 1HD2 ASN A 138      29.694  -5.008 -93.433  1.00  0.00           H  
ATOM   2064 2HD2 ASN A 138      31.058  -4.215 -92.720  1.00  0.00           H  
ATOM   2065  N   GLY A 139      31.833   1.356 -93.626  1.00  0.00           N  
ATOM   2066  CA  GLY A 139      32.293   2.622 -92.989  1.00  0.00           C  
ATOM   2067  C   GLY A 139      32.745   2.449 -91.557  1.00  0.00           C  
ATOM   2068  O   GLY A 139      32.310   3.235 -90.678  1.00  0.00           O  
ATOM   2069  H   GLY A 139      32.436   0.892 -94.290  1.00  0.00           H  
ATOM   2070 1HA  GLY A 139      33.120   3.039 -93.564  1.00  0.00           H  
ATOM   2071 2HA  GLY A 139      31.486   3.353 -93.011  1.00  0.00           H  
ATOM   2072  N   LYS A 140      33.472   1.395 -91.267  1.00  0.00           N  
ATOM   2073  CA  LYS A 140      34.047   1.003 -89.954  1.00  0.00           C  
ATOM   2074  C   LYS A 140      33.101   1.024 -88.761  1.00  0.00           C  
ATOM   2075  O   LYS A 140      33.488   1.580 -87.773  1.00  0.00           O  
ATOM   2076  CB  LYS A 140      35.242   1.902 -89.633  1.00  0.00           C  
ATOM   2077  CG  LYS A 140      36.382   1.816 -90.639  1.00  0.00           C  
ATOM   2078  CD  LYS A 140      37.556   2.686 -90.219  1.00  0.00           C  
ATOM   2079  CE  LYS A 140      38.684   2.626 -91.240  1.00  0.00           C  
ATOM   2080  NZ  LYS A 140      39.827   3.499 -90.858  1.00  0.00           N  
ATOM   2081  H   LYS A 140      33.635   0.806 -92.071  1.00  0.00           H  
ATOM   2082  HA  LYS A 140      34.385  -0.032 -90.019  1.00  0.00           H  
ATOM   2083 1HB  LYS A 140      34.914   2.941 -89.588  1.00  0.00           H  
ATOM   2084 2HB  LYS A 140      35.640   1.642 -88.653  1.00  0.00           H  
ATOM   2085 1HG  LYS A 140      36.718   0.781 -90.721  1.00  0.00           H  
ATOM   2086 2HG  LYS A 140      36.029   2.143 -91.617  1.00  0.00           H  
ATOM   2087 1HD  LYS A 140      37.225   3.720 -90.117  1.00  0.00           H  
ATOM   2088 2HD  LYS A 140      37.934   2.347 -89.255  1.00  0.00           H  
ATOM   2089 1HE  LYS A 140      39.040   1.601 -91.328  1.00  0.00           H  
ATOM   2090 2HE  LYS A 140      38.310   2.943 -92.214  1.00  0.00           H  
ATOM   2091 1HZ  LYS A 140      40.551   3.432 -91.559  1.00  0.00           H  
ATOM   2092 2HZ  LYS A 140      39.512   4.457 -90.792  1.00  0.00           H  
ATOM   2093 3HZ  LYS A 140      40.194   3.203 -89.966  1.00  0.00           H  
ATOM   2094  N   THR A 141      31.876   0.588 -88.923  1.00  0.00           N  
ATOM   2095  CA  THR A 141      30.745   0.627 -88.026  1.00  0.00           C  
ATOM   2096  C   THR A 141      30.265   1.962 -87.545  1.00  0.00           C  
ATOM   2097  O   THR A 141      29.074   1.978 -87.092  1.00  0.00           O  
ATOM   2098  CB  THR A 141      31.053  -0.231 -86.785  1.00  0.00           C  
ATOM   2099  OG1 THR A 141      32.082   0.397 -86.009  1.00  0.00           O  
ATOM   2100  CG2 THR A 141      31.511  -1.621 -87.198  1.00  0.00           C  
ATOM   2101  H   THR A 141      31.765   0.170 -89.836  1.00  0.00           H  
ATOM   2102  HA  THR A 141      29.879   0.214 -88.543  1.00  0.00           H  
ATOM   2103  HB  THR A 141      30.156  -0.318 -86.171  1.00  0.00           H  
ATOM   2104  HG1 THR A 141      32.181   1.310 -86.290  1.00  0.00           H  
ATOM   2105 1HG2 THR A 141      31.724  -2.213 -86.308  1.00  0.00           H  
ATOM   2106 2HG2 THR A 141      30.726  -2.106 -87.778  1.00  0.00           H  
ATOM   2107 3HG2 THR A 141      32.413  -1.541 -87.804  1.00  0.00           H  
ATOM   2108  N   ASP A 142      31.040   3.034 -87.680  1.00  0.00           N  
ATOM   2109  CA  ASP A 142      30.584   4.379 -87.359  1.00  0.00           C  
ATOM   2110  C   ASP A 142      29.557   5.000 -88.343  1.00  0.00           C  
ATOM   2111  O   ASP A 142      28.672   5.720 -87.927  1.00  0.00           O  
ATOM   2112  CB  ASP A 142      31.803   5.300 -87.264  1.00  0.00           C  
ATOM   2113  CG  ASP A 142      32.665   5.018 -86.041  1.00  0.00           C  
ATOM   2114  OD1 ASP A 142      32.200   4.341 -85.154  1.00  0.00           O  
ATOM   2115  OD2 ASP A 142      33.780   5.481 -86.005  1.00  0.00           O  
ATOM   2116  H   ASP A 142      31.982   2.902 -88.020  1.00  0.00           H  
ATOM   2117  HA  ASP A 142      30.073   4.351 -86.397  1.00  0.00           H  
ATOM   2118 1HB  ASP A 142      32.417   5.185 -88.157  1.00  0.00           H  
ATOM   2119 2HB  ASP A 142      31.473   6.338 -87.225  1.00  0.00           H  
ATOM   2120  N   ASP A 143      29.575   4.714 -89.625  1.00  0.00           N  
ATOM   2121  CA  ASP A 143      28.560   5.203 -90.641  1.00  0.00           C  
ATOM   2122  C   ASP A 143      27.594   4.001 -90.929  1.00  0.00           C  
ATOM   2123  O   ASP A 143      26.956   4.049 -91.982  1.00  0.00           O  
ATOM   2124  CB  ASP A 143      29.228   5.680 -91.933  1.00  0.00           C  
ATOM   2125  CG  ASP A 143      30.078   6.928 -91.736  1.00  0.00           C  
ATOM   2126  OD1 ASP A 143      29.676   7.783 -90.983  1.00  0.00           O  
ATOM   2127  OD2 ASP A 143      31.120   7.014 -92.340  1.00  0.00           O  
ATOM   2128  H   ASP A 143      30.332   4.121 -89.933  1.00  0.00           H  
ATOM   2129  HA  ASP A 143      28.020   6.048 -90.211  1.00  0.00           H  
ATOM   2130 1HB  ASP A 143      29.861   4.886 -92.330  1.00  0.00           H  
ATOM   2131 2HB  ASP A 143      28.463   5.893 -92.681  1.00  0.00           H  
ATOM   2132  N   LYS A 144      27.373   2.965 -90.109  1.00  0.00           N  
ATOM   2133  CA  LYS A 144      26.470   1.806 -90.445  1.00  0.00           C  
ATOM   2134  C   LYS A 144      25.416   1.545 -89.432  1.00  0.00           C  
ATOM   2135  O   LYS A 144      25.705   1.122 -88.340  1.00  0.00           O  
ATOM   2136  CB  LYS A 144      27.275   0.518 -90.630  1.00  0.00           C  
ATOM   2137  CG  LYS A 144      26.426  -0.732 -90.820  1.00  0.00           C  
ATOM   2138  CD  LYS A 144      26.358  -1.554 -89.542  1.00  0.00           C  
ATOM   2139  CE  LYS A 144      27.662  -2.295 -89.289  1.00  0.00           C  
ATOM   2140  NZ  LYS A 144      27.607  -3.109 -88.044  1.00  0.00           N  
ATOM   2141  H   LYS A 144      27.848   2.977 -89.217  1.00  0.00           H  
ATOM   2142  HA  LYS A 144      25.956   2.027 -91.381  1.00  0.00           H  
ATOM   2143 1HB  LYS A 144      27.925   0.617 -91.500  1.00  0.00           H  
ATOM   2144 2HB  LYS A 144      27.913   0.360 -89.760  1.00  0.00           H  
ATOM   2145 1HG  LYS A 144      25.415  -0.445 -91.112  1.00  0.00           H  
ATOM   2146 2HG  LYS A 144      26.854  -1.344 -91.613  1.00  0.00           H  
ATOM   2147 1HD  LYS A 144      26.153  -0.895 -88.696  1.00  0.00           H  
ATOM   2148 2HD  LYS A 144      25.548  -2.279 -89.618  1.00  0.00           H  
ATOM   2149 1HE  LYS A 144      27.876  -2.952 -90.130  1.00  0.00           H  
ATOM   2150 2HE  LYS A 144      28.478  -1.576 -89.201  1.00  0.00           H  
ATOM   2151 1HZ  LYS A 144      28.490  -3.583 -87.913  1.00  0.00           H  
ATOM   2152 2HZ  LYS A 144      27.428  -2.506 -87.254  1.00  0.00           H  
ATOM   2153 3HZ  LYS A 144      26.867  -3.792 -88.121  1.00  0.00           H  
ATOM   2154  N   ILE A 145      24.144   1.654 -89.876  1.00  0.00           N  
ATOM   2155  CA  ILE A 145      22.966   1.405 -88.984  1.00  0.00           C  
ATOM   2156  C   ILE A 145      22.986  -0.034 -88.865  1.00  0.00           C  
ATOM   2157  O   ILE A 145      22.942  -0.720 -89.901  1.00  0.00           O  
ATOM   2158  CB  ILE A 145      21.613   1.876 -89.549  1.00  0.00           C  
ATOM   2159  CG1 ILE A 145      21.608   3.398 -89.721  1.00  0.00           C  
ATOM   2160  CG2 ILE A 145      20.475   1.437 -88.640  1.00  0.00           C  
ATOM   2161  CD1 ILE A 145      20.407   3.922 -90.475  1.00  0.00           C  
ATOM   2162  H   ILE A 145      23.986   1.912 -90.840  1.00  0.00           H  
ATOM   2163  HA  ILE A 145      23.117   1.948 -88.052  1.00  0.00           H  
ATOM   2164  HB  ILE A 145      21.462   1.447 -90.538  1.00  0.00           H  
ATOM   2165 1HG1 ILE A 145      21.631   3.875 -88.742  1.00  0.00           H  
ATOM   2166 2HG1 ILE A 145      22.506   3.706 -90.256  1.00  0.00           H  
ATOM   2167 1HG2 ILE A 145      19.527   1.779 -89.054  1.00  0.00           H  
ATOM   2168 2HG2 ILE A 145      20.468   0.350 -88.567  1.00  0.00           H  
ATOM   2169 3HG2 ILE A 145      20.614   1.866 -87.648  1.00  0.00           H  
ATOM   2170 1HD1 ILE A 145      20.475   5.008 -90.557  1.00  0.00           H  
ATOM   2171 2HD1 ILE A 145      20.384   3.484 -91.473  1.00  0.00           H  
ATOM   2172 3HD1 ILE A 145      19.497   3.656 -89.940  1.00  0.00           H  
ATOM   2173  N   ASN A 146      22.998  -0.532 -87.627  1.00  0.00           N  
ATOM   2174  CA  ASN A 146      22.883  -1.936 -87.283  1.00  0.00           C  
ATOM   2175  C   ASN A 146      21.519  -2.637 -87.580  1.00  0.00           C  
ATOM   2176  O   ASN A 146      20.452  -2.242 -87.106  1.00  0.00           O  
ATOM   2177  CB  ASN A 146      23.230  -2.089 -85.814  1.00  0.00           C  
ATOM   2178  CG  ASN A 146      23.236  -3.525 -85.367  1.00  0.00           C  
ATOM   2179  OD1 ASN A 146      22.213  -4.215 -85.442  1.00  0.00           O  
ATOM   2180  ND2 ASN A 146      24.369  -3.988 -84.904  1.00  0.00           N  
ATOM   2181  H   ASN A 146      23.098   0.149 -86.888  1.00  0.00           H  
ATOM   2182  HA  ASN A 146      23.591  -2.501 -87.892  1.00  0.00           H  
ATOM   2183 1HB  ASN A 146      24.215  -1.658 -85.625  1.00  0.00           H  
ATOM   2184 2HB  ASN A 146      22.510  -1.536 -85.210  1.00  0.00           H  
ATOM   2185 1HD2 ASN A 146      24.432  -4.936 -84.593  1.00  0.00           H  
ATOM   2186 2HD2 ASN A 146      25.172  -3.394 -84.862  1.00  0.00           H  
ATOM   2187  N   THR A 147      21.591  -3.754 -88.272  1.00  0.00           N  
ATOM   2188  CA  THR A 147      20.337  -4.571 -88.635  1.00  0.00           C  
ATOM   2189  C   THR A 147      19.136  -4.708 -87.655  1.00  0.00           C  
ATOM   2190  O   THR A 147      17.968  -4.634 -88.101  1.00  0.00           O  
ATOM   2191  CB  THR A 147      20.761  -6.009 -88.985  1.00  0.00           C  
ATOM   2192  OG1 THR A 147      21.611  -5.991 -90.140  1.00  0.00           O  
ATOM   2193  CG2 THR A 147      19.541  -6.871 -89.273  1.00  0.00           C  
ATOM   2194  H   THR A 147      22.497  -4.083 -88.572  1.00  0.00           H  
ATOM   2195  HA  THR A 147      19.864  -4.112 -89.503  1.00  0.00           H  
ATOM   2196  HB  THR A 147      21.314  -6.439 -88.150  1.00  0.00           H  
ATOM   2197  HG1 THR A 147      21.260  -6.588 -90.805  1.00  0.00           H  
ATOM   2198 1HG2 THR A 147      19.860  -7.883 -89.518  1.00  0.00           H  
ATOM   2199 2HG2 THR A 147      18.898  -6.896 -88.393  1.00  0.00           H  
ATOM   2200 3HG2 THR A 147      18.989  -6.451 -90.113  1.00  0.00           H  
ATOM   2201  N   LYS A 148      19.347  -4.815 -86.305  1.00  0.00           N  
ATOM   2202  CA  LYS A 148      18.278  -4.802 -85.348  1.00  0.00           C  
ATOM   2203  C   LYS A 148      17.403  -3.503 -85.392  1.00  0.00           C  
ATOM   2204  O   LYS A 148      16.232  -3.596 -85.190  1.00  0.00           O  
ATOM   2205  CB  LYS A 148      18.868  -5.002 -83.951  1.00  0.00           C  
ATOM   2206  CG  LYS A 148      17.833  -5.090 -82.837  1.00  0.00           C  
ATOM   2207  CD  LYS A 148      18.496  -5.116 -81.468  1.00  0.00           C  
ATOM   2208  CE  LYS A 148      18.979  -3.732 -81.060  1.00  0.00           C  
ATOM   2209  NZ  LYS A 148      19.372  -3.680 -79.625  1.00  0.00           N  
ATOM   2210  H   LYS A 148      20.299  -4.908 -85.978  1.00  0.00           H  
ATOM   2211  HA  LYS A 148      17.598  -5.623 -85.577  1.00  0.00           H  
ATOM   2212 1HB  LYS A 148      19.458  -5.918 -83.933  1.00  0.00           H  
ATOM   2213 2HB  LYS A 148      19.540  -4.175 -83.718  1.00  0.00           H  
ATOM   2214 1HG  LYS A 148      17.165  -4.229 -82.892  1.00  0.00           H  
ATOM   2215 2HG  LYS A 148      17.241  -5.996 -82.962  1.00  0.00           H  
ATOM   2216 1HD  LYS A 148      17.782  -5.476 -80.725  1.00  0.00           H  
ATOM   2217 2HD  LYS A 148      19.347  -5.796 -81.489  1.00  0.00           H  
ATOM   2218 1HE  LYS A 148      19.838  -3.453 -81.669  1.00  0.00           H  
ATOM   2219 2HE  LYS A 148      18.187  -3.004 -81.233  1.00  0.00           H  
ATOM   2220 1HZ  LYS A 148      19.685  -2.748 -79.395  1.00  0.00           H  
ATOM   2221 2HZ  LYS A 148      18.577  -3.920 -79.049  1.00  0.00           H  
ATOM   2222 3HZ  LYS A 148      20.119  -4.338 -79.457  1.00  0.00           H  
ATOM   2223  N   HIS A 149      17.976  -2.373 -85.742  1.00  0.00           N  
ATOM   2224  CA  HIS A 149      17.192  -1.141 -85.747  1.00  0.00           C  
ATOM   2225  C   HIS A 149      16.651  -0.848 -87.125  1.00  0.00           C  
ATOM   2226  O   HIS A 149      16.206   0.267 -87.457  1.00  0.00           O  
ATOM   2227  CB  HIS A 149      18.033   0.046 -85.265  1.00  0.00           C  
ATOM   2228  CG  HIS A 149      18.550  -0.110 -83.869  1.00  0.00           C  
ATOM   2229  ND1 HIS A 149      17.739  -0.004 -82.759  1.00  0.00           N  
ATOM   2230  CD2 HIS A 149      19.796  -0.364 -83.403  1.00  0.00           C  
ATOM   2231  CE1 HIS A 149      18.464  -0.187 -81.669  1.00  0.00           C  
ATOM   2232  NE2 HIS A 149      19.714  -0.407 -82.033  1.00  0.00           N  
ATOM   2233  H   HIS A 149      18.950  -2.338 -86.010  1.00  0.00           H  
ATOM   2234  HA  HIS A 149      16.344  -1.247 -85.071  1.00  0.00           H  
ATOM   2235 1HB  HIS A 149      18.885   0.183 -85.932  1.00  0.00           H  
ATOM   2236 2HB  HIS A 149      17.435   0.956 -85.307  1.00  0.00           H  
ATOM   2237  HD1 HIS A 149      16.745   0.107 -82.761  1.00  0.00           H  
ATOM   2238  HD2 HIS A 149      20.754  -0.523 -83.898  1.00  0.00           H  
ATOM   2239  HE1 HIS A 149      18.004  -0.143 -80.682  1.00  0.00           H  
ATOM   2240  N   LEU A 150      16.678  -1.729 -88.171  1.00  0.00           N  
ATOM   2241  CA  LEU A 150      16.117  -1.547 -89.518  1.00  0.00           C  
ATOM   2242  C   LEU A 150      14.714  -2.212 -89.578  1.00  0.00           C  
ATOM   2243  O   LEU A 150      14.540  -3.174 -88.835  1.00  0.00           O  
ATOM   2244  CB  LEU A 150      17.045  -2.157 -90.576  1.00  0.00           C  
ATOM   2245  CG  LEU A 150      18.471  -1.592 -90.614  1.00  0.00           C  
ATOM   2246  CD1 LEU A 150      19.302  -2.378 -91.619  1.00  0.00           C  
ATOM   2247  CD2 LEU A 150      18.424  -0.116 -90.979  1.00  0.00           C  
ATOM   2248  H   LEU A 150      17.149  -2.593 -87.948  1.00  0.00           H  
ATOM   2249  HA  LEU A 150      16.023  -0.479 -89.712  1.00  0.00           H  
ATOM   2250 1HB  LEU A 150      17.118  -3.229 -90.397  1.00  0.00           H  
ATOM   2251 2HB  LEU A 150      16.601  -2.003 -91.559  1.00  0.00           H  
ATOM   2252  HG  LEU A 150      18.936  -1.709 -89.634  1.00  0.00           H  
ATOM   2253 1HD1 LEU A 150      20.315  -1.977 -91.647  1.00  0.00           H  
ATOM   2254 2HD1 LEU A 150      19.336  -3.427 -91.323  1.00  0.00           H  
ATOM   2255 3HD1 LEU A 150      18.852  -2.294 -92.608  1.00  0.00           H  
ATOM   2256 1HD2 LEU A 150      19.437   0.285 -91.006  1.00  0.00           H  
ATOM   2257 2HD2 LEU A 150      17.961   0.001 -91.959  1.00  0.00           H  
ATOM   2258 3HD2 LEU A 150      17.839   0.424 -90.235  1.00  0.00           H  
ATOM   2259  N   PRO A 151      13.793  -1.763 -90.506  1.00  0.00           N  
ATOM   2260  CA  PRO A 151      12.480  -2.348 -90.634  1.00  0.00           C  
ATOM   2261  C   PRO A 151      12.525  -3.854 -90.856  1.00  0.00           C  
ATOM   2262  O   PRO A 151      13.388  -4.353 -91.603  1.00  0.00           O  
ATOM   2263  CB  PRO A 151      11.912  -1.616 -91.854  1.00  0.00           C  
ATOM   2264  CG  PRO A 151      12.580  -0.283 -91.824  1.00  0.00           C  
ATOM   2265  CD  PRO A 151      13.979  -0.575 -91.351  1.00  0.00           C  
ATOM   2266  HA  PRO A 151      11.896  -2.126 -89.728  1.00  0.00           H  
ATOM   2267 1HB  PRO A 151      12.133  -2.183 -92.770  1.00  0.00           H  
ATOM   2268 2HB  PRO A 151      10.817  -1.547 -91.775  1.00  0.00           H  
ATOM   2269 1HG  PRO A 151      12.558   0.175 -92.824  1.00  0.00           H  
ATOM   2270 2HG  PRO A 151      12.039   0.398 -91.150  1.00  0.00           H  
ATOM   2271 1HD  PRO A 151      14.622  -0.792 -92.217  1.00  0.00           H  
ATOM   2272 2HD  PRO A 151      14.364   0.287 -90.788  1.00  0.00           H  
ATOM   2273  N   SER A 152      11.502  -4.590 -90.353  1.00  0.00           N  
ATOM   2274  CA  SER A 152      11.610  -6.042 -90.371  1.00  0.00           C  
ATOM   2275  C   SER A 152      11.843  -6.596 -91.772  1.00  0.00           C  
ATOM   2276  O   SER A 152      12.472  -7.584 -91.805  1.00  0.00           O  
ATOM   2277  CB  SER A 152      10.352  -6.654 -89.786  1.00  0.00           C  
ATOM   2278  OG  SER A 152       9.226  -6.314 -90.549  1.00  0.00           O  
ATOM   2279  H   SER A 152      10.672  -4.162 -89.968  1.00  0.00           H  
ATOM   2280  HA  SER A 152      12.464  -6.333 -89.759  1.00  0.00           H  
ATOM   2281 1HB  SER A 152      10.457  -7.738 -89.751  1.00  0.00           H  
ATOM   2282 2HB  SER A 152      10.219  -6.305 -88.763  1.00  0.00           H  
ATOM   2283  HG  SER A 152       8.957  -5.442 -90.249  1.00  0.00           H  
ATOM   2284  N   THR A 153      11.349  -5.925 -92.836  1.00  0.00           N  
ATOM   2285  CA  THR A 153      11.574  -6.239 -94.251  1.00  0.00           C  
ATOM   2286  C   THR A 153      12.978  -5.858 -94.766  1.00  0.00           C  
ATOM   2287  O   THR A 153      13.773  -6.607 -95.299  1.00  0.00           O  
ATOM   2288  CB  THR A 153      10.512  -5.542 -95.122  1.00  0.00           C  
ATOM   2289  OG1 THR A 153       9.208  -6.016 -94.761  1.00  0.00           O  
ATOM   2290  CG2 THR A 153      10.761  -5.826 -96.595  1.00  0.00           C  
ATOM   2291  H   THR A 153      10.771  -5.134 -92.593  1.00  0.00           H  
ATOM   2292  HA  THR A 153      11.487  -7.317 -94.384  1.00  0.00           H  
ATOM   2293  HB  THR A 153      10.552  -4.466 -94.953  1.00  0.00           H  
ATOM   2294  HG1 THR A 153       9.244  -6.416 -93.888  1.00  0.00           H  
ATOM   2295 1HG2 THR A 153      10.002  -5.325 -97.195  1.00  0.00           H  
ATOM   2296 2HG2 THR A 153      11.747  -5.456 -96.875  1.00  0.00           H  
ATOM   2297 3HG2 THR A 153      10.713  -6.900 -96.772  1.00  0.00           H  
ATOM   2298  N   CYS A 154      13.328  -4.557 -94.495  1.00  0.00           N  
ATOM   2299  CA  CYS A 154      14.514  -3.840 -94.908  1.00  0.00           C  
ATOM   2300  C   CYS A 154      15.694  -4.215 -93.962  1.00  0.00           C  
ATOM   2301  O   CYS A 154      16.194  -3.393 -93.241  1.00  0.00           O  
ATOM   2302  CB  CYS A 154      14.265  -2.332 -94.880  1.00  0.00           C  
ATOM   2303  SG  CYS A 154      12.994  -1.771 -96.038  1.00  0.00           S  
ATOM   2304  H   CYS A 154      12.638  -4.082 -93.931  1.00  0.00           H  
ATOM   2305  HA  CYS A 154      14.757  -4.134 -95.929  1.00  0.00           H  
ATOM   2306 1HB  CYS A 154      13.964  -2.031 -93.877  1.00  0.00           H  
ATOM   2307 2HB  CYS A 154      15.191  -1.806 -95.116  1.00  0.00           H  
ATOM   2308  HG  CYS A 154      11.998  -2.468 -95.499  1.00  0.00           H  
ATOM   2309  N   ARG A 155      16.140  -5.482 -93.836  1.00  0.00           N  
ATOM   2310  CA  ARG A 155      17.276  -6.075 -93.064  1.00  0.00           C  
ATOM   2311  C   ARG A 155      18.313  -6.944 -93.675  1.00  0.00           C  
ATOM   2312  O   ARG A 155      18.646  -8.027 -93.252  1.00  0.00           O  
ATOM   2313  CB  ARG A 155      16.706  -6.899 -91.919  1.00  0.00           C  
ATOM   2314  CG  ARG A 155      16.115  -6.086 -90.778  1.00  0.00           C  
ATOM   2315  CD  ARG A 155      15.730  -6.948 -89.631  1.00  0.00           C  
ATOM   2316  NE  ARG A 155      14.579  -7.781 -89.941  1.00  0.00           N  
ATOM   2317  CZ  ARG A 155      14.171  -8.829 -89.199  1.00  0.00           C  
ATOM   2318  NH1 ARG A 155      14.828  -9.158 -88.109  1.00  0.00           N  
ATOM   2319  NH2 ARG A 155      13.110  -9.525 -89.567  1.00  0.00           N  
ATOM   2320  H   ARG A 155      15.553  -6.088 -94.391  1.00  0.00           H  
ATOM   2321  HA  ARG A 155      17.883  -5.263 -92.662  1.00  0.00           H  
ATOM   2322 1HB  ARG A 155      15.922  -7.554 -92.297  1.00  0.00           H  
ATOM   2323 2HB  ARG A 155      17.488  -7.533 -91.501  1.00  0.00           H  
ATOM   2324 1HG  ARG A 155      16.851  -5.360 -90.429  1.00  0.00           H  
ATOM   2325 2HG  ARG A 155      15.225  -5.562 -91.127  1.00  0.00           H  
ATOM   2326 1HD  ARG A 155      16.563  -7.600 -89.370  1.00  0.00           H  
ATOM   2327 2HD  ARG A 155      15.477  -6.323 -88.775  1.00  0.00           H  
ATOM   2328  HE  ARG A 155      14.049  -7.559 -90.773  1.00  0.00           H  
ATOM   2329 1HH1 ARG A 155      15.639  -8.625 -87.828  1.00  0.00           H  
ATOM   2330 2HH1 ARG A 155      14.522  -9.943 -87.553  1.00  0.00           H  
ATOM   2331 1HH2 ARG A 155      12.605  -9.272 -90.405  1.00  0.00           H  
ATOM   2332 2HH2 ARG A 155      12.804 -10.310 -89.011  1.00  0.00           H  
ATOM   2333  N   ASP A 156      18.967  -6.479 -94.766  1.00  0.00           N  
ATOM   2334  CA  ASP A 156      20.038  -7.106 -95.490  1.00  0.00           C  
ATOM   2335  C   ASP A 156      21.468  -6.517 -95.234  1.00  0.00           C  
ATOM   2336  O   ASP A 156      21.627  -5.404 -94.728  1.00  0.00           O  
ATOM   2337  CB  ASP A 156      19.711  -7.033 -96.984  1.00  0.00           C  
ATOM   2338  CG  ASP A 156      18.454  -7.809 -97.354  1.00  0.00           C  
ATOM   2339  OD1 ASP A 156      18.329  -8.935 -96.933  1.00  0.00           O  
ATOM   2340  OD2 ASP A 156      17.632  -7.269 -98.054  1.00  0.00           O  
ATOM   2341  H   ASP A 156      18.627  -5.578 -95.073  1.00  0.00           H  
ATOM   2342  HA  ASP A 156      20.102  -8.149 -95.178  1.00  0.00           H  
ATOM   2343 1HB  ASP A 156      19.577  -5.992 -97.276  1.00  0.00           H  
ATOM   2344 2HB  ASP A 156      20.548  -7.430 -97.559  1.00  0.00           H  
ATOM   2345  N   ASP A 157      22.455  -7.280 -95.618  1.00  0.00           N  
ATOM   2346  CA  ASP A 157      23.822  -6.951 -95.546  1.00  0.00           C  
ATOM   2347  C   ASP A 157      24.641  -7.576 -96.677  1.00  0.00           C  
ATOM   2348  O   ASP A 157      24.053  -8.174 -97.596  1.00  0.00           O  
ATOM   2349  CB  ASP A 157      24.374  -7.389 -94.188  1.00  0.00           C  
ATOM   2350  CG  ASP A 157      24.347  -8.900 -93.996  1.00  0.00           C  
ATOM   2351  OD1 ASP A 157      24.490  -9.604 -94.967  1.00  0.00           O  
ATOM   2352  OD2 ASP A 157      24.182  -9.334 -92.881  1.00  0.00           O  
ATOM   2353  H   ASP A 157      22.183  -8.177 -95.994  1.00  0.00           H  
ATOM   2354  HA  ASP A 157      23.923  -5.869 -95.644  1.00  0.00           H  
ATOM   2355 1HB  ASP A 157      25.403  -7.043 -94.084  1.00  0.00           H  
ATOM   2356 2HB  ASP A 157      23.791  -6.926 -93.391  1.00  0.00           H  
ATOM   2357  N   SER A 158      25.984  -7.597 -96.679  1.00  0.00           N  
ATOM   2358  CA  SER A 158      26.826  -8.147 -97.764  1.00  0.00           C  
ATOM   2359  C   SER A 158      26.687  -9.657 -98.089  1.00  0.00           C  
ATOM   2360  O   SER A 158      26.978 -10.078 -99.190  1.00  0.00           O  
ATOM   2361  CB  SER A 158      28.277  -7.864 -97.426  1.00  0.00           C  
ATOM   2362  OG  SER A 158      28.684  -8.599 -96.305  1.00  0.00           O  
ATOM   2363  H   SER A 158      26.429  -7.199 -95.864  1.00  0.00           H  
ATOM   2364  HA  SER A 158      26.561  -7.647 -98.696  1.00  0.00           H  
ATOM   2365 1HB  SER A 158      28.905  -8.119 -98.279  1.00  0.00           H  
ATOM   2366 2HB  SER A 158      28.404  -6.800 -97.232  1.00  0.00           H  
ATOM   2367  HG  SER A 158      28.587  -9.524 -96.545  1.00  0.00           H  
ATOM   2368  N   SER A 159      26.100 -10.477 -97.121  1.00  0.00           N  
ATOM   2369  CA  SER A 159      25.803 -11.929 -97.282  1.00  0.00           C  
ATOM   2370  C   SER A 159      24.471 -12.351 -97.909  1.00  0.00           C  
ATOM   2371  O   SER A 159      24.215 -13.558 -98.216  1.00  0.00           O  
ATOM   2372  CB  SER A 159      25.891 -12.586 -95.918  1.00  0.00           C  
ATOM   2373  OG  SER A 159      24.816 -12.204 -95.106  1.00  0.00           O  
ATOM   2374  H   SER A 159      25.868 -10.021 -96.251  1.00  0.00           H  
ATOM   2375  HA  SER A 159      26.550 -12.364 -97.948  1.00  0.00           H  
ATOM   2376 1HB  SER A 159      25.894 -13.670 -96.036  1.00  0.00           H  
ATOM   2377 2HB  SER A 159      26.829 -12.307 -95.440  1.00  0.00           H  
ATOM   2378  HG  SER A 159      24.821 -11.243 -95.094  1.00  0.00           H  
ATOM   2379  N   ALA A 160      23.622 -11.356 -98.061  1.00  0.00           N  
ATOM   2380  CA  ALA A 160      22.255 -11.356 -98.589  1.00  0.00           C  
ATOM   2381  C   ALA A 160      22.218 -11.912-100.054  1.00  0.00           C  
ATOM   2382  O   ALA A 160      23.091 -11.574-100.881  1.00  0.00           O  
ATOM   2383  CB  ALA A 160      21.547 -10.007 -98.459  1.00  0.00           C  
ATOM   2384  H   ALA A 160      24.029 -10.486 -97.749  1.00  0.00           H  
ATOM   2385  HA  ALA A 160      21.652 -12.018 -97.968  1.00  0.00           H  
ATOM   2386 1HB  ALA A 160      20.540 -10.083 -98.871  1.00  0.00           H  
ATOM   2387 2HB  ALA A 160      21.488  -9.727 -97.407  1.00  0.00           H  
ATOM   2388 3HB  ALA A 160      22.105  -9.249 -99.005  1.00  0.00           H  
ATOM   2389  N   SER A 161      21.265 -12.814-100.295  1.00  0.00           N  
ATOM   2390  CA  SER A 161      20.926 -13.552-101.565  1.00  0.00           C  
ATOM   2391  C   SER A 161      19.467 -14.061-101.640  1.00  0.00           C  
ATOM   2392  O   SER A 161      18.746 -14.079-100.604  1.00  0.00           O  
ATOM   2393  OXT SER A 161      19.017 -14.440-102.686  1.00  0.00           O  
ATOM   2394  CB  SER A 161      21.860 -14.735-101.730  1.00  0.00           C  
ATOM   2395  OG  SER A 161      21.580 -15.435-102.912  1.00  0.00           O  
ATOM   2396  H   SER A 161      20.718 -12.988 -99.464  1.00  0.00           H  
ATOM   2397  HA  SER A 161      21.060 -12.872-102.407  1.00  0.00           H  
ATOM   2398 1HB  SER A 161      22.892 -14.384-101.748  1.00  0.00           H  
ATOM   2399 2HB  SER A 161      21.757 -15.403-100.876  1.00  0.00           H  
ATOM   2400  HG  SER A 161      21.351 -16.328-102.643  1.00  0.00           H  
TER    2401      SER A 161 
ATOM   2402  N   PHE B   1       9.505   3.055 -35.798  1.00  0.00           N  
ATOM   2403  CA  PHE B   1       8.699   1.862 -36.124  1.00  0.00           C  
ATOM   2404  C   PHE B   1       8.696   1.433 -37.654  1.00  0.00           C  
ATOM   2405  O   PHE B   1       7.924   2.006 -38.475  1.00  0.00           O  
ATOM   2406  CB  PHE B   1       7.260   2.110 -35.666  1.00  0.00           C  
ATOM   2407  CG  PHE B   1       7.118   2.276 -34.180  1.00  0.00           C  
ATOM   2408  CD1 PHE B   1       7.074   3.540 -33.610  1.00  0.00           C  
ATOM   2409  CD2 PHE B   1       7.029   1.170 -33.348  1.00  0.00           C  
ATOM   2410  CE1 PHE B   1       6.943   3.694 -32.243  1.00  0.00           C  
ATOM   2411  CE2 PHE B   1       6.897   1.321 -31.982  1.00  0.00           C  
ATOM   2412  CZ  PHE B   1       6.855   2.585 -31.429  1.00  0.00           C  
ATOM   2413 1H   PHE B   1       9.443   3.242 -34.818  1.00  0.00           H  
ATOM   2414 2H   PHE B   1      10.460   2.890 -36.046  1.00  0.00           H  
ATOM   2415 3H   PHE B   1       9.159   3.841 -36.310  1.00  0.00           H  
ATOM   2416  HA  PHE B   1       9.112   1.007 -35.587  1.00  0.00           H  
ATOM   2417 1HB  PHE B   1       6.875   3.007 -36.147  1.00  0.00           H  
ATOM   2418 2HB  PHE B   1       6.631   1.276 -35.976  1.00  0.00           H  
ATOM   2419  HD1 PHE B   1       7.142   4.417 -34.254  1.00  0.00           H  
ATOM   2420  HD2 PHE B   1       7.064   0.171 -33.785  1.00  0.00           H  
ATOM   2421  HE1 PHE B   1       6.910   4.693 -31.808  1.00  0.00           H  
ATOM   2422  HE2 PHE B   1       6.828   0.443 -31.339  1.00  0.00           H  
ATOM   2423  HZ  PHE B   1       6.753   2.706 -30.351  1.00  0.00           H  
ATOM   2424  N   THR B   2       9.465   0.403 -38.107  1.00  0.00           N  
ATOM   2425  CA  THR B   2       9.596   0.096 -39.544  1.00  0.00           C  
ATOM   2426  C   THR B   2       8.245  -0.294 -40.205  1.00  0.00           C  
ATOM   2427  O   THR B   2       8.028   0.152 -41.350  1.00  0.00           O  
ATOM   2428  CB  THR B   2      10.617  -1.036 -39.761  1.00  0.00           C  
ATOM   2429  OG1 THR B   2      11.885  -0.650 -39.215  1.00  0.00           O  
ATOM   2430  CG2 THR B   2      10.776  -1.334 -41.244  1.00  0.00           C  
ATOM   2431  H   THR B   2       9.958  -0.167 -37.435  1.00  0.00           H  
ATOM   2432  HA  THR B   2       9.952   0.990 -40.057  1.00  0.00           H  
ATOM   2433  HB  THR B   2      10.276  -1.936 -39.249  1.00  0.00           H  
ATOM   2434  HG1 THR B   2      12.214   0.120 -39.686  1.00  0.00           H  
ATOM   2435 1HG2 THR B   2      11.501  -2.137 -41.378  1.00  0.00           H  
ATOM   2436 2HG2 THR B   2       9.815  -1.639 -41.659  1.00  0.00           H  
ATOM   2437 3HG2 THR B   2      11.126  -0.440 -41.758  1.00  0.00           H  
ATOM   2438  N   LEU B   3       7.341  -0.935 -39.420  1.00  0.00           N  
ATOM   2439  CA  LEU B   3       5.918  -1.200 -39.930  1.00  0.00           C  
ATOM   2440  C   LEU B   3       5.230   0.047 -40.573  1.00  0.00           C  
ATOM   2441  O   LEU B   3       4.451  -0.129 -41.518  1.00  0.00           O  
ATOM   2442  CB  LEU B   3       5.034  -1.702 -38.782  1.00  0.00           C  
ATOM   2443  CG  LEU B   3       3.626  -2.165 -39.180  1.00  0.00           C  
ATOM   2444  CD1 LEU B   3       3.731  -3.319 -40.168  1.00  0.00           C  
ATOM   2445  CD2 LEU B   3       2.857  -2.580 -37.934  1.00  0.00           C  
ATOM   2446  H   LEU B   3       7.597  -1.244 -38.493  1.00  0.00           H  
ATOM   2447  HA  LEU B   3       5.964  -1.968 -40.701  1.00  0.00           H  
ATOM   2448 1HB  LEU B   3       5.534  -2.541 -38.300  1.00  0.00           H  
ATOM   2449 2HB  LEU B   3       4.925  -0.902 -38.051  1.00  0.00           H  
ATOM   2450  HG  LEU B   3       3.101  -1.348 -39.675  1.00  0.00           H  
ATOM   2451 1HD1 LEU B   3       2.731  -3.647 -40.451  1.00  0.00           H  
ATOM   2452 2HD1 LEU B   3       4.268  -2.988 -41.057  1.00  0.00           H  
ATOM   2453 3HD1 LEU B   3       4.267  -4.146 -39.706  1.00  0.00           H  
ATOM   2454 1HD2 LEU B   3       1.857  -2.909 -38.217  1.00  0.00           H  
ATOM   2455 2HD2 LEU B   3       3.381  -3.398 -37.439  1.00  0.00           H  
ATOM   2456 3HD2 LEU B   3       2.782  -1.732 -37.254  1.00  0.00           H  
ATOM   2457  N   ILE B   4       5.592   1.294 -40.138  1.00  0.00           N  
ATOM   2458  CA  ILE B   4       5.046   2.477 -40.786  1.00  0.00           C  
ATOM   2459  C   ILE B   4       5.400   2.452 -42.280  1.00  0.00           C  
ATOM   2460  O   ILE B   4       4.481   2.728 -43.080  1.00  0.00           O  
ATOM   2461  CB  ILE B   4       5.581   3.765 -40.135  1.00  0.00           C  
ATOM   2462  CG1 ILE B   4       5.038   3.909 -38.711  1.00  0.00           C  
ATOM   2463  CG2 ILE B   4       5.212   4.978 -40.974  1.00  0.00           C  
ATOM   2464  CD1 ILE B   4       5.720   4.991 -37.904  1.00  0.00           C  
ATOM   2465  H   ILE B   4       6.237   1.408 -39.370  1.00  0.00           H  
ATOM   2466  HA  ILE B   4       3.962   2.462 -40.675  1.00  0.00           H  
ATOM   2467  HB  ILE B   4       6.666   3.707 -40.054  1.00  0.00           H  
ATOM   2468 1HG1 ILE B   4       3.972   4.132 -38.749  1.00  0.00           H  
ATOM   2469 2HG1 ILE B   4       5.154   2.964 -38.180  1.00  0.00           H  
ATOM   2470 1HG2 ILE B   4       5.598   5.880 -40.500  1.00  0.00           H  
ATOM   2471 2HG2 ILE B   4       5.646   4.878 -41.969  1.00  0.00           H  
ATOM   2472 3HG2 ILE B   4       4.127   5.047 -41.057  1.00  0.00           H  
ATOM   2473 1HD1 ILE B   4       5.281   5.032 -36.907  1.00  0.00           H  
ATOM   2474 2HD1 ILE B   4       6.784   4.768 -37.823  1.00  0.00           H  
ATOM   2475 3HD1 ILE B   4       5.586   5.952 -38.398  1.00  0.00           H  
ATOM   2476  N   GLU B   5       6.596   2.001 -42.679  1.00  0.00           N  
ATOM   2477  CA  GLU B   5       6.986   1.941 -44.064  1.00  0.00           C  
ATOM   2478  C   GLU B   5       5.997   1.175 -44.905  1.00  0.00           C  
ATOM   2479  O   GLU B   5       5.601   1.761 -45.906  1.00  0.00           O  
ATOM   2480  CB  GLU B   5       8.371   1.303 -44.191  1.00  0.00           C  
ATOM   2481  CG  GLU B   5       8.924   1.277 -45.609  1.00  0.00           C  
ATOM   2482  CD  GLU B   5       9.304   2.641 -46.114  1.00  0.00           C  
ATOM   2483  OE1 GLU B   5       9.496   3.519 -45.308  1.00  0.00           O  
ATOM   2484  OE2 GLU B   5       9.402   2.804 -47.307  1.00  0.00           O  
ATOM   2485  H   GLU B   5       7.246   1.691 -41.971  1.00  0.00           H  
ATOM   2486  HA  GLU B   5       7.029   2.958 -44.455  1.00  0.00           H  
ATOM   2487 1HB  GLU B   5       9.081   1.845 -43.565  1.00  0.00           H  
ATOM   2488 2HB  GLU B   5       8.333   0.276 -43.827  1.00  0.00           H  
ATOM   2489 1HG  GLU B   5       9.804   0.635 -45.633  1.00  0.00           H  
ATOM   2490 2HG  GLU B   5       8.175   0.844 -46.271  1.00  0.00           H  
ATOM   2491  N   LEU B   6       5.413   0.073 -44.411  1.00  0.00           N  
ATOM   2492  CA  LEU B   6       4.355  -0.766 -45.047  1.00  0.00           C  
ATOM   2493  C   LEU B   6       3.079   0.024 -45.300  1.00  0.00           C  
ATOM   2494  O   LEU B   6       2.565   0.058 -46.394  1.00  0.00           O  
ATOM   2495  CB  LEU B   6       4.026  -1.977 -44.165  1.00  0.00           C  
ATOM   2496  CG  LEU B   6       2.894  -2.880 -44.671  1.00  0.00           C  
ATOM   2497  CD1 LEU B   6       3.223  -3.371 -46.074  1.00  0.00           C  
ATOM   2498  CD2 LEU B   6       2.708  -4.047 -43.712  1.00  0.00           C  
ATOM   2499  H   LEU B   6       5.761  -0.183 -43.498  1.00  0.00           H  
ATOM   2500  HA  LEU B   6       4.728  -1.125 -46.005  1.00  0.00           H  
ATOM   2501 1HB  LEU B   6       4.921  -2.590 -44.069  1.00  0.00           H  
ATOM   2502 2HB  LEU B   6       3.747  -1.619 -43.174  1.00  0.00           H  
ATOM   2503  HG  LEU B   6       1.968  -2.306 -44.727  1.00  0.00           H  
ATOM   2504 1HD1 LEU B   6       2.418  -4.013 -46.433  1.00  0.00           H  
ATOM   2505 2HD1 LEU B   6       3.331  -2.517 -46.742  1.00  0.00           H  
ATOM   2506 3HD1 LEU B   6       4.155  -3.936 -46.052  1.00  0.00           H  
ATOM   2507 1HD2 LEU B   6       1.903  -4.688 -44.071  1.00  0.00           H  
ATOM   2508 2HD2 LEU B   6       3.633  -4.622 -43.656  1.00  0.00           H  
ATOM   2509 3HD2 LEU B   6       2.456  -3.668 -42.722  1.00  0.00           H  
ATOM   2510  N   MET B   7       2.629   0.806 -44.300  1.00  0.00           N  
ATOM   2511  CA  MET B   7       1.522   1.737 -44.433  1.00  0.00           C  
ATOM   2512  C   MET B   7       1.706   2.847 -45.523  1.00  0.00           C  
ATOM   2513  O   MET B   7       0.792   3.171 -46.288  1.00  0.00           O  
ATOM   2514  CB  MET B   7       1.270   2.375 -43.068  1.00  0.00           C  
ATOM   2515  CG  MET B   7       0.105   3.354 -43.036  1.00  0.00           C  
ATOM   2516  SD  MET B   7       0.567   5.004 -43.600  1.00  0.00           S  
ATOM   2517  CE  MET B   7       1.588   5.554 -42.236  1.00  0.00           C  
ATOM   2518  H   MET B   7       3.102   0.727 -43.411  1.00  0.00           H  
ATOM   2519  HA  MET B   7       0.639   1.181 -44.748  1.00  0.00           H  
ATOM   2520 1HB  MET B   7       1.072   1.596 -42.333  1.00  0.00           H  
ATOM   2521 2HB  MET B   7       2.165   2.909 -42.746  1.00  0.00           H  
ATOM   2522 1HG  MET B   7      -0.698   2.984 -43.673  1.00  0.00           H  
ATOM   2523 2HG  MET B   7      -0.276   3.433 -42.018  1.00  0.00           H  
ATOM   2524 1HE  MET B   7       1.951   6.563 -42.437  1.00  0.00           H  
ATOM   2525 2HE  MET B   7       0.998   5.556 -41.318  1.00  0.00           H  
ATOM   2526 3HE  MET B   7       2.437   4.879 -42.121  1.00  0.00           H  
ATOM   2527  N   ILE B   8       3.002   3.319 -45.660  1.00  0.00           N  
ATOM   2528  CA  ILE B   8       3.399   4.358 -46.613  1.00  0.00           C  
ATOM   2529  C   ILE B   8       3.326   3.795 -48.041  1.00  0.00           C  
ATOM   2530  O   ILE B   8       2.631   4.373 -48.818  1.00  0.00           O  
ATOM   2531  CB  ILE B   8       4.821   4.872 -46.321  1.00  0.00           C  
ATOM   2532  CG1 ILE B   8       4.859   5.599 -44.974  1.00  0.00           C  
ATOM   2533  CG2 ILE B   8       5.295   5.789 -47.437  1.00  0.00           C  
ATOM   2534  CD1 ILE B   8       6.256   5.897 -44.480  1.00  0.00           C  
ATOM   2535  H   ILE B   8       3.702   2.909 -45.058  1.00  0.00           H  
ATOM   2536  HA  ILE B   8       2.708   5.195 -46.520  1.00  0.00           H  
ATOM   2537  HB  ILE B   8       5.504   4.027 -46.242  1.00  0.00           H  
ATOM   2538 1HG1 ILE B   8       4.317   6.541 -45.053  1.00  0.00           H  
ATOM   2539 2HG1 ILE B   8       4.354   4.995 -44.220  1.00  0.00           H  
ATOM   2540 1HG2 ILE B   8       6.301   6.144 -47.214  1.00  0.00           H  
ATOM   2541 2HG2 ILE B   8       5.304   5.241 -48.379  1.00  0.00           H  
ATOM   2542 3HG2 ILE B   8       4.620   6.641 -47.520  1.00  0.00           H  
ATOM   2543 1HD1 ILE B   8       6.201   6.412 -43.521  1.00  0.00           H  
ATOM   2544 2HD1 ILE B   8       6.806   4.963 -44.359  1.00  0.00           H  
ATOM   2545 3HD1 ILE B   8       6.769   6.530 -45.202  1.00  0.00           H  
ATOM   2546  N   VAL B   9       3.879   2.629 -48.328  1.00  0.00           N  
ATOM   2547  CA  VAL B   9       4.019   2.063 -49.729  1.00  0.00           C  
ATOM   2548  C   VAL B   9       2.553   1.647 -50.196  1.00  0.00           C  
ATOM   2549  O   VAL B   9       2.252   1.676 -51.391  1.00  0.00           O  
ATOM   2550  CB  VAL B   9       4.963   0.847 -49.756  1.00  0.00           C  
ATOM   2551  CG1 VAL B   9       6.356   1.243 -49.291  1.00  0.00           C  
ATOM   2552  CG2 VAL B   9       4.399  -0.265 -48.884  1.00  0.00           C  
ATOM   2553  H   VAL B   9       4.226   2.094 -47.545  1.00  0.00           H  
ATOM   2554  HA  VAL B   9       4.442   2.835 -50.373  1.00  0.00           H  
ATOM   2555  HB  VAL B   9       5.056   0.493 -50.783  1.00  0.00           H  
ATOM   2556 1HG1 VAL B   9       7.010   0.371 -49.316  1.00  0.00           H  
ATOM   2557 2HG1 VAL B   9       6.754   2.014 -49.951  1.00  0.00           H  
ATOM   2558 3HG1 VAL B   9       6.304   1.627 -48.272  1.00  0.00           H  
ATOM   2559 1HG2 VAL B   9       5.071  -1.122 -48.908  1.00  0.00           H  
ATOM   2560 2HG2 VAL B   9       4.301   0.091 -47.858  1.00  0.00           H  
ATOM   2561 3HG2 VAL B   9       3.420  -0.561 -49.260  1.00  0.00           H  
ATOM   2562  N   ILE B  10       1.643   1.324 -49.296  1.00  0.00           N  
ATOM   2563  CA  ILE B  10       0.165   1.042 -49.638  1.00  0.00           C  
ATOM   2564  C   ILE B  10      -0.739   2.344 -49.666  1.00  0.00           C  
ATOM   2565  O   ILE B  10      -1.696   2.417 -50.454  1.00  0.00           O  
ATOM   2566  CB  ILE B  10      -0.443   0.046 -48.633  1.00  0.00           C  
ATOM   2567  CG1 ILE B  10      -0.547   0.684 -47.246  1.00  0.00           C  
ATOM   2568  CG2 ILE B  10       0.389  -1.226 -48.576  1.00  0.00           C  
ATOM   2569  CD1 ILE B  10      -1.343  -0.135 -46.255  1.00  0.00           C  
ATOM   2570  H   ILE B  10       1.946   1.261 -48.335  1.00  0.00           H  
ATOM   2571  HA  ILE B  10       0.119   0.602 -50.634  1.00  0.00           H  
ATOM   2572  HB  ILE B  10      -1.457  -0.207 -48.941  1.00  0.00           H  
ATOM   2573 1HG1 ILE B  10       0.452   0.836 -46.839  1.00  0.00           H  
ATOM   2574 2HG1 ILE B  10      -1.016   1.665 -47.331  1.00  0.00           H  
ATOM   2575 1HG2 ILE B  10      -0.054  -1.919 -47.861  1.00  0.00           H  
ATOM   2576 2HG2 ILE B  10       0.413  -1.689 -49.562  1.00  0.00           H  
ATOM   2577 3HG2 ILE B  10       1.405  -0.983 -48.264  1.00  0.00           H  
ATOM   2578 1HD1 ILE B  10      -1.373   0.383 -45.296  1.00  0.00           H  
ATOM   2579 2HD1 ILE B  10      -2.359  -0.269 -46.627  1.00  0.00           H  
ATOM   2580 3HD1 ILE B  10      -0.872  -1.108 -46.127  1.00  0.00           H  
ATOM   2581  N   ALA B  11      -0.341   3.438 -49.032  1.00  0.00           N  
ATOM   2582  CA  ALA B  11      -0.963   4.772 -49.134  1.00  0.00           C  
ATOM   2583  C   ALA B  11      -0.790   5.306 -50.547  1.00  0.00           C  
ATOM   2584  O   ALA B  11      -1.610   6.111 -50.903  1.00  0.00           O  
ATOM   2585  CB  ALA B  11      -0.358   5.770 -48.153  1.00  0.00           C  
ATOM   2586  H   ALA B  11       0.463   3.315 -48.434  1.00  0.00           H  
ATOM   2587  HA  ALA B  11      -2.027   4.667 -48.922  1.00  0.00           H  
ATOM   2588 1HB  ALA B  11      -0.849   6.737 -48.267  1.00  0.00           H  
ATOM   2589 2HB  ALA B  11      -0.499   5.410 -47.134  1.00  0.00           H  
ATOM   2590 3HB  ALA B  11       0.706   5.879 -48.355  1.00  0.00           H  
ATOM   2591  N   ILE B  12       0.186   4.876 -51.378  1.00  0.00           N  
ATOM   2592  CA  ILE B  12       0.382   5.364 -52.738  1.00  0.00           C  
ATOM   2593  C   ILE B  12      -0.856   5.111 -53.625  1.00  0.00           C  
ATOM   2594  O   ILE B  12      -1.347   6.075 -54.238  1.00  0.00           O  
ATOM   2595  CB  ILE B  12       1.618   4.701 -53.374  1.00  0.00           C  
ATOM   2596  CG1 ILE B  12       2.895   5.172 -52.675  1.00  0.00           C  
ATOM   2597  CG2 ILE B  12       1.678   5.007 -54.863  1.00  0.00           C  
ATOM   2598  CD1 ILE B  12       4.121   4.361 -53.031  1.00  0.00           C  
ATOM   2599  H   ILE B  12       0.810   4.170 -51.014  1.00  0.00           H  
ATOM   2600  HA  ILE B  12       0.545   6.441 -52.699  1.00  0.00           H  
ATOM   2601  HB  ILE B  12       1.562   3.622 -53.237  1.00  0.00           H  
ATOM   2602 1HG1 ILE B  12       3.088   6.213 -52.932  1.00  0.00           H  
ATOM   2603 2HG1 ILE B  12       2.758   5.123 -51.594  1.00  0.00           H  
ATOM   2604 1HG2 ILE B  12       2.558   4.531 -55.296  1.00  0.00           H  
ATOM   2605 2HG2 ILE B  12       0.782   4.624 -55.349  1.00  0.00           H  
ATOM   2606 3HG2 ILE B  12       1.739   6.085 -55.011  1.00  0.00           H  
ATOM   2607 1HD1 ILE B  12       4.985   4.755 -52.496  1.00  0.00           H  
ATOM   2608 2HD1 ILE B  12       3.962   3.320 -52.749  1.00  0.00           H  
ATOM   2609 3HD1 ILE B  12       4.299   4.424 -54.104  1.00  0.00           H  
ATOM   2610  N   VAL B  13      -1.416   3.909 -53.742  1.00  0.00           N  
ATOM   2611  CA  VAL B  13      -2.599   3.466 -54.489  1.00  0.00           C  
ATOM   2612  C   VAL B  13      -3.857   4.009 -53.840  1.00  0.00           C  
ATOM   2613  O   VAL B  13      -4.783   4.340 -54.588  1.00  0.00           O  
ATOM   2614  CB  VAL B  13      -2.672   1.928 -54.539  1.00  0.00           C  
ATOM   2615  CG1 VAL B  13      -3.144   1.374 -53.203  1.00  0.00           C  
ATOM   2616  CG2 VAL B  13      -3.599   1.490 -55.663  1.00  0.00           C  
ATOM   2617  H   VAL B  13      -0.892   3.233 -53.205  1.00  0.00           H  
ATOM   2618  HA  VAL B  13      -2.524   3.841 -55.510  1.00  0.00           H  
ATOM   2619  HB  VAL B  13      -1.672   1.532 -54.716  1.00  0.00           H  
ATOM   2620 1HG1 VAL B  13      -3.190   0.286 -53.256  1.00  0.00           H  
ATOM   2621 2HG1 VAL B  13      -2.447   1.669 -52.420  1.00  0.00           H  
ATOM   2622 3HG1 VAL B  13      -4.135   1.767 -52.976  1.00  0.00           H  
ATOM   2623 1HG2 VAL B  13      -3.646   0.402 -55.692  1.00  0.00           H  
ATOM   2624 2HG2 VAL B  13      -4.598   1.892 -55.488  1.00  0.00           H  
ATOM   2625 3HG2 VAL B  13      -3.220   1.863 -56.614  1.00  0.00           H  
ATOM   2626  N   GLY B  14      -3.922   4.265 -52.558  1.00  0.00           N  
ATOM   2627  CA  GLY B  14      -5.051   4.970 -51.914  1.00  0.00           C  
ATOM   2628  C   GLY B  14      -5.145   6.373 -52.342  1.00  0.00           C  
ATOM   2629  O   GLY B  14      -6.233   6.950 -52.596  1.00  0.00           O  
ATOM   2630  H   GLY B  14      -3.147   3.955 -51.989  1.00  0.00           H  
ATOM   2631 1HA  GLY B  14      -5.984   4.459 -52.154  1.00  0.00           H  
ATOM   2632 2HA  GLY B  14      -4.934   4.932 -50.832  1.00  0.00           H  
ATOM   2633  N   ILE B  15      -3.971   7.021 -52.476  1.00  0.00           N  
ATOM   2634  CA  ILE B  15      -3.833   8.443 -53.059  1.00  0.00           C  
ATOM   2635  C   ILE B  15      -4.151   8.464 -54.600  1.00  0.00           C  
ATOM   2636  O   ILE B  15      -5.048   9.237 -54.985  1.00  0.00           O  
ATOM   2637  CB  ILE B  15      -2.418   9.007 -52.834  1.00  0.00           C  
ATOM   2638  CG1 ILE B  15      -2.167   9.242 -51.342  1.00  0.00           C  
ATOM   2639  CG2 ILE B  15      -2.229  10.296 -53.618  1.00  0.00           C  
ATOM   2640  CD1 ILE B  15      -0.718   9.502 -51.000  1.00  0.00           C  
ATOM   2641  H   ILE B  15      -3.141   6.532 -52.171  1.00  0.00           H  
ATOM   2642  HA  ILE B  15      -4.543   9.095 -52.553  1.00  0.00           H  
ATOM   2643  HB  ILE B  15      -1.679   8.279 -53.167  1.00  0.00           H  
ATOM   2644 1HG1 ILE B  15      -2.757  10.093 -51.004  1.00  0.00           H  
ATOM   2645 2HG1 ILE B  15      -2.499   8.371 -50.776  1.00  0.00           H  
ATOM   2646 1HG2 ILE B  15      -1.224  10.682 -53.448  1.00  0.00           H  
ATOM   2647 2HG2 ILE B  15      -2.366  10.099 -54.681  1.00  0.00           H  
ATOM   2648 3HG2 ILE B  15      -2.961  11.034 -53.289  1.00  0.00           H  
ATOM   2649 1HD1 ILE B  15      -0.621   9.659 -49.925  1.00  0.00           H  
ATOM   2650 2HD1 ILE B  15      -0.114   8.645 -51.298  1.00  0.00           H  
ATOM   2651 3HD1 ILE B  15      -0.374  10.391 -51.528  1.00  0.00           H  
ATOM   2652  N   LEU B  16      -3.629   7.523 -55.387  1.00  0.00           N  
ATOM   2653  CA  LEU B  16      -3.753   7.491 -56.825  1.00  0.00           C  
ATOM   2654  C   LEU B  16      -5.125   6.828 -57.226  1.00  0.00           C  
ATOM   2655  O   LEU B  16      -5.410   6.610 -58.403  1.00  0.00           O  
ATOM   2656  CB  LEU B  16      -2.572   6.719 -57.428  1.00  0.00           C  
ATOM   2657  CG  LEU B  16      -1.187   7.339 -57.203  1.00  0.00           C  
ATOM   2658  CD1 LEU B  16      -0.119   6.421 -57.780  1.00  0.00           C  
ATOM   2659  CD2 LEU B  16      -1.135   8.714 -57.852  1.00  0.00           C  
ATOM   2660  H   LEU B  16      -3.115   6.789 -54.921  1.00  0.00           H  
ATOM   2661  HA  LEU B  16      -3.734   8.515 -57.197  1.00  0.00           H  
ATOM   2662 1HB  LEU B  16      -2.559   5.717 -57.003  1.00  0.00           H  
ATOM   2663 2HB  LEU B  16      -2.726   6.633 -58.504  1.00  0.00           H  
ATOM   2664  HG  LEU B  16      -1.001   7.436 -56.133  1.00  0.00           H  
ATOM   2665 1HD1 LEU B  16       0.865   6.861 -57.620  1.00  0.00           H  
ATOM   2666 2HD1 LEU B  16      -0.166   5.451 -57.284  1.00  0.00           H  
ATOM   2667 3HD1 LEU B  16      -0.288   6.292 -58.848  1.00  0.00           H  
ATOM   2668 1HD2 LEU B  16      -0.151   9.156 -57.691  1.00  0.00           H  
ATOM   2669 2HD2 LEU B  16      -1.319   8.619 -58.922  1.00  0.00           H  
ATOM   2670 3HD2 LEU B  16      -1.897   9.355 -57.408  1.00  0.00           H  
ATOM   2671  N   ALA B  17      -5.923   6.504 -56.217  1.00  0.00           N  
ATOM   2672  CA  ALA B  17      -7.314   6.099 -56.443  1.00  0.00           C  
ATOM   2673  C   ALA B  17      -8.277   7.322 -56.432  1.00  0.00           C  
ATOM   2674  O   ALA B  17      -9.439   7.260 -56.867  1.00  0.00           O  
ATOM   2675  CB  ALA B  17      -7.702   5.137 -55.295  1.00  0.00           C  
ATOM   2676  H   ALA B  17      -5.568   6.536 -55.272  1.00  0.00           H  
ATOM   2677  HA  ALA B  17      -7.377   5.644 -57.431  1.00  0.00           H  
ATOM   2678 1HB  ALA B  17      -8.734   4.811 -55.426  1.00  0.00           H  
ATOM   2679 2HB  ALA B  17      -7.043   4.269 -55.309  1.00  0.00           H  
ATOM   2680 3HB  ALA B  17      -7.603   5.652 -54.340  1.00  0.00           H  
ATOM   2681  N   ALA B  18      -7.747   8.519 -56.159  1.00  0.00           N  
ATOM   2682  CA  ALA B  18      -8.465   9.801 -56.109  1.00  0.00           C  
ATOM   2683  C   ALA B  18      -7.997  10.889 -57.083  1.00  0.00           C  
ATOM   2684  O   ALA B  18      -7.582  11.966 -56.704  1.00  0.00           O  
ATOM   2685  CB  ALA B  18      -8.503  10.307 -54.665  1.00  0.00           C  
ATOM   2686  H   ALA B  18      -6.754   8.504 -55.975  1.00  0.00           H  
ATOM   2687  HA  ALA B  18      -9.505   9.618 -56.381  1.00  0.00           H  
ATOM   2688 1HB  ALA B  18      -9.035  11.258 -54.627  1.00  0.00           H  
ATOM   2689 2HB  ALA B  18      -9.015   9.579 -54.037  1.00  0.00           H  
ATOM   2690 3HB  ALA B  18      -7.486  10.447 -54.303  1.00  0.00           H  
ATOM   2691  N   VAL B  19      -8.173  10.669 -58.396  1.00  0.00           N  
ATOM   2692  CA  VAL B  19      -7.906  11.535 -59.557  1.00  0.00           C  
ATOM   2693  C   VAL B  19      -6.546  12.016 -59.914  1.00  0.00           C  
ATOM   2694  O   VAL B  19      -6.129  11.964 -61.072  1.00  0.00           O  
ATOM   2695  CB  VAL B  19      -8.762  12.806 -59.405  1.00  0.00           C  
ATOM   2696  CG1 VAL B  19      -8.435  13.803 -60.507  1.00  0.00           C  
ATOM   2697  CG2 VAL B  19     -10.238  12.442 -59.427  1.00  0.00           C  
ATOM   2698  H   VAL B  19      -8.551   9.745 -58.548  1.00  0.00           H  
ATOM   2699  HA  VAL B  19      -8.194  10.999 -60.462  1.00  0.00           H  
ATOM   2700  HB  VAL B  19      -8.519  13.285 -58.456  1.00  0.00           H  
ATOM   2701 1HG1 VAL B  19      -9.049  14.696 -60.384  1.00  0.00           H  
ATOM   2702 2HG1 VAL B  19      -7.382  14.077 -60.449  1.00  0.00           H  
ATOM   2703 3HG1 VAL B  19      -8.641  13.353 -61.478  1.00  0.00           H  
ATOM   2704 1HG2 VAL B  19     -10.837  13.346 -59.319  1.00  0.00           H  
ATOM   2705 2HG2 VAL B  19     -10.479  11.958 -60.374  1.00  0.00           H  
ATOM   2706 3HG2 VAL B  19     -10.457  11.761 -58.605  1.00  0.00           H  
ATOM   2707  N   ALA B  20      -5.713  12.510 -58.948  1.00  0.00           N  
ATOM   2708  CA  ALA B  20      -4.406  13.066 -59.172  1.00  0.00           C  
ATOM   2709  C   ALA B  20      -3.301  12.028 -59.606  1.00  0.00           C  
ATOM   2710  O   ALA B  20      -2.415  11.731 -58.843  1.00  0.00           O  
ATOM   2711  CB  ALA B  20      -4.035  13.872 -57.905  1.00  0.00           C  
ATOM   2712  H   ALA B  20      -6.075  12.467 -58.006  1.00  0.00           H  
ATOM   2713  HA  ALA B  20      -4.474  13.767 -60.004  1.00  0.00           H  
ATOM   2714 1HB  ALA B  20      -3.047  14.314 -58.031  1.00  0.00           H  
ATOM   2715 2HB  ALA B  20      -4.769  14.663 -57.750  1.00  0.00           H  
ATOM   2716 3HB  ALA B  20      -4.029  13.209 -57.042  1.00  0.00           H  
ATOM   2717  N   LEU B  21      -3.460  11.357 -60.735  1.00  0.00           N  
ATOM   2718  CA  LEU B  21      -2.511  10.370 -61.327  1.00  0.00           C  
ATOM   2719  C   LEU B  21      -1.459  11.162 -62.176  1.00  0.00           C  
ATOM   2720  O   LEU B  21      -1.812  11.915 -63.097  1.00  0.00           O  
ATOM   2721  CB  LEU B  21      -3.252   9.349 -62.200  1.00  0.00           C  
ATOM   2722  CG  LEU B  21      -3.997   8.242 -61.443  1.00  0.00           C  
ATOM   2723  CD1 LEU B  21      -5.199   8.839 -60.723  1.00  0.00           C  
ATOM   2724  CD2 LEU B  21      -4.426   7.159 -62.420  1.00  0.00           C  
ATOM   2725  H   LEU B  21      -4.323  11.559 -61.218  1.00  0.00           H  
ATOM   2726  HA  LEU B  21      -2.018   9.834 -60.516  1.00  0.00           H  
ATOM   2727 1HB  LEU B  21      -3.980   9.879 -62.812  1.00  0.00           H  
ATOM   2728 2HB  LEU B  21      -2.531   8.870 -62.863  1.00  0.00           H  
ATOM   2729  HG  LEU B  21      -3.338   7.810 -60.689  1.00  0.00           H  
ATOM   2730 1HD1 LEU B  21      -5.728   8.052 -60.185  1.00  0.00           H  
ATOM   2731 2HD1 LEU B  21      -4.861   9.597 -60.017  1.00  0.00           H  
ATOM   2732 3HD1 LEU B  21      -5.869   9.294 -61.452  1.00  0.00           H  
ATOM   2733 1HD2 LEU B  21      -4.955   6.371 -61.882  1.00  0.00           H  
ATOM   2734 2HD2 LEU B  21      -5.087   7.589 -63.174  1.00  0.00           H  
ATOM   2735 3HD2 LEU B  21      -3.547   6.738 -62.907  1.00  0.00           H  
ATOM   2736  N   PRO B  22      -0.179  11.158 -61.777  1.00  0.00           N  
ATOM   2737  CA  PRO B  22       0.949  11.908 -62.461  1.00  0.00           C  
ATOM   2738  C   PRO B  22       1.075  11.813 -64.002  1.00  0.00           C  
ATOM   2739  O   PRO B  22       1.376  10.746 -64.608  1.00  0.00           O  
ATOM   2740  CB  PRO B  22       2.180  11.277 -61.802  1.00  0.00           C  
ATOM   2741  CG  PRO B  22       1.711  10.895 -60.440  1.00  0.00           C  
ATOM   2742  CD  PRO B  22       0.322  10.357 -60.660  1.00  0.00           C  
ATOM   2743  HA  PRO B  22       0.867  12.979 -62.224  1.00  0.00           H  
ATOM   2744 1HB  PRO B  22       2.523  10.415 -62.393  1.00  0.00           H  
ATOM   2745 2HB  PRO B  22       3.008  12.001 -61.781  1.00  0.00           H  
ATOM   2746 1HG  PRO B  22       2.390  10.150 -59.999  1.00  0.00           H  
ATOM   2747 2HG  PRO B  22       1.725  11.770 -59.774  1.00  0.00           H  
ATOM   2748 1HD  PRO B  22       0.379   9.289 -60.920  1.00  0.00           H  
ATOM   2749 2HD  PRO B  22      -0.276  10.502 -59.749  1.00  0.00           H  
ATOM   2750  N   ALA B  23       0.699  12.903 -64.581  1.00  0.00           N  
ATOM   2751  CA  ALA B  23       0.539  13.074 -66.031  1.00  0.00           C  
ATOM   2752  C   ALA B  23      -0.415  12.138 -66.744  1.00  0.00           C  
ATOM   2753  O   ALA B  23      -0.388  12.085 -68.013  1.00  0.00           O  
ATOM   2754  CB  ALA B  23       1.946  13.105 -66.699  1.00  0.00           C  
ATOM   2755  H   ALA B  23       0.506  13.683 -63.970  1.00  0.00           H  
ATOM   2756  HA  ALA B  23       0.124  14.065 -66.211  1.00  0.00           H  
ATOM   2757 1HB  ALA B  23       1.834  13.232 -67.776  1.00  0.00           H  
ATOM   2758 2HB  ALA B  23       2.523  13.936 -66.294  1.00  0.00           H  
ATOM   2759 3HB  ALA B  23       2.465  12.170 -66.497  1.00  0.00           H  
ATOM   2760  N   TYR B  24      -1.304  11.467 -66.062  1.00  0.00           N  
ATOM   2761  CA  TYR B  24      -2.269  10.558 -66.648  1.00  0.00           C  
ATOM   2762  C   TYR B  24      -3.272  11.227 -67.598  1.00  0.00           C  
ATOM   2763  O   TYR B  24      -3.367  10.844 -68.760  1.00  0.00           O  
ATOM   2764  CB  TYR B  24      -3.019   9.829 -65.531  1.00  0.00           C  
ATOM   2765  CG  TYR B  24      -4.115   8.913 -66.028  1.00  0.00           C  
ATOM   2766  CD1 TYR B  24      -3.807   7.631 -66.456  1.00  0.00           C  
ATOM   2767  CD2 TYR B  24      -5.429   9.356 -66.057  1.00  0.00           C  
ATOM   2768  CE1 TYR B  24      -4.808   6.794 -66.911  1.00  0.00           C  
ATOM   2769  CE2 TYR B  24      -6.431   8.520 -66.511  1.00  0.00           C  
ATOM   2770  CZ  TYR B  24      -6.123   7.244 -66.937  1.00  0.00           C  
ATOM   2771  OH  TYR B  24      -7.121   6.411 -67.389  1.00  0.00           O  
ATOM   2772  H   TYR B  24      -1.304  11.606 -65.061  1.00  0.00           H  
ATOM   2773  HA  TYR B  24      -1.732   9.829 -67.255  1.00  0.00           H  
ATOM   2774 1HB  TYR B  24      -2.315   9.233 -64.949  1.00  0.00           H  
ATOM   2775 2HB  TYR B  24      -3.466  10.559 -64.857  1.00  0.00           H  
ATOM   2776  HD1 TYR B  24      -2.774   7.282 -66.434  1.00  0.00           H  
ATOM   2777  HD2 TYR B  24      -5.672  10.365 -65.722  1.00  0.00           H  
ATOM   2778  HE1 TYR B  24      -4.565   5.786 -67.247  1.00  0.00           H  
ATOM   2779  HE2 TYR B  24      -7.463   8.869 -66.534  1.00  0.00           H  
ATOM   2780  HH  TYR B  24      -7.957   6.882 -67.382  1.00  0.00           H  
ATOM   2781  N   GLN B  25      -3.928  12.278 -67.133  1.00  0.00           N  
ATOM   2782  CA  GLN B  25      -4.980  13.137 -67.798  1.00  0.00           C  
ATOM   2783  C   GLN B  25      -4.278  13.702 -68.976  1.00  0.00           C  
ATOM   2784  O   GLN B  25      -4.924  13.816 -69.982  1.00  0.00           O  
ATOM   2785  CB  GLN B  25      -5.519  14.257 -66.904  1.00  0.00           C  
ATOM   2786  CG  GLN B  25      -6.640  15.069 -67.530  1.00  0.00           C  
ATOM   2787  CD  GLN B  25      -7.296  16.011 -66.538  1.00  0.00           C  
ATOM   2788  OE1 GLN B  25      -7.347  15.733 -65.337  1.00  0.00           O  
ATOM   2789  NE2 GLN B  25      -7.803  17.133 -67.036  1.00  0.00           N  
ATOM   2790  H   GLN B  25      -3.644  12.492 -66.188  1.00  0.00           H  
ATOM   2791  HA  GLN B  25      -5.827  12.504 -68.062  1.00  0.00           H  
ATOM   2792 1HB  GLN B  25      -5.893  13.830 -65.972  1.00  0.00           H  
ATOM   2793 2HB  GLN B  25      -4.710  14.940 -66.649  1.00  0.00           H  
ATOM   2794 1HG  GLN B  25      -6.231  15.663 -68.347  1.00  0.00           H  
ATOM   2795 2HG  GLN B  25      -7.401  14.387 -67.909  1.00  0.00           H  
ATOM   2796 1HE2 GLN B  25      -8.248  17.793 -66.430  1.00  0.00           H  
ATOM   2797 2HE2 GLN B  25      -7.739  17.319 -68.016  1.00  0.00           H  
ATOM   2798  N   ASP B  26      -3.002  14.155 -68.848  1.00  0.00           N  
ATOM   2799  CA  ASP B  26      -2.195  14.746 -69.909  1.00  0.00           C  
ATOM   2800  C   ASP B  26      -2.042  13.876 -71.093  1.00  0.00           C  
ATOM   2801  O   ASP B  26      -2.274  14.322 -72.229  1.00  0.00           O  
ATOM   2802  CB  ASP B  26      -0.800  15.101 -69.389  1.00  0.00           C  
ATOM   2803  CG  ASP B  26      -0.809  16.281 -68.426  1.00  0.00           C  
ATOM   2804  OD1 ASP B  26      -1.829  16.919 -68.309  1.00  0.00           O  
ATOM   2805  OD2 ASP B  26       0.203  16.534 -67.818  1.00  0.00           O  
ATOM   2806  H   ASP B  26      -2.606  14.059 -67.923  1.00  0.00           H  
ATOM   2807  HA  ASP B  26      -2.684  15.661 -70.247  1.00  0.00           H  
ATOM   2808 1HB  ASP B  26      -0.372  14.238 -68.878  1.00  0.00           H  
ATOM   2809 2HB  ASP B  26      -0.148  15.341 -70.229  1.00  0.00           H  
ATOM   2810  N   TYR B  27      -1.673  12.587 -70.918  1.00  0.00           N  
ATOM   2811  CA  TYR B  27      -1.532  11.592 -72.017  1.00  0.00           C  
ATOM   2812  C   TYR B  27      -2.855  10.948 -72.487  1.00  0.00           C  
ATOM   2813  O   TYR B  27      -2.903  10.571 -73.665  1.00  0.00           O  
ATOM   2814  CB  TYR B  27      -0.562  10.489 -71.588  1.00  0.00           C  
ATOM   2815  CG  TYR B  27       0.895  10.884 -71.693  1.00  0.00           C  
ATOM   2816  CD1 TYR B  27       1.544  11.437 -70.599  1.00  0.00           C  
ATOM   2817  CD2 TYR B  27       1.582  10.692 -72.883  1.00  0.00           C  
ATOM   2818  CE1 TYR B  27       2.874  11.798 -70.695  1.00  0.00           C  
ATOM   2819  CE2 TYR B  27       2.912  11.052 -72.978  1.00  0.00           C  
ATOM   2820  CZ  TYR B  27       3.557  11.603 -71.890  1.00  0.00           C  
ATOM   2821  OH  TYR B  27       4.882  11.962 -71.985  1.00  0.00           O  
ATOM   2822  H   TYR B  27      -1.485  12.300 -69.968  1.00  0.00           H  
ATOM   2823  HA  TYR B  27      -1.130  12.100 -72.894  1.00  0.00           H  
ATOM   2824 1HB  TYR B  27      -0.765  10.208 -70.554  1.00  0.00           H  
ATOM   2825 2HB  TYR B  27      -0.720   9.605 -72.205  1.00  0.00           H  
ATOM   2826  HD1 TYR B  27       1.004  11.588 -69.664  1.00  0.00           H  
ATOM   2827  HD2 TYR B  27       1.071  10.258 -73.743  1.00  0.00           H  
ATOM   2828  HE1 TYR B  27       3.384  12.233 -69.836  1.00  0.00           H  
ATOM   2829  HE2 TYR B  27       3.451  10.902 -73.914  1.00  0.00           H  
ATOM   2830  HH  TYR B  27       5.122  12.055 -72.911  1.00  0.00           H  
ATOM   2831  N   THR B  28      -3.902  10.853 -71.692  1.00  0.00           N  
ATOM   2832  CA  THR B  28      -5.191  10.438 -72.172  1.00  0.00           C  
ATOM   2833  C   THR B  28      -5.969  11.455 -73.031  1.00  0.00           C  
ATOM   2834  O   THR B  28      -6.710  11.036 -73.935  1.00  0.00           O  
ATOM   2835  CB  THR B  28      -6.062  10.030 -70.969  1.00  0.00           C  
ATOM   2836  OG1 THR B  28      -6.172  11.134 -70.060  1.00  0.00           O  
ATOM   2837  CG2 THR B  28      -5.449   8.841 -70.245  1.00  0.00           C  
ATOM   2838  H   THR B  28      -3.791  11.080 -70.714  1.00  0.00           H  
ATOM   2839  HA  THR B  28      -5.055   9.578 -72.829  1.00  0.00           H  
ATOM   2840  HB  THR B  28      -7.060   9.763 -71.317  1.00  0.00           H  
ATOM   2841  HG1 THR B  28      -5.361  11.211 -69.552  1.00  0.00           H  
ATOM   2842 1HG2 THR B  28      -6.079   8.567 -69.399  1.00  0.00           H  
ATOM   2843 2HG2 THR B  28      -5.375   7.997 -70.931  1.00  0.00           H  
ATOM   2844 3HG2 THR B  28      -4.455   9.106 -69.887  1.00  0.00           H  
ATOM   2845  N   ALA B  29      -5.544  12.769 -72.882  1.00  0.00           N  
ATOM   2846  CA  ALA B  29      -5.966  13.768 -73.820  1.00  0.00           C  
ATOM   2847  C   ALA B  29      -5.475  13.455 -75.250  1.00  0.00           C  
ATOM   2848  O   ALA B  29      -6.277  13.500 -76.190  1.00  0.00           O  
ATOM   2849  CB  ALA B  29      -5.549  15.150 -73.347  1.00  0.00           C  
ATOM   2850  H   ALA B  29      -4.939  13.035 -72.118  1.00  0.00           H  
ATOM   2851  HA  ALA B  29      -7.056  13.768 -73.847  1.00  0.00           H  
ATOM   2852 1HB  ALA B  29      -5.876  15.897 -74.070  1.00  0.00           H  
ATOM   2853 2HB  ALA B  29      -6.006  15.357 -72.379  1.00  0.00           H  
ATOM   2854 3HB  ALA B  29      -4.465  15.190 -73.251  1.00  0.00           H  
ATOM   2855  N   ARG B  30      -4.213  12.935 -75.329  1.00  0.00           N  
ATOM   2856  CA  ARG B  30      -3.648  12.480 -76.607  1.00  0.00           C  
ATOM   2857  C   ARG B  30      -4.341  11.336 -77.306  1.00  0.00           C  
ATOM   2858  O   ARG B  30      -4.673  11.383 -78.494  1.00  0.00           O  
ATOM   2859  CB  ARG B  30      -2.198  12.070 -76.398  1.00  0.00           C  
ATOM   2860  CG  ARG B  30      -1.256  13.210 -76.043  1.00  0.00           C  
ATOM   2861  CD  ARG B  30       0.151  12.747 -75.938  1.00  0.00           C  
ATOM   2862  NE  ARG B  30       1.047  13.821 -75.540  1.00  0.00           N  
ATOM   2863  CZ  ARG B  30       2.389  13.719 -75.490  1.00  0.00           C  
ATOM   2864  NH1 ARG B  30       2.975  12.587 -75.814  1.00  0.00           N  
ATOM   2865  NH2 ARG B  30       3.118  14.756 -75.115  1.00  0.00           N  
ATOM   2866  H   ARG B  30      -3.655  12.862 -74.490  1.00  0.00           H  
ATOM   2867  HA  ARG B  30      -3.689  13.306 -77.318  1.00  0.00           H  
ATOM   2868 1HB  ARG B  30      -2.140  11.334 -75.597  1.00  0.00           H  
ATOM   2869 2HB  ARG B  30      -1.818  11.599 -77.304  1.00  0.00           H  
ATOM   2870 1HG  ARG B  30      -1.308  13.978 -76.815  1.00  0.00           H  
ATOM   2871 2HG  ARG B  30      -1.549  13.639 -75.084  1.00  0.00           H  
ATOM   2872 1HD  ARG B  30       0.218  11.954 -75.193  1.00  0.00           H  
ATOM   2873 2HD  ARG B  30       0.482  12.367 -76.903  1.00  0.00           H  
ATOM   2874  HE  ARG B  30       0.633  14.708 -75.284  1.00  0.00           H  
ATOM   2875 1HH1 ARG B  30       2.418  11.795 -76.100  1.00  0.00           H  
ATOM   2876 2HH1 ARG B  30       3.981  12.510 -75.776  1.00  0.00           H  
ATOM   2877 1HH2 ARG B  30       2.668  15.626 -74.865  1.00  0.00           H  
ATOM   2878 2HH2 ARG B  30       4.123  14.679 -75.077  1.00  0.00           H  
ATOM   2879  N   ALA B  31      -4.782  10.399 -76.506  1.00  0.00           N  
ATOM   2880  CA  ALA B  31      -5.617   9.181 -76.928  1.00  0.00           C  
ATOM   2881  C   ALA B  31      -6.887   9.637 -77.728  1.00  0.00           C  
ATOM   2882  O   ALA B  31      -7.174   9.167 -78.830  1.00  0.00           O  
ATOM   2883  CB  ALA B  31      -5.846   8.311 -75.721  1.00  0.00           C  
ATOM   2884  H   ALA B  31      -4.537  10.514 -75.534  1.00  0.00           H  
ATOM   2885  HA  ALA B  31      -5.003   8.559 -77.579  1.00  0.00           H  
ATOM   2886 1HB  ALA B  31      -6.438   7.441 -76.006  1.00  0.00           H  
ATOM   2887 2HB  ALA B  31      -4.887   7.982 -75.322  1.00  0.00           H  
ATOM   2888 3HB  ALA B  31      -6.380   8.879 -74.960  1.00  0.00           H  
ATOM   2889  N   GLN B  32      -7.689  10.545 -77.093  1.00  0.00           N  
ATOM   2890  CA  GLN B  32      -8.910  11.129 -77.661  1.00  0.00           C  
ATOM   2891  C   GLN B  32      -8.664  12.016 -78.850  1.00  0.00           C  
ATOM   2892  O   GLN B  32      -9.234  11.835 -79.889  1.00  0.00           O  
ATOM   2893  CB  GLN B  32      -9.658  11.932 -76.593  1.00  0.00           C  
ATOM   2894  CG  GLN B  32     -10.250  11.086 -75.479  1.00  0.00           C  
ATOM   2895  CD  GLN B  32     -11.037  11.912 -74.480  1.00  0.00           C  
ATOM   2896  OE1 GLN B  32     -10.560  12.939 -73.989  1.00  0.00           O  
ATOM   2897  NE2 GLN B  32     -12.251  11.470 -74.174  1.00  0.00           N  
ATOM   2898  H   GLN B  32      -7.399  10.818 -76.165  1.00  0.00           H  
ATOM   2899  HA  GLN B  32      -9.553  10.320 -78.006  1.00  0.00           H  
ATOM   2900 1HB  GLN B  32      -8.981  12.657 -76.142  1.00  0.00           H  
ATOM   2901 2HB  GLN B  32     -10.470  12.490 -77.060  1.00  0.00           H  
ATOM   2902 1HG  GLN B  32     -10.921  10.346 -75.916  1.00  0.00           H  
ATOM   2903 2HG  GLN B  32      -9.440  10.587 -74.947  1.00  0.00           H  
ATOM   2904 1HE2 GLN B  32     -12.818  11.974 -73.521  1.00  0.00           H  
ATOM   2905 2HE2 GLN B  32     -12.600  10.633 -74.596  1.00  0.00           H  
ATOM   2906  N   VAL B  33      -7.541  12.788 -78.860  1.00  0.00           N  
ATOM   2907  CA  VAL B  33      -7.153  13.608 -80.061  1.00  0.00           C  
ATOM   2908  C   VAL B  33      -6.762  12.597 -81.239  1.00  0.00           C  
ATOM   2909  O   VAL B  33      -7.049  12.837 -82.390  1.00  0.00           O  
ATOM   2910  CB  VAL B  33      -5.970  14.538 -79.731  1.00  0.00           C  
ATOM   2911  CG1 VAL B  33      -5.440  15.195 -80.996  1.00  0.00           C  
ATOM   2912  CG2 VAL B  33      -6.403  15.588 -78.719  1.00  0.00           C  
ATOM   2913  H   VAL B  33      -6.954  12.810 -78.039  1.00  0.00           H  
ATOM   2914  HA  VAL B  33      -8.006  14.224 -80.350  1.00  0.00           H  
ATOM   2915  HB  VAL B  33      -5.158  13.943 -79.313  1.00  0.00           H  
ATOM   2916 1HG1 VAL B  33      -4.604  15.848 -80.745  1.00  0.00           H  
ATOM   2917 2HG1 VAL B  33      -5.102  14.427 -81.691  1.00  0.00           H  
ATOM   2918 3HG1 VAL B  33      -6.232  15.783 -81.460  1.00  0.00           H  
ATOM   2919 1HG2 VAL B  33      -5.562  16.241 -78.489  1.00  0.00           H  
ATOM   2920 2HG2 VAL B  33      -7.219  16.179 -79.134  1.00  0.00           H  
ATOM   2921 3HG2 VAL B  33      -6.739  15.096 -77.806  1.00  0.00           H  
ATOM   2922  N   SER B  34      -5.957  11.533 -80.945  1.00  0.00           N  
ATOM   2923  CA  SER B  34      -5.543  10.624 -82.010  1.00  0.00           C  
ATOM   2924  C   SER B  34      -6.685   9.831 -82.740  1.00  0.00           C  
ATOM   2925  O   SER B  34      -6.689   9.683 -84.009  1.00  0.00           O  
ATOM   2926  CB  SER B  34      -4.549   9.641 -81.421  1.00  0.00           C  
ATOM   2927  OG  SER B  34      -5.181   8.760 -80.534  1.00  0.00           O  
ATOM   2928  H   SER B  34      -5.640  11.362 -80.002  1.00  0.00           H  
ATOM   2929  HA  SER B  34      -5.065  11.208 -82.797  1.00  0.00           H  
ATOM   2930 1HB  SER B  34      -4.077   9.076 -82.225  1.00  0.00           H  
ATOM   2931 2HB  SER B  34      -3.764  10.186 -80.899  1.00  0.00           H  
ATOM   2932  HG  SER B  34      -5.868   9.270 -80.098  1.00  0.00           H  
ATOM   2933  N   GLU B  35      -7.689   9.560 -81.891  1.00  0.00           N  
ATOM   2934  CA  GLU B  35      -8.981   8.865 -82.339  1.00  0.00           C  
ATOM   2935  C   GLU B  35      -9.727   9.839 -83.213  1.00  0.00           C  
ATOM   2936  O   GLU B  35     -10.161   9.514 -84.337  1.00  0.00           O  
ATOM   2937  CB  GLU B  35      -9.868   8.448 -81.164  1.00  0.00           C  
ATOM   2938  CG  GLU B  35      -9.348   7.254 -80.377  1.00  0.00           C  
ATOM   2939  CD  GLU B  35     -10.152   6.975 -79.137  1.00  0.00           C  
ATOM   2940  OE1 GLU B  35     -10.190   7.819 -78.275  1.00  0.00           O  
ATOM   2941  OE2 GLU B  35     -10.729   5.916 -79.053  1.00  0.00           O  
ATOM   2942  H   GLU B  35      -7.583   9.825 -80.922  1.00  0.00           H  
ATOM   2943  HA  GLU B  35      -8.716   7.961 -82.887  1.00  0.00           H  
ATOM   2944 1HB  GLU B  35      -9.974   9.284 -80.472  1.00  0.00           H  
ATOM   2945 2HB  GLU B  35     -10.864   8.199 -81.530  1.00  0.00           H  
ATOM   2946 1HG  GLU B  35      -9.371   6.372 -81.017  1.00  0.00           H  
ATOM   2947 2HG  GLU B  35      -8.312   7.439 -80.098  1.00  0.00           H  
ATOM   2948  N   ALA B  36      -9.807  11.087 -82.860  1.00  0.00           N  
ATOM   2949  CA  ALA B  36     -10.413  12.184 -83.583  1.00  0.00           C  
ATOM   2950  C   ALA B  36      -9.728  12.440 -84.944  1.00  0.00           C  
ATOM   2951  O   ALA B  36     -10.423  12.534 -85.977  1.00  0.00           O  
ATOM   2952  CB  ALA B  36     -10.332  13.419 -82.707  1.00  0.00           C  
ATOM   2953  H   ALA B  36      -9.380  11.266 -81.963  1.00  0.00           H  
ATOM   2954  HA  ALA B  36     -11.449  11.919 -83.794  1.00  0.00           H  
ATOM   2955 1HB  ALA B  36     -10.782  14.265 -83.227  1.00  0.00           H  
ATOM   2956 2HB  ALA B  36     -10.868  13.240 -81.775  1.00  0.00           H  
ATOM   2957 3HB  ALA B  36      -9.289  13.642 -82.488  1.00  0.00           H  
ATOM   2958  N   ILE B  37      -8.353  12.387 -85.002  1.00  0.00           N  
ATOM   2959  CA  ILE B  37      -7.573  12.535 -86.164  1.00  0.00           C  
ATOM   2960  C   ILE B  37      -7.856  11.399 -87.163  1.00  0.00           C  
ATOM   2961  O   ILE B  37      -8.114  11.841 -88.260  1.00  0.00           O  
ATOM   2962  CB  ILE B  37      -6.079  12.571 -85.792  1.00  0.00           C  
ATOM   2963  CG1 ILE B  37      -5.745  13.866 -85.046  1.00  0.00           C  
ATOM   2964  CG2 ILE B  37      -5.218  12.434 -87.039  1.00  0.00           C  
ATOM   2965  CD1 ILE B  37      -4.380  13.861 -84.397  1.00  0.00           C  
ATOM   2966  H   ILE B  37      -7.893  12.227 -84.118  1.00  0.00           H  
ATOM   2967  HA  ILE B  37      -7.840  13.477 -86.642  1.00  0.00           H  
ATOM   2968  HB  ILE B  37      -5.853  11.749 -85.114  1.00  0.00           H  
ATOM   2969 1HG1 ILE B  37      -5.792  14.706 -85.737  1.00  0.00           H  
ATOM   2970 2HG1 ILE B  37      -6.490  14.040 -84.269  1.00  0.00           H  
ATOM   2971 1HG2 ILE B  37      -4.165  12.462 -86.758  1.00  0.00           H  
ATOM   2972 2HG2 ILE B  37      -5.437  11.488 -87.530  1.00  0.00           H  
ATOM   2973 3HG2 ILE B  37      -5.433  13.256 -87.722  1.00  0.00           H  
ATOM   2974 1HD1 ILE B  37      -4.216  14.811 -83.888  1.00  0.00           H  
ATOM   2975 2HD1 ILE B  37      -4.323  13.047 -83.674  1.00  0.00           H  
ATOM   2976 3HD1 ILE B  37      -3.615  13.724 -85.160  1.00  0.00           H  
ATOM   2977  N   LEU B  38      -7.906  10.161 -86.690  1.00  0.00           N  
ATOM   2978  CA  LEU B  38      -8.129   9.013 -87.552  1.00  0.00           C  
ATOM   2979  C   LEU B  38      -9.501   9.212 -88.241  1.00  0.00           C  
ATOM   2980  O   LEU B  38      -9.689   8.956 -89.474  1.00  0.00           O  
ATOM   2981  CB  LEU B  38      -8.103   7.709 -86.744  1.00  0.00           C  
ATOM   2982  CG  LEU B  38      -6.726   7.277 -86.224  1.00  0.00           C  
ATOM   2983  CD1 LEU B  38      -6.887   6.087 -85.288  1.00  0.00           C  
ATOM   2984  CD2 LEU B  38      -5.825   6.929 -87.401  1.00  0.00           C  
ATOM   2985  H   LEU B  38      -7.786  10.015 -85.698  1.00  0.00           H  
ATOM   2986  HA  LEU B  38      -7.331   8.976 -88.292  1.00  0.00           H  
ATOM   2987 1HB  LEU B  38      -8.761   7.820 -85.884  1.00  0.00           H  
ATOM   2988 2HB  LEU B  38      -8.488   6.905 -87.370  1.00  0.00           H  
ATOM   2989  HG  LEU B  38      -6.279   8.092 -85.654  1.00  0.00           H  
ATOM   2990 1HD1 LEU B  38      -5.908   5.779 -84.919  1.00  0.00           H  
ATOM   2991 2HD1 LEU B  38      -7.519   6.369 -84.446  1.00  0.00           H  
ATOM   2992 3HD1 LEU B  38      -7.347   5.259 -85.827  1.00  0.00           H  
ATOM   2993 1HD2 LEU B  38      -4.846   6.622 -87.031  1.00  0.00           H  
ATOM   2994 2HD2 LEU B  38      -6.270   6.113 -87.971  1.00  0.00           H  
ATOM   2995 3HD2 LEU B  38      -5.713   7.802 -88.043  1.00  0.00           H  
ATOM   2996  N   LEU B  39     -10.464   9.663 -87.467  1.00  0.00           N  
ATOM   2997  CA  LEU B  39     -11.851   9.890 -87.947  1.00  0.00           C  
ATOM   2998  C   LEU B  39     -11.910  11.011 -88.954  1.00  0.00           C  
ATOM   2999  O   LEU B  39     -12.468  10.913 -90.004  1.00  0.00           O  
ATOM   3000  CB  LEU B  39     -12.785  10.221 -86.776  1.00  0.00           C  
ATOM   3001  CG  LEU B  39     -13.070   9.067 -85.806  1.00  0.00           C  
ATOM   3002  CD1 LEU B  39     -13.813   9.599 -84.588  1.00  0.00           C  
ATOM   3003  CD2 LEU B  39     -13.882   7.994 -86.516  1.00  0.00           C  
ATOM   3004  H   LEU B  39     -10.239   9.861 -86.502  1.00  0.00           H  
ATOM   3005  HA  LEU B  39     -12.205   8.977 -88.424  1.00  0.00           H  
ATOM   3006 1HB  LEU B  39     -12.347  11.036 -86.202  1.00  0.00           H  
ATOM   3007 2HB  LEU B  39     -13.740  10.559 -87.178  1.00  0.00           H  
ATOM   3008  HG  LEU B  39     -12.127   8.640 -85.461  1.00  0.00           H  
ATOM   3009 1HD1 LEU B  39     -14.015   8.779 -83.898  1.00  0.00           H  
ATOM   3010 2HD1 LEU B  39     -13.201  10.350 -84.088  1.00  0.00           H  
ATOM   3011 3HD1 LEU B  39     -14.754  10.048 -84.903  1.00  0.00           H  
ATOM   3012 1HD2 LEU B  39     -14.083   7.174 -85.827  1.00  0.00           H  
ATOM   3013 2HD2 LEU B  39     -14.825   8.420 -86.860  1.00  0.00           H  
ATOM   3014 3HD2 LEU B  39     -13.320   7.620 -87.372  1.00  0.00           H  
ATOM   3015  N   ALA B  40     -11.128  12.102 -88.721  1.00  0.00           N  
ATOM   3016  CA  ALA B  40     -11.063  13.251 -89.613  1.00  0.00           C  
ATOM   3017  C   ALA B  40     -10.085  13.143 -90.846  1.00  0.00           C  
ATOM   3018  O   ALA B  40     -10.292  13.670 -91.901  1.00  0.00           O  
ATOM   3019  CB  ALA B  40     -10.595  14.446 -88.750  1.00  0.00           C  
ATOM   3020  H   ALA B  40     -10.568  12.100 -87.880  1.00  0.00           H  
ATOM   3021  HA  ALA B  40     -12.046  13.384 -90.066  1.00  0.00           H  
ATOM   3022 1HB  ALA B  40     -10.528  15.339 -89.371  1.00  0.00           H  
ATOM   3023 2HB  ALA B  40     -11.309  14.616 -87.945  1.00  0.00           H  
ATOM   3024 3HB  ALA B  40      -9.616  14.226 -88.326  1.00  0.00           H  
ATOM   3025  N   GLU B  41      -9.147  12.216 -90.715  1.00  0.00           N  
ATOM   3026  CA  GLU B  41      -8.090  11.914 -91.625  1.00  0.00           C  
ATOM   3027  C   GLU B  41      -8.564  11.708 -93.086  1.00  0.00           C  
ATOM   3028  O   GLU B  41      -7.791  11.926 -94.011  1.00  0.00           O  
ATOM   3029  CB  GLU B  41      -7.355  10.667 -91.129  1.00  0.00           C  
ATOM   3030  CG  GLU B  41      -6.093  10.329 -91.911  1.00  0.00           C  
ATOM   3031  CD  GLU B  41      -5.370   9.130 -91.363  1.00  0.00           C  
ATOM   3032  OE1 GLU B  41      -5.876   8.519 -90.453  1.00  0.00           O  
ATOM   3033  OE2 GLU B  41      -4.309   8.824 -91.856  1.00  0.00           O  
ATOM   3034  H   GLU B  41      -9.225  11.686 -89.859  1.00  0.00           H  
ATOM   3035  HA  GLU B  41      -7.400  12.758 -91.647  1.00  0.00           H  
ATOM   3036 1HB  GLU B  41      -7.075  10.801 -90.084  1.00  0.00           H  
ATOM   3037 2HB  GLU B  41      -8.022   9.806 -91.182  1.00  0.00           H  
ATOM   3038 1HG  GLU B  41      -6.362  10.134 -92.948  1.00  0.00           H  
ATOM   3039 2HG  GLU B  41      -5.426  11.189 -91.893  1.00  0.00           H  
ATOM   3040  N   GLY B  42      -9.752  11.120 -93.433  1.00  0.00           N  
ATOM   3041  CA  GLY B  42     -10.145  10.922 -94.876  1.00  0.00           C  
ATOM   3042  C   GLY B  42     -10.076  12.142 -95.728  1.00  0.00           C  
ATOM   3043  O   GLY B  42      -9.842  11.922 -96.907  1.00  0.00           O  
ATOM   3044  H   GLY B  42     -10.380  10.812 -92.705  1.00  0.00           H  
ATOM   3045 1HA  GLY B  42      -9.501  10.168 -95.329  1.00  0.00           H  
ATOM   3046 2HA  GLY B  42     -11.166  10.544 -94.926  1.00  0.00           H  
ATOM   3047  N   GLN B  43     -10.047  13.374 -95.135  1.00  0.00           N  
ATOM   3048  CA  GLN B  43      -9.985  14.614 -95.933  1.00  0.00           C  
ATOM   3049  C   GLN B  43      -8.626  14.744 -96.704  1.00  0.00           C  
ATOM   3050  O   GLN B  43      -8.498  15.665 -97.484  1.00  0.00           O  
ATOM   3051  CB  GLN B  43     -10.196  15.830 -95.027  1.00  0.00           C  
ATOM   3052  CG  GLN B  43     -11.574  15.901 -94.392  1.00  0.00           C  
ATOM   3053  CD  GLN B  43     -12.687  15.900 -95.423  1.00  0.00           C  
ATOM   3054  OE1 GLN B  43     -12.670  15.114 -96.374  1.00  0.00           O  
ATOM   3055  NE2 GLN B  43     -13.662  16.783 -95.241  1.00  0.00           N  
ATOM   3056  H   GLN B  43     -10.068  13.438 -94.127  1.00  0.00           H  
ATOM   3057  HA  GLN B  43     -10.781  14.587 -96.678  1.00  0.00           H  
ATOM   3058 1HB  GLN B  43      -9.457  15.819 -94.225  1.00  0.00           H  
ATOM   3059 2HB  GLN B  43     -10.042  16.743 -95.601  1.00  0.00           H  
ATOM   3060 1HG  GLN B  43     -11.709  15.037 -93.743  1.00  0.00           H  
ATOM   3061 2HG  GLN B  43     -11.648  16.821 -93.811  1.00  0.00           H  
ATOM   3062 1HE2 GLN B  43     -14.424  16.829 -95.889  1.00  0.00           H  
ATOM   3063 2HE2 GLN B  43     -13.637  17.402 -94.456  1.00  0.00           H  
ATOM   3064  N   LYS B  44      -7.633  14.002 -96.333  1.00  0.00           N  
ATOM   3065  CA  LYS B  44      -6.310  13.868 -97.009  1.00  0.00           C  
ATOM   3066  C   LYS B  44      -6.483  13.357 -98.444  1.00  0.00           C  
ATOM   3067  O   LYS B  44      -5.506  13.506 -99.268  1.00  0.00           O  
ATOM   3068  CB  LYS B  44      -5.389  12.927 -96.230  1.00  0.00           C  
ATOM   3069  CG  LYS B  44      -4.769  13.543 -94.983  1.00  0.00           C  
ATOM   3070  CD  LYS B  44      -4.334  12.472 -93.995  1.00  0.00           C  
ATOM   3071  CE  LYS B  44      -3.197  11.630 -94.555  1.00  0.00           C  
ATOM   3072  NZ  LYS B  44      -2.641  10.698 -93.537  1.00  0.00           N  
ATOM   3073  H   LYS B  44      -7.811  13.472 -95.491  1.00  0.00           H  
ATOM   3074  HA  LYS B  44      -5.841  14.852 -97.050  1.00  0.00           H  
ATOM   3075 1HB  LYS B  44      -5.948  12.042 -95.924  1.00  0.00           H  
ATOM   3076 2HB  LYS B  44      -4.577  12.594 -96.877  1.00  0.00           H  
ATOM   3077 1HG  LYS B  44      -3.901  14.140 -95.265  1.00  0.00           H  
ATOM   3078 2HG  LYS B  44      -5.495  14.197 -94.501  1.00  0.00           H  
ATOM   3079 1HD  LYS B  44      -4.004  12.943 -93.068  1.00  0.00           H  
ATOM   3080 2HD  LYS B  44      -5.178  11.820 -93.770  1.00  0.00           H  
ATOM   3081 1HE  LYS B  44      -3.558  11.050 -95.403  1.00  0.00           H  
ATOM   3082 2HE  LYS B  44      -2.398  12.284 -94.905  1.00  0.00           H  
ATOM   3083 1HZ  LYS B  44      -1.891  10.159 -93.947  1.00  0.00           H  
ATOM   3084 2HZ  LYS B  44      -2.285  11.227 -92.753  1.00  0.00           H  
ATOM   3085 3HZ  LYS B  44      -3.368  10.073 -93.219  1.00  0.00           H  
ATOM   3086  N   SER B  45      -7.597  12.691 -98.761  1.00  0.00           N  
ATOM   3087  CA  SER B  45      -7.927  12.350-100.134  1.00  0.00           C  
ATOM   3088  C   SER B  45      -7.850  13.635-100.931  1.00  0.00           C  
ATOM   3089  O   SER B  45      -7.048  13.694-101.892  1.00  0.00           O  
ATOM   3090  CB  SER B  45      -9.308  11.733-100.236  1.00  0.00           C  
ATOM   3091  OG  SER B  45      -9.662  11.511-101.574  1.00  0.00           O  
ATOM   3092  H   SER B  45      -8.227  12.417 -98.021  1.00  0.00           H  
ATOM   3093  HA  SER B  45      -7.201  11.620-100.494  1.00  0.00           H  
ATOM   3094 1HB  SER B  45      -9.326  10.789 -99.691  1.00  0.00           H  
ATOM   3095 2HB  SER B  45     -10.037  12.394 -99.769  1.00  0.00           H  
ATOM   3096  HG  SER B  45      -8.899  11.097-101.984  1.00  0.00           H  
ATOM   3097  N   ALA B  46      -8.535  14.720-100.509  1.00  0.00           N  
ATOM   3098  CA  ALA B  46      -8.404  16.004-101.221  1.00  0.00           C  
ATOM   3099  C   ALA B  46      -7.055  16.645-101.338  1.00  0.00           C  
ATOM   3100  O   ALA B  46      -6.687  16.936-102.438  1.00  0.00           O  
ATOM   3101  CB  ALA B  46      -9.349  16.945-100.477  1.00  0.00           C  
ATOM   3102  H   ALA B  46      -9.143  14.664 -99.704  1.00  0.00           H  
ATOM   3103  HA  ALA B  46      -8.694  15.847-102.259  1.00  0.00           H  
ATOM   3104 1HB  ALA B  46      -9.318  17.932-100.938  1.00  0.00           H  
ATOM   3105 2HB  ALA B  46     -10.365  16.553-100.526  1.00  0.00           H  
ATOM   3106 3HB  ALA B  46      -9.040  17.022 -99.435  1.00  0.00           H  
ATOM   3107  N   VAL B  47      -6.268  16.628-100.222  1.00  0.00           N  
ATOM   3108  CA  VAL B  47      -4.888  17.205-100.110  1.00  0.00           C  
ATOM   3109  C   VAL B  47      -4.010  16.552-101.182  1.00  0.00           C  
ATOM   3110  O   VAL B  47      -3.190  17.244-101.714  1.00  0.00           O  
ATOM   3111  CB  VAL B  47      -4.280  16.952 -98.718  1.00  0.00           C  
ATOM   3112  CG1 VAL B  47      -2.804  17.322 -98.708  1.00  0.00           C  
ATOM   3113  CG2 VAL B  47      -5.042  17.746 -97.668  1.00  0.00           C  
ATOM   3114  H   VAL B  47      -6.681  16.180 -99.417  1.00  0.00           H  
ATOM   3115  HA  VAL B  47      -4.950  18.283-100.263  1.00  0.00           H  
ATOM   3116  HB  VAL B  47      -4.347  15.889 -98.490  1.00  0.00           H  
ATOM   3117 1HG1 VAL B  47      -2.389  17.137 -97.716  1.00  0.00           H  
ATOM   3118 2HG1 VAL B  47      -2.272  16.716 -99.441  1.00  0.00           H  
ATOM   3119 3HG1 VAL B  47      -2.691  18.377 -98.956  1.00  0.00           H  
ATOM   3120 1HG2 VAL B  47      -4.606  17.563 -96.687  1.00  0.00           H  
ATOM   3121 2HG2 VAL B  47      -4.980  18.810 -97.900  1.00  0.00           H  
ATOM   3122 3HG2 VAL B  47      -6.087  17.436 -97.665  1.00  0.00           H  
ATOM   3123  N   THR B  48      -4.028  15.214-101.340  1.00  0.00           N  
ATOM   3124  CA  THR B  48      -3.244  14.546-102.342  1.00  0.00           C  
ATOM   3125  C   THR B  48      -3.875  14.460-103.769  1.00  0.00           C  
ATOM   3126  O   THR B  48      -3.204  14.725-104.780  1.00  0.00           O  
ATOM   3127  CB  THR B  48      -2.915  13.126-101.845  1.00  0.00           C  
ATOM   3128  OG1 THR B  48      -2.229  13.204-100.589  1.00  0.00           O  
ATOM   3129  CG2 THR B  48      -2.040  12.397-102.852  1.00  0.00           C  
ATOM   3130  H   THR B  48      -4.616  14.666-100.728  1.00  0.00           H  
ATOM   3131  HA  THR B  48      -2.319  15.104-102.487  1.00  0.00           H  
ATOM   3132  HB  THR B  48      -3.840  12.567-101.703  1.00  0.00           H  
ATOM   3133  HG1 THR B  48      -2.847  13.031 -99.875  1.00  0.00           H  
ATOM   3134 1HG2 THR B  48      -1.818  11.395-102.484  1.00  0.00           H  
ATOM   3135 2HG2 THR B  48      -2.565  12.325-103.805  1.00  0.00           H  
ATOM   3136 3HG2 THR B  48      -1.110  12.946-102.991  1.00  0.00           H  
ATOM   3137  N   GLU B  49      -5.133  14.100-103.823  1.00  0.00           N  
ATOM   3138  CA  GLU B  49      -5.854  13.981-105.096  1.00  0.00           C  
ATOM   3139  C   GLU B  49      -5.941  15.178-106.012  1.00  0.00           C  
ATOM   3140  O   GLU B  49      -5.503  15.233-107.138  1.00  0.00           O  
ATOM   3141  CB  GLU B  49      -7.285  13.526-104.801  1.00  0.00           C  
ATOM   3142  CG  GLU B  49      -8.182  13.439-106.027  1.00  0.00           C  
ATOM   3143  CD  GLU B  49      -7.959  12.187-106.829  1.00  0.00           C  
ATOM   3144  OE1 GLU B  49      -7.858  11.138-106.240  1.00  0.00           O  
ATOM   3145  OE2 GLU B  49      -7.889  12.280-108.032  1.00  0.00           O  
ATOM   3146  H   GLU B  49      -5.620  13.898-102.961  1.00  0.00           H  
ATOM   3147  HA  GLU B  49      -5.351  13.233-105.710  1.00  0.00           H  
ATOM   3148 1HB  GLU B  49      -7.264  12.542-104.332  1.00  0.00           H  
ATOM   3149 2HB  GLU B  49      -7.748  14.215-104.095  1.00  0.00           H  
ATOM   3150 1HG  GLU B  49      -9.223  13.470-105.706  1.00  0.00           H  
ATOM   3151 2HG  GLU B  49      -8.000  14.307-106.660  1.00  0.00           H  
ATOM   3152  N   TYR B  50      -6.486  16.221-105.352  1.00  0.00           N  
ATOM   3153  CA  TYR B  50      -6.717  17.473-106.042  1.00  0.00           C  
ATOM   3154  C   TYR B  50      -5.329  18.046-106.293  1.00  0.00           C  
ATOM   3155  O   TYR B  50      -5.114  18.332-107.414  1.00  0.00           O  
ATOM   3156  CB  TYR B  50      -7.591  18.427-105.225  1.00  0.00           C  
ATOM   3157  CG  TYR B  50      -7.951  19.702-105.956  1.00  0.00           C  
ATOM   3158  CD1 TYR B  50      -8.994  19.706-106.871  1.00  0.00           C  
ATOM   3159  CD2 TYR B  50      -7.238  20.866-105.712  1.00  0.00           C  
ATOM   3160  CE1 TYR B  50      -9.322  20.870-107.538  1.00  0.00           C  
ATOM   3161  CE2 TYR B  50      -7.566  22.030-106.380  1.00  0.00           C  
ATOM   3162  CZ  TYR B  50      -8.603  22.034-107.289  1.00  0.00           C  
ATOM   3163  OH  TYR B  50      -8.930  23.194-107.954  1.00  0.00           O  
ATOM   3164  H   TYR B  50      -6.737  16.143-104.377  1.00  0.00           H  
ATOM   3165  HA  TYR B  50      -7.235  17.262-106.977  1.00  0.00           H  
ATOM   3166 1HB  TYR B  50      -8.517  17.923-104.945  1.00  0.00           H  
ATOM   3167 2HB  TYR B  50      -7.075  18.697-104.305  1.00  0.00           H  
ATOM   3168  HD1 TYR B  50      -9.555  18.791-107.063  1.00  0.00           H  
ATOM   3169  HD2 TYR B  50      -6.417  20.862-104.994  1.00  0.00           H  
ATOM   3170  HE1 TYR B  50     -10.141  20.874-108.257  1.00  0.00           H  
ATOM   3171  HE2 TYR B  50      -7.005  22.945-106.188  1.00  0.00           H  
ATOM   3172  HH  TYR B  50      -8.143  23.733-108.061  1.00  0.00           H  
ATOM   3173  N   TYR B  51      -4.405  18.063-105.353  1.00  0.00           N  
ATOM   3174  CA  TYR B  51      -3.123  18.689-105.563  1.00  0.00           C  
ATOM   3175  C   TYR B  51      -2.340  18.138-106.701  1.00  0.00           C  
ATOM   3176  O   TYR B  51      -2.092  18.856-107.699  1.00  0.00           O  
ATOM   3177  CB  TYR B  51      -2.285  18.593-104.286  1.00  0.00           C  
ATOM   3178  CG  TYR B  51      -0.893  19.168-104.426  1.00  0.00           C  
ATOM   3179  CD1 TYR B  51      -0.715  20.540-104.526  1.00  0.00           C  
ATOM   3180  CD2 TYR B  51       0.207  18.322-104.453  1.00  0.00           C  
ATOM   3181  CE1 TYR B  51       0.557  21.064-104.653  1.00  0.00           C  
ATOM   3182  CE2 TYR B  51       1.478  18.847-104.580  1.00  0.00           C  
ATOM   3183  CZ  TYR B  51       1.655  20.212-104.680  1.00  0.00           C  
ATOM   3184  OH  TYR B  51       2.921  20.734-104.807  1.00  0.00           O  
ATOM   3185  H   TYR B  51      -4.599  17.626-104.463  1.00  0.00           H  
ATOM   3186  HA  TYR B  51      -3.287  19.740-105.802  1.00  0.00           H  
ATOM   3187 1HB  TYR B  51      -2.792  19.122-103.477  1.00  0.00           H  
ATOM   3188 2HB  TYR B  51      -2.194  17.549-103.988  1.00  0.00           H  
ATOM   3189  HD1 TYR B  51      -1.579  21.204-104.504  1.00  0.00           H  
ATOM   3190  HD2 TYR B  51       0.067  17.244-104.375  1.00  0.00           H  
ATOM   3191  HE1 TYR B  51       0.696  22.142-104.732  1.00  0.00           H  
ATOM   3192  HE2 TYR B  51       2.342  18.182-104.602  1.00  0.00           H  
ATOM   3193  HH  TYR B  51       3.561  20.019-104.827  1.00  0.00           H  
ATOM   3194  N   LEU B  52      -2.156  16.773-106.725  1.00  0.00           N  
ATOM   3195  CA  LEU B  52      -1.297  16.140-107.714  1.00  0.00           C  
ATOM   3196  C   LEU B  52      -1.940  16.050-109.093  1.00  0.00           C  
ATOM   3197  O   LEU B  52      -1.129  16.117-110.006  1.00  0.00           O  
ATOM   3198  CB  LEU B  52      -0.916  14.732-107.240  1.00  0.00           C  
ATOM   3199  CG  LEU B  52      -0.002  14.669-106.010  1.00  0.00           C  
ATOM   3200  CD1 LEU B  52       0.179  13.218-105.585  1.00  0.00           C  
ATOM   3201  CD2 LEU B  52       1.337  15.314-106.339  1.00  0.00           C  
ATOM   3202  H   LEU B  52      -2.626  16.197-106.041  1.00  0.00           H  
ATOM   3203  HA  LEU B  52      -0.392  16.737-107.819  1.00  0.00           H  
ATOM   3204 1HB  LEU B  52      -1.828  14.186-107.003  1.00  0.00           H  
ATOM   3205 2HB  LEU B  52      -0.410  14.216-108.056  1.00  0.00           H  
ATOM   3206  HG  LEU B  52      -0.468  15.203-105.182  1.00  0.00           H  
ATOM   3207 1HD1 LEU B  52       0.829  13.174-104.710  1.00  0.00           H  
ATOM   3208 2HD1 LEU B  52      -0.791  12.788-105.337  1.00  0.00           H  
ATOM   3209 3HD1 LEU B  52       0.630  12.654-106.400  1.00  0.00           H  
ATOM   3210 1HD2 LEU B  52       1.986  15.270-105.464  1.00  0.00           H  
ATOM   3211 2HD2 LEU B  52       1.805  14.779-107.166  1.00  0.00           H  
ATOM   3212 3HD2 LEU B  52       1.180  16.354-106.622  1.00  0.00           H  
ATOM   3213  N   ASN B  53      -3.247  15.994-109.187  1.00  0.00           N  
ATOM   3214  CA  ASN B  53      -3.931  15.779-110.502  1.00  0.00           C  
ATOM   3215  C   ASN B  53      -4.368  17.113-111.148  1.00  0.00           C  
ATOM   3216  O   ASN B  53      -4.454  17.286-112.371  1.00  0.00           O  
ATOM   3217  CB  ASN B  53      -5.129  14.861-110.339  1.00  0.00           C  
ATOM   3218  CG  ASN B  53      -4.733  13.444-110.033  1.00  0.00           C  
ATOM   3219  OD1 ASN B  53      -3.677  12.973-110.470  1.00  0.00           O  
ATOM   3220  ND2 ASN B  53      -5.560  12.754-109.289  1.00  0.00           N  
ATOM   3221  H   ASN B  53      -3.806  16.098-108.352  1.00  0.00           H  
ATOM   3222  HA  ASN B  53      -3.225  15.309-111.188  1.00  0.00           H  
ATOM   3223 1HB  ASN B  53      -5.765  15.231-109.534  1.00  0.00           H  
ATOM   3224 2HB  ASN B  53      -5.722  14.871-111.254  1.00  0.00           H  
ATOM   3225 1HD2 ASN B  53      -5.348  11.806-109.053  1.00  0.00           H  
ATOM   3226 2HD2 ASN B  53      -6.403  13.176-108.957  1.00  0.00           H  
ATOM   3227  N   HIS B  54      -4.440  18.193-110.297  1.00  0.00           N  
ATOM   3228  CA  HIS B  54      -4.875  19.509-110.758  1.00  0.00           C  
ATOM   3229  C   HIS B  54      -3.751  20.514-110.667  1.00  0.00           C  
ATOM   3230  O   HIS B  54      -3.879  21.720-111.019  1.00  0.00           O  
ATOM   3231  CB  HIS B  54      -6.074  20.007-109.945  1.00  0.00           C  
ATOM   3232  CG  HIS B  54      -7.305  19.173-110.116  1.00  0.00           C  
ATOM   3233  ND1 HIS B  54      -7.495  17.980-109.449  1.00  0.00           N  
ATOM   3234  CD2 HIS B  54      -8.409  19.358-110.878  1.00  0.00           C  
ATOM   3235  CE1 HIS B  54      -8.664  17.468-109.794  1.00  0.00           C  
ATOM   3236  NE2 HIS B  54      -9.237  18.285-110.659  1.00  0.00           N  
ATOM   3237  H   HIS B  54      -4.185  18.071-109.327  1.00  0.00           H  
ATOM   3238  HA  HIS B  54      -5.182  19.445-111.802  1.00  0.00           H  
ATOM   3239 1HB  HIS B  54      -5.815  20.019-108.885  1.00  0.00           H  
ATOM   3240 2HB  HIS B  54      -6.311  21.030-110.235  1.00  0.00           H  
ATOM   3241  HD2 HIS B  54      -8.604  20.201-111.541  1.00  0.00           H  
ATOM   3242  HE1 HIS B  54      -9.083  16.532-109.426  1.00  0.00           H  
ATOM   3243  HE2 HIS B  54     -10.139  18.147-111.093  1.00  0.00           H  
ATOM   3244  N   GLY B  55      -2.589  20.233-109.987  1.00  0.00           N  
ATOM   3245  CA  GLY B  55      -1.477  21.143-109.852  1.00  0.00           C  
ATOM   3246  C   GLY B  55      -1.617  22.286-108.884  1.00  0.00           C  
ATOM   3247  O   GLY B  55      -0.856  23.283-109.023  1.00  0.00           O  
ATOM   3248  H   GLY B  55      -2.531  19.320-109.561  1.00  0.00           H  
ATOM   3249 1HA  GLY B  55      -0.590  20.590-109.542  1.00  0.00           H  
ATOM   3250 2HA  GLY B  55      -1.254  21.591-110.820  1.00  0.00           H  
ATOM   3251  N   GLU B  56      -2.411  22.145-107.851  1.00  0.00           N  
ATOM   3252  CA  GLU B  56      -2.731  23.220-106.810  1.00  0.00           C  
ATOM   3253  C   GLU B  56      -3.564  22.677-105.568  1.00  0.00           C  
ATOM   3254  O   GLU B  56      -4.237  21.637-105.686  1.00  0.00           O  
ATOM   3255  CB  GLU B  56      -3.502  24.366-107.469  1.00  0.00           C  
ATOM   3256  CG  GLU B  56      -4.878  23.979-107.993  1.00  0.00           C  
ATOM   3257  CD  GLU B  56      -5.650  25.151-108.531  1.00  0.00           C  
ATOM   3258  OE1 GLU B  56      -5.038  26.135-108.872  1.00  0.00           O  
ATOM   3259  OE2 GLU B  56      -6.853  25.062-108.602  1.00  0.00           O  
ATOM   3260  H   GLU B  56      -2.834  21.232-107.762  1.00  0.00           H  
ATOM   3261  HA  GLU B  56      -1.793  23.606-106.412  1.00  0.00           H  
ATOM   3262 1HB  GLU B  56      -3.634  25.176-106.751  1.00  0.00           H  
ATOM   3263 2HB  GLU B  56      -2.925  24.760-108.305  1.00  0.00           H  
ATOM   3264 1HG  GLU B  56      -4.759  23.242-108.787  1.00  0.00           H  
ATOM   3265 2HG  GLU B  56      -5.445  23.515-107.187  1.00  0.00           H  
ATOM   3266  N   TRP B  57      -3.307  23.326-104.436  1.00  0.00           N  
ATOM   3267  CA  TRP B  57      -3.910  22.877-103.227  1.00  0.00           C  
ATOM   3268  C   TRP B  57      -5.485  23.009-103.212  1.00  0.00           C  
ATOM   3269  O   TRP B  57      -6.001  23.941-103.781  1.00  0.00           O  
ATOM   3270  CB  TRP B  57      -3.299  23.665-102.066  1.00  0.00           C  
ATOM   3271  CG  TRP B  57      -1.840  23.388-101.858  1.00  0.00           C  
ATOM   3272  CD1 TRP B  57      -0.811  24.263-102.040  1.00  0.00           C  
ATOM   3273  CD2 TRP B  57      -1.238  22.145-101.423  1.00  0.00           C  
ATOM   3274  NE1 TRP B  57       0.385  23.652-101.752  1.00  0.00           N  
ATOM   3275  CE2 TRP B  57       0.142  22.357-101.371  1.00  0.00           C  
ATOM   3276  CE3 TRP B  57      -1.753  20.889-101.078  1.00  0.00           C  
ATOM   3277  CZ2 TRP B  57       1.023  21.358-100.989  1.00  0.00           C  
ATOM   3278  CZ3 TRP B  57      -0.869  19.888-100.694  1.00  0.00           C  
ATOM   3279  CH2 TRP B  57       0.483  20.117-100.650  1.00  0.00           C  
ATOM   3280  H   TRP B  57      -2.695  24.128-104.413  1.00  0.00           H  
ATOM   3281  HA  TRP B  57      -3.693  21.816-103.105  1.00  0.00           H  
ATOM   3282 1HB  TRP B  57      -3.423  24.733-102.246  1.00  0.00           H  
ATOM   3283 2HB  TRP B  57      -3.828  23.424-101.144  1.00  0.00           H  
ATOM   3284  HD1 TRP B  57      -0.921  25.295-102.367  1.00  0.00           H  
ATOM   3285  HE1 TRP B  57       1.295  24.085-101.811  1.00  0.00           H  
ATOM   3286  HE3 TRP B  57      -2.826  20.703-101.108  1.00  0.00           H  
ATOM   3287  HZ2 TRP B  57       2.101  21.520-100.948  1.00  0.00           H  
ATOM   3288  HZ3 TRP B  57      -1.278  18.912-100.428  1.00  0.00           H  
ATOM   3289  HH2 TRP B  57       1.148  19.309-100.344  1.00  0.00           H  
ATOM   3290  N   PRO B  58      -6.268  22.117-102.629  1.00  0.00           N  
ATOM   3291  CA  PRO B  58      -7.694  22.161-102.582  1.00  0.00           C  
ATOM   3292  C   PRO B  58      -8.245  23.276-101.767  1.00  0.00           C  
ATOM   3293  O   PRO B  58      -8.036  23.290-100.549  1.00  0.00           O  
ATOM   3294  CB  PRO B  58      -8.039  20.803-101.961  1.00  0.00           C  
ATOM   3295  CG  PRO B  58      -6.826  20.441-101.176  1.00  0.00           C  
ATOM   3296  CD  PRO B  58      -5.678  20.959-102.001  1.00  0.00           C  
ATOM   3297  HA  PRO B  58      -8.087  22.244-103.606  1.00  0.00           H  
ATOM   3298 1HB  PRO B  58      -8.940  20.894-101.337  1.00  0.00           H  
ATOM   3299 2HB  PRO B  58      -8.269  20.075-102.753  1.00  0.00           H  
ATOM   3300 1HG  PRO B  58      -6.869  20.898-100.177  1.00  0.00           H  
ATOM   3301 2HG  PRO B  58      -6.782  19.352-101.026  1.00  0.00           H  
ATOM   3302 1HD  PRO B  58      -4.841  21.228-101.338  1.00  0.00           H  
ATOM   3303 2HD  PRO B  58      -5.368  20.190-102.724  1.00  0.00           H  
ATOM   3304  N   GLY B  59      -8.965  24.208-102.356  1.00  0.00           N  
ATOM   3305  CA  GLY B  59      -9.547  25.360-101.707  1.00  0.00           C  
ATOM   3306  C   GLY B  59     -10.554  25.103-100.618  1.00  0.00           C  
ATOM   3307  O   GLY B  59     -10.531  25.726 -99.555  1.00  0.00           O  
ATOM   3308  H   GLY B  59      -9.105  24.079-103.348  1.00  0.00           H  
ATOM   3309 1HA  GLY B  59      -8.757  25.965-101.260  1.00  0.00           H  
ATOM   3310 2HA  GLY B  59     -10.046  25.982-102.449  1.00  0.00           H  
ATOM   3311  N   ASP B  60     -11.535  24.265-100.893  1.00  0.00           N  
ATOM   3312  CA  ASP B  60     -12.595  23.785 -99.928  1.00  0.00           C  
ATOM   3313  C   ASP B  60     -13.053  22.379-100.365  1.00  0.00           C  
ATOM   3314  O   ASP B  60     -12.509  21.853-101.351  1.00  0.00           O  
ATOM   3315  CB  ASP B  60     -13.795  24.733 -99.885  1.00  0.00           C  
ATOM   3316  CG  ASP B  60     -14.506  24.851-101.226  1.00  0.00           C  
ATOM   3317  OD1 ASP B  60     -14.316  23.993-102.055  1.00  0.00           O  
ATOM   3318  OD2 ASP B  60     -15.233  25.799-101.409  1.00  0.00           O  
ATOM   3319  H   ASP B  60     -11.551  23.931-101.847  1.00  0.00           H  
ATOM   3320  HA  ASP B  60     -12.160  23.746 -98.929  1.00  0.00           H  
ATOM   3321 1HB  ASP B  60     -14.511  24.381 -99.141  1.00  0.00           H  
ATOM   3322 2HB  ASP B  60     -13.464  25.726 -99.577  1.00  0.00           H  
ATOM   3323  N   ASN B  61     -13.944  21.765 -99.601  1.00  0.00           N  
ATOM   3324  CA  ASN B  61     -14.364  20.407 -99.920  1.00  0.00           C  
ATOM   3325  C   ASN B  61     -15.180  20.218-101.197  1.00  0.00           C  
ATOM   3326  O   ASN B  61     -15.213  19.147-101.873  1.00  0.00           O  
ATOM   3327  CB  ASN B  61     -15.141  19.845 -98.744  1.00  0.00           C  
ATOM   3328  CG  ASN B  61     -14.261  19.537 -97.565  1.00  0.00           C  
ATOM   3329  OD1 ASN B  61     -13.119  19.092 -97.726  1.00  0.00           O  
ATOM   3330  ND2 ASN B  61     -14.770  19.764 -96.381  1.00  0.00           N  
ATOM   3331  H   ASN B  61     -14.340  22.226 -98.795  1.00  0.00           H  
ATOM   3332  HA  ASN B  61     -13.474  19.800-100.091  1.00  0.00           H  
ATOM   3333 1HB  ASN B  61     -15.904  20.562 -98.436  1.00  0.00           H  
ATOM   3334 2HB  ASN B  61     -15.653  18.933 -99.048  1.00  0.00           H  
ATOM   3335 1HD2 ASN B  61     -14.230  19.578 -95.560  1.00  0.00           H  
ATOM   3336 2HD2 ASN B  61     -15.698  20.125 -96.297  1.00  0.00           H  
ATOM   3337  N   SER B  62     -15.937  21.281-101.478  1.00  0.00           N  
ATOM   3338  CA  SER B  62     -16.756  21.336-102.792  1.00  0.00           C  
ATOM   3339  C   SER B  62     -15.821  21.377-104.068  1.00  0.00           C  
ATOM   3340  O   SER B  62     -16.012  20.604-105.023  1.00  0.00           O  
ATOM   3341  CB  SER B  62     -17.662  22.552-102.799  1.00  0.00           C  
ATOM   3342  OG  SER B  62     -18.402  22.620-103.987  1.00  0.00           O  
ATOM   3343  H   SER B  62     -15.983  22.059-100.837  1.00  0.00           H  
ATOM   3344  HA  SER B  62     -17.375  20.440-102.852  1.00  0.00           H  
ATOM   3345 1HB  SER B  62     -18.341  22.506-101.948  1.00  0.00           H  
ATOM   3346 2HB  SER B  62     -17.062  23.454-102.690  1.00  0.00           H  
ATOM   3347  HG  SER B  62     -17.949  23.257-104.545  1.00  0.00           H  
ATOM   3348  N   SER B  63     -14.812  22.250-104.079  1.00  0.00           N  
ATOM   3349  CA  SER B  63     -13.823  22.317-105.149  1.00  0.00           C  
ATOM   3350  C   SER B  63     -12.922  21.125-105.316  1.00  0.00           C  
ATOM   3351  O   SER B  63     -12.664  20.680-106.446  1.00  0.00           O  
ATOM   3352  CB  SER B  63     -12.952  23.539-104.936  1.00  0.00           C  
ATOM   3353  OG  SER B  63     -12.228  23.438-103.741  1.00  0.00           O  
ATOM   3354  H   SER B  63     -14.740  22.892-103.302  1.00  0.00           H  
ATOM   3355  HA  SER B  63     -14.349  22.407-106.101  1.00  0.00           H  
ATOM   3356 1HB  SER B  63     -12.263  23.646-105.774  1.00  0.00           H  
ATOM   3357 2HB  SER B  63     -13.577  24.431-104.912  1.00  0.00           H  
ATOM   3358  HG  SER B  63     -12.872  23.519-103.034  1.00  0.00           H  
ATOM   3359  N   ALA B  64     -12.644  20.406-104.181  1.00  0.00           N  
ATOM   3360  CA  ALA B  64     -11.896  19.114-104.160  1.00  0.00           C  
ATOM   3361  C   ALA B  64     -12.845  17.887-104.527  1.00  0.00           C  
ATOM   3362  O   ALA B  64     -12.362  16.980-105.202  1.00  0.00           O  
ATOM   3363  CB  ALA B  64     -11.234  18.962-102.767  1.00  0.00           C  
ATOM   3364  H   ALA B  64     -12.976  20.796-103.310  1.00  0.00           H  
ATOM   3365  HA  ALA B  64     -11.115  19.162-104.920  1.00  0.00           H  
ATOM   3366 1HB  ALA B  64     -10.681  18.024-102.727  1.00  0.00           H  
ATOM   3367 2HB  ALA B  64     -10.551  19.794-102.596  1.00  0.00           H  
ATOM   3368 3HB  ALA B  64     -12.005  18.961-101.997  1.00  0.00           H  
ATOM   3369  N   GLY B  65     -14.128  17.917-104.277  1.00  0.00           N  
ATOM   3370  CA  GLY B  65     -15.029  16.800-104.591  1.00  0.00           C  
ATOM   3371  C   GLY B  65     -15.087  15.683-103.580  1.00  0.00           C  
ATOM   3372  O   GLY B  65     -15.089  14.437-103.932  1.00  0.00           O  
ATOM   3373  H   GLY B  65     -14.507  18.750-103.849  1.00  0.00           H  
ATOM   3374 1HA  GLY B  65     -16.046  17.175-104.709  1.00  0.00           H  
ATOM   3375 2HA  GLY B  65     -14.738  16.354-105.541  1.00  0.00           H  
ATOM   3376  N   VAL B  66     -14.961  15.966-102.264  1.00  0.00           N  
ATOM   3377  CA  VAL B  66     -14.908  15.100-101.057  1.00  0.00           C  
ATOM   3378  C   VAL B  66     -15.950  15.460-100.014  1.00  0.00           C  
ATOM   3379  O   VAL B  66     -16.757  16.374-100.188  1.00  0.00           O  
ATOM   3380  CB  VAL B  66     -13.517  15.184-100.401  1.00  0.00           C  
ATOM   3381  CG1 VAL B  66     -12.443  14.705-101.366  1.00  0.00           C  
ATOM   3382  CG2 VAL B  66     -13.242  16.611 -99.953  1.00  0.00           C  
ATOM   3383  H   VAL B  66     -14.896  16.968-102.154  1.00  0.00           H  
ATOM   3384  HA  VAL B  66     -15.089  14.069-101.364  1.00  0.00           H  
ATOM   3385  HB  VAL B  66     -13.492  14.520 -99.537  1.00  0.00           H  
ATOM   3386 1HG1 VAL B  66     -11.466  14.772-100.886  1.00  0.00           H  
ATOM   3387 2HG1 VAL B  66     -12.640  13.670-101.646  1.00  0.00           H  
ATOM   3388 3HG1 VAL B  66     -12.451  15.331-102.259  1.00  0.00           H  
ATOM   3389 1HG2 VAL B  66     -12.257  16.664 -99.489  1.00  0.00           H  
ATOM   3390 2HG2 VAL B  66     -13.273  17.276-100.816  1.00  0.00           H  
ATOM   3391 3HG2 VAL B  66     -13.999  16.919 -99.231  1.00  0.00           H  
ATOM   3392  N   ALA B  67     -15.980  14.741 -98.856  1.00  0.00           N  
ATOM   3393  CA  ALA B  67     -16.946  14.996 -97.784  1.00  0.00           C  
ATOM   3394  C   ALA B  67     -16.856  16.446 -97.190  1.00  0.00           C  
ATOM   3395  O   ALA B  67     -15.777  16.985 -97.131  1.00  0.00           O  
ATOM   3396  CB  ALA B  67     -16.514  14.080 -96.706  1.00  0.00           C  
ATOM   3397  H   ALA B  67     -15.302  14.001 -98.742  1.00  0.00           H  
ATOM   3398  HA  ALA B  67     -17.948  14.902 -98.201  1.00  0.00           H  
ATOM   3399 1HB  ALA B  67     -17.175  14.191 -95.847  1.00  0.00           H  
ATOM   3400 2HB  ALA B  67     -16.554  13.052 -97.064  1.00  0.00           H  
ATOM   3401 3HB  ALA B  67     -15.493  14.321 -96.411  1.00  0.00           H  
ATOM   3402  N   THR B  68     -18.025  17.039 -96.775  1.00  0.00           N  
ATOM   3403  CA  THR B  68     -18.127  18.407 -96.273  1.00  0.00           C  
ATOM   3404  C   THR B  68     -17.834  18.588 -94.751  1.00  0.00           C  
ATOM   3405  O   THR B  68     -17.886  17.634 -93.941  1.00  0.00           O  
ATOM   3406  CB  THR B  68     -19.529  18.961 -96.586  1.00  0.00           C  
ATOM   3407  OG1 THR B  68     -20.515  18.203 -95.872  1.00  0.00           O  
ATOM   3408  CG2 THR B  68     -19.814  18.880 -98.077  1.00  0.00           C  
ATOM   3409  H   THR B  68     -18.859  16.471 -96.829  1.00  0.00           H  
ATOM   3410  HA  THR B  68     -17.379  19.017 -96.780  1.00  0.00           H  
ATOM   3411  HB  THR B  68     -19.589  20.001 -96.266  1.00  0.00           H  
ATOM   3412  HG1 THR B  68     -20.366  17.266 -96.021  1.00  0.00           H  
ATOM   3413 1HG2 THR B  68     -20.809  19.276 -98.279  1.00  0.00           H  
ATOM   3414 2HG2 THR B  68     -19.073  19.465 -98.622  1.00  0.00           H  
ATOM   3415 3HG2 THR B  68     -19.765  17.841 -98.401  1.00  0.00           H  
ATOM   3416  N   SER B  69     -17.784  19.926 -94.419  1.00  0.00           N  
ATOM   3417  CA  SER B  69     -17.570  20.391 -93.027  1.00  0.00           C  
ATOM   3418  C   SER B  69     -18.408  19.794 -91.961  1.00  0.00           C  
ATOM   3419  O   SER B  69     -17.919  19.480 -90.898  1.00  0.00           O  
ATOM   3420  CB  SER B  69     -17.771  21.892 -92.961  1.00  0.00           C  
ATOM   3421  OG  SER B  69     -16.772  22.565 -93.676  1.00  0.00           O  
ATOM   3422  H   SER B  69     -17.899  20.609 -95.154  1.00  0.00           H  
ATOM   3423  HA  SER B  69     -16.545  20.154 -92.737  1.00  0.00           H  
ATOM   3424 1HB  SER B  69     -18.749  22.146 -93.369  1.00  0.00           H  
ATOM   3425 2HB  SER B  69     -17.758  22.215 -91.921  1.00  0.00           H  
ATOM   3426  HG  SER B  69     -16.126  22.849 -93.026  1.00  0.00           H  
ATOM   3427  N   ALA B  70     -19.672  19.582 -92.154  1.00  0.00           N  
ATOM   3428  CA  ALA B  70     -20.612  18.895 -91.328  1.00  0.00           C  
ATOM   3429  C   ALA B  70     -20.584  17.318 -91.356  1.00  0.00           C  
ATOM   3430  O   ALA B  70     -21.265  16.729 -90.557  1.00  0.00           O  
ATOM   3431  CB  ALA B  70     -21.958  19.451 -91.735  1.00  0.00           C  
ATOM   3432  H   ALA B  70     -19.984  19.980 -93.028  1.00  0.00           H  
ATOM   3433  HA  ALA B  70     -20.389  19.137 -90.288  1.00  0.00           H  
ATOM   3434 1HB  ALA B  70     -22.742  18.976 -91.146  1.00  0.00           H  
ATOM   3435 2HB  ALA B  70     -21.976  20.527 -91.561  1.00  0.00           H  
ATOM   3436 3HB  ALA B  70     -22.128  19.253 -92.792  1.00  0.00           H  
ATOM   3437  N   ASP B  71     -19.906  16.669 -92.386  1.00  0.00           N  
ATOM   3438  CA  ASP B  71     -19.779  15.194 -92.403  1.00  0.00           C  
ATOM   3439  C   ASP B  71     -18.754  14.674 -91.382  1.00  0.00           C  
ATOM   3440  O   ASP B  71     -17.839  15.397 -90.933  1.00  0.00           O  
ATOM   3441  CB  ASP B  71     -19.384  14.714 -93.801  1.00  0.00           C  
ATOM   3442  CG  ASP B  71     -20.490  14.910 -94.830  1.00  0.00           C  
ATOM   3443  OD1 ASP B  71     -21.611  14.563 -94.541  1.00  0.00           O  
ATOM   3444  OD2 ASP B  71     -20.204  15.404 -95.893  1.00  0.00           O  
ATOM   3445  H   ASP B  71     -19.492  17.208 -93.134  1.00  0.00           H  
ATOM   3446  HA  ASP B  71     -20.745  14.761 -92.143  1.00  0.00           H  
ATOM   3447 1HB  ASP B  71     -18.498  15.254 -94.135  1.00  0.00           H  
ATOM   3448 2HB  ASP B  71     -19.127  13.655 -93.763  1.00  0.00           H  
ATOM   3449  N   ILE B  72     -18.849  13.400 -90.872  1.00  0.00           N  
ATOM   3450  CA  ILE B  72     -17.952  12.770 -89.810  1.00  0.00           C  
ATOM   3451  C   ILE B  72     -18.191  13.279 -88.446  1.00  0.00           C  
ATOM   3452  O   ILE B  72     -17.429  12.872 -87.552  1.00  0.00           O  
ATOM   3453  CB  ILE B  72     -16.459  12.990 -90.115  1.00  0.00           C  
ATOM   3454  CG1 ILE B  72     -16.076  12.305 -91.430  1.00  0.00           C  
ATOM   3455  CG2 ILE B  72     -15.601  12.471 -88.971  1.00  0.00           C  
ATOM   3456  CD1 ILE B  72     -14.716  12.705 -91.953  1.00  0.00           C  
ATOM   3457  H   ILE B  72     -19.603  12.856 -91.266  1.00  0.00           H  
ATOM   3458  HA  ILE B  72     -18.137  11.697 -89.794  1.00  0.00           H  
ATOM   3459  HB  ILE B  72     -16.267  14.054 -90.247  1.00  0.00           H  
ATOM   3460 1HG1 ILE B  72     -16.085  11.224 -91.292  1.00  0.00           H  
ATOM   3461 2HG1 ILE B  72     -16.818  12.542 -92.193  1.00  0.00           H  
ATOM   3462 1HG2 ILE B  72     -14.549  12.634 -89.204  1.00  0.00           H  
ATOM   3463 2HG2 ILE B  72     -15.856  13.003 -88.056  1.00  0.00           H  
ATOM   3464 3HG2 ILE B  72     -15.782  11.405 -88.835  1.00  0.00           H  
ATOM   3465 1HD1 ILE B  72     -14.516  12.179 -92.887  1.00  0.00           H  
ATOM   3466 2HD1 ILE B  72     -14.696  13.781 -92.132  1.00  0.00           H  
ATOM   3467 3HD1 ILE B  72     -13.953  12.444 -91.221  1.00  0.00           H  
ATOM   3468  N   LYS B  73     -19.312  14.015 -88.164  1.00  0.00           N  
ATOM   3469  CA  LYS B  73     -19.575  14.596 -86.834  1.00  0.00           C  
ATOM   3470  C   LYS B  73     -20.192  13.633 -85.828  1.00  0.00           C  
ATOM   3471  O   LYS B  73     -21.474  13.509 -85.753  1.00  0.00           O  
ATOM   3472  CB  LYS B  73     -20.486  15.817 -86.974  1.00  0.00           C  
ATOM   3473  CG  LYS B  73     -20.717  16.582 -85.678  1.00  0.00           C  
ATOM   3474  CD  LYS B  73     -21.561  17.825 -85.913  1.00  0.00           C  
ATOM   3475  CE  LYS B  73     -21.731  18.630 -84.632  1.00  0.00           C  
ATOM   3476  NZ  LYS B  73     -22.586  19.830 -84.839  1.00  0.00           N  
ATOM   3477  H   LYS B  73     -19.983  14.160 -88.905  1.00  0.00           H  
ATOM   3478  HA  LYS B  73     -18.626  14.910 -86.400  1.00  0.00           H  
ATOM   3479 1HB  LYS B  73     -20.057  16.509 -87.699  1.00  0.00           H  
ATOM   3480 2HB  LYS B  73     -21.458  15.504 -87.356  1.00  0.00           H  
ATOM   3481 1HG  LYS B  73     -21.226  15.937 -84.961  1.00  0.00           H  
ATOM   3482 2HG  LYS B  73     -19.758  16.879 -85.255  1.00  0.00           H  
ATOM   3483 1HD  LYS B  73     -21.083  18.453 -86.666  1.00  0.00           H  
ATOM   3484 2HD  LYS B  73     -22.545  17.533 -86.280  1.00  0.00           H  
ATOM   3485 1HE  LYS B  73     -22.186  18.003 -83.867  1.00  0.00           H  
ATOM   3486 2HE  LYS B  73     -20.754  18.953 -84.273  1.00  0.00           H  
ATOM   3487 1HZ  LYS B  73     -22.674  20.335 -83.968  1.00  0.00           H  
ATOM   3488 2HZ  LYS B  73     -22.164  20.429 -85.534  1.00  0.00           H  
ATOM   3489 3HZ  LYS B  73     -23.501  19.542 -85.154  1.00  0.00           H  
ATOM   3490  N   GLY B  74     -19.324  12.962 -85.110  1.00  0.00           N  
ATOM   3491  CA  GLY B  74     -19.719  12.036 -84.099  1.00  0.00           C  
ATOM   3492  C   GLY B  74     -18.666  11.941 -82.978  1.00  0.00           C  
ATOM   3493  O   GLY B  74     -18.360  12.969 -82.308  1.00  0.00           O  
ATOM   3494  H   GLY B  74     -18.340  13.111 -85.283  1.00  0.00           H  
ATOM   3495 1HA  GLY B  74     -20.676  12.345 -83.676  1.00  0.00           H  
ATOM   3496 2HA  GLY B  74     -19.867  11.053 -84.544  1.00  0.00           H  
ATOM   3497  N   LYS B  75     -18.129  10.761 -82.757  1.00  0.00           N  
ATOM   3498  CA  LYS B  75     -17.033  10.521 -81.760  1.00  0.00           C  
ATOM   3499  C   LYS B  75     -15.861  11.518 -81.820  1.00  0.00           C  
ATOM   3500  O   LYS B  75     -15.018  11.590 -82.704  1.00  0.00           O  
ATOM   3501  CB  LYS B  75     -16.479   9.105 -81.930  1.00  0.00           C  
ATOM   3502  CG  LYS B  75     -15.346   8.754 -80.975  1.00  0.00           C  
ATOM   3503  CD  LYS B  75     -14.862   7.328 -81.192  1.00  0.00           C  
ATOM   3504  CE  LYS B  75     -13.641   7.021 -80.338  1.00  0.00           C  
ATOM   3505  NZ  LYS B  75     -13.149   5.632 -80.550  1.00  0.00           N  
ATOM   3506  H   LYS B  75     -18.484   9.983 -83.296  1.00  0.00           H  
ATOM   3507  HA  LYS B  75     -17.449  10.620 -80.757  1.00  0.00           H  
ATOM   3508 1HB  LYS B  75     -17.280   8.381 -81.780  1.00  0.00           H  
ATOM   3509 2HB  LYS B  75     -16.110   8.979 -82.948  1.00  0.00           H  
ATOM   3510 1HG  LYS B  75     -14.512   9.439 -81.132  1.00  0.00           H  
ATOM   3511 2HG  LYS B  75     -15.691   8.859 -79.947  1.00  0.00           H  
ATOM   3512 1HD  LYS B  75     -15.660   6.630 -80.935  1.00  0.00           H  
ATOM   3513 2HD  LYS B  75     -14.604   7.187 -82.242  1.00  0.00           H  
ATOM   3514 1HE  LYS B  75     -12.841   7.718 -80.584  1.00  0.00           H  
ATOM   3515 2HE  LYS B  75     -13.892   7.147 -79.285  1.00  0.00           H  
ATOM   3516 1HZ  LYS B  75     -12.340   5.468 -79.966  1.00  0.00           H  
ATOM   3517 2HZ  LYS B  75     -13.877   4.975 -80.307  1.00  0.00           H  
ATOM   3518 3HZ  LYS B  75     -12.894   5.509 -81.519  1.00  0.00           H  
ATOM   3519  N   TYR B  76     -15.924  12.486 -80.911  1.00  0.00           N  
ATOM   3520  CA  TYR B  76     -14.912  13.565 -80.774  1.00  0.00           C  
ATOM   3521  C   TYR B  76     -14.716  14.675 -81.864  1.00  0.00           C  
ATOM   3522  O   TYR B  76     -14.311  15.791 -81.488  1.00  0.00           O  
ATOM   3523  CB  TYR B  76     -13.561  12.880 -80.557  1.00  0.00           C  
ATOM   3524  CG  TYR B  76     -13.535  11.946 -79.368  1.00  0.00           C  
ATOM   3525  CD1 TYR B  76     -14.266  12.251 -78.229  1.00  0.00           C  
ATOM   3526  CD2 TYR B  76     -12.779  10.784 -79.416  1.00  0.00           C  
ATOM   3527  CE1 TYR B  76     -14.242  11.397 -77.143  1.00  0.00           C  
ATOM   3528  CE2 TYR B  76     -12.755   9.930 -78.330  1.00  0.00           C  
ATOM   3529  CZ  TYR B  76     -13.482  10.234 -77.198  1.00  0.00           C  
ATOM   3530  OH  TYR B  76     -13.458   9.383 -76.116  1.00  0.00           O  
ATOM   3531  H   TYR B  76     -16.715  12.471 -80.284  1.00  0.00           H  
ATOM   3532  HA  TYR B  76     -15.172  14.175 -79.909  1.00  0.00           H  
ATOM   3533 1HB  TYR B  76     -13.296  12.307 -81.447  1.00  0.00           H  
ATOM   3534 2HB  TYR B  76     -12.789  13.636 -80.413  1.00  0.00           H  
ATOM   3535  HD1 TYR B  76     -14.860  13.164 -78.192  1.00  0.00           H  
ATOM   3536  HD2 TYR B  76     -12.203  10.545 -80.310  1.00  0.00           H  
ATOM   3537  HE1 TYR B  76     -14.816  11.637 -76.249  1.00  0.00           H  
ATOM   3538  HE2 TYR B  76     -12.160   9.017 -78.368  1.00  0.00           H  
ATOM   3539  HH  TYR B  76     -12.935   8.608 -76.332  1.00  0.00           H  
ATOM   3540  N   VAL B  77     -14.910  14.470 -83.205  1.00  0.00           N  
ATOM   3541  CA  VAL B  77     -14.754  15.482 -84.231  1.00  0.00           C  
ATOM   3542  C   VAL B  77     -16.098  16.213 -84.394  1.00  0.00           C  
ATOM   3543  O   VAL B  77     -17.119  15.628 -84.708  1.00  0.00           O  
ATOM   3544  CB  VAL B  77     -14.324  14.845 -85.566  1.00  0.00           C  
ATOM   3545  CG1 VAL B  77     -14.209  15.906 -86.650  1.00  0.00           C  
ATOM   3546  CG2 VAL B  77     -13.003  14.111 -85.387  1.00  0.00           C  
ATOM   3547  H   VAL B  77     -15.182  13.535 -83.473  1.00  0.00           H  
ATOM   3548  HA  VAL B  77     -13.978  16.179 -83.914  1.00  0.00           H  
ATOM   3549  HB  VAL B  77     -15.091  14.141 -85.886  1.00  0.00           H  
ATOM   3550 1HG1 VAL B  77     -13.904  15.439 -87.586  1.00  0.00           H  
ATOM   3551 2HG1 VAL B  77     -15.174  16.394 -86.786  1.00  0.00           H  
ATOM   3552 3HG1 VAL B  77     -13.465  16.647 -86.356  1.00  0.00           H  
ATOM   3553 1HG2 VAL B  77     -12.705  13.663 -86.335  1.00  0.00           H  
ATOM   3554 2HG2 VAL B  77     -12.237  14.815 -85.061  1.00  0.00           H  
ATOM   3555 3HG2 VAL B  77     -13.120  13.329 -84.637  1.00  0.00           H  
ATOM   3556  N   GLN B  78     -16.089  17.562 -84.221  1.00  0.00           N  
ATOM   3557  CA  GLN B  78     -17.230  18.419 -84.469  1.00  0.00           C  
ATOM   3558  C   GLN B  78     -17.268  19.079 -85.801  1.00  0.00           C  
ATOM   3559  O   GLN B  78     -18.290  19.773 -86.059  1.00  0.00           O  
ATOM   3560  CB  GLN B  78     -17.301  19.504 -83.391  1.00  0.00           C  
ATOM   3561  CG  GLN B  78     -17.451  18.969 -81.978  1.00  0.00           C  
ATOM   3562  CD  GLN B  78     -18.729  18.173 -81.793  1.00  0.00           C  
ATOM   3563  OE1 GLN B  78     -19.832  18.688 -81.991  1.00  0.00           O  
ATOM   3564  NE2 GLN B  78     -18.587  16.908 -81.411  1.00  0.00           N  
ATOM   3565  H   GLN B  78     -15.226  17.974 -83.898  1.00  0.00           H  
ATOM   3566  HA  GLN B  78     -18.135  17.813 -84.423  1.00  0.00           H  
ATOM   3567 1HB  GLN B  78     -16.396  20.112 -83.427  1.00  0.00           H  
ATOM   3568 2HB  GLN B  78     -18.145  20.163 -83.593  1.00  0.00           H  
ATOM   3569 1HG  GLN B  78     -16.606  18.317 -81.755  1.00  0.00           H  
ATOM   3570 2HG  GLN B  78     -17.468  19.808 -81.282  1.00  0.00           H  
ATOM   3571 1HE2 GLN B  78     -19.394  16.333 -81.273  1.00  0.00           H  
ATOM   3572 2HE2 GLN B  78     -17.673  16.530 -81.262  1.00  0.00           H  
ATOM   3573  N   SER B  79     -16.248  19.013 -86.672  1.00  0.00           N  
ATOM   3574  CA  SER B  79     -16.137  19.592 -87.997  1.00  0.00           C  
ATOM   3575  C   SER B  79     -14.890  19.159 -88.719  1.00  0.00           C  
ATOM   3576  O   SER B  79     -13.827  19.053 -88.102  1.00  0.00           O  
ATOM   3577  CB  SER B  79     -16.161  21.105 -87.901  1.00  0.00           C  
ATOM   3578  OG  SER B  79     -16.034  21.690 -89.168  1.00  0.00           O  
ATOM   3579  H   SER B  79     -15.477  18.474 -86.305  1.00  0.00           H  
ATOM   3580  HA  SER B  79     -16.990  19.261 -88.592  1.00  0.00           H  
ATOM   3581 1HB  SER B  79     -17.096  21.425 -87.442  1.00  0.00           H  
ATOM   3582 2HB  SER B  79     -15.349  21.441 -87.259  1.00  0.00           H  
ATOM   3583  HG  SER B  79     -16.763  21.351 -89.691  1.00  0.00           H  
ATOM   3584  N   VAL B  80     -14.953  18.974 -90.071  1.00  0.00           N  
ATOM   3585  CA  VAL B  80     -13.839  18.524 -90.963  1.00  0.00           C  
ATOM   3586  C   VAL B  80     -13.594  19.426 -92.237  1.00  0.00           C  
ATOM   3587  O   VAL B  80     -13.586  18.943 -93.398  1.00  0.00           O  
ATOM   3588  CB  VAL B  80     -14.122  17.083 -91.428  1.00  0.00           C  
ATOM   3589  CG1 VAL B  80     -14.033  16.118 -90.255  1.00  0.00           C  
ATOM   3590  CG2 VAL B  80     -15.493  17.010 -92.083  1.00  0.00           C  
ATOM   3591  H   VAL B  80     -15.858  19.170 -90.474  1.00  0.00           H  
ATOM   3592  HA  VAL B  80     -12.909  18.545 -90.394  1.00  0.00           H  
ATOM   3593  HB  VAL B  80     -13.358  16.786 -92.147  1.00  0.00           H  
ATOM   3594 1HG1 VAL B  80     -14.235  15.104 -90.601  1.00  0.00           H  
ATOM   3595 2HG1 VAL B  80     -13.033  16.161 -89.824  1.00  0.00           H  
ATOM   3596 3HG1 VAL B  80     -14.767  16.396 -89.499  1.00  0.00           H  
ATOM   3597 1HG2 VAL B  80     -15.686  15.989 -92.410  1.00  0.00           H  
ATOM   3598 2HG2 VAL B  80     -16.256  17.312 -91.365  1.00  0.00           H  
ATOM   3599 3HG2 VAL B  80     -15.520  17.677 -92.945  1.00  0.00           H  
ATOM   3600  N   THR B  81     -13.575  20.717 -91.971  1.00  0.00           N  
ATOM   3601  CA  THR B  81     -13.311  21.858 -92.919  1.00  0.00           C  
ATOM   3602  C   THR B  81     -11.923  21.914 -93.572  1.00  0.00           C  
ATOM   3603  O   THR B  81     -10.875  21.861 -92.858  1.00  0.00           O  
ATOM   3604  CB  THR B  81     -13.539  23.203 -92.204  1.00  0.00           C  
ATOM   3605  OG1 THR B  81     -14.894  23.277 -91.741  1.00  0.00           O  
ATOM   3606  CG2 THR B  81     -13.267  24.363 -93.150  1.00  0.00           C  
ATOM   3607  H   THR B  81     -13.766  20.918 -91.000  1.00  0.00           H  
ATOM   3608  HA  THR B  81     -14.006  21.781 -93.755  1.00  0.00           H  
ATOM   3609  HB  THR B  81     -12.872  23.277 -91.346  1.00  0.00           H  
ATOM   3610  HG1 THR B  81     -14.901  23.332 -90.782  1.00  0.00           H  
ATOM   3611 1HG2 THR B  81     -13.433  25.305 -92.627  1.00  0.00           H  
ATOM   3612 2HG2 THR B  81     -12.234  24.316 -93.495  1.00  0.00           H  
ATOM   3613 3HG2 THR B  81     -13.938  24.300 -94.005  1.00  0.00           H  
ATOM   3614  N   VAL B  82     -11.897  21.946 -94.898  1.00  0.00           N  
ATOM   3615  CA  VAL B  82     -10.615  22.074 -95.616  1.00  0.00           C  
ATOM   3616  C   VAL B  82     -10.447  23.465 -96.181  1.00  0.00           C  
ATOM   3617  O   VAL B  82     -11.414  23.977 -96.781  1.00  0.00           O  
ATOM   3618  CB  VAL B  82     -10.529  21.052 -96.765  1.00  0.00           C  
ATOM   3619  CG1 VAL B  82      -9.255  21.262 -97.569  1.00  0.00           C  
ATOM   3620  CG2 VAL B  82     -10.588  19.639 -96.207  1.00  0.00           C  
ATOM   3621  H   VAL B  82     -12.754  21.884 -95.429  1.00  0.00           H  
ATOM   3622  HA  VAL B  82      -9.804  21.875 -94.914  1.00  0.00           H  
ATOM   3623  HB  VAL B  82     -11.367  21.211 -97.444  1.00  0.00           H  
ATOM   3624 1HG1 VAL B  82      -9.210  20.531 -98.378  1.00  0.00           H  
ATOM   3625 2HG1 VAL B  82      -9.251  22.268 -97.989  1.00  0.00           H  
ATOM   3626 3HG1 VAL B  82      -8.389  21.135 -96.919  1.00  0.00           H  
ATOM   3627 1HG2 VAL B  82     -10.528  18.922 -97.025  1.00  0.00           H  
ATOM   3628 2HG2 VAL B  82      -9.754  19.482 -95.523  1.00  0.00           H  
ATOM   3629 3HG2 VAL B  82     -11.527  19.498 -95.671  1.00  0.00           H  
ATOM   3630  N   ALA B  83      -9.256  24.050 -96.083  1.00  0.00           N  
ATOM   3631  CA  ALA B  83      -8.915  25.441 -96.546  1.00  0.00           C  
ATOM   3632  C   ALA B  83      -7.554  25.500 -97.276  1.00  0.00           C  
ATOM   3633  O   ALA B  83      -6.529  25.410 -96.642  1.00  0.00           O  
ATOM   3634  CB  ALA B  83      -9.101  26.369 -95.338  1.00  0.00           C  
ATOM   3635  H   ALA B  83      -8.538  23.483 -95.656  1.00  0.00           H  
ATOM   3636  HA  ALA B  83      -9.678  25.759 -97.256  1.00  0.00           H  
ATOM   3637 1HB  ALA B  83      -8.864  27.394 -95.626  1.00  0.00           H  
ATOM   3638 2HB  ALA B  83     -10.135  26.319 -94.996  1.00  0.00           H  
ATOM   3639 3HB  ALA B  83      -8.437  26.056 -94.534  1.00  0.00           H  
ATOM   3640  N   ASN B  84      -7.565  25.602 -98.573  1.00  0.00           N  
ATOM   3641  CA  ASN B  84      -6.361  25.728 -99.477  1.00  0.00           C  
ATOM   3642  C   ASN B  84      -5.269  24.604 -99.113  1.00  0.00           C  
ATOM   3643  O   ASN B  84      -4.068  24.889 -98.965  1.00  0.00           O  
ATOM   3644  CB  ASN B  84      -5.769  27.122 -99.379  1.00  0.00           C  
ATOM   3645  CG  ASN B  84      -6.692  28.181 -99.916  1.00  0.00           C  
ATOM   3646  OD1 ASN B  84      -7.239  28.045-101.016  1.00  0.00           O  
ATOM   3647  ND2 ASN B  84      -6.876  29.233 -99.159  1.00  0.00           N  
ATOM   3648  H   ASN B  84      -8.489  25.593 -98.982  1.00  0.00           H  
ATOM   3649  HA  ASN B  84      -6.681  25.556-100.505  1.00  0.00           H  
ATOM   3650 1HB  ASN B  84      -5.542  27.349 -98.336  1.00  0.00           H  
ATOM   3651 2HB  ASN B  84      -4.832  27.159 -99.934  1.00  0.00           H  
ATOM   3652 1HD2 ASN B  84      -7.480  29.969 -99.466  1.00  0.00           H  
ATOM   3653 2HD2 ASN B  84      -6.414  29.300 -98.276  1.00  0.00           H  
ATOM   3654  N   GLY B  85      -5.641  23.289 -98.984  1.00  0.00           N  
ATOM   3655  CA  GLY B  85      -4.714  22.160 -98.707  1.00  0.00           C  
ATOM   3656  C   GLY B  85      -4.376  21.973 -97.195  1.00  0.00           C  
ATOM   3657  O   GLY B  85      -3.417  21.326 -96.839  1.00  0.00           O  
ATOM   3658  H   GLY B  85      -6.628  23.101 -99.089  1.00  0.00           H  
ATOM   3659 1HA  GLY B  85      -5.151  21.232 -99.077  1.00  0.00           H  
ATOM   3660 2HA  GLY B  85      -3.782  22.314 -99.249  1.00  0.00           H  
ATOM   3661  N   VAL B  86      -5.073  22.673 -96.310  1.00  0.00           N  
ATOM   3662  CA  VAL B  86      -4.899  22.576 -94.858  1.00  0.00           C  
ATOM   3663  C   VAL B  86      -6.236  22.005 -94.359  1.00  0.00           C  
ATOM   3664  O   VAL B  86      -7.307  22.365 -94.864  1.00  0.00           O  
ATOM   3665  CB  VAL B  86      -4.604  23.944 -94.214  1.00  0.00           C  
ATOM   3666  CG1 VAL B  86      -4.482  23.807 -92.704  1.00  0.00           C  
ATOM   3667  CG2 VAL B  86      -3.332  24.531 -94.807  1.00  0.00           C  
ATOM   3668  H   VAL B  86      -5.763  23.310 -96.682  1.00  0.00           H  
ATOM   3669  HA  VAL B  86      -4.051  21.921 -94.654  1.00  0.00           H  
ATOM   3670  HB  VAL B  86      -5.440  24.615 -94.410  1.00  0.00           H  
ATOM   3671 1HG1 VAL B  86      -4.274  24.783 -92.266  1.00  0.00           H  
ATOM   3672 2HG1 VAL B  86      -5.416  23.419 -92.297  1.00  0.00           H  
ATOM   3673 3HG1 VAL B  86      -3.669  23.122 -92.465  1.00  0.00           H  
ATOM   3674 1HG2 VAL B  86      -3.130  25.498 -94.348  1.00  0.00           H  
ATOM   3675 2HG2 VAL B  86      -2.497  23.857 -94.617  1.00  0.00           H  
ATOM   3676 3HG2 VAL B  86      -3.457  24.659 -95.883  1.00  0.00           H  
ATOM   3677  N   ILE B  87      -6.212  21.005 -93.528  1.00  0.00           N  
ATOM   3678  CA  ILE B  87      -7.409  20.319 -92.936  1.00  0.00           C  
ATOM   3679  C   ILE B  87      -7.529  20.734 -91.457  1.00  0.00           C  
ATOM   3680  O   ILE B  87      -6.707  20.269 -90.691  1.00  0.00           O  
ATOM   3681  CB  ILE B  87      -7.307  18.786 -93.042  1.00  0.00           C  
ATOM   3682  CG1 ILE B  87      -7.141  18.362 -94.503  1.00  0.00           C  
ATOM   3683  CG2 ILE B  87      -8.534  18.128 -92.430  1.00  0.00           C  
ATOM   3684  CD1 ILE B  87      -6.716  16.921 -94.676  1.00  0.00           C  
ATOM   3685  H   ILE B  87      -5.287  20.685 -93.277  1.00  0.00           H  
ATOM   3686  HA  ILE B  87      -8.295  20.634 -93.487  1.00  0.00           H  
ATOM   3687  HB  ILE B  87      -6.420  18.444 -92.511  1.00  0.00           H  
ATOM   3688 1HG1 ILE B  87      -8.081  18.507 -95.034  1.00  0.00           H  
ATOM   3689 2HG1 ILE B  87      -6.395  18.995 -94.984  1.00  0.00           H  
ATOM   3690 1HG2 ILE B  87      -8.446  17.045 -92.513  1.00  0.00           H  
ATOM   3691 2HG2 ILE B  87      -8.609  18.406 -91.379  1.00  0.00           H  
ATOM   3692 3HG2 ILE B  87      -9.428  18.461 -92.958  1.00  0.00           H  
ATOM   3693 1HD1 ILE B  87      -6.619  16.695 -95.738  1.00  0.00           H  
ATOM   3694 2HD1 ILE B  87      -5.757  16.762 -94.182  1.00  0.00           H  
ATOM   3695 3HD1 ILE B  87      -7.466  16.266 -94.234  1.00  0.00           H  
ATOM   3696  N   THR B  88      -8.618  21.418 -91.042  1.00  0.00           N  
ATOM   3697  CA  THR B  88      -8.879  21.869 -89.675  1.00  0.00           C  
ATOM   3698  C   THR B  88     -10.078  21.137 -89.062  1.00  0.00           C  
ATOM   3699  O   THR B  88     -11.176  21.071 -89.703  1.00  0.00           O  
ATOM   3700  CB  THR B  88      -9.125  23.389 -89.634  1.00  0.00           C  
ATOM   3701  OG1 THR B  88      -7.965  24.077 -90.118  1.00  0.00           O  
ATOM   3702  CG2 THR B  88      -9.423  23.843 -88.213  1.00  0.00           C  
ATOM   3703  H   THR B  88      -9.294  21.621 -91.764  1.00  0.00           H  
ATOM   3704  HA  THR B  88      -8.004  21.646 -89.064  1.00  0.00           H  
ATOM   3705  HB  THR B  88      -9.972  23.638 -90.273  1.00  0.00           H  
ATOM   3706  HG1 THR B  88      -7.209  23.854 -89.569  1.00  0.00           H  
ATOM   3707 1HG2 THR B  88      -9.594  24.919 -88.203  1.00  0.00           H  
ATOM   3708 2HG2 THR B  88     -10.312  23.330 -87.846  1.00  0.00           H  
ATOM   3709 3HG2 THR B  88      -8.576  23.605 -87.570  1.00  0.00           H  
ATOM   3710  N   ALA B  89      -9.904  20.618 -87.868  1.00  0.00           N  
ATOM   3711  CA  ALA B  89     -10.970  19.861 -87.217  1.00  0.00           C  
ATOM   3712  C   ALA B  89     -11.137  20.344 -85.756  1.00  0.00           C  
ATOM   3713  O   ALA B  89     -10.113  20.729 -85.124  1.00  0.00           O  
ATOM   3714  CB  ALA B  89     -10.668  18.344 -87.413  1.00  0.00           C  
ATOM   3715  H   ALA B  89      -9.024  20.741 -87.388  1.00  0.00           H  
ATOM   3716  HA  ALA B  89     -11.899  20.053 -87.755  1.00  0.00           H  
ATOM   3717 1HB  ALA B  89     -11.449  17.752 -86.936  1.00  0.00           H  
ATOM   3718 2HB  ALA B  89     -10.637  18.113 -88.478  1.00  0.00           H  
ATOM   3719 3HB  ALA B  89      -9.706  18.104 -86.962  1.00  0.00           H  
ATOM   3720  N   GLN B  90     -12.335  20.288 -85.157  1.00  0.00           N  
ATOM   3721  CA  GLN B  90     -12.623  20.725 -83.791  1.00  0.00           C  
ATOM   3722  C   GLN B  90     -12.987  19.557 -82.849  1.00  0.00           C  
ATOM   3723  O   GLN B  90     -13.688  18.599 -83.202  1.00  0.00           O  
ATOM   3724  CB  GLN B  90     -13.758  21.753 -83.805  1.00  0.00           C  
ATOM   3725  CG  GLN B  90     -14.084  22.340 -82.442  1.00  0.00           C  
ATOM   3726  CD  GLN B  90     -15.135  23.430 -82.518  1.00  0.00           C  
ATOM   3727  OE1 GLN B  90     -15.938  23.473 -83.454  1.00  0.00           O  
ATOM   3728  NE2 GLN B  90     -15.138  24.318 -81.531  1.00  0.00           N  
ATOM   3729  H   GLN B  90     -13.082  19.907 -85.719  1.00  0.00           H  
ATOM   3730  HA  GLN B  90     -11.727  21.192 -83.381  1.00  0.00           H  
ATOM   3731 1HB  GLN B  90     -13.497  22.574 -84.472  1.00  0.00           H  
ATOM   3732 2HB  GLN B  90     -14.663  21.289 -84.197  1.00  0.00           H  
ATOM   3733 1HG  GLN B  90     -14.460  21.546 -81.797  1.00  0.00           H  
ATOM   3734 2HG  GLN B  90     -13.176  22.769 -82.017  1.00  0.00           H  
ATOM   3735 1HE2 GLN B  90     -15.809  25.061 -81.527  1.00  0.00           H  
ATOM   3736 2HE2 GLN B  90     -14.469  24.246 -80.791  1.00  0.00           H  
ATOM   3737  N   MET B  91     -12.455  19.542 -81.651  1.00  0.00           N  
ATOM   3738  CA  MET B  91     -12.774  18.544 -80.616  1.00  0.00           C  
ATOM   3739  C   MET B  91     -14.183  18.727 -79.921  1.00  0.00           C  
ATOM   3740  O   MET B  91     -14.529  19.838 -79.688  1.00  0.00           O  
ATOM   3741  CB  MET B  91     -11.664  18.565 -79.568  1.00  0.00           C  
ATOM   3742  CG  MET B  91     -11.866  17.588 -78.418  1.00  0.00           C  
ATOM   3743  SD  MET B  91     -11.935  15.871 -78.968  1.00  0.00           S  
ATOM   3744  CE  MET B  91     -10.226  15.594 -79.425  1.00  0.00           C  
ATOM   3745  H   MET B  91     -11.786  20.270 -81.443  1.00  0.00           H  
ATOM   3746  HA  MET B  91     -12.817  17.561 -81.085  1.00  0.00           H  
ATOM   3747 1HB  MET B  91     -10.712  18.330 -80.042  1.00  0.00           H  
ATOM   3748 2HB  MET B  91     -11.581  19.567 -79.145  1.00  0.00           H  
ATOM   3749 1HG  MET B  91     -11.047  17.690 -77.706  1.00  0.00           H  
ATOM   3750 2HG  MET B  91     -12.796  17.822 -77.901  1.00  0.00           H  
ATOM   3751 1HE  MET B  91     -10.107  14.572 -79.786  1.00  0.00           H  
ATOM   3752 2HE  MET B  91      -9.941  16.293 -80.212  1.00  0.00           H  
ATOM   3753 3HE  MET B  91      -9.587  15.747 -78.555  1.00  0.00           H  
ATOM   3754  N   ALA B  92     -14.854  17.610 -79.501  1.00  0.00           N  
ATOM   3755  CA  ALA B  92     -16.095  17.576 -78.844  1.00  0.00           C  
ATOM   3756  C   ALA B  92     -16.118  18.495 -77.576  1.00  0.00           C  
ATOM   3757  O   ALA B  92     -15.140  18.656 -76.820  1.00  0.00           O  
ATOM   3758  CB  ALA B  92     -16.514  16.185 -78.404  1.00  0.00           C  
ATOM   3759  H   ALA B  92     -14.379  16.741 -79.701  1.00  0.00           H  
ATOM   3760  HA  ALA B  92     -16.850  17.968 -79.525  1.00  0.00           H  
ATOM   3761 1HB  ALA B  92     -17.481  16.238 -77.904  1.00  0.00           H  
ATOM   3762 2HB  ALA B  92     -16.591  15.536 -79.276  1.00  0.00           H  
ATOM   3763 3HB  ALA B  92     -15.771  15.783 -77.716  1.00  0.00           H  
ATOM   3764  N   SER B  93     -17.256  19.135 -77.329  1.00  0.00           N  
ATOM   3765  CA  SER B  93     -17.485  19.909 -76.152  1.00  0.00           C  
ATOM   3766  C   SER B  93     -17.799  19.163 -74.876  1.00  0.00           C  
ATOM   3767  O   SER B  93     -17.921  19.771 -73.797  1.00  0.00           O  
ATOM   3768  CB  SER B  93     -18.618  20.874 -76.440  1.00  0.00           C  
ATOM   3769  OG  SER B  93     -19.832  20.191 -76.597  1.00  0.00           O  
ATOM   3770  H   SER B  93     -17.990  19.061 -78.020  1.00  0.00           H  
ATOM   3771  HA  SER B  93     -16.575  20.465 -75.921  1.00  0.00           H  
ATOM   3772 1HB  SER B  93     -18.704  21.589 -75.622  1.00  0.00           H  
ATOM   3773 2HB  SER B  93     -18.395  21.438 -77.345  1.00  0.00           H  
ATOM   3774  HG  SER B  93     -20.523  20.842 -76.453  1.00  0.00           H  
ATOM   3775  N   SER B  94     -18.103  17.824 -74.993  1.00  0.00           N  
ATOM   3776  CA  SER B  94     -18.427  17.032 -73.821  1.00  0.00           C  
ATOM   3777  C   SER B  94     -17.690  15.617 -73.954  1.00  0.00           C  
ATOM   3778  O   SER B  94     -17.271  15.145 -75.030  1.00  0.00           O  
ATOM   3779  CB  SER B  94     -19.930  16.872 -73.708  1.00  0.00           C  
ATOM   3780  OG  SER B  94     -20.435  16.109 -74.769  1.00  0.00           O  
ATOM   3781  H   SER B  94     -18.101  17.381 -75.901  1.00  0.00           H  
ATOM   3782  HA  SER B  94     -18.059  17.554 -72.937  1.00  0.00           H  
ATOM   3783 1HB  SER B  94     -20.175  16.390 -72.761  1.00  0.00           H  
ATOM   3784 2HB  SER B  94     -20.401  17.854 -73.707  1.00  0.00           H  
ATOM   3785  HG  SER B  94     -20.763  16.738 -75.415  1.00  0.00           H  
ATOM   3786  N   ASN B  95     -17.699  14.929 -72.804  1.00  0.00           N  
ATOM   3787  CA  ASN B  95     -17.025  13.733 -72.582  1.00  0.00           C  
ATOM   3788  C   ASN B  95     -15.500  13.621 -72.929  1.00  0.00           C  
ATOM   3789  O   ASN B  95     -14.879  12.553 -73.003  1.00  0.00           O  
ATOM   3790  CB  ASN B  95     -17.818  12.668 -73.317  1.00  0.00           C  
ATOM   3791  CG  ASN B  95     -19.188  12.462 -72.733  1.00  0.00           C  
ATOM   3792  OD1 ASN B  95     -19.357  12.433 -71.509  1.00  0.00           O  
ATOM   3793  ND2 ASN B  95     -20.170  12.317 -73.586  1.00  0.00           N  
ATOM   3794  H   ASN B  95     -18.247  15.332 -72.057  1.00  0.00           H  
ATOM   3795  HA  ASN B  95     -17.014  13.537 -71.508  1.00  0.00           H  
ATOM   3796 1HB  ASN B  95     -17.921  12.950 -74.366  1.00  0.00           H  
ATOM   3797 2HB  ASN B  95     -17.276  11.723 -73.284  1.00  0.00           H  
ATOM   3798 1HD2 ASN B  95     -21.104  12.177 -73.255  1.00  0.00           H  
ATOM   3799 2HD2 ASN B  95     -19.988  12.348 -74.568  1.00  0.00           H  
ATOM   3800  N   VAL B  96     -14.772  14.710 -72.931  1.00  0.00           N  
ATOM   3801  CA  VAL B  96     -13.333  14.760 -73.178  1.00  0.00           C  
ATOM   3802  C   VAL B  96     -12.610  15.501 -72.087  1.00  0.00           C  
ATOM   3803  O   VAL B  96     -13.252  16.263 -71.381  1.00  0.00           O  
ATOM   3804  CB  VAL B  96     -13.039  15.444 -74.527  1.00  0.00           C  
ATOM   3805  CG1 VAL B  96     -13.692  14.676 -75.667  1.00  0.00           C  
ATOM   3806  CG2 VAL B  96     -13.531  16.883 -74.494  1.00  0.00           C  
ATOM   3807  H   VAL B  96     -15.269  15.569 -72.744  1.00  0.00           H  
ATOM   3808  HA  VAL B  96     -12.953  13.738 -73.217  1.00  0.00           H  
ATOM   3809  HB  VAL B  96     -11.964  15.431 -74.704  1.00  0.00           H  
ATOM   3810 1HG1 VAL B  96     -13.474  15.174 -76.612  1.00  0.00           H  
ATOM   3811 2HG1 VAL B  96     -13.299  13.660 -75.693  1.00  0.00           H  
ATOM   3812 3HG1 VAL B  96     -14.771  14.646 -75.514  1.00  0.00           H  
ATOM   3813 1HG2 VAL B  96     -13.320  17.361 -75.450  1.00  0.00           H  
ATOM   3814 2HG2 VAL B  96     -14.606  16.897 -74.311  1.00  0.00           H  
ATOM   3815 3HG2 VAL B  96     -13.020  17.424 -73.698  1.00  0.00           H  
ATOM   3816  N   ASN B  97     -11.297  15.328 -71.915  1.00  0.00           N  
ATOM   3817  CA  ASN B  97     -10.469  16.035 -70.842  1.00  0.00           C  
ATOM   3818  C   ASN B  97     -10.604  17.620 -70.977  1.00  0.00           C  
ATOM   3819  O   ASN B  97     -10.557  18.130 -72.116  1.00  0.00           O  
ATOM   3820  CB  ASN B  97      -9.014  15.611 -70.920  1.00  0.00           C  
ATOM   3821  CG  ASN B  97      -8.806  14.180 -70.511  1.00  0.00           C  
ATOM   3822  OD1 ASN B  97      -9.731  13.520 -70.022  1.00  0.00           O  
ATOM   3823  ND2 ASN B  97      -7.609  13.686 -70.700  1.00  0.00           N  
ATOM   3824  H   ASN B  97     -10.839  14.684 -72.544  1.00  0.00           H  
ATOM   3825  HA  ASN B  97     -10.860  15.755 -69.863  1.00  0.00           H  
ATOM   3826 1HB  ASN B  97      -8.651  15.742 -71.941  1.00  0.00           H  
ATOM   3827 2HB  ASN B  97      -8.414  16.252 -70.275  1.00  0.00           H  
ATOM   3828 1HD2 ASN B  97      -7.413  12.738 -70.446  1.00  0.00           H  
ATOM   3829 2HD2 ASN B  97      -6.891  14.256 -71.098  1.00  0.00           H  
ATOM   3830  N   ASN B  98     -10.886  18.325 -69.881  1.00  0.00           N  
ATOM   3831  CA  ASN B  98     -11.079  19.761 -69.940  1.00  0.00           C  
ATOM   3832  C   ASN B  98     -10.091  20.560 -70.876  1.00  0.00           C  
ATOM   3833  O   ASN B  98     -10.552  21.456 -71.538  1.00  0.00           O  
ATOM   3834  CB  ASN B  98     -11.017  20.302 -68.524  1.00  0.00           C  
ATOM   3835  CG  ASN B  98     -11.419  21.748 -68.440  1.00  0.00           C  
ATOM   3836  OD1 ASN B  98     -12.567  22.104 -68.730  1.00  0.00           O  
ATOM   3837  ND2 ASN B  98     -10.496  22.589 -68.049  1.00  0.00           N  
ATOM   3838  H   ASN B  98     -10.967  17.854 -68.991  1.00  0.00           H  
ATOM   3839  HA  ASN B  98     -12.061  19.961 -70.370  1.00  0.00           H  
ATOM   3840 1HB  ASN B  98     -11.676  19.716 -67.881  1.00  0.00           H  
ATOM   3841 2HB  ASN B  98     -10.004  20.196 -68.137  1.00  0.00           H  
ATOM   3842 1HD2 ASN B  98     -10.707  23.564 -67.974  1.00  0.00           H  
ATOM   3843 2HD2 ASN B  98      -9.580  22.257 -67.824  1.00  0.00           H  
ATOM   3844  N   GLU B  99      -8.810  20.192 -70.940  1.00  0.00           N  
ATOM   3845  CA  GLU B  99      -7.749  20.927 -71.674  1.00  0.00           C  
ATOM   3846  C   GLU B  99      -7.959  20.944 -73.203  1.00  0.00           C  
ATOM   3847  O   GLU B  99      -7.434  21.883 -73.850  1.00  0.00           O  
ATOM   3848  CB  GLU B  99      -6.382  20.316 -71.360  1.00  0.00           C  
ATOM   3849  CG  GLU B  99      -5.923  20.507 -69.921  1.00  0.00           C  
ATOM   3850  CD  GLU B  99      -6.526  19.505 -68.977  1.00  0.00           C  
ATOM   3851  OE1 GLU B  99      -7.252  18.653 -69.429  1.00  0.00           O  
ATOM   3852  OE2 GLU B  99      -6.259  19.591 -67.802  1.00  0.00           O  
ATOM   3853  H   GLU B  99      -8.569  19.346 -70.443  1.00  0.00           H  
ATOM   3854  HA  GLU B  99      -7.757  21.966 -71.344  1.00  0.00           H  
ATOM   3855 1HB  GLU B  99      -6.406  19.246 -71.564  1.00  0.00           H  
ATOM   3856 2HB  GLU B  99      -5.628  20.757 -72.013  1.00  0.00           H  
ATOM   3857 1HG  GLU B  99      -4.837  20.419 -69.883  1.00  0.00           H  
ATOM   3858 2HG  GLU B  99      -6.190  21.512 -69.596  1.00  0.00           H  
ATOM   3859  N   ILE B 100      -8.817  20.034 -73.732  1.00  0.00           N  
ATOM   3860  CA  ILE B 100      -9.180  19.901 -75.134  1.00  0.00           C  
ATOM   3861  C   ILE B 100     -10.695  20.135 -75.479  1.00  0.00           C  
ATOM   3862  O   ILE B 100     -11.093  19.962 -76.654  1.00  0.00           O  
ATOM   3863  CB  ILE B 100      -8.762  18.501 -75.620  1.00  0.00           C  
ATOM   3864  CG1 ILE B 100      -9.500  17.418 -74.828  1.00  0.00           C  
ATOM   3865  CG2 ILE B 100      -7.257  18.322 -75.497  1.00  0.00           C  
ATOM   3866  CD1 ILE B 100      -9.333  16.027 -75.395  1.00  0.00           C  
ATOM   3867  H   ILE B 100      -9.224  19.403 -73.056  1.00  0.00           H  
ATOM   3868  HA  ILE B 100      -8.643  20.659 -75.703  1.00  0.00           H  
ATOM   3869  HB  ILE B 100      -9.049  18.378 -76.664  1.00  0.00           H  
ATOM   3870 1HG1 ILE B 100      -9.142  17.413 -73.799  1.00  0.00           H  
ATOM   3871 2HG1 ILE B 100     -10.565  17.649 -74.801  1.00  0.00           H  
ATOM   3872 1HG2 ILE B 100      -6.979  17.327 -75.844  1.00  0.00           H  
ATOM   3873 2HG2 ILE B 100      -6.751  19.072 -76.103  1.00  0.00           H  
ATOM   3874 3HG2 ILE B 100      -6.960  18.438 -74.454  1.00  0.00           H  
ATOM   3875 1HD1 ILE B 100      -9.885  15.315 -74.780  1.00  0.00           H  
ATOM   3876 2HD1 ILE B 100      -9.719  16.000 -76.415  1.00  0.00           H  
ATOM   3877 3HD1 ILE B 100      -8.277  15.760 -75.398  1.00  0.00           H  
ATOM   3878  N   LYS B 101     -11.476  20.589 -74.518  1.00  0.00           N  
ATOM   3879  CA  LYS B 101     -12.882  20.771 -74.811  1.00  0.00           C  
ATOM   3880  C   LYS B 101     -13.141  21.895 -75.863  1.00  0.00           C  
ATOM   3881  O   LYS B 101     -12.578  23.050 -75.794  1.00  0.00           O  
ATOM   3882  CB  LYS B 101     -13.633  21.071 -73.513  1.00  0.00           C  
ATOM   3883  CG  LYS B 101     -13.775  19.878 -72.577  1.00  0.00           C  
ATOM   3884  CD  LYS B 101     -14.542  20.251 -71.317  1.00  0.00           C  
ATOM   3885  CE  LYS B 101     -14.690  19.058 -70.385  1.00  0.00           C  
ATOM   3886  NZ  LYS B 101     -15.348  19.432 -69.104  1.00  0.00           N  
ATOM   3887  H   LYS B 101     -11.133  20.811 -73.595  1.00  0.00           H  
ATOM   3888  HA  LYS B 101     -13.268  19.847 -75.243  1.00  0.00           H  
ATOM   3889 1HB  LYS B 101     -13.118  21.863 -72.969  1.00  0.00           H  
ATOM   3890 2HB  LYS B 101     -14.635  21.433 -73.747  1.00  0.00           H  
ATOM   3891 1HG  LYS B 101     -14.305  19.074 -73.090  1.00  0.00           H  
ATOM   3892 2HG  LYS B 101     -12.786  19.516 -72.297  1.00  0.00           H  
ATOM   3893 1HD  LYS B 101     -14.014  21.049 -70.793  1.00  0.00           H  
ATOM   3894 2HD  LYS B 101     -15.534  20.613 -71.589  1.00  0.00           H  
ATOM   3895 1HE  LYS B 101     -15.283  18.287 -70.873  1.00  0.00           H  
ATOM   3896 2HE  LYS B 101     -13.706  18.644 -70.165  1.00  0.00           H  
ATOM   3897 1HZ  LYS B 101     -15.427  18.615 -68.514  1.00  0.00           H  
ATOM   3898 2HZ  LYS B 101     -14.796  20.135 -68.633  1.00  0.00           H  
ATOM   3899 3HZ  LYS B 101     -16.270  19.800 -69.293  1.00  0.00           H  
ATOM   3900  N   SER B 102     -13.944  21.562 -76.884  1.00  0.00           N  
ATOM   3901  CA  SER B 102     -14.361  22.496 -77.962  1.00  0.00           C  
ATOM   3902  C   SER B 102     -13.098  23.186 -78.611  1.00  0.00           C  
ATOM   3903  O   SER B 102     -13.244  24.300 -79.077  1.00  0.00           O  
ATOM   3904  CB  SER B 102     -15.307  23.543 -77.405  1.00  0.00           C  
ATOM   3905  OG  SER B 102     -16.452  22.946 -76.862  1.00  0.00           O  
ATOM   3906  H   SER B 102     -14.276  20.608 -76.904  1.00  0.00           H  
ATOM   3907  HA  SER B 102     -14.882  21.926 -78.733  1.00  0.00           H  
ATOM   3908 1HB  SER B 102     -14.796  24.122 -76.637  1.00  0.00           H  
ATOM   3909 2HB  SER B 102     -15.594  24.232 -78.198  1.00  0.00           H  
ATOM   3910  HG  SER B 102     -16.828  23.593 -76.260  1.00  0.00           H  
ATOM   3911  N   LYS B 103     -11.913  22.588 -78.678  1.00  0.00           N  
ATOM   3912  CA  LYS B 103     -10.626  23.106 -79.300  1.00  0.00           C  
ATOM   3913  C   LYS B 103     -10.200  22.432 -80.570  1.00  0.00           C  
ATOM   3914  O   LYS B 103     -10.413  21.246 -80.707  1.00  0.00           O  
ATOM   3915  CB  LYS B 103      -9.466  22.994 -78.309  1.00  0.00           C  
ATOM   3916  CG  LYS B 103      -9.578  23.918 -77.104  1.00  0.00           C  
ATOM   3917  CD  LYS B 103      -8.348  23.816 -76.214  1.00  0.00           C  
ATOM   3918  CE  LYS B 103      -8.457  24.741 -75.010  1.00  0.00           C  
ATOM   3919  NZ  LYS B 103      -7.270  24.635 -74.118  1.00  0.00           N  
ATOM   3920  H   LYS B 103     -11.919  21.675 -78.247  1.00  0.00           H  
ATOM   3921  HA  LYS B 103     -10.763  24.157 -79.557  1.00  0.00           H  
ATOM   3922 1HB  LYS B 103      -9.399  21.970 -77.941  1.00  0.00           H  
ATOM   3923 2HB  LYS B 103      -8.529  23.220 -78.818  1.00  0.00           H  
ATOM   3924 1HG  LYS B 103      -9.686  24.949 -77.444  1.00  0.00           H  
ATOM   3925 2HG  LYS B 103     -10.460  23.652 -76.522  1.00  0.00           H  
ATOM   3926 1HD  LYS B 103      -8.235  22.789 -75.864  1.00  0.00           H  
ATOM   3927 2HD  LYS B 103      -7.461  24.085 -76.787  1.00  0.00           H  
ATOM   3928 1HE  LYS B 103      -8.549  25.771 -75.350  1.00  0.00           H  
ATOM   3929 2HE  LYS B 103      -9.349  24.489 -74.438  1.00  0.00           H  
ATOM   3930 1HZ  LYS B 103      -7.381  25.261 -73.333  1.00  0.00           H  
ATOM   3931 2HZ  LYS B 103      -7.185  23.686 -73.781  1.00  0.00           H  
ATOM   3932 3HZ  LYS B 103      -6.438  24.884 -74.632  1.00  0.00           H  
ATOM   3933  N   LYS B 104      -9.562  23.123 -81.486  1.00  0.00           N  
ATOM   3934  CA  LYS B 104      -9.139  22.680 -82.870  1.00  0.00           C  
ATOM   3935  C   LYS B 104      -7.653  22.280 -83.027  1.00  0.00           C  
ATOM   3936  O   LYS B 104      -6.777  22.444 -82.218  1.00  0.00           O  
ATOM   3937  CB  LYS B 104      -9.450  23.783 -83.883  1.00  0.00           C  
ATOM   3938  CG  LYS B 104     -10.932  24.098 -84.034  1.00  0.00           C  
ATOM   3939  CD  LYS B 104     -11.157  25.236 -85.018  1.00  0.00           C  
ATOM   3940  CE  LYS B 104     -12.639  25.544 -85.180  1.00  0.00           C  
ATOM   3941  NZ  LYS B 104     -12.874  26.660 -86.136  1.00  0.00           N  
ATOM   3942  H   LYS B 104      -9.349  24.062 -81.184  1.00  0.00           H  
ATOM   3943  HA  LYS B 104      -9.703  21.785 -83.135  1.00  0.00           H  
ATOM   3944 1HB  LYS B 104      -8.941  24.701 -83.588  1.00  0.00           H  
ATOM   3945 2HB  LYS B 104      -9.067  23.497 -84.862  1.00  0.00           H  
ATOM   3946 1HG  LYS B 104     -11.458  23.212 -84.390  1.00  0.00           H  
ATOM   3947 2HG  LYS B 104     -11.345  24.380 -83.065  1.00  0.00           H  
ATOM   3948 1HD  LYS B 104     -10.645  26.132 -84.663  1.00  0.00           H  
ATOM   3949 2HD  LYS B 104     -10.745  24.965 -85.989  1.00  0.00           H  
ATOM   3950 1HE  LYS B 104     -13.157  24.657 -85.541  1.00  0.00           H  
ATOM   3951 2HE  LYS B 104     -13.062  25.816 -84.213  1.00  0.00           H  
ATOM   3952 1HZ  LYS B 104     -13.866  26.833 -86.215  1.00  0.00           H  
ATOM   3953 2HZ  LYS B 104     -12.413  27.494 -85.801  1.00  0.00           H  
ATOM   3954 3HZ  LYS B 104     -12.503  26.412 -87.042  1.00  0.00           H  
ATOM   3955  N   LEU B 105      -7.411  21.699 -84.167  1.00  0.00           N  
ATOM   3956  CA  LEU B 105      -6.110  21.232 -84.787  1.00  0.00           C  
ATOM   3957  C   LEU B 105      -6.118  21.295 -86.340  1.00  0.00           C  
ATOM   3958  O   LEU B 105      -7.195  21.133 -86.961  1.00  0.00           O  
ATOM   3959  CB  LEU B 105      -5.805  19.794 -84.351  1.00  0.00           C  
ATOM   3960  CG  LEU B 105      -6.847  18.742 -84.753  1.00  0.00           C  
ATOM   3961  CD1 LEU B 105      -6.562  18.261 -86.170  1.00  0.00           C  
ATOM   3962  CD2 LEU B 105      -6.809  17.585 -83.765  1.00  0.00           C  
ATOM   3963  H   LEU B 105      -8.273  21.566 -84.675  1.00  0.00           H  
ATOM   3964  HA  LEU B 105      -5.308  21.883 -84.438  1.00  0.00           H  
ATOM   3965 1HB  LEU B 105      -4.850  19.495 -84.780  1.00  0.00           H  
ATOM   3966 2HB  LEU B 105      -5.715  19.771 -83.265  1.00  0.00           H  
ATOM   3967  HG  LEU B 105      -7.840  19.192 -84.747  1.00  0.00           H  
ATOM   3968 1HD1 LEU B 105      -7.303  17.514 -86.456  1.00  0.00           H  
ATOM   3969 2HD1 LEU B 105      -6.615  19.105 -86.858  1.00  0.00           H  
ATOM   3970 3HD1 LEU B 105      -5.567  17.820 -86.211  1.00  0.00           H  
ATOM   3971 1HD2 LEU B 105      -7.550  16.838 -84.051  1.00  0.00           H  
ATOM   3972 2HD2 LEU B 105      -5.817  17.134 -83.772  1.00  0.00           H  
ATOM   3973 3HD2 LEU B 105      -7.033  17.954 -82.764  1.00  0.00           H  
ATOM   3974  N   SER B 106      -4.938  21.416 -86.978  1.00  0.00           N  
ATOM   3975  CA  SER B 106      -4.811  21.462 -88.434  1.00  0.00           C  
ATOM   3976  C   SER B 106      -3.804  20.449 -88.995  1.00  0.00           C  
ATOM   3977  O   SER B 106      -2.896  20.011 -88.226  1.00  0.00           O  
ATOM   3978  CB  SER B 106      -4.407  22.860 -88.859  1.00  0.00           C  
ATOM   3979  OG  SER B 106      -5.448  23.772 -88.643  1.00  0.00           O  
ATOM   3980  H   SER B 106      -4.105  21.477 -86.409  1.00  0.00           H  
ATOM   3981  HA  SER B 106      -5.780  21.219 -88.874  1.00  0.00           H  
ATOM   3982 1HB  SER B 106      -3.526  23.170 -88.298  1.00  0.00           H  
ATOM   3983 2HB  SER B 106      -4.138  22.855 -89.915  1.00  0.00           H  
ATOM   3984  HG  SER B 106      -5.304  24.491 -89.262  1.00  0.00           H  
ATOM   3985  N   LEU B 107      -4.020  20.022 -90.222  1.00  0.00           N  
ATOM   3986  CA  LEU B 107      -3.107  19.203 -91.027  1.00  0.00           C  
ATOM   3987  C   LEU B 107      -2.589  20.033 -92.209  1.00  0.00           C  
ATOM   3988  O   LEU B 107      -3.426  20.690 -92.806  1.00  0.00           O  
ATOM   3989  CB  LEU B 107      -3.814  17.940 -91.535  1.00  0.00           C  
ATOM   3990  CG  LEU B 107      -4.592  17.143 -90.480  1.00  0.00           C  
ATOM   3991  CD1 LEU B 107      -5.287  15.963 -91.146  1.00  0.00           C  
ATOM   3992  CD2 LEU B 107      -3.637  16.674 -89.393  1.00  0.00           C  
ATOM   3993  H   LEU B 107      -4.907  20.302 -90.616  1.00  0.00           H  
ATOM   3994  HA  LEU B 107      -2.269  18.901 -90.399  1.00  0.00           H  
ATOM   3995 1HB  LEU B 107      -4.516  18.227 -92.317  1.00  0.00           H  
ATOM   3996 2HB  LEU B 107      -3.069  17.275 -91.971  1.00  0.00           H  
ATOM   3997  HG  LEU B 107      -5.361  17.777 -90.039  1.00  0.00           H  
ATOM   3998 1HD1 LEU B 107      -5.839  15.396 -90.396  1.00  0.00           H  
ATOM   3999 2HD1 LEU B 107      -5.978  16.328 -91.905  1.00  0.00           H  
ATOM   4000 3HD1 LEU B 107      -4.542  15.318 -91.611  1.00  0.00           H  
ATOM   4001 1HD2 LEU B 107      -4.190  16.107 -88.643  1.00  0.00           H  
ATOM   4002 2HD2 LEU B 107      -2.868  16.038 -89.833  1.00  0.00           H  
ATOM   4003 3HD2 LEU B 107      -3.168  17.538 -88.923  1.00  0.00           H  
ATOM   4004  N   TRP B 108      -1.267  20.129 -92.463  1.00  0.00           N  
ATOM   4005  CA  TRP B 108      -0.750  20.925 -93.569  1.00  0.00           C  
ATOM   4006  C   TRP B 108       0.634  20.414 -94.015  1.00  0.00           C  
ATOM   4007  O   TRP B 108       1.172  19.544 -93.277  1.00  0.00           O  
ATOM   4008  CB  TRP B 108      -0.658  22.397 -93.162  1.00  0.00           C  
ATOM   4009  CG  TRP B 108       0.407  22.671 -92.144  1.00  0.00           C  
ATOM   4010  CD1 TRP B 108       1.674  23.110 -92.388  1.00  0.00           C  
ATOM   4011  CD2 TRP B 108       0.303  22.525 -90.707  1.00  0.00           C  
ATOM   4012  NE1 TRP B 108       2.362  23.246 -91.208  1.00  0.00           N  
ATOM   4013  CE2 TRP B 108       1.538  22.893 -90.169  1.00  0.00           C  
ATOM   4014  CE3 TRP B 108      -0.725  22.118 -89.847  1.00  0.00           C  
ATOM   4015  CZ2 TRP B 108       1.782  22.867 -88.805  1.00  0.00           C  
ATOM   4016  CZ3 TRP B 108      -0.482  22.093 -88.479  1.00  0.00           C  
ATOM   4017  CH2 TRP B 108       0.740  22.459 -87.972  1.00  0.00           C  
ATOM   4018  H   TRP B 108      -0.618  19.634 -91.868  1.00  0.00           H  
ATOM   4019  HA  TRP B 108      -1.438  20.835 -94.410  1.00  0.00           H  
ATOM   4020 1HB  TRP B 108      -0.455  23.006 -94.043  1.00  0.00           H  
ATOM   4021 2HB  TRP B 108      -1.615  22.721 -92.753  1.00  0.00           H  
ATOM   4022  HD1 TRP B 108       2.080  23.322 -93.375  1.00  0.00           H  
ATOM   4023  HE1 TRP B 108       3.320  23.554 -91.118  1.00  0.00           H  
ATOM   4024  HE3 TRP B 108      -1.698  21.829 -90.244  1.00  0.00           H  
ATOM   4025  HZ2 TRP B 108       2.745  23.154 -88.382  1.00  0.00           H  
ATOM   4026  HZ3 TRP B 108      -1.287  21.774 -87.817  1.00  0.00           H  
ATOM   4027  HH2 TRP B 108       0.897  22.428 -86.894  1.00  0.00           H  
ATOM   4028  N   ALA B 109       1.171  20.916 -95.116  1.00  0.00           N  
ATOM   4029  CA  ALA B 109       2.442  20.498 -95.703  1.00  0.00           C  
ATOM   4030  C   ALA B 109       3.109  21.750 -96.381  1.00  0.00           C  
ATOM   4031  O   ALA B 109       2.425  22.759 -96.734  1.00  0.00           O  
ATOM   4032  CB  ALA B 109       2.142  19.416 -96.683  1.00  0.00           C  
ATOM   4033  H   ALA B 109       0.637  21.645 -95.567  1.00  0.00           H  
ATOM   4034  HA  ALA B 109       3.084  20.140 -94.898  1.00  0.00           H  
ATOM   4035 1HB  ALA B 109       3.070  19.076 -97.144  1.00  0.00           H  
ATOM   4036 2HB  ALA B 109       1.666  18.581 -96.169  1.00  0.00           H  
ATOM   4037 3HB  ALA B 109       1.473  19.797 -97.452  1.00  0.00           H  
ATOM   4038  N   LYS B 110       4.439  21.770 -96.442  1.00  0.00           N  
ATOM   4039  CA  LYS B 110       5.335  22.798 -97.017  1.00  0.00           C  
ATOM   4040  C   LYS B 110       6.561  22.150 -97.622  1.00  0.00           C  
ATOM   4041  O   LYS B 110       7.169  21.211 -97.096  1.00  0.00           O  
ATOM   4042  CB  LYS B 110       5.756  23.819 -95.960  1.00  0.00           C  
ATOM   4043  CG  LYS B 110       6.598  24.969 -96.496  1.00  0.00           C  
ATOM   4044  CD  LYS B 110       6.834  26.027 -95.428  1.00  0.00           C  
ATOM   4045  CE  LYS B 110       7.706  27.159 -95.952  1.00  0.00           C  
ATOM   4046  NZ  LYS B 110       7.901  28.227 -94.934  1.00  0.00           N  
ATOM   4047  H   LYS B 110       4.842  20.945 -96.022  1.00  0.00           H  
ATOM   4048  HA  LYS B 110       4.796  23.324 -97.806  1.00  0.00           H  
ATOM   4049 1HB  LYS B 110       4.868  24.245 -95.491  1.00  0.00           H  
ATOM   4050 2HB  LYS B 110       6.331  23.320 -95.180  1.00  0.00           H  
ATOM   4051 1HG  LYS B 110       7.561  24.587 -96.837  1.00  0.00           H  
ATOM   4052 2HG  LYS B 110       6.089  25.428 -97.344  1.00  0.00           H  
ATOM   4053 1HD  LYS B 110       5.876  26.436 -95.104  1.00  0.00           H  
ATOM   4054 2HD  LYS B 110       7.325  25.571 -94.568  1.00  0.00           H  
ATOM   4055 1HE  LYS B 110       8.679  26.765 -96.239  1.00  0.00           H  
ATOM   4056 2HE  LYS B 110       7.241  27.597 -96.835  1.00  0.00           H  
ATOM   4057 1HZ  LYS B 110       8.483  28.957 -95.320  1.00  0.00           H  
ATOM   4058 2HZ  LYS B 110       7.004  28.613 -94.674  1.00  0.00           H  
ATOM   4059 3HZ  LYS B 110       8.349  27.837 -94.118  1.00  0.00           H  
ATOM   4060  N   ARG B 111       6.974  22.673 -98.858  1.00  0.00           N  
ATOM   4061  CA  ARG B 111       8.124  22.165 -99.679  1.00  0.00           C  
ATOM   4062  C   ARG B 111       9.501  22.254 -98.958  1.00  0.00           C  
ATOM   4063  O   ARG B 111       9.872  23.293 -98.481  1.00  0.00           O  
ATOM   4064  CB  ARG B 111       8.213  22.939-100.986  1.00  0.00           C  
ATOM   4065  CG  ARG B 111       9.270  22.437-101.956  1.00  0.00           C  
ATOM   4066  CD  ARG B 111       9.241  23.188-103.238  1.00  0.00           C  
ATOM   4067  NE  ARG B 111      10.269  22.730-104.158  1.00  0.00           N  
ATOM   4068  CZ  ARG B 111      10.452  23.214-105.402  1.00  0.00           C  
ATOM   4069  NH1 ARG B 111       9.671  24.168-105.858  1.00  0.00           N  
ATOM   4070  NH2 ARG B 111      11.417  22.729-106.164  1.00  0.00           N  
ATOM   4071  H   ARG B 111       6.435  23.456 -99.198  1.00  0.00           H  
ATOM   4072  HA  ARG B 111       7.951  21.113 -99.904  1.00  0.00           H  
ATOM   4073 1HB  ARG B 111       7.252  22.901-101.497  1.00  0.00           H  
ATOM   4074 2HB  ARG B 111       8.430  23.987-100.775  1.00  0.00           H  
ATOM   4075 1HG  ARG B 111      10.258  22.556-101.511  1.00  0.00           H  
ATOM   4076 2HG  ARG B 111       9.094  21.383-102.173  1.00  0.00           H  
ATOM   4077 1HD  ARG B 111       8.271  23.055-103.715  1.00  0.00           H  
ATOM   4078 2HD  ARG B 111       9.406  24.247-103.042  1.00  0.00           H  
ATOM   4079  HE  ARG B 111      10.889  21.996-103.843  1.00  0.00           H  
ATOM   4080 1HH1 ARG B 111       8.934  24.539-105.276  1.00  0.00           H  
ATOM   4081 2HH1 ARG B 111       9.809  24.531-106.791  1.00  0.00           H  
ATOM   4082 1HH2 ARG B 111      12.018  21.996-105.814  1.00  0.00           H  
ATOM   4083 2HH2 ARG B 111      11.555  23.092-107.096  1.00  0.00           H  
ATOM   4084  N   GLN B 112      10.318  21.208 -99.046  1.00  0.00           N  
ATOM   4085  CA  GLN B 112      11.605  21.178 -98.404  1.00  0.00           C  
ATOM   4086  C   GLN B 112      12.659  20.952 -99.450  1.00  0.00           C  
ATOM   4087  O   GLN B 112      12.485  21.282-100.662  1.00  0.00           O  
ATOM   4088  CB  GLN B 112      11.667  20.084 -97.335  1.00  0.00           C  
ATOM   4089  CG  GLN B 112      10.758  20.328 -96.142  1.00  0.00           C  
ATOM   4090  CD  GLN B 112      11.216  21.501 -95.296  1.00  0.00           C  
ATOM   4091  OE1 GLN B 112      12.417  21.711 -95.099  1.00  0.00           O  
ATOM   4092  NE2 GLN B 112      10.262  22.273 -94.789  1.00  0.00           N  
ATOM   4093  H   GLN B 112      10.017  20.408 -99.584  1.00  0.00           H  
ATOM   4094  HA  GLN B 112      11.773  22.140 -97.920  1.00  0.00           H  
ATOM   4095 1HB  GLN B 112      11.391  19.127 -97.777  1.00  0.00           H  
ATOM   4096 2HB  GLN B 112      12.688  19.992 -96.966  1.00  0.00           H  
ATOM   4097 1HG  GLN B 112       9.751  20.540 -96.502  1.00  0.00           H  
ATOM   4098 2HG  GLN B 112      10.751  19.437 -95.515  1.00  0.00           H  
ATOM   4099 1HE2 GLN B 112      10.504  23.062 -94.223  1.00  0.00           H  
ATOM   4100 2HE2 GLN B 112       9.301  22.066 -94.973  1.00  0.00           H  
ATOM   4101  N   ASN B 113      13.819  20.433 -99.149  1.00  0.00           N  
ATOM   4102  CA  ASN B 113      14.820  20.221-100.157  1.00  0.00           C  
ATOM   4103  C   ASN B 113      14.461  19.030-101.098  1.00  0.00           C  
ATOM   4104  O   ASN B 113      15.015  18.849-102.162  1.00  0.00           O  
ATOM   4105  CB  ASN B 113      16.168  20.011 -99.494  1.00  0.00           C  
ATOM   4106  CG  ASN B 113      16.736  21.282 -98.926  1.00  0.00           C  
ATOM   4107  OD1 ASN B 113      16.551  22.367 -99.490  1.00  0.00           O  
ATOM   4108  ND2 ASN B 113      17.425  21.170 -97.818  1.00  0.00           N  
ATOM   4109  H   ASN B 113      14.021  20.175 -98.194  1.00  0.00           H  
ATOM   4110  HA  ASN B 113      14.866  21.108-100.791  1.00  0.00           H  
ATOM   4111 1HB  ASN B 113      16.070  19.280 -98.691  1.00  0.00           H  
ATOM   4112 2HB  ASN B 113      16.872  19.606-100.221  1.00  0.00           H  
ATOM   4113 1HD2 ASN B 113      17.826  21.982 -97.394  1.00  0.00           H  
ATOM   4114 2HD2 ASN B 113      17.549  20.273 -97.396  1.00  0.00           H  
ATOM   4115  N   GLY B 114      13.468  18.293-100.637  1.00  0.00           N  
ATOM   4116  CA  GLY B 114      12.819  17.237-101.442  1.00  0.00           C  
ATOM   4117  C   GLY B 114      11.559  17.591-102.144  1.00  0.00           C  
ATOM   4118  O   GLY B 114      11.440  18.695-102.631  1.00  0.00           O  
ATOM   4119  H   GLY B 114      13.145  18.463 -99.695  1.00  0.00           H  
ATOM   4120 1HA  GLY B 114      13.510  16.886-102.208  1.00  0.00           H  
ATOM   4121 2HA  GLY B 114      12.587  16.385-100.805  1.00  0.00           H  
ATOM   4122  N   SER B 115      10.576  16.654-102.269  1.00  0.00           N  
ATOM   4123  CA  SER B 115       9.245  16.801-102.806  1.00  0.00           C  
ATOM   4124  C   SER B 115       8.306  17.703-101.933  1.00  0.00           C  
ATOM   4125  O   SER B 115       7.918  18.790-102.423  1.00  0.00           O  
ATOM   4126  CB  SER B 115       8.638  15.421-102.968  1.00  0.00           C  
ATOM   4127  OG  SER B 115       7.332  15.502-103.469  1.00  0.00           O  
ATOM   4128  H   SER B 115      10.871  15.752-101.925  1.00  0.00           H  
ATOM   4129  HA  SER B 115       9.316  17.286-103.780  1.00  0.00           H  
ATOM   4130 1HB  SER B 115       9.254  14.830-103.645  1.00  0.00           H  
ATOM   4131 2HB  SER B 115       8.630  14.912-102.005  1.00  0.00           H  
ATOM   4132  HG  SER B 115       7.147  16.438-103.576  1.00  0.00           H  
ATOM   4133  N   VAL B 116       7.967  17.332-100.677  1.00  0.00           N  
ATOM   4134  CA  VAL B 116       7.210  18.111 -99.710  1.00  0.00           C  
ATOM   4135  C   VAL B 116       7.140  17.460 -98.296  1.00  0.00           C  
ATOM   4136  O   VAL B 116       6.901  16.258 -98.330  1.00  0.00           O  
ATOM   4137  CB  VAL B 116       5.782  18.322-100.245  1.00  0.00           C  
ATOM   4138  CG1 VAL B 116       5.053  16.991-100.360  1.00  0.00           C  
ATOM   4139  CG2 VAL B 116       5.023  19.276 -99.334  1.00  0.00           C  
ATOM   4140  H   VAL B 116       8.291  16.411-100.421  1.00  0.00           H  
ATOM   4141  HA  VAL B 116       7.698  19.079 -99.588  1.00  0.00           H  
ATOM   4142  HB  VAL B 116       5.838  18.745-101.249  1.00  0.00           H  
ATOM   4143 1HG1 VAL B 116       4.045  17.160-100.740  1.00  0.00           H  
ATOM   4144 2HG1 VAL B 116       5.594  16.338-101.044  1.00  0.00           H  
ATOM   4145 3HG1 VAL B 116       4.997  16.522 -99.378  1.00  0.00           H  
ATOM   4146 1HG2 VAL B 116       4.014  19.421 -99.719  1.00  0.00           H  
ATOM   4147 2HG2 VAL B 116       4.972  18.855 -98.330  1.00  0.00           H  
ATOM   4148 3HG2 VAL B 116       5.540  20.235 -99.300  1.00  0.00           H  
ATOM   4149  N   LYS B 117       7.283  18.229 -97.197  1.00  0.00           N  
ATOM   4150  CA  LYS B 117       7.151  17.670 -95.854  1.00  0.00           C  
ATOM   4151  C   LYS B 117       5.757  17.939 -95.253  1.00  0.00           C  
ATOM   4152  O   LYS B 117       5.494  19.161 -95.080  1.00  0.00           O  
ATOM   4153  CB  LYS B 117       8.238  18.238 -94.940  1.00  0.00           C  
ATOM   4154  CG  LYS B 117       8.238  17.663 -93.530  1.00  0.00           C  
ATOM   4155  CD  LYS B 117       9.408  18.196 -92.716  1.00  0.00           C  
ATOM   4156  CE  LYS B 117       9.400  17.635 -91.302  1.00  0.00           C  
ATOM   4157  NZ  LYS B 117      10.557  18.123 -90.503  1.00  0.00           N  
ATOM   4158  H   LYS B 117       7.485  19.213 -97.303  1.00  0.00           H  
ATOM   4159  HA  LYS B 117       7.273  16.588 -95.916  1.00  0.00           H  
ATOM   4160 1HB  LYS B 117       9.218  18.049 -95.379  1.00  0.00           H  
ATOM   4161 2HB  LYS B 117       8.118  19.319 -94.861  1.00  0.00           H  
ATOM   4162 1HG  LYS B 117       7.306  17.928 -93.029  1.00  0.00           H  
ATOM   4163 2HG  LYS B 117       8.306  16.577 -93.581  1.00  0.00           H  
ATOM   4164 1HD  LYS B 117      10.345  17.920 -93.202  1.00  0.00           H  
ATOM   4165 2HD  LYS B 117       9.351  19.283 -92.666  1.00  0.00           H  
ATOM   4166 1HE  LYS B 117       8.478  17.927 -90.800  1.00  0.00           H  
ATOM   4167 2HE  LYS B 117       9.436  16.546 -91.342  1.00  0.00           H  
ATOM   4168 1HZ  LYS B 117      10.515  17.729 -89.574  1.00  0.00           H  
ATOM   4169 2HZ  LYS B 117      11.418  17.841 -90.950  1.00  0.00           H  
ATOM   4170 3HZ  LYS B 117      10.524  19.130 -90.443  1.00  0.00           H  
ATOM   4171  N   TRP B 118       4.995  16.902 -94.849  1.00  0.00           N  
ATOM   4172  CA  TRP B 118       3.614  16.929 -94.233  1.00  0.00           C  
ATOM   4173  C   TRP B 118       3.740  17.175 -92.722  1.00  0.00           C  
ATOM   4174  O   TRP B 118       4.629  16.626 -92.050  1.00  0.00           O  
ATOM   4175  CB  TRP B 118       2.864  15.618 -94.477  1.00  0.00           C  
ATOM   4176  CG  TRP B 118       1.440  15.647 -94.011  1.00  0.00           C  
ATOM   4177  CD1 TRP B 118       0.394  16.267 -94.625  1.00  0.00           C  
ATOM   4178  CD2 TRP B 118       0.896  15.024 -92.822  1.00  0.00           C  
ATOM   4179  NE1 TRP B 118      -0.759  16.076 -93.904  1.00  0.00           N  
ATOM   4180  CE2 TRP B 118      -0.470  15.316 -92.798  1.00  0.00           C  
ATOM   4181  CE3 TRP B 118       1.450  14.254 -91.792  1.00  0.00           C  
ATOM   4182  CZ2 TRP B 118      -1.299  14.868 -91.781  1.00  0.00           C  
ATOM   4183  CZ3 TRP B 118       0.619  13.803 -90.773  1.00  0.00           C  
ATOM   4184  CH2 TRP B 118      -0.720  14.102 -90.769  1.00  0.00           C  
ATOM   4185  H   TRP B 118       5.450  16.013 -94.999  1.00  0.00           H  
ATOM   4186  HA  TRP B 118       3.044  17.736 -94.695  1.00  0.00           H  
ATOM   4187 1HB  TRP B 118       2.871  15.387 -95.542  1.00  0.00           H  
ATOM   4188 2HB  TRP B 118       3.377  14.805 -93.963  1.00  0.00           H  
ATOM   4189  HD1 TRP B 118       0.462  16.831 -95.553  1.00  0.00           H  
ATOM   4190  HE1 TRP B 118      -1.671  16.436 -94.146  1.00  0.00           H  
ATOM   4191  HE3 TRP B 118       2.512  14.011 -91.792  1.00  0.00           H  
ATOM   4192  HZ2 TRP B 118      -2.365  15.095 -91.760  1.00  0.00           H  
ATOM   4193  HZ3 TRP B 118       1.059  13.204 -89.975  1.00  0.00           H  
ATOM   4194  HH2 TRP B 118      -1.343  13.731 -89.955  1.00  0.00           H  
ATOM   4195  N   PHE B 119       2.897  18.040 -92.129  1.00  0.00           N  
ATOM   4196  CA  PHE B 119       2.886  18.453 -90.665  1.00  0.00           C  
ATOM   4197  C   PHE B 119       1.501  18.215 -90.049  1.00  0.00           C  
ATOM   4198  O   PHE B 119       0.504  17.969 -90.720  1.00  0.00           O  
ATOM   4199  CB  PHE B 119       3.260  19.927 -90.498  1.00  0.00           C  
ATOM   4200  CG  PHE B 119       4.584  20.288 -91.108  1.00  0.00           C  
ATOM   4201  CD1 PHE B 119       4.649  20.858 -92.371  1.00  0.00           C  
ATOM   4202  CD2 PHE B 119       5.767  20.060 -90.422  1.00  0.00           C  
ATOM   4203  CE1 PHE B 119       5.866  21.192 -92.934  1.00  0.00           C  
ATOM   4204  CE2 PHE B 119       6.985  20.393 -90.981  1.00  0.00           C  
ATOM   4205  CZ  PHE B 119       7.034  20.959 -92.239  1.00  0.00           C  
ATOM   4206  H   PHE B 119       2.213  18.437 -92.757  1.00  0.00           H  
ATOM   4207  HA  PHE B 119       3.622  17.851 -90.130  1.00  0.00           H  
ATOM   4208 1HB  PHE B 119       2.493  20.551 -90.954  1.00  0.00           H  
ATOM   4209 2HB  PHE B 119       3.295  20.175 -89.438  1.00  0.00           H  
ATOM   4210  HD1 PHE B 119       3.725  21.043 -92.920  1.00  0.00           H  
ATOM   4211  HD2 PHE B 119       5.728  19.612 -89.428  1.00  0.00           H  
ATOM   4212  HE1 PHE B 119       5.903  21.638 -93.927  1.00  0.00           H  
ATOM   4213  HE2 PHE B 119       7.907  20.208 -90.431  1.00  0.00           H  
ATOM   4214  HZ  PHE B 119       7.994  21.221 -92.682  1.00  0.00           H  
ATOM   4215  N   CYS B 120       1.431  18.196 -88.725  1.00  0.00           N  
ATOM   4216  CA  CYS B 120       0.194  17.980 -87.958  1.00  0.00           C  
ATOM   4217  C   CYS B 120       0.290  18.555 -86.507  1.00  0.00           C  
ATOM   4218  O   CYS B 120       1.239  18.324 -85.786  1.00  0.00           O  
ATOM   4219  CB  CYS B 120      -0.125  16.486 -87.892  1.00  0.00           C  
ATOM   4220  SG  CYS B 120      -1.640  16.093 -86.986  1.00  0.00           S  
ATOM   4221  H   CYS B 120       2.298  18.341 -88.229  1.00  0.00           H  
ATOM   4222  HA  CYS B 120      -0.623  18.493 -88.466  1.00  0.00           H  
ATOM   4223 1HB  CYS B 120      -0.224  16.090 -88.902  1.00  0.00           H  
ATOM   4224 2HB  CYS B 120       0.701  15.959 -87.413  1.00  0.00           H  
ATOM   4225  HG  CYS B 120      -1.790  14.871 -87.489  1.00  0.00           H  
ATOM   4226  N   GLY B 121      -0.718  19.396 -86.121  1.00  0.00           N  
ATOM   4227  CA  GLY B 121      -0.707  19.968 -84.786  1.00  0.00           C  
ATOM   4228  C   GLY B 121      -1.684  21.166 -84.618  1.00  0.00           C  
ATOM   4229  O   GLY B 121      -2.933  20.999 -84.833  1.00  0.00           O  
ATOM   4230  H   GLY B 121      -1.474  19.628 -86.750  1.00  0.00           H  
ATOM   4231 1HA  GLY B 121      -0.972  19.200 -84.059  1.00  0.00           H  
ATOM   4232 2HA  GLY B 121       0.300  20.305 -84.544  1.00  0.00           H  
ATOM   4233  N   GLN B 122      -1.240  22.327 -84.148  1.00  0.00           N  
ATOM   4234  CA  GLN B 122      -2.115  23.534 -83.793  1.00  0.00           C  
ATOM   4235  C   GLN B 122      -2.829  24.175 -85.066  1.00  0.00           C  
ATOM   4236  O   GLN B 122      -2.259  24.150 -86.168  1.00  0.00           O  
ATOM   4237  CB  GLN B 122      -1.276  24.602 -83.087  1.00  0.00           C  
ATOM   4238  CG  GLN B 122      -0.736  24.175 -81.733  1.00  0.00           C  
ATOM   4239  CD  GLN B 122       0.052  25.277 -81.051  1.00  0.00           C  
ATOM   4240  OE1 GLN B 122      -0.175  26.465 -81.295  1.00  0.00           O  
ATOM   4241  NE2 GLN B 122       0.985  24.889 -80.189  1.00  0.00           N  
ATOM   4242  H   GLN B 122      -0.240  22.390 -84.024  1.00  0.00           H  
ATOM   4243  HA  GLN B 122      -2.904  23.203 -83.118  1.00  0.00           H  
ATOM   4244 1HB  GLN B 122      -0.429  24.874 -83.717  1.00  0.00           H  
ATOM   4245 2HB  GLN B 122      -1.877  25.499 -82.942  1.00  0.00           H  
ATOM   4246 1HG  GLN B 122      -1.573  23.904 -81.089  1.00  0.00           H  
ATOM   4247 2HG  GLN B 122      -0.077  23.318 -81.870  1.00  0.00           H  
ATOM   4248 1HE2 GLN B 122       1.538  25.571 -79.708  1.00  0.00           H  
ATOM   4249 2HE2 GLN B 122       1.137  23.915 -80.020  1.00  0.00           H  
ATOM   4250  N   PRO B 123      -4.027  24.851 -84.877  1.00  0.00           N  
ATOM   4251  CA  PRO B 123      -4.790  25.576 -85.859  1.00  0.00           C  
ATOM   4252  C   PRO B 123      -4.033  26.605 -86.663  1.00  0.00           C  
ATOM   4253  O   PRO B 123      -3.493  27.590 -86.210  1.00  0.00           O  
ATOM   4254  CB  PRO B 123      -5.856  26.246 -84.986  1.00  0.00           C  
ATOM   4255  CG  PRO B 123      -6.053  25.295 -83.855  1.00  0.00           C  
ATOM   4256  CD  PRO B 123      -4.673  24.771 -83.562  1.00  0.00           C  
ATOM   4257  HA  PRO B 123      -5.236  24.864 -86.568  1.00  0.00           H  
ATOM   4258 1HB  PRO B 123      -5.505  27.235 -84.656  1.00  0.00           H  
ATOM   4259 2HB  PRO B 123      -6.773  26.409 -85.571  1.00  0.00           H  
ATOM   4260 1HG  PRO B 123      -6.500  25.816 -82.995  1.00  0.00           H  
ATOM   4261 2HG  PRO B 123      -6.755  24.500 -84.145  1.00  0.00           H  
ATOM   4262 1HD  PRO B 123      -4.180  25.425 -82.827  1.00  0.00           H  
ATOM   4263 2HD  PRO B 123      -4.744  23.742 -83.179  1.00  0.00           H  
ATOM   4264  N   VAL B 124      -3.969  26.318 -87.939  1.00  0.00           N  
ATOM   4265  CA  VAL B 124      -3.336  27.154 -88.982  1.00  0.00           C  
ATOM   4266  C   VAL B 124      -4.190  26.991 -90.229  1.00  0.00           C  
ATOM   4267  O   VAL B 124      -4.951  26.033 -90.329  1.00  0.00           O  
ATOM   4268  CB  VAL B 124      -1.886  26.720 -89.267  1.00  0.00           C  
ATOM   4269  CG1 VAL B 124      -1.033  26.854 -88.014  1.00  0.00           C  
ATOM   4270  CG2 VAL B 124      -1.865  25.289 -89.782  1.00  0.00           C  
ATOM   4271  H   VAL B 124      -4.399  25.443 -88.204  1.00  0.00           H  
ATOM   4272  HA  VAL B 124      -3.314  28.186 -88.632  1.00  0.00           H  
ATOM   4273  HB  VAL B 124      -1.459  27.384 -90.019  1.00  0.00           H  
ATOM   4274 1HG1 VAL B 124      -0.012  26.543 -88.234  1.00  0.00           H  
ATOM   4275 2HG1 VAL B 124      -1.033  27.893 -87.684  1.00  0.00           H  
ATOM   4276 3HG1 VAL B 124      -1.442  26.222 -87.226  1.00  0.00           H  
ATOM   4277 1HG2 VAL B 124      -0.837  24.989 -89.983  1.00  0.00           H  
ATOM   4278 2HG2 VAL B 124      -2.298  24.626 -89.033  1.00  0.00           H  
ATOM   4279 3HG2 VAL B 124      -2.447  25.225 -90.702  1.00  0.00           H  
ATOM   4280  N   THR B 125      -4.064  27.878 -91.212  1.00  0.00           N  
ATOM   4281  CA  THR B 125      -4.708  27.776 -92.481  1.00  0.00           C  
ATOM   4282  C   THR B 125      -3.979  28.528 -93.660  1.00  0.00           C  
ATOM   4283  O   THR B 125      -3.379  29.570 -93.463  1.00  0.00           O  
ATOM   4284  CB  THR B 125      -6.153  28.288 -92.342  1.00  0.00           C  
ATOM   4285  OG1 THR B 125      -6.871  28.037 -93.557  1.00  0.00           O  
ATOM   4286  CG2 THR B 125      -6.165  29.781 -92.051  1.00  0.00           C  
ATOM   4287  H   THR B 125      -3.467  28.671 -91.026  1.00  0.00           H  
ATOM   4288  HA  THR B 125      -4.719  26.727 -92.780  1.00  0.00           H  
ATOM   4289  HB  THR B 125      -6.649  27.761 -91.527  1.00  0.00           H  
ATOM   4290  HG1 THR B 125      -6.469  28.532 -94.274  1.00  0.00           H  
ATOM   4291 1HG2 THR B 125      -7.194  30.125 -91.955  1.00  0.00           H  
ATOM   4292 2HG2 THR B 125      -5.629  29.974 -91.121  1.00  0.00           H  
ATOM   4293 3HG2 THR B 125      -5.679  30.314 -92.866  1.00  0.00           H  
ATOM   4294  N   ARG B 126      -4.067  27.940 -94.936  1.00  0.00           N  
ATOM   4295  CA  ARG B 126      -3.415  28.490 -96.107  1.00  0.00           C  
ATOM   4296  C   ARG B 126      -4.191  29.655 -96.708  1.00  0.00           C  
ATOM   4297  O   ARG B 126      -5.413  29.547 -96.738  1.00  0.00           O  
ATOM   4298  CB  ARG B 126      -2.819  27.441 -97.036  1.00  0.00           C  
ATOM   4299  CG  ARG B 126      -2.160  27.953 -98.229  1.00  0.00           C  
ATOM   4300  CD  ARG B 126      -1.492  26.900 -99.202  1.00  0.00           C  
ATOM   4301  NE  ARG B 126      -0.358  26.226 -98.525  1.00  0.00           N  
ATOM   4302  CZ  ARG B 126      -0.373  24.921 -98.173  1.00  0.00           C  
ATOM   4303  NH1 ARG B 126      -1.399  24.133 -98.070  1.00  0.00           N  
ATOM   4304  NH2 ARG B 126       0.733  24.499 -97.685  1.00  0.00           N  
ATOM   4305  H   ARG B 126      -4.614  27.096 -95.028  1.00  0.00           H  
ATOM   4306  HA  ARG B 126      -2.432  28.860 -95.814  1.00  0.00           H  
ATOM   4307 1HB  ARG B 126      -2.083  26.850 -96.493  1.00  0.00           H  
ATOM   4308 2HB  ARG B 126      -3.603  26.762 -97.369  1.00  0.00           H  
ATOM   4309 1HG  ARG B 126      -2.883  28.492 -98.841  1.00  0.00           H  
ATOM   4310 2HG  ARG B 126      -1.355  28.629 -97.939  1.00  0.00           H  
ATOM   4311 1HD  ARG B 126      -2.230  26.153 -99.491  1.00  0.00           H  
ATOM   4312 2HD  ARG B 126      -1.124  27.409-100.092  1.00  0.00           H  
ATOM   4313  HE  ARG B 126       0.464  26.779 -98.321  1.00  0.00           H  
ATOM   4314 1HH1 ARG B 126      -2.327  24.484 -98.266  1.00  0.00           H  
ATOM   4315 2HH1 ARG B 126      -1.271  23.170 -97.795  1.00  0.00           H  
ATOM   4316 1HH2 ARG B 126       1.518  25.130 -97.593  1.00  0.00           H  
ATOM   4317 2HH2 ARG B 126       0.821  23.538 -97.392  1.00  0.00           H  
ATOM   4318  N   THR B 127      -3.500  30.688 -97.127  1.00  0.00           N  
ATOM   4319  CA  THR B 127      -4.103  31.838 -97.840  1.00  0.00           C  
ATOM   4320  C   THR B 127      -4.641  31.613 -99.283  1.00  0.00           C  
ATOM   4321  O   THR B 127      -5.684  32.161 -99.622  1.00  0.00           O  
ATOM   4322  CB  THR B 127      -3.078  32.986 -97.889  1.00  0.00           C  
ATOM   4323  OG1 THR B 127      -2.752  33.397 -96.555  1.00  0.00           O  
ATOM   4324  CG2 THR B 127      -3.642  34.172 -98.657  1.00  0.00           C  
ATOM   4325  H   THR B 127      -2.506  30.687 -96.947  1.00  0.00           H  
ATOM   4326  HA  THR B 127      -4.985  32.163 -97.288  1.00  0.00           H  
ATOM   4327  HB  THR B 127      -2.169  32.641 -98.381  1.00  0.00           H  
ATOM   4328  HG1 THR B 127      -2.671  34.353 -96.526  1.00  0.00           H  
ATOM   4329 1HG2 THR B 127      -2.904  34.974 -98.682  1.00  0.00           H  
ATOM   4330 2HG2 THR B 127      -3.880  33.866 -99.675  1.00  0.00           H  
ATOM   4331 3HG2 THR B 127      -4.546  34.527 -98.164  1.00  0.00           H  
ATOM   4332  N   THR B 128      -3.908  30.928-100.105  1.00  0.00           N  
ATOM   4333  CA  THR B 128      -4.230  30.562-101.502  1.00  0.00           C  
ATOM   4334  C   THR B 128      -3.644  29.249-102.016  1.00  0.00           C  
ATOM   4335  O   THR B 128      -2.552  28.869-101.598  1.00  0.00           O  
ATOM   4336  CB  THR B 128      -3.783  31.687-102.454  1.00  0.00           C  
ATOM   4337  OG1 THR B 128      -4.245  31.405-103.782  1.00  0.00           O  
ATOM   4338  CG2 THR B 128      -2.267  31.805-102.464  1.00  0.00           C  
ATOM   4339  H   THR B 128      -3.028  30.630 -99.709  1.00  0.00           H  
ATOM   4340  HA  THR B 128      -5.310  30.436-101.586  1.00  0.00           H  
ATOM   4341  HB  THR B 128      -4.214  32.633-102.127  1.00  0.00           H  
ATOM   4342  HG1 THR B 128      -4.248  32.214-104.298  1.00  0.00           H  
ATOM   4343 1HG2 THR B 128      -1.969  32.605-103.142  1.00  0.00           H  
ATOM   4344 2HG2 THR B 128      -1.913  32.031-101.458  1.00  0.00           H  
ATOM   4345 3HG2 THR B 128      -1.830  30.865-102.799  1.00  0.00           H  
ATOM   4346  N   ALA B 129      -4.180  28.604-103.028  1.00  0.00           N  
ATOM   4347  CA  ALA B 129      -3.797  27.264-103.543  1.00  0.00           C  
ATOM   4348  C   ALA B 129      -2.438  27.208-104.183  1.00  0.00           C  
ATOM   4349  O   ALA B 129      -1.919  26.106-104.499  1.00  0.00           O  
ATOM   4350  CB  ALA B 129      -4.900  26.878-104.527  1.00  0.00           C  
ATOM   4351  H   ALA B 129      -4.931  29.107-103.477  1.00  0.00           H  
ATOM   4352  HA  ALA B 129      -3.764  26.574-102.700  1.00  0.00           H  
ATOM   4353 1HB  ALA B 129      -4.685  25.897-104.949  1.00  0.00           H  
ATOM   4354 2HB  ALA B 129      -5.857  26.847-104.006  1.00  0.00           H  
ATOM   4355 3HB  ALA B 129      -4.948  27.615-105.327  1.00  0.00           H  
ATOM   4356  N   THR B 130      -1.823  28.344-104.523  1.00  0.00           N  
ATOM   4357  CA  THR B 130      -0.531  28.429-105.158  1.00  0.00           C  
ATOM   4358  C   THR B 130       0.538  28.661-104.073  1.00  0.00           C  
ATOM   4359  O   THR B 130       1.796  28.589-104.327  1.00  0.00           O  
ATOM   4360  CB  THR B 130      -0.496  29.554-106.208  1.00  0.00           C  
ATOM   4361  OG1 THR B 130      -0.706  30.818-105.565  1.00  0.00           O  
ATOM   4362  CG2 THR B 130      -1.575  29.339-107.258  1.00  0.00           C  
ATOM   4363  H   THR B 130      -2.323  29.195-104.307  1.00  0.00           H  
ATOM   4364  HA  THR B 130      -0.332  27.484-105.664  1.00  0.00           H  
ATOM   4365  HB  THR B 130       0.479  29.567-106.695  1.00  0.00           H  
ATOM   4366  HG1 THR B 130      -0.211  30.844-104.743  1.00  0.00           H  
ATOM   4367 1HG2 THR B 130      -1.535  30.143-107.992  1.00  0.00           H  
ATOM   4368 2HG2 THR B 130      -1.412  28.383-107.757  1.00  0.00           H  
ATOM   4369 3HG2 THR B 130      -2.553  29.334-106.778  1.00  0.00           H  
ATOM   4370  N   ALA B 131       0.165  28.970-102.824  1.00  0.00           N  
ATOM   4371  CA  ALA B 131       1.089  29.243-101.757  1.00  0.00           C  
ATOM   4372  C   ALA B 131       1.650  27.974-101.132  1.00  0.00           C  
ATOM   4373  O   ALA B 131       0.960  26.940-101.259  1.00  0.00           O  
ATOM   4374  CB  ALA B 131       0.473  30.106-100.714  1.00  0.00           C  
ATOM   4375  H   ALA B 131      -0.827  29.008-102.637  1.00  0.00           H  
ATOM   4376  HA  ALA B 131       1.934  29.792-102.173  1.00  0.00           H  
ATOM   4377 1HB  ALA B 131       1.197  30.294 -99.922  1.00  0.00           H  
ATOM   4378 2HB  ALA B 131       0.167  31.053-101.159  1.00  0.00           H  
ATOM   4379 3HB  ALA B 131      -0.399  29.604-100.296  1.00  0.00           H  
ATOM   4380  N   THR B 132       2.786  27.945-100.403  1.00  0.00           N  
ATOM   4381  CA  THR B 132       3.443  26.854 -99.630  1.00  0.00           C  
ATOM   4382  C   THR B 132       3.315  27.251 -98.170  1.00  0.00           C  
ATOM   4383  O   THR B 132       3.102  26.391 -97.298  1.00  0.00           O  
ATOM   4384  CB  THR B 132       4.922  26.652-100.007  1.00  0.00           C  
ATOM   4385  OG1 THR B 132       5.649  27.864 -99.765  1.00  0.00           O  
ATOM   4386  CG2 THR B 132       5.051  26.272-101.474  1.00  0.00           C  
ATOM   4387  H   THR B 132       3.217  28.858-100.428  1.00  0.00           H  
ATOM   4388  HA  THR B 132       2.923  25.920 -99.840  1.00  0.00           H  
ATOM   4389  HB  THR B 132       5.349  25.859 -99.393  1.00  0.00           H  
ATOM   4390  HG1 THR B 132       5.809  27.958 -98.823  1.00  0.00           H  
ATOM   4391 1HG2 THR B 132       6.103  26.132-101.722  1.00  0.00           H  
ATOM   4392 2HG2 THR B 132       4.509  25.345-101.658  1.00  0.00           H  
ATOM   4393 3HG2 THR B 132       4.635  27.065-102.093  1.00  0.00           H  
ATOM   4394  N   ASP B 133       3.396  28.596 -97.853  1.00  0.00           N  
ATOM   4395  CA  ASP B 133       3.231  29.137 -96.515  1.00  0.00           C  
ATOM   4396  C   ASP B 133       1.780  29.035 -95.991  1.00  0.00           C  
ATOM   4397  O   ASP B 133       0.849  29.091 -96.775  1.00  0.00           O  
ATOM   4398  CB  ASP B 133       3.683  30.599 -96.496  1.00  0.00           C  
ATOM   4399  CG  ASP B 133       5.195  30.754 -96.596  1.00  0.00           C  
ATOM   4400  OD1 ASP B 133       5.886  29.784 -96.392  1.00  0.00           O  
ATOM   4401  OD2 ASP B 133       5.644  31.839 -96.875  1.00  0.00           O  
ATOM   4402  H   ASP B 133       3.584  29.227 -98.619  1.00  0.00           H  
ATOM   4403  HA  ASP B 133       3.854  28.562 -95.830  1.00  0.00           H  
ATOM   4404 1HB  ASP B 133       3.222  31.134 -97.327  1.00  0.00           H  
ATOM   4405 2HB  ASP B 133       3.344  31.073 -95.574  1.00  0.00           H  
ATOM   4406  N   VAL B 134       1.750  28.835 -94.674  1.00  0.00           N  
ATOM   4407  CA  VAL B 134       0.452  28.629 -93.960  1.00  0.00           C  
ATOM   4408  C   VAL B 134       0.267  29.608 -92.791  1.00  0.00           C  
ATOM   4409  O   VAL B 134       1.222  29.847 -92.092  1.00  0.00           O  
ATOM   4410  CB  VAL B 134       0.361  27.191 -93.417  1.00  0.00           C  
ATOM   4411  CG1 VAL B 134      -0.968  26.972 -92.708  1.00  0.00           C  
ATOM   4412  CG2 VAL B 134       0.536  26.196 -94.554  1.00  0.00           C  
ATOM   4413  H   VAL B 134       2.610  28.822 -94.144  1.00  0.00           H  
ATOM   4414  HA  VAL B 134      -0.362  28.788 -94.668  1.00  0.00           H  
ATOM   4415  HB  VAL B 134       1.148  27.041 -92.677  1.00  0.00           H  
ATOM   4416 1HG1 VAL B 134      -1.015  25.950 -92.331  1.00  0.00           H  
ATOM   4417 2HG1 VAL B 134      -1.055  27.670 -91.876  1.00  0.00           H  
ATOM   4418 3HG1 VAL B 134      -1.785  27.137 -93.410  1.00  0.00           H  
ATOM   4419 1HG2 VAL B 134       0.471  25.181 -94.163  1.00  0.00           H  
ATOM   4420 2HG2 VAL B 134      -0.248  26.350 -95.296  1.00  0.00           H  
ATOM   4421 3HG2 VAL B 134       1.511  26.344 -95.020  1.00  0.00           H  
ATOM   4422  N   ALA B 135      -0.870  30.284 -92.737  1.00  0.00           N  
ATOM   4423  CA  ALA B 135      -1.044  31.309 -91.696  1.00  0.00           C  
ATOM   4424  C   ALA B 135      -1.355  30.722 -90.308  1.00  0.00           C  
ATOM   4425  O   ALA B 135      -2.080  29.764 -90.188  1.00  0.00           O  
ATOM   4426  CB  ALA B 135      -2.283  32.153 -92.035  1.00  0.00           C  
ATOM   4427  H   ALA B 135      -1.620  30.115 -93.391  1.00  0.00           H  
ATOM   4428  HA  ALA B 135      -0.106  31.855 -91.598  1.00  0.00           H  
ATOM   4429 1HB  ALA B 135      -2.423  32.917 -91.270  1.00  0.00           H  
ATOM   4430 2HB  ALA B 135      -2.143  32.631 -93.004  1.00  0.00           H  
ATOM   4431 3HB  ALA B 135      -3.161  31.511 -92.071  1.00  0.00           H  
ATOM   4432  N   ALA B 136      -0.886  31.453 -89.253  1.00  0.00           N  
ATOM   4433  CA  ALA B 136      -0.984  31.009 -87.780  1.00  0.00           C  
ATOM   4434  C   ALA B 136      -2.325  31.338 -87.181  1.00  0.00           C  
ATOM   4435  O   ALA B 136      -2.358  32.139 -86.226  1.00  0.00           O  
ATOM   4436  CB  ALA B 136       0.180  31.614 -86.927  1.00  0.00           C  
ATOM   4437  H   ALA B 136      -0.451  32.338 -89.472  1.00  0.00           H  
ATOM   4438  HA  ALA B 136      -0.852  29.928 -87.742  1.00  0.00           H  
ATOM   4439 1HB  ALA B 136       0.083  31.283 -85.893  1.00  0.00           H  
ATOM   4440 2HB  ALA B 136       1.136  31.279 -87.328  1.00  0.00           H  
ATOM   4441 3HB  ALA B 136       0.131  32.701 -86.966  1.00  0.00           H  
ATOM   4442  N   ALA B 137      -3.433  30.811 -87.761  1.00  0.00           N  
ATOM   4443  CA  ALA B 137      -4.798  31.000 -87.341  1.00  0.00           C  
ATOM   4444  C   ALA B 137      -5.150  30.269 -86.016  1.00  0.00           C  
ATOM   4445  O   ALA B 137      -6.000  29.416 -85.933  1.00  0.00           O  
ATOM   4446  CB  ALA B 137      -5.682  30.650 -88.546  1.00  0.00           C  
ATOM   4447  H   ALA B 137      -3.241  30.233 -88.567  1.00  0.00           H  
ATOM   4448  HA  ALA B 137      -4.949  32.062 -87.148  1.00  0.00           H  
ATOM   4449 1HB  ALA B 137      -6.730  30.777 -88.277  1.00  0.00           H  
ATOM   4450 2HB  ALA B 137      -5.438  31.308 -89.380  1.00  0.00           H  
ATOM   4451 3HB  ALA B 137      -5.506  29.615 -88.837  1.00  0.00           H  
ATOM   4452  N   ASN B 138      -4.435  30.603 -84.927  1.00  0.00           N  
ATOM   4453  CA  ASN B 138      -4.605  29.912 -83.632  1.00  0.00           C  
ATOM   4454  C   ASN B 138      -6.035  30.090 -82.913  1.00  0.00           C  
ATOM   4455  O   ASN B 138      -6.362  29.202 -82.143  1.00  0.00           O  
ATOM   4456  CB  ASN B 138      -3.488  30.365 -82.708  1.00  0.00           C  
ATOM   4457  CG  ASN B 138      -2.156  29.775 -83.080  1.00  0.00           C  
ATOM   4458  OD1 ASN B 138      -2.087  28.702 -83.690  1.00  0.00           O  
ATOM   4459  ND2 ASN B 138      -1.097  30.455 -82.724  1.00  0.00           N  
ATOM   4460  H   ASN B 138      -3.761  31.352 -85.001  1.00  0.00           H  
ATOM   4461  HA  ASN B 138      -4.531  28.836 -83.801  1.00  0.00           H  
ATOM   4462 1HB  ASN B 138      -3.412  31.452 -82.736  1.00  0.00           H  
ATOM   4463 2HB  ASN B 138      -3.726  30.079 -81.683  1.00  0.00           H  
ATOM   4464 1HD2 ASN B 138      -0.184  30.111 -82.944  1.00  0.00           H  
ATOM   4465 2HD2 ASN B 138      -1.200  31.319 -82.231  1.00  0.00           H  
ATOM   4466  N   GLY B 139      -6.820  31.122 -83.137  1.00  0.00           N  
ATOM   4467  CA  GLY B 139      -8.147  31.356 -82.500  1.00  0.00           C  
ATOM   4468  C   GLY B 139      -8.055  31.832 -81.067  1.00  0.00           C  
ATOM   4469  O   GLY B 139      -8.754  31.268 -80.188  1.00  0.00           O  
ATOM   4470  H   GLY B 139      -6.468  31.796 -83.801  1.00  0.00           H  
ATOM   4471 1HA  GLY B 139      -8.701  32.099 -83.075  1.00  0.00           H  
ATOM   4472 2HA  GLY B 139      -8.729  30.435 -82.521  1.00  0.00           H  
ATOM   4473  N   LYS B 140      -7.142  32.730 -80.778  1.00  0.00           N  
ATOM   4474  CA  LYS B 140      -6.854  33.363 -79.465  1.00  0.00           C  
ATOM   4475  C   LYS B 140      -6.712  32.428 -78.271  1.00  0.00           C  
ATOM   4476  O   LYS B 140      -7.327  32.714 -77.284  1.00  0.00           O  
ATOM   4477  CB  LYS B 140      -7.946  34.385 -79.144  1.00  0.00           C  
ATOM   4478  CG  LYS B 140      -8.058  35.523 -80.150  1.00  0.00           C  
ATOM   4479  CD  LYS B 140      -9.118  36.530 -79.730  1.00  0.00           C  
ATOM   4480  CE  LYS B 140      -9.253  37.651 -80.751  1.00  0.00           C  
ATOM   4481  NZ  LYS B 140     -10.310  38.626 -80.369  1.00  0.00           N  
ATOM   4482  H   LYS B 140      -6.589  32.992 -81.582  1.00  0.00           H  
ATOM   4483  HA  LYS B 140      -5.893  33.874 -79.530  1.00  0.00           H  
ATOM   4484 1HB  LYS B 140      -8.913  33.883 -79.099  1.00  0.00           H  
ATOM   4485 2HB  LYS B 140      -7.758  34.823 -78.164  1.00  0.00           H  
ATOM   4486 1HG  LYS B 140      -7.097  36.032 -80.232  1.00  0.00           H  
ATOM   4487 2HG  LYS B 140      -8.319  35.120 -81.128  1.00  0.00           H  
ATOM   4488 1HD  LYS B 140     -10.079  36.026 -79.628  1.00  0.00           H  
ATOM   4489 2HD  LYS B 140      -8.849  36.961 -78.766  1.00  0.00           H  
ATOM   4490 1HE  LYS B 140      -8.304  38.178 -80.839  1.00  0.00           H  
ATOM   4491 2HE  LYS B 140      -9.500  37.229 -81.724  1.00  0.00           H  
ATOM   4492 1HZ  LYS B 140     -10.368  39.352 -81.070  1.00  0.00           H  
ATOM   4493 2HZ  LYS B 140     -11.199  38.151 -80.303  1.00  0.00           H  
ATOM   4494 3HZ  LYS B 140     -10.081  39.039 -79.477  1.00  0.00           H  
ATOM   4495  N   THR B 141      -6.072  31.296 -78.434  1.00  0.00           N  
ATOM   4496  CA  THR B 141      -5.916  30.176 -77.536  1.00  0.00           C  
ATOM   4497  C   THR B 141      -7.147  29.473 -77.056  1.00  0.00           C  
ATOM   4498  O   THR B 141      -6.958  28.297 -76.603  1.00  0.00           O  
ATOM   4499  CB  THR B 141      -5.123  30.626 -76.295  1.00  0.00           C  
ATOM   4500  OG1 THR B 141      -5.919  31.532 -75.520  1.00  0.00           O  
ATOM   4501  CG2 THR B 141      -3.833  31.318 -76.709  1.00  0.00           C  
ATOM   4502  H   THR B 141      -5.641  31.259 -79.346  1.00  0.00           H  
ATOM   4503  HA  THR B 141      -5.359  29.393 -78.054  1.00  0.00           H  
ATOM   4504  HB  THR B 141      -4.883  29.758 -75.682  1.00  0.00           H  
ATOM   4505  HG1 THR B 141      -6.836  31.472 -75.801  1.00  0.00           H  
ATOM   4506 1HG2 THR B 141      -3.286  31.629 -75.819  1.00  0.00           H  
ATOM   4507 2HG2 THR B 141      -3.220  30.628 -77.289  1.00  0.00           H  
ATOM   4508 3HG2 THR B 141      -4.067  32.192 -77.315  1.00  0.00           H  
ATOM   4509  N   ASP B 142      -8.337  30.052 -77.191  1.00  0.00           N  
ATOM   4510  CA  ASP B 142      -9.584  29.371 -76.870  1.00  0.00           C  
ATOM   4511  C   ASP B 142     -10.018  28.252 -77.854  1.00  0.00           C  
ATOM   4512  O   ASP B 142     -10.574  27.256 -77.437  1.00  0.00           O  
ATOM   4513  CB  ASP B 142     -10.701  30.413 -76.775  1.00  0.00           C  
ATOM   4514  CG  ASP B 142     -10.571  31.310 -75.552  1.00  0.00           C  
ATOM   4515  OD1 ASP B 142      -9.824  30.969 -74.665  1.00  0.00           O  
ATOM   4516  OD2 ASP B 142     -11.220  32.328 -75.515  1.00  0.00           O  
ATOM   4517  H   ASP B 142      -8.369  31.002 -77.531  1.00  0.00           H  
ATOM   4518  HA  ASP B 142      -9.467  28.872 -75.907  1.00  0.00           H  
ATOM   4519 1HB  ASP B 142     -10.693  31.037 -77.668  1.00  0.00           H  
ATOM   4520 2HB  ASP B 142     -11.667  29.908 -76.736  1.00  0.00           H  
ATOM   4521  N   ASP B 143      -9.739  28.319 -79.136  1.00  0.00           N  
ATOM   4522  CA  ASP B 143     -10.047  27.235 -80.152  1.00  0.00           C  
ATOM   4523  C   ASP B 143      -8.696  26.490 -80.439  1.00  0.00           C  
ATOM   4524  O   ASP B 143      -8.633  25.853 -81.493  1.00  0.00           O  
ATOM   4525  CB  ASP B 143     -10.631  27.810 -81.444  1.00  0.00           C  
ATOM   4526  CG  ASP B 143     -12.007  28.432 -81.247  1.00  0.00           C  
ATOM   4527  OD1 ASP B 143     -12.780  27.889 -80.494  1.00  0.00           O  
ATOM   4528  OD2 ASP B 143     -12.271  29.444 -81.851  1.00  0.00           O  
ATOM   4529  H   ASP B 143      -9.285  29.167 -79.443  1.00  0.00           H  
ATOM   4530  HA  ASP B 143     -10.785  26.557 -79.722  1.00  0.00           H  
ATOM   4531 1HB  ASP B 143      -9.958  28.571 -81.841  1.00  0.00           H  
ATOM   4532 2HB  ASP B 143     -10.709  27.021 -82.192  1.00  0.00           H  
ATOM   4533  N   LYS B 144      -7.637  26.451 -79.620  1.00  0.00           N  
ATOM   4534  CA  LYS B 144      -6.340  25.762 -79.955  1.00  0.00           C  
ATOM   4535  C   LYS B 144      -5.901  24.768 -78.942  1.00  0.00           C  
ATOM   4536  O   LYS B 144      -5.534  25.126 -77.851  1.00  0.00           O  
ATOM   4537  CB  LYS B 144      -5.210  26.776 -80.140  1.00  0.00           C  
ATOM   4538  CG  LYS B 144      -3.832  26.156 -80.331  1.00  0.00           C  
ATOM   4539  CD  LYS B 144      -3.011  26.230 -79.052  1.00  0.00           C  
ATOM   4540  CE  LYS B 144      -2.506  27.643 -78.799  1.00  0.00           C  
ATOM   4541  NZ  LYS B 144      -1.694  27.729 -77.555  1.00  0.00           N  
ATOM   4542  H   LYS B 144      -7.730  26.917 -78.728  1.00  0.00           H  
ATOM   4543  HA  LYS B 144      -6.469  25.217 -80.891  1.00  0.00           H  
ATOM   4544 1HB  LYS B 144      -5.419  27.399 -81.010  1.00  0.00           H  
ATOM   4545 2HB  LYS B 144      -5.164  27.432 -79.271  1.00  0.00           H  
ATOM   4546 1HG  LYS B 144      -3.941  25.110 -80.623  1.00  0.00           H  
ATOM   4547 2HG  LYS B 144      -3.303  26.682 -81.124  1.00  0.00           H  
ATOM   4548 1HD  LYS B 144      -3.624  25.915 -78.207  1.00  0.00           H  
ATOM   4549 2HD  LYS B 144      -2.157  25.558 -79.129  1.00  0.00           H  
ATOM   4550 1HE  LYS B 144      -1.895  27.967 -79.640  1.00  0.00           H  
ATOM   4551 2HE  LYS B 144      -3.354  28.322 -78.712  1.00  0.00           H  
ATOM   4552 1HZ  LYS B 144      -1.379  28.680 -77.423  1.00  0.00           H  
ATOM   4553 2HZ  LYS B 144      -2.258  27.448 -76.765  1.00  0.00           H  
ATOM   4554 3HZ  LYS B 144      -0.894  27.118 -77.632  1.00  0.00           H  
ATOM   4555  N   ILE B 145      -5.789  23.496 -79.387  1.00  0.00           N  
ATOM   4556  CA  ILE B 145      -5.341  22.379 -78.495  1.00  0.00           C  
ATOM   4557  C   ILE B 145      -3.926  22.647 -78.375  1.00  0.00           C  
ATOM   4558  O   ILE B 145      -3.244  22.722 -79.411  1.00  0.00           O  
ATOM   4559  CB  ILE B 145      -5.572  20.965 -79.059  1.00  0.00           C  
ATOM   4560  CG1 ILE B 145      -7.070  20.698 -79.232  1.00  0.00           C  
ATOM   4561  CG2 ILE B 145      -4.943  19.920 -78.151  1.00  0.00           C  
ATOM   4562  CD1 ILE B 145      -7.380  19.425 -79.986  1.00  0.00           C  
ATOM   4563  H   ILE B 145      -6.016  23.296 -80.351  1.00  0.00           H  
ATOM   4564  HA  ILE B 145      -5.901  22.434 -77.562  1.00  0.00           H  
ATOM   4565  HB  ILE B 145      -5.123  20.891 -80.049  1.00  0.00           H  
ATOM   4566 1HG1 ILE B 145      -7.544  20.639 -78.253  1.00  0.00           H  
ATOM   4567 2HG1 ILE B 145      -7.529  21.530 -79.766  1.00  0.00           H  
ATOM   4568 1HG2 ILE B 145      -5.116  18.927 -78.565  1.00  0.00           H  
ATOM   4569 2HG2 ILE B 145      -3.871  20.100 -78.078  1.00  0.00           H  
ATOM   4570 3HG2 ILE B 145      -5.390  19.983 -77.159  1.00  0.00           H  
ATOM   4571 1HD1 ILE B 145      -8.460  19.304 -80.068  1.00  0.00           H  
ATOM   4572 2HD1 ILE B 145      -6.943  19.477 -80.984  1.00  0.00           H  
ATOM   4573 3HD1 ILE B 145      -6.960  18.574 -79.450  1.00  0.00           H  
ATOM   4574  N   ASN B 146      -3.439  22.745 -77.137  1.00  0.00           N  
ATOM   4575  CA  ASN B 146      -2.035  22.873 -76.794  1.00  0.00           C  
ATOM   4576  C   ASN B 146      -1.110  21.650 -77.091  1.00  0.00           C  
ATOM   4577  O   ASN B 146      -1.315  20.531 -76.616  1.00  0.00           O  
ATOM   4578  CB  ASN B 146      -1.945  23.242 -75.324  1.00  0.00           C  
ATOM   4579  CG  ASN B 146      -0.531  23.495 -74.878  1.00  0.00           C  
ATOM   4580  OD1 ASN B 146       0.325  22.606 -74.953  1.00  0.00           O  
ATOM   4581  ND2 ASN B 146      -0.271  24.691 -74.415  1.00  0.00           N  
ATOM   4582  H   ASN B 146      -4.127  22.725 -76.398  1.00  0.00           H  
ATOM   4583  HA  ASN B 146      -1.601  23.668 -77.402  1.00  0.00           H  
ATOM   4584 1HB  ASN B 146      -2.539  24.137 -75.136  1.00  0.00           H  
ATOM   4585 2HB  ASN B 146      -2.365  22.437 -74.721  1.00  0.00           H  
ATOM   4586 1HD2 ASN B 146       0.653  24.916 -74.104  1.00  0.00           H  
ATOM   4587 2HD2 ASN B 146      -0.994  25.379 -74.373  1.00  0.00           H  
ATOM   4588  N   THR B 147      -0.022  21.913 -77.782  1.00  0.00           N  
ATOM   4589  CA  THR B 147       0.999  20.819 -78.145  1.00  0.00           C  
ATOM   4590  C   THR B 147       1.341  19.660 -77.166  1.00  0.00           C  
ATOM   4591  O   THR B 147       1.469  18.497 -77.611  1.00  0.00           O  
ATOM   4592  CB  THR B 147       2.342  21.485 -78.496  1.00  0.00           C  
ATOM   4593  OG1 THR B 147       2.178  22.319 -79.650  1.00  0.00           O  
ATOM   4594  CG2 THR B 147       3.401  20.432 -78.783  1.00  0.00           C  
ATOM   4595  H   THR B 147       0.146  22.863 -78.083  1.00  0.00           H  
ATOM   4596  HA  THR B 147       0.628  20.274 -79.013  1.00  0.00           H  
ATOM   4597  HB  THR B 147       2.671  22.104 -77.661  1.00  0.00           H  
ATOM   4598  HG1 THR B 147       2.826  22.076 -80.315  1.00  0.00           H  
ATOM   4599 1HG2 THR B 147       4.344  20.921 -79.029  1.00  0.00           H  
ATOM   4600 2HG2 THR B 147       3.537  19.803 -77.903  1.00  0.00           H  
ATOM   4601 3HG2 THR B 147       3.083  19.816 -79.623  1.00  0.00           H  
ATOM   4602  N   LYS B 148       1.410  19.887 -75.815  1.00  0.00           N  
ATOM   4603  CA  LYS B 148       1.581  18.831 -74.858  1.00  0.00           C  
ATOM   4604  C   LYS B 148       0.453  17.745 -74.902  1.00  0.00           C  
ATOM   4605  O   LYS B 148       0.746  16.608 -74.701  1.00  0.00           O  
ATOM   4606  CB  LYS B 148       1.676  19.447 -73.462  1.00  0.00           C  
ATOM   4607  CG  LYS B 148       1.941  18.442 -72.348  1.00  0.00           C  
ATOM   4608  CD  LYS B 148       1.853  19.099 -70.979  1.00  0.00           C  
ATOM   4609  CE  LYS B 148       0.406  19.337 -70.570  1.00  0.00           C  
ATOM   4610  NZ  LYS B 148       0.288  19.715 -69.136  1.00  0.00           N  
ATOM   4611  H   LYS B 148       1.337  20.840 -75.489  1.00  0.00           H  
ATOM   4612  HA  LYS B 148       2.507  18.302 -75.087  1.00  0.00           H  
ATOM   4613 1HB  LYS B 148       2.478  20.185 -73.443  1.00  0.00           H  
ATOM   4614 2HB  LYS B 148       0.746  19.966 -73.229  1.00  0.00           H  
ATOM   4615 1HG  LYS B 148       1.209  17.636 -72.403  1.00  0.00           H  
ATOM   4616 2HG  LYS B 148       2.936  18.015 -72.473  1.00  0.00           H  
ATOM   4617 1HD  LYS B 148       2.331  18.459 -70.236  1.00  0.00           H  
ATOM   4618 2HD  LYS B 148       2.376  20.055 -70.999  1.00  0.00           H  
ATOM   4619 1HE  LYS B 148      -0.017  20.135 -71.179  1.00  0.00           H  
ATOM   4620 2HE  LYS B 148      -0.174  18.431 -70.743  1.00  0.00           H  
ATOM   4621 1HZ  LYS B 148      -0.685  19.863 -68.905  1.00  0.00           H  
ATOM   4622 2HZ  LYS B 148       0.661  18.973 -68.560  1.00  0.00           H  
ATOM   4623 3HZ  LYS B 148       0.806  20.565 -68.967  1.00  0.00           H  
ATOM   4624  N   HIS B 149      -0.759  18.115 -75.253  1.00  0.00           N  
ATOM   4625  CA  HIS B 149      -1.838  17.130 -75.257  1.00  0.00           C  
ATOM   4626  C   HIS B 149      -2.033  16.546 -76.635  1.00  0.00           C  
ATOM   4627  O   HIS B 149      -3.054  15.916 -76.968  1.00  0.00           O  
ATOM   4628  CB  HIS B 149      -3.152  17.754 -74.776  1.00  0.00           C  
ATOM   4629  CG  HIS B 149      -3.087  18.291 -73.380  1.00  0.00           C  
ATOM   4630  ND1 HIS B 149      -3.052  17.473 -72.269  1.00  0.00           N  
ATOM   4631  CD2 HIS B 149      -3.052  19.561 -72.914  1.00  0.00           C  
ATOM   4632  CE1 HIS B 149      -2.997  18.219 -71.180  1.00  0.00           C  
ATOM   4633  NE2 HIS B 149      -2.996  19.488 -71.543  1.00  0.00           N  
ATOM   4634  H   HIS B 149      -0.962  19.068 -75.520  1.00  0.00           H  
ATOM   4635  HA  HIS B 149      -1.588  16.313 -74.581  1.00  0.00           H  
ATOM   4636 1HB  HIS B 149      -3.434  18.569 -75.443  1.00  0.00           H  
ATOM   4637 2HB  HIS B 149      -3.945  17.008 -74.818  1.00  0.00           H  
ATOM   4638  HD1 HIS B 149      -2.990  16.475 -72.272  1.00  0.00           H  
ATOM   4639  HD2 HIS B 149      -3.061  20.532 -73.409  1.00  0.00           H  
ATOM   4640  HE1 HIS B 149      -2.961  17.758 -70.193  1.00  0.00           H  
ATOM   4641  N   LEU B 150      -1.170  16.725 -77.682  1.00  0.00           N  
ATOM   4642  CA  LEU B 150      -1.253  16.141 -79.029  1.00  0.00           C  
ATOM   4643  C   LEU B 150      -0.356  14.873 -79.088  1.00  0.00           C  
ATOM   4644  O   LEU B 150       0.622  14.868 -78.346  1.00  0.00           O  
ATOM   4645  CB  LEU B 150      -0.812  17.161 -80.086  1.00  0.00           C  
ATOM   4646  CG  LEU B 150      -1.614  18.468 -80.125  1.00  0.00           C  
ATOM   4647  CD1 LEU B 150      -0.983  19.422 -81.130  1.00  0.00           C  
ATOM   4648  CD2 LEU B 150      -3.060  18.167 -80.490  1.00  0.00           C  
ATOM   4649  H   LEU B 150      -0.400  17.338 -77.458  1.00  0.00           H  
ATOM   4650  HA  LEU B 150      -2.289  15.865 -79.223  1.00  0.00           H  
ATOM   4651 1HB  LEU B 150       0.231  17.417 -79.908  1.00  0.00           H  
ATOM   4652 2HB  LEU B 150      -0.887  16.697 -81.069  1.00  0.00           H  
ATOM   4653  HG  LEU B 150      -1.579  18.946 -79.145  1.00  0.00           H  
ATOM   4654 1HD1 LEU B 150      -1.552  20.351 -81.157  1.00  0.00           H  
ATOM   4655 2HD1 LEU B 150       0.044  19.636 -80.834  1.00  0.00           H  
ATOM   4656 3HD1 LEU B 150      -0.988  18.964 -82.119  1.00  0.00           H  
ATOM   4657 1HD2 LEU B 150      -3.630  19.096 -80.516  1.00  0.00           H  
ATOM   4658 2HD2 LEU B 150      -3.096  17.691 -81.470  1.00  0.00           H  
ATOM   4659 3HD2 LEU B 150      -3.491  17.497 -79.745  1.00  0.00           H  
ATOM   4660  N   PRO B 151      -0.640  13.889 -80.017  1.00  0.00           N  
ATOM   4661  CA  PRO B 151       0.163  12.697 -80.144  1.00  0.00           C  
ATOM   4662  C   PRO B 151       1.639  13.001 -80.367  1.00  0.00           C  
ATOM   4663  O   PRO B 151       1.982  13.937 -81.113  1.00  0.00           O  
ATOM   4664  CB  PRO B 151      -0.460  12.011 -81.364  1.00  0.00           C  
ATOM   4665  CG  PRO B 151      -1.888  12.439 -81.334  1.00  0.00           C  
ATOM   4666  CD  PRO B 151      -1.841  13.868 -80.862  1.00  0.00           C  
ATOM   4667  HA  PRO B 151       0.046  12.084 -79.239  1.00  0.00           H  
ATOM   4668 1HB  PRO B 151       0.061  12.327 -82.280  1.00  0.00           H  
ATOM   4669 2HB  PRO B 151      -0.340  10.921 -81.285  1.00  0.00           H  
ATOM   4670 1HG  PRO B 151      -2.336  12.338 -82.334  1.00  0.00           H  
ATOM   4671 2HG  PRO B 151      -2.465  11.789 -80.661  1.00  0.00           H  
ATOM   4672 1HD  PRO B 151      -1.739  14.538 -81.728  1.00  0.00           H  
ATOM   4673 2HD  PRO B 151      -2.757  14.098 -80.298  1.00  0.00           H  
ATOM   4674  N   SER B 152       2.540  12.120 -79.864  1.00  0.00           N  
ATOM   4675  CA  SER B 152       3.951  12.476 -79.881  1.00  0.00           C  
ATOM   4676  C   SER B 152       4.457  12.801 -81.282  1.00  0.00           C  
ATOM   4677  O   SER B 152       5.323  13.591 -81.315  1.00  0.00           O  
ATOM   4678  CB  SER B 152       4.771  11.342 -79.297  1.00  0.00           C  
ATOM   4679  OG  SER B 152       4.630  10.175 -80.059  1.00  0.00           O  
ATOM   4680  H   SER B 152       2.262  11.228 -79.479  1.00  0.00           H  
ATOM   4681  HA  SER B 152       4.091  13.368 -79.269  1.00  0.00           H  
ATOM   4682 1HB  SER B 152       5.821  11.633 -79.262  1.00  0.00           H  
ATOM   4683 2HB  SER B 152       4.450  11.152 -78.273  1.00  0.00           H  
ATOM   4684  HG  SER B 152       3.818   9.760 -79.760  1.00  0.00           H  
ATOM   4685  N   THR B 153       3.882  12.199 -82.346  1.00  0.00           N  
ATOM   4686  CA  THR B 153       4.152  12.475 -83.761  1.00  0.00           C  
ATOM   4687  C   THR B 153       3.534  13.792 -84.277  1.00  0.00           C  
ATOM   4688  O   THR B 153       4.136  14.705 -84.810  1.00  0.00           O  
ATOM   4689  CB  THR B 153       3.649  11.309 -84.632  1.00  0.00           C  
ATOM   4690  OG1 THR B 153       4.341  10.106 -84.271  1.00  0.00           O  
ATOM   4691  CG2 THR B 153       3.885  11.603 -86.106  1.00  0.00           C  
ATOM   4692  H   THR B 153       3.202  11.493 -82.104  1.00  0.00           H  
ATOM   4693  HA  THR B 153       5.229  12.575 -83.895  1.00  0.00           H  
ATOM   4694  HB  THR B 153       2.582  11.163 -84.463  1.00  0.00           H  
ATOM   4695  HG1 THR B 153       4.728  10.210 -83.399  1.00  0.00           H  
ATOM   4696 1HG2 THR B 153       3.523  10.769 -86.706  1.00  0.00           H  
ATOM   4697 2HG2 THR B 153       3.351  12.511 -86.386  1.00  0.00           H  
ATOM   4698 3HG2 THR B 153       4.951  11.741 -86.282  1.00  0.00           H  
ATOM   4699  N   CYS B 154       2.193  13.913 -84.005  1.00  0.00           N  
ATOM   4700  CA  CYS B 154       1.282  14.957 -84.419  1.00  0.00           C  
ATOM   4701  C   CYS B 154       1.449  16.184 -83.472  1.00  0.00           C  
ATOM   4702  O   CYS B 154       0.553  16.535 -82.751  1.00  0.00           O  
ATOM   4703  CB  CYS B 154      -0.161  14.452 -84.391  1.00  0.00           C  
ATOM   4704  SG  CYS B 154      -0.494  13.103 -85.549  1.00  0.00           S  
ATOM   4705  H   CYS B 154       1.844  13.151 -83.441  1.00  0.00           H  
ATOM   4706  HA  CYS B 154       1.530  15.247 -85.440  1.00  0.00           H  
ATOM   4707 1HB  CYS B 154      -0.405  14.104 -83.387  1.00  0.00           H  
ATOM   4708 2HB  CYS B 154      -0.838  15.273 -84.626  1.00  0.00           H  
ATOM   4709  HG  CYS B 154       0.364  12.243 -85.010  1.00  0.00           H  
ATOM   4710  N   ARG B 155       2.619  16.842 -83.346  1.00  0.00           N  
ATOM   4711  CA  ARG B 155       3.008  18.064 -82.574  1.00  0.00           C  
ATOM   4712  C   ARG B 155       3.686  19.234 -83.185  1.00  0.00           C  
ATOM   4713  O   ARG B 155       4.694  19.749 -82.762  1.00  0.00           O  
ATOM   4714  CB  ARG B 155       3.918  17.644 -81.429  1.00  0.00           C  
ATOM   4715  CG  ARG B 155       3.219  16.922 -80.288  1.00  0.00           C  
ATOM   4716  CD  ARG B 155       4.134  16.691 -79.141  1.00  0.00           C  
ATOM   4717  NE  ARG B 155       5.153  15.701 -79.452  1.00  0.00           N  
ATOM   4718  CZ  ARG B 155       6.255  15.479 -78.709  1.00  0.00           C  
ATOM   4719  NH1 ARG B 155       6.466  16.183 -77.619  1.00  0.00           N  
ATOM   4720  NH2 ARG B 155       7.125  14.554 -79.077  1.00  0.00           N  
ATOM   4721  H   ARG B 155       3.317  16.368 -83.902  1.00  0.00           H  
ATOM   4722  HA  ARG B 155       2.103  18.521 -82.172  1.00  0.00           H  
ATOM   4723 1HB  ARG B 155       4.698  16.984 -81.808  1.00  0.00           H  
ATOM   4724 2HB  ARG B 155       4.408  18.524 -81.012  1.00  0.00           H  
ATOM   4725 1HG  ARG B 155       2.377  17.521 -79.940  1.00  0.00           H  
ATOM   4726 2HG  ARG B 155       2.856  15.954 -80.637  1.00  0.00           H  
ATOM   4727 1HD  ARG B 155       4.633  17.624 -78.881  1.00  0.00           H  
ATOM   4728 2HD  ARG B 155       3.562  16.334 -78.286  1.00  0.00           H  
ATOM   4729  HE  ARG B 155       5.026  15.140 -80.283  1.00  0.00           H  
ATOM   4730 1HH1 ARG B 155       5.802  16.891 -77.338  1.00  0.00           H  
ATOM   4731 2HH1 ARG B 155       7.292  16.017 -77.063  1.00  0.00           H  
ATOM   4732 1HH2 ARG B 155       6.962  14.013 -79.915  1.00  0.00           H  
ATOM   4733 2HH2 ARG B 155       7.950  14.388 -78.521  1.00  0.00           H  
ATOM   4734  N   ASP B 156       3.114  19.798 -84.277  1.00  0.00           N  
ATOM   4735  CA  ASP B 156       3.548  20.962 -85.001  1.00  0.00           C  
ATOM   4736  C   ASP B 156       2.721  22.269 -84.745  1.00  0.00           C  
ATOM   4737  O   ASP B 156       1.597  22.234 -84.239  1.00  0.00           O  
ATOM   4738  CB  ASP B 156       3.532  20.627 -86.494  1.00  0.00           C  
ATOM   4739  CG  ASP B 156       4.513  19.523 -86.864  1.00  0.00           C  
ATOM   4740  OD1 ASP B 156       5.644  19.594 -86.443  1.00  0.00           O  
ATOM   4741  OD2 ASP B 156       4.123  18.619 -87.565  1.00  0.00           O  
ATOM   4742  H   ASP B 156       2.286  19.309 -84.583  1.00  0.00           H  
ATOM   4743  HA  ASP B 156       4.564  21.205 -84.688  1.00  0.00           H  
ATOM   4744 1HB  ASP B 156       2.529  20.315 -86.787  1.00  0.00           H  
ATOM   4745 2HB  ASP B 156       3.778  21.520 -87.070  1.00  0.00           H  
ATOM   4746  N   ASP B 157       3.302  23.372 -85.128  1.00  0.00           N  
ATOM   4747  CA  ASP B 157       2.742  24.662 -85.057  1.00  0.00           C  
ATOM   4748  C   ASP B 157       3.218  25.577 -86.188  1.00  0.00           C  
ATOM   4749  O   ASP B 157       3.907  25.100 -87.106  1.00  0.00           O  
ATOM   4750  CB  ASP B 157       3.079  25.281 -83.698  1.00  0.00           C  
ATOM   4751  CG  ASP B 157       4.572  25.515 -83.507  1.00  0.00           C  
ATOM   4752  OD1 ASP B 157       5.241  25.778 -84.478  1.00  0.00           O  
ATOM   4753  OD2 ASP B 157       5.028  25.428 -82.392  1.00  0.00           O  
ATOM   4754  H   ASP B 157       4.233  23.259 -85.504  1.00  0.00           H  
ATOM   4755  HA  ASP B 157       1.660  24.575 -85.155  1.00  0.00           H  
ATOM   4756 1HB  ASP B 157       2.561  26.235 -83.595  1.00  0.00           H  
ATOM   4757 2HB  ASP B 157       2.723  24.627 -82.902  1.00  0.00           H  
ATOM   4758  N   SER B 158       3.006  26.903 -86.189  1.00  0.00           N  
ATOM   4759  CA  SER B 158       3.403  27.827 -87.275  1.00  0.00           C  
ATOM   4760  C   SER B 158       4.915  27.951 -87.600  1.00  0.00           C  
ATOM   4761  O   SER B 158       5.279  28.310 -88.701  1.00  0.00           O  
ATOM   4762  CB  SER B 158       2.874  29.208 -86.937  1.00  0.00           C  
ATOM   4763  OG  SER B 158       3.528  29.735 -85.815  1.00  0.00           O  
ATOM   4764  H   SER B 158       2.537  27.273 -85.375  1.00  0.00           H  
ATOM   4765  HA  SER B 158       2.956  27.480 -88.207  1.00  0.00           H  
ATOM   4766 1HB  SER B 158       3.017  29.871 -87.789  1.00  0.00           H  
ATOM   4767 2HB  SER B 158       1.804  29.150 -86.743  1.00  0.00           H  
ATOM   4768  HG  SER B 158       4.456  29.800 -86.056  1.00  0.00           H  
ATOM   4769  N   SER B 159       5.824  27.514 -86.632  1.00  0.00           N  
ATOM   4770  CA  SER B 159       7.305  27.472 -86.792  1.00  0.00           C  
ATOM   4771  C   SER B 159       7.950  26.232 -87.420  1.00  0.00           C  
ATOM   4772  O   SER B 159       9.183  26.188 -87.727  1.00  0.00           O  
ATOM   4773  CB  SER B 159       7.937  27.672 -85.428  1.00  0.00           C  
ATOM   4774  OG  SER B 159       7.745  26.546 -84.616  1.00  0.00           O  
ATOM   4775  H   SER B 159       5.414  27.207 -85.761  1.00  0.00           H  
ATOM   4776  HA  SER B 159       7.604  28.282 -87.458  1.00  0.00           H  
ATOM   4777 1HB  SER B 159       9.004  27.861 -85.546  1.00  0.00           H  
ATOM   4778 2HB  SER B 159       7.500  28.547 -84.950  1.00  0.00           H  
ATOM   4779  HG  SER B 159       6.799  26.386 -84.604  1.00  0.00           H  
ATOM   4780  N   ALA B 160       7.116  25.224 -87.571  1.00  0.00           N  
ATOM   4781  CA  ALA B 160       7.351  23.878 -88.100  1.00  0.00           C  
ATOM   4782  C   ALA B 160       7.906  23.938 -89.564  1.00  0.00           C  
ATOM   4783  O   ALA B 160       7.422  24.739 -90.391  1.00  0.00           O  
ATOM   4784  CB  ALA B 160       6.145  22.947 -87.970  1.00  0.00           C  
ATOM   4785  H   ALA B 160       6.189  25.475 -87.260  1.00  0.00           H  
ATOM   4786  HA  ALA B 160       8.107  23.398 -87.479  1.00  0.00           H  
ATOM   4787 1HB  ALA B 160       6.394  21.969 -88.382  1.00  0.00           H  
ATOM   4788 2HB  ALA B 160       5.879  22.841 -86.918  1.00  0.00           H  
ATOM   4789 3HB  ALA B 160       5.302  23.367 -88.516  1.00  0.00           H  
ATOM   4790  N   SER B 161       8.958  23.154 -89.806  1.00  0.00           N  
ATOM   4791  CA  SER B 161       9.744  22.948 -91.075  1.00  0.00           C  
ATOM   4792  C   SER B 161      10.497  21.598 -91.150  1.00  0.00           C  
ATOM   4793  O   SER B 161      10.639  20.890 -90.115  1.00  0.00           O  
ATOM   4794  OXT SER B 161      10.948  21.220 -92.196  1.00  0.00           O  
ATOM   4795  CB  SER B 161      10.748  24.071 -91.241  1.00  0.00           C  
ATOM   4796  OG  SER B 161      11.486  23.916 -92.422  1.00  0.00           O  
ATOM   4797  H   SER B 161       9.224  22.645 -88.975  1.00  0.00           H  
ATOM   4798  HA  SER B 161       9.051  22.962 -91.918  1.00  0.00           H  
ATOM   4799 1HB  SER B 161      10.225  25.027 -91.259  1.00  0.00           H  
ATOM   4800 2HB  SER B 161      11.424  24.084 -90.387  1.00  0.00           H  
ATOM   4801  HG  SER B 161      12.405  23.844 -92.153  1.00  0.00           H  
TER    4802      SER B 161 
ATOM   4803  N   PHE C   1      -4.646   8.836 -25.309  1.00  0.00           N  
ATOM   4804  CA  PHE C   1      -3.333   8.247 -25.635  1.00  0.00           C  
ATOM   4805  C   PHE C   1      -2.910   8.318 -27.164  1.00  0.00           C  
ATOM   4806  O   PHE C   1      -3.341   7.459 -27.985  1.00  0.00           O  
ATOM   4807  CB  PHE C   1      -3.329   6.788 -25.176  1.00  0.00           C  
ATOM   4808  CG  PHE C   1      -3.468   6.619 -23.690  1.00  0.00           C  
ATOM   4809  CD1 PHE C   1      -4.705   6.357 -23.120  1.00  0.00           C  
ATOM   4810  CD2 PHE C   1      -2.363   6.722 -22.859  1.00  0.00           C  
ATOM   4811  CE1 PHE C   1      -4.835   6.202 -21.753  1.00  0.00           C  
ATOM   4812  CE2 PHE C   1      -2.490   6.566 -21.492  1.00  0.00           C  
ATOM   4813  CZ  PHE C   1      -3.727   6.306 -20.939  1.00  0.00           C  
ATOM   4814 1H   PHE C   1      -4.820   8.742 -24.328  1.00  0.00           H  
ATOM   4815 2H   PHE C   1      -4.649   9.805 -25.556  1.00  0.00           H  
ATOM   4816 3H   PHE C   1      -5.362   8.360 -25.820  1.00  0.00           H  
ATOM   4817  HA  PHE C   1      -2.562   8.802 -25.098  1.00  0.00           H  
ATOM   4818 1HB  PHE C   1      -4.147   6.253 -25.657  1.00  0.00           H  
ATOM   4819 2HB  PHE C   1      -2.400   6.312 -25.487  1.00  0.00           H  
ATOM   4820  HD1 PHE C   1      -5.581   6.274 -23.765  1.00  0.00           H  
ATOM   4821  HD2 PHE C   1      -1.386   6.928 -23.296  1.00  0.00           H  
ATOM   4822  HE1 PHE C   1      -5.813   5.997 -21.319  1.00  0.00           H  
ATOM   4823  HE2 PHE C   1      -1.613   6.649 -20.850  1.00  0.00           H  
ATOM   4824  HZ  PHE C   1      -3.829   6.185 -19.861  1.00  0.00           H  
ATOM   4825  N   THR C   2      -2.028   9.253 -27.617  1.00  0.00           N  
ATOM   4826  CA  THR C   2      -1.748   9.435 -29.054  1.00  0.00           C  
ATOM   4827  C   THR C   2      -1.131   8.172 -29.715  1.00  0.00           C  
ATOM   4828  O   THR C   2      -1.533   7.881 -30.860  1.00  0.00           O  
ATOM   4829  CB  THR C   2      -0.809  10.636 -29.271  1.00  0.00           C  
ATOM   4830  OG1 THR C   2      -1.407  11.819 -28.726  1.00  0.00           O  
ATOM   4831  CG2 THR C   2      -0.543  10.844 -30.754  1.00  0.00           C  
ATOM   4832  H   THR C   2      -1.551   9.838 -26.945  1.00  0.00           H  
ATOM   4833  HA  THR C   2      -2.690   9.632 -29.567  1.00  0.00           H  
ATOM   4834  HB  THR C   2       0.137  10.455 -28.760  1.00  0.00           H  
ATOM   4835  HG1 THR C   2      -2.223  12.010 -29.196  1.00  0.00           H  
ATOM   4836 1HG2 THR C   2       0.123  11.696 -30.888  1.00  0.00           H  
ATOM   4837 2HG2 THR C   2      -0.077   9.950 -31.169  1.00  0.00           H  
ATOM   4838 3HG2 THR C   2      -1.483  11.035 -31.269  1.00  0.00           H  
ATOM   4839  N   LEU C   3      -0.344   7.392 -28.931  1.00  0.00           N  
ATOM   4840  CA  LEU C   3       0.163   6.036 -29.441  1.00  0.00           C  
ATOM   4841  C   LEU C   3      -0.947   5.143 -30.083  1.00  0.00           C  
ATOM   4842  O   LEU C   3      -0.640   4.406 -31.028  1.00  0.00           O  
ATOM   4843  CB  LEU C   3       0.810   5.251 -28.293  1.00  0.00           C  
ATOM   4844  CG  LEU C   3       1.508   3.945 -28.690  1.00  0.00           C  
ATOM   4845  CD1 LEU C   3       2.627   4.246 -29.679  1.00  0.00           C  
ATOM   4846  CD2 LEU C   3       2.050   3.259 -27.445  1.00  0.00           C  
ATOM   4847  H   LEU C   3      -0.084   7.697 -28.004  1.00  0.00           H  
ATOM   4848  HA  LEU C   3       0.911   6.214 -30.212  1.00  0.00           H  
ATOM   4849 1HB  LEU C   3       1.550   5.888 -27.810  1.00  0.00           H  
ATOM   4850 2HB  LEU C   3       0.040   5.006 -27.561  1.00  0.00           H  
ATOM   4851  HG  LEU C   3       0.794   3.286 -29.186  1.00  0.00           H  
ATOM   4852 1HD1 LEU C   3       3.123   3.318 -29.961  1.00  0.00           H  
ATOM   4853 2HD1 LEU C   3       2.209   4.719 -30.568  1.00  0.00           H  
ATOM   4854 3HD1 LEU C   3       3.350   4.917 -29.216  1.00  0.00           H  
ATOM   4855 1HD2 LEU C   3       2.546   2.329 -27.727  1.00  0.00           H  
ATOM   4856 2HD2 LEU C   3       2.765   3.916 -26.949  1.00  0.00           H  
ATOM   4857 3HD2 LEU C   3       1.227   3.039 -26.764  1.00  0.00           H  
ATOM   4858  N   ILE C   4      -2.238   5.285 -29.649  1.00  0.00           N  
ATOM   4859  CA  ILE C   4      -3.309   4.543 -30.297  1.00  0.00           C  
ATOM   4860  C   ILE C   4      -3.345   4.896 -31.791  1.00  0.00           C  
ATOM   4861  O   ILE C   4      -3.459   3.943 -32.590  1.00  0.00           O  
ATOM   4862  CB  ILE C   4      -4.670   4.848 -29.645  1.00  0.00           C  
ATOM   4863  CG1 ILE C   4      -4.718   4.288 -28.221  1.00  0.00           C  
ATOM   4864  CG2 ILE C   4      -5.801   4.276 -30.485  1.00  0.00           C  
ATOM   4865  CD1 ILE C   4      -5.901   4.773 -27.415  1.00  0.00           C  
ATOM   4866  H   ILE C   4      -2.461   5.901 -28.880  1.00  0.00           H  
ATOM   4867  HA  ILE C   4      -3.107   3.478 -30.185  1.00  0.00           H  
ATOM   4868  HB  ILE C   4      -4.800   5.927 -29.564  1.00  0.00           H  
ATOM   4869 1HG1 ILE C   4      -4.754   3.200 -28.260  1.00  0.00           H  
ATOM   4870 2HG1 ILE C   4      -3.808   4.566 -27.690  1.00  0.00           H  
ATOM   4871 1HG2 ILE C   4      -6.756   4.500 -30.010  1.00  0.00           H  
ATOM   4872 2HG2 ILE C   4      -5.777   4.720 -31.479  1.00  0.00           H  
ATOM   4873 3HG2 ILE C   4      -5.682   3.195 -30.567  1.00  0.00           H  
ATOM   4874 1HD1 ILE C   4      -5.866   4.334 -26.417  1.00  0.00           H  
ATOM   4875 2HD1 ILE C   4      -5.865   5.860 -27.334  1.00  0.00           H  
ATOM   4876 3HD1 ILE C   4      -6.825   4.476 -27.909  1.00  0.00           H  
ATOM   4877  N   GLU C   5      -3.107   6.152 -32.190  1.00  0.00           N  
ATOM   4878  CA  GLU C   5      -3.115   6.547 -33.574  1.00  0.00           C  
ATOM   4879  C   GLU C   5      -2.191   5.704 -34.416  1.00  0.00           C  
ATOM   4880  O   GLU C   5      -2.700   5.213 -35.416  1.00  0.00           O  
ATOM   4881  CB  GLU C   5      -2.725   8.021 -33.701  1.00  0.00           C  
ATOM   4882  CG  GLU C   5      -2.795   8.570 -35.119  1.00  0.00           C  
ATOM   4883  CD  GLU C   5      -4.204   8.709 -35.624  1.00  0.00           C  
ATOM   4884  OE1 GLU C   5      -5.103   8.747 -34.818  1.00  0.00           O  
ATOM   4885  OE2 GLU C   5      -4.382   8.777 -36.818  1.00  0.00           O  
ATOM   4886  H   GLU C   5      -2.914   6.846 -31.482  1.00  0.00           H  
ATOM   4887  HA  GLU C   5      -4.124   6.414 -33.966  1.00  0.00           H  
ATOM   4888 1HB  GLU C   5      -3.382   8.626 -33.076  1.00  0.00           H  
ATOM   4889 2HB  GLU C   5      -1.707   8.161 -33.338  1.00  0.00           H  
ATOM   4890 1HG  GLU C   5      -2.314   9.548 -35.143  1.00  0.00           H  
ATOM   4891 2HG  GLU C   5      -2.240   7.907 -35.782  1.00  0.00           H  
ATOM   4892  N   LEU C   6      -1.004   5.319 -33.921  1.00  0.00           N  
ATOM   4893  CA  LEU C   6       0.005   4.421 -34.557  1.00  0.00           C  
ATOM   4894  C   LEU C   6      -0.554   3.028 -34.811  1.00  0.00           C  
ATOM   4895  O   LEU C   6      -0.498   2.516 -35.904  1.00  0.00           O  
ATOM   4896  CB  LEU C   6       1.254   4.306 -33.675  1.00  0.00           C  
ATOM   4897  CG  LEU C   6       2.339   3.346 -34.181  1.00  0.00           C  
ATOM   4898  CD1 LEU C   6       2.766   3.755 -35.584  1.00  0.00           C  
ATOM   4899  CD2 LEU C   6       3.520   3.365 -33.222  1.00  0.00           C  
ATOM   4900  H   LEU C   6      -0.812   5.706 -33.009  1.00  0.00           H  
ATOM   4901  HA  LEU C   6       0.294   4.851 -35.516  1.00  0.00           H  
ATOM   4902 1HB  LEU C   6       1.704   5.293 -33.579  1.00  0.00           H  
ATOM   4903 2HB  LEU C   6       0.950   3.970 -32.684  1.00  0.00           H  
ATOM   4904  HG  LEU C   6       1.933   2.336 -34.237  1.00  0.00           H  
ATOM   4905 1HD1 LEU C   6       3.537   3.073 -35.943  1.00  0.00           H  
ATOM   4906 2HD1 LEU C   6       1.906   3.714 -36.253  1.00  0.00           H  
ATOM   4907 3HD1 LEU C   6       3.162   4.770 -35.562  1.00  0.00           H  
ATOM   4908 1HD2 LEU C   6       4.291   2.682 -33.581  1.00  0.00           H  
ATOM   4909 2HD2 LEU C   6       3.927   4.374 -33.166  1.00  0.00           H  
ATOM   4910 3HD2 LEU C   6       3.190   3.051 -32.232  1.00  0.00           H  
ATOM   4911  N   MET C   7      -1.246   2.450 -33.811  1.00  0.00           N  
ATOM   4912  CA  MET C   7      -1.972   1.199 -33.943  1.00  0.00           C  
ATOM   4913  C   MET C   7      -3.097   1.189 -35.033  1.00  0.00           C  
ATOM   4914  O   MET C   7      -3.259   0.233 -35.798  1.00  0.00           O  
ATOM   4915  CB  MET C   7      -2.558   0.841 -32.579  1.00  0.00           C  
ATOM   4916  CG  MET C   7      -3.321  -0.475 -32.547  1.00  0.00           C  
ATOM   4917  SD  MET C   7      -5.026  -0.304 -33.111  1.00  0.00           S  
ATOM   4918  CE  MET C   7      -5.744   0.606 -31.746  1.00  0.00           C  
ATOM   4919  H   MET C   7      -1.250   2.929 -32.922  1.00  0.00           H  
ATOM   4920  HA  MET C   7      -1.273   0.425 -34.258  1.00  0.00           H  
ATOM   4921 1HB  MET C   7      -1.756   0.780 -31.844  1.00  0.00           H  
ATOM   4922 2HB  MET C   7      -3.238   1.630 -32.256  1.00  0.00           H  
ATOM   4923 1HG  MET C   7      -2.819  -1.203 -33.183  1.00  0.00           H  
ATOM   4924 2HG  MET C   7      -3.333  -0.864 -31.529  1.00  0.00           H  
ATOM   4925 1HE  MET C   7      -6.800   0.790 -31.947  1.00  0.00           H  
ATOM   4926 2HE  MET C   7      -5.644   0.025 -30.829  1.00  0.00           H  
ATOM   4927 3HE  MET C   7      -5.226   1.559 -31.631  1.00  0.00           H  
ATOM   4928  N   ILE C   8      -3.786   2.384 -35.171  1.00  0.00           N  
ATOM   4929  CA  ILE C   8      -4.878   2.596 -36.123  1.00  0.00           C  
ATOM   4930  C   ILE C   8      -4.310   2.621 -37.552  1.00  0.00           C  
ATOM   4931  O   ILE C   8      -4.761   1.837 -38.328  1.00  0.00           O  
ATOM   4932  CB  ILE C   8      -5.630   3.908 -35.831  1.00  0.00           C  
ATOM   4933  CG1 ILE C   8      -6.352   3.820 -34.484  1.00  0.00           C  
ATOM   4934  CG2 ILE C   8      -6.614   4.217 -36.948  1.00  0.00           C  
ATOM   4935  CD1 ILE C   8      -6.886   5.146 -33.990  1.00  0.00           C  
ATOM   4936  H   ILE C   8      -3.503   3.144 -34.569  1.00  0.00           H  
ATOM   4937  HA  ILE C   8      -5.583   1.772 -36.030  1.00  0.00           H  
ATOM   4938  HB  ILE C   8      -4.915   4.727 -35.752  1.00  0.00           H  
ATOM   4939 1HG1 ILE C   8      -7.186   3.124 -34.563  1.00  0.00           H
[truncated: 3,683,036 more chars]
