# Supplementary material for: Predicting and Interpreting the Structure of Type IV Pilus of Electricigens by Molecular Dynamics Simulations
Source: Molecules. 2017 Aug 12;22(8):1342. doi: 10.3390/molecules22081342 (PMC6152092; doi:10.3390/molecules22081342)
Supplement: Supplementary file 1 [file molecules-22-01342-s001.zip › Neisseria meningitidis 3 (NM3).pdb]

ATOM      1  N   PHE A   1      -0.689  -5.468 -42.452  1.00  0.00           N  
ATOM      2  CA  PHE A   1       0.411  -5.196 -43.364  1.00  0.00           C  
ATOM      3  C   PHE A   1       0.055  -5.647 -44.762  1.00  0.00           C  
ATOM      4  O   PHE A   1       0.893  -6.139 -45.510  1.00  0.00           O  
ATOM      5  CB  PHE A   1       1.688  -5.901 -42.903  1.00  0.00           C  
ATOM      6  CG  PHE A   1       2.286  -5.316 -41.655  1.00  0.00           C  
ATOM      7  CD1 PHE A   1       1.945  -5.814 -40.406  1.00  0.00           C  
ATOM      8  CD2 PHE A   1       3.189  -4.266 -41.727  1.00  0.00           C  
ATOM      9  CE1 PHE A   1       2.495  -5.276 -39.258  1.00  0.00           C  
ATOM     10  CE2 PHE A   1       3.740  -3.727 -40.581  1.00  0.00           C  
ATOM     11  CZ  PHE A   1       3.392  -4.233 -39.345  1.00  0.00           C  
ATOM     12 1H   PHE A   1      -0.442  -5.166 -41.532  1.00  0.00           H  
ATOM     13 2H   PHE A   1      -1.505  -4.976 -42.756  1.00  0.00           H  
ATOM     14 3H   PHE A   1      -0.878  -6.450 -42.440  1.00  0.00           H  
ATOM     15  HA  PHE A   1       0.594  -4.121 -43.375  1.00  0.00           H  
ATOM     16 1HB  PHE A   1       1.476  -6.953 -42.717  1.00  0.00           H  
ATOM     17 2HB  PHE A   1       2.436  -5.852 -43.693  1.00  0.00           H  
ATOM     18  HD1 PHE A   1       1.237  -6.639 -40.337  1.00  0.00           H  
ATOM     19  HD2 PHE A   1       3.463  -3.866 -42.704  1.00  0.00           H  
ATOM     20  HE1 PHE A   1       2.218  -5.677 -38.283  1.00  0.00           H  
ATOM     21  HE2 PHE A   1       4.449  -2.902 -40.652  1.00  0.00           H  
ATOM     22  HZ  PHE A   1       3.825  -3.808 -38.440  1.00  0.00           H  
ATOM     23  N   THR A   2      -1.211  -5.468 -45.118  1.00  0.00           N  
ATOM     24  CA  THR A   2      -1.628  -5.867 -46.450  1.00  0.00           C  
ATOM     25  C   THR A   2      -0.966  -4.972 -47.476  1.00  0.00           C  
ATOM     26  O   THR A   2      -0.764  -5.380 -48.623  1.00  0.00           O  
ATOM     27  CB  THR A   2      -3.159  -5.807 -46.607  1.00  0.00           C  
ATOM     28  OG1 THR A   2      -3.769  -6.783 -45.753  1.00  0.00           O  
ATOM     29  CG2 THR A   2      -3.558  -6.079 -48.049  1.00  0.00           C  
ATOM     30  H   THR A   2      -1.891  -5.062 -44.491  1.00  0.00           H  
ATOM     31  HA  THR A   2      -1.311  -6.897 -46.617  1.00  0.00           H  
ATOM     32  HB  THR A   2      -3.516  -4.818 -46.318  1.00  0.00           H  
ATOM     33  HG1 THR A   2      -3.277  -7.606 -45.807  1.00  0.00           H  
ATOM     34 1HG2 THR A   2      -4.643  -6.032 -48.141  1.00  0.00           H  
ATOM     35 2HG2 THR A   2      -3.106  -5.331 -48.700  1.00  0.00           H  
ATOM     36 3HG2 THR A   2      -3.213  -7.070 -48.341  1.00  0.00           H  
ATOM     37  N   LEU A   3      -0.650  -3.736 -47.080  1.00  0.00           N  
ATOM     38  CA  LEU A   3      -0.005  -2.791 -47.984  1.00  0.00           C  
ATOM     39  C   LEU A   3       1.401  -3.241 -48.342  1.00  0.00           C  
ATOM     40  O   LEU A   3       2.037  -2.672 -49.234  1.00  0.00           O  
ATOM     41  CB  LEU A   3       0.046  -1.398 -47.345  1.00  0.00           C  
ATOM     42  CG  LEU A   3      -1.313  -0.739 -47.076  1.00  0.00           C  
ATOM     43  CD1 LEU A   3      -1.099   0.613 -46.407  1.00  0.00           C  
ATOM     44  CD2 LEU A   3      -2.072  -0.586 -48.385  1.00  0.00           C  
ATOM     45  H   LEU A   3      -0.862  -3.448 -46.135  1.00  0.00           H  
ATOM     46  HA  LEU A   3      -0.591  -2.735 -48.901  1.00  0.00           H  
ATOM     47 1HB  LEU A   3       0.573  -1.470 -46.395  1.00  0.00           H  
ATOM     48 2HB  LEU A   3       0.611  -0.735 -48.001  1.00  0.00           H  
ATOM     49  HG  LEU A   3      -1.890  -1.361 -46.392  1.00  0.00           H  
ATOM     50 1HD1 LEU A   3      -2.064   1.081 -46.215  1.00  0.00           H  
ATOM     51 2HD1 LEU A   3      -0.571   0.472 -45.464  1.00  0.00           H  
ATOM     52 3HD1 LEU A   3      -0.509   1.253 -47.062  1.00  0.00           H  
ATOM     53 1HD2 LEU A   3      -3.038  -0.119 -48.194  1.00  0.00           H  
ATOM     54 2HD2 LEU A   3      -1.496   0.037 -49.069  1.00  0.00           H  
ATOM     55 3HD2 LEU A   3      -2.226  -1.568 -48.833  1.00  0.00           H  
ATOM     56  N   ILE A   4       1.917  -4.258 -47.643  1.00  0.00           N  
ATOM     57  CA  ILE A   4       3.219  -4.788 -48.036  1.00  0.00           C  
ATOM     58  C   ILE A   4       3.067  -5.561 -49.330  1.00  0.00           C  
ATOM     59  O   ILE A   4       3.913  -5.474 -50.224  1.00  0.00           O  
ATOM     60  CB  ILE A   4       3.813  -5.699 -46.947  1.00  0.00           C  
ATOM     61  CG1 ILE A   4       4.035  -4.911 -45.654  1.00  0.00           C  
ATOM     62  CG2 ILE A   4       5.116  -6.320 -47.426  1.00  0.00           C  
ATOM     63  CD1 ILE A   4       4.954  -3.721 -45.814  1.00  0.00           C  
ATOM     64  H   ILE A   4       1.436  -4.669 -46.856  1.00  0.00           H  
ATOM     65  HA  ILE A   4       3.901  -3.952 -48.187  1.00  0.00           H  
ATOM     66  HB  ILE A   4       3.107  -6.495 -46.714  1.00  0.00           H  
ATOM     67 1HG1 ILE A   4       3.077  -4.555 -45.276  1.00  0.00           H  
ATOM     68 2HG1 ILE A   4       4.460  -5.569 -44.895  1.00  0.00           H  
ATOM     69 1HG2 ILE A   4       5.523  -6.961 -46.644  1.00  0.00           H  
ATOM     70 2HG2 ILE A   4       4.929  -6.914 -48.320  1.00  0.00           H  
ATOM     71 3HG2 ILE A   4       5.832  -5.531 -47.657  1.00  0.00           H  
ATOM     72 1HD1 ILE A   4       5.062  -3.214 -44.855  1.00  0.00           H  
ATOM     73 2HD1 ILE A   4       5.932  -4.060 -46.158  1.00  0.00           H  
ATOM     74 3HD1 ILE A   4       4.531  -3.031 -46.543  1.00  0.00           H  
ATOM     75  N   GLU A   5       1.948  -6.277 -49.463  1.00  0.00           N  
ATOM     76  CA  GLU A   5       1.645  -6.970 -50.708  1.00  0.00           C  
ATOM     77  C   GLU A   5       1.305  -5.979 -51.807  1.00  0.00           C  
ATOM     78  O   GLU A   5       1.637  -6.191 -52.979  1.00  0.00           O  
ATOM     79  CB  GLU A   5       0.485  -7.949 -50.512  1.00  0.00           C  
ATOM     80  CG  GLU A   5       0.243  -8.882 -51.690  1.00  0.00           C  
ATOM     81  CD  GLU A   5      -0.715  -9.995 -51.367  1.00  0.00           C  
ATOM     82  OE1 GLU A   5      -1.805  -9.708 -50.933  1.00  0.00           O  
ATOM     83  OE2 GLU A   5      -0.356 -11.133 -51.555  1.00  0.00           O  
ATOM     84  H   GLU A   5       1.297  -6.342 -48.693  1.00  0.00           H  
ATOM     85  HA  GLU A   5       2.528  -7.534 -51.013  1.00  0.00           H  
ATOM     86 1HB  GLU A   5       0.673  -8.563 -49.631  1.00  0.00           H  
ATOM     87 2HB  GLU A   5      -0.434  -7.391 -50.332  1.00  0.00           H  
ATOM     88 1HG  GLU A   5      -0.158  -8.303 -52.522  1.00  0.00           H  
ATOM     89 2HG  GLU A   5       1.195  -9.307 -52.004  1.00  0.00           H  
ATOM     90  N   LEU A   6       0.672  -4.865 -51.446  1.00  0.00           N  
ATOM     91  CA  LEU A   6       0.517  -3.770 -52.389  1.00  0.00           C  
ATOM     92  C   LEU A   6       1.868  -3.228 -52.819  1.00  0.00           C  
ATOM     93  O   LEU A   6       2.072  -2.868 -53.984  1.00  0.00           O  
ATOM     94  CB  LEU A   6      -0.319  -2.645 -51.765  1.00  0.00           C  
ATOM     95  CG  LEU A   6      -0.560  -1.422 -52.658  1.00  0.00           C  
ATOM     96  CD1 LEU A   6      -1.243  -1.859 -53.947  1.00  0.00           C  
ATOM     97  CD2 LEU A   6      -1.407  -0.404 -51.908  1.00  0.00           C  
ATOM     98  H   LEU A   6       0.295  -4.769 -50.514  1.00  0.00           H  
ATOM     99  HA  LEU A   6      -0.003  -4.144 -53.270  1.00  0.00           H  
ATOM    100 1HB  LEU A   6      -1.292  -3.049 -51.487  1.00  0.00           H  
ATOM    101 2HB  LEU A   6       0.181  -2.302 -50.860  1.00  0.00           H  
ATOM    102  HG  LEU A   6       0.397  -0.971 -52.924  1.00  0.00           H  
ATOM    103 1HD1 LEU A   6      -1.414  -0.990 -54.582  1.00  0.00           H  
ATOM    104 2HD1 LEU A   6      -0.607  -2.572 -54.472  1.00  0.00           H  
ATOM    105 3HD1 LEU A   6      -2.197  -2.329 -53.711  1.00  0.00           H  
ATOM    106 1HD2 LEU A   6      -1.578   0.466 -52.543  1.00  0.00           H  
ATOM    107 2HD2 LEU A   6      -2.365  -0.853 -51.643  1.00  0.00           H  
ATOM    108 3HD2 LEU A   6      -0.887  -0.096 -51.001  1.00  0.00           H  
ATOM    109  N   MET A   7       2.808  -3.165 -51.879  1.00  0.00           N  
ATOM    110  CA  MET A   7       4.141  -2.700 -52.221  1.00  0.00           C  
ATOM    111  C   MET A   7       4.794  -3.626 -53.231  1.00  0.00           C  
ATOM    112  O   MET A   7       5.587  -3.173 -54.055  1.00  0.00           O  
ATOM    113  CB  MET A   7       5.002  -2.587 -50.964  1.00  0.00           C  
ATOM    114  CG  MET A   7       6.340  -1.893 -51.177  1.00  0.00           C  
ATOM    115  SD  MET A   7       6.157  -0.189 -51.741  1.00  0.00           S  
ATOM    116  CE  MET A   7       5.620   0.611 -50.232  1.00  0.00           C  
ATOM    117  H   MET A   7       2.611  -3.437 -50.926  1.00  0.00           H  
ATOM    118  HA  MET A   7       4.057  -1.714 -52.677  1.00  0.00           H  
ATOM    119 1HB  MET A   7       4.458  -2.035 -50.199  1.00  0.00           H  
ATOM    120 2HB  MET A   7       5.202  -3.584 -50.569  1.00  0.00           H  
ATOM    121 1HG  MET A   7       6.900  -1.889 -50.243  1.00  0.00           H  
ATOM    122 2HG  MET A   7       6.920  -2.441 -51.920  1.00  0.00           H  
ATOM    123 1HE  MET A   7       5.464   1.673 -50.419  1.00  0.00           H  
ATOM    124 2HE  MET A   7       4.686   0.160 -49.893  1.00  0.00           H  
ATOM    125 3HE  MET A   7       6.383   0.486 -49.462  1.00  0.00           H  
ATOM    126  N   ILE A   8       4.446  -4.917 -53.204  1.00  0.00           N  
ATOM    127  CA  ILE A   8       4.879  -5.823 -54.266  1.00  0.00           C  
ATOM    128  C   ILE A   8       4.351  -5.337 -55.605  1.00  0.00           C  
ATOM    129  O   ILE A   8       5.069  -5.304 -56.605  1.00  0.00           O  
ATOM    130  CB  ILE A   8       4.395  -7.262 -54.008  1.00  0.00           C  
ATOM    131  CG1 ILE A   8       5.078  -7.841 -52.767  1.00  0.00           C  
ATOM    132  CG2 ILE A   8       4.660  -8.138 -55.223  1.00  0.00           C  
ATOM    133  CD1 ILE A   8       4.473  -9.140 -52.286  1.00  0.00           C  
ATOM    134  H   ILE A   8       3.882  -5.278 -52.449  1.00  0.00           H  
ATOM    135  HA  ILE A   8       5.968  -5.830 -54.293  1.00  0.00           H  
ATOM    136  HB  ILE A   8       3.325  -7.255 -53.804  1.00  0.00           H  
ATOM    137 1HG1 ILE A   8       6.133  -8.013 -52.979  1.00  0.00           H  
ATOM    138 2HG1 ILE A   8       5.024  -7.118 -51.952  1.00  0.00           H  
ATOM    139 1HG2 ILE A   8       4.313  -9.152 -55.023  1.00  0.00           H  
ATOM    140 2HG2 ILE A   8       4.129  -7.736 -56.085  1.00  0.00           H  
ATOM    141 3HG2 ILE A   8       5.730  -8.156 -55.432  1.00  0.00           H  
ATOM    142 1HD1 ILE A   8       5.010  -9.487 -51.403  1.00  0.00           H  
ATOM    143 2HD1 ILE A   8       3.424  -8.981 -52.033  1.00  0.00           H  
ATOM    144 3HD1 ILE A   8       4.548  -9.889 -53.073  1.00  0.00           H  
ATOM    145  N   VAL A   9       3.066  -4.977 -55.627  1.00  0.00           N  
ATOM    146  CA  VAL A   9       2.469  -4.474 -56.859  1.00  0.00           C  
ATOM    147  C   VAL A   9       3.136  -3.173 -57.247  1.00  0.00           C  
ATOM    148  O   VAL A   9       3.426  -2.930 -58.425  1.00  0.00           O  
ATOM    149  CB  VAL A   9       0.956  -4.248 -56.684  1.00  0.00           C  
ATOM    150  CG1 VAL A   9       0.378  -3.544 -57.903  1.00  0.00           C  
ATOM    151  CG2 VAL A   9       0.257  -5.578 -56.449  1.00  0.00           C  
ATOM    152  H   VAL A   9       2.494  -5.048 -54.797  1.00  0.00           H  
ATOM    153  HA  VAL A   9       2.619  -5.216 -57.644  1.00  0.00           H  
ATOM    154  HB  VAL A   9       0.791  -3.594 -55.828  1.00  0.00           H  
ATOM    155 1HG1 VAL A   9      -0.692  -3.392 -57.763  1.00  0.00           H  
ATOM    156 2HG1 VAL A   9       0.867  -2.579 -58.032  1.00  0.00           H  
ATOM    157 3HG1 VAL A   9       0.544  -4.157 -58.789  1.00  0.00           H  
ATOM    158 1HG2 VAL A   9      -0.812  -5.411 -56.325  1.00  0.00           H  
ATOM    159 2HG2 VAL A   9       0.426  -6.235 -57.303  1.00  0.00           H  
ATOM    160 3HG2 VAL A   9       0.657  -6.045 -55.548  1.00  0.00           H  
ATOM    161  N   ILE A  10       3.434  -2.331 -56.269  1.00  0.00           N  
ATOM    162  CA  ILE A  10       4.087  -1.070 -56.573  1.00  0.00           C  
ATOM    163  C   ILE A  10       5.434  -1.337 -57.229  1.00  0.00           C  
ATOM    164  O   ILE A  10       5.789  -0.720 -58.236  1.00  0.00           O  
ATOM    165  CB  ILE A  10       4.279  -0.220 -55.303  1.00  0.00           C  
ATOM    166  CG1 ILE A  10       2.927   0.272 -54.780  1.00  0.00           C  
ATOM    167  CG2 ILE A  10       5.204   0.954 -55.583  1.00  0.00           C  
ATOM    168  CD1 ILE A  10       2.990   0.872 -53.394  1.00  0.00           C  
ATOM    169  H   ILE A  10       3.214  -2.552 -55.308  1.00  0.00           H  
ATOM    170  HA  ILE A  10       3.456  -0.512 -57.264  1.00  0.00           H  
ATOM    171  HB  ILE A  10       4.716  -0.835 -54.517  1.00  0.00           H  
ATOM    172 1HG1 ILE A  10       2.526   1.023 -55.459  1.00  0.00           H  
ATOM    173 2HG1 ILE A  10       2.221  -0.559 -54.758  1.00  0.00           H  
ATOM    174 1HG2 ILE A  10       5.329   1.544 -54.676  1.00  0.00           H  
ATOM    175 2HG2 ILE A  10       6.174   0.582 -55.910  1.00  0.00           H  
ATOM    176 3HG2 ILE A  10       4.772   1.578 -56.366  1.00  0.00           H  
ATOM    177 1HD1 ILE A  10       1.994   1.197 -53.092  1.00  0.00           H  
ATOM    178 2HD1 ILE A  10       3.357   0.124 -52.690  1.00  0.00           H  
ATOM    179 3HD1 ILE A  10       3.664   1.727 -53.398  1.00  0.00           H  
ATOM    180  N   ALA A  11       6.190  -2.283 -56.668  1.00  0.00           N  
ATOM    181  CA  ALA A  11       7.471  -2.652 -57.256  1.00  0.00           C  
ATOM    182  C   ALA A  11       7.292  -3.216 -58.654  1.00  0.00           C  
ATOM    183  O   ALA A  11       8.111  -2.969 -59.544  1.00  0.00           O  
ATOM    184  CB  ALA A  11       8.197  -3.657 -56.363  1.00  0.00           C  
ATOM    185  H   ALA A  11       5.880  -2.753 -55.830  1.00  0.00           H  
ATOM    186  HA  ALA A  11       8.080  -1.751 -57.334  1.00  0.00           H  
ATOM    187 1HB  ALA A  11       9.153  -3.923 -56.815  1.00  0.00           H  
ATOM    188 2HB  ALA A  11       8.371  -3.213 -55.382  1.00  0.00           H  
ATOM    189 3HB  ALA A  11       7.587  -4.552 -56.252  1.00  0.00           H  
ATOM    190  N   ILE A  12       6.225  -3.985 -58.870  1.00  0.00           N  
ATOM    191  CA  ILE A  12       5.961  -4.476 -60.218  1.00  0.00           C  
ATOM    192  C   ILE A  12       5.687  -3.308 -61.150  1.00  0.00           C  
ATOM    193  O   ILE A  12       6.285  -3.204 -62.229  1.00  0.00           O  
ATOM    194  CB  ILE A  12       4.767  -5.448 -60.237  1.00  0.00           C  
ATOM    195  CG1 ILE A  12       5.127  -6.750 -59.517  1.00  0.00           C  
ATOM    196  CG2 ILE A  12       4.333  -5.730 -61.668  1.00  0.00           C  
ATOM    197  CD1 ILE A  12       3.937  -7.635 -59.225  1.00  0.00           C  
ATOM    198  H   ILE A  12       5.593  -4.235 -58.122  1.00  0.00           H  
ATOM    199  HA  ILE A  12       6.842  -5.013 -60.569  1.00  0.00           H  
ATOM    200  HB  ILE A  12       3.931  -5.008 -59.694  1.00  0.00           H  
ATOM    201 1HG1 ILE A  12       5.834  -7.317 -60.121  1.00  0.00           H  
ATOM    202 2HG1 ILE A  12       5.618  -6.519 -58.571  1.00  0.00           H  
ATOM    203 1HG2 ILE A  12       3.489  -6.419 -61.662  1.00  0.00           H  
ATOM    204 2HG2 ILE A  12       4.038  -4.798 -62.148  1.00  0.00           H  
ATOM    205 3HG2 ILE A  12       5.162  -6.176 -62.218  1.00  0.00           H  
ATOM    206 1HD1 ILE A  12       4.271  -8.538 -58.713  1.00  0.00           H  
ATOM    207 2HD1 ILE A  12       3.230  -7.099 -58.591  1.00  0.00           H  
ATOM    208 3HD1 ILE A  12       3.450  -7.909 -60.160  1.00  0.00           H  
ATOM    209  N   VAL A  13       4.808  -2.397 -60.741  1.00  0.00           N  
ATOM    210  CA  VAL A  13       4.487  -1.269 -61.600  1.00  0.00           C  
ATOM    211  C   VAL A  13       5.753  -0.495 -61.924  1.00  0.00           C  
ATOM    212  O   VAL A  13       5.929  -0.022 -63.055  1.00  0.00           O  
ATOM    213  CB  VAL A  13       3.468  -0.337 -60.918  1.00  0.00           C  
ATOM    214  CG1 VAL A  13       3.345   0.970 -61.685  1.00  0.00           C  
ATOM    215  CG2 VAL A  13       2.119  -1.032 -60.815  1.00  0.00           C  
ATOM    216  H   VAL A  13       4.357  -2.474 -59.841  1.00  0.00           H  
ATOM    217  HA  VAL A  13       4.045  -1.651 -62.521  1.00  0.00           H  
ATOM    218  HB  VAL A  13       3.828  -0.091 -59.919  1.00  0.00           H  
ATOM    219 1HG1 VAL A  13       2.621   1.617 -61.189  1.00  0.00           H  
ATOM    220 2HG1 VAL A  13       4.314   1.468 -61.715  1.00  0.00           H  
ATOM    221 3HG1 VAL A  13       3.010   0.765 -62.702  1.00  0.00           H  
ATOM    222 1HG2 VAL A  13       1.404  -0.368 -60.331  1.00  0.00           H  
ATOM    223 2HG2 VAL A  13       1.762  -1.284 -61.814  1.00  0.00           H  
ATOM    224 3HG2 VAL A  13       2.223  -1.944 -60.227  1.00  0.00           H  
ATOM    225  N   GLY A  14       6.634  -0.363 -60.939  1.00  0.00           N  
ATOM    226  CA  GLY A  14       7.830   0.444 -61.086  1.00  0.00           C  
ATOM    227  C   GLY A  14       8.588   0.131 -62.360  1.00  0.00           C  
ATOM    228  O   GLY A  14       9.183   1.014 -62.977  1.00  0.00           O  
ATOM    229  H   GLY A  14       6.466  -0.839 -60.064  1.00  0.00           H  
ATOM    230 1HA  GLY A  14       7.559   1.500 -61.085  1.00  0.00           H  
ATOM    231 2HA  GLY A  14       8.487   0.280 -60.233  1.00  0.00           H  
ATOM    232  N   ILE A  15       8.566  -1.138 -62.761  1.00  0.00           N  
ATOM    233  CA  ILE A  15       9.254  -1.574 -63.968  1.00  0.00           C  
ATOM    234  C   ILE A  15       8.349  -2.447 -64.832  1.00  0.00           C  
ATOM    235  O   ILE A  15       8.811  -3.394 -65.470  1.00  0.00           O  
ATOM    236  CB  ILE A  15      10.537  -2.350 -63.618  1.00  0.00           C  
ATOM    237  CG1 ILE A  15      10.211  -3.540 -62.711  1.00  0.00           C  
ATOM    238  CG2 ILE A  15      11.549  -1.430 -62.951  1.00  0.00           C  
ATOM    239  CD1 ILE A  15      11.372  -4.484 -62.502  1.00  0.00           C  
ATOM    240  H   ILE A  15       8.057  -1.816 -62.212  1.00  0.00           H  
ATOM    241  HA  ILE A  15       9.530  -0.693 -64.546  1.00  0.00           H  
ATOM    242  HB  ILE A  15      10.975  -2.758 -64.528  1.00  0.00           H  
ATOM    243 1HG1 ILE A  15       9.886  -3.176 -61.737  1.00  0.00           H  
ATOM    244 2HG1 ILE A  15       9.384  -4.107 -63.139  1.00  0.00           H  
ATOM    245 1HG2 ILE A  15      12.449  -1.995 -62.710  1.00  0.00           H  
ATOM    246 2HG2 ILE A  15      11.802  -0.616 -63.629  1.00  0.00           H  
ATOM    247 3HG2 ILE A  15      11.121  -1.021 -62.036  1.00  0.00           H  
ATOM    248 1HD1 ILE A  15      11.064  -5.302 -61.850  1.00  0.00           H  
ATOM    249 2HD1 ILE A  15      11.691  -4.888 -63.464  1.00  0.00           H  
ATOM    250 3HD1 ILE A  15      12.200  -3.947 -62.042  1.00  0.00           H  
ATOM    251  N   LEU A  16       7.061  -2.124 -64.847  1.00  0.00           N  
ATOM    252  CA  LEU A  16       6.122  -2.765 -65.759  1.00  0.00           C  
ATOM    253  C   LEU A  16       5.213  -1.742 -66.434  1.00  0.00           C  
ATOM    254  O   LEU A  16       5.017  -1.780 -67.648  1.00  0.00           O  
ATOM    255  CB  LEU A  16       5.271  -3.793 -65.002  1.00  0.00           C  
ATOM    256  CG  LEU A  16       4.226  -4.539 -65.842  1.00  0.00           C  
ATOM    257  CD1 LEU A  16       4.919  -5.272 -66.983  1.00  0.00           C  
ATOM    258  CD2 LEU A  16       3.459  -5.508 -64.955  1.00  0.00           C  
ATOM    259  H   LEU A  16       6.723  -1.416 -64.211  1.00  0.00           H  
ATOM    260  HA  LEU A  16       6.689  -3.280 -66.534  1.00  0.00           H  
ATOM    261 1HB  LEU A  16       5.934  -4.537 -64.563  1.00  0.00           H  
ATOM    262 2HB  LEU A  16       4.745  -3.283 -64.195  1.00  0.00           H  
ATOM    263  HG  LEU A  16       3.531  -3.821 -66.280  1.00  0.00           H  
ATOM    264 1HD1 LEU A  16       4.176  -5.801 -67.579  1.00  0.00           H  
ATOM    265 2HD1 LEU A  16       5.443  -4.552 -67.612  1.00  0.00           H  
ATOM    266 3HD1 LEU A  16       5.633  -5.986 -66.575  1.00  0.00           H  
ATOM    267 1HD2 LEU A  16       2.716  -6.038 -65.551  1.00  0.00           H  
ATOM    268 2HD2 LEU A  16       4.153  -6.227 -64.518  1.00  0.00           H  
ATOM    269 3HD2 LEU A  16       2.960  -4.956 -64.159  1.00  0.00           H  
ATOM    270  N   ALA A  17       4.665  -0.829 -65.639  1.00  0.00           N  
ATOM    271  CA  ALA A  17       3.848   0.258 -66.169  1.00  0.00           C  
ATOM    272  C   ALA A  17       4.488   1.614 -65.893  1.00  0.00           C  
ATOM    273  O   ALA A  17       3.791   2.614 -65.707  1.00  0.00           O  
ATOM    274  CB  ALA A  17       2.445   0.199 -65.586  1.00  0.00           C  
ATOM    275  H   ALA A  17       4.817  -0.889 -64.643  1.00  0.00           H  
ATOM    276  HA  ALA A  17       3.782   0.135 -67.250  1.00  0.00           H  
ATOM    277 1HB  ALA A  17       1.848   1.016 -65.991  1.00  0.00           H  
ATOM    278 2HB  ALA A  17       1.982  -0.753 -65.847  1.00  0.00           H  
ATOM    279 3HB  ALA A  17       2.497   0.291 -64.502  1.00  0.00           H  
ATOM    280  N   ALA A  18       5.817   1.643 -65.867  1.00  0.00           N  
ATOM    281  CA  ALA A  18       6.546   2.883 -65.686  1.00  0.00           C  
ATOM    282  C   ALA A  18       7.942   2.825 -66.281  1.00  0.00           C  
ATOM    283  O   ALA A  18       8.768   2.020 -65.848  1.00  0.00           O  
ATOM    284  CB  ALA A  18       6.624   3.235 -64.209  1.00  0.00           C  
ATOM    285  H   ALA A  18       6.332   0.781 -65.977  1.00  0.00           H  
ATOM    286  HA  ALA A  18       6.008   3.672 -66.210  1.00  0.00           H  
ATOM    287 1HB  ALA A  18       7.174   4.168 -64.085  1.00  0.00           H  
ATOM    288 2HB  ALA A  18       5.616   3.352 -63.809  1.00  0.00           H  
ATOM    289 3HB  ALA A  18       7.136   2.439 -63.671  1.00  0.00           H  
ATOM    290  N   VAL A  19       8.178   3.655 -67.296  1.00  0.00           N  
ATOM    291  CA  VAL A  19       9.409   3.666 -68.108  1.00  0.00           C  
ATOM    292  C   VAL A  19       9.926   2.302 -68.606  1.00  0.00           C  
ATOM    293  O   VAL A  19      11.108   2.152 -68.926  1.00  0.00           O  
ATOM    294  CB  VAL A  19      10.532   4.332 -67.292  1.00  0.00           C  
ATOM    295  CG1 VAL A  19      11.815   4.398 -68.107  1.00  0.00           C  
ATOM    296  CG2 VAL A  19      10.100   5.723 -66.855  1.00  0.00           C  
ATOM    297  H   VAL A  19       7.444   4.316 -67.506  1.00  0.00           H  
ATOM    298  HA  VAL A  19       9.221   4.248 -69.012  1.00  0.00           H  
ATOM    299  HB  VAL A  19      10.741   3.722 -66.413  1.00  0.00           H  
ATOM    300 1HG1 VAL A  19      12.599   4.871 -67.515  1.00  0.00           H  
ATOM    301 2HG1 VAL A  19      12.126   3.389 -68.379  1.00  0.00           H  
ATOM    302 3HG1 VAL A  19      11.643   4.981 -69.011  1.00  0.00           H  
ATOM    303 1HG2 VAL A  19      10.899   6.188 -66.278  1.00  0.00           H  
ATOM    304 2HG2 VAL A  19       9.886   6.331 -67.734  1.00  0.00           H  
ATOM    305 3HG2 VAL A  19       9.204   5.649 -66.238  1.00  0.00           H  
ATOM    306  N   ALA A  20       9.034   1.323 -68.712  1.00  0.00           N  
ATOM    307  CA  ALA A  20       9.424  -0.037 -69.068  1.00  0.00           C  
ATOM    308  C   ALA A  20       9.442  -0.225 -70.583  1.00  0.00           C  
ATOM    309  O   ALA A  20       8.626  -0.964 -71.135  1.00  0.00           O  
ATOM    310  CB  ALA A  20       8.491  -1.046 -68.420  1.00  0.00           C  
ATOM    311  H   ALA A  20       8.059   1.526 -68.542  1.00  0.00           H  
ATOM    312  HA  ALA A  20      10.436  -0.207 -68.699  1.00  0.00           H  
ATOM    313 1HB  ALA A  20       8.797  -2.055 -68.697  1.00  0.00           H  
ATOM    314 2HB  ALA A  20       8.534  -0.937 -67.336  1.00  0.00           H  
ATOM    315 3HB  ALA A  20       7.472  -0.870 -68.762  1.00  0.00           H  
ATOM    316  N   LEU A  21      10.377   0.444 -71.246  1.00  0.00           N  
ATOM    317  CA  LEU A  21      10.508   0.348 -72.696  1.00  0.00           C  
ATOM    318  C   LEU A  21      11.899  -0.134 -73.095  1.00  0.00           C  
ATOM    319  O   LEU A  21      12.711   0.641 -73.603  1.00  0.00           O  
ATOM    320  CB  LEU A  21      10.227   1.710 -73.344  1.00  0.00           C  
ATOM    321  CG  LEU A  21       8.750   2.119 -73.419  1.00  0.00           C  
ATOM    322  CD1 LEU A  21       8.370   2.885 -72.159  1.00  0.00           C  
ATOM    323  CD2 LEU A  21       8.520   2.963 -74.663  1.00  0.00           C  
ATOM    324  H   LEU A  21      11.015   1.035 -70.733  1.00  0.00           H  
ATOM    325  HA  LEU A  21       9.778  -0.372 -73.063  1.00  0.00           H  
ATOM    326 1HB  LEU A  21      10.755   2.478 -72.781  1.00  0.00           H  
ATOM    327 2HB  LEU A  21      10.620   1.699 -74.361  1.00  0.00           H  
ATOM    328  HG  LEU A  21       8.127   1.225 -73.466  1.00  0.00           H  
ATOM    329 1HD1 LEU A  21       7.321   3.175 -72.212  1.00  0.00           H  
ATOM    330 2HD1 LEU A  21       8.527   2.251 -71.287  1.00  0.00           H  
ATOM    331 3HD1 LEU A  21       8.990   3.777 -72.076  1.00  0.00           H  
ATOM    332 1HD2 LEU A  21       7.470   3.253 -74.717  1.00  0.00           H  
ATOM    333 2HD2 LEU A  21       9.141   3.858 -74.616  1.00  0.00           H  
ATOM    334 3HD2 LEU A  21       8.782   2.385 -75.549  1.00  0.00           H  
ATOM    335  N   PRO A  22      12.166  -1.413 -72.862  1.00  0.00           N  
ATOM    336  CA  PRO A  22      13.447  -2.013 -73.244  1.00  0.00           C  
ATOM    337  C   PRO A  22      13.608  -2.045 -74.753  1.00  0.00           C  
ATOM    338  O   PRO A  22      12.853  -2.728 -75.437  1.00  0.00           O  
ATOM    339  CB  PRO A  22      13.360  -3.426 -72.659  1.00  0.00           C  
ATOM    340  CG  PRO A  22      11.897  -3.703 -72.588  1.00  0.00           C  
ATOM    341  CD  PRO A  22      11.284  -2.382 -72.206  1.00  0.00           C  
ATOM    342  HA  PRO A  22      14.266  -1.446 -72.777  1.00  0.00           H  
ATOM    343 1HB  PRO A  22      13.897  -4.135 -73.305  1.00  0.00           H  
ATOM    344 2HB  PRO A  22      13.848  -3.456 -71.673  1.00  0.00           H  
ATOM    345 1HG  PRO A  22      11.533  -4.074 -73.558  1.00  0.00           H  
ATOM    346 2HG  PRO A  22      11.695  -4.493 -71.850  1.00  0.00           H  
ATOM    347 1HD  PRO A  22      10.258  -2.326 -72.598  1.00  0.00           H  
ATOM    348 2HD  PRO A  22      11.287  -2.280 -71.111  1.00  0.00           H  
ATOM    349  N   ALA A  23      14.542  -1.263 -75.284  1.00  0.00           N  
ATOM    350  CA  ALA A  23      14.753  -1.138 -76.721  1.00  0.00           C  
ATOM    351  C   ALA A  23      13.591  -0.645 -77.565  1.00  0.00           C  
ATOM    352  O   ALA A  23      13.614  -0.843 -78.777  1.00  0.00           O  
ATOM    353  CB  ALA A  23      15.179  -2.494 -77.278  1.00  0.00           C  
ATOM    354  H   ALA A  23      15.128  -0.734 -74.653  1.00  0.00           H  
ATOM    355  HA  ALA A  23      15.532  -0.393 -76.886  1.00  0.00           H  
ATOM    356 1HB  ALA A  23      15.339  -2.412 -78.353  1.00  0.00           H  
ATOM    357 2HB  ALA A  23      16.103  -2.812 -76.796  1.00  0.00           H  
ATOM    358 3HB  ALA A  23      14.398  -3.228 -77.083  1.00  0.00           H  
ATOM    359  N   TYR A  24      12.569  -0.026 -76.988  1.00  0.00           N  
ATOM    360  CA  TYR A  24      11.495   0.436 -77.862  1.00  0.00           C  
ATOM    361  C   TYR A  24      11.728   1.872 -78.309  1.00  0.00           C  
ATOM    362  O   TYR A  24      11.124   2.333 -79.284  1.00  0.00           O  
ATOM    363  CB  TYR A  24      10.142   0.313 -77.157  1.00  0.00           C  
ATOM    364  CG  TYR A  24       9.678  -1.115 -76.971  1.00  0.00           C  
ATOM    365  CD1 TYR A  24       9.822  -1.735 -75.738  1.00  0.00           C  
ATOM    366  CD2 TYR A  24       9.110  -1.804 -78.032  1.00  0.00           C  
ATOM    367  CE1 TYR A  24       9.398  -3.039 -75.568  1.00  0.00           C  
ATOM    368  CE2 TYR A  24       8.687  -3.108 -77.861  1.00  0.00           C  
ATOM    369  CZ  TYR A  24       8.829  -3.725 -76.635  1.00  0.00           C  
ATOM    370  OH  TYR A  24       8.408  -5.023 -76.465  1.00  0.00           O  
ATOM    371  H   TYR A  24      12.500   0.138 -75.994  1.00  0.00           H  
ATOM    372  HA  TYR A  24      11.481  -0.190 -78.754  1.00  0.00           H  
ATOM    373 1HB  TYR A  24      10.199   0.784 -76.175  1.00  0.00           H  
ATOM    374 2HB  TYR A  24       9.384   0.844 -77.732  1.00  0.00           H  
ATOM    375  HD1 TYR A  24      10.268  -1.194 -74.904  1.00  0.00           H  
ATOM    376  HD2 TYR A  24       8.998  -1.317 -79.001  1.00  0.00           H  
ATOM    377  HE1 TYR A  24       9.511  -3.526 -74.599  1.00  0.00           H  
ATOM    378  HE2 TYR A  24       8.241  -3.650 -78.696  1.00  0.00           H  
ATOM    379  HH  TYR A  24       8.730  -5.356 -75.624  1.00  0.00           H  
ATOM    380  N   GLN A  25      12.601   2.603 -77.606  1.00  0.00           N  
ATOM    381  CA  GLN A  25      13.087   3.848 -78.181  1.00  0.00           C  
ATOM    382  C   GLN A  25      13.946   3.528 -79.388  1.00  0.00           C  
ATOM    383  O   GLN A  25      13.953   4.270 -80.376  1.00  0.00           O  
ATOM    384  CB  GLN A  25      13.883   4.659 -77.155  1.00  0.00           C  
ATOM    385  CG  GLN A  25      14.309   6.034 -77.642  1.00  0.00           C  
ATOM    386  CD  GLN A  25      13.124   6.927 -77.958  1.00  0.00           C  
ATOM    387  OE1 GLN A  25      12.142   6.967 -77.211  1.00  0.00           O  
ATOM    388  NE2 GLN A  25      13.210   7.651 -79.068  1.00  0.00           N  
ATOM    389  H   GLN A  25      12.932   2.319 -76.695  1.00  0.00           H  
ATOM    390  HA  GLN A  25      12.228   4.443 -78.494  1.00  0.00           H  
ATOM    391 1HB  GLN A  25      13.286   4.791 -76.253  1.00  0.00           H  
ATOM    392 2HB  GLN A  25      14.782   4.109 -76.875  1.00  0.00           H  
ATOM    393 1HG  GLN A  25      14.903   6.515 -76.866  1.00  0.00           H  
ATOM    394 2HG  GLN A  25      14.901   5.919 -78.550  1.00  0.00           H  
ATOM    395 1HE2 GLN A  25      12.459   8.260 -79.328  1.00  0.00           H  
ATOM    396 2HE2 GLN A  25      14.024   7.589 -79.645  1.00  0.00           H  
ATOM    397  N   ASP A  26      14.651   2.403 -79.326  1.00  0.00           N  
ATOM    398  CA  ASP A  26      15.417   1.896 -80.455  1.00  0.00           C  
ATOM    399  C   ASP A  26      14.508   1.484 -81.607  1.00  0.00           C  
ATOM    400  O   ASP A  26      14.905   1.569 -82.776  1.00  0.00           O  
ATOM    401  CB  ASP A  26      16.276   0.705 -80.024  1.00  0.00           C  
ATOM    402  CG  ASP A  26      17.401   1.098 -79.076  1.00  0.00           C  
ATOM    403  OD1 ASP A  26      17.712   2.263 -79.005  1.00  0.00           O  
ATOM    404  OD2 ASP A  26      17.939   0.229 -78.432  1.00  0.00           O  
ATOM    405  H   ASP A  26      14.650   1.884 -78.459  1.00  0.00           H  
ATOM    406  HA  ASP A  26      16.074   2.690 -80.811  1.00  0.00           H  
ATOM    407 1HB  ASP A  26      15.648  -0.037 -79.531  1.00  0.00           H  
ATOM    408 2HB  ASP A  26      16.711   0.232 -80.905  1.00  0.00           H  
ATOM    409  N   TYR A  27      13.294   1.034 -81.307  1.00  0.00           N  
ATOM    410  CA  TYR A  27      12.343   0.755 -82.379  1.00  0.00           C  
ATOM    411  C   TYR A  27      11.947   2.013 -83.129  1.00  0.00           C  
ATOM    412  O   TYR A  27      11.713   1.968 -84.343  1.00  0.00           O  
ATOM    413  CB  TYR A  27      11.097   0.067 -81.819  1.00  0.00           C  
ATOM    414  CG  TYR A  27      11.305  -1.392 -81.480  1.00  0.00           C  
ATOM    415  CD1 TYR A  27      12.591  -1.894 -81.337  1.00  0.00           C  
ATOM    416  CD2 TYR A  27      10.212  -2.229 -81.312  1.00  0.00           C  
ATOM    417  CE1 TYR A  27      12.781  -3.227 -81.027  1.00  0.00           C  
ATOM    418  CE2 TYR A  27      10.402  -3.561 -81.002  1.00  0.00           C  
ATOM    419  CZ  TYR A  27      11.681  -4.061 -80.860  1.00  0.00           C  
ATOM    420  OH  TYR A  27      11.871  -5.388 -80.552  1.00  0.00           O  
ATOM    421  H   TYR A  27      13.015   0.881 -80.349  1.00  0.00           H  
ATOM    422  HA  TYR A  27      12.818   0.087 -83.098  1.00  0.00           H  
ATOM    423 1HB  TYR A  27      10.771   0.583 -80.915  1.00  0.00           H  
ATOM    424 2HB  TYR A  27      10.287   0.135 -82.544  1.00  0.00           H  
ATOM    425  HD1 TYR A  27      13.450  -1.237 -81.469  1.00  0.00           H  
ATOM    426  HD2 TYR A  27       9.202  -1.834 -81.425  1.00  0.00           H  
ATOM    427  HE1 TYR A  27      13.791  -3.621 -80.915  1.00  0.00           H  
ATOM    428  HE2 TYR A  27       9.543  -4.219 -80.871  1.00  0.00           H  
ATOM    429  HH  TYR A  27      11.020  -5.802 -80.385  1.00  0.00           H  
ATOM    430  N   THR A  28      11.864   3.144 -82.418  1.00  0.00           N  
ATOM    431  CA  THR A  28      11.655   4.431 -83.074  1.00  0.00           C  
ATOM    432  C   THR A  28      12.761   4.712 -84.060  1.00  0.00           C  
ATOM    433  O   THR A  28      12.515   5.166 -85.183  1.00  0.00           O  
ATOM    434  CB  THR A  28      11.574   5.580 -82.052  1.00  0.00           C  
ATOM    435  OG1 THR A  28      10.457   5.368 -81.179  1.00  0.00           O  
ATOM    436  CG2 THR A  28      11.411   6.915 -82.762  1.00  0.00           C  
ATOM    437  H   THR A  28      11.946   3.113 -81.411  1.00  0.00           H  
ATOM    438  HA  THR A  28      10.710   4.393 -83.618  1.00  0.00           H  
ATOM    439  HB  THR A  28      12.485   5.601 -81.455  1.00  0.00           H  
ATOM    440  HG1 THR A  28      10.685   4.705 -80.523  1.00  0.00           H  
ATOM    441 1HG2 THR A  28      11.356   7.716 -82.024  1.00  0.00           H  
ATOM    442 2HG2 THR A  28      12.265   7.085 -83.418  1.00  0.00           H  
ATOM    443 3HG2 THR A  28      10.496   6.904 -83.353  1.00  0.00           H  
ATOM    444  N   ALA A  29      13.990   4.405 -83.655  1.00  0.00           N  
ATOM    445  CA  ALA A  29      15.151   4.559 -84.509  1.00  0.00           C  
ATOM    446  C   ALA A  29      15.074   3.663 -85.730  1.00  0.00           C  
ATOM    447  O   ALA A  29      15.488   4.055 -86.821  1.00  0.00           O  
ATOM    448  CB  ALA A  29      16.408   4.243 -83.716  1.00  0.00           C  
ATOM    449  H   ALA A  29      14.112   4.052 -82.716  1.00  0.00           H  
ATOM    450  HA  ALA A  29      15.179   5.591 -84.860  1.00  0.00           H  
ATOM    451 1HB  ALA A  29      17.281   4.359 -84.358  1.00  0.00           H  
ATOM    452 2HB  ALA A  29      16.486   4.926 -82.870  1.00  0.00           H  
ATOM    453 3HB  ALA A  29      16.359   3.218 -83.351  1.00  0.00           H  
ATOM    454  N   ARG A  30      14.538   2.457 -85.549  1.00  0.00           N  
ATOM    455  CA  ARG A  30      14.331   1.543 -86.666  1.00  0.00           C  
ATOM    456  C   ARG A  30      13.443   2.174 -87.726  1.00  0.00           C  
ATOM    457  O   ARG A  30      13.725   2.087 -88.922  1.00  0.00           O  
ATOM    458  CB  ARG A  30      13.701   0.242 -86.189  1.00  0.00           C  
ATOM    459  CG  ARG A  30      14.609  -0.635 -85.342  1.00  0.00           C  
ATOM    460  CD  ARG A  30      13.860  -1.750 -84.708  1.00  0.00           C  
ATOM    461  NE  ARG A  30      13.516  -2.787 -85.668  1.00  0.00           N  
ATOM    462  CZ  ARG A  30      12.478  -3.636 -85.537  1.00  0.00           C  
ATOM    463  NH1 ARG A  30      11.694  -3.559 -84.485  1.00  0.00           N  
ATOM    464  NH2 ARG A  30      12.247  -4.546 -86.468  1.00  0.00           N  
ATOM    465  H   ARG A  30      14.268   2.168 -84.620  1.00  0.00           H  
ATOM    466  HA  ARG A  30      15.300   1.315 -87.111  1.00  0.00           H  
ATOM    467 1HB  ARG A  30      12.813   0.464 -85.598  1.00  0.00           H  
ATOM    468 2HB  ARG A  30      13.383  -0.346 -87.050  1.00  0.00           H  
ATOM    469 1HG  ARG A  30      15.392  -1.061 -85.970  1.00  0.00           H  
ATOM    470 2HG  ARG A  30      15.064  -0.035 -84.553  1.00  0.00           H  
ATOM    471 1HD  ARG A  30      14.471  -2.200 -83.926  1.00  0.00           H  
ATOM    472 2HD  ARG A  30      12.938  -1.368 -84.274  1.00  0.00           H  
ATOM    473  HE  ARG A  30      14.096  -2.877 -86.491  1.00  0.00           H  
ATOM    474 1HH1 ARG A  30      11.870  -2.863 -83.774  1.00  0.00           H  
ATOM    475 2HH1 ARG A  30      10.916  -4.195 -84.387  1.00  0.00           H  
ATOM    476 1HH2 ARG A  30      12.850  -4.605 -87.277  1.00  0.00           H  
ATOM    477 2HH2 ARG A  30      11.470  -5.182 -86.370  1.00  0.00           H  
ATOM    478  N   ALA A  31      12.388   2.858 -87.290  1.00  0.00           N  
ATOM    479  CA  ALA A  31      11.537   3.568 -88.236  1.00  0.00           C  
ATOM    480  C   ALA A  31      12.315   4.665 -88.945  1.00  0.00           C  
ATOM    481  O   ALA A  31      12.197   4.841 -90.163  1.00  0.00           O  
ATOM    482  CB  ALA A  31      10.330   4.154 -87.512  1.00  0.00           C  
ATOM    483  H   ALA A  31      12.166   2.894 -86.306  1.00  0.00           H  
ATOM    484  HA  ALA A  31      11.196   2.855 -88.986  1.00  0.00           H  
ATOM    485 1HB  ALA A  31       9.699   4.683 -88.226  1.00  0.00           H  
ATOM    486 2HB  ALA A  31       9.758   3.350 -87.048  1.00  0.00           H  
ATOM    487 3HB  ALA A  31      10.668   4.848 -86.744  1.00  0.00           H  
ATOM    488  N   GLN A  32      13.119   5.408 -88.184  1.00  0.00           N  
ATOM    489  CA  GLN A  32      13.905   6.497 -88.753  1.00  0.00           C  
ATOM    490  C   GLN A  32      14.788   5.988 -89.879  1.00  0.00           C  
ATOM    491  O   GLN A  32      14.883   6.616 -90.940  1.00  0.00           O  
ATOM    492  CB  GLN A  32      14.761   7.166 -87.675  1.00  0.00           C  
ATOM    493  CG  GLN A  32      13.964   7.927 -86.629  1.00  0.00           C  
ATOM    494  CD  GLN A  32      14.849   8.545 -85.564  1.00  0.00           C  
ATOM    495  OE1 GLN A  32      15.725   7.882 -85.003  1.00  0.00           O  
ATOM    496  NE2 GLN A  32      14.624   9.823 -85.277  1.00  0.00           N  
ATOM    497  H   GLN A  32      13.188   5.216 -87.195  1.00  0.00           H  
ATOM    498  HA  GLN A  32      13.220   7.239 -89.162  1.00  0.00           H  
ATOM    499 1HB  GLN A  32      15.355   6.411 -87.161  1.00  0.00           H  
ATOM    500 2HB  GLN A  32      15.455   7.865 -88.143  1.00  0.00           H  
ATOM    501 1HG  GLN A  32      13.410   8.727 -87.121  1.00  0.00           H  
ATOM    502 2HG  GLN A  32      13.273   7.239 -86.143  1.00  0.00           H  
ATOM    503 1HE2 GLN A  32      15.176  10.285 -84.582  1.00  0.00           H  
ATOM    504 2HE2 GLN A  32      13.903  10.323 -85.756  1.00  0.00           H  
ATOM    505  N   VAL A  33      15.422   4.831 -89.680  1.00  0.00           N  
ATOM    506  CA  VAL A  33      16.329   4.302 -90.693  1.00  0.00           C  
ATOM    507  C   VAL A  33      15.563   3.999 -91.970  1.00  0.00           C  
ATOM    508  O   VAL A  33      15.993   4.342 -93.075  1.00  0.00           O  
ATOM    509  CB  VAL A  33      17.020   3.020 -90.189  1.00  0.00           C  
ATOM    510  CG1 VAL A  33      17.785   2.348 -91.319  1.00  0.00           C  
ATOM    511  CG2 VAL A  33      17.949   3.354 -89.032  1.00  0.00           C  
ATOM    512  H   VAL A  33      15.281   4.311 -88.826  1.00  0.00           H  
ATOM    513  HA  VAL A  33      17.095   5.051 -90.897  1.00  0.00           H  
ATOM    514  HB  VAL A  33      16.259   2.316 -89.853  1.00  0.00           H  
ATOM    515 1HG1 VAL A  33      18.267   1.444 -90.946  1.00  0.00           H  
ATOM    516 2HG1 VAL A  33      17.095   2.086 -92.121  1.00  0.00           H  
ATOM    517 3HG1 VAL A  33      18.544   3.031 -91.702  1.00  0.00           H  
ATOM    518 1HG2 VAL A  33      18.434   2.443 -88.681  1.00  0.00           H  
ATOM    519 2HG2 VAL A  33      18.707   4.062 -89.367  1.00  0.00           H  
ATOM    520 3HG2 VAL A  33      17.374   3.795 -88.219  1.00  0.00           H  
ATOM    521  N   SER A  34      14.405   3.357 -91.828  1.00  0.00           N  
ATOM    522  CA  SER A  34      13.660   2.904 -92.997  1.00  0.00           C  
ATOM    523  C   SER A  34      13.235   4.065 -93.873  1.00  0.00           C  
ATOM    524  O   SER A  34      13.139   3.916 -95.093  1.00  0.00           O  
ATOM    525  CB  SER A  34      12.437   2.119 -92.563  1.00  0.00           C  
ATOM    526  OG  SER A  34      11.491   2.957 -91.958  1.00  0.00           O  
ATOM    527  H   SER A  34      14.032   3.178 -90.907  1.00  0.00           H  
ATOM    528  HA  SER A  34      14.305   2.253 -93.588  1.00  0.00           H  
ATOM    529 1HB  SER A  34      11.992   1.631 -93.430  1.00  0.00           H  
ATOM    530 2HB  SER A  34      12.735   1.338 -91.865  1.00  0.00           H  
ATOM    531  HG  SER A  34      11.991   3.574 -91.418  1.00  0.00           H  
ATOM    532  N   GLU A  35      12.983   5.224 -93.268  1.00  0.00           N  
ATOM    533  CA  GLU A  35      12.415   6.332 -94.022  1.00  0.00           C  
ATOM    534  C   GLU A  35      13.428   6.888 -95.004  1.00  0.00           C  
ATOM    535  O   GLU A  35      13.062   7.495 -96.020  1.00  0.00           O  
ATOM    536  CB  GLU A  35      11.942   7.439 -93.077  1.00  0.00           C  
ATOM    537  CG  GLU A  35      10.690   7.096 -92.283  1.00  0.00           C  
ATOM    538  CD  GLU A  35      10.224   8.226 -91.407  1.00  0.00           C  
ATOM    539  OE1 GLU A  35      11.010   8.714 -90.632  1.00  0.00           O  
ATOM    540  OE2 GLU A  35       9.080   8.601 -91.514  1.00  0.00           O  
ATOM    541  H   GLU A  35      13.181   5.348 -92.285  1.00  0.00           H  
ATOM    542  HA  GLU A  35      11.556   5.964 -94.583  1.00  0.00           H  
ATOM    543 1HB  GLU A  35      12.734   7.675 -92.367  1.00  0.00           H  
ATOM    544 2HB  GLU A  35      11.737   8.343 -93.651  1.00  0.00           H  
ATOM    545 1HG  GLU A  35       9.891   6.837 -92.977  1.00  0.00           H  
ATOM    546 2HG  GLU A  35      10.893   6.223 -91.664  1.00  0.00           H  
ATOM    547  N   ALA A  36      14.711   6.669 -94.727  1.00  0.00           N  
ATOM    548  CA  ALA A  36      15.749   7.222 -95.588  1.00  0.00           C  
ATOM    549  C   ALA A  36      15.672   6.631 -96.990  1.00  0.00           C  
ATOM    550  O   ALA A  36      15.687   7.378 -97.975  1.00  0.00           O  
ATOM    551  CB  ALA A  36      17.132   6.986 -94.977  1.00  0.00           C  
ATOM    552  H   ALA A  36      14.980   6.120 -93.923  1.00  0.00           H  
ATOM    553  HA  ALA A  36      15.584   8.296 -95.669  1.00  0.00           H  
ATOM    554 1HB  ALA A  36      17.895   7.405 -95.633  1.00  0.00           H  
ATOM    555 2HB  ALA A  36      17.186   7.469 -94.002  1.00  0.00           H  
ATOM    556 3HB  ALA A  36      17.300   5.916 -94.862  1.00  0.00           H  
ATOM    557  N   ILE A  37      15.572   5.302 -97.097  1.00  0.00           N  
ATOM    558  CA  ILE A  37      15.490   4.677 -98.411  1.00  0.00           C  
ATOM    559  C   ILE A  37      14.125   4.913 -99.025  1.00  0.00           C  
ATOM    560  O   ILE A  37      14.000   5.128-100.236  1.00  0.00           O  
ATOM    561  CB  ILE A  37      15.763   3.164 -98.326  1.00  0.00           C  
ATOM    562  CG1 ILE A  37      17.231   2.906 -97.976  1.00  0.00           C  
ATOM    563  CG2 ILE A  37      15.397   2.483 -99.636  1.00  0.00           C  
ATOM    564  CD1 ILE A  37      18.206   3.449 -98.995  1.00  0.00           C  
ATOM    565  H   ILE A  37      15.552   4.719 -96.273  1.00  0.00           H  
ATOM    566  HA  ILE A  37      16.245   5.125 -99.055  1.00  0.00           H  
ATOM    567  HB  ILE A  37      15.167   2.731 -97.524  1.00  0.00           H  
ATOM    568 1HG1 ILE A  37      17.459   3.356 -97.011  1.00  0.00           H  
ATOM    569 2HG1 ILE A  37      17.399   1.832 -97.883  1.00  0.00           H  
ATOM    570 1HG2 ILE A  37      15.597   1.415 -99.559  1.00  0.00           H  
ATOM    571 2HG2 ILE A  37      14.339   2.640 -99.844  1.00  0.00           H  
ATOM    572 3HG2 ILE A  37      15.993   2.907-100.445  1.00  0.00           H  
ATOM    573 1HD1 ILE A  37      19.226   3.226 -98.678  1.00  0.00           H  
ATOM    574 2HD1 ILE A  37      18.018   2.984 -99.964  1.00  0.00           H  
ATOM    575 3HD1 ILE A  37      18.081   4.527 -99.080  1.00  0.00           H  
ATOM    576  N   LEU A  38      13.086   4.921 -98.199  1.00  0.00           N  
ATOM    577  CA  LEU A  38      11.741   5.126 -98.704  1.00  0.00           C  
ATOM    578  C   LEU A  38      11.593   6.448 -99.440  1.00  0.00           C  
ATOM    579  O   LEU A  38      10.856   6.526-100.428  1.00  0.00           O  
ATOM    580  CB  LEU A  38      10.737   5.072 -97.545  1.00  0.00           C  
ATOM    581  CG  LEU A  38      10.527   3.692 -96.911  1.00  0.00           C  
ATOM    582  CD1 LEU A  38       9.666   3.832 -95.663  1.00  0.00           C  
ATOM    583  CD2 LEU A  38       9.876   2.761 -97.923  1.00  0.00           C  
ATOM    584  H   LEU A  38      13.225   4.784 -97.208  1.00  0.00           H  
ATOM    585  HA  LEU A  38      11.511   4.329 -99.409  1.00  0.00           H  
ATOM    586 1HB  LEU A  38      11.074   5.749 -96.762  1.00  0.00           H  
ATOM    587 2HB  LEU A  38       9.770   5.421 -97.907  1.00  0.00           H  
ATOM    588  HG  LEU A  38      11.490   3.281 -96.606  1.00  0.00           H  
ATOM    589 1HD1 LEU A  38       9.517   2.850 -95.212  1.00  0.00           H  
ATOM    590 2HD1 LEU A  38      10.164   4.487 -94.948  1.00  0.00           H  
ATOM    591 3HD1 LEU A  38       8.700   4.256 -95.934  1.00  0.00           H  
ATOM    592 1HD2 LEU A  38       9.728   1.779 -97.472  1.00  0.00           H  
ATOM    593 2HD2 LEU A  38       8.912   3.170 -98.227  1.00  0.00           H  
ATOM    594 3HD2 LEU A  38      10.521   2.665 -98.796  1.00  0.00           H  
ATOM    595  N   LEU A  39      12.288   7.491 -98.996  1.00  0.00           N  
ATOM    596  CA  LEU A  39      12.249   8.732 -99.755  1.00  0.00           C  
ATOM    597  C   LEU A  39      13.169   8.687-100.972  1.00  0.00           C  
ATOM    598  O   LEU A  39      12.846   9.259-102.018  1.00  0.00           O  
ATOM    599  CB  LEU A  39      12.645   9.908 -98.853  1.00  0.00           C  
ATOM    600  CG  LEU A  39      11.670  10.229 -97.713  1.00  0.00           C  
ATOM    601  CD1 LEU A  39      12.247  11.343 -96.850  1.00  0.00           C  
ATOM    602  CD2 LEU A  39      10.323  10.629 -98.294  1.00  0.00           C  
ATOM    603  H   LEU A  39      12.839   7.448 -98.150  1.00  0.00           H  
ATOM    604  HA  LEU A  39      11.231   8.887-100.112  1.00  0.00           H  
ATOM    605 1HB  LEU A  39      13.615   9.693 -98.409  1.00  0.00           H  
ATOM    606 2HB  LEU A  39      12.740  10.802 -99.469  1.00  0.00           H  
ATOM    607  HG  LEU A  39      11.546   9.349 -97.081  1.00  0.00           H  
ATOM    608 1HD1 LEU A  39      11.555  11.571 -96.039  1.00  0.00           H  
ATOM    609 2HD1 LEU A  39      13.202  11.023 -96.432  1.00  0.00           H  
ATOM    610 3HD1 LEU A  39      12.398  12.234 -97.459  1.00  0.00           H  
ATOM    611 1HD2 LEU A  39       9.630  10.857 -97.483  1.00  0.00           H  
ATOM    612 2HD2 LEU A  39      10.445  11.510 -98.924  1.00  0.00           H  
ATOM    613 3HD2 LEU A  39       9.925   9.808 -98.891  1.00  0.00           H  
ATOM    614  N   ALA A  40      14.318   8.011-100.856  1.00  0.00           N  
ATOM    615  CA  ALA A  40      15.265   7.893-101.967  1.00  0.00           C  
ATOM    616  C   ALA A  40      14.886   6.805-102.954  1.00  0.00           C  
ATOM    617  O   ALA A  40      15.494   6.715-104.027  1.00  0.00           O  
ATOM    618  CB  ALA A  40      16.668   7.616-101.428  1.00  0.00           C  
ATOM    619  H   ALA A  40      14.537   7.570 -99.974  1.00  0.00           H  
ATOM    620  HA  ALA A  40      15.263   8.834-102.516  1.00  0.00           H  
ATOM    621 1HB  ALA A  40      17.367   7.529-102.260  1.00  0.00           H  
ATOM    622 2HB  ALA A  40      16.977   8.436-100.779  1.00  0.00           H  
ATOM    623 3HB  ALA A  40      16.663   6.687-100.861  1.00  0.00           H  
ATOM    624  N   GLU A  41      13.918   5.972-102.591  1.00  0.00           N  
ATOM    625  CA  GLU A  41      13.534   4.819-103.389  1.00  0.00           C  
ATOM    626  C   GLU A  41      13.143   5.223-104.805  1.00  0.00           C  
ATOM    627  O   GLU A  41      13.337   4.459-105.754  1.00  0.00           O  
ATOM    628  CB  GLU A  41      12.373   4.077-102.721  1.00  0.00           C  
ATOM    629  CG  GLU A  41      11.937   2.812-103.446  1.00  0.00           C  
ATOM    630  CD  GLU A  41      10.887   2.041-102.695  1.00  0.00           C  
ATOM    631  OE1 GLU A  41      10.614   2.386-101.570  1.00  0.00           O  
ATOM    632  OE2 GLU A  41      10.357   1.105-103.247  1.00  0.00           O  
ATOM    633  H   GLU A  41      13.433   6.154-101.724  1.00  0.00           H  
ATOM    634  HA  GLU A  41      14.388   4.145-103.457  1.00  0.00           H  
ATOM    635 1HB  GLU A  41      12.655   3.800-101.705  1.00  0.00           H  
ATOM    636 2HB  GLU A  41      11.510   4.738-102.653  1.00  0.00           H  
ATOM    637 1HG  GLU A  41      11.541   3.084-104.424  1.00  0.00           H  
ATOM    638 2HG  GLU A  41      12.807   2.175-103.600  1.00  0.00           H  
ATOM    639  N   GLY A  42      12.599   6.430-104.968  1.00  0.00           N  
ATOM    640  CA  GLY A  42      12.063   6.815-106.259  1.00  0.00           C  
ATOM    641  C   GLY A  42      13.091   6.766-107.370  1.00  0.00           C  
ATOM    642  O   GLY A  42      12.734   6.663-108.544  1.00  0.00           O  
ATOM    643  H   GLY A  42      12.554   7.086-104.201  1.00  0.00           H  
ATOM    644 1HA  GLY A  42      11.235   6.156-106.520  1.00  0.00           H  
ATOM    645 2HA  GLY A  42      11.662   7.826-106.200  1.00  0.00           H  
ATOM    646  N   GLN A  43      14.376   6.823-107.016  1.00  0.00           N  
ATOM    647  CA  GLN A  43      15.419   6.867-108.032  1.00  0.00           C  
ATOM    648  C   GLN A  43      15.474   5.565-108.818  1.00  0.00           C  
ATOM    649  O   GLN A  43      16.009   5.529-109.933  1.00  0.00           O  
ATOM    650  CB  GLN A  43      16.781   7.149-107.392  1.00  0.00           C  
ATOM    651  CG  GLN A  43      16.926   8.553-106.831  1.00  0.00           C  
ATOM    652  CD  GLN A  43      18.349   8.864-106.409  1.00  0.00           C  
ATOM    653  OE1 GLN A  43      19.100   7.972-106.002  1.00  0.00           O  
ATOM    654  NE2 GLN A  43      18.730  10.133-106.504  1.00  0.00           N  
ATOM    655  H   GLN A  43      14.638   6.837-106.041  1.00  0.00           H  
ATOM    656  HA  GLN A  43      15.189   7.672-108.730  1.00  0.00           H  
ATOM    657 1HB  GLN A  43      16.955   6.443-106.581  1.00  0.00           H  
ATOM    658 2HB  GLN A  43      17.568   6.999-108.131  1.00  0.00           H  
ATOM    659 1HG  GLN A  43      16.632   9.272-107.596  1.00  0.00           H  
ATOM    660 2HG  GLN A  43      16.281   8.653-105.958  1.00  0.00           H  
ATOM    661 1HE2 GLN A  43      19.659  10.398-106.239  1.00  0.00           H  
ATOM    662 2HE2 GLN A  43      18.090  10.824-106.839  1.00  0.00           H  
ATOM    663  N   LYS A  44      14.913   4.496-108.254  1.00  0.00           N  
ATOM    664  CA  LYS A  44      14.951   3.168-108.851  1.00  0.00           C  
ATOM    665  C   LYS A  44      14.332   3.123-110.236  1.00  0.00           C  
ATOM    666  O   LYS A  44      14.615   2.195-111.004  1.00  0.00           O  
ATOM    667  CB  LYS A  44      14.244   2.164-107.940  1.00  0.00           C  
ATOM    668  CG  LYS A  44      12.728   2.304-107.905  1.00  0.00           C  
ATOM    669  CD  LYS A  44      12.105   1.327-106.919  1.00  0.00           C  
ATOM    670  CE  LYS A  44      10.586   1.409-106.943  1.00  0.00           C  
ATOM    671  NZ  LYS A  44       9.963   0.476-105.965  1.00  0.00           N  
ATOM    672  H   LYS A  44      14.440   4.625-107.371  1.00  0.00           H  
ATOM    673  HA  LYS A  44      15.994   2.869-108.963  1.00  0.00           H  
ATOM    674 1HB  LYS A  44      14.478   1.150-108.265  1.00  0.00           H  
ATOM    675 2HB  LYS A  44      14.614   2.274-106.920  1.00  0.00           H  
ATOM    676 1HG  LYS A  44      12.463   3.321-107.612  1.00  0.00           H  
ATOM    677 2HG  LYS A  44      12.322   2.114-108.898  1.00  0.00           H  
ATOM    678 1HD  LYS A  44      12.410   0.311-107.173  1.00  0.00           H  
ATOM    679 2HD  LYS A  44      12.456   1.552-105.912  1.00  0.00           H  
ATOM    680 1HE  LYS A  44      10.273   2.425-106.707  1.00  0.00           H  
ATOM    681 2HE  LYS A  44      10.223   1.163-107.941  1.00  0.00           H  
ATOM    682 1HZ  LYS A  44       8.957   0.561-106.011  1.00  0.00           H  
ATOM    683 2HZ  LYS A  44      10.231  -0.472-106.185  1.00  0.00           H  
ATOM    684 3HZ  LYS A  44      10.276   0.706-105.032  1.00  0.00           H  
ATOM    685  N   SER A  45      13.491   4.095-110.569  1.00  0.00           N  
ATOM    686  CA  SER A  45      12.883   4.148-111.889  1.00  0.00           C  
ATOM    687  C   SER A  45      13.908   4.423-112.976  1.00  0.00           C  
ATOM    688  O   SER A  45      13.980   3.691-113.964  1.00  0.00           O  
ATOM    689  CB  SER A  45      11.808   5.217-111.921  1.00  0.00           C  
ATOM    690  OG  SER A  45      11.207   5.287-113.185  1.00  0.00           O  
ATOM    691  H   SER A  45      13.267   4.814-109.895  1.00  0.00           H  
ATOM    692  HA  SER A  45      12.426   3.180-112.099  1.00  0.00           H  
ATOM    693 1HB  SER A  45      11.052   4.995-111.168  1.00  0.00           H  
ATOM    694 2HB  SER A  45      12.246   6.182-111.670  1.00  0.00           H  
ATOM    695  HG  SER A  45      11.907   5.117-113.821  1.00  0.00           H  
ATOM    696  N   ALA A  46      14.714   5.467-112.792  1.00  0.00           N  
ATOM    697  CA  ALA A  46      15.710   5.803-113.800  1.00  0.00           C  
ATOM    698  C   ALA A  46      16.855   4.809-113.764  1.00  0.00           C  
ATOM    699  O   ALA A  46      17.445   4.488-114.799  1.00  0.00           O  
ATOM    700  CB  ALA A  46      16.219   7.227-113.594  1.00  0.00           C  
ATOM    701  H   ALA A  46      14.646   6.035-111.959  1.00  0.00           H  
ATOM    702  HA  ALA A  46      15.235   5.744-114.779  1.00  0.00           H  
ATOM    703 1HB  ALA A  46      16.962   7.461-114.356  1.00  0.00           H  
ATOM    704 2HB  ALA A  46      15.386   7.926-113.673  1.00  0.00           H  
ATOM    705 3HB  ALA A  46      16.671   7.312-112.608  1.00  0.00           H  
ATOM    706  N   VAL A  47      17.168   4.313-112.570  1.00  0.00           N  
ATOM    707  CA  VAL A  47      18.194   3.292-112.421  1.00  0.00           C  
ATOM    708  C   VAL A  47      17.795   2.034-113.177  1.00  0.00           C  
ATOM    709  O   VAL A  47      18.599   1.440-113.906  1.00  0.00           O  
ATOM    710  CB  VAL A  47      18.410   2.954-110.933  1.00  0.00           C  
ATOM    711  CG1 VAL A  47      19.303   1.731-110.789  1.00  0.00           C  
ATOM    712  CG2 VAL A  47      19.013   4.151-110.213  1.00  0.00           C  
ATOM    713  H   VAL A  47      16.686   4.650-111.748  1.00  0.00           H  
ATOM    714  HA  VAL A  47      19.129   3.678-112.829  1.00  0.00           H  
ATOM    715  HB  VAL A  47      17.448   2.705-110.484  1.00  0.00           H  
ATOM    716 1HG1 VAL A  47      19.445   1.507-109.731  1.00  0.00           H  
ATOM    717 2HG1 VAL A  47      18.835   0.879-111.281  1.00  0.00           H  
ATOM    718 3HG1 VAL A  47      20.270   1.931-111.249  1.00  0.00           H  
ATOM    719 1HG2 VAL A  47      19.162   3.905-109.162  1.00  0.00           H  
ATOM    720 2HG2 VAL A  47      19.971   4.403-110.667  1.00  0.00           H  
ATOM    721 3HG2 VAL A  47      18.337   5.002-110.294  1.00  0.00           H  
ATOM    722  N   THR A  48      16.537   1.629-113.031  1.00  0.00           N  
ATOM    723  CA  THR A  48      16.063   0.457-113.751  1.00  0.00           C  
ATOM    724  C   THR A  48      16.046   0.729-115.244  1.00  0.00           C  
ATOM    725  O   THR A  48      16.440  -0.120-116.043  1.00  0.00           O  
ATOM    726  CB  THR A  48      14.657   0.040-113.281  1.00  0.00           C  
ATOM    727  OG1 THR A  48      14.696  -0.295-111.888  1.00  0.00           O  
ATOM    728  CG2 THR A  48      14.165  -1.162-114.074  1.00  0.00           C  
ATOM    729  H   THR A  48      15.900   2.124-112.424  1.00  0.00           H  
ATOM    730  HA  THR A  48      16.746  -0.369-113.556  1.00  0.00           H  
ATOM    731  HB  THR A  48      13.965   0.869-113.423  1.00  0.00           H  
ATOM    732  HG1 THR A  48      14.678   0.511-111.366  1.00  0.00           H  
ATOM    733 1HG2 THR A  48      13.170  -1.443-113.728  1.00  0.00           H  
ATOM    734 2HG2 THR A  48      14.123  -0.907-115.133  1.00  0.00           H  
ATOM    735 3HG2 THR A  48      14.848  -1.998-113.929  1.00  0.00           H  
ATOM    736  N   GLU A  49      15.620   1.930-115.634  1.00  0.00           N  
ATOM    737  CA  GLU A  49      15.574   2.319-117.041  1.00  0.00           C  
ATOM    738  C   GLU A  49      16.911   2.102-117.715  1.00  0.00           C  
ATOM    739  O   GLU A  49      17.000   1.440-118.752  1.00  0.00           O  
ATOM    740  CB  GLU A  49      15.161   3.786-117.178  1.00  0.00           C  
ATOM    741  CG  GLU A  49      15.087   4.287-118.614  1.00  0.00           C  
ATOM    742  CD  GLU A  49      14.732   5.744-118.708  1.00  0.00           C  
ATOM    743  OE1 GLU A  49      14.522   6.352-117.686  1.00  0.00           O  
ATOM    744  OE2 GLU A  49      14.670   6.251-119.804  1.00  0.00           O  
ATOM    745  H   GLU A  49      15.319   2.589-114.931  1.00  0.00           H  
ATOM    746  HA  GLU A  49      14.833   1.700-117.547  1.00  0.00           H  
ATOM    747 1HB  GLU A  49      14.181   3.933-116.722  1.00  0.00           H  
ATOM    748 2HB  GLU A  49      15.869   4.416-116.641  1.00  0.00           H  
ATOM    749 1HG  GLU A  49      16.052   4.128-119.093  1.00  0.00           H  
ATOM    750 2HG  GLU A  49      14.344   3.701-119.154  1.00  0.00           H  
ATOM    751  N   TYR A  50      17.964   2.682-117.144  1.00  0.00           N  
ATOM    752  CA  TYR A  50      19.293   2.513-117.701  1.00  0.00           C  
ATOM    753  C   TYR A  50      19.666   1.043-117.707  1.00  0.00           C  
ATOM    754  O   TYR A  50      20.162   0.511-118.705  1.00  0.00           O  
ATOM    755  CB  TYR A  50      20.322   3.327-116.912  1.00  0.00           C  
ATOM    756  CG  TYR A  50      21.731   3.218-117.452  1.00  0.00           C  
ATOM    757  CD1 TYR A  50      22.182   4.124-118.401  1.00  0.00           C  
ATOM    758  CD2 TYR A  50      22.571   2.213-116.999  1.00  0.00           C  
ATOM    759  CE1 TYR A  50      23.468   4.025-118.894  1.00  0.00           C  
ATOM    760  CE2 TYR A  50      23.858   2.113-117.492  1.00  0.00           C  
ATOM    761  CZ  TYR A  50      24.306   3.015-118.436  1.00  0.00           C  
ATOM    762  OH  TYR A  50      25.588   2.916-118.928  1.00  0.00           O  
ATOM    763  H   TYR A  50      17.846   3.246-116.314  1.00  0.00           H  
ATOM    764  HA  TYR A  50      19.285   2.872-118.730  1.00  0.00           H  
ATOM    765 1HB  TYR A  50      20.035   4.380-116.918  1.00  0.00           H  
ATOM    766 2HB  TYR A  50      20.329   2.996-115.874  1.00  0.00           H  
ATOM    767  HD1 TYR A  50      21.521   4.915-118.757  1.00  0.00           H  
ATOM    768  HD2 TYR A  50      22.217   1.500-116.254  1.00  0.00           H  
ATOM    769  HE1 TYR A  50      23.822   4.737-119.639  1.00  0.00           H  
ATOM    770  HE2 TYR A  50      24.518   1.322-117.137  1.00  0.00           H  
ATOM    771  HH  TYR A  50      25.850   1.992-118.950  1.00  0.00           H  
ATOM    772  N   TYR A  51      19.403   0.356-116.596  1.00  0.00           N  
ATOM    773  CA  TYR A  51      19.778  -1.045-116.501  1.00  0.00           C  
ATOM    774  C   TYR A  51      19.204  -1.827-117.669  1.00  0.00           C  
ATOM    775  O   TYR A  51      19.928  -2.538-118.373  1.00  0.00           O  
ATOM    776  CB  TYR A  51      19.306  -1.644-115.174  1.00  0.00           C  
ATOM    777  CG  TYR A  51      19.387  -3.154-115.122  1.00  0.00           C  
ATOM    778  CD1 TYR A  51      20.624  -3.781-115.089  1.00  0.00           C  
ATOM    779  CD2 TYR A  51      18.225  -3.910-115.109  1.00  0.00           C  
ATOM    780  CE1 TYR A  51      20.698  -5.160-115.041  1.00  0.00           C  
ATOM    781  CE2 TYR A  51      18.299  -5.289-115.062  1.00  0.00           C  
ATOM    782  CZ  TYR A  51      19.530  -5.913-115.028  1.00  0.00           C  
ATOM    783  OH  TYR A  51      19.604  -7.286-114.981  1.00  0.00           O  
ATOM    784  H   TYR A  51      18.943   0.796-115.811  1.00  0.00           H  
ATOM    785  HA  TYR A  51      20.865  -1.116-116.547  1.00  0.00           H  
ATOM    786 1HB  TYR A  51      19.909  -1.242-114.359  1.00  0.00           H  
ATOM    787 2HB  TYR A  51      18.272  -1.353-114.991  1.00  0.00           H  
ATOM    788  HD1 TYR A  51      21.537  -3.186-115.099  1.00  0.00           H  
ATOM    789  HD2 TYR A  51      17.253  -3.418-115.137  1.00  0.00           H  
ATOM    790  HE1 TYR A  51      21.670  -5.652-115.014  1.00  0.00           H  
ATOM    791  HE2 TYR A  51      17.386  -5.884-115.052  1.00  0.00           H  
ATOM    792  HH  TYR A  51      20.525  -7.555-114.947  1.00  0.00           H  
ATOM    793  N   LEU A  52      17.909  -1.688-117.897  1.00  0.00           N  
ATOM    794  CA  LEU A  52      17.225  -2.503-118.882  1.00  0.00           C  
ATOM    795  C   LEU A  52      17.644  -2.095-120.276  1.00  0.00           C  
ATOM    796  O   LEU A  52      17.838  -2.943-121.149  1.00  0.00           O  
ATOM    797  CB  LEU A  52      15.705  -2.367-118.731  1.00  0.00           C  
ATOM    798  CG  LEU A  52      15.105  -2.982-117.461  1.00  0.00           C  
ATOM    799  CD1 LEU A  52      13.620  -2.651-117.388  1.00  0.00           C  
ATOM    800  CD2 LEU A  52      15.330  -4.487-117.470  1.00  0.00           C  
ATOM    801  H   LEU A  52      17.383  -1.001-117.376  1.00  0.00           H  
ATOM    802  HA  LEU A  52      17.499  -3.544-118.719  1.00  0.00           H  
ATOM    803 1HB  LEU A  52      15.448  -1.308-118.739  1.00  0.00           H  
ATOM    804 2HB  LEU A  52      15.227  -2.842-119.588  1.00  0.00           H  
ATOM    805  HG  LEU A  52      15.586  -2.549-116.584  1.00  0.00           H  
ATOM    806 1HD1 LEU A  52      13.194  -3.089-116.485  1.00  0.00           H  
ATOM    807 2HD1 LEU A  52      13.489  -1.569-117.363  1.00  0.00           H  
ATOM    808 3HD1 LEU A  52      13.114  -3.059-118.262  1.00  0.00           H  
ATOM    809 1HD2 LEU A  52      14.904  -4.924-116.567  1.00  0.00           H  
ATOM    810 2HD2 LEU A  52      14.848  -4.921-118.346  1.00  0.00           H  
ATOM    811 3HD2 LEU A  52      16.399  -4.694-117.504  1.00  0.00           H  
ATOM    812  N   ASN A  53      17.757  -0.786-120.487  1.00  0.00           N  
ATOM    813  CA  ASN A  53      18.001  -0.268-121.820  1.00  0.00           C  
ATOM    814  C   ASN A  53      19.411  -0.613-122.282  1.00  0.00           C  
ATOM    815  O   ASN A  53      19.639  -0.923-123.451  1.00  0.00           O  
ATOM    816  CB  ASN A  53      17.771   1.232-121.862  1.00  0.00           C  
ATOM    817  CG  ASN A  53      16.312   1.593-121.847  1.00  0.00           C  
ATOM    818  OD1 ASN A  53      15.451   0.761-122.155  1.00  0.00           O  
ATOM    819  ND2 ASN A  53      16.018   2.818-121.494  1.00  0.00           N  
ATOM    820  H   ASN A  53      17.673  -0.139-119.715  1.00  0.00           H  
ATOM    821  HA  ASN A  53      17.304  -0.746-122.511  1.00  0.00           H  
ATOM    822 1HB  ASN A  53      18.259   1.699-121.005  1.00  0.00           H  
ATOM    823 2HB  ASN A  53      18.227   1.644-122.763  1.00  0.00           H  
ATOM    824 1HD2 ASN A  53      15.063   3.115-121.466  1.00  0.00           H  
ATOM    825 2HD2 ASN A  53      16.747   3.458-121.253  1.00  0.00           H  
ATOM    826  N   HIS A  54      20.359  -0.617-121.350  1.00  0.00           N  
ATOM    827  CA  HIS A  54      21.760  -0.817-121.692  1.00  0.00           C  
ATOM    828  C   HIS A  54      22.257  -2.194-121.283  1.00  0.00           C  
ATOM    829  O   HIS A  54      23.344  -2.616-121.698  1.00  0.00           O  
ATOM    830  CB  HIS A  54      22.631   0.256-121.031  1.00  0.00           C  
ATOM    831  CG  HIS A  54      22.365   1.641-121.535  1.00  0.00           C  
ATOM    832  ND1 HIS A  54      21.256   2.369-121.157  1.00  0.00           N  
ATOM    833  CD2 HIS A  54      23.062   2.430-122.386  1.00  0.00           C  
ATOM    834  CE1 HIS A  54      21.284   3.548-121.755  1.00  0.00           C  
ATOM    835  NE2 HIS A  54      22.369   3.609-122.505  1.00  0.00           N  
ATOM    836  H   HIS A  54      20.103  -0.479-120.383  1.00  0.00           H  
ATOM    837  HA  HIS A  54      21.886  -0.739-122.772  1.00  0.00           H  
ATOM    838 1HB  HIS A  54      22.465   0.247-119.954  1.00  0.00           H  
ATOM    839 2HB  HIS A  54      23.683   0.028-121.203  1.00  0.00           H  
ATOM    840  HD2 HIS A  54      23.998   2.177-122.884  1.00  0.00           H  
ATOM    841  HE1 HIS A  54      20.539   4.336-121.646  1.00  0.00           H  
ATOM    842  HE2 HIS A  54      22.648   4.394-123.077  1.00  0.00           H  
ATOM    843  N   GLY A  55      21.477  -2.904-120.475  1.00  0.00           N  
ATOM    844  CA  GLY A  55      21.841  -4.229-120.037  1.00  0.00           C  
ATOM    845  C   GLY A  55      22.942  -4.230-119.003  1.00  0.00           C  
ATOM    846  O   GLY A  55      23.716  -5.197-118.937  1.00  0.00           O  
ATOM    847  H   GLY A  55      20.606  -2.504-120.159  1.00  0.00           H  
ATOM    848 1HA  GLY A  55      20.966  -4.726-119.618  1.00  0.00           H  
ATOM    849 2HA  GLY A  55      22.165  -4.819-120.894  1.00  0.00           H  
ATOM    850  N   GLU A  56      23.044  -3.169-118.205  1.00  0.00           N  
ATOM    851  CA  GLU A  56      24.115  -2.985-117.240  1.00  0.00           C  
ATOM    852  C   GLU A  56      23.683  -1.959-116.208  1.00  0.00           C  
ATOM    853  O   GLU A  56      23.010  -0.985-116.536  1.00  0.00           O  
ATOM    854  CB  GLU A  56      25.405  -2.536-117.929  1.00  0.00           C  
ATOM    855  CG  GLU A  56      25.340  -1.144-118.541  1.00  0.00           C  
ATOM    856  CD  GLU A  56      26.654  -0.695-119.117  1.00  0.00           C  
ATOM    857  OE1 GLU A  56      27.508  -1.525-119.315  1.00  0.00           O  
ATOM    858  OE2 GLU A  56      26.803   0.479-119.361  1.00  0.00           O  
ATOM    859  H   GLU A  56      22.330  -2.459-118.288  1.00  0.00           H  
ATOM    860  HA  GLU A  56      24.303  -3.940-116.746  1.00  0.00           H  
ATOM    861 1HB  GLU A  56      26.225  -2.548-117.211  1.00  0.00           H  
ATOM    862 2HB  GLU A  56      25.657  -3.239-118.724  1.00  0.00           H  
ATOM    863 1HG  GLU A  56      24.589  -1.140-119.331  1.00  0.00           H  
ATOM    864 2HG  GLU A  56      25.024  -0.437-117.774  1.00  0.00           H  
ATOM    865  N   TRP A  57      24.094  -2.164-114.965  1.00  0.00           N  
ATOM    866  CA  TRP A  57      23.666  -1.250-113.936  1.00  0.00           C  
ATOM    867  C   TRP A  57      24.397   0.069-114.098  1.00  0.00           C  
ATOM    868  O   TRP A  57      25.544   0.100-114.542  1.00  0.00           O  
ATOM    869  CB  TRP A  57      23.931  -1.835-112.547  1.00  0.00           C  
ATOM    870  CG  TRP A  57      23.070  -3.018-112.222  1.00  0.00           C  
ATOM    871  CD1 TRP A  57      23.435  -4.330-112.269  1.00  0.00           C  
ATOM    872  CD2 TRP A  57      21.686  -3.002-111.794  1.00  0.00           C  
ATOM    873  NE1 TRP A  57      22.379  -5.128-111.903  1.00  0.00           N  
ATOM    874  CE2 TRP A  57      21.302  -4.332-111.607  1.00  0.00           C  
ATOM    875  CE3 TRP A  57      20.758  -1.980-111.557  1.00  0.00           C  
ATOM    876  CZ2 TRP A  57      20.024  -4.675-111.195  1.00  0.00           C  
ATOM    877  CZ3 TRP A  57      19.477  -2.324-111.142  1.00  0.00           C  
ATOM    878  CH2 TRP A  57      19.120  -3.638-110.966  1.00  0.00           C  
ATOM    879  H   TRP A  57      24.695  -2.937-114.718  1.00  0.00           H  
ATOM    880  HA  TRP A  57      22.594  -1.086-114.043  1.00  0.00           H  
ATOM    881 1HB  TRP A  57      24.975  -2.141-112.474  1.00  0.00           H  
ATOM    882 2HB  TRP A  57      23.761  -1.069-111.791  1.00  0.00           H  
ATOM    883  HD1 TRP A  57      24.421  -4.692-112.555  1.00  0.00           H  
ATOM    884  HE1 TRP A  57      22.392  -6.137-111.859  1.00  0.00           H  
ATOM    885  HE3 TRP A  57      21.037  -0.936-111.692  1.00  0.00           H  
ATOM    886  HZ2 TRP A  57      19.721  -5.713-111.050  1.00  0.00           H  
ATOM    887  HZ3 TRP A  57      18.760  -1.523-110.961  1.00  0.00           H  
ATOM    888  HH2 TRP A  57      18.107  -3.872-110.639  1.00  0.00           H  
ATOM    889  N   PRO A  58      23.746   1.174-113.791  1.00  0.00           N  
ATOM    890  CA  PRO A  58      24.395   2.467-113.971  1.00  0.00           C  
ATOM    891  C   PRO A  58      25.518   2.610-112.968  1.00  0.00           C  
ATOM    892  O   PRO A  58      25.352   2.299-111.789  1.00  0.00           O  
ATOM    893  CB  PRO A  58      23.270   3.474-113.715  1.00  0.00           C  
ATOM    894  CG  PRO A  58      22.320   2.744-112.828  1.00  0.00           C  
ATOM    895  CD  PRO A  58      22.362   1.323-113.324  1.00  0.00           C  
ATOM    896  HA  PRO A  58      24.761   2.547-115.005  1.00  0.00           H  
ATOM    897 1HB  PRO A  58      23.677   4.383-113.247  1.00  0.00           H  
ATOM    898 2HB  PRO A  58      22.814   3.780-114.668  1.00  0.00           H  
ATOM    899 1HG  PRO A  58      22.635   2.835-111.778  1.00  0.00           H  
ATOM    900 2HG  PRO A  58      21.316   3.188-112.899  1.00  0.00           H  
ATOM    901 1HD  PRO A  58      22.142   0.637-112.493  1.00  0.00           H  
ATOM    902 2HD  PRO A  58      21.631   1.196-114.136  1.00  0.00           H  
ATOM    903  N   GLY A  59      26.661   3.097-113.450  1.00  0.00           N  
ATOM    904  CA  GLY A  59      27.828   3.181-112.601  1.00  0.00           C  
ATOM    905  C   GLY A  59      27.702   4.273-111.567  1.00  0.00           C  
ATOM    906  O   GLY A  59      28.047   4.075-110.401  1.00  0.00           O  
ATOM    907  H   GLY A  59      26.725   3.413-114.408  1.00  0.00           H  
ATOM    908 1HA  GLY A  59      27.981   2.226-112.098  1.00  0.00           H  
ATOM    909 2HA  GLY A  59      28.710   3.366-113.213  1.00  0.00           H  
ATOM    910  N   ASP A  60      27.155   5.408-111.957  1.00  0.00           N  
ATOM    911  CA  ASP A  60      27.035   6.540-111.060  1.00  0.00           C  
ATOM    912  C   ASP A  60      25.741   7.274-111.377  1.00  0.00           C  
ATOM    913  O   ASP A  60      24.888   6.787-112.133  1.00  0.00           O  
ATOM    914  CB  ASP A  60      28.233   7.483-111.198  1.00  0.00           C  
ATOM    915  CG  ASP A  60      28.329   8.121-112.578  1.00  0.00           C  
ATOM    916  OD1 ASP A  60      27.315   8.254-113.221  1.00  0.00           O  
ATOM    917  OD2 ASP A  60      29.416   8.469-112.974  1.00  0.00           O  
ATOM    918  H   ASP A  60      26.811   5.491-112.903  1.00  0.00           H  
ATOM    919  HA  ASP A  60      27.008   6.168-110.036  1.00  0.00           H  
ATOM    920 1HB  ASP A  60      28.160   8.275-110.452  1.00  0.00           H  
ATOM    921 2HB  ASP A  60      29.154   6.933-111.003  1.00  0.00           H  
ATOM    922  N   ASN A  61      25.623   8.455-110.776  1.00  0.00           N  
ATOM    923  CA  ASN A  61      24.403   9.241-110.807  1.00  0.00           C  
ATOM    924  C   ASN A  61      24.140   9.835-112.183  1.00  0.00           C  
ATOM    925  O   ASN A  61      22.986  10.053-112.568  1.00  0.00           O  
ATOM    926  CB  ASN A  61      24.458  10.337-109.758  1.00  0.00           C  
ATOM    927  CG  ASN A  61      24.492   9.795-108.357  1.00  0.00           C  
ATOM    928  OD1 ASN A  61      23.813   8.811-108.042  1.00  0.00           O  
ATOM    929  ND2 ASN A  61      25.271  10.417-107.509  1.00  0.00           N  
ATOM    930  H   ASN A  61      26.426   8.811-110.278  1.00  0.00           H  
ATOM    931  HA  ASN A  61      23.561   8.584-110.583  1.00  0.00           H  
ATOM    932 1HB  ASN A  61      25.345  10.952-109.920  1.00  0.00           H  
ATOM    933 2HB  ASN A  61      23.588  10.985-109.863  1.00  0.00           H  
ATOM    934 1HD2 ASN A  61      25.334  10.100-106.562  1.00  0.00           H  
ATOM    935 2HD2 ASN A  61      25.803  11.209-107.807  1.00  0.00           H  
ATOM    936  N   SER A  62      25.204  10.109-112.939  1.00  0.00           N  
ATOM    937  CA  SER A  62      25.055  10.645-114.286  1.00  0.00           C  
ATOM    938  C   SER A  62      24.722   9.558-115.298  1.00  0.00           C  
ATOM    939  O   SER A  62      24.131   9.844-116.347  1.00  0.00           O  
ATOM    940  CB  SER A  62      26.327  11.357-114.704  1.00  0.00           C  
ATOM    941  OG  SER A  62      27.374  10.445-114.893  1.00  0.00           O  
ATOM    942  H   SER A  62      26.132   9.944-112.575  1.00  0.00           H  
ATOM    943  HA  SER A  62      24.233  11.363-114.285  1.00  0.00           H  
ATOM    944 1HB  SER A  62      26.150  11.907-115.627  1.00  0.00           H  
ATOM    945 2HB  SER A  62      26.606  12.081-113.940  1.00  0.00           H  
ATOM    946  HG  SER A  62      27.213   9.726-114.276  1.00  0.00           H  
ATOM    947  N   SER A  63      25.131   8.320-115.030  1.00  0.00           N  
ATOM    948  CA  SER A  63      24.732   7.211-115.886  1.00  0.00           C  
ATOM    949  C   SER A  63      23.330   6.749-115.528  1.00  0.00           C  
ATOM    950  O   SER A  63      22.562   6.314-116.390  1.00  0.00           O  
ATOM    951  CB  SER A  63      25.709   6.059-115.750  1.00  0.00           C  
ATOM    952  OG  SER A  63      25.660   5.509-114.462  1.00  0.00           O  
ATOM    953  H   SER A  63      25.721   8.138-114.232  1.00  0.00           H  
ATOM    954  HA  SER A  63      24.738   7.553-116.922  1.00  0.00           H  
ATOM    955 1HB  SER A  63      25.471   5.291-116.486  1.00  0.00           H  
ATOM    956 2HB  SER A  63      26.718   6.411-115.960  1.00  0.00           H  
ATOM    957  HG  SER A  63      25.355   6.213-113.885  1.00  0.00           H  
ATOM    958  N   ALA A  64      22.963   6.884-114.254  1.00  0.00           N  
ATOM    959  CA  ALA A  64      21.607   6.551-113.843  1.00  0.00           C  
ATOM    960  C   ALA A  64      20.626   7.627-114.260  1.00  0.00           C  
ATOM    961  O   ALA A  64      19.462   7.332-114.554  1.00  0.00           O  
ATOM    962  CB  ALA A  64      21.544   6.353-112.330  1.00  0.00           C  
ATOM    963  H   ALA A  64      23.619   7.217-113.562  1.00  0.00           H  
ATOM    964  HA  ALA A  64      21.319   5.626-114.343  1.00  0.00           H  
ATOM    965 1HB  ALA A  64      20.524   6.104-112.037  1.00  0.00           H  
ATOM    966 2HB  ALA A  64      22.212   5.541-112.041  1.00  0.00           H  
ATOM    967 3HB  ALA A  64      21.851   7.270-111.830  1.00  0.00           H  
ATOM    968  N   GLY A  65      21.076   8.875-114.302  1.00  0.00           N  
ATOM    969  CA  GLY A  65      20.191   9.981-114.577  1.00  0.00           C  
ATOM    970  C   GLY A  65      19.393  10.439-113.386  1.00  0.00           C  
ATOM    971  O   GLY A  65      18.231  10.822-113.549  1.00  0.00           O  
ATOM    972  H   GLY A  65      22.056   9.058-114.139  1.00  0.00           H  
ATOM    973 1HA  GLY A  65      20.770  10.828-114.945  1.00  0.00           H  
ATOM    974 2HA  GLY A  65      19.494   9.701-115.366  1.00  0.00           H  
ATOM    975  N   VAL A  66      19.977  10.408-112.194  1.00  0.00           N  
ATOM    976  CA  VAL A  66      19.223  10.702-110.982  1.00  0.00           C  
ATOM    977  C   VAL A  66      19.865  11.835-110.201  1.00  0.00           C  
ATOM    978  O   VAL A  66      20.911  12.364-110.587  1.00  0.00           O  
ATOM    979  CB  VAL A  66      19.136   9.451-110.088  1.00  0.00           C  
ATOM    980  CG1 VAL A  66      18.439   8.317-110.825  1.00  0.00           C  
ATOM    981  CG2 VAL A  66      20.530   9.031-109.647  1.00  0.00           C  
ATOM    982  H   VAL A  66      20.958  10.178-112.119  1.00  0.00           H  
ATOM    983  HA  VAL A  66      18.213  10.999-111.267  1.00  0.00           H  
ATOM    984  HB  VAL A  66      18.531   9.684-109.211  1.00  0.00           H  
ATOM    985 1HG1 VAL A  66      18.385   7.441-110.178  1.00  0.00           H  
ATOM    986 2HG1 VAL A  66      17.430   8.627-111.099  1.00  0.00           H  
ATOM    987 3HG1 VAL A  66      19.001   8.068-111.725  1.00  0.00           H  
ATOM    988 1HG2 VAL A  66      20.460   8.147-109.014  1.00  0.00           H  
ATOM    989 2HG2 VAL A  66      21.136   8.804-110.524  1.00  0.00           H  
ATOM    990 3HG2 VAL A  66      20.993   9.843-109.086  1.00  0.00           H  
ATOM    991  N   ALA A  67      19.232  12.193-109.085  1.00  0.00           N  
ATOM    992  CA  ALA A  67      19.731  13.243-108.209  1.00  0.00           C  
ATOM    993  C   ALA A  67      20.992  12.807-107.476  1.00  0.00           C  
ATOM    994  O   ALA A  67      21.127  11.649-107.074  1.00  0.00           O  
ATOM    995  CB  ALA A  67      18.646  13.626-107.212  1.00  0.00           C  
ATOM    996  H   ALA A  67      18.375  11.715-108.843  1.00  0.00           H  
ATOM    997  HA  ALA A  67      19.989  14.104-108.825  1.00  0.00           H  
ATOM    998 1HB  ALA A  67      19.017  14.412-106.554  1.00  0.00           H  
ATOM    999 2HB  ALA A  67      17.769  13.987-107.749  1.00  0.00           H  
ATOM   1000 3HB  ALA A  67      18.374  12.755-106.618  1.00  0.00           H  
ATOM   1001  N   THR A  68      21.895  13.757-107.252  1.00  0.00           N  
ATOM   1002  CA  THR A  68      23.195  13.485-106.655  1.00  0.00           C  
ATOM   1003  C   THR A  68      23.173  13.639-105.136  1.00  0.00           C  
ATOM   1004  O   THR A  68      22.135  13.904-104.523  1.00  0.00           O  
ATOM   1005  CB  THR A  68      24.273  14.410-107.250  1.00  0.00           C  
ATOM   1006  OG1 THR A  68      24.003  15.766-106.872  1.00  0.00           O  
ATOM   1007  CG2 THR A  68      24.288  14.304-108.767  1.00  0.00           C  
ATOM   1008  H   THR A  68      21.660  14.705-107.509  1.00  0.00           H  
ATOM   1009  HA  THR A  68      23.467  12.452-106.874  1.00  0.00           H  
ATOM   1010  HB  THR A  68      25.251  14.126-106.862  1.00  0.00           H  
ATOM   1011  HG1 THR A  68      23.210  16.071-107.319  1.00  0.00           H  
ATOM   1012 1HG2 THR A  68      25.056  14.964-109.170  1.00  0.00           H  
ATOM   1013 2HG2 THR A  68      24.504  13.276-109.058  1.00  0.00           H  
ATOM   1014 3HG2 THR A  68      23.316  14.596-109.162  1.00  0.00           H  
ATOM   1015  N   SER A  69      24.350  13.462-104.529  1.00  0.00           N  
ATOM   1016  CA  SER A  69      24.492  13.444-103.076  1.00  0.00           C  
ATOM   1017  C   SER A  69      23.779  14.625-102.439  1.00  0.00           C  
ATOM   1018  O   SER A  69      22.860  14.460-101.627  1.00  0.00           O  
ATOM   1019  CB  SER A  69      25.959  13.464-102.693  1.00  0.00           C  
ATOM   1020  OG  SER A  69      26.114  13.515-101.302  1.00  0.00           O  
ATOM   1021  H   SER A  69      25.170  13.337-105.105  1.00  0.00           H  
ATOM   1022  HA  SER A  69      24.042  12.526-102.696  1.00  0.00           H  
ATOM   1023 1HB  SER A  69      26.449  12.572-103.084  1.00  0.00           H  
ATOM   1024 2HB  SER A  69      26.442  14.328-103.148  1.00  0.00           H  
ATOM   1025  HG  SER A  69      26.806  14.160-101.136  1.00  0.00           H  
ATOM   1026  N   ALA A  70      24.165  15.831-102.840  1.00  0.00           N  
ATOM   1027  CA  ALA A  70      23.648  17.054-102.251  1.00  0.00           C  
ATOM   1028  C   ALA A  70      22.266  17.402-102.772  1.00  0.00           C  
ATOM   1029  O   ALA A  70      21.575  18.232-102.174  1.00  0.00           O  
ATOM   1030  CB  ALA A  70      24.608  18.218-102.511  1.00  0.00           C  
ATOM   1031  H   ALA A  70      24.846  15.893-103.584  1.00  0.00           H  
ATOM   1032  HA  ALA A  70      23.559  16.900-101.175  1.00  0.00           H  
ATOM   1033 1HB  ALA A  70      24.206  19.127-102.064  1.00  0.00           H  
ATOM   1034 2HB  ALA A  70      25.579  17.995-102.070  1.00  0.00           H  
ATOM   1035 3HB  ALA A  70      24.721  18.362-103.585  1.00  0.00           H  
ATOM   1036  N   ASP A  71      21.846  16.795-103.868  1.00  0.00           N  
ATOM   1037  CA  ASP A  71      20.476  16.961-104.292  1.00  0.00           C  
ATOM   1038  C   ASP A  71      19.566  16.240-103.326  1.00  0.00           C  
ATOM   1039  O   ASP A  71      19.751  16.288-102.111  1.00  0.00           O  
ATOM   1040  CB  ASP A  71      20.265  16.456-105.702  1.00  0.00           C  
ATOM   1041  CG  ASP A  71      21.045  17.236-106.690  1.00  0.00           C  
ATOM   1042  OD1 ASP A  71      21.099  18.470-106.507  1.00  0.00           O  
ATOM   1043  OD2 ASP A  71      21.576  16.641-107.641  1.00  0.00           O  
ATOM   1044  H   ASP A  71      22.465  16.215-104.418  1.00  0.00           H  
ATOM   1045  HA  ASP A  71      20.239  18.025-104.289  1.00  0.00           H  
ATOM   1046 1HB  ASP A  71      20.558  15.407-105.760  1.00  0.00           H  
ATOM   1047 2HB  ASP A  71      19.205  16.514-105.954  1.00  0.00           H  
ATOM   1048  N   ILE A  72      18.661  15.462-103.898  1.00  0.00           N  
ATOM   1049  CA  ILE A  72      17.537  14.849-103.208  1.00  0.00           C  
ATOM   1050  C   ILE A  72      17.799  14.634-101.722  1.00  0.00           C  
ATOM   1051  O   ILE A  72      18.712  13.896-101.339  1.00  0.00           O  
ATOM   1052  CB  ILE A  72      17.182  13.499-103.858  1.00  0.00           C  
ATOM   1053  CG1 ILE A  72      15.919  12.915-103.219  1.00  0.00           C  
ATOM   1054  CG2 ILE A  72      18.344  12.526-103.734  1.00  0.00           C  
ATOM   1055  CD1 ILE A  72      15.334  11.747-103.980  1.00  0.00           C  
ATOM   1056  H   ILE A  72      18.780  15.297-104.887  1.00  0.00           H  
ATOM   1057  HA  ILE A  72      16.677  15.513-103.289  1.00  0.00           H  
ATOM   1058  HB  ILE A  72      16.959  13.651-104.914  1.00  0.00           H  
ATOM   1059 1HG1 ILE A  72      16.144  12.584-102.206  1.00  0.00           H  
ATOM   1060 2HG1 ILE A  72      15.156  13.690-103.147  1.00  0.00           H  
ATOM   1061 1HG2 ILE A  72      18.076  11.577-104.198  1.00  0.00           H  
ATOM   1062 2HG2 ILE A  72      19.219  12.940-104.233  1.00  0.00           H  
ATOM   1063 3HG2 ILE A  72      18.571  12.363-102.680  1.00  0.00           H  
ATOM   1064 1HD1 ILE A  72      14.442  11.388-103.466  1.00  0.00           H  
ATOM   1065 2HD1 ILE A  72      15.069  12.065-104.988  1.00  0.00           H  
ATOM   1066 3HD1 ILE A  72      16.068  10.944-104.034  1.00  0.00           H  
ATOM   1067  N   LYS A  73      16.993  15.283-100.875  1.00  0.00           N  
ATOM   1068  CA  LYS A  73      17.147  15.231 -99.422  1.00  0.00           C  
ATOM   1069  C   LYS A  73      15.893  15.715 -98.713  1.00  0.00           C  
ATOM   1070  O   LYS A  73      15.016  16.360 -99.294  1.00  0.00           O  
ATOM   1071  CB  LYS A  73      18.351  16.064 -98.980  1.00  0.00           C  
ATOM   1072  CG  LYS A  73      18.255  17.544 -99.329  1.00  0.00           C  
ATOM   1073  CD  LYS A  73      19.527  18.285 -98.948  1.00  0.00           C  
ATOM   1074  CE  LYS A  73      19.434  19.763 -99.300  1.00  0.00           C  
ATOM   1075  NZ  LYS A  73      20.677  20.499 -98.942  1.00  0.00           N  
ATOM   1076  H   LYS A  73      16.245  15.833-101.271  1.00  0.00           H  
ATOM   1077  HA  LYS A  73      17.315  14.194 -99.129  1.00  0.00           H  
ATOM   1078 1HB  LYS A  73      18.473  15.983 -97.899  1.00  0.00           H  
ATOM   1079 2HB  LYS A  73      19.256  15.670 -99.442  1.00  0.00           H  
ATOM   1080 1HG  LYS A  73      18.086  17.655-100.401  1.00  0.00           H  
ATOM   1081 2HG  LYS A  73      17.413  17.988 -98.799  1.00  0.00           H  
ATOM   1082 1HD  LYS A  73      19.699  18.186 -97.875  1.00  0.00           H  
ATOM   1083 2HD  LYS A  73      20.375  17.849 -99.476  1.00  0.00           H  
ATOM   1084 1HE  LYS A  73      19.258  19.871-100.369  1.00  0.00           H  
ATOM   1085 2HE  LYS A  73      18.595  20.211 -98.769  1.00  0.00           H  
ATOM   1086 1HZ  LYS A  73      20.575  21.473 -99.190  1.00  0.00           H  
ATOM   1087 2HZ  LYS A  73      20.840  20.421 -97.948  1.00  0.00           H  
ATOM   1088 3HZ  LYS A  73      21.459  20.105 -99.444  1.00  0.00           H  
ATOM   1089  N   GLY A  74      15.852  15.381 -97.423  1.00  0.00           N  
ATOM   1090  CA  GLY A  74      14.728  15.702 -96.555  1.00  0.00           C  
ATOM   1091  C   GLY A  74      14.799  14.895 -95.270  1.00  0.00           C  
ATOM   1092  O   GLY A  74      15.851  14.800 -94.629  1.00  0.00           O  
ATOM   1093  H   GLY A  74      16.643  14.882 -97.041  1.00  0.00           H  
ATOM   1094 1HA  GLY A  74      14.736  16.768 -96.327  1.00  0.00           H  
ATOM   1095 2HA  GLY A  74      13.794  15.492 -97.076  1.00  0.00           H  
ATOM   1096  N   LYS A  75      13.656  14.308 -94.908  1.00  0.00           N  
ATOM   1097  CA  LYS A  75      13.529  13.644 -93.619  1.00  0.00           C  
ATOM   1098  C   LYS A  75      14.490  12.478 -93.499  1.00  0.00           C  
ATOM   1099  O   LYS A  75      14.291  11.426 -94.107  1.00  0.00           O  
ATOM   1100  CB  LYS A  75      12.093  13.162 -93.403  1.00  0.00           C  
ATOM   1101  CG  LYS A  75      11.804  12.656 -91.997  1.00  0.00           C  
ATOM   1102  CD  LYS A  75      10.367  12.175 -91.867  1.00  0.00           C  
ATOM   1103  CE  LYS A  75      10.019  11.850 -90.421  1.00  0.00           C  
ATOM   1104  NZ  LYS A  75       8.684  11.204 -90.302  1.00  0.00           N  
ATOM   1105  H   LYS A  75      12.863  14.321 -95.534  1.00  0.00           H  
ATOM   1106  HA  LYS A  75      13.777  14.360 -92.835  1.00  0.00           H  
ATOM   1107 1HB  LYS A  75      11.400  13.977 -93.615  1.00  0.00           H  
ATOM   1108 2HB  LYS A  75      11.872  12.354 -94.102  1.00  0.00           H  
ATOM   1109 1HG  LYS A  75      12.477  11.831 -91.761  1.00  0.00           H  
ATOM   1110 2HG  LYS A  75      11.976  13.458 -91.279  1.00  0.00           H  
ATOM   1111 1HD  LYS A  75       9.689  12.949 -92.230  1.00  0.00           H  
ATOM   1112 2HD  LYS A  75      10.226  11.281 -92.474  1.00  0.00           H  
ATOM   1113 1HE  LYS A  75      10.772  11.181 -90.008  1.00  0.00           H  
ATOM   1114 2HE  LYS A  75      10.018  12.768 -89.833  1.00  0.00           H  
ATOM   1115 1HZ  LYS A  75       8.491  11.006 -89.330  1.00  0.00           H  
ATOM   1116 2HZ  LYS A  75       7.975  11.825 -90.665  1.00  0.00           H  
ATOM   1117 3HZ  LYS A  75       8.678  10.342 -90.828  1.00  0.00           H  
ATOM   1118  N   TYR A  76      15.540  12.679 -92.705  1.00  0.00           N  
ATOM   1119  CA  TYR A  76      16.552  11.662 -92.469  1.00  0.00           C  
ATOM   1120  C   TYR A  76      17.269  11.261 -93.744  1.00  0.00           C  
ATOM   1121  O   TYR A  76      17.762  10.139 -93.853  1.00  0.00           O  
ATOM   1122  CB  TYR A  76      15.922  10.432 -91.813  1.00  0.00           C  
ATOM   1123  CG  TYR A  76      15.169  10.738 -90.537  1.00  0.00           C  
ATOM   1124  CD1 TYR A  76      13.926  10.165 -90.310  1.00  0.00           C  
ATOM   1125  CD2 TYR A  76      15.720  11.593 -89.595  1.00  0.00           C  
ATOM   1126  CE1 TYR A  76      13.238  10.445 -89.146  1.00  0.00           C  
ATOM   1127  CE2 TYR A  76      15.032  11.873 -88.430  1.00  0.00           C  
ATOM   1128  CZ  TYR A  76      13.796  11.302 -88.204  1.00  0.00           C  
ATOM   1129  OH  TYR A  76      13.111  11.581 -87.044  1.00  0.00           O  
ATOM   1130  H   TYR A  76      15.630  13.577 -92.252  1.00  0.00           H  
ATOM   1131  HA  TYR A  76      17.304  12.073 -91.795  1.00  0.00           H  
ATOM   1132 1HB  TYR A  76      15.230   9.960 -92.512  1.00  0.00           H  
ATOM   1133 2HB  TYR A  76      16.700   9.704 -91.582  1.00  0.00           H  
ATOM   1134  HD1 TYR A  76      13.493   9.493 -91.051  1.00  0.00           H  
ATOM   1135  HD2 TYR A  76      16.696  12.045 -89.773  1.00  0.00           H  
ATOM   1136  HE1 TYR A  76      12.262   9.994 -88.967  1.00  0.00           H  
ATOM   1137  HE2 TYR A  76      15.466  12.546 -87.689  1.00  0.00           H  
ATOM   1138  HH  TYR A  76      12.234  11.194 -87.091  1.00  0.00           H  
ATOM   1139  N   VAL A  77      17.328  12.162 -94.721  1.00  0.00           N  
ATOM   1140  CA  VAL A  77      18.058  11.935 -95.958  1.00  0.00           C  
ATOM   1141  C   VAL A  77      19.037  13.082 -96.133  1.00  0.00           C  
ATOM   1142  O   VAL A  77      18.626  14.220 -96.386  1.00  0.00           O  
ATOM   1143  CB  VAL A  77      17.104  11.861 -97.164  1.00  0.00           C  
ATOM   1144  CG1 VAL A  77      17.888  11.655 -98.452  1.00  0.00           C  
ATOM   1145  CG2 VAL A  77      16.097  10.739 -96.960  1.00  0.00           C  
ATOM   1146  H   VAL A  77      16.843  13.037 -94.590  1.00  0.00           H  
ATOM   1147  HA  VAL A  77      18.585  10.983 -95.879  1.00  0.00           H  
ATOM   1148  HB  VAL A  77      16.577  12.811 -97.258  1.00  0.00           H  
ATOM   1149 1HG1 VAL A  77      17.197  11.605 -99.294  1.00  0.00           H  
ATOM   1150 2HG1 VAL A  77      18.576  12.487 -98.596  1.00  0.00           H  
ATOM   1151 3HG1 VAL A  77      18.450  10.723 -98.389  1.00  0.00           H  
ATOM   1152 1HG2 VAL A  77      15.425  10.693 -97.816  1.00  0.00           H  
ATOM   1153 2HG2 VAL A  77      16.625   9.790 -96.861  1.00  0.00           H  
ATOM   1154 3HG2 VAL A  77      15.519  10.929 -96.055  1.00  0.00           H  
ATOM   1155  N   GLN A  78      20.324  12.790 -96.013  1.00  0.00           N  
ATOM   1156  CA  GLN A  78      21.331  13.826 -96.127  1.00  0.00           C  
ATOM   1157  C   GLN A  78      22.190  13.660 -97.366  1.00  0.00           C  
ATOM   1158  O   GLN A  78      22.782  14.635 -97.831  1.00  0.00           O  
ATOM   1159  CB  GLN A  78      22.220  13.837 -94.880  1.00  0.00           C  
ATOM   1160  CG  GLN A  78      21.474  14.118 -93.587  1.00  0.00           C  
ATOM   1161  CD  GLN A  78      20.827  15.490 -93.579  1.00  0.00           C  
ATOM   1162  OE1 GLN A  78      21.491  16.506 -93.802  1.00  0.00           O  
ATOM   1163  NE2 GLN A  78      19.525  15.528 -93.321  1.00  0.00           N  
ATOM   1164  H   GLN A  78      20.615  11.838 -95.839  1.00  0.00           H  
ATOM   1165  HA  GLN A  78      20.828  14.789 -96.209  1.00  0.00           H  
ATOM   1166 1HB  GLN A  78      22.716  12.872 -94.779  1.00  0.00           H  
ATOM   1167 2HB  GLN A  78      22.996  14.594 -94.993  1.00  0.00           H  
ATOM   1168 1HG  GLN A  78      20.691  13.370 -93.461  1.00  0.00           H  
ATOM   1169 2HG  GLN A  78      22.178  14.067 -92.756  1.00  0.00           H  
ATOM   1170 1HE2 GLN A  78      19.043  16.405 -93.303  1.00  0.00           H  
ATOM   1171 2HE2 GLN A  78      19.025  14.680 -93.146  1.00  0.00           H  
ATOM   1172  N   SER A  79      22.247  12.451 -97.917  1.00  0.00           N  
ATOM   1173  CA  SER A  79      23.078  12.127 -99.063  1.00  0.00           C  
ATOM   1174  C   SER A  79      22.532  10.852 -99.684  1.00  0.00           C  
ATOM   1175  O   SER A  79      22.335   9.855 -98.990  1.00  0.00           O  
ATOM   1176  CB  SER A  79      24.526  11.947 -98.654  1.00  0.00           C  
ATOM   1177  OG  SER A  79      25.308  11.533 -99.741  1.00  0.00           O  
ATOM   1178  H   SER A  79      21.674  11.729 -97.504  1.00  0.00           H  
ATOM   1179  HA  SER A  79      23.022  12.951 -99.776  1.00  0.00           H  
ATOM   1180 1HB  SER A  79      24.913  12.888 -98.262  1.00  0.00           H  
ATOM   1181 2HB  SER A  79      24.590  11.210 -97.855  1.00  0.00           H  
ATOM   1182  HG  SER A  79      25.527  12.330-100.229  1.00  0.00           H  
ATOM   1183  N   VAL A  80      22.246  10.915-100.982  1.00  0.00           N  
ATOM   1184  CA  VAL A  80      21.780   9.780-101.769  1.00  0.00           C  
ATOM   1185  C   VAL A  80      22.680   9.653-102.988  1.00  0.00           C  
ATOM   1186  O   VAL A  80      22.879  10.631-103.713  1.00  0.00           O  
ATOM   1187  CB  VAL A  80      20.316   9.971-102.209  1.00  0.00           C  
ATOM   1188  CG1 VAL A  80      19.857   8.794-103.056  1.00  0.00           C  
ATOM   1189  CG2 VAL A  80      19.425  10.135-100.987  1.00  0.00           C  
ATOM   1190  H   VAL A  80      22.365  11.811-101.434  1.00  0.00           H  
ATOM   1191  HA  VAL A  80      21.837   8.884-101.150  1.00  0.00           H  
ATOM   1192  HB  VAL A  80      20.247  10.862-102.832  1.00  0.00           H  
ATOM   1193 1HG1 VAL A  80      18.820   8.945-103.359  1.00  0.00           H  
ATOM   1194 2HG1 VAL A  80      20.486   8.717-103.943  1.00  0.00           H  
ATOM   1195 3HG1 VAL A  80      19.934   7.875-102.475  1.00  0.00           H  
ATOM   1196 1HG2 VAL A  80      18.392  10.270-101.305  1.00  0.00           H  
ATOM   1197 2HG2 VAL A  80      19.499   9.246-100.360  1.00  0.00           H  
ATOM   1198 3HG2 VAL A  80      19.746  11.008-100.417  1.00  0.00           H  
ATOM   1199  N   THR A  81      23.186   8.452-103.255  1.00  0.00           N  
ATOM   1200  CA  THR A  81      24.010   8.263-104.439  1.00  0.00           C  
ATOM   1201  C   THR A  81      23.881   6.847-104.973  1.00  0.00           C  
ATOM   1202  O   THR A  81      23.656   5.909-104.212  1.00  0.00           O  
ATOM   1203  CB  THR A  81      25.488   8.573-104.142  1.00  0.00           C  
ATOM   1204  OG1 THR A  81      26.233   8.582-105.367  1.00  0.00           O  
ATOM   1205  CG2 THR A  81      26.074   7.529-103.205  1.00  0.00           C  
ATOM   1206  H   THR A  81      23.008   7.663-102.650  1.00  0.00           H  
ATOM   1207  HA  THR A  81      23.665   8.949-105.213  1.00  0.00           H  
ATOM   1208  HB  THR A  81      25.568   9.556-103.677  1.00  0.00           H  
ATOM   1209  HG1 THR A  81      26.408   7.678-105.641  1.00  0.00           H  
ATOM   1210 1HG2 THR A  81      27.120   7.764-103.006  1.00  0.00           H  
ATOM   1211 2HG2 THR A  81      25.517   7.527-102.268  1.00  0.00           H  
ATOM   1212 3HG2 THR A  81      26.006   6.545-103.668  1.00  0.00           H  
ATOM   1213  N   VAL A  82      24.059   6.700-106.286  1.00  0.00           N  
ATOM   1214  CA  VAL A  82      23.988   5.408-106.966  1.00  0.00           C  
ATOM   1215  C   VAL A  82      25.400   4.880-107.161  1.00  0.00           C  
ATOM   1216  O   VAL A  82      26.260   5.577-107.710  1.00  0.00           O  
ATOM   1217  CB  VAL A  82      23.285   5.539-108.330  1.00  0.00           C  
ATOM   1218  CG1 VAL A  82      23.320   4.213-109.076  1.00  0.00           C  
ATOM   1219  CG2 VAL A  82      21.852   6.009-108.131  1.00  0.00           C  
ATOM   1220  H   VAL A  82      24.251   7.530-106.827  1.00  0.00           H  
ATOM   1221  HA  VAL A  82      23.410   4.722-106.346  1.00  0.00           H  
ATOM   1222  HB  VAL A  82      23.825   6.264-108.939  1.00  0.00           H  
ATOM   1223 1HG1 VAL A  82      22.819   4.324-110.038  1.00  0.00           H  
ATOM   1224 2HG1 VAL A  82      24.355   3.914-109.239  1.00  0.00           H  
ATOM   1225 3HG1 VAL A  82      22.809   3.451-108.487  1.00  0.00           H  
ATOM   1226 1HG2 VAL A  82      21.362   6.100-109.100  1.00  0.00           H  
ATOM   1227 2HG2 VAL A  82      21.314   5.286-107.518  1.00  0.00           H  
ATOM   1228 3HG2 VAL A  82      21.853   6.978-107.633  1.00  0.00           H  
ATOM   1229  N   ALA A  83      25.630   3.639-106.747  1.00  0.00           N  
ATOM   1230  CA  ALA A  83      26.922   2.988-106.923  1.00  0.00           C  
ATOM   1231  C   ALA A  83      26.718   1.686-107.682  1.00  0.00           C  
ATOM   1232  O   ALA A  83      26.378   0.668-107.084  1.00  0.00           O  
ATOM   1233  CB  ALA A  83      27.578   2.731-105.572  1.00  0.00           C  
ATOM   1234  H   ALA A  83      24.881   3.134-106.296  1.00  0.00           H  
ATOM   1235  HA  ALA A  83      27.559   3.650-107.510  1.00  0.00           H  
ATOM   1236 1HB  ALA A  83      28.541   2.244-105.721  1.00  0.00           H  
ATOM   1237 2HB  ALA A  83      27.727   3.679-105.054  1.00  0.00           H  
ATOM   1238 3HB  ALA A  83      26.936   2.088-104.972  1.00  0.00           H  
ATOM   1239  N   ASN A  84      26.955   1.709-108.996  1.00  0.00           N  
ATOM   1240  CA  ASN A  84      26.754   0.522-109.819  1.00  0.00           C  
ATOM   1241  C   ASN A  84      25.338  -0.005-109.636  1.00  0.00           C  
ATOM   1242  O   ASN A  84      25.105  -1.208-109.498  1.00  0.00           O  
ATOM   1243  CB  ASN A  84      27.776  -0.550-109.487  1.00  0.00           C  
ATOM   1244  CG  ASN A  84      29.178  -0.140-109.842  1.00  0.00           C  
ATOM   1245  OD1 ASN A  84      29.394   0.623-110.790  1.00  0.00           O  
ATOM   1246  ND2 ASN A  84      30.136  -0.633-109.099  1.00  0.00           N  
ATOM   1247  H   ASN A  84      27.280   2.560-109.432  1.00  0.00           H  
ATOM   1248  HA  ASN A  84      26.876   0.802-110.866  1.00  0.00           H  
ATOM   1249 1HB  ASN A  84      27.734  -0.774-108.420  1.00  0.00           H  
ATOM   1250 2HB  ASN A  84      27.531  -1.466-110.024  1.00  0.00           H  
ATOM   1251 1HD2 ASN A  84      31.089  -0.395-109.289  1.00  0.00           H  
ATOM   1252 2HD2 ASN A  84      29.916  -1.247-108.342  1.00  0.00           H  
ATOM   1253  N   GLY A  85      24.384   0.924-109.617  1.00  0.00           N  
ATOM   1254  CA  GLY A  85      23.001   0.554-109.506  1.00  0.00           C  
ATOM   1255  C   GLY A  85      22.466   0.484-108.097  1.00  0.00           C  
ATOM   1256  O   GLY A  85      21.249   0.336-107.924  1.00  0.00           O  
ATOM   1257  H   GLY A  85      24.628   1.902-109.682  1.00  0.00           H  
ATOM   1258 1HA  GLY A  85      22.388   1.269-110.056  1.00  0.00           H  
ATOM   1259 2HA  GLY A  85      22.847  -0.421-109.966  1.00  0.00           H  
ATOM   1260  N   VAL A  86      23.322   0.555-107.085  1.00  0.00           N  
ATOM   1261  CA  VAL A  86      22.863   0.461-105.706  1.00  0.00           C  
ATOM   1262  C   VAL A  86      22.640   1.854-105.168  1.00  0.00           C  
ATOM   1263  O   VAL A  86      23.528   2.714-105.249  1.00  0.00           O  
ATOM   1264  CB  VAL A  86      23.892  -0.277-104.829  1.00  0.00           C  
ATOM   1265  CG1 VAL A  86      23.435  -0.301-103.378  1.00  0.00           C  
ATOM   1266  CG2 VAL A  86      24.099  -1.690-105.352  1.00  0.00           C  
ATOM   1267  H   VAL A  86      24.308   0.675-107.269  1.00  0.00           H  
ATOM   1268  HA  VAL A  86      21.930  -0.103-105.690  1.00  0.00           H  
ATOM   1269  HB  VAL A  86      24.837   0.264-104.859  1.00  0.00           H  
ATOM   1270 1HG1 VAL A  86      24.173  -0.827-102.772  1.00  0.00           H  
ATOM   1271 2HG1 VAL A  86      23.328   0.720-103.014  1.00  0.00           H  
ATOM   1272 3HG1 VAL A  86      22.476  -0.815-103.307  1.00  0.00           H  
ATOM   1273 1HG2 VAL A  86      24.828  -2.206-104.728  1.00  0.00           H  
ATOM   1274 2HG2 VAL A  86      23.152  -2.230-105.327  1.00  0.00           H  
ATOM   1275 3HG2 VAL A  86      24.466  -1.648-106.378  1.00  0.00           H  
ATOM   1276  N   ILE A  87      21.479   2.089-104.581  1.00  0.00           N  
ATOM   1277  CA  ILE A  87      21.112   3.396-104.072  1.00  0.00           C  
ATOM   1278  C   ILE A  87      21.405   3.441-102.582  1.00  0.00           C  
ATOM   1279  O   ILE A  87      20.800   2.701-101.801  1.00  0.00           O  
ATOM   1280  CB  ILE A  87      19.626   3.706-104.331  1.00  0.00           C  
ATOM   1281  CG1 ILE A  87      19.331   3.691-105.833  1.00  0.00           C  
ATOM   1282  CG2 ILE A  87      19.249   5.048-103.724  1.00  0.00           C  
ATOM   1283  CD1 ILE A  87      17.857   3.701-106.166  1.00  0.00           C  
ATOM   1284  H   ILE A  87      20.827   1.324-104.487  1.00  0.00           H  
ATOM   1285  HA  ILE A  87      21.709   4.148-104.587  1.00  0.00           H  
ATOM   1286  HB  ILE A  87      19.009   2.928-103.881  1.00  0.00           H  
ATOM   1287 1HG1 ILE A  87      19.793   4.559-106.303  1.00  0.00           H  
ATOM   1288 2HG1 ILE A  87      19.775   2.802-106.282  1.00  0.00           H  
ATOM   1289 1HG2 ILE A  87      18.196   5.252-103.917  1.00  0.00           H  
ATOM   1290 2HG2 ILE A  87      19.423   5.023-102.649  1.00  0.00           H  
ATOM   1291 3HG2 ILE A  87      19.858   5.834-104.172  1.00  0.00           H  
ATOM   1292 1HD1 ILE A  87      17.728   3.689-107.249  1.00  0.00           H  
ATOM   1293 2HD1 ILE A  87      17.380   2.821-105.734  1.00  0.00           H  
ATOM   1294 3HD1 ILE A  87      17.398   4.600-105.757  1.00  0.00           H  
ATOM   1295  N   THR A  88      22.340   4.304-102.182  1.00  0.00           N  
ATOM   1296  CA  THR A  88      22.710   4.386-100.778  1.00  0.00           C  
ATOM   1297  C   THR A  88      22.311   5.741-100.219  1.00  0.00           C  
ATOM   1298  O   THR A  88      22.609   6.781-100.809  1.00  0.00           O  
ATOM   1299  CB  THR A  88      24.219   4.157-100.578  1.00  0.00           C  
ATOM   1300  OG1 THR A  88      24.577   2.857-101.066  1.00  0.00           O  
ATOM   1301  CG2 THR A  88      24.583   4.259 -99.105  1.00  0.00           C  
ATOM   1302  H   THR A  88      22.801   4.909-102.848  1.00  0.00           H  
ATOM   1303  HA  THR A  88      22.173   3.608-100.234  1.00  0.00           H  
ATOM   1304  HB  THR A  88      24.778   4.907-101.137  1.00  0.00           H  
ATOM   1305  HG1 THR A  88      24.285   2.190-100.440  1.00  0.00           H  
ATOM   1306 1HG2 THR A  88      25.654   4.095 -98.982  1.00  0.00           H  
ATOM   1307 2HG2 THR A  88      24.323   5.250 -98.733  1.00  0.00           H  
ATOM   1308 3HG2 THR A  88      24.034   3.505 -98.541  1.00  0.00           H  
ATOM   1309  N   ALA A  89      21.652   5.719 -99.063  1.00  0.00           N  
ATOM   1310  CA  ALA A  89      21.149   6.930 -98.424  1.00  0.00           C  
ATOM   1311  C   ALA A  89      21.825   7.091 -97.070  1.00  0.00           C  
ATOM   1312  O   ALA A  89      22.067   6.106 -96.373  1.00  0.00           O  
ATOM   1313  CB  ALA A  89      19.635   6.879 -98.243  1.00  0.00           C  
ATOM   1314  H   ALA A  89      21.498   4.827 -98.616  1.00  0.00           H  
ATOM   1315  HA  ALA A  89      21.407   7.779 -99.058  1.00  0.00           H  
ATOM   1316 1HB  ALA A  89      19.295   7.797 -97.764  1.00  0.00           H  
ATOM   1317 2HB  ALA A  89      19.155   6.778 -99.216  1.00  0.00           H  
ATOM   1318 3HB  ALA A  89      19.373   6.026 -97.619  1.00  0.00           H  
ATOM   1319  N   GLN A  90      22.100   8.337 -96.684  1.00  0.00           N  
ATOM   1320  CA  GLN A  90      22.694   8.599 -95.383  1.00  0.00           C  
ATOM   1321  C   GLN A  90      21.717   9.239 -94.416  1.00  0.00           C  
ATOM   1322  O   GLN A  90      20.901  10.083 -94.794  1.00  0.00           O  
ATOM   1323  CB  GLN A  90      23.926   9.496 -95.536  1.00  0.00           C  
ATOM   1324  CG  GLN A  90      24.688   9.733 -94.244  1.00  0.00           C  
ATOM   1325  CD  GLN A  90      25.964  10.523 -94.461  1.00  0.00           C  
ATOM   1326  OE1 GLN A  90      26.092  11.266 -95.438  1.00  0.00           O  
ATOM   1327  NE2 GLN A  90      26.918  10.367 -93.550  1.00  0.00           N  
ATOM   1328  H   GLN A  90      21.896   9.114 -97.297  1.00  0.00           H  
ATOM   1329  HA  GLN A  90      23.003   7.650 -94.946  1.00  0.00           H  
ATOM   1330 1HB  GLN A  90      24.613   9.050 -96.255  1.00  0.00           H  
ATOM   1331 2HB  GLN A  90      23.623  10.465 -95.931  1.00  0.00           H  
ATOM   1332 1HG  GLN A  90      24.052  10.292 -93.557  1.00  0.00           H  
ATOM   1333 2HG  GLN A  90      24.952   8.769 -93.808  1.00  0.00           H  
ATOM   1334 1HE2 GLN A  90      27.783  10.863 -93.640  1.00  0.00           H  
ATOM   1335 2HE2 GLN A  90      26.773   9.754 -92.773  1.00  0.00           H  
ATOM   1336  N   MET A  91      21.836   8.851 -93.151  1.00  0.00           N  
ATOM   1337  CA  MET A  91      20.905   9.318 -92.147  1.00  0.00           C  
ATOM   1338  C   MET A  91      21.266  10.713 -91.686  1.00  0.00           C  
ATOM   1339  O   MET A  91      22.344  11.230 -91.962  1.00  0.00           O  
ATOM   1340  CB  MET A  91      20.875   8.353 -90.964  1.00  0.00           C  
ATOM   1341  CG  MET A  91      20.167   7.034 -91.244  1.00  0.00           C  
ATOM   1342  SD  MET A  91      18.413   7.251 -91.607  1.00  0.00           S  
ATOM   1343  CE  MET A  91      17.804   7.805 -90.017  1.00  0.00           C  
ATOM   1344  H   MET A  91      22.580   8.224 -92.879  1.00  0.00           H  
ATOM   1345  HA  MET A  91      19.910   9.359 -92.590  1.00  0.00           H  
ATOM   1346 1HB  MET A  91      21.894   8.125 -90.654  1.00  0.00           H  
ATOM   1347 2HB  MET A  91      20.375   8.828 -90.119  1.00  0.00           H  
ATOM   1348 1HG  MET A  91      20.637   6.543 -92.094  1.00  0.00           H  
ATOM   1349 2HG  MET A  91      20.261   6.380 -90.377  1.00  0.00           H  
ATOM   1350 1HE  MET A  91      16.730   7.982 -90.080  1.00  0.00           H  
ATOM   1351 2HE  MET A  91      18.004   7.041 -89.264  1.00  0.00           H  
ATOM   1352 3HE  MET A  91      18.308   8.730 -89.736  1.00  0.00           H  
ATOM   1353  N   ALA A  92      20.341  11.318 -90.955  1.00  0.00           N  
ATOM   1354  CA  ALA A  92      20.580  12.646 -90.433  1.00  0.00           C  
ATOM   1355  C   ALA A  92      21.596  12.591 -89.304  1.00  0.00           C  
ATOM   1356  O   ALA A  92      21.821  11.550 -88.679  1.00  0.00           O  
ATOM   1357  CB  ALA A  92      19.281  13.274 -89.933  1.00  0.00           C  
ATOM   1358  H   ALA A  92      19.462  10.862 -90.755  1.00  0.00           H  
ATOM   1359  HA  ALA A  92      20.991  13.257 -91.237  1.00  0.00           H  
ATOM   1360 1HB  ALA A  92      19.485  14.272 -89.545  1.00  0.00           H  
ATOM   1361 2HB  ALA A  92      18.569  13.343 -90.755  1.00  0.00           H  
ATOM   1362 3HB  ALA A  92      18.860  12.656 -89.140  1.00  0.00           H  
ATOM   1363  N   SER A  93      22.202  13.737 -89.035  1.00  0.00           N  
ATOM   1364  CA  SER A  93      23.192  13.837 -87.982  1.00  0.00           C  
ATOM   1365  C   SER A  93      22.607  14.277 -86.651  1.00  0.00           C  
ATOM   1366  O   SER A  93      23.358  14.406 -85.678  1.00  0.00           O  
ATOM   1367  CB  SER A  93      24.279  14.807 -88.401  1.00  0.00           C  
ATOM   1368  OG  SER A  93      23.772  16.107 -88.523  1.00  0.00           O  
ATOM   1369  H   SER A  93      21.972  14.560 -89.573  1.00  0.00           H  
ATOM   1370  HA  SER A  93      23.632  12.851 -87.827  1.00  0.00           H  
ATOM   1371 1HB  SER A  93      25.081  14.794 -87.663  1.00  0.00           H  
ATOM   1372 2HB  SER A  93      24.704  14.489 -89.352  1.00  0.00           H  
ATOM   1373  HG  SER A  93      23.133  16.210 -87.814  1.00  0.00           H  
ATOM   1374  N   SER A  94      21.295  14.501 -86.576  1.00  0.00           N  
ATOM   1375  CA  SER A  94      20.670  14.961 -85.343  1.00  0.00           C  
ATOM   1376  C   SER A  94      19.246  14.426 -85.270  1.00  0.00           C  
ATOM   1377  O   SER A  94      18.631  14.108 -86.290  1.00  0.00           O  
ATOM   1378  CB  SER A  94      20.667  16.476 -85.277  1.00  0.00           C  
ATOM   1379  OG  SER A  94      19.841  17.020 -86.270  1.00  0.00           O  
ATOM   1380  H   SER A  94      20.719  14.349 -87.392  1.00  0.00           H  
ATOM   1381  HA  SER A  94      21.245  14.578 -84.500  1.00  0.00           H  
ATOM   1382 1HB  SER A  94      20.320  16.796 -84.296  1.00  0.00           H  
ATOM   1383 2HB  SER A  94      21.683  16.847 -85.402  1.00  0.00           H  
ATOM   1384  HG  SER A  94      19.152  17.501 -85.806  1.00  0.00           H  
ATOM   1385  N   ASN A  95      18.722  14.366 -84.042  1.00  0.00           N  
ATOM   1386  CA  ASN A  95      17.360  13.894 -83.786  1.00  0.00           C  
ATOM   1387  C   ASN A  95      17.212  12.438 -84.187  1.00  0.00           C  
ATOM   1388  O   ASN A  95      16.138  11.978 -84.569  1.00  0.00           O  
ATOM   1389  CB  ASN A  95      16.343  14.752 -84.516  1.00  0.00           C  
ATOM   1390  CG  ASN A  95      16.363  16.185 -84.060  1.00  0.00           C  
ATOM   1391  OD1 ASN A  95      16.531  16.468 -82.869  1.00  0.00           O  
ATOM   1392  ND2 ASN A  95      16.196  17.094 -84.986  1.00  0.00           N  
ATOM   1393  H   ASN A  95      19.295  14.659 -83.264  1.00  0.00           H  
ATOM   1394  HA  ASN A  95      17.164  13.963 -82.715  1.00  0.00           H  
ATOM   1395 1HB  ASN A  95      16.542  14.721 -85.588  1.00  0.00           H  
ATOM   1396 2HB  ASN A  95      15.343  14.347 -84.357  1.00  0.00           H  
ATOM   1397 1HD2 ASN A  95      16.200  18.064 -84.741  1.00  0.00           H  
ATOM   1398 2HD2 ASN A  95      16.063  16.820 -85.938  1.00  0.00           H  
ATOM   1399  N   VAL A  96      18.313  11.710 -84.080  1.00  0.00           N  
ATOM   1400  CA  VAL A  96      18.368  10.305 -84.421  1.00  0.00           C  
ATOM   1401  C   VAL A  96      19.177   9.617 -83.345  1.00  0.00           C  
ATOM   1402  O   VAL A  96      19.886  10.248 -82.562  1.00  0.00           O  
ATOM   1403  CB  VAL A  96      19.015  10.086 -85.801  1.00  0.00           C  
ATOM   1404  CG1 VAL A  96      18.175  10.734 -86.892  1.00  0.00           C  
ATOM   1405  CG2 VAL A  96      20.429  10.646 -85.805  1.00  0.00           C  
ATOM   1406  H   VAL A  96      19.148  12.167 -83.744  1.00  0.00           H  
ATOM   1407  HA  VAL A  96      17.349   9.918 -84.457  1.00  0.00           H  
ATOM   1408  HB  VAL A  96      19.046   9.017 -86.012  1.00  0.00           H  
ATOM   1409 1HG1 VAL A  96      18.647  10.569 -87.861  1.00  0.00           H  
ATOM   1410 2HG1 VAL A  96      17.179  10.293 -86.895  1.00  0.00           H  
ATOM   1411 3HG1 VAL A  96      18.098  11.805 -86.704  1.00  0.00           H  
ATOM   1412 1HG2 VAL A  96      20.881  10.487 -86.783  1.00  0.00           H  
ATOM   1413 2HG2 VAL A  96      20.398  11.714 -85.588  1.00  0.00           H  
ATOM   1414 3HG2 VAL A  96      21.023  10.139 -85.044  1.00  0.00           H  
ATOM   1415  N   ASN A  97      19.064   8.306 -83.321  1.00  0.00           N  
ATOM   1416  CA  ASN A  97      19.855   7.581 -82.357  1.00  0.00           C  
ATOM   1417  C   ASN A  97      21.299   7.618 -82.799  1.00  0.00           C  
ATOM   1418  O   ASN A  97      21.594   7.695 -83.995  1.00  0.00           O  
ATOM   1419  CB  ASN A  97      19.362   6.154 -82.199  1.00  0.00           C  
ATOM   1420  CG  ASN A  97      19.950   5.469 -80.996  1.00  0.00           C  
ATOM   1421  OD1 ASN A  97      21.143   5.144 -80.973  1.00  0.00           O  
ATOM   1422  ND2 ASN A  97      19.136   5.244 -79.996  1.00  0.00           N  
ATOM   1423  H   ASN A  97      18.454   7.795 -83.942  1.00  0.00           H  
ATOM   1424  HA  ASN A  97      19.768   8.080 -81.391  1.00  0.00           H  
ATOM   1425 1HB  ASN A  97      18.275   6.152 -82.108  1.00  0.00           H  
ATOM   1426 2HB  ASN A  97      19.618   5.580 -83.090  1.00  0.00           H  
ATOM   1427 1HD2 ASN A  97      19.472   4.792 -79.170  1.00  0.00           H  
ATOM   1428 2HD2 ASN A  97      18.179   5.524 -80.059  1.00  0.00           H  
ATOM   1429  N   ASN A  98      22.194   7.567 -81.816  1.00  0.00           N  
ATOM   1430  CA  ASN A  98      23.621   7.636 -82.088  1.00  0.00           C  
ATOM   1431  C   ASN A  98      24.086   6.425 -82.884  1.00  0.00           C  
ATOM   1432  O   ASN A  98      25.089   6.480 -83.600  1.00  0.00           O  
ATOM   1433  CB  ASN A  98      24.407   7.760 -80.795  1.00  0.00           C  
ATOM   1434  CG  ASN A  98      24.266   9.116 -80.162  1.00  0.00           C  
ATOM   1435  OD1 ASN A  98      23.981  10.107 -80.844  1.00  0.00           O  
ATOM   1436  ND2 ASN A  98      24.461   9.180 -78.869  1.00  0.00           N  
ATOM   1437  H   ASN A  98      21.879   7.480 -80.860  1.00  0.00           H  
ATOM   1438  HA  ASN A  98      23.815   8.519 -82.699  1.00  0.00           H  
ATOM   1439 1HB  ASN A  98      24.065   7.004 -80.087  1.00  0.00           H  
ATOM   1440 2HB  ASN A  98      25.462   7.571 -80.991  1.00  0.00           H  
ATOM   1441 1HD2 ASN A  98      24.381  10.057 -78.394  1.00  0.00           H  
ATOM   1442 2HD2 ASN A  98      24.690   8.353 -78.357  1.00  0.00           H  
ATOM   1443  N   GLU A  99      23.338   5.327 -82.789  1.00  0.00           N  
ATOM   1444  CA  GLU A  99      23.711   4.085 -83.445  1.00  0.00           C  
ATOM   1445  C   GLU A  99      23.225   4.058 -84.887  1.00  0.00           C  
ATOM   1446  O   GLU A  99      23.476   3.103 -85.633  1.00  0.00           O  
ATOM   1447  CB  GLU A  99      23.141   2.887 -82.682  1.00  0.00           C  
ATOM   1448  CG  GLU A  99      23.680   2.730 -81.267  1.00  0.00           C  
ATOM   1449  CD  GLU A  99      25.150   2.417 -81.232  1.00  0.00           C  
ATOM   1450  OE1 GLU A  99      25.554   1.482 -81.880  1.00  0.00           O  
ATOM   1451  OE2 GLU A  99      25.870   3.114 -80.556  1.00  0.00           O  
ATOM   1452  H   GLU A  99      22.487   5.361 -82.246  1.00  0.00           H  
ATOM   1453  HA  GLU A  99      24.799   4.010 -83.452  1.00  0.00           H  
ATOM   1454 1HB  GLU A  99      22.057   2.978 -82.618  1.00  0.00           H  
ATOM   1455 2HB  GLU A  99      23.361   1.969 -83.227  1.00  0.00           H  
ATOM   1456 1HG  GLU A  99      23.504   3.654 -80.717  1.00  0.00           H  
ATOM   1457 2HG  GLU A  99      23.132   1.933 -80.767  1.00  0.00           H  
ATOM   1458  N   ILE A 100      22.571   5.136 -85.316  1.00  0.00           N  
ATOM   1459  CA  ILE A 100      22.155   5.304 -86.700  1.00  0.00           C  
ATOM   1460  C   ILE A 100      22.576   6.661 -87.220  1.00  0.00           C  
ATOM   1461  O   ILE A 100      22.268   7.019 -88.362  1.00  0.00           O  
ATOM   1462  CB  ILE A 100      20.631   5.147 -86.846  1.00  0.00           C  
ATOM   1463  CG1 ILE A 100      19.904   6.262 -86.091  1.00  0.00           C  
ATOM   1464  CG2 ILE A 100      20.187   3.782 -86.343  1.00  0.00           C  
ATOM   1465  CD1 ILE A 100      18.416   6.311 -86.357  1.00  0.00           C  
ATOM   1466  H   ILE A 100      22.359   5.862 -84.646  1.00  0.00           H  
ATOM   1467  HA  ILE A 100      22.638   4.535 -87.302  1.00  0.00           H  
ATOM   1468  HB  ILE A 100      20.354   5.244 -87.895  1.00  0.00           H  
ATOM   1469 1HG1 ILE A 100      20.055   6.135 -85.019  1.00  0.00           H  
ATOM   1470 2HG1 ILE A 100      20.330   7.227 -86.367  1.00  0.00           H  
ATOM   1471 1HG2 ILE A 100      19.106   3.688 -86.453  1.00  0.00           H  
ATOM   1472 2HG2 ILE A 100      20.680   3.003 -86.922  1.00  0.00           H  
ATOM   1473 3HG2 ILE A 100      20.455   3.677 -85.291  1.00  0.00           H  
ATOM   1474 1HD1 ILE A 100      17.972   7.128 -85.787  1.00  0.00           H  
ATOM   1475 2HD1 ILE A 100      18.242   6.474 -87.421  1.00  0.00           H  
ATOM   1476 3HD1 ILE A 100      17.962   5.369 -86.055  1.00  0.00           H  
ATOM   1477  N   LYS A 101      23.193   7.446 -86.356  1.00  0.00           N  
ATOM   1478  CA  LYS A 101      23.462   8.832 -86.667  1.00  0.00           C  
ATOM   1479  C   LYS A 101      24.473   8.936 -87.796  1.00  0.00           C  
ATOM   1480  O   LYS A 101      25.545   8.330 -87.742  1.00  0.00           O  
ATOM   1481  CB  LYS A 101      23.965   9.573 -85.428  1.00  0.00           C  
ATOM   1482  CG  LYS A 101      24.181  11.067 -85.634  1.00  0.00           C  
ATOM   1483  CD  LYS A 101      24.603  11.747 -84.340  1.00  0.00           C  
ATOM   1484  CE  LYS A 101      23.426  11.912 -83.391  1.00  0.00           C  
ATOM   1485  NZ  LYS A 101      23.809  12.641 -82.151  1.00  0.00           N  
ATOM   1486  H   LYS A 101      23.485   7.077 -85.462  1.00  0.00           H  
ATOM   1487  HA  LYS A 101      22.533   9.298 -86.999  1.00  0.00           H  
ATOM   1488 1HB  LYS A 101      23.252   9.447 -84.614  1.00  0.00           H  
ATOM   1489 2HB  LYS A 101      24.912   9.140 -85.104  1.00  0.00           H  
ATOM   1490 1HG  LYS A 101      24.955  11.223 -86.386  1.00  0.00           H  
ATOM   1491 2HG  LYS A 101      23.257  11.522 -85.989  1.00  0.00           H  
ATOM   1492 1HD  LYS A 101      25.374  11.151 -83.850  1.00  0.00           H  
ATOM   1493 2HD  LYS A 101      25.017  12.730 -84.564  1.00  0.00           H  
ATOM   1494 1HE  LYS A 101      22.631  12.464 -83.890  1.00  0.00           H  
ATOM   1495 2HE  LYS A 101      23.040  10.931 -83.116  1.00  0.00           H  
ATOM   1496 1HZ  LYS A 101      23.002  12.729 -81.549  1.00  0.00           H  
ATOM   1497 2HZ  LYS A 101      24.534  12.128 -81.668  1.00  0.00           H  
ATOM   1498 3HZ  LYS A 101      24.150  13.560 -82.391  1.00  0.00           H  
ATOM   1499  N   SER A 102      24.098   9.675 -88.839  1.00  0.00           N  
ATOM   1500  CA  SER A 102      24.957   9.900 -89.996  1.00  0.00           C  
ATOM   1501  C   SER A 102      25.491   8.591 -90.573  1.00  0.00           C  
ATOM   1502  O   SER A 102      26.600   8.519 -91.102  1.00  0.00           O  
ATOM   1503  CB  SER A 102      26.116  10.798 -89.610  1.00  0.00           C  
ATOM   1504  OG  SER A 102      25.658  12.050 -89.176  1.00  0.00           O  
ATOM   1505  H   SER A 102      23.179  10.092 -88.821  1.00  0.00           H  
ATOM   1506  HA  SER A 102      24.370  10.393 -90.772  1.00  0.00           H  
ATOM   1507 1HB  SER A 102      26.696  10.325 -88.818  1.00  0.00           H  
ATOM   1508 2HB  SER A 102      26.777  10.927 -90.467  1.00  0.00           H  
ATOM   1509  HG  SER A 102      26.260  12.697 -89.552  1.00  0.00           H  
ATOM   1510  N   LYS A 103      24.690   7.540 -90.447  1.00  0.00           N  
ATOM   1511  CA  LYS A 103      25.033   6.250 -91.021  1.00  0.00           C  
ATOM   1512  C   LYS A 103      24.197   5.950 -92.260  1.00  0.00           C  
ATOM   1513  O   LYS A 103      23.160   6.571 -92.497  1.00  0.00           O  
ATOM   1514  CB  LYS A 103      24.852   5.141 -89.982  1.00  0.00           C  
ATOM   1515  CG  LYS A 103      25.846   5.191 -88.830  1.00  0.00           C  
ATOM   1516  CD  LYS A 103      25.593   4.069 -87.833  1.00  0.00           C  
ATOM   1517  CE  LYS A 103      26.662   4.037 -86.751  1.00  0.00           C  
ATOM   1518  NZ  LYS A 103      27.946   3.477 -87.254  1.00  0.00           N  
ATOM   1519  H   LYS A 103      23.822   7.638 -89.940  1.00  0.00           H  
ATOM   1520  HA  LYS A 103      26.079   6.274 -91.327  1.00  0.00           H  
ATOM   1521 1HB  LYS A 103      23.848   5.198 -89.561  1.00  0.00           H  
ATOM   1522 2HB  LYS A 103      24.950   4.169 -90.467  1.00  0.00           H  
ATOM   1523 1HG  LYS A 103      26.860   5.097 -89.219  1.00  0.00           H  
ATOM   1524 2HG  LYS A 103      25.759   6.148 -88.316  1.00  0.00           H  
ATOM   1525 1HD  LYS A 103      24.618   4.211 -87.365  1.00  0.00           H  
ATOM   1526 2HD  LYS A 103      25.589   3.112 -88.356  1.00  0.00           H  
ATOM   1527 1HE  LYS A 103      26.839   5.047 -86.385  1.00  0.00           H  
ATOM   1528 2HE  LYS A 103      26.317   3.427 -85.917  1.00  0.00           H  
ATOM   1529 1HZ  LYS A 103      28.627   3.472 -86.508  1.00  0.00           H  
ATOM   1530 2HZ  LYS A 103      27.797   2.531 -87.580  1.00  0.00           H  
ATOM   1531 3HZ  LYS A 103      28.286   4.045 -88.017  1.00  0.00           H  
ATOM   1532  N   LYS A 104      24.649   4.964 -93.037  1.00  0.00           N  
ATOM   1533  CA  LYS A 104      24.116   4.693 -94.366  1.00  0.00           C  
ATOM   1534  C   LYS A 104      23.414   3.349 -94.435  1.00  0.00           C  
ATOM   1535  O   LYS A 104      23.615   2.454 -93.614  1.00  0.00           O  
ATOM   1536  CB  LYS A 104      25.233   4.749 -95.408  1.00  0.00           C  
ATOM   1537  CG  LYS A 104      25.912   6.107 -95.531  1.00  0.00           C  
ATOM   1538  CD  LYS A 104      27.118   6.041 -96.455  1.00  0.00           C  
ATOM   1539  CE  LYS A 104      27.917   7.336 -96.417  1.00  0.00           C  
ATOM   1540  NZ  LYS A 104      29.289   7.159 -96.967  1.00  0.00           N  
ATOM   1541  H   LYS A 104      25.395   4.385 -92.679  1.00  0.00           H  
ATOM   1542  HA  LYS A 104      23.376   5.458 -94.604  1.00  0.00           H  
ATOM   1543 1HB  LYS A 104      25.999   4.014 -95.161  1.00  0.00           H  
ATOM   1544 2HB  LYS A 104      24.832   4.487 -96.387  1.00  0.00           H  
ATOM   1545 1HG  LYS A 104      25.202   6.835 -95.926  1.00  0.00           H  
ATOM   1546 2HG  LYS A 104      26.237   6.441 -94.546  1.00  0.00           H  
ATOM   1547 1HD  LYS A 104      27.764   5.216 -96.152  1.00  0.00           H  
ATOM   1548 2HD  LYS A 104      26.784   5.861 -97.477  1.00  0.00           H  
ATOM   1549 1HE  LYS A 104      27.401   8.098 -96.999  1.00  0.00           H  
ATOM   1550 2HE  LYS A 104      27.995   7.685 -95.388  1.00  0.00           H  
ATOM   1551 1HZ  LYS A 104      29.785   8.038 -96.924  1.00  0.00           H  
ATOM   1552 2HZ  LYS A 104      29.784   6.466 -96.424  1.00  0.00           H  
ATOM   1553 3HZ  LYS A 104      29.230   6.853 -97.928  1.00  0.00           H  
ATOM   1554  N   LEU A 105      22.618   3.198 -95.488  1.00  0.00           N  
ATOM   1555  CA  LEU A 105      22.038   1.914 -95.828  1.00  0.00           C  
ATOM   1556  C   LEU A 105      21.733   1.917 -97.313  1.00  0.00           C  
ATOM   1557  O   LEU A 105      21.509   2.969 -97.923  1.00  0.00           O  
ATOM   1558  CB  LEU A 105      20.762   1.653 -95.018  1.00  0.00           C  
ATOM   1559  CG  LEU A 105      19.550   2.518 -95.388  1.00  0.00           C  
ATOM   1560  CD1 LEU A 105      18.276   1.842 -94.901  1.00  0.00           C  
ATOM   1561  CD2 LEU A 105      19.705   3.901 -94.773  1.00  0.00           C  
ATOM   1562  H   LEU A 105      22.413   4.000 -96.066  1.00  0.00           H  
ATOM   1563  HA  LEU A 105      22.760   1.134 -95.590  1.00  0.00           H  
ATOM   1564 1HB  LEU A 105      20.476   0.611 -95.146  1.00  0.00           H  
ATOM   1565 2HB  LEU A 105      20.979   1.822 -93.963  1.00  0.00           H  
ATOM   1566  HG  LEU A 105      19.486   2.608 -96.473  1.00  0.00           H  
ATOM   1567 1HD1 LEU A 105      17.414   2.456 -95.165  1.00  0.00           H  
ATOM   1568 2HD1 LEU A 105      18.180   0.863 -95.372  1.00  0.00           H  
ATOM   1569 3HD1 LEU A 105      18.318   1.722 -93.819  1.00  0.00           H  
ATOM   1570 1HD2 LEU A 105      18.844   4.515 -95.038  1.00  0.00           H  
ATOM   1571 2HD2 LEU A 105      19.768   3.811 -93.689  1.00  0.00           H  
ATOM   1572 3HD2 LEU A 105      20.614   4.368 -95.152  1.00  0.00           H  
ATOM   1573  N   SER A 106      21.726   0.727 -97.896  1.00  0.00           N  
ATOM   1574  CA  SER A 106      21.651   0.606 -99.340  1.00  0.00           C  
ATOM   1575  C   SER A 106      20.330   0.005 -99.787  1.00  0.00           C  
ATOM   1576  O   SER A 106      19.650  -0.703 -99.042  1.00  0.00           O  
ATOM   1577  CB  SER A 106      22.799  -0.244 -99.848  1.00  0.00           C  
ATOM   1578  OG  SER A 106      24.024   0.416 -99.684  1.00  0.00           O  
ATOM   1579  H   SER A 106      21.772  -0.111 -97.334  1.00  0.00           H  
ATOM   1580  HA  SER A 106      21.731   1.603 -99.775  1.00  0.00           H  
ATOM   1581 1HB  SER A 106      22.818  -1.191 -99.308  1.00  0.00           H  
ATOM   1582 2HB  SER A 106      22.645  -0.472-100.902  1.00  0.00           H  
ATOM   1583  HG  SER A 106      24.626   0.019-100.318  1.00  0.00           H  
ATOM   1584  N   LEU A 107      19.989   0.296-101.037  1.00  0.00           N  
ATOM   1585  CA  LEU A 107      18.823  -0.266-101.700  1.00  0.00           C  
ATOM   1586  C   LEU A 107      19.314  -0.935-102.971  1.00  0.00           C  
ATOM   1587  O   LEU A 107      19.953  -0.289-103.808  1.00  0.00           O  
ATOM   1588  CB  LEU A 107      17.786   0.818-102.021  1.00  0.00           C  
ATOM   1589  CG  LEU A 107      16.585   0.361-102.859  1.00  0.00           C  
ATOM   1590  CD1 LEU A 107      15.734  -0.603-102.044  1.00  0.00           C  
ATOM   1591  CD2 LEU A 107      15.775   1.575-103.289  1.00  0.00           C  
ATOM   1592  H   LEU A 107      20.578   0.942-101.543  1.00  0.00           H  
ATOM   1593  HA  LEU A 107      18.361  -0.991-101.030  1.00  0.00           H  
ATOM   1594 1HB  LEU A 107      17.403   1.221-101.085  1.00  0.00           H  
ATOM   1595 2HB  LEU A 107      18.282   1.623-102.564  1.00  0.00           H  
ATOM   1596  HG  LEU A 107      16.939  -0.171-103.742  1.00  0.00           H  
ATOM   1597 1HD1 LEU A 107      14.881  -0.928-102.639  1.00  0.00           H  
ATOM   1598 2HD1 LEU A 107      16.333  -1.471-101.766  1.00  0.00           H  
ATOM   1599 3HD1 LEU A 107      15.379  -0.103-101.144  1.00  0.00           H  
ATOM   1600 1HD2 LEU A 107      14.922   1.251-103.885  1.00  0.00           H  
ATOM   1601 2HD2 LEU A 107      15.420   2.107-102.407  1.00  0.00           H  
ATOM   1602 3HD2 LEU A 107      16.403   2.239-103.885  1.00  0.00           H  
ATOM   1603  N   TRP A 108      19.023  -2.217-103.124  1.00  0.00           N  
ATOM   1604  CA  TRP A 108      19.453  -2.929-104.312  1.00  0.00           C  
ATOM   1605  C   TRP A 108      18.545  -4.111-104.565  1.00  0.00           C  
ATOM   1606  O   TRP A 108      17.741  -4.479-103.708  1.00  0.00           O  
ATOM   1607  CB  TRP A 108      20.899  -3.406-104.165  1.00  0.00           C  
ATOM   1608  CG  TRP A 108      21.059  -4.541-103.199  1.00  0.00           C  
ATOM   1609  CD1 TRP A 108      21.173  -5.864-103.507  1.00  0.00           C  
ATOM   1610  CD2 TRP A 108      21.126  -4.458-101.755  1.00  0.00           C  
ATOM   1611  NE1 TRP A 108      21.303  -6.607-102.360  1.00  0.00           N  
ATOM   1612  CE2 TRP A 108      21.279  -5.763-101.278  1.00  0.00           C  
ATOM   1613  CE3 TRP A 108      21.071  -3.397-100.843  1.00  0.00           C  
ATOM   1614  CZ2 TRP A 108      21.375  -6.043 -99.924  1.00  0.00           C  
ATOM   1615  CZ3 TRP A 108      21.169  -3.677 -99.485  1.00  0.00           C  
ATOM   1616  CH2 TRP A 108      21.317  -4.966 -99.039  1.00  0.00           C  
ATOM   1617  H   TRP A 108      18.500  -2.712-102.416  1.00  0.00           H  
ATOM   1618  HA  TRP A 108      19.398  -2.249-105.162  1.00  0.00           H  
ATOM   1619 1HB  TRP A 108      21.277  -3.727-105.136  1.00  0.00           H  
ATOM   1620 2HB  TRP A 108      21.523  -2.579-103.829  1.00  0.00           H  
ATOM   1621  HD1 TRP A 108      21.161  -6.272-104.516  1.00  0.00           H  
ATOM   1622  HE1 TRP A 108      21.401  -7.611-102.317  1.00  0.00           H  
ATOM   1623  HE3 TRP A 108      20.955  -2.371-101.192  1.00  0.00           H  
ATOM   1624  HZ2 TRP A 108      21.493  -7.060 -99.550  1.00  0.00           H  
ATOM   1625  HZ3 TRP A 108      21.123  -2.846 -98.781  1.00  0.00           H  
ATOM   1626  HH2 TRP A 108      21.392  -5.151 -97.967  1.00  0.00           H  
ATOM   1627  N   ALA A 109      18.689  -4.706-105.738  1.00  0.00           N  
ATOM   1628  CA  ALA A 109      17.883  -5.838-106.159  1.00  0.00           C  
ATOM   1629  C   ALA A 109      18.691  -6.716-107.094  1.00  0.00           C  
ATOM   1630  O   ALA A 109      19.560  -6.222-107.822  1.00  0.00           O  
ATOM   1631  CB  ALA A 109      16.603  -5.365-106.843  1.00  0.00           C  
ATOM   1632  H   ALA A 109      19.397  -4.347-106.362  1.00  0.00           H  
ATOM   1633  HA  ALA A 109      17.621  -6.415-105.272  1.00  0.00           H  
ATOM   1634 1HB  ALA A 109      16.014  -6.229-107.151  1.00  0.00           H  
ATOM   1635 2HB  ALA A 109      16.022  -4.758-106.149  1.00  0.00           H  
ATOM   1636 3HB  ALA A 109      16.858  -4.770-107.719  1.00  0.00           H  
ATOM   1637  N   LYS A 110      18.395  -8.012-107.092  1.00  0.00           N  
ATOM   1638  CA  LYS A 110      19.045  -8.950-107.994  1.00  0.00           C  
ATOM   1639  C   LYS A 110      18.068  -9.319-109.099  1.00  0.00           C  
ATOM   1640  O   LYS A 110      16.875  -9.514-108.846  1.00  0.00           O  
ATOM   1641  CB  LYS A 110      19.517 -10.199-107.247  1.00  0.00           C  
ATOM   1642  CG  LYS A 110      20.688  -9.963-106.304  1.00  0.00           C  
ATOM   1643  CD  LYS A 110      21.114 -11.253-105.617  1.00  0.00           C  
ATOM   1644  CE  LYS A 110      21.556 -12.299-106.629  1.00  0.00           C  
ATOM   1645  NZ  LYS A 110      22.308 -13.411-105.987  1.00  0.00           N  
ATOM   1646  H   LYS A 110      17.699  -8.354-106.445  1.00  0.00           H  
ATOM   1647  HA  LYS A 110      19.917  -8.462-108.430  1.00  0.00           H  
ATOM   1648 1HB  LYS A 110      18.692 -10.606-106.662  1.00  0.00           H  
ATOM   1649 2HB  LYS A 110      19.815 -10.962-107.967  1.00  0.00           H  
ATOM   1650 1HG  LYS A 110      21.534  -9.565-106.866  1.00  0.00           H  
ATOM   1651 2HG  LYS A 110      20.403  -9.235-105.545  1.00  0.00           H  
ATOM   1652 1HD  LYS A 110      21.940 -11.047-104.935  1.00  0.00           H  
ATOM   1653 2HD  LYS A 110      20.279 -11.650-105.040  1.00  0.00           H  
ATOM   1654 1HE  LYS A 110      20.682 -12.711-107.132  1.00  0.00           H  
ATOM   1655 2HE  LYS A 110      22.193 -11.833-107.380  1.00  0.00           H  
ATOM   1656 1HZ  LYS A 110      22.583 -14.083-106.690  1.00  0.00           H  
ATOM   1657 2HZ  LYS A 110      23.132 -13.043-105.533  1.00  0.00           H  
ATOM   1658 3HZ  LYS A 110      21.720 -13.864-105.302  1.00  0.00           H  
ATOM   1659  N   ARG A 111      18.581  -9.401-110.321  1.00  0.00           N  
ATOM   1660  CA  ARG A 111      17.765  -9.778-111.466  1.00  0.00           C  
ATOM   1661  C   ARG A 111      17.251 -11.207-111.347  1.00  0.00           C  
ATOM   1662  O   ARG A 111      18.022 -12.155-111.172  1.00  0.00           O  
ATOM   1663  CB  ARG A 111      18.561  -9.637-112.755  1.00  0.00           C  
ATOM   1664  CG  ARG A 111      17.812 -10.036-114.017  1.00  0.00           C  
ATOM   1665  CD  ARG A 111      16.772  -9.039-114.376  1.00  0.00           C  
ATOM   1666  NE  ARG A 111      16.066  -9.405-115.593  1.00  0.00           N  
ATOM   1667  CZ  ARG A 111      16.473  -9.089-116.838  1.00  0.00           C  
ATOM   1668  NH1 ARG A 111      17.580  -8.400-117.013  1.00  0.00           N  
ATOM   1669  NH2 ARG A 111      15.760  -9.469-117.884  1.00  0.00           N  
ATOM   1670  H   ARG A 111      19.561  -9.197-110.461  1.00  0.00           H  
ATOM   1671  HA  ARG A 111      16.905  -9.110-111.513  1.00  0.00           H  
ATOM   1672 1HB  ARG A 111      18.880  -8.603-112.874  1.00  0.00           H  
ATOM   1673 2HB  ARG A 111      19.460 -10.252-112.697  1.00  0.00           H  
ATOM   1674 1HG  ARG A 111      18.514 -10.114-114.847  1.00  0.00           H  
ATOM   1675 2HG  ARG A 111      17.325 -10.999-113.861  1.00  0.00           H  
ATOM   1676 1HD  ARG A 111      16.043  -8.966-113.569  1.00  0.00           H  
ATOM   1677 2HD  ARG A 111      17.238  -8.067-114.532  1.00  0.00           H  
ATOM   1678  HE  ARG A 111      15.210  -9.936-115.499  1.00  0.00           H  
ATOM   1679 1HH1 ARG A 111      18.125  -8.109-116.214  1.00  0.00           H  
ATOM   1680 2HH1 ARG A 111      17.884  -8.163-117.946  1.00  0.00           H  
ATOM   1681 1HH2 ARG A 111      14.909  -9.999-117.749  1.00  0.00           H  
ATOM   1682 2HH2 ARG A 111      16.064  -9.232-118.816  1.00  0.00           H  
ATOM   1683  N   GLN A 112      15.927 -11.355-111.440  1.00  0.00           N  
ATOM   1684  CA  GLN A 112      15.237 -12.641-111.366  1.00  0.00           C  
ATOM   1685  C   GLN A 112      14.706 -13.088-112.720  1.00  0.00           C  
ATOM   1686  O   GLN A 112      14.808 -12.384-113.727  1.00  0.00           O  
ATOM   1687  CB  GLN A 112      14.085 -12.567-110.361  1.00  0.00           C  
ATOM   1688  CG  GLN A 112      14.518 -12.252-108.940  1.00  0.00           C  
ATOM   1689  CD  GLN A 112      15.362 -13.358-108.334  1.00  0.00           C  
ATOM   1690  OE1 GLN A 112      14.954 -14.522-108.300  1.00  0.00           O  
ATOM   1691  NE2 GLN A 112      16.547 -12.999-107.851  1.00  0.00           N  
ATOM   1692  H   GLN A 112      15.386 -10.513-111.569  1.00  0.00           H  
ATOM   1693  HA  GLN A 112      15.947 -13.396-111.030  1.00  0.00           H  
ATOM   1694 1HB  GLN A 112      13.377 -11.799-110.675  1.00  0.00           H  
ATOM   1695 2HB  GLN A 112      13.552 -13.517-110.348  1.00  0.00           H  
ATOM   1696 1HG  GLN A 112      15.108 -11.336-108.945  1.00  0.00           H  
ATOM   1697 2HG  GLN A 112      13.630 -12.122-108.321  1.00  0.00           H  
ATOM   1698 1HE2 GLN A 112      17.148 -13.685-107.440  1.00  0.00           H  
ATOM   1699 2HE2 GLN A 112      16.838 -12.044-107.899  1.00  0.00           H  
ATOM   1700  N   ASN A 113      14.155 -14.310-112.736  1.00  0.00           N  
ATOM   1701  CA  ASN A 113      13.553 -14.808-113.967  1.00  0.00           C  
ATOM   1702  C   ASN A 113      12.199 -14.167-114.151  1.00  0.00           C  
ATOM   1703  O   ASN A 113      11.648 -14.148-115.255  1.00  0.00           O  
ATOM   1704  CB  ASN A 113      13.439 -16.321-113.954  1.00  0.00           C  
ATOM   1705  CG  ASN A 113      14.777 -17.002-114.037  1.00  0.00           C  
ATOM   1706  OD1 ASN A 113      15.456 -16.939-115.069  1.00  0.00           O  
ATOM   1707  ND2 ASN A 113      15.170 -17.651-112.971  1.00  0.00           N  
ATOM   1708  H   ASN A 113      14.146 -14.894-111.913  1.00  0.00           H  
ATOM   1709  HA  ASN A 113      14.190 -14.521-114.805  1.00  0.00           H  
ATOM   1710 1HB  ASN A 113      12.938 -16.641-113.039  1.00  0.00           H  
ATOM   1711 2HB  ASN A 113      12.826 -16.647-114.794  1.00  0.00           H  
ATOM   1712 1HD2 ASN A 113      16.052 -18.123-112.970  1.00  0.00           H  
ATOM   1713 2HD2 ASN A 113      14.589 -17.675-112.158  1.00  0.00           H  
ATOM   1714  N   GLY A 114      11.668 -13.599-113.079  1.00  0.00           N  
ATOM   1715  CA  GLY A 114      10.486 -12.775-113.154  1.00  0.00           C  
ATOM   1716  C   GLY A 114      10.906 -11.330-113.298  1.00  0.00           C  
ATOM   1717  O   GLY A 114      11.315 -10.880-114.365  1.00  0.00           O  
ATOM   1718  H   GLY A 114      12.107 -13.749-112.181  1.00  0.00           H  
ATOM   1719 1HA  GLY A 114       9.877 -13.090-114.001  1.00  0.00           H  
ATOM   1720 2HA  GLY A 114       9.886 -12.918-112.256  1.00  0.00           H  
ATOM   1721  N   SER A 115      10.791 -10.585-112.211  1.00  0.00           N  
ATOM   1722  CA  SER A 115      11.286  -9.224-112.291  1.00  0.00           C  
ATOM   1723  C   SER A 115      12.616  -9.108-111.579  1.00  0.00           C  
ATOM   1724  O   SER A 115      13.646  -9.555-112.083  1.00  0.00           O  
ATOM   1725  CB  SER A 115      10.286  -8.260-111.683  1.00  0.00           C  
ATOM   1726  OG  SER A 115      10.150  -8.479-110.306  1.00  0.00           O  
ATOM   1727  H   SER A 115      10.385 -10.911-111.345  1.00  0.00           H  
ATOM   1728  HA  SER A 115      11.424  -8.967-113.342  1.00  0.00           H  
ATOM   1729 1HB  SER A 115      10.614  -7.236-111.860  1.00  0.00           H  
ATOM   1730 2HB  SER A 115       9.320  -8.383-112.170  1.00  0.00           H  
ATOM   1731  HG  SER A 115       9.490  -7.852-110.001  1.00  0.00           H  
ATOM   1732  N   VAL A 116      12.604  -8.556-110.377  1.00  0.00           N  
ATOM   1733  CA  VAL A 116      13.837  -8.433-109.626  1.00  0.00           C  
ATOM   1734  C   VAL A 116      13.501  -8.772-108.187  1.00  0.00           C  
ATOM   1735  O   VAL A 116      12.343  -8.641-107.778  1.00  0.00           O  
ATOM   1736  CB  VAL A 116      14.419  -7.010-109.723  1.00  0.00           C  
ATOM   1737  CG1 VAL A 116      14.780  -6.680-111.164  1.00  0.00           C  
ATOM   1738  CG2 VAL A 116      13.421  -6.003-109.172  1.00  0.00           C  
ATOM   1739  H   VAL A 116      11.744  -8.216-109.971  1.00  0.00           H  
ATOM   1740  HA  VAL A 116      14.567  -9.128-110.042  1.00  0.00           H  
ATOM   1741  HB  VAL A 116      15.341  -6.965-109.143  1.00  0.00           H  
ATOM   1742 1HG1 VAL A 116      15.190  -5.671-111.214  1.00  0.00           H  
ATOM   1743 2HG1 VAL A 116      15.522  -7.391-111.525  1.00  0.00           H  
ATOM   1744 3HG1 VAL A 116      13.886  -6.739-111.785  1.00  0.00           H  
ATOM   1745 1HG2 VAL A 116      13.840  -5.000-109.244  1.00  0.00           H  
ATOM   1746 2HG2 VAL A 116      12.497  -6.054-109.749  1.00  0.00           H  
ATOM   1747 3HG2 VAL A 116      13.209  -6.235-108.128  1.00  0.00           H  
ATOM   1748  N   LYS A 117      14.481  -9.200-107.398  1.00  0.00           N  
ATOM   1749  CA  LYS A 117      14.187  -9.402-105.988  1.00  0.00           C  
ATOM   1750  C   LYS A 117      14.760  -8.281-105.145  1.00  0.00           C  
ATOM   1751  O   LYS A 117      15.974  -8.058-105.120  1.00  0.00           O  
ATOM   1752  CB  LYS A 117      14.734 -10.749-105.511  1.00  0.00           C  
ATOM   1753  CG  LYS A 117      14.391 -11.092-104.068  1.00  0.00           C  
ATOM   1754  CD  LYS A 117      14.867 -12.491-103.705  1.00  0.00           C  
ATOM   1755  CE  LYS A 117      14.590 -12.809-102.243  1.00  0.00           C  
ATOM   1756  NZ  LYS A 117      15.091 -14.157-101.861  1.00  0.00           N  
ATOM   1757  H   LYS A 117      15.413  -9.389-107.739  1.00  0.00           H  
ATOM   1758  HA  LYS A 117      13.105  -9.401-105.856  1.00  0.00           H  
ATOM   1759 1HB  LYS A 117      14.345 -11.545-106.146  1.00  0.00           H  
ATOM   1760 2HB  LYS A 117      15.820 -10.755-105.608  1.00  0.00           H  
ATOM   1761 1HG  LYS A 117      14.865 -10.372-103.400  1.00  0.00           H  
ATOM   1762 2HG  LYS A 117      13.312 -11.037-103.927  1.00  0.00           H  
ATOM   1763 1HD  LYS A 117      14.355 -13.224-104.330  1.00  0.00           H  
ATOM   1764 2HD  LYS A 117      15.939 -12.570-103.887  1.00  0.00           H  
ATOM   1765 1HE  LYS A 117      15.072 -12.063-101.611  1.00  0.00           H  
ATOM   1766 2HE  LYS A 117      13.516 -12.769-102.059  1.00  0.00           H  
ATOM   1767 1HZ  LYS A 117      14.888 -14.329-100.887  1.00  0.00           H  
ATOM   1768 2HZ  LYS A 117      14.637 -14.859-102.428  1.00  0.00           H  
ATOM   1769 3HZ  LYS A 117      16.089 -14.200-102.009  1.00  0.00           H  
ATOM   1770  N   TRP A 118      13.866  -7.606-104.435  1.00  0.00           N  
ATOM   1771  CA  TRP A 118      14.158  -6.367-103.744  1.00  0.00           C  
ATOM   1772  C   TRP A 118      14.894  -6.640-102.446  1.00  0.00           C  
ATOM   1773  O   TRP A 118      14.506  -7.498-101.654  1.00  0.00           O  
ATOM   1774  CB  TRP A 118      12.868  -5.597-103.456  1.00  0.00           C  
ATOM   1775  CG  TRP A 118      12.168  -5.119-104.692  1.00  0.00           C  
ATOM   1776  CD1 TRP A 118      10.973  -5.561-105.175  1.00  0.00           C  
ATOM   1777  CD2 TRP A 118      12.619  -4.096-105.613  1.00  0.00           C  
ATOM   1778  NE1 TRP A 118      10.651  -4.889-106.328  1.00  0.00           N  
ATOM   1779  CE2 TRP A 118      11.646  -3.988-106.610  1.00  0.00           C  
ATOM   1780  CE3 TRP A 118      13.753  -3.277-105.670  1.00  0.00           C  
ATOM   1781  CZ2 TRP A 118      11.769  -3.092-107.661  1.00  0.00           C  
ATOM   1782  CZ3 TRP A 118      13.876  -2.377-106.722  1.00  0.00           C  
ATOM   1783  CH2 TRP A 118      12.909  -2.287-107.691  1.00  0.00           C  
ATOM   1784  H   TRP A 118      12.933  -7.990-104.384  1.00  0.00           H  
ATOM   1785  HA  TRP A 118      14.793  -5.755-104.384  1.00  0.00           H  
ATOM   1786 1HB  TRP A 118      12.181  -6.234-102.898  1.00  0.00           H  
ATOM   1787 2HB  TRP A 118      13.092  -4.732-102.832  1.00  0.00           H  
ATOM   1788  HD1 TRP A 118      10.362  -6.334-104.713  1.00  0.00           H  
ATOM   1789  HE1 TRP A 118       9.818  -5.034-106.881  1.00  0.00           H  
ATOM   1790  HE3 TRP A 118      14.523  -3.342-104.901  1.00  0.00           H  
ATOM   1791  HZ2 TRP A 118      11.012  -3.006-108.440  1.00  0.00           H  
ATOM   1792  HZ3 TRP A 118      14.762  -1.744-106.759  1.00  0.00           H  
ATOM   1793  HH2 TRP A 118      13.036  -1.571-108.503  1.00  0.00           H  
ATOM   1794  N   PHE A 119      15.974  -5.890-102.227  1.00  0.00           N  
ATOM   1795  CA  PHE A 119      16.705  -5.959-100.967  1.00  0.00           C  
ATOM   1796  C   PHE A 119      16.925  -4.570-100.421  1.00  0.00           C  
ATOM   1797  O   PHE A 119      16.884  -3.585-101.164  1.00  0.00           O  
ATOM   1798  CB  PHE A 119      18.052  -6.661-101.153  1.00  0.00           C  
ATOM   1799  CG  PHE A 119      17.940  -8.042-101.732  1.00  0.00           C  
ATOM   1800  CD1 PHE A 119      18.258  -8.281-103.061  1.00  0.00           C  
ATOM   1801  CD2 PHE A 119      17.517  -9.106-100.949  1.00  0.00           C  
ATOM   1802  CE1 PHE A 119      18.155  -9.552-103.594  1.00  0.00           C  
ATOM   1803  CE2 PHE A 119      17.415 -10.377-101.480  1.00  0.00           C  
ATOM   1804  CZ  PHE A 119      17.734 -10.600-102.804  1.00  0.00           C  
ATOM   1805  H   PHE A 119      16.294  -5.259-102.947  1.00  0.00           H  
ATOM   1806  HA  PHE A 119      16.113  -6.534-100.254  1.00  0.00           H  
ATOM   1807 1HB  PHE A 119      18.683  -6.066-101.812  1.00  0.00           H  
ATOM   1808 2HB  PHE A 119      18.559  -6.734-100.192  1.00  0.00           H  
ATOM   1809  HD1 PHE A 119      18.592  -7.452-103.686  1.00  0.00           H  
ATOM   1810  HD2 PHE A 119      17.264  -8.930 -99.903  1.00  0.00           H  
ATOM   1811  HE1 PHE A 119      18.408  -9.725-104.640  1.00  0.00           H  
ATOM   1812  HE2 PHE A 119      17.081 -11.205-100.854  1.00  0.00           H  
ATOM   1813  HZ  PHE A 119      17.652 -11.602-103.224  1.00  0.00           H  
ATOM   1814  N   CYS A 120      17.165  -4.506 -99.122  1.00  0.00           N  
ATOM   1815  CA  CYS A 120      17.429  -3.247 -98.454  1.00  0.00           C  
ATOM   1816  C   CYS A 120      18.101  -3.562 -97.129  1.00  0.00           C  
ATOM   1817  O   CYS A 120      17.659  -4.452 -96.397  1.00  0.00           O  
ATOM   1818  CB  CYS A 120      16.143  -2.455 -98.219  1.00  0.00           C  
ATOM   1819  SG  CYS A 120      16.403  -0.824 -97.483  1.00  0.00           S  
ATOM   1820  H   CYS A 120      17.163  -5.359 -98.581  1.00  0.00           H  
ATOM   1821  HA  CYS A 120      18.084  -2.650 -99.089  1.00  0.00           H  
ATOM   1822 1HB  CYS A 120      15.622  -2.318 -99.167  1.00  0.00           H  
ATOM   1823 2HB  CYS A 120      15.482  -3.020 -97.562  1.00  0.00           H  
ATOM   1824  N   GLY A 121      19.176  -2.853 -96.828  1.00  0.00           N  
ATOM   1825  CA  GLY A 121      19.865  -3.119 -95.589  1.00  0.00           C  
ATOM   1826  C   GLY A 121      21.170  -2.370 -95.525  1.00  0.00           C  
ATOM   1827  O   GLY A 121      21.308  -1.268 -96.058  1.00  0.00           O  
ATOM   1828  H   GLY A 121      19.527  -2.131 -97.441  1.00  0.00           H  
ATOM   1829 1HA  GLY A 121      19.232  -2.828 -94.750  1.00  0.00           H  
ATOM   1830 2HA  GLY A 121      20.049  -4.188 -95.497  1.00  0.00           H  
ATOM   1831  N   GLN A 122      22.141  -3.025 -94.906  1.00  0.00           N  
ATOM   1832  CA  GLN A 122      23.459  -2.482 -94.630  1.00  0.00           C  
ATOM   1833  C   GLN A 122      24.143  -1.872 -95.839  1.00  0.00           C  
ATOM   1834  O   GLN A 122      23.843  -2.238 -96.984  1.00  0.00           O  
ATOM   1835  CB  GLN A 122      24.354  -3.576 -94.042  1.00  0.00           C  
ATOM   1836  CG  GLN A 122      23.936  -4.046 -92.659  1.00  0.00           C  
ATOM   1837  CD  GLN A 122      24.182  -2.996 -91.592  1.00  0.00           C  
ATOM   1838  OE1 GLN A 122      24.391  -1.818 -91.897  1.00  0.00           O  
ATOM   1839  NE2 GLN A 122      24.159  -3.417 -90.333  1.00  0.00           N  
ATOM   1840  H   GLN A 122      21.927  -3.968 -94.614  1.00  0.00           H  
ATOM   1841  HA  GLN A 122      23.355  -1.677 -93.902  1.00  0.00           H  
ATOM   1842 1HB  GLN A 122      24.355  -4.441 -94.705  1.00  0.00           H  
ATOM   1843 2HB  GLN A 122      25.379  -3.212 -93.978  1.00  0.00           H  
ATOM   1844 1HG  GLN A 122      22.871  -4.277 -92.672  1.00  0.00           H  
ATOM   1845 2HG  GLN A 122      24.508  -4.937 -92.401  1.00  0.00           H  
ATOM   1846 1HE2 GLN A 122      24.316  -2.770 -89.585  1.00  0.00           H  
ATOM   1847 2HE2 GLN A 122      23.986  -4.381 -90.130  1.00  0.00           H  
ATOM   1848  N   PRO A 123      25.033  -0.912 -95.622  1.00  0.00           N  
ATOM   1849  CA  PRO A 123      25.790  -0.325 -96.723  1.00  0.00           C  
ATOM   1850  C   PRO A 123      26.483  -1.415 -97.519  1.00  0.00           C  
ATOM   1851  O   PRO A 123      27.319  -2.153 -97.001  1.00  0.00           O  
ATOM   1852  CB  PRO A 123      26.797   0.587 -96.015  1.00  0.00           C  
ATOM   1853  CG  PRO A 123      26.133   0.933 -94.726  1.00  0.00           C  
ATOM   1854  CD  PRO A 123      25.420  -0.330 -94.321  1.00  0.00           C  
ATOM   1855  HA  PRO A 123      25.110   0.261 -97.358  1.00  0.00           H  
ATOM   1856 1HB  PRO A 123      27.751   0.058 -95.875  1.00  0.00           H  
ATOM   1857 2HB  PRO A 123      27.007   1.470 -96.637  1.00  0.00           H  
ATOM   1858 1HG  PRO A 123      26.882   1.252 -93.986  1.00  0.00           H  
ATOM   1859 2HG  PRO A 123      25.445   1.780 -94.868  1.00  0.00           H  
ATOM   1860 1HD  PRO A 123      26.114  -0.982 -93.770  1.00  0.00           H  
ATOM   1861 2HD  PRO A 123      24.549  -0.077 -93.699  1.00  0.00           H  
ATOM   1862  N   VAL A 124      26.084  -1.543 -98.777  1.00  0.00           N  
ATOM   1863  CA  VAL A 124      26.703  -2.449 -99.729  1.00  0.00           C  
ATOM   1864  C   VAL A 124      26.777  -1.707-101.053  1.00  0.00           C  
ATOM   1865  O   VAL A 124      25.997  -0.780-101.297  1.00  0.00           O  
ATOM   1866  CB  VAL A 124      25.888  -3.747 -99.884  1.00  0.00           C  
ATOM   1867  CG1 VAL A 124      25.825  -4.498 -98.562  1.00  0.00           C  
ATOM   1868  CG2 VAL A 124      24.490  -3.424-100.388  1.00  0.00           C  
ATOM   1869  H   VAL A 124      25.306  -0.973 -99.075  1.00  0.00           H  
ATOM   1870  HA  VAL A 124      27.695  -2.712 -99.362  1.00  0.00           H  
ATOM   1871  HB  VAL A 124      26.392  -4.398-100.600  1.00  0.00           H  
ATOM   1872 1HG1 VAL A 124      25.246  -5.413 -98.690  1.00  0.00           H  
ATOM   1873 2HG1 VAL A 124      26.835  -4.750 -98.239  1.00  0.00           H  
ATOM   1874 3HG1 VAL A 124      25.348  -3.870 -97.810  1.00  0.00           H  
ATOM   1875 1HG2 VAL A 124      23.920  -4.347-100.496  1.00  0.00           H  
ATOM   1876 2HG2 VAL A 124      23.989  -2.769 -99.676  1.00  0.00           H  
ATOM   1877 3HG2 VAL A 124      24.558  -2.925-101.355  1.00  0.00           H  
ATOM   1878  N   THR A 125      27.699  -2.106-101.927  1.00  0.00           N  
ATOM   1879  CA  THR A 125      27.727  -1.583-103.282  1.00  0.00           C  
ATOM   1880  C   THR A 125      27.929  -2.718-104.266  1.00  0.00           C  
ATOM   1881  O   THR A 125      28.562  -3.719-103.944  1.00  0.00           O  
ATOM   1882  CB  THR A 125      28.836  -0.530-103.459  1.00  0.00           C  
ATOM   1883  OG1 THR A 125      30.116  -1.140-103.245  1.00  0.00           O  
ATOM   1884  CG2 THR A 125      28.651   0.611-102.471  1.00  0.00           C  
ATOM   1885  H   THR A 125      28.393  -2.785-101.648  1.00  0.00           H  
ATOM   1886  HA  THR A 125      26.769  -1.104-103.488  1.00  0.00           H  
ATOM   1887  HB  THR A 125      28.803  -0.134-104.474  1.00  0.00           H  
ATOM   1888  HG1 THR A 125      30.379  -1.616-104.037  1.00  0.00           H  
ATOM   1889 1HG2 THR A 125      29.444   1.346-102.611  1.00  0.00           H  
ATOM   1890 2HG2 THR A 125      27.684   1.084-102.639  1.00  0.00           H  
ATOM   1891 3HG2 THR A 125      28.693   0.222-101.455  1.00  0.00           H  
ATOM   1892  N   ARG A 126      27.424  -2.538-105.477  1.00  0.00           N  
ATOM   1893  CA  ARG A 126      27.531  -3.610-106.444  1.00  0.00           C  
ATOM   1894  C   ARG A 126      28.915  -3.649-107.053  1.00  0.00           C  
ATOM   1895  O   ARG A 126      29.553  -2.617-107.276  1.00  0.00           O  
ATOM   1896  CB  ARG A 126      26.461  -3.486-107.518  1.00  0.00           C  
ATOM   1897  CG  ARG A 126      26.567  -4.524-108.572  1.00  0.00           C  
ATOM   1898  CD  ARG A 126      25.359  -4.469-109.446  1.00  0.00           C  
ATOM   1899  NE  ARG A 126      24.233  -5.101-108.774  1.00  0.00           N  
ATOM   1900  CZ  ARG A 126      23.173  -4.454-108.305  1.00  0.00           C  
ATOM   1901  NH1 ARG A 126      23.096  -3.146-108.434  1.00  0.00           N  
ATOM   1902  NH2 ARG A 126      22.191  -5.112-107.709  1.00  0.00           N  
ATOM   1903  H   ARG A 126      26.967  -1.678-105.744  1.00  0.00           H  
ATOM   1904  HA  ARG A 126      27.345  -4.556-105.934  1.00  0.00           H  
ATOM   1905 1HB  ARG A 126      25.476  -3.559-107.059  1.00  0.00           H  
ATOM   1906 2HB  ARG A 126      26.531  -2.506-107.989  1.00  0.00           H  
ATOM   1907 1HG  ARG A 126      27.459  -4.343-109.172  1.00  0.00           H  
ATOM   1908 2HG  ARG A 126      26.636  -5.508-108.108  1.00  0.00           H  
ATOM   1909 1HD  ARG A 126      25.112  -3.429-109.660  1.00  0.00           H  
ATOM   1910 2HD  ARG A 126      25.561  -4.993-110.379  1.00  0.00           H  
ATOM   1911  HE  ARG A 126      24.260  -6.105-108.655  1.00  0.00           H  
ATOM   1912 1HH1 ARG A 126      23.842  -2.638-108.888  1.00  0.00           H  
ATOM   1913 2HH1 ARG A 126      22.291  -2.650-108.079  1.00  0.00           H  
ATOM   1914 1HH2 ARG A 126      22.244  -6.116-107.607  1.00  0.00           H  
ATOM   1915 2HH2 ARG A 126      21.389  -4.610-107.356  1.00  0.00           H  
ATOM   1916  N   THR A 127      29.387  -4.872-107.293  1.00  0.00           N  
ATOM   1917  CA  THR A 127      30.764  -5.088-107.717  1.00  0.00           C  
ATOM   1918  C   THR A 127      30.967  -4.597-109.137  1.00  0.00           C  
ATOM   1919  O   THR A 127      31.826  -3.746-109.396  1.00  0.00           O  
ATOM   1920  CB  THR A 127      31.153  -6.575-107.621  1.00  0.00           C  
ATOM   1921  OG1 THR A 127      30.946  -7.040-106.281  1.00  0.00           O  
ATOM   1922  CG2 THR A 127      32.613  -6.769-108.002  1.00  0.00           C  
ATOM   1923  H   THR A 127      28.776  -5.668-107.178  1.00  0.00           H  
ATOM   1924  HA  THR A 127      31.422  -4.520-107.059  1.00  0.00           H  
ATOM   1925  HB  THR A 127      30.527  -7.159-108.295  1.00  0.00           H  
ATOM   1926  HG1 THR A 127      30.019  -7.260-106.159  1.00  0.00           H  
ATOM   1927 1HG2 THR A 127      32.870  -7.826-107.929  1.00  0.00           H  
ATOM   1928 2HG2 THR A 127      32.771  -6.427-109.024  1.00  0.00           H  
ATOM   1929 3HG2 THR A 127      33.244  -6.195-107.325  1.00  0.00           H  
ATOM   1930  N   THR A 128      30.188  -5.110-110.072  1.00  0.00           N  
ATOM   1931  CA  THR A 128      30.281  -4.673-111.449  1.00  0.00           C  
ATOM   1932  C   THR A 128      28.900  -4.301-111.952  1.00  0.00           C  
ATOM   1933  O   THR A 128      27.881  -4.553-111.304  1.00  0.00           O  
ATOM   1934  CB  THR A 128      30.899  -5.761-112.347  1.00  0.00           C  
ATOM   1935  OG1 THR A 128      29.988  -6.862-112.463  1.00  0.00           O  
ATOM   1936  CG2 THR A 128      32.213  -6.255-111.761  1.00  0.00           C  
ATOM   1937  H   THR A 128      29.514  -5.821-109.826  1.00  0.00           H  
ATOM   1938  HA  THR A 128      30.925  -3.794-111.490  1.00  0.00           H  
ATOM   1939  HB  THR A 128      31.081  -5.352-113.341  1.00  0.00           H  
ATOM   1940  HG1 THR A 128      29.936  -7.139-113.381  1.00  0.00           H  
ATOM   1941 1HG2 THR A 128      32.634  -7.023-112.409  1.00  0.00           H  
ATOM   1942 2HG2 THR A 128      32.911  -5.422-111.682  1.00  0.00           H  
ATOM   1943 3HG2 THR A 128      32.035  -6.673-110.771  1.00  0.00           H  
ATOM   1944  N   ALA A 129      28.879  -3.685-113.129  1.00  0.00           N  
ATOM   1945  CA  ALA A 129      27.611  -3.323-113.746  1.00  0.00           C  
ATOM   1946  C   ALA A 129      26.948  -4.550-114.353  1.00  0.00           C  
ATOM   1947  O   ALA A 129      25.753  -4.530-114.660  1.00  0.00           O  
ATOM   1948  CB  ALA A 129      27.845  -2.241-114.801  1.00  0.00           C  
ATOM   1949  H   ALA A 129      29.740  -3.461-113.608  1.00  0.00           H  
ATOM   1950  HA  ALA A 129      26.957  -2.929-112.969  1.00  0.00           H  
ATOM   1951 1HB  ALA A 129      26.895  -1.971-115.262  1.00  0.00           H  
ATOM   1952 2HB  ALA A 129      28.283  -1.361-114.328  1.00  0.00           H  
ATOM   1953 3HB  ALA A 129      28.524  -2.618-115.564  1.00  0.00           H  
ATOM   1954  N   THR A 130      27.712  -5.631-114.507  1.00  0.00           N  
ATOM   1955  CA  THR A 130      27.167  -6.866-115.050  1.00  0.00           C  
ATOM   1956  C   THR A 130      26.738  -7.816-113.947  1.00  0.00           C  
ATOM   1957  O   THR A 130      25.868  -8.665-114.163  1.00  0.00           O  
ATOM   1958  CB  THR A 130      28.189  -7.568-115.965  1.00  0.00           C  
ATOM   1959  OG1 THR A 130      29.354  -7.914-115.205  1.00  0.00           O  
ATOM   1960  CG2 THR A 130      28.590  -6.656-117.114  1.00  0.00           C  
ATOM   1961  H   THR A 130      28.687  -5.598-114.244  1.00  0.00           H  
ATOM   1962  HA  THR A 130      26.285  -6.624-115.644  1.00  0.00           H  
ATOM   1963  HB  THR A 130      27.750  -8.480-116.368  1.00  0.00           H  
ATOM   1964  HG1 THR A 130      29.484  -8.865-115.237  1.00  0.00           H  
ATOM   1965 1HG2 THR A 130      29.312  -7.168-117.750  1.00  0.00           H  
ATOM   1966 2HG2 THR A 130      27.707  -6.400-117.700  1.00  0.00           H  
ATOM   1967 3HG2 THR A 130      29.038  -5.746-116.717  1.00  0.00           H  
ATOM   1968  N   ALA A 131      27.313  -7.670-112.759  1.00  0.00           N  
ATOM   1969  CA  ALA A 131      26.940  -8.500-111.627  1.00  0.00           C  
ATOM   1970  C   ALA A 131      25.611  -8.062-111.035  1.00  0.00           C  
ATOM   1971  O   ALA A 131      25.101  -6.979-111.315  1.00  0.00           O  
ATOM   1972  CB  ALA A 131      28.015  -8.438-110.539  1.00  0.00           C  
ATOM   1973  H   ALA A 131      28.026  -6.965-112.638  1.00  0.00           H  
ATOM   1974  HA  ALA A 131      26.825  -9.524-111.982  1.00  0.00           H  
ATOM   1975 1HB  ALA A 131      27.719  -9.067-109.699  1.00  0.00           H  
ATOM   1976 2HB  ALA A 131      28.963  -8.796-110.942  1.00  0.00           H  
ATOM   1977 3HB  ALA A 131      28.130  -7.410-110.199  1.00  0.00           H  
ATOM   1978  N   THR A 132      25.038  -8.955-110.237  1.00  0.00           N  
ATOM   1979  CA  THR A 132      23.840  -8.659-109.466  1.00  0.00           C  
ATOM   1980  C   THR A 132      24.170  -8.653-107.978  1.00  0.00           C  
ATOM   1981  O   THR A 132      23.490  -7.989-107.191  1.00  0.00           O  
ATOM   1982  CB  THR A 132      22.721  -9.677-109.753  1.00  0.00           C  
ATOM   1983  OG1 THR A 132      23.177 -10.997-109.429  1.00  0.00           O  
ATOM   1984  CG2 THR A 132      22.319  -9.629-111.220  1.00  0.00           C  
ATOM   1985  H   THR A 132      25.454  -9.873-110.166  1.00  0.00           H  
ATOM   1986  HA  THR A 132      23.481  -7.670-109.750  1.00  0.00           H  
ATOM   1987  HB  THR A 132      21.852  -9.446-109.137  1.00  0.00           H  
ATOM   1988  HG1 THR A 132      23.866 -10.942-108.763  1.00  0.00           H  
ATOM   1989 1HG2 THR A 132      21.527 -10.355-111.404  1.00  0.00           H  
ATOM   1990 2HG2 THR A 132      21.961  -8.630-111.466  1.00  0.00           H  
ATOM   1991 3HG2 THR A 132      23.182  -9.868-111.841  1.00  0.00           H  
ATOM   1992  N   ASP A 133      25.242  -9.349-107.588  1.00  0.00           N  
ATOM   1993  CA  ASP A 133      25.658  -9.415-106.193  1.00  0.00           C  
ATOM   1994  C   ASP A 133      26.375  -8.139-105.769  1.00  0.00           C  
ATOM   1995  O   ASP A 133      26.979  -7.429-106.574  1.00  0.00           O  
ATOM   1996  CB  ASP A 133      26.572 -10.621-105.964  1.00  0.00           C  
ATOM   1997  CG  ASP A 133      25.823 -11.946-105.997  1.00  0.00           C  
ATOM   1998  OD1 ASP A 133      24.631 -11.938-105.801  1.00  0.00           O  
ATOM   1999  OD2 ASP A 133      26.451 -12.955-106.217  1.00  0.00           O  
ATOM   2000  H   ASP A 133      25.778  -9.845-108.285  1.00  0.00           H  
ATOM   2001  HA  ASP A 133      24.769  -9.527-105.572  1.00  0.00           H  
ATOM   2002 1HB  ASP A 133      27.349 -10.640-106.729  1.00  0.00           H  
ATOM   2003 2HB  ASP A 133      27.067 -10.524-104.997  1.00  0.00           H  
ATOM   2004  N   VAL A 134      26.319  -7.866-104.467  1.00  0.00           N  
ATOM   2005  CA  VAL A 134      26.899  -6.651-103.928  1.00  0.00           C  
ATOM   2006  C   VAL A 134      27.953  -7.013-102.895  1.00  0.00           C  
ATOM   2007  O   VAL A 134      27.894  -8.068-102.257  1.00  0.00           O  
ATOM   2008  CB  VAL A 134      25.815  -5.767-103.283  1.00  0.00           C  
ATOM   2009  CG1 VAL A 134      24.809  -5.310-104.329  1.00  0.00           C  
ATOM   2010  CG2 VAL A 134      25.122  -6.531-102.165  1.00  0.00           C  
ATOM   2011  H   VAL A 134      25.865  -8.514-103.840  1.00  0.00           H  
ATOM   2012  HA  VAL A 134      27.358  -6.094-104.746  1.00  0.00           H  
ATOM   2013  HB  VAL A 134      26.284  -4.871-102.875  1.00  0.00           H  
ATOM   2014 1HG1 VAL A 134      24.050  -4.686-103.855  1.00  0.00           H  
ATOM   2015 2HG1 VAL A 134      25.322  -4.734-105.099  1.00  0.00           H  
ATOM   2016 3HG1 VAL A 134      24.333  -6.180-104.780  1.00  0.00           H  
ATOM   2017 1HG2 VAL A 134      24.357  -5.900-101.713  1.00  0.00           H  
ATOM   2018 2HG2 VAL A 134      24.657  -7.429-102.572  1.00  0.00           H  
ATOM   2019 3HG2 VAL A 134      25.854  -6.812-101.408  1.00  0.00           H  
ATOM   2020  N   ALA A 135      28.940  -6.138-102.754  1.00  0.00           N  
ATOM   2021  CA  ALA A 135      30.000  -6.292-101.775  1.00  0.00           C  
ATOM   2022  C   ALA A 135      29.661  -5.523-100.512  1.00  0.00           C  
ATOM   2023  O   ALA A 135      28.981  -4.497-100.562  1.00  0.00           O  
ATOM   2024  CB  ALA A 135      31.330  -5.801-102.341  1.00  0.00           C  
ATOM   2025  H   ALA A 135      28.944  -5.330-103.361  1.00  0.00           H  
ATOM   2026  HA  ALA A 135      30.079  -7.350-101.525  1.00  0.00           H  
ATOM   2027 1HB  ALA A 135      32.112  -5.926-101.592  1.00  0.00           H  
ATOM   2028 2HB  ALA A 135      31.584  -6.380-103.229  1.00  0.00           H  
ATOM   2029 3HB  ALA A 135      31.246  -4.749-102.606  1.00  0.00           H  
ATOM   2030  N   ALA A 136      30.167  -6.014 -99.388  1.00  0.00           N  
ATOM   2031  CA  ALA A 136      29.868  -5.433 -98.088  1.00  0.00           C  
ATOM   2032  C   ALA A 136      30.701  -4.181 -97.878  1.00  0.00           C  
ATOM   2033  O   ALA A 136      31.635  -4.179 -97.075  1.00  0.00           O  
ATOM   2034  CB  ALA A 136      30.137  -6.444 -96.981  1.00  0.00           C  
ATOM   2035  H   ALA A 136      30.779  -6.816 -99.439  1.00  0.00           H  
ATOM   2036  HA  ALA A 136      28.814  -5.157 -98.075  1.00  0.00           H  
ATOM   2037 1HB  ALA A 136      29.909  -5.994 -96.014  1.00  0.00           H  
ATOM   2038 2HB  ALA A 136      29.509  -7.323 -97.130  1.00  0.00           H  
ATOM   2039 3HB  ALA A 136      31.185  -6.739 -97.004  1.00  0.00           H  
ATOM   2040  N   ALA A 137      30.374  -3.112 -98.595  1.00  0.00           N  
ATOM   2041  CA  ALA A 137      31.066  -1.839 -98.441  1.00  0.00           C  
ATOM   2042  C   ALA A 137      30.471  -1.173 -97.212  1.00  0.00           C  
ATOM   2043  O   ALA A 137      29.726  -0.192 -97.334  1.00  0.00           O  
ATOM   2044  CB  ALA A 137      30.911  -0.967 -99.683  1.00  0.00           C  
ATOM   2045  H   ALA A 137      29.623  -3.185 -99.266  1.00  0.00           H  
ATOM   2046  HA  ALA A 137      32.126  -2.046 -98.293  1.00  0.00           H  
ATOM   2047 1HB  ALA A 137      31.439  -0.026 -99.535  1.00  0.00           H  
ATOM   2048 2HB  ALA A 137      31.329  -1.486-100.546  1.00  0.00           H  
ATOM   2049 3HB  ALA A 137      29.855  -0.767 -99.858  1.00  0.00           H  
ATOM   2050  N   ASN A 138      30.814  -1.679 -96.032  1.00  0.00           N  
ATOM   2051  CA  ASN A 138      30.189  -1.221 -94.803  1.00  0.00           C  
ATOM   2052  C   ASN A 138      30.748   0.094 -94.283  1.00  0.00           C  
ATOM   2053  O   ASN A 138      30.339   0.528 -93.197  1.00  0.00           O  
ATOM   2054  CB  ASN A 138      30.307  -2.293 -93.736  1.00  0.00           C  
ATOM   2055  CG  ASN A 138      31.728  -2.521 -93.301  1.00  0.00           C  
ATOM   2056  OD1 ASN A 138      32.542  -1.591 -93.284  1.00  0.00           O  
ATOM   2057  ND2 ASN A 138      32.042  -3.742 -92.948  1.00  0.00           N  
ATOM   2058  H   ASN A 138      31.523  -2.397 -95.985  1.00  0.00           H  
ATOM   2059  HA  ASN A 138      29.133  -1.032 -95.002  1.00  0.00           H  
ATOM   2060 1HB  ASN A 138      29.714  -2.008 -92.866  1.00  0.00           H  
ATOM   2061 2HB  ASN A 138      29.901  -3.231 -94.115  1.00  0.00           H  
ATOM   2062 1HD2 ASN A 138      32.973  -3.952 -92.650  1.00  0.00           H  
ATOM   2063 2HD2 ASN A 138      31.351  -4.464 -92.977  1.00  0.00           H  
ATOM   2064  N   GLY A 139      31.659   0.726 -95.017  1.00  0.00           N  
ATOM   2065  CA  GLY A 139      32.194   2.014 -94.624  1.00  0.00           C  
ATOM   2066  C   GLY A 139      33.097   1.909 -93.420  1.00  0.00           C  
ATOM   2067  O   GLY A 139      33.049   2.741 -92.510  1.00  0.00           O  
ATOM   2068  H   GLY A 139      31.987   0.297 -95.871  1.00  0.00           H  
ATOM   2069 1HA  GLY A 139      32.752   2.446 -95.455  1.00  0.00           H  
ATOM   2070 2HA  GLY A 139      31.374   2.695 -94.400  1.00  0.00           H  
ATOM   2071  N   LYS A 140      33.913   0.859 -93.403  1.00  0.00           N  
ATOM   2072  CA  LYS A 140      34.846   0.608 -92.316  1.00  0.00           C  
ATOM   2073  C   LYS A 140      34.139   0.647 -90.974  1.00  0.00           C  
ATOM   2074  O   LYS A 140      34.652   1.162 -89.980  1.00  0.00           O  
ATOM   2075  CB  LYS A 140      35.988   1.626 -92.339  1.00  0.00           C  
ATOM   2076  CG  LYS A 140      36.822   1.606 -93.613  1.00  0.00           C  
ATOM   2077  CD  LYS A 140      37.974   2.596 -93.534  1.00  0.00           C  
ATOM   2078  CE  LYS A 140      38.788   2.603 -94.820  1.00  0.00           C  
ATOM   2079  NZ  LYS A 140      39.899   3.591 -94.770  1.00  0.00           N  
ATOM   2080  H   LYS A 140      33.877   0.215 -94.180  1.00  0.00           H  
ATOM   2081  HA  LYS A 140      35.268  -0.390 -92.445  1.00  0.00           H  
ATOM   2082 1HB  LYS A 140      35.582   2.630 -92.221  1.00  0.00           H  
ATOM   2083 2HB  LYS A 140      36.657   1.441 -91.498  1.00  0.00           H  
ATOM   2084 1HG  LYS A 140      37.224   0.604 -93.770  1.00  0.00           H  
ATOM   2085 2HG  LYS A 140      36.192   1.862 -94.465  1.00  0.00           H  
ATOM   2086 1HD  LYS A 140      37.582   3.598 -93.357  1.00  0.00           H  
ATOM   2087 2HD  LYS A 140      38.628   2.328 -92.704  1.00  0.00           H  
ATOM   2088 1HE  LYS A 140      39.207   1.612 -94.991  1.00  0.00           H  
ATOM   2089 2HE  LYS A 140      38.139   2.848 -95.660  1.00  0.00           H  
ATOM   2090 1HZ  LYS A 140      40.413   3.565 -95.639  1.00  0.00           H  
ATOM   2091 2HZ  LYS A 140      39.521   4.518 -94.630  1.00  0.00           H  
ATOM   2092 3HZ  LYS A 140      40.519   3.363 -94.006  1.00  0.00           H  
ATOM   2093  N   THR A 141      32.926   0.106 -90.961  1.00  0.00           N  
ATOM   2094  CA  THR A 141      32.068   0.019 -89.790  1.00  0.00           C  
ATOM   2095  C   THR A 141      31.492   1.359 -89.365  1.00  0.00           C  
ATOM   2096  O   THR A 141      30.607   1.396 -88.507  1.00  0.00           O  
ATOM   2097  CB  THR A 141      32.834  -0.598 -88.605  1.00  0.00           C  
ATOM   2098  OG1 THR A 141      33.725   0.378 -88.048  1.00  0.00           O  
ATOM   2099  CG2 THR A 141      33.635  -1.808 -89.060  1.00  0.00           C  
ATOM   2100  H   THR A 141      32.596  -0.265 -91.840  1.00  0.00           H  
ATOM   2101  HA  THR A 141      31.220  -0.623 -90.029  1.00  0.00           H  
ATOM   2102  HB  THR A 141      32.127  -0.905 -87.835  1.00  0.00           H  
ATOM   2103  HG1 THR A 141      33.688   1.181 -88.574  1.00  0.00           H  
ATOM   2104 1HG2 THR A 141      34.170  -2.231 -88.210  1.00  0.00           H  
ATOM   2105 2HG2 THR A 141      32.960  -2.557 -89.474  1.00  0.00           H  
ATOM   2106 3HG2 THR A 141      34.351  -1.505 -89.823  1.00  0.00           H  
ATOM   2107  N   ASP A 142      31.975   2.476 -89.915  1.00  0.00           N  
ATOM   2108  CA  ASP A 142      31.436   3.760 -89.468  1.00  0.00           C  
ATOM   2109  C   ASP A 142      30.079   3.983 -90.115  1.00  0.00           C  
ATOM   2110  O   ASP A 142      29.150   4.473 -89.472  1.00  0.00           O  
ATOM   2111  CB  ASP A 142      32.382   4.910 -89.819  1.00  0.00           C  
ATOM   2112  CG  ASP A 142      33.669   4.889 -89.004  1.00  0.00           C  
ATOM   2113  OD1 ASP A 142      33.697   4.231 -87.992  1.00  0.00           O  
ATOM   2114  OD2 ASP A 142      34.611   5.531 -89.403  1.00  0.00           O  
ATOM   2115  H   ASP A 142      32.694   2.465 -90.623  1.00  0.00           H  
ATOM   2116  HA  ASP A 142      31.322   3.729 -88.384  1.00  0.00           H  
ATOM   2117 1HB  ASP A 142      32.639   4.860 -90.877  1.00  0.00           H  
ATOM   2118 2HB  ASP A 142      31.877   5.862 -89.649  1.00  0.00           H  
ATOM   2119  N   ASP A 143      29.941   3.580 -91.378  1.00  0.00           N  
ATOM   2120  CA  ASP A 143      28.645   3.682 -92.021  1.00  0.00           C  
ATOM   2121  C   ASP A 143      27.749   2.515 -91.659  1.00  0.00           C  
ATOM   2122  O   ASP A 143      26.533   2.599 -91.851  1.00  0.00           O  
ATOM   2123  CB  ASP A 143      28.807   3.752 -93.542  1.00  0.00           C  
ATOM   2124  CG  ASP A 143      29.500   5.026 -94.006  1.00  0.00           C  
ATOM   2125  OD1 ASP A 143      29.486   5.987 -93.273  1.00  0.00           O  
ATOM   2126  OD2 ASP A 143      30.035   5.026 -95.088  1.00  0.00           O  
ATOM   2127  H   ASP A 143      30.720   3.205 -91.899  1.00  0.00           H  
ATOM   2128  HA  ASP A 143      28.160   4.597 -91.680  1.00  0.00           H  
ATOM   2129 1HB  ASP A 143      29.387   2.895 -93.886  1.00  0.00           H  
ATOM   2130 2HB  ASP A 143      27.827   3.695 -94.016  1.00  0.00           H  
ATOM   2131  N   LYS A 144      28.306   1.444 -91.106  1.00  0.00           N  
ATOM   2132  CA  LYS A 144      27.477   0.289 -90.801  1.00  0.00           C  
ATOM   2133  C   LYS A 144      26.539   0.623 -89.656  1.00  0.00           C  
ATOM   2134  O   LYS A 144      26.932   1.239 -88.662  1.00  0.00           O  
ATOM   2135  CB  LYS A 144      28.338  -0.925 -90.450  1.00  0.00           C  
ATOM   2136  CG  LYS A 144      27.553  -2.214 -90.243  1.00  0.00           C  
ATOM   2137  CD  LYS A 144      28.480  -3.386 -89.960  1.00  0.00           C  
ATOM   2138  CE  LYS A 144      27.697  -4.672 -89.737  1.00  0.00           C  
ATOM   2139  NZ  LYS A 144      28.590  -5.823 -89.437  1.00  0.00           N  
ATOM   2140  H   LYS A 144      29.293   1.411 -90.891  1.00  0.00           H  
ATOM   2141  HA  LYS A 144      26.883   0.047 -91.682  1.00  0.00           H  
ATOM   2142 1HB  LYS A 144      29.063  -1.099 -91.245  1.00  0.00           H  
ATOM   2143 2HB  LYS A 144      28.897  -0.724 -89.535  1.00  0.00           H  
ATOM   2144 1HG  LYS A 144      26.868  -2.092 -89.403  1.00  0.00           H  
ATOM   2145 2HG  LYS A 144      26.969  -2.431 -91.137  1.00  0.00           H  
ATOM   2146 1HD  LYS A 144      29.159  -3.526 -90.803  1.00  0.00           H  
ATOM   2147 2HD  LYS A 144      29.073  -3.175 -89.070  1.00  0.00           H  
ATOM   2148 1HE  LYS A 144      27.007  -4.537 -88.905  1.00  0.00           H  
ATOM   2149 2HE  LYS A 144      27.115  -4.902 -90.629  1.00  0.00           H  
ATOM   2150 1HZ  LYS A 144      28.034  -6.654 -89.296  1.00  0.00           H  
ATOM   2151 2HZ  LYS A 144      29.223  -5.969 -90.212  1.00  0.00           H  
ATOM   2152 3HZ  LYS A 144      29.122  -5.629 -88.601  1.00  0.00           H  
ATOM   2153  N   ILE A 145      25.287   0.259 -89.816  1.00  0.00           N  
ATOM   2154  CA  ILE A 145      24.288   0.581 -88.817  1.00  0.00           C  
ATOM   2155  C   ILE A 145      24.170  -0.571 -87.836  1.00  0.00           C  
ATOM   2156  O   ILE A 145      24.252  -1.746 -88.221  1.00  0.00           O  
ATOM   2157  CB  ILE A 145      22.919   0.865 -89.463  1.00  0.00           C  
ATOM   2158  CG1 ILE A 145      22.987   2.133 -90.320  1.00  0.00           C  
ATOM   2159  CG2 ILE A 145      21.844   0.997 -88.396  1.00  0.00           C  
ATOM   2160  CD1 ILE A 145      21.747   2.375 -91.150  1.00  0.00           C  
ATOM   2161  H   ILE A 145      25.009  -0.251 -90.643  1.00  0.00           H  
ATOM   2162  HA  ILE A 145      24.606   1.477 -88.286  1.00  0.00           H  
ATOM   2163  HB  ILE A 145      22.656   0.047 -90.132  1.00  0.00           H  
ATOM   2164 1HG1 ILE A 145      23.142   2.998 -89.677  1.00  0.00           H  
ATOM   2165 2HG1 ILE A 145      23.841   2.071 -90.994  1.00  0.00           H  
ATOM   2166 1HG2 ILE A 145      20.884   1.199 -88.869  1.00  0.00           H  
ATOM   2167 2HG2 ILE A 145      21.781   0.070 -87.827  1.00  0.00           H  
ATOM   2168 3HG2 ILE A 145      22.097   1.818 -87.724  1.00  0.00           H  
ATOM   2169 1HD1 ILE A 145      21.870   3.290 -91.729  1.00  0.00           H  
ATOM   2170 2HD1 ILE A 145      21.592   1.535 -91.827  1.00  0.00           H  
ATOM   2171 3HD1 ILE A 145      20.884   2.476 -90.493  1.00  0.00           H  
ATOM   2172  N   ASN A 146      24.001  -0.225 -86.563  1.00  0.00           N  
ATOM   2173  CA  ASN A 146      23.781  -1.215 -85.528  1.00  0.00           C  
ATOM   2174  C   ASN A 146      22.589  -2.088 -85.860  1.00  0.00           C  
ATOM   2175  O   ASN A 146      21.490  -1.587 -86.104  1.00  0.00           O  
ATOM   2176  CB  ASN A 146      23.597  -0.547 -84.178  1.00  0.00           C  
ATOM   2177  CG  ASN A 146      23.622  -1.528 -83.039  1.00  0.00           C  
ATOM   2178  OD1 ASN A 146      23.029  -2.610 -83.123  1.00  0.00           O  
ATOM   2179  ND2 ASN A 146      24.298  -1.172 -81.977  1.00  0.00           N  
ATOM   2180  H   ASN A 146      24.027   0.752 -86.311  1.00  0.00           H  
ATOM   2181  HA  ASN A 146      24.656  -1.864 -85.478  1.00  0.00           H  
ATOM   2182 1HB  ASN A 146      24.387   0.189 -84.026  1.00  0.00           H  
ATOM   2183 2HB  ASN A 146      22.646  -0.014 -84.162  1.00  0.00           H  
ATOM   2184 1HD2 ASN A 146      24.349  -1.786 -81.188  1.00  0.00           H  
ATOM   2185 2HD2 ASN A 146      24.762  -0.288 -81.953  1.00  0.00           H  
ATOM   2186  N   THR A 147      22.810  -3.402 -85.842  1.00  0.00           N  
ATOM   2187  CA  THR A 147      21.776  -4.319 -86.305  1.00  0.00           C  
ATOM   2188  C   THR A 147      20.559  -4.267 -85.407  1.00  0.00           C  
ATOM   2189  O   THR A 147      19.453  -4.593 -85.845  1.00  0.00           O  
ATOM   2190  CB  THR A 147      22.302  -5.765 -86.374  1.00  0.00           C  
ATOM   2191  OG1 THR A 147      22.742  -6.179 -85.074  1.00  0.00           O  
ATOM   2192  CG2 THR A 147      23.461  -5.865 -87.353  1.00  0.00           C  
ATOM   2193  H   THR A 147      23.687  -3.776 -85.511  1.00  0.00           H  
ATOM   2194  HA  THR A 147      21.470  -4.019 -87.308  1.00  0.00           H  
ATOM   2195  HB  THR A 147      21.501  -6.429 -86.700  1.00  0.00           H  
ATOM   2196  HG1 THR A 147      21.980  -6.413 -84.538  1.00  0.00           H  
ATOM   2197 1HG2 THR A 147      23.820  -6.893 -87.389  1.00  0.00           H  
ATOM   2198 2HG2 THR A 147      23.127  -5.562 -88.345  1.00  0.00           H  
ATOM   2199 3HG2 THR A 147      24.269  -5.211 -87.028  1.00  0.00           H  
ATOM   2200  N   LYS A 148      20.731  -3.859 -84.150  1.00  0.00           N  
ATOM   2201  CA  LYS A 148      19.570  -3.774 -83.277  1.00  0.00           C  
ATOM   2202  C   LYS A 148      18.677  -2.627 -83.710  1.00  0.00           C  
ATOM   2203  O   LYS A 148      17.488  -2.606 -83.394  1.00  0.00           O  
ATOM   2204  CB  LYS A 148      19.997  -3.595 -81.819  1.00  0.00           C  
ATOM   2205  CG  LYS A 148      20.678  -4.813 -81.210  1.00  0.00           C  
ATOM   2206  CD  LYS A 148      21.081  -4.556 -79.765  1.00  0.00           C  
ATOM   2207  CE  LYS A 148      21.754  -5.775 -79.152  1.00  0.00           C  
ATOM   2208  NZ  LYS A 148      22.182  -5.527 -77.749  1.00  0.00           N  
ATOM   2209  H   LYS A 148      21.639  -3.608 -83.787  1.00  0.00           H  
ATOM   2210  HA  LYS A 148      19.006  -4.703 -83.361  1.00  0.00           H  
ATOM   2211 1HB  LYS A 148      20.686  -2.753 -81.742  1.00  0.00           H  
ATOM   2212 2HB  LYS A 148      19.124  -3.361 -81.211  1.00  0.00           H  
ATOM   2213 1HG  LYS A 148      19.998  -5.665 -81.242  1.00  0.00           H  
ATOM   2214 2HG  LYS A 148      21.568  -5.060 -81.788  1.00  0.00           H  
ATOM   2215 1HD  LYS A 148      21.771  -3.711 -79.725  1.00  0.00           H  
ATOM   2216 2HD  LYS A 148      20.196  -4.308 -79.179  1.00  0.00           H  
ATOM   2217 1HE  LYS A 148      21.062  -6.616 -79.164  1.00  0.00           H  
ATOM   2218 2HE  LYS A 148      22.629  -6.044 -79.743  1.00  0.00           H  
ATOM   2219 1HZ  LYS A 148      22.623  -6.357 -77.379  1.00  0.00           H  
ATOM   2220 2HZ  LYS A 148      22.840  -4.759 -77.727  1.00  0.00           H  
ATOM   2221 3HZ  LYS A 148      21.377  -5.295 -77.186  1.00  0.00           H  
ATOM   2222  N   HIS A 149      19.217  -1.690 -84.485  1.00  0.00           N  
ATOM   2223  CA  HIS A 149      18.431  -0.541 -84.909  1.00  0.00           C  
ATOM   2224  C   HIS A 149      18.004  -0.625 -86.363  1.00  0.00           C  
ATOM   2225  O   HIS A 149      17.652   0.397 -86.955  1.00  0.00           O  
ATOM   2226  CB  HIS A 149      19.221   0.754 -84.689  1.00  0.00           C  
ATOM   2227  CG  HIS A 149      19.576   1.006 -83.257  1.00  0.00           C  
ATOM   2228  ND1 HIS A 149      20.546   0.285 -82.593  1.00  0.00           N  
ATOM   2229  CD2 HIS A 149      19.090   1.898 -82.362  1.00  0.00           C  
ATOM   2230  CE1 HIS A 149      20.642   0.724 -81.350  1.00  0.00           C  
ATOM   2231  NE2 HIS A 149      19.770   1.702 -81.185  1.00  0.00           N  
ATOM   2232  H   HIS A 149      20.178  -1.767 -84.786  1.00  0.00           H  
ATOM   2233  HA  HIS A 149      17.517  -0.487 -84.318  1.00  0.00           H  
ATOM   2234 1HB  HIS A 149      20.144   0.719 -85.269  1.00  0.00           H  
ATOM   2235 2HB  HIS A 149      18.639   1.601 -85.051  1.00  0.00           H  
ATOM   2236  HD2 HIS A 149      18.307   2.634 -82.542  1.00  0.00           H  
ATOM   2237  HE1 HIS A 149      21.325   0.344 -80.590  1.00  0.00           H  
ATOM   2238  HE2 HIS A 149      19.622   2.224 -80.333  1.00  0.00           H  
ATOM   2239  N   LEU A 150      18.067  -1.772 -86.941  1.00  0.00           N  
ATOM   2240  CA  LEU A 150      17.616  -1.909 -88.303  1.00  0.00           C  
ATOM   2241  C   LEU A 150      16.141  -2.255 -88.323  1.00  0.00           C  
ATOM   2242  O   LEU A 150      15.652  -3.000 -87.477  1.00  0.00           O  
ATOM   2243  CB  LEU A 150      18.423  -2.992 -89.030  1.00  0.00           C  
ATOM   2244  CG  LEU A 150      19.905  -2.672 -89.265  1.00  0.00           C  
ATOM   2245  CD1 LEU A 150      20.598  -3.886 -89.869  1.00  0.00           C  
ATOM   2246  CD2 LEU A 150      20.024  -1.463 -90.181  1.00  0.00           C  
ATOM   2247  H   LEU A 150      18.429  -2.583 -86.459  1.00  0.00           H  
ATOM   2248  HA  LEU A 150      17.768  -0.959 -88.815  1.00  0.00           H  
ATOM   2249 1HB  LEU A 150      18.372  -3.912 -88.450  1.00  0.00           H  
ATOM   2250 2HB  LEU A 150      17.965  -3.174 -90.002  1.00  0.00           H  
ATOM   2251  HG  LEU A 150      20.386  -2.453 -88.311  1.00  0.00           H  
ATOM   2252 1HD1 LEU A 150      21.651  -3.658 -90.036  1.00  0.00           H  
ATOM   2253 2HD1 LEU A 150      20.514  -4.730 -89.185  1.00  0.00           H  
ATOM   2254 3HD1 LEU A 150      20.127  -4.139 -90.818  1.00  0.00           H  
ATOM   2255 1HD2 LEU A 150      21.077  -1.234 -90.348  1.00  0.00           H  
ATOM   2256 2HD2 LEU A 150      19.544  -1.681 -91.136  1.00  0.00           H  
ATOM   2257 3HD2 LEU A 150      19.536  -0.605 -89.717  1.00  0.00           H  
ATOM   2258  N   PRO A 151      15.403  -1.707 -89.241  1.00  0.00           N  
ATOM   2259  CA  PRO A 151      13.986  -2.064 -89.320  1.00  0.00           C  
ATOM   2260  C   PRO A 151      13.798  -3.485 -89.825  1.00  0.00           C  
ATOM   2261  O   PRO A 151      14.741  -4.115 -90.314  1.00  0.00           O  
ATOM   2262  CB  PRO A 151      13.425  -1.037 -90.309  1.00  0.00           C  
ATOM   2263  CG  PRO A 151      14.577  -0.720 -91.200  1.00  0.00           C  
ATOM   2264  CD  PRO A 151      15.772  -0.728 -90.283  1.00  0.00           C  
ATOM   2265  HA  PRO A 151      13.527  -1.945 -88.327  1.00  0.00           H  
ATOM   2266 1HB  PRO A 151      12.571  -1.467 -90.853  1.00  0.00           H  
ATOM   2267 2HB  PRO A 151      13.050  -0.157 -89.766  1.00  0.00           H  
ATOM   2268 1HG  PRO A 151      14.655  -1.469 -92.002  1.00  0.00           H  
ATOM   2269 2HG  PRO A 151      14.424   0.254 -91.687  1.00  0.00           H  
ATOM   2270 1HD  PRO A 151      16.662  -1.053 -90.842  1.00  0.00           H  
ATOM   2271 2HD  PRO A 151      15.922   0.280 -89.867  1.00  0.00           H  
ATOM   2272  N   SER A 152      12.576  -3.996 -89.680  1.00  0.00           N  
ATOM   2273  CA  SER A 152      12.302  -5.381 -90.039  1.00  0.00           C  
ATOM   2274  C   SER A 152      12.446  -5.605 -91.535  1.00  0.00           C  
ATOM   2275  O   SER A 152      12.638  -6.739 -91.981  1.00  0.00           O  
ATOM   2276  CB  SER A 152      10.905  -5.767 -89.595  1.00  0.00           C  
ATOM   2277  OG  SER A 152       9.934  -5.076 -90.332  1.00  0.00           O  
ATOM   2278  H   SER A 152      11.827  -3.424 -89.318  1.00  0.00           H  
ATOM   2279  HA  SER A 152      13.024  -6.020 -89.528  1.00  0.00           H  
ATOM   2280 1HB  SER A 152      10.767  -6.841 -89.722  1.00  0.00           H  
ATOM   2281 2HB  SER A 152      10.786  -5.546 -88.535  1.00  0.00           H  
ATOM   2282  HG  SER A 152      10.039  -5.363 -91.242  1.00  0.00           H  
ATOM   2283  N   THR A 153      12.358  -4.540 -92.327  1.00  0.00           N  
ATOM   2284  CA  THR A 153      12.483  -4.701 -93.772  1.00  0.00           C  
ATOM   2285  C   THR A 153      13.901  -4.436 -94.246  1.00  0.00           C  
ATOM   2286  O   THR A 153      14.524  -5.303 -94.874  1.00  0.00           O  
ATOM   2287  CB  THR A 153      11.511  -3.767 -94.517  1.00  0.00           C  
ATOM   2288  OG1 THR A 153      11.821  -2.403 -94.205  1.00  0.00           O  
ATOM   2289  CG2 THR A 153      10.074  -4.062 -94.115  1.00  0.00           C  
ATOM   2290  H   THR A 153      12.205  -3.618 -91.946  1.00  0.00           H  
ATOM   2291  HA  THR A 153      12.235  -5.731 -94.028  1.00  0.00           H  
ATOM   2292  HB  THR A 153      11.619  -3.913 -95.592  1.00  0.00           H  
ATOM   2293  HG1 THR A 153      12.084  -1.944 -95.007  1.00  0.00           H  
ATOM   2294 1HG2 THR A 153       9.402  -3.393 -94.652  1.00  0.00           H  
ATOM   2295 2HG2 THR A 153       9.832  -5.095 -94.361  1.00  0.00           H  
ATOM   2296 3HG2 THR A 153       9.958  -3.908 -93.043  1.00  0.00           H  
ATOM   2297  N   CYS A 154      14.447  -3.263 -93.929  1.00  0.00           N  
ATOM   2298  CA  CYS A 154      15.752  -2.868 -94.448  1.00  0.00           C  
ATOM   2299  C   CYS A 154      16.805  -3.317 -93.442  1.00  0.00           C  
ATOM   2300  O   CYS A 154      17.416  -2.516 -92.736  1.00  0.00           O  
ATOM   2301  CB  CYS A 154      15.839  -1.356 -94.661  1.00  0.00           C  
ATOM   2302  SG  CYS A 154      14.664  -0.713 -95.877  1.00  0.00           S  
ATOM   2303  H   CYS A 154      13.949  -2.632 -93.318  1.00  0.00           H  
ATOM   2304  HA  CYS A 154      15.903  -3.355 -95.412  1.00  0.00           H  
ATOM   2305 1HB  CYS A 154      15.660  -0.845 -93.715  1.00  0.00           H  
ATOM   2306 2HB  CYS A 154      16.843  -1.093 -94.991  1.00  0.00           H  
ATOM   2307  N   ARG A 155      17.017  -4.618 -93.391  1.00  0.00           N  
ATOM   2308  CA  ARG A 155      18.049  -5.231 -92.585  1.00  0.00           C  
ATOM   2309  C   ARG A 155      18.710  -6.382 -93.324  1.00  0.00           C  
ATOM   2310  O   ARG A 155      18.983  -7.420 -92.716  1.00  0.00           O  
ATOM   2311  CB  ARG A 155      17.470  -5.737 -91.271  1.00  0.00           C  
ATOM   2312  CG  ARG A 155      16.378  -6.785 -91.415  1.00  0.00           C  
ATOM   2313  CD  ARG A 155      15.857  -7.220 -90.094  1.00  0.00           C  
ATOM   2314  NE  ARG A 155      14.765  -8.171 -90.228  1.00  0.00           N  
ATOM   2315  CZ  ARG A 155      14.094  -8.715 -89.195  1.00  0.00           C  
ATOM   2316  NH1 ARG A 155      14.414  -8.395 -87.961  1.00  0.00           N  
ATOM   2317  NH2 ARG A 155      13.114  -9.572 -89.422  1.00  0.00           N  
ATOM   2318  H   ARG A 155      16.416  -5.206 -93.952  1.00  0.00           H  
ATOM   2319  HA  ARG A 155      18.808  -4.479 -92.364  1.00  0.00           H  
ATOM   2320 1HB  ARG A 155      18.266  -6.170 -90.667  1.00  0.00           H  
ATOM   2321 2HB  ARG A 155      17.053  -4.900 -90.712  1.00  0.00           H  
ATOM   2322 1HG  ARG A 155      15.550  -6.371 -91.991  1.00  0.00           H  
ATOM   2323 2HG  ARG A 155      16.778  -7.659 -91.931  1.00  0.00           H  
ATOM   2324 1HD  ARG A 155      16.656  -7.697 -89.527  1.00  0.00           H  
ATOM   2325 2HD  ARG A 155      15.490  -6.354 -89.545  1.00  0.00           H  
ATOM   2326  HE  ARG A 155      14.490  -8.442 -91.163  1.00  0.00           H  
ATOM   2327 1HH1 ARG A 155      15.163  -7.739 -87.787  1.00  0.00           H  
ATOM   2328 2HH1 ARG A 155      13.911  -8.803 -87.187  1.00  0.00           H  
ATOM   2329 1HH2 ARG A 155      12.868  -9.819 -90.371  1.00  0.00           H  
ATOM   2330 2HH2 ARG A 155      12.611  -9.980 -88.648  1.00  0.00           H  
ATOM   2331  N   ASP A 156      18.891  -6.246 -94.642  1.00  0.00           N  
ATOM   2332  CA  ASP A 156      19.592  -7.252 -95.427  1.00  0.00           C  
ATOM   2333  C   ASP A 156      21.106  -7.027 -95.409  1.00  0.00           C  
ATOM   2334  O   ASP A 156      21.590  -5.895 -95.333  1.00  0.00           O  
ATOM   2335  CB  ASP A 156      19.085  -7.245 -96.871  1.00  0.00           C  
ATOM   2336  CG  ASP A 156      17.647  -7.731 -96.996  1.00  0.00           C  
ATOM   2337  OD1 ASP A 156      17.290  -8.653 -96.302  1.00  0.00           O  
ATOM   2338  OD2 ASP A 156      16.921  -7.176 -97.785  1.00  0.00           O  
ATOM   2339  H   ASP A 156      18.533  -5.423 -95.104  1.00  0.00           H  
ATOM   2340  HA  ASP A 156      19.394  -8.231 -94.990  1.00  0.00           H  
ATOM   2341 1HB  ASP A 156      19.148  -6.234 -97.274  1.00  0.00           H  
ATOM   2342 2HB  ASP A 156      19.723  -7.882 -97.484  1.00  0.00           H  
ATOM   2343  N   ASP A 157      21.850  -8.127 -95.478  1.00  0.00           N  
ATOM   2344  CA  ASP A 157      23.297  -8.123 -95.603  1.00  0.00           C  
ATOM   2345  C   ASP A 157      23.700  -8.313 -97.057  1.00  0.00           C  
ATOM   2346  O   ASP A 157      22.853  -8.445 -97.939  1.00  0.00           O  
ATOM   2347  CB  ASP A 157      23.919  -9.224 -94.740  1.00  0.00           C  
ATOM   2348  CG  ASP A 157      23.528 -10.624 -95.194  1.00  0.00           C  
ATOM   2349  OD1 ASP A 157      23.185 -10.781 -96.341  1.00  0.00           O  
ATOM   2350  OD2 ASP A 157      23.577 -11.523 -94.389  1.00  0.00           O  
ATOM   2351  H   ASP A 157      21.361  -9.010 -95.441  1.00  0.00           H  
ATOM   2352  HA  ASP A 157      23.672  -7.159 -95.257  1.00  0.00           H  
ATOM   2353 1HB  ASP A 157      25.006  -9.139 -94.768  1.00  0.00           H  
ATOM   2354 2HB  ASP A 157      23.607  -9.094 -93.703  1.00  0.00           H  
ATOM   2355  N   SER A 158      25.009  -8.352 -97.290  1.00  0.00           N  
ATOM   2356  CA  SER A 158      25.565  -8.370 -98.639  1.00  0.00           C  
ATOM   2357  C   SER A 158      25.304  -9.695 -99.329  1.00  0.00           C  
ATOM   2358  O   SER A 158      25.275  -9.774-100.560  1.00  0.00           O  
ATOM   2359  CB  SER A 158      27.057  -8.105 -98.593  1.00  0.00           C  
ATOM   2360  OG  SER A 158      27.738  -9.167 -97.982  1.00  0.00           O  
ATOM   2361  H   SER A 158      25.637  -8.369 -96.499  1.00  0.00           H  
ATOM   2362  HA  SER A 158      25.086  -7.583 -99.222  1.00  0.00           H  
ATOM   2363 1HB  SER A 158      27.433  -7.964 -99.606  1.00  0.00           H  
ATOM   2364 2HB  SER A 158      27.246  -7.184 -98.042  1.00  0.00           H  
ATOM   2365  HG  SER A 158      27.578  -9.936 -98.534  1.00  0.00           H  
ATOM   2366  N   SER A 159      25.084 -10.726 -98.521  1.00  0.00           N  
ATOM   2367  CA  SER A 159      24.843 -12.073 -99.008  1.00  0.00           C  
ATOM   2368  C   SER A 159      23.376 -12.352 -99.301  1.00  0.00           C  
ATOM   2369  O   SER A 159      23.060 -13.460 -99.751  1.00  0.00           O  
ATOM   2370  CB  SER A 159      25.354 -13.077 -97.993  1.00  0.00           C  
ATOM   2371  OG  SER A 159      24.567 -13.064 -96.834  1.00  0.00           O  
ATOM   2372  H   SER A 159      25.087 -10.556 -97.526  1.00  0.00           H  
ATOM   2373  HA  SER A 159      25.385 -12.204 -99.946  1.00  0.00           H  
ATOM   2374 1HB  SER A 159      25.344 -14.074 -98.432  1.00  0.00           H  
ATOM   2375 2HB  SER A 159      26.386 -12.842 -97.738  1.00  0.00           H  
ATOM   2376  HG  SER A 159      23.969 -12.318 -96.928  1.00  0.00           H  
ATOM   2377  N   ALA A 160      22.487 -11.390 -99.078  1.00  0.00           N  
ATOM   2378  CA  ALA A 160      21.076 -11.604 -99.369  1.00  0.00           C  
ATOM   2379  C   ALA A 160      20.890 -11.935-100.842  1.00  0.00           C  
ATOM   2380  O   ALA A 160      21.422 -11.243-101.713  1.00  0.00           O  
ATOM   2381  CB  ALA A 160      20.263 -10.372 -98.990  1.00  0.00           C  
ATOM   2382  H   ALA A 160      22.783 -10.500 -98.704  1.00  0.00           H  
ATOM   2383  HA  ALA A 160      20.733 -12.453 -98.778  1.00  0.00           H  
ATOM   2384 1HB  ALA A 160      19.211 -10.548 -99.214  1.00  0.00           H  
ATOM   2385 2HB  ALA A 160      20.379 -10.173 -97.925  1.00  0.00           H  
ATOM   2386 3HB  ALA A 160      20.616  -9.514 -99.560  1.00  0.00           H  
ATOM   2387  N   SER A 161      20.125 -12.982-101.110  1.00  0.00           N  
ATOM   2388  CA  SER A 161      19.944 -13.480-102.463  1.00  0.00           C  
ATOM   2389  C   SER A 161      18.554 -14.053-102.715  1.00  0.00           C  
ATOM   2390  O   SER A 161      17.974 -14.699-101.848  1.00  0.00           O  
ATOM   2391  OXT SER A 161      18.013 -13.875-103.771  1.00  0.00           O  
ATOM   2392  CB  SER A 161      20.987 -14.541-102.754  1.00  0.00           C  
ATOM   2393  OG  SER A 161      20.841 -15.045-104.053  1.00  0.00           O  
ATOM   2394  H   SER A 161      19.654 -13.448-100.348  1.00  0.00           H  
ATOM   2395  HA  SER A 161      20.075 -12.649-103.158  1.00  0.00           H  
ATOM   2396 1HB  SER A 161      21.983 -14.114-102.636  1.00  0.00           H  
ATOM   2397 2HB  SER A 161      20.892 -15.352-102.033  1.00  0.00           H  
ATOM   2398  HG  SER A 161      20.449 -15.916-103.956  1.00  0.00           H  
TER    2399      SER A 161 
ATOM   2400  N   PHE B   1       5.507   0.233 -31.357  1.00  0.00           N  
ATOM   2401  CA  PHE B   1       5.055   1.272 -32.269  1.00  0.00           C  
ATOM   2402  C   PHE B   1       5.559   0.996 -33.667  1.00  0.00           C  
ATOM   2403  O   PHE B   1       5.905   1.905 -34.415  1.00  0.00           O  
ATOM   2404  CB  PHE B   1       5.537   2.649 -31.808  1.00  0.00           C  
ATOM   2405  CG  PHE B   1       4.860   3.140 -30.560  1.00  0.00           C  
ATOM   2406  CD1 PHE B   1       5.408   2.888 -29.311  1.00  0.00           C  
ATOM   2407  CD2 PHE B   1       3.674   3.855 -30.632  1.00  0.00           C  
ATOM   2408  CE1 PHE B   1       4.786   3.340 -28.163  1.00  0.00           C  
ATOM   2409  CE2 PHE B   1       3.051   4.309 -29.486  1.00  0.00           C  
ATOM   2410  CZ  PHE B   1       3.608   4.051 -28.250  1.00  0.00           C  
ATOM   2411 1H   PHE B   1       5.168   0.426 -30.436  1.00  0.00           H  
ATOM   2412 2H   PHE B   1       5.158  -0.653 -31.661  1.00  0.00           H  
ATOM   2413 3H   PHE B   1       6.507   0.211 -31.345  1.00  0.00           H  
ATOM   2414  HA  PHE B   1       3.965   1.273 -32.280  1.00  0.00           H  
ATOM   2415 1HB  PHE B   1       6.610   2.615 -31.622  1.00  0.00           H  
ATOM   2416 2HB  PHE B   1       5.364   3.378 -32.598  1.00  0.00           H  
ATOM   2417  HD1 PHE B   1       6.340   2.327 -29.242  1.00  0.00           H  
ATOM   2418  HD2 PHE B   1       3.234   4.059 -31.609  1.00  0.00           H  
ATOM   2419  HE1 PHE B   1       5.228   3.134 -27.188  1.00  0.00           H  
ATOM   2420  HE2 PHE B   1       2.120   4.871 -29.557  1.00  0.00           H  
ATOM   2421  HZ  PHE B   1       3.117   4.406 -27.345  1.00  0.00           H  
ATOM   2422  N   THR B   2       5.594  -0.282 -34.023  1.00  0.00           N  
ATOM   2423  CA  THR B   2       6.057  -0.627 -35.355  1.00  0.00           C  
ATOM   2424  C   THR B   2       5.065  -0.123 -36.381  1.00  0.00           C  
ATOM   2425  O   THR B   2       5.432   0.144 -37.528  1.00  0.00           O  
ATOM   2426  CB  THR B   2       6.253  -2.146 -35.512  1.00  0.00           C  
ATOM   2427  OG1 THR B   2       7.318  -2.584 -34.658  1.00  0.00           O  
ATOM   2428  CG2 THR B   2       6.589  -2.494 -36.954  1.00  0.00           C  
ATOM   2429  H   THR B   2       5.307  -1.020 -33.396  1.00  0.00           H  
ATOM   2430  HA  THR B   2       7.019  -0.142 -35.522  1.00  0.00           H  
ATOM   2431  HB  THR B   2       5.338  -2.663 -35.223  1.00  0.00           H  
ATOM   2432  HG1 THR B   2       8.047  -1.962 -34.712  1.00  0.00           H  
ATOM   2433 1HG2 THR B   2       6.723  -3.572 -37.046  1.00  0.00           H  
ATOM   2434 2HG2 THR B   2       5.775  -2.173 -37.605  1.00  0.00           H  
ATOM   2435 3HG2 THR B   2       7.508  -1.988 -37.246  1.00  0.00           H  
ATOM   2436  N   LEU B   3       3.793  -0.018 -35.985  1.00  0.00           N  
ATOM   2437  CA  LEU B   3       2.754   0.460 -36.889  1.00  0.00           C  
ATOM   2438  C   LEU B   3       2.963   1.922 -37.247  1.00  0.00           C  
ATOM   2439  O   LEU B   3       2.295   2.454 -38.139  1.00  0.00           O  
ATOM   2440  CB  LEU B   3       1.371   0.278 -36.250  1.00  0.00           C  
ATOM   2441  CG  LEU B   3       0.948  -1.172 -35.981  1.00  0.00           C  
ATOM   2442  CD1 LEU B   3      -0.420  -1.186 -35.312  1.00  0.00           C  
ATOM   2443  CD2 LEU B   3       0.925  -1.946 -37.290  1.00  0.00           C  
ATOM   2444  H   LEU B   3       3.544  -0.275 -35.040  1.00  0.00           H  
ATOM   2445  HA  LEU B   3       2.796  -0.127 -37.805  1.00  0.00           H  
ATOM   2446 1HB  LEU B   3       1.354   0.810 -35.300  1.00  0.00           H  
ATOM   2447 2HB  LEU B   3       0.624   0.725 -36.906  1.00  0.00           H  
ATOM   2448  HG  LEU B   3       1.658  -1.637 -35.297  1.00  0.00           H  
ATOM   2449 1HD1 LEU B   3      -0.720  -2.216 -35.120  1.00  0.00           H  
ATOM   2450 2HD1 LEU B   3      -0.370  -0.642 -34.369  1.00  0.00           H  
ATOM   2451 3HD1 LEU B   3      -1.150  -0.711 -35.967  1.00  0.00           H  
ATOM   2452 1HD2 LEU B   3       0.625  -2.976 -37.099  1.00  0.00           H  
ATOM   2453 2HD2 LEU B   3       0.213  -1.482 -37.974  1.00  0.00           H  
ATOM   2454 3HD2 LEU B   3       1.919  -1.934 -37.738  1.00  0.00           H  
ATOM   2455  N   ILE B   4       3.879   2.600 -36.548  1.00  0.00           N  
ATOM   2456  CA  ILE B   4       4.184   3.972 -36.941  1.00  0.00           C  
ATOM   2457  C   ILE B   4       4.972   3.951 -38.235  1.00  0.00           C  
ATOM   2458  O   ILE B   4       4.745   4.771 -39.128  1.00  0.00           O  
ATOM   2459  CB  ILE B   4       4.984   4.710 -35.852  1.00  0.00           C  
ATOM   2460  CG1 ILE B   4       4.169   4.798 -34.559  1.00  0.00           C  
ATOM   2461  CG2 ILE B   4       5.378   6.099 -36.331  1.00  0.00           C  
ATOM   2462  CD1 ILE B   4       2.843   5.505 -34.719  1.00  0.00           C  
ATOM   2463  H   ILE B   4       4.365   2.195 -35.761  1.00  0.00           H  
ATOM   2464  HA  ILE B   4       3.246   4.505 -37.092  1.00  0.00           H  
ATOM   2465  HB  ILE B   4       5.886   4.147 -35.619  1.00  0.00           H  
ATOM   2466 1HG1 ILE B   4       3.978   3.794 -34.181  1.00  0.00           H  
ATOM   2467 2HG1 ILE B   4       4.747   5.326 -33.800  1.00  0.00           H  
ATOM   2468 1HG2 ILE B   4       5.942   6.607 -35.549  1.00  0.00           H  
ATOM   2469 2HG2 ILE B   4       5.994   6.014 -37.225  1.00  0.00           H  
ATOM   2470 3HG2 ILE B   4       4.481   6.673 -36.562  1.00  0.00           H  
ATOM   2471 1HD1 ILE B   4       2.324   5.527 -33.760  1.00  0.00           H  
ATOM   2472 2HD1 ILE B   4       3.014   6.526 -35.063  1.00  0.00           H  
ATOM   2473 3HD1 ILE B   4       2.233   4.973 -35.448  1.00  0.00           H  
ATOM   2474  N   GLU B   5       5.864   2.967 -38.368  1.00  0.00           N  
ATOM   2475  CA  GLU B   5       6.599   2.785 -39.613  1.00  0.00           C  
ATOM   2476  C   GLU B   5       5.678   2.284 -40.712  1.00  0.00           C  
ATOM   2477  O   GLU B   5       5.831   2.647 -41.884  1.00  0.00           O  
ATOM   2478  CB  GLU B   5       7.757   1.804 -39.417  1.00  0.00           C  
ATOM   2479  CG  GLU B   5       8.717   1.721 -40.595  1.00  0.00           C  
ATOM   2480  CD  GLU B   5       9.975   0.963 -40.272  1.00  0.00           C  
ATOM   2481  OE1 GLU B   5       9.874  -0.160 -39.838  1.00  0.00           O  
ATOM   2482  OE2 GLU B   5      11.037   1.507 -40.459  1.00  0.00           O  
ATOM   2483  H   GLU B   5       6.037   2.337 -37.598  1.00  0.00           H  
ATOM   2484  HA  GLU B   5       7.007   3.749 -39.918  1.00  0.00           H  
ATOM   2485 1HB  GLU B   5       8.332   2.092 -38.536  1.00  0.00           H  
ATOM   2486 2HB  GLU B   5       7.361   0.805 -39.237  1.00  0.00           H  
ATOM   2487 1HG  GLU B   5       8.214   1.230 -41.427  1.00  0.00           H  
ATOM   2488 2HG  GLU B   5       8.978   2.731 -40.909  1.00  0.00           H  
ATOM   2489  N   LEU B   6       4.685   1.474 -40.351  1.00  0.00           N  
ATOM   2490  CA  LEU B   6       3.632   1.138 -41.294  1.00  0.00           C  
ATOM   2491  C   LEU B   6       2.872   2.380 -41.723  1.00  0.00           C  
ATOM   2492  O   LEU B   6       2.483   2.521 -42.889  1.00  0.00           O  
ATOM   2493  CB  LEU B   6       2.662   0.126 -40.670  1.00  0.00           C  
ATOM   2494  CG  LEU B   6       1.496  -0.316 -41.563  1.00  0.00           C  
ATOM   2495  CD1 LEU B   6       2.042  -0.916 -42.852  1.00  0.00           C  
ATOM   2496  CD2 LEU B   6       0.634  -1.321 -40.813  1.00  0.00           C  
ATOM   2497  H   LEU B   6       4.654   1.086 -39.419  1.00  0.00           H  
ATOM   2498  HA  LEU B   6       4.087   0.688 -42.175  1.00  0.00           H  
ATOM   2499 1HB  LEU B   6       3.222  -0.765 -40.392  1.00  0.00           H  
ATOM   2500 2HB  LEU B   6       2.240   0.562 -39.765  1.00  0.00           H  
ATOM   2501  HG  LEU B   6       0.892   0.553 -41.829  1.00  0.00           H  
ATOM   2502 1HD1 LEU B   6       1.213  -1.230 -43.486  1.00  0.00           H  
ATOM   2503 2HD1 LEU B   6       2.638  -0.170 -43.377  1.00  0.00           H  
ATOM   2504 3HD1 LEU B   6       2.664  -1.778 -42.616  1.00  0.00           H  
ATOM   2505 1HD2 LEU B   6      -0.195  -1.634 -41.448  1.00  0.00           H  
ATOM   2506 2HD2 LEU B   6       1.237  -2.190 -40.548  1.00  0.00           H  
ATOM   2507 3HD2 LEU B   6       0.243  -0.859 -39.906  1.00  0.00           H  
ATOM   2508  N   MET B   7       2.653   3.296 -40.784  1.00  0.00           N  
ATOM   2509  CA  MET B   7       1.972   4.533 -41.126  1.00  0.00           C  
ATOM   2510  C   MET B   7       2.776   5.331 -42.136  1.00  0.00           C  
ATOM   2511  O   MET B   7       2.196   6.037 -42.960  1.00  0.00           O  
ATOM   2512  CB  MET B   7       1.717   5.363 -39.869  1.00  0.00           C  
ATOM   2513  CG  MET B   7       0.809   6.566 -40.082  1.00  0.00           C  
ATOM   2514  SD  MET B   7      -0.840   6.102 -40.646  1.00  0.00           S  
ATOM   2515  CE  MET B   7      -1.539   5.439 -39.137  1.00  0.00           C  
ATOM   2516  H   MET B   7       2.953   3.147 -39.831  1.00  0.00           H  
ATOM   2517  HA  MET B   7       1.013   4.285 -41.582  1.00  0.00           H  
ATOM   2518 1HB  MET B   7       1.263   4.734 -39.104  1.00  0.00           H  
ATOM   2519 2HB  MET B   7       2.666   5.726 -39.474  1.00  0.00           H  
ATOM   2520 1HG  MET B   7       0.711   7.118 -39.148  1.00  0.00           H  
ATOM   2521 2HG  MET B   7       1.252   7.229 -40.825  1.00  0.00           H  
ATOM   2522 1HE  MET B   7      -2.561   5.108 -39.324  1.00  0.00           H  
ATOM   2523 2HE  MET B   7      -0.939   4.593 -38.798  1.00  0.00           H  
ATOM   2524 3HE  MET B   7      -1.544   6.212 -38.367  1.00  0.00           H  
ATOM   2525  N   ILE B   8       4.107   5.204 -42.109  1.00  0.00           N  
ATOM   2526  CA  ILE B   8       4.928   5.781 -43.171  1.00  0.00           C  
ATOM   2527  C   ILE B   8       4.537   5.180 -44.510  1.00  0.00           C  
ATOM   2528  O   ILE B   8       4.384   5.882 -45.510  1.00  0.00           O  
ATOM   2529  CB  ILE B   8       6.427   5.545 -42.913  1.00  0.00           C  
ATOM   2530  CG1 ILE B   8       6.884   6.315 -41.672  1.00  0.00           C  
ATOM   2531  CG2 ILE B   8       7.247   5.953 -44.128  1.00  0.00           C  
ATOM   2532  CD1 ILE B   8       8.266   5.935 -41.191  1.00  0.00           C  
ATOM   2533  H   ILE B   8       4.557   4.708 -41.354  1.00  0.00           H  
ATOM   2534  HA  ILE B   8       4.753   6.856 -43.198  1.00  0.00           H  
ATOM   2535  HB  ILE B   8       6.599   4.488 -42.709  1.00  0.00           H  
ATOM   2536 1HG1 ILE B   8       6.878   7.384 -41.884  1.00  0.00           H  
ATOM   2537 2HG1 ILE B   8       6.181   6.141 -40.857  1.00  0.00           H  
ATOM   2538 1HG2 ILE B   8       8.304   5.779 -43.928  1.00  0.00           H  
ATOM   2539 2HG2 ILE B   8       6.939   5.362 -44.989  1.00  0.00           H  
ATOM   2540 3HG2 ILE B   8       7.086   7.010 -44.337  1.00  0.00           H  
ATOM   2541 1HD1 ILE B   8       8.518   6.523 -40.308  1.00  0.00           H  
ATOM   2542 2HD1 ILE B   8       8.284   4.875 -40.938  1.00  0.00           H  
ATOM   2543 3HD1 ILE B   8       8.992   6.134 -41.978  1.00  0.00           H  
ATOM   2544  N   VAL B   9       4.396   3.852 -44.532  1.00  0.00           N  
ATOM   2545  CA  VAL B   9       4.000   3.180 -45.764  1.00  0.00           C  
ATOM   2546  C   VAL B   9       2.606   3.621 -46.152  1.00  0.00           C  
ATOM   2547  O   VAL B   9       2.318   3.866 -47.330  1.00  0.00           O  
ATOM   2548  CB  VAL B   9       4.030   1.650 -45.589  1.00  0.00           C  
ATOM   2549  CG1 VAL B   9       3.432   0.964 -46.808  1.00  0.00           C  
ATOM   2550  CG2 VAL B   9       5.458   1.184 -45.353  1.00  0.00           C  
ATOM   2551  H   VAL B   9       4.561   3.301 -43.702  1.00  0.00           H  
ATOM   2552  HA  VAL B   9       4.706   3.452 -46.549  1.00  0.00           H  
ATOM   2553  HB  VAL B   9       3.412   1.379 -44.733  1.00  0.00           H  
ATOM   2554 1HG1 VAL B   9       3.461  -0.117 -46.668  1.00  0.00           H  
ATOM   2555 2HG1 VAL B   9       2.398   1.285 -46.937  1.00  0.00           H  
ATOM   2556 3HG1 VAL B   9       4.008   1.229 -47.694  1.00  0.00           H  
ATOM   2557 1HG2 VAL B   9       5.471   0.101 -45.230  1.00  0.00           H  
ATOM   2558 2HG2 VAL B   9       6.077   1.460 -46.207  1.00  0.00           H  
ATOM   2559 3HG2 VAL B   9       5.851   1.656 -44.453  1.00  0.00           H  
ATOM   2560  N   ILE B  10       1.726   3.774 -45.174  1.00  0.00           N  
ATOM   2561  CA  ILE B  10       0.373   4.207 -45.478  1.00  0.00           C  
ATOM   2562  C   ILE B  10       0.412   5.581 -46.134  1.00  0.00           C  
ATOM   2563  O   ILE B  10      -0.256   5.827 -47.141  1.00  0.00           O  
ATOM   2564  CB  ILE B  10      -0.496   4.255 -44.208  1.00  0.00           C  
ATOM   2565  CG1 ILE B  10      -0.756   2.840 -43.685  1.00  0.00           C  
ATOM   2566  CG2 ILE B  10      -1.808   4.971 -44.488  1.00  0.00           C  
ATOM   2567  CD1 ILE B  10      -1.358   2.802 -42.299  1.00  0.00           C  
ATOM   2568  H   ILE B  10       1.981   3.594 -44.213  1.00  0.00           H  
ATOM   2569  HA  ILE B  10      -0.071   3.492 -46.169  1.00  0.00           H  
ATOM   2570  HB  ILE B  10       0.037   4.789 -43.422  1.00  0.00           H  
ATOM   2571 1HG1 ILE B  10      -1.429   2.319 -44.364  1.00  0.00           H  
ATOM   2572 2HG1 ILE B  10       0.181   2.282 -43.663  1.00  0.00           H  
ATOM   2573 1HG2 ILE B  10      -2.411   4.995 -43.581  1.00  0.00           H  
ATOM   2574 2HG2 ILE B  10      -1.604   5.990 -44.815  1.00  0.00           H  
ATOM   2575 3HG2 ILE B  10      -2.352   4.441 -45.271  1.00  0.00           H  
ATOM   2576 1HD1 ILE B  10      -1.512   1.766 -41.997  1.00  0.00           H  
ATOM   2577 2HD1 ILE B  10      -0.682   3.288 -41.595  1.00  0.00           H  
ATOM   2578 3HD1 ILE B  10      -2.314   3.324 -42.304  1.00  0.00           H  
ATOM   2579  N   ALA B  11       1.219   6.483 -45.574  1.00  0.00           N  
ATOM   2580  CA  ALA B  11       1.369   7.808 -46.161  1.00  0.00           C  
ATOM   2581  C   ALA B  11       1.954   7.726 -47.559  1.00  0.00           C  
ATOM   2582  O   ALA B  11       1.574   8.492 -48.449  1.00  0.00           O  
ATOM   2583  CB  ALA B  11       2.238   8.692 -45.268  1.00  0.00           C  
ATOM   2584  H   ALA B  11       1.734   6.256 -44.735  1.00  0.00           H  
ATOM   2585  HA  ALA B  11       0.379   8.258 -46.239  1.00  0.00           H  
ATOM   2586 1HB  ALA B  11       2.341   9.678 -45.720  1.00  0.00           H  
ATOM   2587 2HB  ALA B  11       1.772   8.789 -44.287  1.00  0.00           H  
ATOM   2588 3HB  ALA B  11       3.223   8.240 -45.157  1.00  0.00           H  
ATOM   2589  N   ILE B  12       2.890   6.802 -47.775  1.00  0.00           N  
ATOM   2590  CA  ILE B  12       3.419   6.624 -49.123  1.00  0.00           C  
ATOM   2591  C   ILE B  12       2.313   6.159 -50.055  1.00  0.00           C  
ATOM   2592  O   ILE B  12       2.111   6.731 -51.134  1.00  0.00           O  
ATOM   2593  CB  ILE B  12       4.577   5.609 -49.142  1.00  0.00           C  
ATOM   2594  CG1 ILE B  12       5.800   6.181 -48.422  1.00  0.00           C  
ATOM   2595  CG2 ILE B  12       4.927   5.228 -50.573  1.00  0.00           C  
ATOM   2596  CD1 ILE B  12       6.872   5.155 -48.130  1.00  0.00           C  
ATOM   2597  H   ILE B  12       3.243   6.221 -47.027  1.00  0.00           H  
ATOM   2598  HA  ILE B  12       3.801   7.582 -49.474  1.00  0.00           H  
ATOM   2599  HB  ILE B  12       4.282   4.711 -48.599  1.00  0.00           H  
ATOM   2600 1HG1 ILE B  12       6.241   6.973 -49.026  1.00  0.00           H  
ATOM   2601 2HG1 ILE B  12       5.490   6.626 -47.476  1.00  0.00           H  
ATOM   2602 1HG2 ILE B  12       5.747   4.511 -50.567  1.00  0.00           H  
ATOM   2603 2HG2 ILE B  12       4.058   4.782 -51.053  1.00  0.00           H  
ATOM   2604 3HG2 ILE B  12       5.228   6.119 -51.123  1.00  0.00           H  
ATOM   2605 1HD1 ILE B  12       7.706   5.636 -47.618  1.00  0.00           H  
ATOM   2606 2HD1 ILE B  12       6.461   4.369 -47.496  1.00  0.00           H  
ATOM   2607 3HD1 ILE B  12       7.223   4.721 -49.065  1.00  0.00           H  
ATOM   2608  N   VAL B  13       1.562   5.140 -49.646  1.00  0.00           N  
ATOM   2609  CA  VAL B  13       0.503   4.635 -50.505  1.00  0.00           C  
ATOM   2610  C   VAL B  13      -0.472   5.754 -50.830  1.00  0.00           C  
ATOM   2611  O   VAL B  13      -0.967   5.849 -51.960  1.00  0.00           O  
ATOM   2612  CB  VAL B  13      -0.246   3.475 -49.823  1.00  0.00           C  
ATOM   2613  CG1 VAL B  13      -1.514   3.135 -50.590  1.00  0.00           C  
ATOM   2614  CG2 VAL B  13       0.665   2.261 -49.720  1.00  0.00           C  
ATOM   2615  H   VAL B  13       1.713   4.708 -48.746  1.00  0.00           H  
ATOM   2616  HA  VAL B  13       0.953   4.263 -51.426  1.00  0.00           H  
ATOM   2617  HB  VAL B  13      -0.549   3.788 -48.824  1.00  0.00           H  
ATOM   2618 1HG1 VAL B  13      -2.031   2.313 -50.094  1.00  0.00           H  
ATOM   2619 2HG1 VAL B  13      -2.166   4.008 -50.620  1.00  0.00           H  
ATOM   2620 3HG1 VAL B  13      -1.256   2.839 -51.607  1.00  0.00           H  
ATOM   2621 1HG2 VAL B  13       0.129   1.445 -49.236  1.00  0.00           H  
ATOM   2622 2HG2 VAL B  13       0.972   1.951 -50.719  1.00  0.00           H  
ATOM   2623 3HG2 VAL B  13       1.546   2.515 -49.132  1.00  0.00           H  
ATOM   2624  N   GLY B  14      -0.748   6.601 -49.844  1.00  0.00           N  
ATOM   2625  CA  GLY B  14      -1.744   7.645 -49.991  1.00  0.00           C  
ATOM   2626  C   GLY B  14      -1.562   8.445 -51.265  1.00  0.00           C  
ATOM   2627  O   GLY B  14      -2.532   8.884 -51.882  1.00  0.00           O  
ATOM   2628  H   GLY B  14      -0.251   6.515 -48.969  1.00  0.00           H  
ATOM   2629 1HA  GLY B  14      -2.739   7.201 -49.990  1.00  0.00           H  
ATOM   2630 2HA  GLY B  14      -1.691   8.320 -49.138  1.00  0.00           H  
ATOM   2631  N   ILE B  15      -0.307   8.634 -51.666  1.00  0.00           N  
ATOM   2632  CA  ILE B  15       0.008   9.386 -52.873  1.00  0.00           C  
ATOM   2633  C   ILE B  15       1.019   8.640 -53.737  1.00  0.00           C  
ATOM   2634  O   ILE B  15       1.876   9.253 -54.375  1.00  0.00           O  
ATOM   2635  CB  ILE B  15       0.559  10.780 -52.523  1.00  0.00           C  
ATOM   2636  CG1 ILE B  15       1.786  10.657 -51.616  1.00  0.00           C  
ATOM   2637  CG2 ILE B  15      -0.517  11.625 -51.856  1.00  0.00           C  
ATOM   2638  CD1 ILE B  15       2.524  11.960 -51.407  1.00  0.00           C  
ATOM   2639  H   ILE B  15       0.446   8.246 -51.117  1.00  0.00           H  
ATOM   2640  HA  ILE B  15      -0.907   9.511 -53.451  1.00  0.00           H  
ATOM   2641  HB  ILE B  15       0.888  11.281 -53.433  1.00  0.00           H  
ATOM   2642 1HG1 ILE B  15       1.482  10.277 -50.642  1.00  0.00           H  
ATOM   2643 2HG1 ILE B  15       2.484   9.937 -52.044  1.00  0.00           H  
ATOM   2644 1HG2 ILE B  15      -0.110  12.607 -51.615  1.00  0.00           H  
ATOM   2645 2HG2 ILE B  15      -1.362  11.738 -52.534  1.00  0.00           H  
ATOM   2646 3HG2 ILE B  15      -0.849  11.134 -50.941  1.00  0.00           H  
ATOM   2647 1HD1 ILE B  15       3.381  11.792 -50.755  1.00  0.00           H  
ATOM   2648 2HD1 ILE B  15       2.869  12.342 -52.369  1.00  0.00           H  
ATOM   2649 3HD1 ILE B  15       1.856  12.687 -50.947  1.00  0.00           H  
ATOM   2650  N   LEU B  16       0.916   7.315 -53.752  1.00  0.00           N  
ATOM   2651  CA  LEU B  16       1.705   6.496 -54.664  1.00  0.00           C  
ATOM   2652  C   LEU B  16       0.848   5.429 -55.339  1.00  0.00           C  
ATOM   2653  O   LEU B  16       0.919   5.242 -56.553  1.00  0.00           O  
ATOM   2654  CB  LEU B  16       2.861   5.829 -53.907  1.00  0.00           C  
ATOM   2655  CG  LEU B  16       3.770   4.923 -54.747  1.00  0.00           C  
ATOM   2656  CD1 LEU B  16       4.377   5.729 -55.888  1.00  0.00           C  
ATOM   2657  CD2 LEU B  16       4.854   4.329 -53.860  1.00  0.00           C  
ATOM   2658  H   LEU B  16       0.275   6.864 -53.116  1.00  0.00           H  
ATOM   2659  HA  LEU B  16       2.118   7.141 -55.439  1.00  0.00           H  
ATOM   2660 1HB  LEU B  16       3.483   6.607 -53.468  1.00  0.00           H  
ATOM   2661 2HB  LEU B  16       2.446   5.226 -53.100  1.00  0.00           H  
ATOM   2662  HG  LEU B  16       3.179   4.119 -55.185  1.00  0.00           H  
ATOM   2663 1HD1 LEU B  16       5.024   5.085 -56.484  1.00  0.00           H  
ATOM   2664 2HD1 LEU B  16       3.581   6.125 -56.517  1.00  0.00           H  
ATOM   2665 3HD1 LEU B  16       4.963   6.552 -55.480  1.00  0.00           H  
ATOM   2666 1HD2 LEU B  16       5.500   3.685 -54.456  1.00  0.00           H  
ATOM   2667 2HD2 LEU B  16       5.447   5.133 -53.423  1.00  0.00           H  
ATOM   2668 3HD2 LEU B  16       4.393   3.744 -53.064  1.00  0.00           H  
ATOM   2669  N   ALA B  17       0.040   4.737 -54.544  1.00  0.00           N  
ATOM   2670  CA  ALA B  17      -0.896   3.751 -55.074  1.00  0.00           C  
ATOM   2671  C   ALA B  17      -2.340   4.154 -54.798  1.00  0.00           C  
ATOM   2672  O   ALA B  17      -3.209   3.300 -54.612  1.00  0.00           O  
ATOM   2673  CB  ALA B  17      -0.603   2.376 -54.491  1.00  0.00           C  
ATOM   2674  H   ALA B  17       0.073   4.897 -53.548  1.00  0.00           H  
ATOM   2675  HA  ALA B  17      -0.763   3.705 -56.155  1.00  0.00           H  
ATOM   2676 1HB  ALA B  17      -1.310   1.651 -54.896  1.00  0.00           H  
ATOM   2677 2HB  ALA B  17       0.412   2.078 -54.752  1.00  0.00           H  
ATOM   2678 3HB  ALA B  17      -0.703   2.413 -53.407  1.00  0.00           H  
ATOM   2679  N   ALA B  18      -2.590   5.460 -54.772  1.00  0.00           N  
ATOM   2680  CA  ALA B  18      -3.934   5.972 -54.591  1.00  0.00           C  
ATOM   2681  C   ALA B  18      -4.110   7.359 -55.186  1.00  0.00           C  
ATOM   2682  O   ALA B  18      -3.454   8.307 -54.753  1.00  0.00           O  
ATOM   2683  CB  ALA B  18      -4.294   5.990 -53.114  1.00  0.00           C  
ATOM   2684  H   ALA B  18      -1.826   6.112 -54.882  1.00  0.00           H  
ATOM   2685  HA  ALA B  18      -4.623   5.309 -55.115  1.00  0.00           H  
ATOM   2686 1HB  ALA B  18      -5.306   6.377 -52.990  1.00  0.00           H  
ATOM   2687 2HB  ALA B  18      -4.242   4.977 -52.714  1.00  0.00           H  
ATOM   2688 3HB  ALA B  18      -3.595   6.628 -52.576  1.00  0.00           H  
ATOM   2689  N   VAL B  19      -4.968   7.453 -56.201  1.00  0.00           N  
ATOM   2690  CA  VAL B  19      -5.185   8.664 -57.013  1.00  0.00           C  
ATOM   2691  C   VAL B  19      -3.925   9.401 -57.511  1.00  0.00           C  
ATOM   2692  O   VAL B  19      -3.975  10.592 -57.831  1.00  0.00           O  
ATOM   2693  CB  VAL B  19      -6.029   9.661 -56.197  1.00  0.00           C  
ATOM   2694  CG1 VAL B  19      -6.307  10.915 -57.012  1.00  0.00           C  
ATOM   2695  CG2 VAL B  19      -7.328   9.002 -55.760  1.00  0.00           C  
ATOM   2696  H   VAL B  19      -5.498   6.619 -56.411  1.00  0.00           H  
ATOM   2697  HA  VAL B  19      -5.726   8.382 -57.917  1.00  0.00           H  
ATOM   2698  HB  VAL B  19      -5.462   9.968 -55.318  1.00  0.00           H  
ATOM   2699 1HG1 VAL B  19      -6.905  11.608 -56.420  1.00  0.00           H  
ATOM   2700 2HG1 VAL B  19      -5.364  11.389 -57.284  1.00  0.00           H  
ATOM   2701 3HG1 VAL B  19      -6.854  10.647 -57.916  1.00  0.00           H  
ATOM   2702 1HG2 VAL B  19      -7.920   9.712 -55.183  1.00  0.00           H  
ATOM   2703 2HG2 VAL B  19      -7.892   8.690 -56.639  1.00  0.00           H  
ATOM   2704 3HG2 VAL B  19      -7.105   8.131 -55.144  1.00  0.00           H  
ATOM   2705  N   ALA B  20      -2.811   8.685 -57.618  1.00  0.00           N  
ATOM   2706  CA  ALA B  20      -1.536   9.297 -57.974  1.00  0.00           C  
ATOM   2707  C   ALA B  20      -1.353   9.346 -59.488  1.00  0.00           C  
ATOM   2708  O   ALA B  20      -0.488   8.665 -60.040  1.00  0.00           O  
ATOM   2709  CB  ALA B  20      -0.385   8.545 -57.325  1.00  0.00           C  
ATOM   2710  H   ALA B  20      -2.849   7.691 -57.447  1.00  0.00           H  
ATOM   2711  HA  ALA B  20      -1.537  10.323 -57.604  1.00  0.00           H  
ATOM   2712 1HB  ALA B  20       0.558   9.015 -57.602  1.00  0.00           H  
ATOM   2713 2HB  ALA B  20      -0.499   8.570 -56.241  1.00  0.00           H  
ATOM   2714 3HB  ALA B  20      -0.389   7.511 -57.667  1.00  0.00           H  
ATOM   2715  N   LEU B  21      -2.169  10.156 -60.152  1.00  0.00           N  
ATOM   2716  CA  LEU B  21      -2.097  10.302 -61.601  1.00  0.00           C  
ATOM   2717  C   LEU B  21      -1.854  11.753 -62.001  1.00  0.00           C  
ATOM   2718  O   LEU B  21      -2.753  12.425 -62.508  1.00  0.00           O  
ATOM   2719  CB  LEU B  21      -3.392   9.797 -62.249  1.00  0.00           C  
ATOM   2720  CG  LEU B  21      -3.549   8.273 -62.324  1.00  0.00           C  
ATOM   2721  CD1 LEU B  21      -4.241   7.770 -61.064  1.00  0.00           C  
ATOM   2722  CD2 LEU B  21      -4.343   7.904 -63.568  1.00  0.00           C  
ATOM   2723  H   LEU B  21      -2.858  10.687 -59.638  1.00  0.00           H  
ATOM   2724  HA  LEU B  21      -1.264   9.702 -61.968  1.00  0.00           H  
ATOM   2725 1HB  LEU B  21      -4.238  10.189 -61.687  1.00  0.00           H  
ATOM   2726 2HB  LEU B  21      -3.447  10.186 -63.266  1.00  0.00           H  
ATOM   2727  HG  LEU B  21      -2.564   7.808 -62.371  1.00  0.00           H  
ATOM   2728 1HD1 LEU B  21      -4.352   6.687 -61.117  1.00  0.00           H  
ATOM   2729 2HD1 LEU B  21      -3.641   8.030 -60.192  1.00  0.00           H  
ATOM   2730 3HD1 LEU B  21      -5.224   8.232 -60.981  1.00  0.00           H  
ATOM   2731 1HD2 LEU B  21      -4.454   6.821 -63.622  1.00  0.00           H  
ATOM   2732 2HD2 LEU B  21      -5.329   8.368 -63.521  1.00  0.00           H  
ATOM   2733 3HD2 LEU B  21      -3.817   8.260 -64.454  1.00  0.00           H  
ATOM   2734  N   PRO B  22      -0.636  12.230 -61.767  1.00  0.00           N  
ATOM   2735  CA  PRO B  22      -0.259  13.593 -62.149  1.00  0.00           C  
ATOM   2736  C   PRO B  22      -0.255  13.757 -63.658  1.00  0.00           C  
ATOM   2737  O   PRO B  22       0.545  13.127 -64.343  1.00  0.00           O  
ATOM   2738  CB  PRO B  22       1.149  13.743 -61.564  1.00  0.00           C  
ATOM   2739  CG  PRO B  22       1.666  12.347 -61.493  1.00  0.00           C  
ATOM   2740  CD  PRO B  22       0.466  11.522 -61.111  1.00  0.00           C  
ATOM   2741  HA  PRO B  22      -0.955  14.306 -61.682  1.00  0.00           H  
ATOM   2742 1HB  PRO B  22       1.758  14.392 -62.210  1.00  0.00           H  
ATOM   2743 2HB  PRO B  22       1.097  14.229 -60.578  1.00  0.00           H  
ATOM   2744 1HG  PRO B  22       2.093  12.050 -62.463  1.00  0.00           H  
ATOM   2745 2HG  PRO B  22       2.479  12.280 -60.755  1.00  0.00           H  
ATOM   2746 1HD  PRO B  22       0.582  10.501 -61.503  1.00  0.00           H  
ATOM   2747 2HD  PRO B  22       0.365  11.508 -60.016  1.00  0.00           H  
ATOM   2748  N   ALA B  23      -1.182  14.548 -64.189  1.00  0.00           N  
ATOM   2749  CA  ALA B  23      -1.339  14.735 -65.627  1.00  0.00           C  
ATOM   2750  C   ALA B  23      -1.632  13.507 -66.470  1.00  0.00           C  
ATOM   2751  O   ALA B  23      -1.440  13.563 -67.682  1.00  0.00           O  
ATOM   2752  CB  ALA B  23      -0.073  15.381 -66.183  1.00  0.00           C  
ATOM   2753  H   ALA B  23      -1.800  15.037 -63.559  1.00  0.00           H  
ATOM   2754  HA  ALA B  23      -2.204  15.379 -65.791  1.00  0.00           H  
ATOM   2755 1HB  ALA B  23      -0.181  15.526 -67.258  1.00  0.00           H  
ATOM   2756 2HB  ALA B  23       0.085  16.346 -65.701  1.00  0.00           H  
ATOM   2757 3HB  ALA B  23       0.780  14.734 -65.988  1.00  0.00           H  
ATOM   2758  N   TYR B  24      -2.071  12.396 -65.894  1.00  0.00           N  
ATOM   2759  CA  TYR B  24      -2.347  11.260 -66.767  1.00  0.00           C  
ATOM   2760  C   TYR B  24      -3.803  11.250 -67.214  1.00  0.00           C  
ATOM   2761  O   TYR B  24      -4.156  10.577 -68.189  1.00  0.00           O  
ATOM   2762  CB  TYR B  24      -2.000   9.946 -66.063  1.00  0.00           C  
ATOM   2763  CG  TYR B  24      -0.515   9.728 -65.876  1.00  0.00           C  
ATOM   2764  CD1 TYR B  24       0.072   9.972 -64.643  1.00  0.00           C  
ATOM   2765  CD2 TYR B  24       0.259   9.282 -66.937  1.00  0.00           C  
ATOM   2766  CE1 TYR B  24       1.429   9.773 -64.473  1.00  0.00           C  
ATOM   2767  CE2 TYR B  24       1.615   9.083 -66.766  1.00  0.00           C  
ATOM   2768  CZ  TYR B  24       2.200   9.326 -65.540  1.00  0.00           C  
ATOM   2769  OH  TYR B  24       3.550   9.127 -65.370  1.00  0.00           O  
ATOM   2770  H   TYR B  24      -2.221  12.301 -64.899  1.00  0.00           H  
ATOM   2771  HA  TYR B  24      -1.728  11.351 -67.659  1.00  0.00           H  
ATOM   2772 1HB  TYR B  24      -2.474   9.924 -65.080  1.00  0.00           H  
ATOM   2773 2HB  TYR B  24      -2.398   9.110 -66.637  1.00  0.00           H  
ATOM   2774  HD1 TYR B  24      -0.536  10.322 -63.809  1.00  0.00           H  
ATOM   2775  HD2 TYR B  24      -0.203   9.091 -67.906  1.00  0.00           H  
ATOM   2776  HE1 TYR B  24       1.890   9.965 -63.505  1.00  0.00           H  
ATOM   2777  HE2 TYR B  24       2.224   8.733 -67.601  1.00  0.00           H  
ATOM   2778  HH  TYR B  24       3.825   9.501 -64.529  1.00  0.00           H  
ATOM   2779  N   GLN B  25      -4.669  11.989 -66.512  1.00  0.00           N  
ATOM   2780  CA  GLN B  25      -5.978  12.259 -67.086  1.00  0.00           C  
ATOM   2781  C   GLN B  25      -5.805  13.161 -68.293  1.00  0.00           C  
ATOM   2782  O   GLN B  25      -6.539  13.044 -69.281  1.00  0.00           O  
ATOM   2783  CB  GLN B  25      -6.910  12.910 -66.060  1.00  0.00           C  
ATOM   2784  CG  GLN B  25      -8.336  13.100 -66.548  1.00  0.00           C  
ATOM   2785  CD  GLN B  25      -9.020  11.783 -66.863  1.00  0.00           C  
ATOM   2786  OE1 GLN B  25      -8.895  10.808 -66.116  1.00  0.00           O  
ATOM   2787  NE2 GLN B  25      -9.748  11.746 -67.973  1.00  0.00           N  
ATOM   2788  H   GLN B  25      -4.444  12.363 -65.600  1.00  0.00           H  
ATOM   2789  HA  GLN B  25      -6.421  11.314 -67.399  1.00  0.00           H  
ATOM   2790 1HB  GLN B  25      -6.941  12.299 -65.158  1.00  0.00           H  
ATOM   2791 2HB  GLN B  25      -6.517  13.887 -65.780  1.00  0.00           H  
ATOM   2792 1HG  GLN B  25      -8.910  13.605 -65.771  1.00  0.00           H  
ATOM   2793 2HG  GLN B  25      -8.322  13.703 -67.455  1.00  0.00           H  
ATOM   2794 1HE2 GLN B  25     -10.223  10.904 -68.233  1.00  0.00           H  
ATOM   2795 2HE2 GLN B  25      -9.822  12.559 -68.550  1.00  0.00           H  
ATOM   2796  N   ASP B  26      -4.814  14.043 -68.231  1.00  0.00           N  
ATOM   2797  CA  ASP B  26      -4.442  14.883 -69.360  1.00  0.00           C  
ATOM   2798  C   ASP B  26      -3.884  14.056 -70.512  1.00  0.00           C  
ATOM   2799  O   ASP B  26      -4.034  14.432 -71.681  1.00  0.00           O  
ATOM   2800  CB  ASP B  26      -3.411  15.929 -68.929  1.00  0.00           C  
ATOM   2801  CG  ASP B  26      -3.986  16.972 -67.981  1.00  0.00           C  
ATOM   2802  OD1 ASP B  26      -5.187  17.084 -67.910  1.00  0.00           O  
ATOM   2803  OD2 ASP B  26      -3.219  17.648 -67.337  1.00  0.00           O  
ATOM   2804  H   ASP B  26      -4.302  14.129 -67.364  1.00  0.00           H  
ATOM   2805  HA  ASP B  26      -5.335  15.398 -69.716  1.00  0.00           H  
ATOM   2806 1HB  ASP B  26      -2.574  15.433 -68.436  1.00  0.00           H  
ATOM   2807 2HB  ASP B  26      -3.018  16.437 -69.810  1.00  0.00           H  
ATOM   2808  N   TYR B  27      -3.238  12.934 -70.213  1.00  0.00           N  
ATOM   2809  CA  TYR B  27      -2.804  12.043 -71.284  1.00  0.00           C  
ATOM   2810  C   TYR B  27      -3.978  11.443 -72.034  1.00  0.00           C  
ATOM   2811  O   TYR B  27      -3.895  11.219 -73.249  1.00  0.00           O  
ATOM   2812  CB  TYR B  27      -1.917  10.929 -70.724  1.00  0.00           C  
ATOM   2813  CG  TYR B  27      -0.513  11.378 -70.385  1.00  0.00           C  
ATOM   2814  CD1 TYR B  27      -0.233  12.729 -70.242  1.00  0.00           C  
ATOM   2815  CD2 TYR B  27       0.494  10.439 -70.217  1.00  0.00           C  
ATOM   2816  CE1 TYR B  27       1.049  13.140 -69.933  1.00  0.00           C  
ATOM   2817  CE2 TYR B  27       1.776  10.850 -69.907  1.00  0.00           C  
ATOM   2818  CZ  TYR B  27       2.055  12.194 -69.765  1.00  0.00           C  
ATOM   2819  OH  TYR B  27       3.332  12.603 -69.457  1.00  0.00           O  
ATOM   2820  H   TYR B  27      -3.040  12.684 -69.254  1.00  0.00           H  
ATOM   2821  HA  TYR B  27      -2.225  12.623 -72.003  1.00  0.00           H  
ATOM   2822 1HB  TYR B  27      -2.372  10.521 -69.820  1.00  0.00           H  
ATOM   2823 2HB  TYR B  27      -1.849  10.119 -71.449  1.00  0.00           H  
ATOM   2824  HD1 TYR B  27      -1.025  13.467 -70.374  1.00  0.00           H  
ATOM   2825  HD2 TYR B  27       0.274   9.378 -70.330  1.00  0.00           H  
ATOM   2826  HE1 TYR B  27       1.270  14.201 -69.820  1.00  0.00           H  
ATOM   2827  HE2 TYR B  27       2.568  10.112 -69.776  1.00  0.00           H  
ATOM   2828  HH  TYR B  27       3.882  11.833 -69.290  1.00  0.00           H  
ATOM   2829  N   THR B  28      -5.079  11.171 -71.323  1.00  0.00           N  
ATOM   2830  CA  THR B  28      -6.314  10.750 -71.980  1.00  0.00           C  
ATOM   2831  C   THR B  28      -6.775  11.794 -72.965  1.00  0.00           C  
ATOM   2832  O   THR B  28      -7.181  11.475 -74.088  1.00  0.00           O  
ATOM   2833  CB  THR B  28      -7.433  10.479 -70.957  1.00  0.00           C  
ATOM   2834  OG1 THR B  28      -7.037   9.413 -70.084  1.00  0.00           O  
ATOM   2835  CG2 THR B  28      -8.722  10.096 -71.667  1.00  0.00           C  
ATOM   2836  H   THR B  28      -5.062  11.258 -70.317  1.00  0.00           H  
ATOM   2837  HA  THR B  28      -6.118   9.826 -72.523  1.00  0.00           H  
ATOM   2838  HB  THR B  28      -7.606  11.374 -70.360  1.00  0.00           H  
ATOM   2839  HG1 THR B  28      -6.422   9.749 -69.428  1.00  0.00           H  
ATOM   2840 1HG2 THR B  28      -9.502   9.908 -70.930  1.00  0.00           H  
ATOM   2841 2HG2 THR B  28      -9.032  10.909 -72.324  1.00  0.00           H  
ATOM   2842 3HG2 THR B  28      -8.558   9.195 -72.259  1.00  0.00           H  
ATOM   2843  N   ALA B  29      -6.677  13.057 -72.560  1.00  0.00           N  
ATOM   2844  CA  ALA B  29      -7.023  14.176 -73.414  1.00  0.00           C  
ATOM   2845  C   ALA B  29      -6.127  14.250 -74.635  1.00  0.00           C  
ATOM   2846  O   ALA B  29      -6.582  14.592 -75.726  1.00  0.00           O  
ATOM   2847  CB  ALA B  29      -6.921  15.468 -72.621  1.00  0.00           C  
ATOM   2848  H   ALA B  29      -6.350  13.237 -71.621  1.00  0.00           H  
ATOM   2849  HA  ALA B  29      -8.045  14.031 -73.765  1.00  0.00           H  
ATOM   2850 1HB  ALA B  29      -7.181  16.310 -73.263  1.00  0.00           H  
ATOM   2851 2HB  ALA B  29      -7.608  15.431 -71.775  1.00  0.00           H  
ATOM   2852 3HB  ALA B  29      -5.903  15.591 -72.257  1.00  0.00           H  
ATOM   2853  N   ARG B  30      -4.849  13.922 -74.455  1.00  0.00           N  
ATOM   2854  CA  ARG B  30      -3.912  13.871 -75.571  1.00  0.00           C  
ATOM   2855  C   ARG B  30      -4.386  12.890 -76.631  1.00  0.00           C  
ATOM   2856  O   ARG B  30      -4.348  13.183 -77.827  1.00  0.00           O  
ATOM   2857  CB  ARG B  30      -2.525  13.467 -75.094  1.00  0.00           C  
ATOM   2858  CG  ARG B  30      -1.811  14.509 -74.247  1.00  0.00           C  
ATOM   2859  CD  ARG B  30      -0.587  13.957 -73.613  1.00  0.00           C  
ATOM   2860  NE  ARG B  30       0.493  13.790 -74.573  1.00  0.00           N  
ATOM   2861  CZ  ARG B  30       1.503  12.909 -74.442  1.00  0.00           C  
ATOM   2862  NH1 ARG B  30       1.558  12.123 -73.390  1.00  0.00           N  
ATOM   2863  NH2 ARG B  30       2.439  12.833 -75.373  1.00  0.00           N  
ATOM   2864  H   ARG B  30      -4.518  13.704 -73.525  1.00  0.00           H  
ATOM   2865  HA  ARG B  30      -3.849  14.865 -76.016  1.00  0.00           H  
ATOM   2866 1HB  ARG B  30      -2.595  12.555 -74.503  1.00  0.00           H  
ATOM   2867 2HB  ARG B  30      -1.892  13.252 -75.955  1.00  0.00           H  
ATOM   2868 1HG  ARG B  30      -1.522  15.352 -74.876  1.00  0.00           H  
ATOM   2869 2HG  ARG B  30      -2.479  14.857 -73.458  1.00  0.00           H  
ATOM   2870 1HD  ARG B  30      -0.246  14.634 -72.831  1.00  0.00           H  
ATOM   2871 2HD  ARG B  30      -0.810  12.983 -73.179  1.00  0.00           H  
ATOM   2872  HE  ARG B  30       0.485  14.377 -75.397  1.00  0.00           H  
ATOM   2873 1HH1 ARG B  30       0.843  12.181 -72.679  1.00  0.00           H  
ATOM   2874 2HH1 ARG B  30       2.315  11.462 -73.292  1.00  0.00           H  
ATOM   2875 1HH2 ARG B  30       2.397  13.437 -76.182  1.00  0.00           H  
ATOM   2876 2HH2 ARG B  30       3.196  12.173 -75.275  1.00  0.00           H  
ATOM   2877  N   ALA B  31      -4.885  11.736 -76.196  1.00  0.00           N  
ATOM   2878  CA  ALA B  31      -5.443  10.778 -77.141  1.00  0.00           C  
ATOM   2879  C   ALA B  31      -6.654  11.362 -77.850  1.00  0.00           C  
ATOM   2880  O   ALA B  31      -6.808  11.216 -79.068  1.00  0.00           O  
ATOM   2881  CB  ALA B  31      -5.819   9.490 -76.417  1.00  0.00           C  
ATOM   2882  H   ALA B  31      -4.883  11.511 -75.211  1.00  0.00           H  
ATOM   2883  HA  ALA B  31      -4.683  10.561 -77.892  1.00  0.00           H  
ATOM   2884 1HB  ALA B  31      -6.235   8.780 -77.131  1.00  0.00           H  
ATOM   2885 2HB  ALA B  31      -4.931   9.061 -75.953  1.00  0.00           H  
ATOM   2886 3HB  ALA B  31      -6.559   9.708 -75.649  1.00  0.00           H  
ATOM   2887  N   GLN B  32      -7.521  12.031 -77.089  1.00  0.00           N  
ATOM   2888  CA  GLN B  32      -8.725  12.624 -77.658  1.00  0.00           C  
ATOM   2889  C   GLN B  32      -8.372  13.580 -78.785  1.00  0.00           C  
ATOM   2890  O   GLN B  32      -9.006  13.569 -79.845  1.00  0.00           O  
ATOM   2891  CB  GLN B  32      -9.529  13.357 -76.580  1.00  0.00           C  
ATOM   2892  CG  GLN B  32     -10.146  12.444 -75.535  1.00  0.00           C  
ATOM   2893  CD  GLN B  32     -10.903  13.213 -74.469  1.00  0.00           C  
ATOM   2894  OE1 GLN B  32     -10.395  14.188 -73.908  1.00  0.00           O  
ATOM   2895  NE2 GLN B  32     -12.125  12.778 -74.183  1.00  0.00           N  
ATOM   2896  H   GLN B  32      -7.343  12.131 -76.100  1.00  0.00           H  
ATOM   2897  HA  GLN B  32      -9.343  11.825 -78.068  1.00  0.00           H  
ATOM   2898 1HB  GLN B  32      -8.883  14.069 -76.066  1.00  0.00           H  
ATOM   2899 2HB  GLN B  32     -10.333  13.924 -77.049  1.00  0.00           H  
ATOM   2900 1HG  GLN B  32     -10.842  11.764 -76.026  1.00  0.00           H  
ATOM   2901 2HG  GLN B  32      -9.352  11.877 -75.048  1.00  0.00           H  
ATOM   2902 1HE2 GLN B  32     -12.673  13.246 -73.488  1.00  0.00           H  
ATOM   2903 2HE2 GLN B  32     -12.498  11.983 -74.661  1.00  0.00           H  
ATOM   2904  N   VAL B  33      -7.337  14.398 -78.585  1.00  0.00           N  
ATOM   2905  CA  VAL B  33      -6.966  15.381 -79.598  1.00  0.00           C  
ATOM   2906  C   VAL B  33      -6.539  14.676 -80.875  1.00  0.00           C  
ATOM   2907  O   VAL B  33      -6.949  15.043 -81.980  1.00  0.00           O  
ATOM   2908  CB  VAL B  33      -5.818  16.276 -79.094  1.00  0.00           C  
ATOM   2909  CG1 VAL B  33      -5.283  17.143 -80.225  1.00  0.00           C  
ATOM   2910  CG2 VAL B  33      -6.302  17.137 -77.937  1.00  0.00           C  
ATOM   2911  H   VAL B  33      -6.800  14.346 -77.731  1.00  0.00           H  
ATOM   2912  HA  VAL B  33      -7.832  16.011 -79.803  1.00  0.00           H  
ATOM   2913  HB  VAL B  33      -4.996  15.643 -78.759  1.00  0.00           H  
ATOM   2914 1HG1 VAL B  33      -4.472  17.768 -79.851  1.00  0.00           H  
ATOM   2915 2HG1 VAL B  33      -4.909  16.505 -81.026  1.00  0.00           H  
ATOM   2916 3HG1 VAL B  33      -6.083  17.777 -80.607  1.00  0.00           H  
ATOM   2917 1HG2 VAL B  33      -5.485  17.766 -77.586  1.00  0.00           H  
ATOM   2918 2HG2 VAL B  33      -7.127  17.766 -78.272  1.00  0.00           H  
ATOM   2919 3HG2 VAL B  33      -6.641  16.495 -77.124  1.00  0.00           H  
ATOM   2920  N   SER B  34      -5.713  13.641 -80.733  1.00  0.00           N  
ATOM   2921  CA  SER B  34      -5.142  12.982 -81.902  1.00  0.00           C  
ATOM   2922  C   SER B  34      -6.216  12.369 -82.778  1.00  0.00           C  
ATOM   2923  O   SER B  34      -6.053  12.300 -83.999  1.00  0.00           O  
ATOM   2924  CB  SER B  34      -4.164  11.907 -81.469  1.00  0.00           C  
ATOM   2925  OG  SER B  34      -4.832  10.835 -80.863  1.00  0.00           O  
ATOM   2926  H   SER B  34      -5.474  13.303 -79.812  1.00  0.00           H  
ATOM   2927  HA  SER B  34      -4.608  13.727 -82.493  1.00  0.00           H  
ATOM   2928 1HB  SER B  34      -3.609  11.550 -82.335  1.00  0.00           H  
ATOM   2929 2HB  SER B  34      -3.444  12.331 -80.771  1.00  0.00           H  
ATOM   2930  HG  SER B  34      -5.524  11.225 -80.323  1.00  0.00           H  
ATOM   2931  N   GLU B  35      -7.316  11.928 -82.173  1.00  0.00           N  
ATOM   2932  CA  GLU B  35      -8.314  11.182 -82.927  1.00  0.00           C  
ATOM   2933  C   GLU B  35      -9.032  12.088 -83.909  1.00  0.00           C  
ATOM   2934  O   GLU B  35      -9.569  11.626 -84.925  1.00  0.00           O  
ATOM   2935  CB  GLU B  35      -9.327  10.531 -81.983  1.00  0.00           C  
ATOM   2936  CG  GLU B  35      -8.779   9.354 -81.188  1.00  0.00           C  
ATOM   2937  CD  GLU B  35      -9.816   8.706 -80.313  1.00  0.00           C  
ATOM   2938  OE1 GLU B  35     -10.429   9.400 -79.537  1.00  0.00           O  
ATOM   2939  OE2 GLU B  35      -9.995   7.516 -80.419  1.00  0.00           O  
ATOM   2940  H   GLU B  35      -7.472  12.103 -81.190  1.00  0.00           H  
ATOM   2941  HA  GLU B  35      -7.808  10.397 -83.489  1.00  0.00           H  
ATOM   2942 1HB  GLU B  35      -9.692  11.273 -81.272  1.00  0.00           H  
ATOM   2943 2HB  GLU B  35     -10.184  10.178 -82.556  1.00  0.00           H  
ATOM   2944 1HG  GLU B  35      -8.390   8.610 -81.882  1.00  0.00           H  
ATOM   2945 2HG  GLU B  35      -7.953   9.700 -80.569  1.00  0.00           H  
ATOM   2946  N   ALA B  36      -9.030  13.390 -83.632  1.00  0.00           N  
ATOM   2947  CA  ALA B  36      -9.748  14.321 -84.493  1.00  0.00           C  
ATOM   2948  C   ALA B  36      -9.153  14.344 -85.895  1.00  0.00           C  
ATOM   2949  O   ALA B  36      -9.892  14.234 -86.880  1.00  0.00           O  
ATOM   2950  CB  ALA B  36      -9.746  15.724 -83.883  1.00  0.00           C  
ATOM   2951  H   ALA B  36      -8.534  13.747 -82.828  1.00  0.00           H  
ATOM   2952  HA  ALA B  36     -10.780  13.979 -84.574  1.00  0.00           H  
ATOM   2953 1HB  ALA B  36     -10.287  16.407 -84.538  1.00  0.00           H  
ATOM   2954 2HB  ALA B  36     -10.232  15.697 -82.907  1.00  0.00           H  
ATOM   2955 3HB  ALA B  36      -8.720  16.069 -83.767  1.00  0.00           H  
ATOM   2956  N   ILE B  37      -7.826  14.467 -86.002  1.00  0.00           N  
ATOM   2957  CA  ILE B  37      -7.196  14.490 -87.316  1.00  0.00           C  
ATOM   2958  C   ILE B  37      -7.201  13.105 -87.930  1.00  0.00           C  
ATOM   2959  O   ILE B  37      -7.392  12.946 -89.141  1.00  0.00           O  
ATOM   2960  CB  ILE B  37      -5.750  15.012 -87.232  1.00  0.00           C  
ATOM   2961  CG1 ILE B  37      -5.740  16.503 -86.882  1.00  0.00           C  
ATOM   2962  CG2 ILE B  37      -5.017  14.765 -88.541  1.00  0.00           C  
ATOM   2963  CD1 ILE B  37      -6.438  17.374 -87.900  1.00  0.00           C  
ATOM   2964  H   ILE B  37      -7.248  14.545 -85.178  1.00  0.00           H  
ATOM   2965  HA  ILE B  37      -7.764  15.161 -87.960  1.00  0.00           H  
ATOM   2966  HB  ILE B  37      -5.223  14.497 -86.429  1.00  0.00           H  
ATOM   2967 1HG1 ILE B  37      -6.222  16.653 -85.916  1.00  0.00           H  
ATOM   2968 2HG1 ILE B  37      -4.710  16.848 -86.788  1.00  0.00           H  
ATOM   2969 1HG2 ILE B  37      -3.997  15.140 -88.464  1.00  0.00           H  
ATOM   2970 2HG2 ILE B  37      -4.996  13.696 -88.749  1.00  0.00           H  
ATOM   2971 3HG2 ILE B  37      -5.534  15.282 -89.350  1.00  0.00           H  
ATOM   2972 1HD1 ILE B  37      -6.389  18.416 -87.583  1.00  0.00           H  
ATOM   2973 2HD1 ILE B  37      -5.949  17.266 -88.869  1.00  0.00           H  
ATOM   2974 3HD1 ILE B  37      -7.481  17.070 -87.985  1.00  0.00           H  
ATOM   2975  N   LEU B  38      -7.035  12.080 -87.104  1.00  0.00           N  
ATOM   2976  CA  LEU B  38      -7.013  10.719 -87.609  1.00  0.00           C  
ATOM   2977  C   LEU B  38      -8.291  10.353 -88.346  1.00  0.00           C  
ATOM   2978  O   LEU B  38      -8.245   9.613 -89.333  1.00  0.00           O  
ATOM   2979  CB  LEU B  38      -6.792   9.738 -86.451  1.00  0.00           C  
ATOM   2980  CG  LEU B  38      -5.396   9.762 -85.816  1.00  0.00           C  
ATOM   2981  CD1 LEU B  38      -5.390   8.889 -84.568  1.00  0.00           C  
ATOM   2982  CD2 LEU B  38      -4.369   9.275 -86.828  1.00  0.00           C  
ATOM   2983  H   LEU B  38      -6.923  12.239 -86.113  1.00  0.00           H  
ATOM   2984  HA  LEU B  38      -6.188  10.625 -88.314  1.00  0.00           H  
ATOM   2985 1HB  LEU B  38      -7.516   9.957 -85.667  1.00  0.00           H  
ATOM   2986 2HB  LEU B  38      -6.975   8.726 -86.812  1.00  0.00           H  
ATOM   2987  HG  LEU B  38      -5.152  10.780 -85.512  1.00  0.00           H  
ATOM   2988 1HD1 LEU B  38      -4.398   8.906 -84.117  1.00  0.00           H  
ATOM   2989 2HD1 LEU B  38      -6.119   9.271 -83.853  1.00  0.00           H  
ATOM   2990 3HD1 LEU B  38      -5.648   7.866 -84.839  1.00  0.00           H  
ATOM   2991 1HD2 LEU B  38      -3.377   9.293 -86.377  1.00  0.00           H  
ATOM   2992 2HD2 LEU B  38      -4.612   8.257 -87.132  1.00  0.00           H  
ATOM   2993 3HD2 LEU B  38      -4.383   9.927 -87.702  1.00  0.00           H  
ATOM   2994  N   LEU B  39      -9.436  10.863 -87.901  1.00  0.00           N  
ATOM   2995  CA  LEU B  39     -10.653  10.618 -88.660  1.00  0.00           C  
ATOM   2996  C   LEU B  39     -10.762  11.533 -89.877  1.00  0.00           C  
ATOM   2997  O   LEU B  39     -11.272  11.119 -90.923  1.00  0.00           O  
ATOM   2998  CB  LEU B  39     -11.878  10.812 -87.758  1.00  0.00           C  
ATOM   2999  CG  LEU B  39     -12.032   9.798 -86.618  1.00  0.00           C  
ATOM   3000  CD1 LEU B  39     -13.227  10.181 -85.755  1.00  0.00           C  
ATOM   3001  CD2 LEU B  39     -12.202   8.402 -87.199  1.00  0.00           C  
ATOM   3002  H   LEU B  39      -9.486  11.414 -87.056  1.00  0.00           H  
ATOM   3003  HA  LEU B  39     -10.636   9.589 -89.017  1.00  0.00           H  
ATOM   3004 1HB  LEU B  39     -11.829  11.805 -87.314  1.00  0.00           H  
ATOM   3005 2HB  LEU B  39     -12.775  10.757 -88.375  1.00  0.00           H  
ATOM   3006  HG  LEU B  39     -11.144   9.823 -85.986  1.00  0.00           H  
ATOM   3007 1HD1 LEU B  39     -13.337   9.460 -84.945  1.00  0.00           H  
ATOM   3008 2HD1 LEU B  39     -13.070  11.175 -85.337  1.00  0.00           H  
ATOM   3009 3HD1 LEU B  39     -14.130  10.181 -86.364  1.00  0.00           H  
ATOM   3010 1HD2 LEU B  39     -12.311   7.681 -86.388  1.00  0.00           H  
ATOM   3011 2HD2 LEU B  39     -13.091   8.376 -87.829  1.00  0.00           H  
ATOM   3012 3HD2 LEU B  39     -11.326   8.147 -87.796  1.00  0.00           H  
ATOM   3013  N   ALA B  40     -10.288  12.779 -89.762  1.00  0.00           N  
ATOM   3014  CA  ALA B  40     -10.329  13.732 -90.872  1.00  0.00           C  
ATOM   3015  C   ALA B  40      -9.193  13.539 -91.859  1.00  0.00           C  
ATOM   3016  O   ALA B  40      -9.206  14.154 -92.933  1.00  0.00           O  
ATOM   3017  CB  ALA B  40     -10.290  15.161 -90.333  1.00  0.00           C  
ATOM   3018  H   ALA B  40      -9.889  13.068 -88.880  1.00  0.00           H  
ATOM   3019  HA  ALA B  40     -11.256  13.572 -91.422  1.00  0.00           H  
ATOM   3020 1HB  ALA B  40     -10.321  15.865 -91.166  1.00  0.00           H  
ATOM   3021 2HB  ALA B  40     -11.150  15.329 -89.685  1.00  0.00           H  
ATOM   3022 3HB  ALA B  40      -9.373  15.311 -89.766  1.00  0.00           H  
ATOM   3023  N   GLU B  41      -8.210  12.724 -91.496  1.00  0.00           N  
ATOM   3024  CA  GLU B  41      -7.009  12.538 -92.294  1.00  0.00           C  
ATOM   3025  C   GLU B  41      -7.342  12.085 -93.710  1.00  0.00           C  
ATOM   3026  O   GLU B  41      -6.622  12.405 -94.659  1.00  0.00           O  
ATOM   3027  CB  GLU B  41      -6.084  11.518 -91.626  1.00  0.00           C  
ATOM   3028  CG  GLU B  41      -4.763  11.298 -92.351  1.00  0.00           C  
ATOM   3029  CD  GLU B  41      -3.828  10.392 -91.600  1.00  0.00           C  
ATOM   3030  OE1 GLU B  41      -4.123  10.065 -90.476  1.00  0.00           O  
ATOM   3031  OE2 GLU B  41      -2.817  10.026 -92.152  1.00  0.00           O  
ATOM   3032  H   GLU B  41      -8.308  12.216 -90.629  1.00  0.00           H  
ATOM   3033  HA  GLU B  41      -6.487  13.493 -92.362  1.00  0.00           H  
ATOM   3034 1HB  GLU B  41      -5.858  11.842 -90.610  1.00  0.00           H  
ATOM   3035 2HB  GLU B  41      -6.592  10.556 -91.558  1.00  0.00           H  
ATOM   3036 1HG  GLU B  41      -4.966  10.863 -93.329  1.00  0.00           H  
ATOM   3037 2HG  GLU B  41      -4.281  12.263 -92.506  1.00  0.00           H  
ATOM   3038  N   GLY B  42      -8.442  11.348 -93.873  1.00  0.00           N  
ATOM   3039  CA  GLY B  42      -8.732  10.755 -95.164  1.00  0.00           C  
ATOM   3040  C   GLY B  42      -8.855  11.776 -96.275  1.00  0.00           C  
ATOM   3041  O   GLY B  42      -8.693  11.441 -97.449  1.00  0.00           O  
ATOM   3042  H   GLY B  42      -9.081  11.194 -93.106  1.00  0.00           H  
ATOM   3043 1HA  GLY B  42      -7.944  10.048 -95.426  1.00  0.00           H  
ATOM   3044 2HA  GLY B  42      -9.662  10.191 -95.105  1.00  0.00           H  
ATOM   3045  N   GLN B  43      -9.126  13.034 -95.921  1.00  0.00           N  
ATOM   3046  CA  GLN B  43      -9.343  14.055 -96.938  1.00  0.00           C  
ATOM   3047  C   GLN B  43      -8.069  14.327 -97.723  1.00  0.00           C  
ATOM   3048  O   GLN B  43      -8.122  14.860 -98.838  1.00  0.00           O  
ATOM   3049  CB  GLN B  43      -9.849  15.351 -96.298  1.00  0.00           C  
ATOM   3050  CG  GLN B  43     -11.257  15.259 -95.736  1.00  0.00           C  
ATOM   3051  CD  GLN B  43     -11.801  16.611 -95.314  1.00  0.00           C  
ATOM   3052  OE1 GLN B  43     -11.047  17.499 -94.907  1.00  0.00           O  
ATOM   3053  NE2 GLN B  43     -13.116  16.775 -95.409  1.00  0.00           N  
ATOM   3054  H   GLN B  43      -9.183  13.290 -94.946  1.00  0.00           H  
ATOM   3055  HA  GLN B  43     -10.099  13.694 -97.635  1.00  0.00           H  
ATOM   3056 1HB  GLN B  43      -9.181  15.640 -95.486  1.00  0.00           H  
ATOM   3057 2HB  GLN B  43      -9.832  16.152 -97.036  1.00  0.00           H  
ATOM   3058 1HG  GLN B  43     -11.916  14.849 -96.501  1.00  0.00           H  
ATOM   3059 2HG  GLN B  43     -11.248  14.607 -94.863  1.00  0.00           H  
ATOM   3060 1HE2 GLN B  43     -13.532  17.646 -95.145  1.00  0.00           H  
ATOM   3061 2HE2 GLN B  43     -13.690  16.028 -95.744  1.00  0.00           H  
ATOM   3062  N   LYS B  44      -6.921  13.951 -97.160  1.00  0.00           N  
ATOM   3063  CA  LYS B  44      -5.618  14.211 -97.756  1.00  0.00           C  
ATOM   3064  C   LYS B  44      -5.470  13.608 -99.141  1.00  0.00           C  
ATOM   3065  O   LYS B  44      -4.602  14.042 -99.910  1.00  0.00           O  
ATOM   3066  CB  LYS B  44      -4.510  13.682 -96.845  1.00  0.00           C  
ATOM   3067  CG  LYS B  44      -4.395  12.163 -96.810  1.00  0.00           C  
ATOM   3068  CD  LYS B  44      -3.328  11.712 -95.824  1.00  0.00           C  
ATOM   3069  CE  LYS B  44      -3.155  10.200 -95.848  1.00  0.00           C  
ATOM   3070  NZ  LYS B  44      -2.131   9.742 -94.870  1.00  0.00           N  
ATOM   3071  H   LYS B  44      -6.969  13.464 -96.276  1.00  0.00           H  
ATOM   3072  HA  LYS B  44      -5.497  15.289 -97.869  1.00  0.00           H  
ATOM   3073 1HB  LYS B  44      -3.549  14.082 -97.170  1.00  0.00           H  
ATOM   3074 2HB  LYS B  44      -4.680  14.028 -95.825  1.00  0.00           H  
ATOM   3075 1HG  LYS B  44      -5.354  11.733 -96.517  1.00  0.00           H  
ATOM   3076 2HG  LYS B  44      -4.140  11.795 -97.803  1.00  0.00           H  
ATOM   3077 1HD  LYS B  44      -2.376  12.182 -96.078  1.00  0.00           H  
ATOM   3078 2HD  LYS B  44      -3.608  12.020 -94.817  1.00  0.00           H  
ATOM   3079 1HE  LYS B  44      -4.105   9.723 -95.612  1.00  0.00           H  
ATOM   3080 2HE  LYS B  44      -2.852   9.884 -96.846  1.00  0.00           H  
ATOM   3081 1HZ  LYS B  44      -2.047   8.736 -94.916  1.00  0.00           H  
ATOM   3082 2HZ  LYS B  44      -1.241  10.165 -95.090  1.00  0.00           H  
ATOM   3083 3HZ  LYS B  44      -2.411  10.013 -93.938  1.00  0.00           H  
ATOM   3084  N   SER B  45      -6.288  12.616 -99.474  1.00  0.00           N  
ATOM   3085  CA  SER B  45      -6.239  12.008-100.795  1.00  0.00           C  
ATOM   3086  C   SER B  45      -6.681  12.973-101.881  1.00  0.00           C  
ATOM   3087  O   SER B  45      -5.971  13.166-102.869  1.00  0.00           O  
ATOM   3088  CB  SER B  45      -7.113  10.770-100.826  1.00  0.00           C  
ATOM   3089  OG  SER B  45      -7.082  10.166-102.091  1.00  0.00           O  
ATOM   3090  H   SER B  45      -6.959  12.275 -98.800  1.00  0.00           H  
ATOM   3091  HA  SER B  45      -5.208  11.719-101.004  1.00  0.00           H  
ATOM   3092 1HB  SER B  45      -6.768  10.062-100.074  1.00  0.00           H  
ATOM   3093 2HB  SER B  45      -8.138  11.041-100.575  1.00  0.00           H  
ATOM   3094  HG  SER B  45      -7.031  10.884-102.726  1.00  0.00           H  
ATOM   3095  N   ALA B  46      -7.845  13.593-101.697  1.00  0.00           N  
ATOM   3096  CA  ALA B  46      -8.343  14.520-102.705  1.00  0.00           C  
ATOM   3097  C   ALA B  46      -7.553  15.814-102.669  1.00  0.00           C  
ATOM   3098  O   ALA B  46      -7.336  16.449-103.704  1.00  0.00           O  
ATOM   3099  CB  ALA B  46      -9.831  14.783-102.499  1.00  0.00           C  
ATOM   3100  H   ALA B  46      -8.394  13.432-100.864  1.00  0.00           H  
ATOM   3101  HA  ALA B  46      -8.205  14.060-103.684  1.00  0.00           H  
ATOM   3102 1HB  ALA B  46     -10.187  15.477-103.261  1.00  0.00           H  
ATOM   3103 2HB  ALA B  46     -10.381  13.846-102.578  1.00  0.00           H  
ATOM   3104 3HB  ALA B  46      -9.991  15.215-101.513  1.00  0.00           H  
ATOM   3105  N   VAL B  47      -7.117  16.206-101.475  1.00  0.00           N  
ATOM   3106  CA  VAL B  47      -6.281  17.388-101.326  1.00  0.00           C  
ATOM   3107  C   VAL B  47      -4.974  17.204-102.083  1.00  0.00           C  
ATOM   3108  O   VAL B  47      -4.523  18.096-102.812  1.00  0.00           O  
ATOM   3109  CB  VAL B  47      -5.984  17.657 -99.839  1.00  0.00           C  
ATOM   3110  CG1 VAL B  47      -4.928  18.742 -99.694  1.00  0.00           C  
ATOM   3111  CG2 VAL B  47      -7.265  18.051 -99.118  1.00  0.00           C  
ATOM   3112  H   VAL B  47      -7.368  15.674-100.654  1.00  0.00           H  
ATOM   3113  HA  VAL B  47      -6.818  18.245-101.734  1.00  0.00           H  
ATOM   3114  HB  VAL B  47      -5.578  16.751 -99.389  1.00  0.00           H  
ATOM   3115 1HG1 VAL B  47      -4.730  18.919 -98.637  1.00  0.00           H  
ATOM   3116 2HG1 VAL B  47      -4.009  18.423-100.186  1.00  0.00           H  
ATOM   3117 3HG1 VAL B  47      -5.286  19.662-100.155  1.00  0.00           H  
ATOM   3118 1HG2 VAL B  47      -7.048  18.240 -98.067  1.00  0.00           H  
ATOM   3119 2HG2 VAL B  47      -7.674  18.954 -99.572  1.00  0.00           H  
ATOM   3120 3HG2 VAL B  47      -7.992  17.243 -99.199  1.00  0.00           H  
ATOM   3121  N   THR B  48      -4.365  16.032-101.936  1.00  0.00           N  
ATOM   3122  CA  THR B  48      -3.131  15.759-102.657  1.00  0.00           C  
ATOM   3123  C   THR B  48      -3.396  15.698-104.149  1.00  0.00           C  
ATOM   3124  O   THR B  48      -2.625  16.228-104.948  1.00  0.00           O  
ATOM   3125  CB  THR B  48      -2.484  14.443-102.187  1.00  0.00           C  
ATOM   3126  OG1 THR B  48      -2.161  14.537-100.793  1.00  0.00           O  
ATOM   3127  CG2 THR B  48      -1.217  14.158-102.979  1.00  0.00           C  
ATOM   3128  H   THR B  48      -4.747  15.321-101.329  1.00  0.00           H  
ATOM   3129  HA  THR B  48      -2.430  16.571-102.461  1.00  0.00           H  
ATOM   3130  HB  THR B  48      -3.187  13.622-102.328  1.00  0.00           H  
ATOM   3131  HG1 THR B  48      -2.952  14.385-100.271  1.00  0.00           H  
ATOM   3132 1HG2 THR B  48      -0.775  13.224-102.633  1.00  0.00           H  
ATOM   3133 2HG2 THR B  48      -1.462  14.075-104.038  1.00  0.00           H  
ATOM   3134 3HG2 THR B  48      -0.507  14.971-102.834  1.00  0.00           H  
ATOM   3135  N   GLU B  49      -4.509  15.077-104.539  1.00  0.00           N  
ATOM   3136  CA  GLU B  49      -4.885  14.967-105.946  1.00  0.00           C  
ATOM   3137  C   GLU B  49      -4.894  16.321-106.621  1.00  0.00           C  
ATOM   3138  O   GLU B  49      -4.256  16.520-107.658  1.00  0.00           O  
ATOM   3139  CB  GLU B  49      -6.262  14.314-106.084  1.00  0.00           C  
ATOM   3140  CG  GLU B  49      -6.743  14.158-107.519  1.00  0.00           C  
ATOM   3141  CD  GLU B  49      -8.121  13.565-107.613  1.00  0.00           C  
ATOM   3142  OE1 GLU B  49      -8.686  13.256-106.591  1.00  0.00           O  
ATOM   3143  OE2 GLU B  49      -8.610  13.420-108.709  1.00  0.00           O  
ATOM   3144  H   GLU B  49      -5.109  14.670-103.836  1.00  0.00           H  
ATOM   3145  HA  GLU B  49      -4.151  14.340-106.452  1.00  0.00           H  
ATOM   3146 1HB  GLU B  49      -6.243  13.324-105.628  1.00  0.00           H  
ATOM   3147 2HB  GLU B  49      -7.002  14.908-105.546  1.00  0.00           H  
ATOM   3148 1HG  GLU B  49      -6.748  15.137-107.998  1.00  0.00           H  
ATOM   3149 2HG  GLU B  49      -6.042  13.523-108.059  1.00  0.00           H  
ATOM   3150  N   TYR B  50      -5.642  17.262-106.049  1.00  0.00           N  
ATOM   3151  CA  TYR B  50      -5.697  18.602-106.606  1.00  0.00           C  
ATOM   3152  C   TYR B  50      -4.309  19.214-106.612  1.00  0.00           C  
ATOM   3153  O   TYR B  50      -3.868  19.792-107.610  1.00  0.00           O  
ATOM   3154  CB  TYR B  50      -6.671  19.480-105.817  1.00  0.00           C  
ATOM   3155  CG  TYR B  50      -6.799  20.887-106.357  1.00  0.00           C  
ATOM   3156  CD1 TYR B  50      -7.768  21.180-107.306  1.00  0.00           C  
ATOM   3157  CD2 TYR B  50      -5.948  21.884-105.904  1.00  0.00           C  
ATOM   3158  CE1 TYR B  50      -7.885  22.465-107.800  1.00  0.00           C  
ATOM   3159  CE2 TYR B  50      -6.065  23.169-106.398  1.00  0.00           C  
ATOM   3160  CZ  TYR B  50      -7.028  23.460-107.341  1.00  0.00           C  
ATOM   3161  OH  TYR B  50      -7.145  24.740-107.833  1.00  0.00           O  
ATOM   3162  H   TYR B  50      -6.178  17.052-105.220  1.00  0.00           H  
ATOM   3163  HA  TYR B  50      -6.050  18.534-107.635  1.00  0.00           H  
ATOM   3164 1HB  TYR B  50      -7.661  19.022-105.823  1.00  0.00           H  
ATOM   3165 2HB  TYR B  50      -6.346  19.542-104.779  1.00  0.00           H  
ATOM   3166  HD1 TYR B  50      -8.437  20.397-107.662  1.00  0.00           H  
ATOM   3167  HD2 TYR B  50      -5.186  21.653-105.160  1.00  0.00           H  
ATOM   3168  HE1 TYR B  50      -8.645  22.696-108.545  1.00  0.00           H  
ATOM   3169  HE2 TYR B  50      -5.395  23.952-106.042  1.00  0.00           H  
ATOM   3170  HH  TYR B  50      -6.278  25.153-107.855  1.00  0.00           H  
ATOM   3171  N   TYR B  51      -3.588  19.069-105.501  1.00  0.00           N  
ATOM   3172  CA  TYR B  51      -2.269  19.673-105.407  1.00  0.00           C  
ATOM   3173  C   TYR B  51      -1.403  19.238-106.575  1.00  0.00           C  
ATOM   3174  O   TYR B  51      -0.823  20.071-107.278  1.00  0.00           O  
ATOM   3175  CB  TYR B  51      -1.600  19.308-104.080  1.00  0.00           C  
ATOM   3176  CG  TYR B  51      -0.126  19.640-104.028  1.00  0.00           C  
ATOM   3177  CD1 TYR B  51       0.286  20.964-103.994  1.00  0.00           C  
ATOM   3178  CD2 TYR B  51       0.815  18.621-104.014  1.00  0.00           C  
ATOM   3179  CE1 TYR B  51       1.633  21.267-103.946  1.00  0.00           C  
ATOM   3180  CE2 TYR B  51       2.162  18.924-103.967  1.00  0.00           C  
ATOM   3181  CZ  TYR B  51       2.571  20.241-103.933  1.00  0.00           C  
ATOM   3182  OH  TYR B  51       3.913  20.543-103.886  1.00  0.00           O  
ATOM   3183  H   TYR B  51      -3.946  18.543-104.716  1.00  0.00           H  
ATOM   3184  HA  TYR B  51      -2.381  20.757-105.452  1.00  0.00           H  
ATOM   3185 1HB  TYR B  51      -2.097  19.835-103.264  1.00  0.00           H  
ATOM   3186 2HB  TYR B  51      -1.715  18.240-103.896  1.00  0.00           H  
ATOM   3187  HD1 TYR B  51      -0.453  21.765-104.004  1.00  0.00           H  
ATOM   3188  HD2 TYR B  51       0.491  17.580-104.042  1.00  0.00           H  
ATOM   3189  HE1 TYR B  51       1.957  22.308-103.920  1.00  0.00           H  
ATOM   3190  HE2 TYR B  51       2.901  18.123-103.957  1.00  0.00           H  
ATOM   3191  HH  TYR B  51       4.024  21.496-103.852  1.00  0.00           H  
ATOM   3192  N   LEU B  52      -1.324  17.938-106.802  1.00  0.00           N  
ATOM   3193  CA  LEU B  52      -0.406  17.400-107.787  1.00  0.00           C  
ATOM   3194  C   LEU B  52      -0.878  17.744-109.181  1.00  0.00           C  
ATOM   3195  O   LEU B  52      -0.075  18.078-110.055  1.00  0.00           O  
ATOM   3196  CB  LEU B  52      -0.287  15.878-107.636  1.00  0.00           C  
ATOM   3197  CG  LEU B  52       0.420  15.389-106.366  1.00  0.00           C  
ATOM   3198  CD1 LEU B  52       0.342  13.870-106.293  1.00  0.00           C  
ATOM   3199  CD2 LEU B  52       1.866  15.862-106.375  1.00  0.00           C  
ATOM   3200  H   LEU B  52      -1.913  17.305-106.281  1.00  0.00           H  
ATOM   3201  HA  LEU B  52       0.575  17.844-107.624  1.00  0.00           H  
ATOM   3202 1HB  LEU B  52      -1.287  15.449-107.645  1.00  0.00           H  
ATOM   3203 2HB  LEU B  52       0.262  15.486-108.493  1.00  0.00           H  
ATOM   3204  HG  LEU B  52      -0.087  15.791-105.489  1.00  0.00           H  
ATOM   3205 1HD1 LEU B  52       0.844  13.523-105.390  1.00  0.00           H  
ATOM   3206 2HD1 LEU B  52      -0.703  13.560-106.268  1.00  0.00           H  
ATOM   3207 3HD1 LEU B  52       0.828  13.439-107.168  1.00  0.00           H  
ATOM   3208 1HD2 LEU B  52       2.369  15.515-105.472  1.00  0.00           H  
ATOM   3209 2HD2 LEU B  52       2.375  15.459-107.251  1.00  0.00           H  
ATOM   3210 3HD2 LEU B  52       1.893  16.951-106.410  1.00  0.00           H  
ATOM   3211  N   ASN B  53      -2.187  17.637-109.392  1.00  0.00           N  
ATOM   3212  CA  ASN B  53      -2.739  17.792-110.726  1.00  0.00           C  
ATOM   3213  C   ASN B  53      -2.635  19.239-111.188  1.00  0.00           C  
ATOM   3214  O   ASN B  53      -2.367  19.516-112.356  1.00  0.00           O  
ATOM   3215  CB  ASN B  53      -4.179  17.315-110.767  1.00  0.00           C  
ATOM   3216  CG  ASN B  53      -4.292  15.816-110.752  1.00  0.00           C  
ATOM   3217  OD1 ASN B  53      -3.328  15.105-111.060  1.00  0.00           O  
ATOM   3218  ND2 ASN B  53      -5.451  15.321-110.400  1.00  0.00           N  
ATOM   3219  H   ASN B  53      -2.811  17.447-108.621  1.00  0.00           H  
ATOM   3220  HA  ASN B  53      -2.152  17.184-111.416  1.00  0.00           H  
ATOM   3221 1HB  ASN B  53      -4.721  17.717-109.910  1.00  0.00           H  
ATOM   3222 2HB  ASN B  53      -4.662  17.695-111.668  1.00  0.00           H  
ATOM   3223 1HD2 ASN B  53      -5.584  14.330-110.371  1.00  0.00           H  
ATOM   3224 2HD2 ASN B  53      -6.203  15.933-110.158  1.00  0.00           H  
ATOM   3225  N   HIS B  54      -2.789  20.174-110.255  1.00  0.00           N  
ATOM   3226  CA  HIS B  54      -2.825  21.590-110.597  1.00  0.00           C  
ATOM   3227  C   HIS B  54      -1.550  22.309-110.189  1.00  0.00           C  
ATOM   3228  O   HIS B  54      -1.316  23.452-110.603  1.00  0.00           O  
ATOM   3229  CB  HIS B  54      -4.029  22.269-109.937  1.00  0.00           C  
ATOM   3230  CG  HIS B  54      -5.350  21.776-110.440  1.00  0.00           C  
ATOM   3231  ND1 HIS B  54      -5.883  20.561-110.063  1.00  0.00           N  
ATOM   3232  CD2 HIS B  54      -6.244  22.331-111.291  1.00  0.00           C  
ATOM   3233  CE1 HIS B  54      -7.050  20.392-110.660  1.00  0.00           C  
ATOM   3234  NE2 HIS B  54      -7.291  21.451-111.411  1.00  0.00           N  
ATOM   3235  H   HIS B  54      -2.882  19.900-109.288  1.00  0.00           H  
ATOM   3236  HA  HIS B  54      -2.923  21.700-111.677  1.00  0.00           H  
ATOM   3237 1HB  HIS B  54      -3.992  22.107-108.859  1.00  0.00           H  
ATOM   3238 2HB  HIS B  54      -3.979  23.344-110.108  1.00  0.00           H  
ATOM   3239  HD2 HIS B  54      -6.150  23.297-111.789  1.00  0.00           H  
ATOM   3240  HE1 HIS B  54      -7.702  19.525-110.551  1.00  0.00           H  
ATOM   3241  HE2 HIS B  54      -8.111  21.596-111.982  1.00  0.00           H  
ATOM   3242  N   GLY B  55      -0.720  21.659-109.380  1.00  0.00           N  
ATOM   3243  CA  GLY B  55       0.525  22.238-108.943  1.00  0.00           C  
ATOM   3244  C   GLY B  55       0.342  23.325-107.908  1.00  0.00           C  
ATOM   3245  O   GLY B  55       1.166  24.249-107.842  1.00  0.00           O  
ATOM   3246  H   GLY B  55      -0.970  20.733-109.064  1.00  0.00           H  
ATOM   3247 1HA  GLY B  55       1.162  21.459-108.523  1.00  0.00           H  
ATOM   3248 2HA  GLY B  55       1.053  22.657-109.799  1.00  0.00           H  
ATOM   3249  N   GLU B  56      -0.721  23.248-107.111  1.00  0.00           N  
ATOM   3250  CA  GLU B  56      -1.081  24.274-106.145  1.00  0.00           C  
ATOM   3251  C   GLU B  56      -2.020  23.677-105.113  1.00  0.00           C  
ATOM   3252  O   GLU B  56      -2.869  22.850-105.441  1.00  0.00           O  
ATOM   3253  CB  GLU B  56      -1.739  25.471-106.835  1.00  0.00           C  
ATOM   3254  CG  GLU B  56      -3.101  25.173-107.446  1.00  0.00           C  
ATOM   3255  CD  GLU B  56      -3.762  26.394-108.023  1.00  0.00           C  
ATOM   3256  OE1 GLU B  56      -3.087  27.375-108.220  1.00  0.00           O  
ATOM   3257  OE2 GLU B  56      -4.945  26.345-108.266  1.00  0.00           O  
ATOM   3258  H   GLU B  56      -1.301  22.425-107.193  1.00  0.00           H  
ATOM   3259  HA  GLU B  56      -0.171  24.618-105.651  1.00  0.00           H  
ATOM   3260 1HB  GLU B  56      -1.864  26.281-106.116  1.00  0.00           H  
ATOM   3261 2HB  GLU B  56      -1.088  25.836-107.629  1.00  0.00           H  
ATOM   3262 1HG  GLU B  56      -2.979  24.433-108.236  1.00  0.00           H  
ATOM   3263 2HG  GLU B  56      -3.745  24.744-106.680  1.00  0.00           H  
ATOM   3264  N   TRP B  57      -1.887  24.116-103.871  1.00  0.00           N  
ATOM   3265  CA  TRP B  57      -2.716  23.541-102.841  1.00  0.00           C  
ATOM   3266  C   TRP B  57      -4.139  24.041-103.003  1.00  0.00           C  
ATOM   3267  O   TRP B  57      -4.362  25.168-103.448  1.00  0.00           O  
ATOM   3268  CB  TRP B  57      -2.184  23.900-101.453  1.00  0.00           C  
ATOM   3269  CG  TRP B  57      -0.874  23.248-101.127  1.00  0.00           C  
ATOM   3270  CD1 TRP B  57       0.358  23.827-101.174  1.00  0.00           C  
ATOM   3271  CD2 TRP B  57      -0.659  21.881-100.699  1.00  0.00           C  
ATOM   3272  NE1 TRP B  57       1.322  22.920-100.808  1.00  0.00           N  
ATOM   3273  CE2 TRP B  57       0.717  21.724-100.513  1.00  0.00           C  
ATOM   3274  CE3 TRP B  57      -1.511  20.796-100.462  1.00  0.00           C  
ATOM   3275  CZ2 TRP B  57       1.269  20.522-100.101  1.00  0.00           C  
ATOM   3276  CZ3 TRP B  57      -0.958  19.590-100.047  1.00  0.00           C  
ATOM   3277  CH2 TRP B  57       0.396  19.458 -99.871  1.00  0.00           C  
ATOM   3278  H   TRP B  57      -1.225  24.837-103.623  1.00  0.00           H  
ATOM   3279  HA  TRP B  57      -2.699  22.456-102.949  1.00  0.00           H  
ATOM   3280 1HB  TRP B  57      -2.057  24.980-101.380  1.00  0.00           H  
ATOM   3281 2HB  TRP B  57      -2.911  23.604-100.697  1.00  0.00           H  
ATOM   3282  HD1 TRP B  57       0.551  24.860-101.461  1.00  0.00           H  
ATOM   3283  HE1 TRP B  57       2.314  23.101-100.764  1.00  0.00           H  
ATOM   3284  HE3 TRP B  57      -2.588  20.896-100.598  1.00  0.00           H  
ATOM   3285  HZ2 TRP B  57       2.342  20.396 -99.955  1.00  0.00           H  
ATOM   3286  HZ3 TRP B  57      -1.628  18.750 -99.866  1.00  0.00           H  
ATOM   3287  HH2 TRP B  57       0.797  18.498 -99.545  1.00  0.00           H  
ATOM   3288  N   PRO B  58      -5.120  23.215-102.697  1.00  0.00           N  
ATOM   3289  CA  PRO B  58      -6.503  23.640-102.876  1.00  0.00           C  
ATOM   3290  C   PRO B  58      -6.831  24.723-101.873  1.00  0.00           C  
ATOM   3291  O   PRO B  58      -6.498  24.611-100.694  1.00  0.00           O  
ATOM   3292  CB  PRO B  58      -7.308  22.362-102.620  1.00  0.00           C  
ATOM   3293  CG  PRO B  58      -6.430  21.547-101.733  1.00  0.00           C  
ATOM   3294  CD  PRO B  58      -5.036  21.826-102.230  1.00  0.00           C  
ATOM   3295  HA  PRO B  58      -6.643  23.987-103.911  1.00  0.00           H  
ATOM   3296 1HB  PRO B  58      -8.272  22.612-102.153  1.00  0.00           H  
ATOM   3297 2HB  PRO B  58      -7.534  21.861-103.573  1.00  0.00           H  
ATOM   3298 1HG  PRO B  58      -6.572  21.842-100.683  1.00  0.00           H  
ATOM   3299 2HG  PRO B  58      -6.700  20.483-101.804  1.00  0.00           H  
ATOM   3300 1HD  PRO B  58      -4.323  21.723-101.399  1.00  0.00           H  
ATOM   3301 2HD  PRO B  58      -4.789  21.126-103.042  1.00  0.00           H  
ATOM   3302  N   GLY B  59      -7.503  25.768-102.356  1.00  0.00           N  
ATOM   3303  CA  GLY B  59      -7.780  26.905-101.507  1.00  0.00           C  
ATOM   3304  C   GLY B  59      -8.835  26.599-100.473  1.00  0.00           C  
ATOM   3305  O   GLY B  59      -8.699  26.971 -99.307  1.00  0.00           O  
ATOM   3306  H   GLY B  59      -7.825  25.779-103.313  1.00  0.00           H  
ATOM   3307 1HA  GLY B  59      -6.864  27.215-101.003  1.00  0.00           H  
ATOM   3308 2HA  GLY B  59      -8.110  27.744-102.118  1.00  0.00           H  
ATOM   3309  N   ASP B  60      -9.863  25.870-100.863  1.00  0.00           N  
ATOM   3310  CA  ASP B  60     -10.960  25.563 -99.966  1.00  0.00           C  
ATOM   3311  C   ASP B  60     -11.467  24.164-100.283  1.00  0.00           C  
ATOM   3312  O   ASP B  60     -10.845  23.405-101.038  1.00  0.00           O  
ATOM   3313  CB  ASP B  60     -12.090  26.586-100.104  1.00  0.00           C  
ATOM   3314  CG  ASP B  60     -12.734  26.575-101.483  1.00  0.00           C  
ATOM   3315  OD1 ASP B  60     -12.696  25.553-102.127  1.00  0.00           O  
ATOM   3316  OD2 ASP B  60     -13.259  27.588-101.880  1.00  0.00           O  
ATOM   3317  H   ASP B  60      -9.888  25.516-101.808  1.00  0.00           H  
ATOM   3318  HA  ASP B  60     -10.589  25.598 -98.941  1.00  0.00           H  
ATOM   3319 1HB  ASP B  60     -12.858  26.382 -99.358  1.00  0.00           H  
ATOM   3320 2HB  ASP B  60     -11.701  27.586 -99.909  1.00  0.00           H  
ATOM   3321  N   ASN B  61     -12.612  23.851 -99.682  1.00  0.00           N  
ATOM   3322  CA  ASN B  61     -13.184  22.517 -99.712  1.00  0.00           C  
ATOM   3323  C   ASN B  61     -13.725  22.158-101.089  1.00  0.00           C  
ATOM   3324  O   ASN B  61     -13.748  20.984-101.473  1.00  0.00           O  
ATOM   3325  CB  ASN B  61     -14.274  22.388 -98.664  1.00  0.00           C  
ATOM   3326  CG  ASN B  61     -13.744  22.512 -97.262  1.00  0.00           C  
ATOM   3327  OD1 ASN B  61     -12.661  22.006 -96.947  1.00  0.00           O  
ATOM   3328  ND2 ASN B  61     -14.488  23.176 -96.414  1.00  0.00           N  
ATOM   3329  H   ASN B  61     -13.097  24.583 -99.183  1.00  0.00           H  
ATOM   3330  HA  ASN B  61     -12.395  21.797 -99.489  1.00  0.00           H  
ATOM   3331 1HB  ASN B  61     -15.027  23.160 -98.825  1.00  0.00           H  
ATOM   3332 2HB  ASN B  61     -14.767  21.422 -98.769  1.00  0.00           H  
ATOM   3333 1HD2 ASN B  61     -14.186  23.291 -95.467  1.00  0.00           H  
ATOM   3334 2HD2 ASN B  61     -15.357  23.568 -96.712  1.00  0.00           H  
ATOM   3335  N   SER B  62     -14.173  23.161-101.844  1.00  0.00           N  
ATOM   3336  CA  SER B  62     -14.677  22.925-103.192  1.00  0.00           C  
ATOM   3337  C   SER B  62     -13.549  22.778-104.203  1.00  0.00           C  
ATOM   3338  O   SER B  62     -13.732  22.148-105.252  1.00  0.00           O  
ATOM   3339  CB  SER B  62     -15.591  24.060-103.609  1.00  0.00           C  
ATOM   3340  OG  SER B  62     -14.866  25.245-103.798  1.00  0.00           O  
ATOM   3341  H   SER B  62     -14.165  24.103-101.480  1.00  0.00           H  
ATOM   3342  HA  SER B  62     -15.247  21.995-103.190  1.00  0.00           H  
ATOM   3343 1HB  SER B  62     -16.104  23.793-104.533  1.00  0.00           H  
ATOM   3344 2HB  SER B  62     -16.352  24.214-102.845  1.00  0.00           H  
ATOM   3345  HG  SER B  62     -14.131  25.206-103.181  1.00  0.00           H  
ATOM   3346  N   SER B  63     -12.397  23.388-103.936  1.00  0.00           N  
ATOM   3347  CA  SER B  63     -11.236  23.180-104.792  1.00  0.00           C  
ATOM   3348  C   SER B  63     -10.547  21.874-104.434  1.00  0.00           C  
ATOM   3349  O   SER B  63      -9.990  21.190-105.295  1.00  0.00           O  
ATOM   3350  CB  SER B  63     -10.264  24.335-104.656  1.00  0.00           C  
ATOM   3351  OG  SER B  63      -9.713  24.379-103.368  1.00  0.00           O  
ATOM   3352  H   SER B  63     -12.316  24.000-103.137  1.00  0.00           H  
ATOM   3353  HA  SER B  63     -11.575  23.129-105.828  1.00  0.00           H  
ATOM   3354 1HB  SER B  63      -9.467  24.228-105.391  1.00  0.00           H  
ATOM   3355 2HB  SER B  63     -10.779  25.271-104.866  1.00  0.00           H  
ATOM   3356  HG  SER B  63     -10.357  23.960-102.791  1.00  0.00           H  
ATOM   3357  N   ALA B  64     -10.619  21.490-103.159  1.00  0.00           N  
ATOM   3358  CA  ALA B  64     -10.064  20.209-102.749  1.00  0.00           C  
ATOM   3359  C   ALA B  64     -10.962  19.062-103.165  1.00  0.00           C  
ATOM   3360  O   ALA B  64     -10.477  17.964-103.460  1.00  0.00           O  
ATOM   3361  CB  ALA B  64      -9.858  20.180-101.235  1.00  0.00           C  
ATOM   3362  H   ALA B  64     -11.057  22.081-102.467  1.00  0.00           H  
ATOM   3363  HA  ALA B  64      -9.104  20.079-103.249  1.00  0.00           H  
ATOM   3364 1HB  ALA B  64      -9.443  19.215-100.942  1.00  0.00           H  
ATOM   3365 2HB  ALA B  64      -9.170  20.974-100.946  1.00  0.00           H  
ATOM   3366 3HB  ALA B  64     -10.814  20.329-100.735  1.00  0.00           H  
ATOM   3367  N   GLY B  65     -12.267  19.298-103.207  1.00  0.00           N  
ATOM   3368  CA  GLY B  65     -13.210  18.240-103.482  1.00  0.00           C  
ATOM   3369  C   GLY B  65     -13.529  17.377-102.291  1.00  0.00           C  
ATOM   3370  O   GLY B  65     -13.712  16.167-102.454  1.00  0.00           O  
ATOM   3371  H   GLY B  65     -12.611  20.233-103.045  1.00  0.00           H  
ATOM   3372 1HA  GLY B  65     -14.142  18.670-103.850  1.00  0.00           H  
ATOM   3373 2HA  GLY B  65     -12.818  17.600-104.271  1.00  0.00           H  
ATOM   3374  N   VAL B  66     -13.595  17.958-101.099  1.00  0.00           N  
ATOM   3375  CA  VAL B  66     -13.759  17.165 -99.888  1.00  0.00           C  
ATOM   3376  C   VAL B  66     -14.984  17.609 -99.107  1.00  0.00           C  
ATOM   3377  O   VAL B  66     -15.679  18.552 -99.493  1.00  0.00           O  
ATOM   3378  CB  VAL B  66     -12.511  17.288 -98.993  1.00  0.00           C  
ATOM   3379  CG1 VAL B  66     -11.277  16.790 -99.730  1.00  0.00           C  
ATOM   3380  CG2 VAL B  66     -12.330  18.732 -98.552  1.00  0.00           C  
ATOM   3381  H   VAL B  66     -13.532  18.963-101.025  1.00  0.00           H  
ATOM   3382  HA  VAL B  66     -13.883  16.120-100.173  1.00  0.00           H  
ATOM   3383  HB  VAL B  66     -12.640  16.653 -98.117  1.00  0.00           H  
ATOM   3384 1HG1 VAL B  66     -10.404  16.884 -99.083  1.00  0.00           H  
ATOM   3385 2HG1 VAL B  66     -11.414  15.744-100.004  1.00  0.00           H  
ATOM   3386 3HG1 VAL B  66     -11.125  17.386-100.630  1.00  0.00           H  
ATOM   3387 1HG2 VAL B  66     -11.447  18.812 -97.920  1.00  0.00           H  
ATOM   3388 2HG2 VAL B  66     -12.207  19.368 -99.430  1.00  0.00           H  
ATOM   3389 3HG2 VAL B  66     -13.208  19.054 -97.991  1.00  0.00           H  
ATOM   3390  N   ALA B  67     -15.230  16.925 -97.991  1.00  0.00           N  
ATOM   3391  CA  ALA B  67     -16.349  17.243 -97.114  1.00  0.00           C  
ATOM   3392  C   ALA B  67     -16.130  18.559 -96.382  1.00  0.00           C  
ATOM   3393  O   ALA B  67     -15.011  18.885 -95.980  1.00  0.00           O  
ATOM   3394  CB  ALA B  67     -16.546  16.108 -96.117  1.00  0.00           C  
ATOM   3395  H   ALA B  67     -14.617  16.160 -97.748  1.00  0.00           H  
ATOM   3396  HA  ALA B  67     -17.242  17.353 -97.731  1.00  0.00           H  
ATOM   3397 1HB  ALA B  67     -17.383  16.343 -95.460  1.00  0.00           H  
ATOM   3398 2HB  ALA B  67     -16.755  15.184 -96.655  1.00  0.00           H  
ATOM   3399 3HB  ALA B  67     -15.642  15.986 -95.523  1.00  0.00           H  
ATOM   3400  N   THR B  68     -17.217  19.290 -96.157  1.00  0.00           N  
ATOM   3401  CA  THR B  68     -17.166  20.617 -95.561  1.00  0.00           C  
ATOM   3402  C   THR B  68     -17.314  20.570 -94.041  1.00  0.00           C  
ATOM   3403  O   THR B  68     -17.402  19.502 -93.428  1.00  0.00           O  
ATOM   3404  CB  THR B  68     -18.258  21.525 -96.156  1.00  0.00           C  
ATOM   3405  OG1 THR B  68     -19.550  21.033 -95.777  1.00  0.00           O  
ATOM   3406  CG2 THR B  68     -18.156  21.558 -97.673  1.00  0.00           C  
ATOM   3407  H   THR B  68     -18.113  18.900 -96.415  1.00  0.00           H  
ATOM   3408  HA  THR B  68     -16.193  21.057 -95.779  1.00  0.00           H  
ATOM   3409  HB  THR B  68     -18.141  22.537 -95.767  1.00  0.00           H  
ATOM   3410  HG1 THR B  68     -19.719  20.201 -96.225  1.00  0.00           H  
ATOM   3411 1HG2 THR B  68     -18.935  22.205 -98.076  1.00  0.00           H  
ATOM   3412 2HG2 THR B  68     -17.179  21.942 -97.964  1.00  0.00           H  
ATOM   3413 3HG2 THR B  68     -18.282  20.551 -98.067  1.00  0.00           H  
ATOM   3414  N   SER B  69     -17.337  21.760 -93.434  1.00  0.00           N  
ATOM   3415  CA  SER B  69     -17.342  21.903 -91.982  1.00  0.00           C  
ATOM   3416  C   SER B  69     -18.387  21.003 -91.344  1.00  0.00           C  
ATOM   3417  O   SER B  69     -18.072  20.124 -90.532  1.00  0.00           O  
ATOM   3418  CB  SER B  69     -17.607  23.346 -91.599  1.00  0.00           C  
ATOM   3419  OG  SER B  69     -17.683  23.490 -90.207  1.00  0.00           O  
ATOM   3420  H   SER B  69     -17.350  22.589 -94.010  1.00  0.00           H  
ATOM   3421  HA  SER B  69     -16.362  21.613 -91.601  1.00  0.00           H  
ATOM   3422 1HB  SER B  69     -16.809  23.978 -91.989  1.00  0.00           H  
ATOM   3423 2HB  SER B  69     -18.539  23.678 -92.053  1.00  0.00           H  
ATOM   3424  HG  SER B  69     -18.434  24.065 -90.042  1.00  0.00           H  
ATOM   3425  N   ALA B  70     -19.641  21.182 -91.745  1.00  0.00           N  
ATOM   3426  CA  ALA B  70     -20.761  20.469 -91.156  1.00  0.00           C  
ATOM   3427  C   ALA B  70     -20.873  19.048 -91.677  1.00  0.00           C  
ATOM   3428  O   ALA B  70     -21.576  18.227 -91.079  1.00  0.00           O  
ATOM   3429  CB  ALA B  70     -22.069  21.220 -91.417  1.00  0.00           C  
ATOM   3430  H   ALA B  70     -19.816  21.843 -92.489  1.00  0.00           H  
ATOM   3431  HA  ALA B  70     -20.594  20.406 -90.081  1.00  0.00           H  
ATOM   3432 1HB  ALA B  70     -22.898  20.672 -90.969  1.00  0.00           H  
ATOM   3433 2HB  ALA B  70     -22.011  22.215 -90.976  1.00  0.00           H  
ATOM   3434 3HB  ALA B  70     -22.230  21.308 -92.490  1.00  0.00           H  
ATOM   3435  N   ASP B  71     -20.204  18.735 -92.774  1.00  0.00           N  
ATOM   3436  CA  ASP B  71     -20.139  17.356 -93.198  1.00  0.00           C  
ATOM   3437  C   ASP B  71     -19.277  16.579 -92.231  1.00  0.00           C  
ATOM   3438  O   ASP B  71     -19.355  16.754 -91.017  1.00  0.00           O  
ATOM   3439  CB  ASP B  71     -19.606  17.232 -94.607  1.00  0.00           C  
ATOM   3440  CG  ASP B  71     -20.506  17.871 -95.596  1.00  0.00           C  
ATOM   3441  OD1 ASP B  71     -21.731  17.719 -95.413  1.00  0.00           O  
ATOM   3442  OD2 ASP B  71     -20.007  18.494 -96.547  1.00  0.00           O  
ATOM   3443  H   ASP B  71     -19.736  19.442 -93.323  1.00  0.00           H  
ATOM   3444  HA  ASP B  71     -21.149  16.945 -93.194  1.00  0.00           H  
ATOM   3445 1HB  ASP B  71     -18.621  17.696 -94.666  1.00  0.00           H  
ATOM   3446 2HB  ASP B  71     -19.487  16.178 -94.860  1.00  0.00           H  
ATOM   3447  N   ILE B  72     -18.359  15.816 -92.804  1.00  0.00           N  
ATOM   3448  CA  ILE B  72     -17.566  14.811 -92.113  1.00  0.00           C  
ATOM   3449  C   ILE B  72     -17.398  15.105 -90.627  1.00  0.00           C  
ATOM   3450  O   ILE B  72     -16.823  16.128 -90.244  1.00  0.00           O  
ATOM   3451  CB  ILE B  72     -16.176  14.686 -92.763  1.00  0.00           C  
ATOM   3452  CG1 ILE B  72     -15.390  13.539 -92.124  1.00  0.00           C  
ATOM   3453  CG2 ILE B  72     -15.411  15.994 -92.639  1.00  0.00           C  
ATOM   3454  CD1 ILE B  72     -14.140  13.157 -92.885  1.00  0.00           C  
ATOM   3455  H   ILE B  72     -18.215  15.961 -93.793  1.00  0.00           H  
ATOM   3456  HA  ILE B  72     -18.078  13.853 -92.194  1.00  0.00           H  
ATOM   3457  HB  ILE B  72     -16.289  14.441 -93.819  1.00  0.00           H  
ATOM   3458 1HG1 ILE B  72     -15.101  13.816 -91.111  1.00  0.00           H  
ATOM   3459 2HG1 ILE B  72     -16.026  12.656 -92.052  1.00  0.00           H  
ATOM   3460 1HG2 ILE B  72     -14.431  15.888 -93.103  1.00  0.00           H  
ATOM   3461 2HG2 ILE B  72     -15.965  16.788 -93.139  1.00  0.00           H  
ATOM   3462 3HG2 ILE B  72     -15.289  16.245 -91.585  1.00  0.00           H  
ATOM   3463 1HD1 ILE B  72     -13.637  12.337 -92.371  1.00  0.00           H  
ATOM   3464 2HD1 ILE B  72     -14.410  12.842 -93.894  1.00  0.00           H  
ATOM   3465 3HD1 ILE B  72     -13.471  14.015 -92.939  1.00  0.00           H  
ATOM   3466  N   LYS B  73     -17.904  14.202 -89.780  1.00  0.00           N  
ATOM   3467  CA  LYS B  73     -17.878  14.363 -88.327  1.00  0.00           C  
ATOM   3468  C   LYS B  73     -18.146  13.045 -87.619  1.00  0.00           C  
ATOM   3469  O   LYS B  73     -18.636  12.073 -88.199  1.00  0.00           O  
ATOM   3470  CB  LYS B  73     -18.901  15.411 -87.885  1.00  0.00           C  
ATOM   3471  CG  LYS B  73     -20.343  15.069 -88.234  1.00  0.00           C  
ATOM   3472  CD  LYS B  73     -21.287  16.200 -87.853  1.00  0.00           C  
ATOM   3473  CE  LYS B  73     -22.728  15.861 -88.206  1.00  0.00           C  
ATOM   3474  NZ  LYS B  73     -23.662  16.963 -87.847  1.00  0.00           N  
ATOM   3475  H   LYS B  73     -18.321  13.372 -90.176  1.00  0.00           H  
ATOM   3476  HA  LYS B  73     -16.884  14.701 -88.034  1.00  0.00           H  
ATOM   3477 1HB  LYS B  73     -18.841  15.544 -86.805  1.00  0.00           H  
ATOM   3478 2HB  LYS B  73     -18.663  16.369 -88.347  1.00  0.00           H  
ATOM   3479 1HG  LYS B  73     -20.425  14.884 -89.306  1.00  0.00           H  
ATOM   3480 2HG  LYS B  73     -20.641  14.164 -87.704  1.00  0.00           H  
ATOM   3481 1HD  LYS B  73     -21.218  16.386 -86.781  1.00  0.00           H  
ATOM   3482 2HD  LYS B  73     -20.998  17.108 -88.381  1.00  0.00           H  
ATOM   3483 1HE  LYS B  73     -22.806  15.669 -89.275  1.00  0.00           H  
ATOM   3484 2HE  LYS B  73     -23.031  14.959 -87.674  1.00  0.00           H  
ATOM   3485 1HZ  LYS B  73     -24.605  16.700 -88.096  1.00  0.00           H  
ATOM   3486 2HZ  LYS B  73     -23.612  17.138 -86.853  1.00  0.00           H  
ATOM   3487 3HZ  LYS B  73     -23.403  17.801 -88.349  1.00  0.00           H  
ATOM   3488  N   GLY B  74     -17.810  13.061 -86.329  1.00  0.00           N  
ATOM   3489  CA  GLY B  74     -17.939  11.899 -85.460  1.00  0.00           C  
ATOM   3490  C   GLY B  74     -17.155  12.104 -84.176  1.00  0.00           C  
ATOM   3491  O   GLY B  74     -17.237  13.157 -83.534  1.00  0.00           O  
ATOM   3492  H   GLY B  74     -17.450  13.924 -85.946  1.00  0.00           H  
ATOM   3493 1HA  GLY B  74     -18.991  11.729 -85.233  1.00  0.00           H  
ATOM   3494 2HA  GLY B  74     -17.576  11.013 -85.981  1.00  0.00           H  
ATOM   3495  N   LYS B  75     -16.385  11.074 -83.813  1.00  0.00           N  
ATOM   3496  CA  LYS B  75     -15.710  11.060 -82.524  1.00  0.00           C  
ATOM   3497  C   LYS B  75     -14.721  12.203 -82.404  1.00  0.00           C  
ATOM   3498  O   LYS B  75     -13.650  12.182 -83.012  1.00  0.00           O  
ATOM   3499  CB  LYS B  75     -14.995   9.725 -82.309  1.00  0.00           C  
ATOM   3500  CG  LYS B  75     -14.448   9.525 -80.902  1.00  0.00           C  
ATOM   3501  CD  LYS B  75     -13.734   8.188 -80.772  1.00  0.00           C  
ATOM   3502  CE  LYS B  75     -13.355   7.899 -79.327  1.00  0.00           C  
ATOM   3503  NZ  LYS B  75     -12.495   6.690 -79.207  1.00  0.00           N  
ATOM   3504  H   LYS B  75     -16.266  10.291 -84.440  1.00  0.00           H  
ATOM   3505  HA  LYS B  75     -16.457  11.185 -81.740  1.00  0.00           H  
ATOM   3506 1HB  LYS B  75     -15.682   8.906 -82.520  1.00  0.00           H  
ATOM   3507 2HB  LYS B  75     -14.162   9.642 -83.007  1.00  0.00           H  
ATOM   3508 1HG  LYS B  75     -13.746  10.326 -80.666  1.00  0.00           H  
ATOM   3509 2HG  LYS B  75     -15.267   9.561 -80.184  1.00  0.00           H  
ATOM   3510 1HD  LYS B  75     -14.384   7.391 -81.135  1.00  0.00           H  
ATOM   3511 2HD  LYS B  75     -12.828   8.198 -81.379  1.00  0.00           H  
ATOM   3512 1HE  LYS B  75     -12.821   8.753 -78.913  1.00  0.00           H  
ATOM   3513 2HE  LYS B  75     -14.260   7.745 -78.738  1.00  0.00           H  
ATOM   3514 1HZ  LYS B  75     -12.268   6.533 -78.235  1.00  0.00           H  
ATOM   3515 2HZ  LYS B  75     -12.990   5.887 -79.571  1.00  0.00           H  
ATOM   3516 3HZ  LYS B  75     -11.645   6.829 -79.733  1.00  0.00           H  
ATOM   3517  N   TYR B  76     -15.094  13.205 -81.610  1.00  0.00           N  
ATOM   3518  CA  TYR B  76     -14.260  14.372 -81.374  1.00  0.00           C  
ATOM   3519  C   TYR B  76     -13.984  15.145 -82.649  1.00  0.00           C  
ATOM   3520  O   TYR B  76     -12.960  15.819 -82.758  1.00  0.00           O  
ATOM   3521  CB  TYR B  76     -12.942  13.956 -80.718  1.00  0.00           C  
ATOM   3522  CG  TYR B  76     -13.119  13.162 -79.442  1.00  0.00           C  
ATOM   3523  CD1 TYR B  76     -12.345  12.033 -79.216  1.00  0.00           C  
ATOM   3524  CD2 TYR B  76     -14.053  13.563 -78.500  1.00  0.00           C  
ATOM   3525  CE1 TYR B  76     -12.507  11.308 -78.051  1.00  0.00           C  
ATOM   3526  CE2 TYR B  76     -14.215  12.838 -77.335  1.00  0.00           C  
ATOM   3527  CZ  TYR B  76     -13.446  11.715 -77.110  1.00  0.00           C  
ATOM   3528  OH  TYR B  76     -13.606  10.993 -75.949  1.00  0.00           O  
ATOM   3529  H   TYR B  76     -15.994  13.144 -81.157  1.00  0.00           H  
ATOM   3530  HA  TYR B  76     -14.791  15.045 -80.700  1.00  0.00           H  
ATOM   3531 1HB  TYR B  76     -12.362  13.352 -81.417  1.00  0.00           H  
ATOM   3532 2HB  TYR B  76     -12.355  14.844 -80.487  1.00  0.00           H  
ATOM   3533  HD1 TYR B  76     -11.611  11.718 -79.957  1.00  0.00           H  
ATOM   3534  HD2 TYR B  76     -14.662  14.450 -78.678  1.00  0.00           H  
ATOM   3535  HE1 TYR B  76     -11.900  10.421 -77.873  1.00  0.00           H  
ATOM   3536  HE2 TYR B  76     -14.950  13.153 -76.594  1.00  0.00           H  
ATOM   3537  HH  TYR B  76     -13.078  10.192 -75.996  1.00  0.00           H  
ATOM   3538  N   VAL B  77     -14.882  15.054 -83.627  1.00  0.00           N  
ATOM   3539  CA  VAL B  77     -14.781  15.811 -84.863  1.00  0.00           C  
ATOM   3540  C   VAL B  77     -16.075  16.585 -85.039  1.00  0.00           C  
ATOM   3541  O   VAL B  77     -17.129  15.989 -85.291  1.00  0.00           O  
ATOM   3542  CB  VAL B  77     -14.548  14.882 -86.069  1.00  0.00           C  
ATOM   3543  CG1 VAL B  77     -14.476  15.690 -87.357  1.00  0.00           C  
ATOM   3544  CG2 VAL B  77     -13.274  14.077 -85.865  1.00  0.00           C  
ATOM   3545  H   VAL B  77     -15.665  14.429 -83.495  1.00  0.00           H  
ATOM   3546  HA  VAL B  77     -13.930  16.489 -84.785  1.00  0.00           H  
ATOM   3547  HB  VAL B  77     -15.397  14.204 -86.163  1.00  0.00           H  
ATOM   3548 1HG1 VAL B  77     -14.311  15.017 -88.199  1.00  0.00           H  
ATOM   3549 2HG1 VAL B  77     -15.411  16.229 -87.501  1.00  0.00           H  
ATOM   3550 3HG1 VAL B  77     -13.652  16.400 -87.295  1.00  0.00           H  
ATOM   3551 1HG2 VAL B  77     -13.117  13.422 -86.721  1.00  0.00           H  
ATOM   3552 2HG2 VAL B  77     -12.427  14.756 -85.766  1.00  0.00           H  
ATOM   3553 3HG2 VAL B  77     -13.365  13.476 -84.960  1.00  0.00           H  
ATOM   3554  N   GLN B  78     -16.002  17.903 -84.918  1.00  0.00           N  
ATOM   3555  CA  GLN B  78     -17.191  18.722 -85.033  1.00  0.00           C  
ATOM   3556  C   GLN B  78     -17.171  19.597 -86.272  1.00  0.00           C  
ATOM   3557  O   GLN B  78     -18.231  20.018 -86.737  1.00  0.00           O  
ATOM   3558  CB  GLN B  78     -17.350  19.597 -83.786  1.00  0.00           C  
ATOM   3559  CG  GLN B  78     -17.504  18.815 -82.493  1.00  0.00           C  
ATOM   3560  CD  GLN B  78     -18.748  17.948 -82.485  1.00  0.00           C  
ATOM   3561  OE1 GLN B  78     -19.861  18.433 -82.708  1.00  0.00           O  
ATOM   3562  NE2 GLN B  78     -18.568  16.658 -82.227  1.00  0.00           N  
ATOM   3563  H   GLN B  78     -15.112  18.348 -84.744  1.00  0.00           H  
ATOM   3564  HA  GLN B  78     -18.057  18.066 -85.114  1.00  0.00           H  
ATOM   3565 1HB  GLN B  78     -16.482  20.248 -83.685  1.00  0.00           H  
ATOM   3566 2HB  GLN B  78     -18.226  20.236 -83.899  1.00  0.00           H  
ATOM   3567 1HG  GLN B  78     -16.636  18.168 -82.366  1.00  0.00           H  
ATOM   3568 2HG  GLN B  78     -17.571  19.517 -81.661  1.00  0.00           H  
ATOM   3569 1HE2 GLN B  78     -19.353  16.036 -82.208  1.00  0.00           H  
ATOM   3570 2HE2 GLN B  78     -17.648  16.306 -82.051  1.00  0.00           H  
ATOM   3571  N   SER B  79     -15.989  19.855 -86.822  1.00  0.00           N  
ATOM   3572  CA  SER B  79     -15.808  20.728 -87.969  1.00  0.00           C  
ATOM   3573  C   SER B  79     -14.459  20.403 -88.589  1.00  0.00           C  
ATOM   3574  O   SER B  79     -13.443  20.375 -87.895  1.00  0.00           O  
ATOM   3575  CB  SER B  79     -15.872  22.187 -87.559  1.00  0.00           C  
ATOM   3576  OG  SER B  79     -15.594  23.026 -88.646  1.00  0.00           O  
ATOM   3577  H   SER B  79     -15.181  19.411 -86.410  1.00  0.00           H  
ATOM   3578  HA  SER B  79     -16.611  20.536 -88.681  1.00  0.00           H  
ATOM   3579 1HB  SER B  79     -16.864  22.411 -87.167  1.00  0.00           H  
ATOM   3580 2HB  SER B  79     -15.156  22.372 -86.760  1.00  0.00           H  
ATOM   3581  HG  SER B  79     -16.417  23.109 -89.134  1.00  0.00           H  
ATOM   3582  N   VAL B  80     -14.474  20.111 -89.888  1.00  0.00           N  
ATOM   3583  CA  VAL B  80     -13.277  19.840 -90.674  1.00  0.00           C  
ATOM   3584  C   VAL B  80     -13.302  20.749 -91.893  1.00  0.00           C  
ATOM   3585  O   VAL B  80     -14.299  20.782 -92.618  1.00  0.00           O  
ATOM   3586  CB  VAL B  80     -13.221  18.365 -91.114  1.00  0.00           C  
ATOM   3587  CG1 VAL B  80     -11.984  18.109 -91.962  1.00  0.00           C  
ATOM   3588  CG2 VAL B  80     -13.234  17.459 -89.892  1.00  0.00           C  
ATOM   3589  H   VAL B  80     -15.377  20.079 -90.339  1.00  0.00           H  
ATOM   3590  HA  VAL B  80     -12.403  20.046 -90.056  1.00  0.00           H  
ATOM   3591  HB  VAL B  80     -14.088  18.148 -91.738  1.00  0.00           H  
ATOM   3592 1HG1 VAL B  80     -11.960  17.062 -92.264  1.00  0.00           H  
ATOM   3593 2HG1 VAL B  80     -12.013  18.742 -92.849  1.00  0.00           H  
ATOM   3594 3HG1 VAL B  80     -11.091  18.338 -91.380  1.00  0.00           H  
ATOM   3595 1HG2 VAL B  80     -13.195  16.418 -90.210  1.00  0.00           H  
ATOM   3596 2HG2 VAL B  80     -12.370  17.681 -89.265  1.00  0.00           H  
ATOM   3597 3HG2 VAL B  80     -14.148  17.630 -89.323  1.00  0.00           H  
ATOM   3598  N   THR B  81     -12.202  21.448 -92.161  1.00  0.00           N  
ATOM   3599  CA  THR B  81     -12.154  22.292 -93.345  1.00  0.00           C  
ATOM   3600  C   THR B  81     -10.736  22.401 -93.878  1.00  0.00           C  
ATOM   3601  O   THR B  81      -9.774  22.336 -93.117  1.00  0.00           O  
ATOM   3602  CB  THR B  81     -12.706  23.698 -93.048  1.00  0.00           C  
ATOM   3603  OG1 THR B  81     -12.839  24.431 -94.273  1.00  0.00           O  
ATOM   3604  CG2 THR B  81     -11.774  24.450 -92.110  1.00  0.00           C  
ATOM   3605  H   THR B  81     -11.395  21.404 -91.555  1.00  0.00           H  
ATOM   3606  HA  THR B  81     -12.773  21.837 -94.119  1.00  0.00           H  
ATOM   3607  HB  THR B  81     -13.688  23.613 -92.583  1.00  0.00           H  
ATOM   3608  HG1 THR B  81     -11.977  24.754 -94.546  1.00  0.00           H  
ATOM   3609 1HG2 THR B  81     -12.180  25.442 -91.911  1.00  0.00           H  
ATOM   3610 2HG2 THR B  81     -11.680  23.902 -91.173  1.00  0.00           H  
ATOM   3611 3HG2 THR B  81     -10.793  24.547 -92.573  1.00  0.00           H  
ATOM   3612  N   VAL B  82     -10.620  22.601 -95.192  1.00  0.00           N  
ATOM   3613  CA  VAL B  82      -9.335  22.747 -95.871  1.00  0.00           C  
ATOM   3614  C   VAL B  82      -9.050  24.228 -96.066  1.00  0.00           C  
ATOM   3615  O   VAL B  82      -9.880  24.959 -96.616  1.00  0.00           O  
ATOM   3616  CB  VAL B  82      -9.347  22.032 -97.235  1.00  0.00           C  
ATOM   3617  CG1 VAL B  82      -8.045  22.288 -97.981  1.00  0.00           C  
ATOM   3618  CG2 VAL B  82      -9.571  20.541 -97.037  1.00  0.00           C  
ATOM   3619  H   VAL B  82     -11.472  22.653 -95.733  1.00  0.00           H  
ATOM   3620  HA  VAL B  82      -8.562  22.292 -95.251  1.00  0.00           H  
ATOM   3621  HB  VAL B  82     -10.152  22.444 -97.844  1.00  0.00           H  
ATOM   3622 1HG1 VAL B  82      -8.071  21.775 -98.943  1.00  0.00           H  
ATOM   3623 2HG1 VAL B  82      -7.923  23.358 -98.144  1.00  0.00           H  
ATOM   3624 3HG1 VAL B  82      -7.209  21.911 -97.393  1.00  0.00           H  
ATOM   3625 1HG2 VAL B  82      -9.578  20.042 -98.005  1.00  0.00           H  
ATOM   3626 2HG2 VAL B  82      -8.768  20.131 -96.423  1.00  0.00           H  
ATOM   3627 3HG2 VAL B  82     -10.527  20.380 -96.538  1.00  0.00           H  
ATOM   3628  N   ALA B  83      -7.865  24.661 -95.652  1.00  0.00           N  
ATOM   3629  CA  ALA B  83      -7.438  26.044 -95.828  1.00  0.00           C  
ATOM   3630  C   ALA B  83      -6.121  26.060 -96.588  1.00  0.00           C  
ATOM   3631  O   ALA B  83      -5.061  25.894 -95.989  1.00  0.00           O  
ATOM   3632  CB  ALA B  83      -7.295  26.733 -94.477  1.00  0.00           C  
ATOM   3633  H   ALA B  83      -7.242  24.007 -95.201  1.00  0.00           H  
ATOM   3634  HA  ALA B  83      -8.198  26.561 -96.415  1.00  0.00           H  
ATOM   3635 1HB  ALA B  83      -6.976  27.765 -94.626  1.00  0.00           H  
ATOM   3636 2HB  ALA B  83      -8.255  26.722 -93.959  1.00  0.00           H  
ATOM   3637 3HB  ALA B  83      -6.554  26.208 -93.878  1.00  0.00           H  
ATOM   3638  N   ASN B  84      -6.183  26.290 -97.901  1.00  0.00           N  
ATOM   3639  CA  ASN B  84      -4.979  26.290 -98.724  1.00  0.00           C  
ATOM   3640  C   ASN B  84      -4.224  24.981 -98.541  1.00  0.00           C  
ATOM   3641  O   ASN B  84      -2.999  24.953 -98.403  1.00  0.00           O  
ATOM   3642  CB  ASN B  84      -4.093  27.477 -98.392  1.00  0.00           C  
ATOM   3643  CG  ASN B  84      -4.731  28.791 -98.747  1.00  0.00           C  
ATOM   3644  OD1 ASN B  84      -5.520  28.876 -99.695  1.00  0.00           O  
ATOM   3645  ND2 ASN B  84      -4.405  29.818 -98.004  1.00  0.00           N  
ATOM   3646  H   ASN B  84      -7.077  26.468 -98.337  1.00  0.00           H  
ATOM   3647  HA  ASN B  84      -5.275  26.364 -99.772  1.00  0.00           H  
ATOM   3648 1HB  ASN B  84      -3.865  27.473 -97.326  1.00  0.00           H  
ATOM   3649 2HB  ASN B  84      -3.149  27.387 -98.929  1.00  0.00           H  
ATOM   3650 1HD2 ASN B  84      -4.799  30.718 -98.194  1.00  0.00           H  
ATOM   3651 2HD2 ASN B  84      -3.762  29.703 -97.247  1.00  0.00           H  
ATOM   3652  N   GLY B  85      -4.980  23.886 -98.523  1.00  0.00           N  
ATOM   3653  CA  GLY B  85      -4.385  22.584 -98.412  1.00  0.00           C  
ATOM   3654  C   GLY B  85      -4.226  22.069 -97.002  1.00  0.00           C  
ATOM   3655  O   GLY B  85      -3.877  20.894 -96.829  1.00  0.00           O  
ATOM   3656  H   GLY B  85      -5.985  23.964 -98.587  1.00  0.00           H  
ATOM   3657 1HA  GLY B  85      -4.987  21.861 -98.962  1.00  0.00           H  
ATOM   3658 2HA  GLY B  85      -3.397  22.595 -98.871  1.00  0.00           H  
ATOM   3659  N   VAL B  86      -4.439  22.901 -95.991  1.00  0.00           N  
ATOM   3660  CA  VAL B  86      -4.270  22.464 -94.612  1.00  0.00           C  
ATOM   3661  C   VAL B  86      -5.606  22.012 -94.074  1.00  0.00           C  
ATOM   3662  O   VAL B  86      -6.602  22.744 -94.154  1.00  0.00           O  
ATOM   3663  CB  VAL B  86      -3.713  23.601 -93.734  1.00  0.00           C  
ATOM   3664  CG1 VAL B  86      -3.614  23.155 -92.283  1.00  0.00           C  
ATOM   3665  CG2 VAL B  86      -2.355  24.042 -94.258  1.00  0.00           C  
ATOM   3666  H   VAL B  86      -4.722  23.853 -96.174  1.00  0.00           H  
ATOM   3667  HA  VAL B  86      -3.558  21.638 -94.595  1.00  0.00           H  
ATOM   3668  HB  VAL B  86      -4.405  24.443 -93.765  1.00  0.00           H  
ATOM   3669 1HG1 VAL B  86      -3.219  23.971 -91.678  1.00  0.00           H  
ATOM   3670 2HG1 VAL B  86      -4.603  22.879 -91.919  1.00  0.00           H  
ATOM   3671 3HG1 VAL B  86      -2.947  22.296 -92.212  1.00  0.00           H  
ATOM   3672 1HG2 VAL B  86      -1.968  24.846 -93.633  1.00  0.00           H  
ATOM   3673 2HG2 VAL B  86      -1.664  23.198 -94.233  1.00  0.00           H  
ATOM   3674 3HG2 VAL B  86      -2.457  24.396 -95.284  1.00  0.00           H  
ATOM   3675  N   ILE B  87      -5.644  20.827 -93.486  1.00  0.00           N  
ATOM   3676  CA  ILE B  87      -6.871  20.247 -92.978  1.00  0.00           C  
ATOM   3677  C   ILE B  87      -6.965  20.529 -91.487  1.00  0.00           C  
ATOM   3678  O   ILE B  87      -6.133  20.056 -90.707  1.00  0.00           O  
ATOM   3679  CB  ILE B  87      -6.928  18.731 -93.236  1.00  0.00           C  
ATOM   3680  CG1 ILE B  87      -6.865  18.442 -94.738  1.00  0.00           C  
ATOM   3681  CG2 ILE B  87      -8.189  18.135 -92.629  1.00  0.00           C  
ATOM   3682  CD1 ILE B  87      -6.629  16.987 -95.071  1.00  0.00           C  
ATOM   3683  H   ILE B  87      -4.780  20.312 -93.392  1.00  0.00           H  
ATOM   3684  HA  ILE B  87      -7.712  20.711 -93.492  1.00  0.00           H  
ATOM   3685  HB  ILE B  87      -6.059  18.252 -92.786  1.00  0.00           H  
ATOM   3686 1HG1 ILE B  87      -7.797  18.753 -95.208  1.00  0.00           H  
ATOM   3687 2HG1 ILE B  87      -6.062  19.028 -95.188  1.00  0.00           H  
ATOM   3688 1HG2 ILE B  87      -8.214  17.062 -92.822  1.00  0.00           H  
ATOM   3689 2HG2 ILE B  87      -8.194  18.310 -91.555  1.00  0.00           H  
ATOM   3690 3HG2 ILE B  87      -9.066  18.604 -93.077  1.00  0.00           H  
ATOM   3691 1HD1 ILE B  87      -6.595  16.862 -96.154  1.00  0.00           H  
ATOM   3692 2HD1 ILE B  87      -5.681  16.664 -94.639  1.00  0.00           H  
ATOM   3693 3HD1 ILE B  87      -7.438  16.384 -94.662  1.00  0.00           H  
ATOM   3694  N   THR B  88      -7.972  21.307 -91.088  1.00  0.00           N  
ATOM   3695  CA  THR B  88      -8.114  21.658 -89.684  1.00  0.00           C  
ATOM   3696  C   THR B  88      -9.384  21.038 -89.125  1.00  0.00           C  
ATOM   3697  O   THR B  88     -10.459  21.158 -89.715  1.00  0.00           O  
ATOM   3698  CB  THR B  88      -8.140  23.184 -89.483  1.00  0.00           C  
ATOM   3699  OG1 THR B  88      -6.918  23.754 -89.971  1.00  0.00           O  
ATOM   3700  CG2 THR B  88      -8.302  23.526 -88.010  1.00  0.00           C  
ATOM   3701  H   THR B  88      -8.645  21.660 -91.753  1.00  0.00           H  
ATOM   3702  HA  THR B  88      -7.258  21.258 -89.139  1.00  0.00           H  
ATOM   3703  HB  THR B  88      -8.973  23.610 -90.043  1.00  0.00           H  
ATOM   3704  HG1 THR B  88      -6.211  23.577 -89.346  1.00  0.00           H  
ATOM   3705 1HG2 THR B  88      -8.318  24.609 -87.887  1.00  0.00           H  
ATOM   3706 2HG2 THR B  88      -9.235  23.104 -87.639  1.00  0.00           H  
ATOM   3707 3HG2 THR B  88      -7.467  23.111 -87.447  1.00  0.00           H  
ATOM   3708  N   ALA B  89      -9.252  20.392 -87.969  1.00  0.00           N  
ATOM   3709  CA  ALA B  89     -10.362  19.694 -87.330  1.00  0.00           C  
ATOM   3710  C   ALA B  89     -10.633  20.334 -85.975  1.00  0.00           C  
ATOM   3711  O   ALA B  89      -9.703  20.737 -85.278  1.00  0.00           O  
ATOM   3712  CB  ALA B  89     -10.059  18.210 -87.148  1.00  0.00           C  
ATOM   3713  H   ALA B  89      -8.346  20.389 -87.522  1.00  0.00           H  
ATOM   3714  HA  ALA B  89     -11.242  19.807 -87.963  1.00  0.00           H  
ATOM   3715 1HB  ALA B  89     -10.907  17.721 -86.669  1.00  0.00           H  
ATOM   3716 2HB  ALA B  89      -9.879  17.754 -88.122  1.00  0.00           H  
ATOM   3717 3HB  ALA B  89      -9.174  18.094 -86.525  1.00  0.00           H  
ATOM   3718  N   GLN B  90     -11.908  20.397 -85.589  1.00  0.00           N  
ATOM   3719  CA  GLN B  90     -12.266  20.939 -84.288  1.00  0.00           C  
ATOM   3720  C   GLN B  90     -12.733  19.868 -83.322  1.00  0.00           C  
ATOM   3721  O   GLN B  90     -13.429  18.924 -83.699  1.00  0.00           O  
ATOM   3722  CB  GLN B  90     -13.355  22.004 -84.442  1.00  0.00           C  
ATOM   3723  CG  GLN B  90     -13.716  22.715 -83.149  1.00  0.00           C  
ATOM   3724  CD  GLN B  90     -14.708  23.842 -83.366  1.00  0.00           C  
ATOM   3725  OE1 GLN B  90     -15.462  23.844 -84.343  1.00  0.00           O  
ATOM   3726  NE2 GLN B  90     -14.713  24.808 -82.455  1.00  0.00           N  
ATOM   3727  H   GLN B  90     -12.640  20.066 -86.203  1.00  0.00           H  
ATOM   3728  HA  GLN B  90     -11.381  21.402 -83.852  1.00  0.00           H  
ATOM   3729 1HB  GLN B  90     -13.030  22.756 -85.160  1.00  0.00           H  
ATOM   3730 2HB  GLN B  90     -14.261  21.543 -84.836  1.00  0.00           H  
ATOM   3731 1HG  GLN B  90     -14.161  21.995 -82.462  1.00  0.00           H  
ATOM   3732 2HG  GLN B  90     -12.810  23.137 -82.713  1.00  0.00           H  
ATOM   3733 1HE2 GLN B  90     -15.347  25.578 -82.546  1.00  0.00           H  
ATOM   3734 2HE2 GLN B  90     -14.085  24.767 -81.678  1.00  0.00           H  
ATOM   3735  N   MET B  91     -12.370  20.051 -82.057  1.00  0.00           N  
ATOM   3736  CA  MET B  91     -12.675  19.055 -81.053  1.00  0.00           C  
ATOM   3737  C   MET B  91     -14.111  19.178 -80.591  1.00  0.00           C  
ATOM   3738  O   MET B  91     -14.801  20.154 -80.867  1.00  0.00           O  
ATOM   3739  CB  MET B  91     -11.719  19.186 -79.869  1.00  0.00           C  
ATOM   3740  CG  MET B  91     -10.301  18.708 -80.149  1.00  0.00           C  
ATOM   3741  SD  MET B  91     -10.221  16.943 -80.512  1.00  0.00           S  
ATOM   3742  CE  MET B  91     -10.666  16.250 -78.922  1.00  0.00           C  
ATOM   3743  H   MET B  91     -11.877  20.889 -81.785  1.00  0.00           H  
ATOM   3744  HA  MET B  91     -12.550  18.067 -81.496  1.00  0.00           H  
ATOM   3745 1HB  MET B  91     -11.664  20.229 -79.560  1.00  0.00           H  
ATOM   3746 2HB  MET B  91     -12.104  18.614 -79.024  1.00  0.00           H  
ATOM   3747 1HG  MET B  91      -9.894  19.254 -81.000  1.00  0.00           H  
ATOM   3748 2HG  MET B  91      -9.671  18.910 -79.283  1.00  0.00           H  
ATOM   3749 1HE  MET B  91     -10.661  15.162 -78.985  1.00  0.00           H  
ATOM   3750 2HE  MET B  91      -9.946  16.574 -78.169  1.00  0.00           H  
ATOM   3751 3HE  MET B  91     -11.663  16.593 -78.642  1.00  0.00           H  
ATOM   3752  N   ALA B  92     -14.554  18.165 -79.860  1.00  0.00           N  
ATOM   3753  CA  ALA B  92     -15.903  18.179 -79.339  1.00  0.00           C  
ATOM   3754  C   ALA B  92     -16.018  19.190 -78.210  1.00  0.00           C  
ATOM   3755  O   ALA B  92     -15.030  19.585 -77.585  1.00  0.00           O  
ATOM   3756  CB  ALA B  92     -16.305  16.793 -78.838  1.00  0.00           C  
ATOM   3757  H   ALA B  92     -13.957  17.375 -79.660  1.00  0.00           H  
ATOM   3758  HA  ALA B  92     -16.574  18.482 -80.142  1.00  0.00           H  
ATOM   3759 1HB  ALA B  92     -17.323  16.828 -78.450  1.00  0.00           H  
ATOM   3760 2HB  ALA B  92     -16.254  16.080 -79.661  1.00  0.00           H  
ATOM   3761 3HB  ALA B  92     -15.626  16.482 -78.046  1.00  0.00           H  
ATOM   3762  N   SER B  93     -17.249  19.596 -77.940  1.00  0.00           N  
ATOM   3763  CA  SER B  93     -17.513  20.555 -76.887  1.00  0.00           C  
ATOM   3764  C   SER B  93     -17.849  19.906 -75.556  1.00  0.00           C  
ATOM   3765  O   SER B  93     -18.102  20.624 -74.583  1.00  0.00           O  
ATOM   3766  CB  SER B  93     -18.651  21.466 -77.306  1.00  0.00           C  
ATOM   3767  OG  SER B  93     -19.848  20.748 -77.428  1.00  0.00           O  
ATOM   3768  H   SER B  93     -18.022  19.232 -78.478  1.00  0.00           H  
ATOM   3769  HA  SER B  93     -16.614  21.154 -76.732  1.00  0.00           H  
ATOM   3770 1HB  SER B  93     -18.772  22.259 -76.569  1.00  0.00           H  
ATOM   3771 2HB  SER B  93     -18.408  21.938 -78.257  1.00  0.00           H  
ATOM   3772  HG  SER B  93     -19.843  20.101 -76.719  1.00  0.00           H  
ATOM   3773  N   SER B  94     -17.851  18.574 -75.482  1.00  0.00           N  
ATOM   3774  CA  SER B  94     -18.200  17.881 -74.249  1.00  0.00           C  
ATOM   3775  C   SER B  94     -17.435  16.567 -74.176  1.00  0.00           C  
ATOM   3776  O   SER B  94     -17.019  16.014 -75.196  1.00  0.00           O  
ATOM   3777  CB  SER B  94     -19.693  17.626 -74.183  1.00  0.00           C  
ATOM   3778  OG  SER B  94     -20.092  16.721 -75.175  1.00  0.00           O  
ATOM   3779  H   SER B  94     -17.605  18.032 -76.298  1.00  0.00           H  
ATOM   3780  HA  SER B  94     -17.918  18.513 -73.405  1.00  0.00           H  
ATOM   3781 1HB  SER B  94     -19.952  17.230 -73.201  1.00  0.00           H  
ATOM   3782 2HB  SER B  94     -20.229  18.566 -74.308  1.00  0.00           H  
ATOM   3783  HG  SER B  94     -20.451  15.960 -74.712  1.00  0.00           H  
ATOM   3784  N   ASN B  95     -17.288  16.060 -72.947  1.00  0.00           N  
ATOM   3785  CA  ASN B  95     -16.595  14.796 -72.692  1.00  0.00           C  
ATOM   3786  C   ASN B  95     -15.135  14.893 -73.092  1.00  0.00           C  
ATOM   3787  O   ASN B  95     -14.503  13.911 -73.475  1.00  0.00           O  
ATOM   3788  CB  ASN B  95     -17.272  13.650 -73.421  1.00  0.00           C  
ATOM   3789  CG  ASN B  95     -18.688  13.431 -72.966  1.00  0.00           C  
ATOM   3790  OD1 ASN B  95     -18.995  13.549 -71.774  1.00  0.00           O  
ATOM   3791  ND2 ASN B  95     -19.557  13.114 -73.892  1.00  0.00           N  
ATOM   3792  H   ASN B  95     -17.673  16.576 -72.169  1.00  0.00           H  
ATOM   3793  HA  ASN B  95     -16.631  14.592 -71.620  1.00  0.00           H  
ATOM   3794 1HB  ASN B  95     -17.275  13.851 -74.493  1.00  0.00           H  
ATOM   3795 2HB  ASN B  95     -16.706  12.732 -73.262  1.00  0.00           H  
ATOM   3796 1HD2 ASN B  95     -20.514  12.956 -73.647  1.00  0.00           H  
ATOM   3797 2HD2 ASN B  95     -19.264  13.029 -74.844  1.00  0.00           H  
ATOM   3798  N   VAL B  96     -14.601  16.100 -72.986  1.00  0.00           N  
ATOM   3799  CA  VAL B  96     -13.225  16.389 -73.326  1.00  0.00           C  
ATOM   3800  C   VAL B  96     -12.683  17.301 -72.250  1.00  0.00           C  
ATOM   3801  O   VAL B  96     -13.422  17.895 -71.467  1.00  0.00           O  
ATOM   3802  CB  VAL B  96     -13.118  17.063 -74.706  1.00  0.00           C  
ATOM   3803  CG1 VAL B  96     -13.616  16.127 -75.797  1.00  0.00           C  
ATOM   3804  CG2 VAL B  96     -13.906  18.364 -74.710  1.00  0.00           C  
ATOM   3805  H   VAL B  96     -15.192  16.847 -72.650  1.00  0.00           H  
ATOM   3806  HA  VAL B  96     -12.673  15.449 -73.362  1.00  0.00           H  
ATOM   3807  HB  VAL B  96     -12.069  17.272 -74.917  1.00  0.00           H  
ATOM   3808 1HG1 VAL B  96     -13.533  16.620 -76.766  1.00  0.00           H  
ATOM   3809 2HG1 VAL B  96     -13.015  15.218 -75.800  1.00  0.00           H  
ATOM   3810 3HG1 VAL B  96     -14.659  15.873 -75.609  1.00  0.00           H  
ATOM   3811 1HG2 VAL B  96     -13.825  18.836 -75.689  1.00  0.00           H  
ATOM   3812 2HG2 VAL B  96     -14.954  18.155 -74.493  1.00  0.00           H  
ATOM   3813 3HG2 VAL B  96     -13.505  19.035 -73.950  1.00  0.00           H  
ATOM   3814  N   ASN B  97     -11.371  17.409 -72.226  1.00  0.00           N  
ATOM   3815  CA  ASN B  97     -10.787  18.310 -71.262  1.00  0.00           C  
ATOM   3816  C   ASN B  97     -11.065  19.728 -71.704  1.00  0.00           C  
ATOM   3817  O   ASN B  97     -11.190  20.005 -72.900  1.00  0.00           O  
ATOM   3818  CB  ASN B  97      -9.299  18.062 -71.104  1.00  0.00           C  
ATOM   3819  CG  ASN B  97      -8.722  18.756 -69.901  1.00  0.00           C  
ATOM   3820  OD1 ASN B  97      -8.600  19.986 -69.878  1.00  0.00           O  
ATOM   3821  ND2 ASN B  97      -8.364  17.991 -68.902  1.00  0.00           N  
ATOM   3822  H   ASN B  97     -10.765  16.893 -72.847  1.00  0.00           H  
ATOM   3823  HA  ASN B  97     -11.266  18.141 -70.296  1.00  0.00           H  
ATOM   3824 1HB  ASN B  97      -9.115  16.991 -71.014  1.00  0.00           H  
ATOM   3825 2HB  ASN B  97      -8.775  18.410 -71.995  1.00  0.00           H  
ATOM   3826 1HD2 ASN B  97      -7.974  18.398 -68.075  1.00  0.00           H  
ATOM   3827 2HD2 ASN B  97      -8.480  17.001 -68.964  1.00  0.00           H  
ATOM   3828  N   ASN B  98     -11.165  20.618 -70.721  1.00  0.00           N  
ATOM   3829  CA  ASN B  98     -11.471  22.014 -70.993  1.00  0.00           C  
ATOM   3830  C   ASN B  98     -10.355  22.675 -71.789  1.00  0.00           C  
ATOM   3831  O   ASN B  98     -10.576  23.654 -72.506  1.00  0.00           O  
ATOM   3832  CB  ASN B  98     -11.724  22.768 -69.701  1.00  0.00           C  
ATOM   3833  CG  ASN B  98     -13.038  22.403 -69.067  1.00  0.00           C  
ATOM   3834  OD1 ASN B  98     -13.967  21.956 -69.749  1.00  0.00           O  
ATOM   3835  ND2 ASN B  98     -13.134  22.584 -67.775  1.00  0.00           N  
ATOM   3836  H   ASN B  98     -11.026  20.322 -69.765  1.00  0.00           H  
ATOM   3837  HA  ASN B  98     -12.374  22.058 -71.604  1.00  0.00           H  
ATOM   3838 1HB  ASN B  98     -10.922  22.557 -68.993  1.00  0.00           H  
ATOM   3839 2HB  ASN B  98     -11.714  23.840 -69.897  1.00  0.00           H  
ATOM   3840 1HD2 ASN B  98     -13.984  22.359 -67.299  1.00  0.00           H  
ATOM   3841 2HD2 ASN B  98     -12.356  22.948 -67.262  1.00  0.00           H  
ATOM   3842  N   GLU B  99      -9.147  22.120 -71.695  1.00  0.00           N  
ATOM   3843  CA  GLU B  99      -7.984  22.695 -72.351  1.00  0.00           C  
ATOM   3844  C   GLU B  99      -7.877  22.221 -73.793  1.00  0.00           C  
ATOM   3845  O   GLU B  99      -6.977  22.628 -74.538  1.00  0.00           O  
ATOM   3846  CB  GLU B  99      -6.708  22.334 -71.587  1.00  0.00           C  
ATOM   3847  CG  GLU B  99      -6.643  22.891 -70.172  1.00  0.00           C  
ATOM   3848  CD  GLU B  99      -6.580  24.393 -70.138  1.00  0.00           C  
ATOM   3849  OE1 GLU B  99      -5.725  24.947 -70.786  1.00  0.00           O  
ATOM   3850  OE2 GLU B  99      -7.387  24.986 -69.462  1.00  0.00           O  
ATOM   3851  H   GLU B  99      -9.038  21.275 -71.151  1.00  0.00           H  
ATOM   3852  HA  GLU B  99      -8.092  23.780 -72.357  1.00  0.00           H  
ATOM   3853 1HB  GLU B  99      -6.617  21.249 -71.524  1.00  0.00           H  
ATOM   3854 2HB  GLU B  99      -5.840  22.704 -72.133  1.00  0.00           H  
ATOM   3855 1HG  GLU B  99      -7.525  22.563 -69.623  1.00  0.00           H  
ATOM   3856 2HG  GLU B  99      -5.766  22.483 -69.672  1.00  0.00           H  
ATOM   3857  N   ILE B 100      -8.831  21.396 -74.221  1.00  0.00           N  
ATOM   3858  CA  ILE B 100      -8.927  20.958 -75.605  1.00  0.00           C  
ATOM   3859  C   ILE B 100     -10.335  21.146 -76.125  1.00  0.00           C  
ATOM   3860  O   ILE B 100     -10.636  20.783 -77.267  1.00  0.00           O  
ATOM   3861  CB  ILE B 100      -8.517  19.481 -75.751  1.00  0.00           C  
ATOM   3862  CG1 ILE B 100      -9.496  18.578 -74.996  1.00  0.00           C  
ATOM   3863  CG2 ILE B 100      -7.097  19.271 -75.248  1.00  0.00           C  
ATOM   3864  CD1 ILE B 100      -9.296  17.103 -75.262  1.00  0.00           C  
ATOM   3865  H   ILE B 100      -9.511  21.066 -73.552  1.00  0.00           H  
ATOM   3866  HA  ILE B 100      -8.249  21.562 -76.207  1.00  0.00           H  
ATOM   3867  HB  ILE B 100      -8.567  19.192 -76.801  1.00  0.00           H  
ATOM   3868 1HG1 ILE B 100      -9.395  18.748 -73.925  1.00  0.00           H  
ATOM   3869 2HG1 ILE B 100     -10.518  18.838 -75.273  1.00  0.00           H  
ATOM   3870 1HG2 ILE B 100      -6.824  18.222 -75.358  1.00  0.00           H  
ATOM   3871 2HG2 ILE B 100      -6.411  19.887 -75.828  1.00  0.00           H  
ATOM   3872 3HG2 ILE B 100      -7.038  19.553 -74.197  1.00  0.00           H  
ATOM   3873 1HD1 ILE B 100     -10.026  16.528 -74.692  1.00  0.00           H  
ATOM   3874 2HD1 ILE B 100      -9.428  16.904 -76.326  1.00  0.00           H  
ATOM   3875 3HD1 ILE B 100      -8.291  16.812 -74.960  1.00  0.00           H  
ATOM   3876  N   LYS B 101     -11.212  21.624 -75.261  1.00  0.00           N  
ATOM   3877  CA  LYS B 101     -12.623  21.657 -75.573  1.00  0.00           C  
ATOM   3878  C   LYS B 101     -12.895  22.637 -76.701  1.00  0.00           C  
ATOM   3879  O   LYS B 101     -12.476  23.795 -76.648  1.00  0.00           O  
ATOM   3880  CB  LYS B 101     -13.438  22.030 -74.334  1.00  0.00           C  
ATOM   3881  CG  LYS B 101     -14.947  21.993 -74.539  1.00  0.00           C  
ATOM   3882  CD  LYS B 101     -15.688  22.296 -73.245  1.00  0.00           C  
ATOM   3883  CE  LYS B 101     -15.655  21.107 -72.296  1.00  0.00           C  
ATOM   3884  NZ  LYS B 101     -16.436  21.363 -71.056  1.00  0.00           N  
ATOM   3885  H   LYS B 101     -10.897  21.973 -74.367  1.00  0.00           H  
ATOM   3886  HA  LYS B 101     -12.928  20.664 -75.904  1.00  0.00           H  
ATOM   3887 1HB  LYS B 101     -13.195  21.347 -73.519  1.00  0.00           H  
ATOM   3888 2HB  LYS B 101     -13.169  23.036 -74.010  1.00  0.00           H  
ATOM   3889 1HG  LYS B 101     -15.230  22.731 -75.291  1.00  0.00           H  
ATOM   3890 2HG  LYS B 101     -15.242  21.007 -74.894  1.00  0.00           H  
ATOM   3891 1HD  LYS B 101     -15.229  23.155 -72.755  1.00  0.00           H  
ATOM   3892 2HD  LYS B 101     -16.727  22.540 -73.470  1.00  0.00           H  
ATOM   3893 1HE  LYS B 101     -16.065  20.231 -72.796  1.00  0.00           H  
ATOM   3894 2HE  LYS B 101     -14.622  20.891 -72.021  1.00  0.00           H  
ATOM   3895 1HZ  LYS B 101     -16.389  20.553 -70.454  1.00  0.00           H  
ATOM   3896 2HZ  LYS B 101     -16.052  22.164 -70.574  1.00  0.00           H  
ATOM   3897 3HZ  LYS B 101     -17.400  21.547 -71.297  1.00  0.00           H  
ATOM   3898  N   SER B 102     -13.560  22.144 -77.745  1.00  0.00           N  
ATOM   3899  CA  SER B 102     -13.926  22.953 -78.901  1.00  0.00           C  
ATOM   3900  C   SER B 102     -12.724  23.698 -79.478  1.00  0.00           C  
ATOM   3901  O   SER B 102     -12.839  24.804 -80.007  1.00  0.00           O  
ATOM   3902  CB  SER B 102     -15.005  23.946 -78.516  1.00  0.00           C  
ATOM   3903  OG  SER B 102     -16.162  23.286 -78.082  1.00  0.00           O  
ATOM   3904  H   SER B 102     -13.819  21.167 -77.726  1.00  0.00           H  
ATOM   3905  HA  SER B 102     -14.314  22.292 -79.678  1.00  0.00           H  
ATOM   3906 1HB  SER B 102     -14.635  24.596 -77.724  1.00  0.00           H  
ATOM   3907 2HB  SER B 102     -15.242  24.576 -79.372  1.00  0.00           H  
ATOM   3908  HG  SER B 102     -16.901  23.771 -78.457  1.00  0.00           H  
ATOM   3909  N   LYS B 103     -11.554  23.084 -79.352  1.00  0.00           N  
ATOM   3910  CA  LYS B 103     -10.339  23.638 -79.926  1.00  0.00           C  
ATOM   3911  C   LYS B 103      -9.905  22.863 -81.166  1.00  0.00           C  
ATOM   3912  O   LYS B 103     -10.343  21.737 -81.403  1.00  0.00           O  
ATOM   3913  CB  LYS B 103      -9.216  23.644 -78.888  1.00  0.00           C  
ATOM   3914  CG  LYS B 103      -9.431  24.615 -77.735  1.00  0.00           C  
ATOM   3915  CD  LYS B 103      -8.283  24.553 -76.739  1.00  0.00           C  
ATOM   3916  CE  LYS B 103      -8.430  25.613 -75.657  1.00  0.00           C  
ATOM   3917  NZ  LYS B 103      -8.091  26.972 -76.160  1.00  0.00           N  
ATOM   3918  H   LYS B 103     -11.506  22.212 -78.846  1.00  0.00           H  
ATOM   3919  HA  LYS B 103     -10.538  24.665 -80.233  1.00  0.00           H  
ATOM   3920 1HB  LYS B 103      -9.104  22.644 -78.467  1.00  0.00           H  
ATOM   3921 2HB  LYS B 103      -8.274  23.902 -79.372  1.00  0.00           H  
ATOM   3922 1HG  LYS B 103      -9.508  25.631 -78.124  1.00  0.00           H  
ATOM   3923 2HG  LYS B 103     -10.360  24.371 -77.221  1.00  0.00           H  
ATOM   3924 1HD  LYS B 103      -8.260  23.568 -76.270  1.00  0.00           H  
ATOM   3925 2HD  LYS B 103      -7.339  24.710 -77.261  1.00  0.00           H  
ATOM   3926 1HE  LYS B 103      -9.455  25.619 -75.291  1.00  0.00           H  
ATOM   3927 2HE  LYS B 103      -7.771  25.374 -74.822  1.00  0.00           H  
ATOM   3928 1HZ  LYS B 103      -8.201  27.645 -75.414  1.00  0.00           H  
ATOM   3929 2HZ  LYS B 103      -7.135  26.983 -76.485  1.00  0.00           H  
ATOM   3930 3HZ  LYS B 103      -8.709  27.213 -76.922  1.00  0.00           H  
ATOM   3931  N   LYS B 104      -9.008  23.473 -81.943  1.00  0.00           N  
ATOM   3932  CA  LYS B 104      -8.652  22.993 -83.271  1.00  0.00           C  
ATOM   3933  C   LYS B 104      -7.209  22.525 -83.340  1.00  0.00           C  
ATOM   3934  O   LYS B 104      -6.360  22.872 -82.520  1.00  0.00           O  
ATOM   3935  CB  LYS B 104      -8.894  24.085 -84.314  1.00  0.00           C  
ATOM   3936  CG  LYS B 104     -10.346  24.527 -84.436  1.00  0.00           C  
ATOM   3937  CD  LYS B 104     -10.482  25.728 -85.360  1.00  0.00           C  
ATOM   3938  CE  LYS B 104     -11.891  26.300 -85.323  1.00  0.00           C  
ATOM   3939  NZ  LYS B 104     -11.947  27.681 -85.873  1.00  0.00           N  
ATOM   3940  H   LYS B 104      -8.562  24.306 -81.584  1.00  0.00           H  
ATOM   3941  HA  LYS B 104      -9.282  22.135 -83.510  1.00  0.00           H  
ATOM   3942 1HB  LYS B 104      -8.296  24.963 -84.066  1.00  0.00           H  
ATOM   3943 2HB  LYS B 104      -8.568  23.733 -85.292  1.00  0.00           H  
ATOM   3944 1HG  LYS B 104     -10.944  23.706 -84.831  1.00  0.00           H  
ATOM   3945 2HG  LYS B 104     -10.730  24.792 -83.451  1.00  0.00           H  
ATOM   3946 1HD  LYS B 104      -9.776  26.503 -85.057  1.00  0.00           H  
ATOM   3947 2HD  LYS B 104     -10.249  25.429 -86.382  1.00  0.00           H  
ATOM   3948 1HE  LYS B 104     -12.557  25.664 -85.904  1.00  0.00           H  
ATOM   3949 2HE  LYS B 104     -12.249  26.318 -84.293  1.00  0.00           H  
ATOM   3950 1HZ  LYS B 104     -12.896  28.024 -85.830  1.00  0.00           H  
ATOM   3951 2HZ  LYS B 104     -11.346  28.285 -85.329  1.00  0.00           H  
ATOM   3952 3HZ  LYS B 104     -11.635  27.674 -86.834  1.00  0.00           H  
ATOM   3953  N   LEU B 105      -6.928  21.766 -84.393  1.00  0.00           N  
ATOM   3954  CA  LEU B 105      -5.565  21.408 -84.733  1.00  0.00           C  
ATOM   3955  C   LEU B 105      -5.517  21.107 -86.218  1.00  0.00           C  
ATOM   3956  O   LEU B 105      -6.516  20.710 -86.828  1.00  0.00           O  
ATOM   3957  CB  LEU B 105      -5.095  20.193 -83.923  1.00  0.00           C  
ATOM   3958  CG  LEU B 105      -5.745  18.854 -84.294  1.00  0.00           C  
ATOM   3959  CD1 LEU B 105      -4.865  17.710 -83.806  1.00  0.00           C  
ATOM   3960  CD2 LEU B 105      -7.134  18.776 -83.679  1.00  0.00           C  
ATOM   3961  H   LEU B 105      -7.684  21.429 -84.972  1.00  0.00           H  
ATOM   3962  HA  LEU B 105      -4.917  22.250 -84.496  1.00  0.00           H  
ATOM   3963 1HB  LEU B 105      -4.019  20.086 -84.051  1.00  0.00           H  
ATOM   3964 2HB  LEU B 105      -5.298  20.379 -82.868  1.00  0.00           H  
ATOM   3965  HG  LEU B 105      -5.823  18.776 -85.378  1.00  0.00           H  
ATOM   3966 1HD1 LEU B 105      -5.327  16.759 -84.070  1.00  0.00           H  
ATOM   3967 2HD1 LEU B 105      -3.884  17.779 -84.277  1.00  0.00           H  
ATOM   3968 3HD1 LEU B 105      -4.755  17.772 -82.724  1.00  0.00           H  
ATOM   3969 1HD2 LEU B 105      -7.596  17.825 -83.943  1.00  0.00           H  
ATOM   3970 2HD2 LEU B 105      -7.057  18.853 -82.594  1.00  0.00           H  
ATOM   3971 3HD2 LEU B 105      -7.746  19.595 -84.058  1.00  0.00           H  
ATOM   3972  N   SER B 106      -4.342  21.298 -86.801  1.00  0.00           N  
ATOM   3973  CA  SER B 106      -4.211  21.245 -88.246  1.00  0.00           C  
ATOM   3974  C   SER B 106      -3.397  20.043 -88.692  1.00  0.00           C  
ATOM   3975  O   SER B 106      -2.586  19.491 -87.947  1.00  0.00           O  
ATOM   3976  CB  SER B 106      -3.564  22.519 -88.753  1.00  0.00           C  
ATOM   3977  OG  SER B 106      -4.419  23.617 -88.589  1.00  0.00           O  
ATOM   3978  H   SER B 106      -3.524  21.484 -86.240  1.00  0.00           H  
ATOM   3979  HA  SER B 106      -5.207  21.157 -88.681  1.00  0.00           H  
ATOM   3980 1HB  SER B 106      -2.634  22.695 -88.213  1.00  0.00           H  
ATOM   3981 2HB  SER B 106      -3.313  22.404 -89.807  1.00  0.00           H  
ATOM   3982  HG  SER B 106      -4.128  24.276 -89.223  1.00  0.00           H  
ATOM   3983  N   LEU B 107      -3.627  19.658 -89.943  1.00  0.00           N  
ATOM   3984  CA  LEU B 107      -2.879  18.602 -90.605  1.00  0.00           C  
ATOM   3985  C   LEU B 107      -2.301  19.198 -91.876  1.00  0.00           C  
ATOM   3986  O   LEU B 107      -3.044  19.720 -92.713  1.00  0.00           O  
ATOM   3987  CB  LEU B 107      -3.774  17.399 -90.927  1.00  0.00           C  
ATOM   3988  CG  LEU B 107      -3.123  16.291 -91.764  1.00  0.00           C  
ATOM   3989  CD1 LEU B 107      -2.030  15.613 -90.949  1.00  0.00           C  
ATOM   3990  CD2 LEU B 107      -4.185  15.289 -92.195  1.00  0.00           C  
ATOM   3991  H   LEU B 107      -4.363  20.131 -90.448  1.00  0.00           H  
ATOM   3992  HA  LEU B 107      -2.087  18.268 -89.936  1.00  0.00           H  
ATOM   3993 1HB  LEU B 107      -4.107  16.954 -89.990  1.00  0.00           H  
ATOM   3994 2HB  LEU B 107      -4.651  17.753 -91.469  1.00  0.00           H  
ATOM   3995  HG  LEU B 107      -2.658  16.728 -92.648  1.00  0.00           H  
ATOM   3996 1HD1 LEU B 107      -1.568  14.825 -91.544  1.00  0.00           H  
ATOM   3997 2HD1 LEU B 107      -1.275  16.348 -90.671  1.00  0.00           H  
ATOM   3998 3HD1 LEU B 107      -2.464  15.179 -90.049  1.00  0.00           H  
ATOM   3999 1HD2 LEU B 107      -3.723  14.502 -92.791  1.00  0.00           H  
ATOM   4000 2HD2 LEU B 107      -4.650  14.850 -91.312  1.00  0.00           H  
ATOM   4001 3HD2 LEU B 107      -4.944  15.797 -92.790  1.00  0.00           H  
ATOM   4002  N   TRP B 108      -0.988  19.125 -92.029  1.00  0.00           N  
ATOM   4003  CA  TRP B 108      -0.358  19.668 -93.217  1.00  0.00           C  
ATOM   4004  C   TRP B 108       0.959  18.969 -93.470  1.00  0.00           C  
ATOM   4005  O   TRP B 108       1.456  18.238 -92.613  1.00  0.00           O  
ATOM   4006  CB  TRP B 108      -0.129  21.173 -93.071  1.00  0.00           C  
ATOM   4007  CG  TRP B 108       0.963  21.520 -92.105  1.00  0.00           C  
ATOM   4008  CD1 TRP B 108       2.249  21.853 -92.412  1.00  0.00           C  
ATOM   4009  CD2 TRP B 108       0.870  21.573 -90.660  1.00  0.00           C  
ATOM   4010  NE1 TRP B 108       2.959  22.106 -91.265  1.00  0.00           N  
ATOM   4011  CE2 TRP B 108       2.131  21.941 -90.184  1.00  0.00           C  
ATOM   4012  CE3 TRP B 108      -0.167  21.341 -89.748  1.00  0.00           C  
ATOM   4013  CZ2 TRP B 108       2.391  22.082 -88.830  1.00  0.00           C  
ATOM   4014  CZ3 TRP B 108       0.094  21.484 -88.390  1.00  0.00           C  
ATOM   4015  CH2 TRP B 108       1.340  21.846 -87.944  1.00  0.00           C  
ATOM   4016  H   TRP B 108      -0.413  18.692 -91.321  1.00  0.00           H  
ATOM   4017  HA  TRP B 108      -1.020  19.500 -94.067  1.00  0.00           H  
ATOM   4018 1HB  TRP B 108       0.125  21.599 -94.042  1.00  0.00           H  
ATOM   4019 2HB  TRP B 108      -1.049  21.650 -92.734  1.00  0.00           H  
ATOM   4020  HD1 TRP B 108       2.653  21.909 -93.421  1.00  0.00           H  
ATOM   4021  HE1 TRP B 108       3.933  22.370 -91.223  1.00  0.00           H  
ATOM   4022  HE3 TRP B 108      -1.158  21.056 -90.097  1.00  0.00           H  
ATOM   4023  HZ2 TRP B 108       3.374  22.369 -88.455  1.00  0.00           H  
ATOM   4024  HZ3 TRP B 108      -0.719  21.301 -87.687  1.00  0.00           H  
ATOM   4025  HH2 TRP B 108       1.509  21.950 -86.872  1.00  0.00           H  
ATOM   4026  N   ALA B 109       1.521  19.211 -94.643  1.00  0.00           N  
ATOM   4027  CA  ALA B 109       2.772  18.605 -95.064  1.00  0.00           C  
ATOM   4028  C   ALA B 109       3.504  19.549 -96.000  1.00  0.00           C  
ATOM   4029  O   ALA B 109       2.872  20.322 -96.727  1.00  0.00           O  
ATOM   4030  CB  ALA B 109       2.520  17.264 -95.749  1.00  0.00           C  
ATOM   4031  H   ALA B 109       1.049  19.849 -95.268  1.00  0.00           H  
ATOM   4032  HA  ALA B 109       3.385  18.443 -94.177  1.00  0.00           H  
ATOM   4033 1HB  ALA B 109       3.470  16.828 -96.056  1.00  0.00           H  
ATOM   4034 2HB  ALA B 109       2.018  16.590 -95.054  1.00  0.00           H  
ATOM   4035 3HB  ALA B 109       1.891  17.416 -96.624  1.00  0.00           H  
ATOM   4036  N   LYS B 110       4.831  19.473 -95.997  1.00  0.00           N  
ATOM   4037  CA  LYS B 110       5.647  20.270 -96.899  1.00  0.00           C  
ATOM   4038  C   LYS B 110       6.174  19.368 -98.004  1.00  0.00           C  
ATOM   4039  O   LYS B 110       6.565  18.225 -97.751  1.00  0.00           O  
ATOM   4040  CB  LYS B 110       6.800  20.944 -96.153  1.00  0.00           C  
ATOM   4041  CG  LYS B 110       6.371  22.060 -95.209  1.00  0.00           C  
ATOM   4042  CD  LYS B 110       7.572  22.694 -94.523  1.00  0.00           C  
ATOM   4043  CE  LYS B 110       8.530  23.305 -95.534  1.00  0.00           C  
ATOM   4044  NZ  LYS B 110       9.501  24.232 -94.892  1.00  0.00           N  
ATOM   4045  H   LYS B 110       5.284  18.843 -95.350  1.00  0.00           H  
ATOM   4046  HA  LYS B 110       5.020  21.049 -97.335  1.00  0.00           H  
ATOM   4047 1HB  LYS B 110       7.339  20.199 -95.567  1.00  0.00           H  
ATOM   4048 2HB  LYS B 110       7.502  21.365 -96.872  1.00  0.00           H  
ATOM   4049 1HG  LYS B 110       5.837  22.827 -95.771  1.00  0.00           H  
ATOM   4050 2HG  LYS B 110       5.701  21.657 -94.450  1.00  0.00           H  
ATOM   4051 1HD  LYS B 110       7.231  23.474 -93.840  1.00  0.00           H  
ATOM   4052 2HD  LYS B 110       8.103  21.938 -93.945  1.00  0.00           H  
ATOM   4053 1HE  LYS B 110       9.082  22.512 -96.037  1.00  0.00           H  
ATOM   4054 2HE  LYS B 110       7.964  23.856 -96.285  1.00  0.00           H  
ATOM   4055 1HZ  LYS B 110      10.117  24.615 -95.596  1.00  0.00           H  
ATOM   4056 2HZ  LYS B 110       9.000  24.983 -94.438  1.00  0.00           H  
ATOM   4057 3HZ  LYS B 110      10.045  23.728 -94.207  1.00  0.00           H  
ATOM   4058  N   ARG B 111       6.169  19.888 -99.227  1.00  0.00           N  
ATOM   4059  CA  ARG B 111       6.677  19.146-100.371  1.00  0.00           C  
ATOM   4060  C   ARG B 111       8.171  18.878-100.252  1.00  0.00           C  
ATOM   4061  O   ARG B 111       8.977  19.797-100.077  1.00  0.00           O  
ATOM   4062  CB  ARG B 111       6.405  19.908-101.660  1.00  0.00           C  
ATOM   4063  CG  ARG B 111       6.923  19.236-102.922  1.00  0.00           C  
ATOM   4064  CD  ARG B 111       6.114  18.044-103.281  1.00  0.00           C  
ATOM   4065  NE  ARG B 111       6.593  17.410-104.499  1.00  0.00           N  
ATOM   4066  CZ  ARG B 111       6.213  17.758-105.743  1.00  0.00           C  
ATOM   4067  NH1 ARG B 111       5.349  18.734-105.918  1.00  0.00           N  
ATOM   4068  NH2 ARG B 111       6.707  17.118-106.789  1.00  0.00           N  
ATOM   4069  H   ARG B 111       5.804  20.820 -99.367  1.00  0.00           H  
ATOM   4070  HA  ARG B 111       6.162  18.187-100.418  1.00  0.00           H  
ATOM   4071 1HB  ARG B 111       5.332  20.050-101.780  1.00  0.00           H  
ATOM   4072 2HB  ARG B 111       6.861  20.896-101.602  1.00  0.00           H  
ATOM   4073 1HG  ARG B 111       6.883  19.941-103.753  1.00  0.00           H  
ATOM   4074 2HG  ARG B 111       7.954  18.916-102.767  1.00  0.00           H  
ATOM   4075 1HD  ARG B 111       6.164  17.313-102.474  1.00  0.00           H  
ATOM   4076 2HD  ARG B 111       5.077  18.341-103.437  1.00  0.00           H  
ATOM   4077  HE  ARG B 111       7.259  16.654-104.404  1.00  0.00           H  
ATOM   4078 1HH1 ARG B 111       4.971  19.223-105.119  1.00  0.00           H  
ATOM   4079 2HH1 ARG B 111       5.064  18.994-106.851  1.00  0.00           H  
ATOM   4080 1HH2 ARG B 111       7.371  16.367-106.654  1.00  0.00           H  
ATOM   4081 2HH2 ARG B 111       6.422  17.379-107.721  1.00  0.00           H  
ATOM   4082  N   GLN B 112       8.539  17.598-100.345  1.00  0.00           N  
ATOM   4083  CA  GLN B 112       9.921  17.132-100.272  1.00  0.00           C  
ATOM   4084  C   GLN B 112      10.451  16.683-101.625  1.00  0.00           C  
ATOM   4085  O   GLN B 112       9.740  16.666-102.633  1.00  0.00           O  
ATOM   4086  CB  GLN B 112      10.041  15.983 -99.266  1.00  0.00           C  
ATOM   4087  CG  GLN B 112       9.658  16.358 -97.845  1.00  0.00           C  
ATOM   4088  CD  GLN B 112      10.607  17.375 -97.239  1.00  0.00           C  
ATOM   4089  OE1 GLN B 112      11.823  17.167 -97.205  1.00  0.00           O  
ATOM   4090  NE2 GLN B 112      10.056  18.483 -96.757  1.00  0.00           N  
ATOM   4091  H   GLN B 112       7.799  16.923-100.474  1.00  0.00           H  
ATOM   4092  HA  GLN B 112      10.547  17.958 -99.935  1.00  0.00           H  
ATOM   4093 1HB  GLN B 112       9.402  15.157 -99.580  1.00  0.00           H  
ATOM   4094 2HB  GLN B 112      11.067  15.617 -99.253  1.00  0.00           H  
ATOM   4095 1HG  GLN B 112       8.656  16.786 -97.850  1.00  0.00           H  
ATOM   4096 2HG  GLN B 112       9.678  15.461 -97.226  1.00  0.00           H  
ATOM   4097 1HE2 GLN B 112      10.632  19.190 -96.345  1.00  0.00           H  
ATOM   4098 2HE2 GLN B 112       9.066  18.611 -96.804  1.00  0.00           H  
ATOM   4099  N   ASN B 113      11.747  16.343-101.641  1.00  0.00           N  
ATOM   4100  CA  ASN B 113      12.339  15.833-102.872  1.00  0.00           C  
ATOM   4101  C   ASN B 113      11.933  14.391-103.056  1.00  0.00           C  
ATOM   4102  O   ASN B 113      12.006  13.845-104.160  1.00  0.00           O  
ATOM   4103  CB  ASN B 113      13.850  15.973-102.859  1.00  0.00           C  
ATOM   4104  CG  ASN B 113      14.298  17.406-102.942  1.00  0.00           C  
ATOM   4105  OD1 ASN B 113      14.123  18.065-103.974  1.00  0.00           O  
ATOM   4106  ND2 ASN B 113      14.872  17.902-101.876  1.00  0.00           N  
ATOM   4107  H   ASN B 113      12.325  16.433-100.818  1.00  0.00           H  
ATOM   4108  HA  ASN B 113      11.950  16.413-103.710  1.00  0.00           H  
ATOM   4109 1HB  ASN B 113      14.249  15.533-101.944  1.00  0.00           H  
ATOM   4110 2HB  ASN B 113      14.274  15.423-103.699  1.00  0.00           H  
ATOM   4111 1HD2 ASN B 113      15.191  18.850-101.875  1.00  0.00           H  
ATOM   4112 2HD2 ASN B 113      14.993  17.333-101.063  1.00  0.00           H  
ATOM   4113  N   GLY B 114      11.462  13.773-101.984  1.00  0.00           N  
ATOM   4114  CA  GLY B 114      10.847  12.470-102.059  1.00  0.00           C  
ATOM   4115  C   GLY B 114       9.352  12.642-102.203  1.00  0.00           C  
ATOM   4116  O   GLY B 114       8.840  12.971-103.270  1.00  0.00           O  
ATOM   4117  H   GLY B 114      11.536  14.231-101.086  1.00  0.00           H  
ATOM   4118 1HA  GLY B 114      11.259  11.922-102.906  1.00  0.00           H  
ATOM   4119 2HA  GLY B 114      11.087  11.902-101.161  1.00  0.00           H  
ATOM   4120  N   SER B 115       8.637  12.405-101.116  1.00  0.00           N  
ATOM   4121  CA  SER B 115       7.212  12.666-101.196  1.00  0.00           C  
ATOM   4122  C   SER B 115       6.876  13.958-100.484  1.00  0.00           C  
ATOM   4123  O   SER B 115       7.144  15.048-100.988  1.00  0.00           O  
ATOM   4124  CB  SER B 115       6.428  11.519-100.588  1.00  0.00           C  
ATOM   4125  OG  SER B 115       6.667  11.422 -99.211  1.00  0.00           O  
ATOM   4126  H   SER B 115       9.026  12.059-100.250  1.00  0.00           H  
ATOM   4127  HA  SER B 115       6.935  12.759-102.247  1.00  0.00           H  
ATOM   4128 1HB  SER B 115       5.364  11.671-100.765  1.00  0.00           H  
ATOM   4129 2HB  SER B 115       6.711  10.587-101.075  1.00  0.00           H  
ATOM   4130  HG  SER B 115       6.159  10.666 -98.906  1.00  0.00           H  
ATOM   4131  N   VAL B 116       6.334  13.854 -99.282  1.00  0.00           N  
ATOM   4132  CA  VAL B 116       6.006  15.049 -98.531  1.00  0.00           C  
ATOM   4133  C   VAL B 116       6.397  14.774 -97.092  1.00  0.00           C  
ATOM   4134  O   VAL B 116       6.461  13.611 -96.683  1.00  0.00           O  
ATOM   4135  CB  VAL B 116       4.507  15.386 -98.628  1.00  0.00           C  
ATOM   4136  CG1 VAL B 116       4.121  15.686-100.069  1.00  0.00           C  
ATOM   4137  CG2 VAL B 116       3.680  14.233 -98.077  1.00  0.00           C  
ATOM   4138  H   VAL B 116       6.142  12.949 -98.876  1.00  0.00           H  
ATOM   4139  HA  VAL B 116       6.569  15.885 -98.947  1.00  0.00           H  
ATOM   4140  HB  VAL B 116       4.307  16.286 -98.048  1.00  0.00           H  
ATOM   4141 1HG1 VAL B 116       3.057  15.922-100.119  1.00  0.00           H  
ATOM   4142 2HG1 VAL B 116       4.698  16.536-100.430  1.00  0.00           H  
ATOM   4143 3HG1 VAL B 116       4.328  14.815-100.690  1.00  0.00           H  
ATOM   4144 1HG2 VAL B 116       2.621  14.479 -98.149  1.00  0.00           H  
ATOM   4145 2HG2 VAL B 116       3.884  13.331 -98.655  1.00  0.00           H  
ATOM   4146 3HG2 VAL B 116       3.944  14.063 -97.033  1.00  0.00           H  
ATOM   4147  N   LYS B 117       6.656  15.812 -96.303  1.00  0.00           N  
ATOM   4148  CA  LYS B 117       6.904  15.556 -94.893  1.00  0.00           C  
ATOM   4149  C   LYS B 117       5.703  15.934 -94.050  1.00  0.00           C  
ATOM   4150  O   LYS B 117       5.279  17.093 -94.025  1.00  0.00           O  
ATOM   4151  CB  LYS B 117       8.140  16.320 -94.416  1.00  0.00           C  
ATOM   4152  CG  LYS B 117       8.536  16.040 -92.973  1.00  0.00           C  
ATOM   4153  CD  LYS B 117       9.836  16.742 -92.610  1.00  0.00           C  
ATOM   4154  CE  LYS B 117      10.195  16.522 -91.148  1.00  0.00           C  
ATOM   4155  NZ  LYS B 117      11.440  17.241 -90.766  1.00  0.00           N  
ATOM   4156  H   LYS B 117       6.686  16.762 -96.644  1.00  0.00           H  
ATOM   4157  HA  LYS B 117       7.083  14.489 -94.761  1.00  0.00           H  
ATOM   4158 1HB  LYS B 117       8.990  16.069 -95.051  1.00  0.00           H  
ATOM   4159 2HB  LYS B 117       7.965  17.392 -94.513  1.00  0.00           H  
ATOM   4160 1HG  LYS B 117       7.746  16.386 -92.305  1.00  0.00           H  
ATOM   4161 2HG  LYS B 117       8.661  14.966 -92.832  1.00  0.00           H  
ATOM   4162 1HD  LYS B 117      10.643  16.359 -93.235  1.00  0.00           H  
ATOM   4163 2HD  LYS B 117       9.734  17.812 -92.792  1.00  0.00           H  
ATOM   4164 1HE  LYS B 117       9.380  16.872 -90.516  1.00  0.00           H  
ATOM   4165 2HE  LYS B 117      10.335  15.457 -90.964  1.00  0.00           H  
ATOM   4166 1HZ  LYS B 117      11.644  17.070 -89.792  1.00  0.00           H  
ATOM   4167 2HZ  LYS B 117      12.208  16.910 -91.333  1.00  0.00           H  
ATOM   4168 3HZ  LYS B 117      11.316  18.233 -90.914  1.00  0.00           H  
ATOM   4169  N   TRP B 118       5.186  14.939 -93.341  1.00  0.00           N  
ATOM   4170  CA  TRP B 118       3.916  15.020 -92.649  1.00  0.00           C  
ATOM   4171  C   TRP B 118       4.062  15.792 -91.351  1.00  0.00           C  
ATOM   4172  O   TRP B 118       4.972  15.553 -90.559  1.00  0.00           O  
ATOM   4173  CB  TRP B 118       3.372  13.620 -92.361  1.00  0.00           C  
ATOM   4174  CG  TRP B 118       3.017  12.850 -93.597  1.00  0.00           C  
ATOM   4175  CD1 TRP B 118       3.652  11.745 -94.080  1.00  0.00           C  
ATOM   4176  CD2 TRP B 118       1.934  13.124 -94.518  1.00  0.00           C  
ATOM   4177  NE1 TRP B 118       3.044  11.316 -95.233  1.00  0.00           N  
ATOM   4178  CE2 TRP B 118       1.989  12.147 -95.516  1.00  0.00           C  
ATOM   4179  CE3 TRP B 118       0.936  14.106 -94.575  1.00  0.00           C  
ATOM   4180  CZ2 TRP B 118       1.085  12.119 -96.566  1.00  0.00           C  
ATOM   4181  CZ3 TRP B 118       0.029  14.077 -95.627  1.00  0.00           C  
ATOM   4182  CH2 TRP B 118       0.102  13.108 -96.596  1.00  0.00           C  
ATOM   4183  H   TRP B 118       5.721  14.084 -93.289  1.00  0.00           H  
ATOM   4184  HA  TRP B 118       3.207  15.545 -93.290  1.00  0.00           H  
ATOM   4185 1HB  TRP B 118       4.114  13.049 -91.803  1.00  0.00           H  
ATOM   4186 2HB  TRP B 118       2.482  13.696 -91.738  1.00  0.00           H  
ATOM   4187  HD1 TRP B 118       4.517  11.273 -93.618  1.00  0.00           H  
ATOM   4188  HE1 TRP B 118       3.325  10.519 -95.786  1.00  0.00           H  
ATOM   4189  HE3 TRP B 118       0.872  14.876 -93.806  1.00  0.00           H  
ATOM   4190  HZ2 TRP B 118       1.127  11.358 -97.345  1.00  0.00           H  
ATOM   4191  HZ3 TRP B 118      -0.744  14.845 -95.664  1.00  0.00           H  
ATOM   4192  HH2 TRP B 118      -0.626  13.114 -97.408  1.00  0.00           H  
ATOM   4193  N   PHE B 119       3.142  16.731 -91.132  1.00  0.00           N  
ATOM   4194  CA  PHE B 119       3.088  17.464 -89.872  1.00  0.00           C  
ATOM   4195  C   PHE B 119       1.682  17.449 -89.327  1.00  0.00           C  
ATOM   4196  O   PHE B 119       0.718  17.244 -90.070  1.00  0.00           O  
ATOM   4197  CB  PHE B 119       3.555  18.909 -90.058  1.00  0.00           C  
ATOM   4198  CG  PHE B 119       4.936  19.029 -90.637  1.00  0.00           C  
ATOM   4199  CD1 PHE B 119       5.119  19.382 -91.966  1.00  0.00           C  
ATOM   4200  CD2 PHE B 119       6.056  18.790 -89.855  1.00  0.00           C  
ATOM   4201  CE1 PHE B 119       6.389  19.493 -92.500  1.00  0.00           C  
ATOM   4202  CE2 PHE B 119       7.326  18.901 -90.385  1.00  0.00           C  
ATOM   4203  CZ  PHE B 119       7.492  19.253 -91.709  1.00  0.00           C  
ATOM   4204  H   PHE B 119       2.466  16.942 -91.852  1.00  0.00           H  
ATOM   4205  HA  PHE B 119       3.754  16.976 -89.159  1.00  0.00           H  
ATOM   4206 1HB  PHE B 119       2.864  19.433 -90.717  1.00  0.00           H  
ATOM   4207 2HB  PHE B 119       3.543  19.421 -89.097  1.00  0.00           H  
ATOM   4208  HD1 PHE B 119       4.246  19.573 -92.591  1.00  0.00           H  
ATOM   4209  HD2 PHE B 119       5.924  18.511 -88.808  1.00  0.00           H  
ATOM   4210  HE1 PHE B 119       6.517  19.771 -93.545  1.00  0.00           H  
ATOM   4211  HE2 PHE B 119       8.198  18.711 -89.759  1.00  0.00           H  
ATOM   4212  HZ  PHE B 119       8.494  19.340 -92.129  1.00  0.00           H  
ATOM   4213  N   CYS B 120       1.579  17.675 -88.027  1.00  0.00           N  
ATOM   4214  CA  CYS B 120       0.293  17.725 -87.359  1.00  0.00           C  
ATOM   4215  C   CYS B 120       0.492  18.440 -86.034  1.00  0.00           C  
ATOM   4216  O   CYS B 120       1.443  18.153 -85.302  1.00  0.00           O  
ATOM   4217  CB  CYS B 120      -0.273  16.325 -87.124  1.00  0.00           C  
ATOM   4218  SG  CYS B 120      -1.925  16.310 -86.388  1.00  0.00           S  
ATOM   4219  H   CYS B 120       2.420  17.815 -87.486  1.00  0.00           H  
ATOM   4220  HA  CYS B 120      -0.405  18.271 -87.994  1.00  0.00           H  
ATOM   4221 1HB  CYS B 120      -0.321  15.788 -88.072  1.00  0.00           H  
ATOM   4222 2HB  CYS B 120       0.395  15.768 -86.467  1.00  0.00           H  
ATOM   4223  N   GLY B 121      -0.387  19.382 -85.733  1.00  0.00           N  
ATOM   4224  CA  GLY B 121      -0.240  20.106 -84.494  1.00  0.00           C  
ATOM   4225  C   GLY B 121      -1.196  21.268 -84.430  1.00  0.00           C  
ATOM   4226  O   GLY B 121      -2.305  21.220 -84.964  1.00  0.00           O  
ATOM   4227  H   GLY B 121      -1.157  19.608 -86.347  1.00  0.00           H  
ATOM   4228 1HA  GLY B 121      -0.421  19.433 -83.656  1.00  0.00           H  
ATOM   4229 2HA  GLY B 121       0.784  20.465 -84.402  1.00  0.00           H  
ATOM   4230  N   GLN B 122      -0.712  22.334 -83.811  1.00  0.00           N  
ATOM   4231  CA  GLN B 122      -1.468  23.542 -83.535  1.00  0.00           C  
ATOM   4232  C   GLN B 122      -2.183  24.115 -84.744  1.00  0.00           C  
ATOM   4233  O   GLN B 122      -1.773  23.880 -85.889  1.00  0.00           O  
ATOM   4234  CB  GLN B 122      -0.538  24.608 -82.947  1.00  0.00           C  
ATOM   4235  CG  GLN B 122      -0.005  24.274 -81.564  1.00  0.00           C  
ATOM   4236  CD  GLN B 122      -1.081  24.342 -80.497  1.00  0.00           C  
ATOM   4237  OE1 GLN B 122      -2.277  24.351 -80.802  1.00  0.00           O  
ATOM   4238  NE2 GLN B 122      -0.662  24.390 -79.238  1.00  0.00           N  
ATOM   4239  H   GLN B 122       0.253  22.280 -83.519  1.00  0.00           H  
ATOM   4240  HA  GLN B 122      -2.244  23.306 -82.807  1.00  0.00           H  
ATOM   4241 1HB  GLN B 122       0.314  24.753 -83.611  1.00  0.00           H  
ATOM   4242 2HB  GLN B 122      -1.069  25.558 -82.883  1.00  0.00           H  
ATOM   4243 1HG  GLN B 122       0.400  23.263 -81.577  1.00  0.00           H  
ATOM   4244 2HG  GLN B 122       0.778  24.987 -81.306  1.00  0.00           H  
ATOM   4245 1HE2 GLN B 122      -1.327  24.436 -78.491  1.00  0.00           H  
ATOM   4246 2HE2 GLN B 122       0.317  24.380 -79.036  1.00  0.00           H  
ATOM   4247  N   PRO B 123      -3.278  24.833 -84.527  1.00  0.00           N  
ATOM   4248  CA  PRO B 123      -3.983  25.482 -85.628  1.00  0.00           C  
ATOM   4249  C   PRO B 123      -3.025  26.346 -86.425  1.00  0.00           C  
ATOM   4250  O   PRO B 123      -2.436  27.294 -85.906  1.00  0.00           O  
ATOM   4251  CB  PRO B 123      -5.051  26.321 -84.920  1.00  0.00           C  
ATOM   4252  CG  PRO B 123      -5.281  25.609 -83.631  1.00  0.00           C  
ATOM   4253  CD  PRO B 123      -3.917  25.118 -83.226  1.00  0.00           C  
ATOM   4254  HA  PRO B 123      -4.448  24.713 -86.263  1.00  0.00           H  
ATOM   4255 1HB  PRO B 123      -4.689  27.350 -84.780  1.00  0.00           H  
ATOM   4256 2HB  PRO B 123      -5.956  26.381 -85.542  1.00  0.00           H  
ATOM   4257 1HG  PRO B 123      -5.721  26.294 -82.892  1.00  0.00           H  
ATOM   4258 2HG  PRO B 123      -6.001  24.790 -83.773  1.00  0.00           H  
ATOM   4259 1HD  PRO B 123      -3.389  25.911 -82.676  1.00  0.00           H  
ATOM   4260 2HD  PRO B 123      -4.021  24.216 -82.604  1.00  0.00           H  
ATOM   4261  N   VAL B 124      -2.831  25.975 -87.683  1.00  0.00           N  
ATOM   4262  CA  VAL B 124      -2.041  26.735 -88.635  1.00  0.00           C  
ATOM   4263  C   VAL B 124      -2.786  26.685 -89.959  1.00  0.00           C  
ATOM   4264  O   VAL B 124      -3.569  25.761 -90.203  1.00  0.00           O  
ATOM   4265  CB  VAL B 124      -0.625  26.149 -88.790  1.00  0.00           C  
ATOM   4266  CG1 VAL B 124       0.125  26.213 -87.468  1.00  0.00           C  
ATOM   4267  CG2 VAL B 124      -0.710  24.717 -89.294  1.00  0.00           C  
ATOM   4268  H   VAL B 124      -3.264  25.112 -87.981  1.00  0.00           H  
ATOM   4269  HA  VAL B 124      -1.947  27.758 -88.267  1.00  0.00           H  
ATOM   4270  HB  VAL B 124      -0.068  26.754 -89.505  1.00  0.00           H  
ATOM   4271 1HG1 VAL B 124       1.124  25.794 -87.596  1.00  0.00           H  
ATOM   4272 2HG1 VAL B 124       0.205  27.250 -87.144  1.00  0.00           H  
ATOM   4273 3HG1 VAL B 124      -0.415  25.637 -86.715  1.00  0.00           H  
ATOM   4274 1HG2 VAL B 124       0.294  24.309 -89.402  1.00  0.00           H  
ATOM   4275 2HG2 VAL B 124      -1.273  24.113 -88.581  1.00  0.00           H  
ATOM   4276 3HG2 VAL B 124      -1.214  24.700 -90.260  1.00  0.00           H  
ATOM   4277  N   THR B 125      -2.546  27.661 -90.833  1.00  0.00           N  
ATOM   4278  CA  THR B 125      -3.066  27.601 -92.188  1.00  0.00           C  
ATOM   4279  C   THR B 125      -1.981  27.989 -93.171  1.00  0.00           C  
ATOM   4280  O   THR B 125      -1.100  28.780 -92.849  1.00  0.00           O  
ATOM   4281  CB  THR B 125      -4.290  28.519 -92.365  1.00  0.00           C  
ATOM   4282  OG1 THR B 125      -3.902  29.882 -92.151  1.00  0.00           O  
ATOM   4283  CG2 THR B 125      -5.384  28.146 -91.377  1.00  0.00           C  
ATOM   4284  H   THR B 125      -1.993  28.458 -90.553  1.00  0.00           H  
ATOM   4285  HA  THR B 125      -3.378  26.576 -92.393  1.00  0.00           H  
ATOM   4286  HB  THR B 125      -4.675  28.420 -93.379  1.00  0.00           H  
ATOM   4287  HG1 THR B 125      -3.476  30.221 -92.942  1.00  0.00           H  
ATOM   4288 1HG2 THR B 125      -6.241  28.805 -91.517  1.00  0.00           H  
ATOM   4289 2HG2 THR B 125      -5.689  27.113 -91.544  1.00  0.00           H  
ATOM   4290 3HG2 THR B 125      -5.008  28.252 -90.360  1.00  0.00           H  
ATOM   4291  N   ARG B 126      -2.074  27.461 -94.382  1.00  0.00           N  
ATOM   4292  CA  ARG B 126      -1.035  27.745 -95.349  1.00  0.00           C  
ATOM   4293  C   ARG B 126      -1.227  29.117 -95.959  1.00  0.00           C  
ATOM   4294  O   ARG B 126      -2.352  29.574 -96.181  1.00  0.00           O  
ATOM   4295  CB  ARG B 126      -0.978  26.670 -96.423  1.00  0.00           C  
ATOM   4296  CG  ARG B 126       0.027  26.948 -97.477  1.00  0.00           C  
ATOM   4297  CD  ARG B 126       0.174  25.747 -98.351  1.00  0.00           C  
ATOM   4298  NE  ARG B 126       0.986  24.743 -97.679  1.00  0.00           N  
ATOM   4299  CZ  ARG B 126       0.524  23.590 -97.211  1.00  0.00           C  
ATOM   4300  NH1 ARG B 126      -0.752  23.295 -97.339  1.00  0.00           N  
ATOM   4301  NH2 ARG B 126       1.337  22.731 -96.614  1.00  0.00           N  
ATOM   4302  H   ARG B 126      -2.846  26.868 -94.650  1.00  0.00           H  
ATOM   4303  HA  ARG B 126      -0.071  27.720 -94.840  1.00  0.00           H  
ATOM   4304 1HB  ARG B 126      -0.742  25.711 -95.965  1.00  0.00           H  
ATOM   4305 2HB  ARG B 126      -1.956  26.576 -96.895  1.00  0.00           H  
ATOM   4306 1HG  ARG B 126      -0.300  27.797 -98.077  1.00  0.00           H  
ATOM   4307 2HG  ARG B 126       0.986  27.180 -97.013  1.00  0.00           H  
ATOM   4308 1HD  ARG B 126      -0.809  25.330 -98.565  1.00  0.00           H  
ATOM   4309 2HD  ARG B 126       0.658  26.034 -99.285  1.00  0.00           H  
ATOM   4310  HE  ARG B 126       1.971  24.938 -97.561  1.00  0.00           H  
ATOM   4311 1HH1 ARG B 126      -1.377  23.946 -97.794  1.00  0.00           H  
ATOM   4312 2HH1 ARG B 126      -1.106  22.419 -96.984  1.00  0.00           H  
ATOM   4313 1HH2 ARG B 126       2.319  22.951 -96.512  1.00  0.00           H  
ATOM   4314 2HH2 ARG B 126       0.977  21.857 -96.261  1.00  0.00           H  
ATOM   4315  N   THR B 127      -0.101  29.786 -96.198  1.00  0.00           N  
ATOM   4316  CA  THR B 127      -0.117  31.180 -96.622  1.00  0.00           C  
ATOM   4317  C   THR B 127      -0.636  31.298 -98.042  1.00  0.00           C  
ATOM   4318  O   THR B 127      -1.618  32.004 -98.301  1.00  0.00           O  
ATOM   4319  CB  THR B 127       1.284  31.812 -96.527  1.00  0.00           C  
ATOM   4320  OG1 THR B 127       1.777  31.685 -95.187  1.00  0.00           O  
ATOM   4321  CG2 THR B 127       1.232  33.284 -96.907  1.00  0.00           C  
ATOM   4322  H   THR B 127       0.786  29.317 -96.083  1.00  0.00           H  
ATOM   4323  HA  THR B 127      -0.787  31.734 -95.964  1.00  0.00           H  
ATOM   4324  HB  THR B 127       1.964  31.292 -97.201  1.00  0.00           H  
ATOM   4325  HG1 THR B 127       2.149  30.808 -95.065  1.00  0.00           H  
ATOM   4326 1HG2 THR B 127       2.230  33.714 -96.834  1.00  0.00           H  
ATOM   4327 2HG2 THR B 127       0.867  33.383 -97.929  1.00  0.00           H  
ATOM   4328 3HG2 THR B 127       0.560  33.811 -96.230  1.00  0.00           H  
ATOM   4329  N   THR B 128       0.001  30.616 -98.978  1.00  0.00           N  
ATOM   4330  CA  THR B 128      -0.445  30.635-100.354  1.00  0.00           C  
ATOM   4331  C   THR B 128      -0.582  29.211-100.857  1.00  0.00           C  
ATOM   4332  O   THR B 128      -0.163  28.249-100.209  1.00  0.00           O  
ATOM   4333  CB  THR B 128       0.524  31.425-101.252  1.00  0.00           C  
ATOM   4334  OG1 THR B 128       1.762  30.711-101.368  1.00  0.00           O  
ATOM   4335  CG2 THR B 128       0.791  32.803-100.667  1.00  0.00           C  
ATOM   4336  H   THR B 128       0.814  30.071 -98.731  1.00  0.00           H  
ATOM   4337  HA  THR B 128      -1.420  31.123-100.395  1.00  0.00           H  
ATOM   4338  HB  THR B 128       0.091  31.537-102.246  1.00  0.00           H  
ATOM   4339  HG1 THR B 128       2.043  30.707-102.286  1.00  0.00           H  
ATOM   4340 1HG2 THR B 128       1.478  33.347-101.315  1.00  0.00           H  
ATOM   4341 2HG2 THR B 128      -0.147  33.353-100.588  1.00  0.00           H  
ATOM   4342 3HG2 THR B 128       1.234  32.698 -99.677  1.00  0.00           H  
ATOM   4343  N   ALA B 129      -1.186  29.088-102.035  1.00  0.00           N  
ATOM   4344  CA  ALA B 129      -1.331  27.777-102.652  1.00  0.00           C  
ATOM   4345  C   ALA B 129      -0.011  27.328-103.259  1.00  0.00           C  
ATOM   4346  O   ALA B 129       0.169  26.146-103.565  1.00  0.00           O  
ATOM   4347  CB  ALA B 129      -2.437  27.827-103.706  1.00  0.00           C  
ATOM   4348  H   ALA B 129      -1.550  29.899-102.513  1.00  0.00           H  
ATOM   4349  HA  ALA B 129      -1.610  27.066-101.874  1.00  0.00           H  
ATOM   4350 1HB  ALA B 129      -2.545  26.845-104.167  1.00  0.00           H  
ATOM   4351 2HB  ALA B 129      -3.377  28.111-103.234  1.00  0.00           H  
ATOM   4352 3HB  ALA B 129      -2.179  28.560-104.469  1.00  0.00           H  
ATOM   4353  N   THR B 130       0.928  28.262-103.413  1.00  0.00           N  
ATOM   4354  CA  THR B 130       2.237  27.930-103.956  1.00  0.00           C  
ATOM   4355  C   THR B 130       3.245  27.666-102.853  1.00  0.00           C  
ATOM   4356  O   THR B 130       4.227  26.950-103.068  1.00  0.00           O  
ATOM   4357  CB  THR B 130       2.757  29.055-104.870  1.00  0.00           C  
ATOM   4358  OG1 THR B 130       2.905  30.262-104.111  1.00  0.00           O  
ATOM   4359  CG2 THR B 130       1.792  29.298-106.019  1.00  0.00           C  
ATOM   4360  H   THR B 130       0.732  29.217-103.149  1.00  0.00           H  
ATOM   4361  HA  THR B 130       2.145  27.020-104.549  1.00  0.00           H  
ATOM   4362  HB  THR B 130       3.730  28.774-105.273  1.00  0.00           H  
ATOM   4363  HG1 THR B 130       3.821  30.549-104.142  1.00  0.00           H  
ATOM   4364 1HG2 THR B 130       2.176  30.095-106.655  1.00  0.00           H  
ATOM   4365 2HG2 THR B 130       1.686  28.385-106.605  1.00  0.00           H  
ATOM   4366 3HG2 THR B 130       0.820  29.588-105.622  1.00  0.00           H  
ATOM   4367  N   ALA B 131       3.004  28.209-101.664  1.00  0.00           N  
ATOM   4368  CA  ALA B 131       3.885  27.979-100.533  1.00  0.00           C  
ATOM   4369  C   ALA B 131       3.675  26.596 -99.941  1.00  0.00           C  
ATOM   4370  O   ALA B 131       2.692  25.912-100.220  1.00  0.00           O  
ATOM   4371  CB  ALA B 131       3.645  29.029 -99.444  1.00  0.00           C  
ATOM   4372  H   ALA B 131       2.190  28.794-101.543  1.00  0.00           H  
ATOM   4373  HA  ALA B 131       4.914  28.037-100.888  1.00  0.00           H  
ATOM   4374 1HB  ALA B 131       4.314  28.842 -98.604  1.00  0.00           H  
ATOM   4375 2HB  ALA B 131       3.839  30.023 -99.848  1.00  0.00           H  
ATOM   4376 3HB  ALA B 131       2.612  28.971 -99.105  1.00  0.00           H  
ATOM   4377  N   THR B 132       4.651  26.180 -99.142  1.00  0.00           N  
ATOM   4378  CA  THR B 132       4.560  24.949 -98.371  1.00  0.00           C  
ATOM   4379  C   THR B 132       4.498  25.273 -96.884  1.00  0.00           C  
ATOM   4380  O   THR B 132       3.957  24.493 -96.096  1.00  0.00           O  
ATOM   4381  CB  THR B 132       5.750  24.016 -98.659  1.00  0.00           C  
ATOM   4382  OG1 THR B 132       6.975  24.686 -98.335  1.00  0.00           O  
ATOM   4383  CG2 THR B 132       5.770  23.612-100.125  1.00  0.00           C  
ATOM   4384  H   THR B 132       5.486  26.744 -99.072  1.00  0.00           H  
ATOM   4385  HA  THR B 132       3.644  24.430 -98.656  1.00  0.00           H  
ATOM   4386  HB  THR B 132       5.667  23.121 -98.042  1.00  0.00           H  
ATOM   4387  HG1 THR B 132       6.806  25.356 -97.668  1.00  0.00           H  
ATOM   4388 1HG2 THR B 132       6.617  22.952-100.309  1.00  0.00           H  
ATOM   4389 2HG2 THR B 132       4.844  23.092-100.371  1.00  0.00           H  
ATOM   4390 3HG2 THR B 132       5.862  24.502-100.746  1.00  0.00           H  
ATOM   4391  N   ASP B 133       5.006  26.447 -96.493  1.00  0.00           N  
ATOM   4392  CA  ASP B 133       5.001  26.868 -95.099  1.00  0.00           C  
ATOM   4393  C   ASP B 133       3.624  27.362 -94.674  1.00  0.00           C  
ATOM   4394  O   ASP B 133       2.823  27.839 -95.480  1.00  0.00           O  
ATOM   4395  CB  ASP B 133       6.038  27.971 -94.869  1.00  0.00           C  
ATOM   4396  CG  ASP B 133       7.470  27.454 -94.902  1.00  0.00           C  
ATOM   4397  OD1 ASP B 133       7.660  26.277 -94.706  1.00  0.00           O  
ATOM   4398  OD2 ASP B 133       8.359  28.241 -95.123  1.00  0.00           O  
ATOM   4399  H   ASP B 133       5.405  27.059 -97.191  1.00  0.00           H  
ATOM   4400  HA  ASP B 133       5.260  26.011 -94.477  1.00  0.00           H  
ATOM   4401 1HB  ASP B 133       5.927  28.740 -95.634  1.00  0.00           H  
ATOM   4402 2HB  ASP B 133       5.859  28.442 -93.902  1.00  0.00           H  
ATOM   4403  N   VAL B 134       3.363  27.261 -93.372  1.00  0.00           N  
ATOM   4404  CA  VAL B 134       2.068  27.631 -92.833  1.00  0.00           C  
ATOM   4405  C   VAL B 134       2.250  28.730 -91.800  1.00  0.00           C  
ATOM   4406  O   VAL B 134       3.299  28.848 -91.162  1.00  0.00           O  
ATOM   4407  CB  VAL B 134       1.378  26.414 -92.188  1.00  0.00           C  
ATOM   4408  CG1 VAL B 134       1.095  25.346 -93.234  1.00  0.00           C  
ATOM   4409  CG2 VAL B 134       2.247  25.858 -91.070  1.00  0.00           C  
ATOM   4410  H   VAL B 134       4.078  26.921 -92.745  1.00  0.00           H  
ATOM   4411  HA  VAL B 134       1.443  27.990 -93.651  1.00  0.00           H  
ATOM   4412  HB  VAL B 134       0.417  26.727 -91.781  1.00  0.00           H  
ATOM   4413 1HG1 VAL B 134       0.607  24.494 -92.761  1.00  0.00           H  
ATOM   4414 2HG1 VAL B 134       0.442  25.755 -94.005  1.00  0.00           H  
ATOM   4415 3HG1 VAL B 134       2.032  25.021 -93.685  1.00  0.00           H  
ATOM   4416 1HG2 VAL B 134       1.753  24.999 -90.618  1.00  0.00           H  
ATOM   4417 2HG2 VAL B 134       3.210  25.550 -91.477  1.00  0.00           H  
ATOM   4418 3HG2 VAL B 134       2.402  26.627 -90.313  1.00  0.00           H  
ATOM   4419  N   ALA B 135       1.222  29.557 -91.660  1.00  0.00           N  
ATOM   4420  CA  ALA B 135       1.197  30.628 -90.681  1.00  0.00           C  
ATOM   4421  C   ALA B 135       0.495  30.165 -89.417  1.00  0.00           C  
ATOM   4422  O   ALA B 135      -0.403  29.323 -89.467  1.00  0.00           O  
ATOM   4423  CB  ALA B 135       0.491  31.858 -91.246  1.00  0.00           C  
ATOM   4424  H   ALA B 135       0.425  29.426 -92.267  1.00  0.00           H  
ATOM   4425  HA  ALA B 135       2.227  30.882 -90.430  1.00  0.00           H  
ATOM   4426 1HB  ALA B 135       0.483  32.649 -90.497  1.00  0.00           H  
ATOM   4427 2HB  ALA B 135       1.020  32.204 -92.135  1.00  0.00           H  
ATOM   4428 3HB  ALA B 135      -0.532  31.599 -91.512  1.00  0.00           H  
ATOM   4429  N   ALA B 136       0.895  30.746 -88.293  1.00  0.00           N  
ATOM   4430  CA  ALA B 136       0.373  30.355 -86.994  1.00  0.00           C  
ATOM   4431  C   ALA B 136      -1.001  30.967 -86.783  1.00  0.00           C  
ATOM   4432  O   ALA B 136      -1.159  31.888 -85.981  1.00  0.00           O  
ATOM   4433  CB  ALA B 136       1.324  30.789 -85.886  1.00  0.00           C  
ATOM   4434  H   ALA B 136       1.584  31.483 -88.345  1.00  0.00           H  
ATOM   4435  HA  ALA B 136       0.276  29.269 -86.981  1.00  0.00           H  
ATOM   4436 1HB  ALA B 136       0.919  30.488 -84.920  1.00  0.00           H  
ATOM   4437 2HB  ALA B 136       2.295  30.316 -86.035  1.00  0.00           H  
ATOM   4438 3HB  ALA B 136       1.440  31.871 -85.910  1.00  0.00           H  
ATOM   4439  N   ALA B 137      -2.001  30.466 -87.500  1.00  0.00           N  
ATOM   4440  CA  ALA B 137      -3.371  30.936 -87.346  1.00  0.00           C  
ATOM   4441  C   ALA B 137      -3.929  30.237 -86.118  1.00  0.00           C  
ATOM   4442  O   ALA B 137      -4.771  29.340 -86.240  1.00  0.00           O  
ATOM   4443  CB  ALA B 137      -4.205  30.637 -88.589  1.00  0.00           C  
ATOM   4444  H   ALA B 137      -1.803  29.737 -88.172  1.00  0.00           H  
ATOM   4445  HA  ALA B 137      -3.344  32.015 -87.199  1.00  0.00           H  
ATOM   4446 1HB  ALA B 137      -5.222  31.001 -88.441  1.00  0.00           H  
ATOM   4447 2HB  ALA B 137      -3.763  31.136 -89.452  1.00  0.00           H  
ATOM   4448 3HB  ALA B 137      -4.226  29.563 -88.763  1.00  0.00           H  
ATOM   4449  N   ASN B 138      -3.487  30.661 -84.937  1.00  0.00           N  
ATOM   4450  CA  ASN B 138      -3.835  29.968 -83.709  1.00  0.00           C  
ATOM   4451  C   ASN B 138      -5.224  30.299 -83.188  1.00  0.00           C  
ATOM   4452  O   ASN B 138      -5.584  29.824 -82.102  1.00  0.00           O  
ATOM   4453  CB  ASN B 138      -2.797  30.263 -82.641  1.00  0.00           C  
ATOM   4454  CG  ASN B 138      -2.809  31.702 -82.206  1.00  0.00           C  
ATOM   4455  OD1 ASN B 138      -3.862  32.350 -82.190  1.00  0.00           O  
ATOM   4456  ND2 ASN B 138      -1.658  32.216 -81.854  1.00  0.00           N  
ATOM   4457  H   ASN B 138      -2.897  31.479 -84.890  1.00  0.00           H  
ATOM   4458  HA  ASN B 138      -3.844  28.895 -83.907  1.00  0.00           H  
ATOM   4459 1HB  ASN B 138      -2.980  29.631 -81.771  1.00  0.00           H  
ATOM   4460 2HB  ASN B 138      -1.805  30.019 -83.021  1.00  0.00           H  
ATOM   4461 1HD2 ASN B 138      -1.606  33.169 -81.555  1.00  0.00           H  
ATOM   4462 2HD2 ASN B 138      -0.831  31.655 -81.883  1.00  0.00           H  
ATOM   4463  N   GLY B 139      -5.999  31.092 -83.923  1.00  0.00           N  
ATOM   4464  CA  GLY B 139      -7.359  31.405 -83.530  1.00  0.00           C  
ATOM   4465  C   GLY B 139      -7.406  32.313 -82.325  1.00  0.00           C  
ATOM   4466  O   GLY B 139      -8.218  32.127 -81.416  1.00  0.00           O  
ATOM   4467  H   GLY B 139      -5.631  31.487 -84.776  1.00  0.00           H  
ATOM   4468 1HA  GLY B 139      -7.877  31.883 -84.361  1.00  0.00           H  
ATOM   4469 2HA  GLY B 139      -7.893  30.483 -83.305  1.00  0.00           H  
ATOM   4470  N   LYS B 140      -6.507  33.292 -82.309  1.00  0.00           N  
ATOM   4471  CA  LYS B 140      -6.415  34.255 -81.221  1.00  0.00           C  
ATOM   4472  C   LYS B 140      -6.335  33.550 -79.879  1.00  0.00           C  
ATOM   4473  O   LYS B 140      -6.929  33.971 -78.886  1.00  0.00           O  
ATOM   4474  CB  LYS B 140      -7.609  35.210 -81.245  1.00  0.00           C  
ATOM   4475  CG  LYS B 140      -7.729  36.036 -82.519  1.00  0.00           C  
ATOM   4476  CD  LYS B 140      -8.897  37.007 -82.440  1.00  0.00           C  
ATOM   4477  CE  LYS B 140      -9.040  37.808 -83.726  1.00  0.00           C  
ATOM   4478  NZ  LYS B 140     -10.200  38.739 -83.675  1.00  0.00           N  
ATOM   4479  H   LYS B 140      -5.866  33.365 -83.086  1.00  0.00           H  
ATOM   4480  HA  LYS B 140      -5.501  34.837 -81.351  1.00  0.00           H  
ATOM   4481 1HB  LYS B 140      -8.532  34.642 -81.126  1.00  0.00           H  
ATOM   4482 2HB  LYS B 140      -7.539  35.900 -80.404  1.00  0.00           H  
ATOM   4483 1HG  LYS B 140      -6.808  36.600 -82.675  1.00  0.00           H  
ATOM   4484 2HG  LYS B 140      -7.876  35.372 -83.370  1.00  0.00           H  
ATOM   4485 1HD  LYS B 140      -9.820  36.453 -82.262  1.00  0.00           H  
ATOM   4486 2HD  LYS B 140      -8.742  37.696 -81.610  1.00  0.00           H  
ATOM   4487 1HE  LYS B 140      -8.133  38.386 -83.896  1.00  0.00           H  
ATOM   4488 2HE  LYS B 140      -9.173  37.127 -84.566  1.00  0.00           H  
ATOM   4489 1HZ  LYS B 140     -10.260  39.250 -84.545  1.00  0.00           H  
ATOM   4490 2HZ  LYS B 140     -11.050  38.211 -83.536  1.00  0.00           H  
ATOM   4491 3HZ  LYS B 140     -10.078  39.388 -82.912  1.00  0.00           H  
ATOM   4492  N   THR B 141      -5.600  32.445 -79.866  1.00  0.00           N  
ATOM   4493  CA  THR B 141      -5.371  31.614 -78.695  1.00  0.00           C  
ATOM   4494  C   THR B 141      -6.595  30.823 -78.270  1.00  0.00           C  
ATOM   4495  O   THR B 141      -6.485  29.943 -77.412  1.00  0.00           O  
ATOM   4496  CB  THR B 141      -4.891  32.472 -77.511  1.00  0.00           C  
ATOM   4497  OG1 THR B 141      -6.001  33.187 -76.954  1.00  0.00           O  
ATOM   4498  CG2 THR B 141      -3.831  33.464 -77.966  1.00  0.00           C  
ATOM   4499  H   THR B 141      -5.179  32.182 -80.746  1.00  0.00           H  
ATOM   4500  HA  THR B 141      -4.596  30.885 -78.934  1.00  0.00           H  
ATOM   4501  HB  THR B 141      -4.469  31.826 -76.741  1.00  0.00           H  
ATOM   4502  HG1 THR B 141      -6.787  33.017 -77.480  1.00  0.00           H  
ATOM   4503 1HG2 THR B 141      -3.503  34.062 -77.115  1.00  0.00           H  
ATOM   4504 2HG2 THR B 141      -2.980  32.923 -78.379  1.00  0.00           H  
ATOM   4505 3HG2 THR B 141      -4.249  34.119 -78.729  1.00  0.00           H  
ATOM   4506  N   ASP B 142      -7.778  31.112 -78.820  1.00  0.00           N  
ATOM   4507  CA  ASP B 142      -8.953  30.366 -78.373  1.00  0.00           C  
ATOM   4508  C   ASP B 142      -8.947  28.991 -79.020  1.00  0.00           C  
ATOM   4509  O   ASP B 142      -9.275  27.993 -78.377  1.00  0.00           O  
ATOM   4510  CB  ASP B 142     -10.246  31.107 -78.725  1.00  0.00           C  
ATOM   4511  CG  ASP B 142     -10.440  32.379 -77.910  1.00  0.00           C  
ATOM   4512  OD1 ASP B 142      -9.795  32.516 -76.897  1.00  0.00           O  
ATOM   4513  OD2 ASP B 142     -11.230  33.201 -78.308  1.00  0.00           O  
ATOM   4514  H   ASP B 142      -7.886  31.823 -79.529  1.00  0.00           H  
ATOM   4515  HA  ASP B 142      -8.904  30.259 -77.289  1.00  0.00           H  
ATOM   4516 1HB  ASP B 142     -10.239  31.368 -79.783  1.00  0.00           H  
ATOM   4517 2HB  ASP B 142     -11.099  30.450 -78.555  1.00  0.00           H  
ATOM   4518  N   ASP B 143      -8.527  28.922 -80.284  1.00  0.00           N  
ATOM   4519  CA  ASP B 143      -8.411  27.627 -80.927  1.00  0.00           C  
ATOM   4520  C   ASP B 143      -7.110  26.939 -80.564  1.00  0.00           C  
ATOM   4521  O   ASP B 143      -6.990  25.726 -80.757  1.00  0.00           O  
ATOM   4522  CB  ASP B 143      -8.507  27.775 -82.447  1.00  0.00           C  
ATOM   4523  CG  ASP B 143      -9.879  28.246 -82.911  1.00  0.00           C  
ATOM   4524  OD1 ASP B 143     -10.824  28.072 -82.179  1.00  0.00           O  
ATOM   4525  OD2 ASP B 143      -9.968  28.774 -83.994  1.00  0.00           O  
ATOM   4526  H   ASP B 143      -8.287  29.753 -80.804  1.00  0.00           H  
ATOM   4527  HA  ASP B 143      -9.232  26.996 -80.585  1.00  0.00           H  
ATOM   4528 1HB  ASP B 143      -7.758  28.490 -82.791  1.00  0.00           H  
ATOM   4529 2HB  ASP B 143      -8.287  26.818 -82.921  1.00  0.00           H  
ATOM   4530  N   LYS B 144      -6.147  27.667 -80.011  1.00  0.00           N  
ATOM   4531  CA  LYS B 144      -4.871  27.042 -79.706  1.00  0.00           C  
ATOM   4532  C   LYS B 144      -5.043  26.061 -78.562  1.00  0.00           C  
ATOM   4533  O   LYS B 144      -5.716  26.347 -77.567  1.00  0.00           O  
ATOM   4534  CB  LYS B 144      -3.817  28.094 -79.355  1.00  0.00           C  
ATOM   4535  CG  LYS B 144      -2.415  27.535 -79.149  1.00  0.00           C  
ATOM   4536  CD  LYS B 144      -1.414  28.645 -78.865  1.00  0.00           C  
ATOM   4537  CE  LYS B 144      -0.016  28.087 -78.642  1.00  0.00           C  
ATOM   4538  NZ  LYS B 144       0.970  29.160 -78.343  1.00  0.00           N  
ATOM   4539  H   LYS B 144      -6.280  28.645 -79.797  1.00  0.00           H  
ATOM   4540  HA  LYS B 144      -4.533  26.497 -80.588  1.00  0.00           H  
ATOM   4541 1HB  LYS B 144      -3.766  28.838 -80.150  1.00  0.00           H  
ATOM   4542 2HB  LYS B 144      -4.109  28.611 -78.441  1.00  0.00           H  
ATOM   4543 1HG  LYS B 144      -2.421  26.839 -78.309  1.00  0.00           H  
ATOM   4544 2HG  LYS B 144      -2.103  26.995 -80.042  1.00  0.00           H  
ATOM   4545 1HD  LYS B 144      -1.390  29.337 -79.708  1.00  0.00           H  
ATOM   4546 2HD  LYS B 144      -1.722  29.194 -77.976  1.00  0.00           H  
ATOM   4547 1HE  LYS B 144      -0.034  27.384 -77.810  1.00  0.00           H  
ATOM   4548 2HE  LYS B 144       0.309  27.551 -79.534  1.00  0.00           H  
ATOM   4549 1HZ  LYS B 144       1.883  28.750 -78.202  1.00  0.00           H  
ATOM   4550 2HZ  LYS B 144       1.009  29.808 -79.117  1.00  0.00           H  
ATOM   4551 3HZ  LYS B 144       0.690  29.652 -77.506  1.00  0.00           H  
ATOM   4552  N   ILE B 145      -4.475  24.887 -78.722  1.00  0.00           N  
ATOM   4553  CA  ILE B 145      -4.626  23.849 -77.723  1.00  0.00           C  
ATOM   4554  C   ILE B 145      -3.471  23.925 -76.741  1.00  0.00           C  
ATOM   4555  O   ILE B 145      -2.326  24.202 -77.126  1.00  0.00           O  
ATOM   4556  CB  ILE B 145      -4.678  22.452 -78.368  1.00  0.00           C  
ATOM   4557  CG1 ILE B 145      -5.939  22.307 -79.225  1.00  0.00           C  
ATOM   4558  CG2 ILE B 145      -4.628  21.370 -77.301  1.00  0.00           C  
ATOM   4559  CD1 ILE B 145      -5.971  21.044 -80.055  1.00  0.00           C  
ATOM   4560  H   ILE B 145      -3.926  24.699 -79.548  1.00  0.00           H  
ATOM   4561  HA  ILE B 145      -5.562  24.013 -77.191  1.00  0.00           H  
ATOM   4562  HB  ILE B 145      -3.827  22.329 -79.037  1.00  0.00           H  
ATOM   4563 1HG1 ILE B 145      -6.818  22.315 -78.582  1.00  0.00           H  
ATOM   4564 2HG1 ILE B 145      -6.020  23.159 -79.900  1.00  0.00           H  
ATOM   4565 1HG2 ILE B 145      -4.667  20.390 -77.775  1.00  0.00           H  
ATOM   4566 2HG2 ILE B 145      -3.704  21.462 -76.733  1.00  0.00           H  
ATOM   4567 3HG2 ILE B 145      -5.480  21.482 -76.629  1.00  0.00           H  
ATOM   4568 1HD1 ILE B 145      -6.894  21.013 -80.635  1.00  0.00           H  
ATOM   4569 2HD1 ILE B 145      -5.116  21.032 -80.733  1.00  0.00           H  
ATOM   4570 3HD1 ILE B 145      -5.926  20.176 -79.399  1.00  0.00           H  
ATOM   4571  N   ASN B 146      -3.783  23.701 -75.468  1.00  0.00           N  
ATOM   4572  CA  ASN B 146      -2.770  23.649 -74.434  1.00  0.00           C  
ATOM   4573  C   ASN B 146      -1.711  22.619 -74.766  1.00  0.00           C  
ATOM   4574  O   ASN B 146      -2.021  21.453 -75.009  1.00  0.00           O  
ATOM   4575  CB  ASN B 146      -3.399  23.356 -73.083  1.00  0.00           C  
ATOM   4576  CG  ASN B 146      -2.435  23.545 -71.945  1.00  0.00           C  
ATOM   4577  OD1 ASN B 146      -1.270  23.141 -72.028  1.00  0.00           O  
ATOM   4578  ND2 ASN B 146      -2.899  24.151 -70.882  1.00  0.00           N  
ATOM   4579  H   ASN B 146      -4.751  23.563 -75.217  1.00  0.00           H  
ATOM   4580  HA  ASN B 146      -2.277  24.621 -74.383  1.00  0.00           H  
ATOM   4581 1HB  ASN B 146      -4.257  24.012 -72.931  1.00  0.00           H  
ATOM   4582 2HB  ASN B 146      -3.765  22.329 -73.068  1.00  0.00           H  
ATOM   4583 1HD2 ASN B 146      -2.303  24.305 -70.093  1.00  0.00           H  
ATOM   4584 2HD2 ASN B 146      -3.849  24.461 -70.858  1.00  0.00           H  
ATOM   4585  N   THR B 147      -0.453  23.056 -74.748  1.00  0.00           N  
ATOM   4586  CA  THR B 147       0.625  22.190 -75.211  1.00  0.00           C  
ATOM   4587  C   THR B 147       0.776  20.982 -74.312  1.00  0.00           C  
ATOM   4588  O   THR B 147       1.282  19.945 -74.751  1.00  0.00           O  
ATOM   4589  CB  THR B 147       1.963  22.950 -75.279  1.00  0.00           C  
ATOM   4590  OG1 THR B 147       2.297  23.453 -73.979  1.00  0.00           O  
ATOM   4591  CG2 THR B 147       1.867  24.110 -76.259  1.00  0.00           C  
ATOM   4592  H   THR B 147      -0.230  23.984 -74.416  1.00  0.00           H  
ATOM   4593  HA  THR B 147       0.380  21.839 -76.213  1.00  0.00           H  
ATOM   4594  HB  THR B 147       2.751  22.271 -75.605  1.00  0.00           H  
ATOM   4595  HG1 THR B 147       2.655  22.741 -73.444  1.00  0.00           H  
ATOM   4596 1HG2 THR B 147       2.822  24.635 -76.294  1.00  0.00           H  
ATOM   4597 2HG2 THR B 147       1.625  23.730 -77.251  1.00  0.00           H  
ATOM   4598 3HG2 THR B 147       1.088  24.797 -75.933  1.00  0.00           H  
ATOM   4599  N   LYS B 148       0.345  21.083 -73.055  1.00  0.00           N  
ATOM   4600  CA  LYS B 148       0.455  19.925 -72.183  1.00  0.00           C  
ATOM   4601  C   LYS B 148      -0.527  18.852 -72.615  1.00  0.00           C  
ATOM   4602  O   LYS B 148      -0.349  17.677 -72.299  1.00  0.00           O  
ATOM   4603  CB  LYS B 148       0.208  20.316 -70.725  1.00  0.00           C  
ATOM   4604  CG  LYS B 148       1.295  21.190 -70.115  1.00  0.00           C  
ATOM   4605  CD  LYS B 148       0.974  21.545 -68.671  1.00  0.00           C  
ATOM   4606  CE  LYS B 148       2.064  22.411 -68.057  1.00  0.00           C  
ATOM   4607  NZ  LYS B 148       1.747  22.793 -66.654  1.00  0.00           N  
ATOM   4608  H   LYS B 148      -0.054  21.937 -72.692  1.00  0.00           H  
ATOM   4609  HA  LYS B 148       1.465  19.523 -72.266  1.00  0.00           H  
ATOM   4610 1HB  LYS B 148      -0.737  20.854 -70.648  1.00  0.00           H  
ATOM   4611 2HB  LYS B 148       0.122  19.415 -70.116  1.00  0.00           H  
ATOM   4612 1HG  LYS B 148       2.248  20.662 -70.147  1.00  0.00           H  
ATOM   4613 2HG  LYS B 148       1.389  22.109 -70.693  1.00  0.00           H  
ATOM   4614 1HD  LYS B 148       0.026  22.084 -68.630  1.00  0.00           H  
ATOM   4615 2HD  LYS B 148       0.877  20.631 -68.085  1.00  0.00           H  
ATOM   4616 1HE  LYS B 148       3.008  21.870 -68.069  1.00  0.00           H  
ATOM   4617 2HE  LYS B 148       2.183  23.319 -68.648  1.00  0.00           H  
ATOM   4618 1HZ  LYS B 148       2.492  23.366 -66.284  1.00  0.00           H  
ATOM   4619 2HZ  LYS B 148       0.881  23.312 -66.633  1.00  0.00           H  
ATOM   4620 3HZ  LYS B 148       1.653  21.959 -66.091  1.00  0.00           H  
ATOM   4621  N   HIS B 149      -1.540  19.229 -73.390  1.00  0.00           N  
ATOM   4622  CA  HIS B 149      -2.542  18.262 -73.814  1.00  0.00           C  
ATOM   4623  C   HIS B 149      -2.388  17.855 -75.268  1.00  0.00           C  
ATOM   4624  O   HIS B 149      -3.337  17.337 -75.860  1.00  0.00           O  
ATOM   4625  CB  HIS B 149      -3.950  18.824 -73.595  1.00  0.00           C  
ATOM   4626  CG  HIS B 149      -4.259  19.132 -72.162  1.00  0.00           C  
ATOM   4627  ND1 HIS B 149      -3.709  20.209 -71.498  1.00  0.00           N  
ATOM   4628  CD2 HIS B 149      -5.057  18.505 -71.267  1.00  0.00           C  
ATOM   4629  CE1 HIS B 149      -4.159  20.230 -70.255  1.00  0.00           C  
ATOM   4630  NE2 HIS B 149      -4.977  19.207 -70.090  1.00  0.00           N  
ATOM   4631  H   HIS B 149      -1.625  20.189 -73.692  1.00  0.00           H  
ATOM   4632  HA  HIS B 149      -2.443  17.352 -73.224  1.00  0.00           H  
ATOM   4633 1HB  HIS B 149      -4.071  19.741 -74.174  1.00  0.00           H  
ATOM   4634 2HB  HIS B 149      -4.689  18.109 -73.956  1.00  0.00           H  
ATOM   4635  HD2 HIS B 149      -5.652  17.609 -71.447  1.00  0.00           H  
ATOM   4636  HE1 HIS B 149      -3.898  20.967 -69.496  1.00  0.00           H  
ATOM   4637  HE2 HIS B 149      -5.468  18.974 -69.239  1.00  0.00           H  
ATOM   4638  N   LEU B 150      -1.267  18.109 -75.846  1.00  0.00           N  
ATOM   4639  CA  LEU B 150      -1.057  17.686 -77.208  1.00  0.00           C  
ATOM   4640  C   LEU B 150      -0.470  16.290 -77.229  1.00  0.00           C  
ATOM   4641  O   LEU B 150       0.347  15.932 -76.382  1.00  0.00           O  
ATOM   4642  CB  LEU B 150      -0.124  18.663 -77.935  1.00  0.00           C  
ATOM   4643  CG  LEU B 150      -0.687  20.070 -78.170  1.00  0.00           C  
ATOM   4644  CD1 LEU B 150       0.394  20.956 -78.774  1.00  0.00           C  
ATOM   4645  CD2 LEU B 150      -1.899  19.986 -79.086  1.00  0.00           C  
ATOM   4646  H   LEU B 150      -0.528  18.600 -75.364  1.00  0.00           H  
ATOM   4647  HA  LEU B 150      -2.019  17.677 -77.720  1.00  0.00           H  
ATOM   4648 1HB  LEU B 150       0.792  18.766 -77.355  1.00  0.00           H  
ATOM   4649 2HB  LEU B 150       0.132  18.242 -78.907  1.00  0.00           H  
ATOM   4650  HG  LEU B 150      -0.983  20.508 -77.217  1.00  0.00           H  
ATOM   4651 1HD1 LEU B 150      -0.006  21.956 -78.941  1.00  0.00           H  
ATOM   4652 2HD1 LEU B 150       1.241  21.015 -78.090  1.00  0.00           H  
ATOM   4653 3HD1 LEU B 150       0.722  20.534 -79.723  1.00  0.00           H  
ATOM   4654 1HD2 LEU B 150      -2.300  20.986 -79.253  1.00  0.00           H  
ATOM   4655 2HD2 LEU B 150      -1.604  19.549 -80.041  1.00  0.00           H  
ATOM   4656 3HD2 LEU B 150      -2.663  19.362 -78.622  1.00  0.00           H  
ATOM   4657  N   PRO B 151      -0.887  15.470 -78.146  1.00  0.00           N  
ATOM   4658  CA  PRO B 151      -0.299  14.133 -78.225  1.00  0.00           C  
ATOM   4659  C   PRO B 151       1.134  14.184 -78.730  1.00  0.00           C  
ATOM   4660  O   PRO B 151       1.598  15.220 -79.219  1.00  0.00           O  
ATOM   4661  CB  PRO B 151      -1.217  13.409 -79.214  1.00  0.00           C  
ATOM   4662  CG  PRO B 151      -1.722  14.492 -80.105  1.00  0.00           C  
ATOM   4663  CD  PRO B 151      -1.914  15.671 -79.188  1.00  0.00           C  
ATOM   4664  HA  PRO B 151      -0.339  13.661 -77.232  1.00  0.00           H  
ATOM   4665 1HB  PRO B 151      -0.651  12.638 -79.758  1.00  0.00           H  
ATOM   4666 2HB  PRO B 151      -2.022  12.892 -78.671  1.00  0.00           H  
ATOM   4667 1HG  PRO B 151      -0.997  14.693 -80.907  1.00  0.00           H  
ATOM   4668 2HG  PRO B 151      -2.657  14.178 -80.592  1.00  0.00           H  
ATOM   4669 1HD  PRO B 151      -1.742  16.602 -79.748  1.00  0.00           H  
ATOM   4670 2HD  PRO B 151      -2.932  15.650 -78.772  1.00  0.00           H  
ATOM   4671  N   SER B 152       1.842  13.066 -78.585  1.00  0.00           N  
ATOM   4672  CA  SER B 152       3.253  13.027 -78.944  1.00  0.00           C  
ATOM   4673  C   SER B 152       3.450  13.206 -80.441  1.00  0.00           C  
ATOM   4674  O   SER B 152       4.536  13.585 -80.886  1.00  0.00           O  
ATOM   4675  CB  SER B 152       3.867  11.714 -78.500  1.00  0.00           C  
ATOM   4676  OG  SER B 152       3.348  10.641 -79.237  1.00  0.00           O  
ATOM   4677  H   SER B 152       1.403  12.231 -78.223  1.00  0.00           H  
ATOM   4678  HA  SER B 152       3.763  13.845 -78.433  1.00  0.00           H  
ATOM   4679 1HB  SER B 152       4.949  11.756 -78.627  1.00  0.00           H  
ATOM   4680 2HB  SER B 152       3.669  11.560 -77.440  1.00  0.00           H  
ATOM   4681  HG  SER B 152       3.613  10.793 -80.147  1.00  0.00           H  
ATOM   4682  N   THR B 153       2.415  12.941 -81.232  1.00  0.00           N  
ATOM   4683  CA  THR B 153       2.552  13.091 -82.677  1.00  0.00           C  
ATOM   4684  C   THR B 153       2.055  14.445 -83.152  1.00  0.00           C  
ATOM   4685  O   THR B 153       2.805  15.204 -83.779  1.00  0.00           O  
ATOM   4686  CB  THR B 153       1.794  11.977 -83.422  1.00  0.00           C  
ATOM   4687  OG1 THR B 153       0.397  12.055 -83.110  1.00  0.00           O  
ATOM   4688  CG2 THR B 153       2.324  10.610 -83.020  1.00  0.00           C  
ATOM   4689  H   THR B 153       1.531  12.636 -80.851  1.00  0.00           H  
ATOM   4690  HA  THR B 153       3.609  13.019 -82.933  1.00  0.00           H  
ATOM   4691  HB  THR B 153       1.920  12.108 -84.497  1.00  0.00           H  
ATOM   4692  HG1 THR B 153      -0.099  12.238 -83.912  1.00  0.00           H  
ATOM   4693 1HG2 THR B 153       1.777   9.835 -83.557  1.00  0.00           H  
ATOM   4694 2HG2 THR B 153       3.384  10.543 -83.266  1.00  0.00           H  
ATOM   4695 3HG2 THR B 153       2.192  10.470 -81.948  1.00  0.00           H  
ATOM   4696  N   CYS B 154       0.807  14.787 -82.835  1.00  0.00           N  
ATOM   4697  CA  CYS B 154       0.199  16.008 -83.353  1.00  0.00           C  
ATOM   4698  C   CYS B 154       0.467  17.121 -82.347  1.00  0.00           C  
ATOM   4699  O   CYS B 154      -0.426  17.590 -81.641  1.00  0.00           O  
ATOM   4700  CB  CYS B 154      -1.305  15.842 -83.567  1.00  0.00           C  
ATOM   4701  SG  CYS B 154      -1.744  14.576 -84.782  1.00  0.00           S  
ATOM   4702  H   CYS B 154       0.267  14.191 -82.223  1.00  0.00           H  
ATOM   4703  HA  CYS B 154       0.654  16.239 -84.317  1.00  0.00           H  
ATOM   4704 1HB  CYS B 154      -1.780  15.580 -82.621  1.00  0.00           H  
ATOM   4705 2HB  CYS B 154      -1.733  16.788 -83.897  1.00  0.00           H  
ATOM   4706  N   ARG B 155       1.714  17.547 -82.296  1.00  0.00           N  
ATOM   4707  CA  ARG B 155       2.146  18.668 -81.490  1.00  0.00           C  
ATOM   4708  C   ARG B 155       3.170  19.511 -82.229  1.00  0.00           C  
ATOM   4709  O   ARG B 155       4.148  19.954 -81.621  1.00  0.00           O  
ATOM   4710  CB  ARG B 155       2.741  18.182 -80.177  1.00  0.00           C  
ATOM   4711  CG  ARG B 155       3.957  17.280 -80.320  1.00  0.00           C  
ATOM   4712  CD  ARG B 155       4.473  16.839 -78.999  1.00  0.00           C  
ATOM   4713  NE  ARG B 155       5.592  15.921 -79.133  1.00  0.00           N  
ATOM   4714  CZ  ARG B 155       6.242  15.350 -78.100  1.00  0.00           C  
ATOM   4715  NH1 ARG B 155       5.872  15.612 -76.866  1.00  0.00           N  
ATOM   4716  NH2 ARG B 155       7.250  14.526 -78.327  1.00  0.00           N  
ATOM   4717  H   ARG B 155       2.394  17.054 -82.857  1.00  0.00           H  
ATOM   4718  HA  ARG B 155       1.278  19.291 -81.269  1.00  0.00           H  
ATOM   4719 1HB  ARG B 155       3.036  19.038 -79.572  1.00  0.00           H  
ATOM   4720 2HB  ARG B 155       1.986  17.630 -79.617  1.00  0.00           H  
ATOM   4721 1HG  ARG B 155       3.687  16.394 -80.896  1.00  0.00           H  
ATOM   4722 2HG  ARG B 155       4.752  17.820 -80.836  1.00  0.00           H  
ATOM   4723 1HD  ARG B 155       4.809  17.706 -78.432  1.00  0.00           H  
ATOM   4724 2HD  ARG B 155       3.680  16.332 -78.450  1.00  0.00           H  
ATOM   4725  HE  ARG B 155       5.906  15.695 -80.068  1.00  0.00           H  
ATOM   4726 1HH1 ARG B 155       5.101  16.241 -76.692  1.00  0.00           H  
ATOM   4727 2HH1 ARG B 155       6.358  15.184 -76.092  1.00  0.00           H  
ATOM   4728 1HH2 ARG B 155       7.535  14.325 -79.276  1.00  0.00           H  
ATOM   4729 2HH2 ARG B 155       7.736  14.099 -77.553  1.00  0.00           H  
ATOM   4730  N   ASP B 156       3.006  19.668 -83.547  1.00  0.00           N  
ATOM   4731  CA  ASP B 156       3.881  20.526 -84.332  1.00  0.00           C  
ATOM   4732  C   ASP B 156       3.406  21.982 -84.314  1.00  0.00           C  
ATOM   4733  O   ASP B 156       2.209  22.269 -84.238  1.00  0.00           O  
ATOM   4734  CB  ASP B 156       3.959  20.025 -85.776  1.00  0.00           C  
ATOM   4735  CG  ASP B 156       4.678  18.689 -85.901  1.00  0.00           C  
ATOM   4736  OD1 ASP B 156       5.647  18.490 -85.207  1.00  0.00           O  
ATOM   4737  OD2 ASP B 156       4.252  17.880 -86.690  1.00  0.00           O  
ATOM   4738  H   ASP B 156       2.254  19.176 -84.009  1.00  0.00           H  
ATOM   4739  HA  ASP B 156       4.880  20.494 -83.895  1.00  0.00           H  
ATOM   4740 1HB  ASP B 156       2.951  19.918 -86.179  1.00  0.00           H  
ATOM   4741 2HB  ASP B 156       4.480  20.761 -86.389  1.00  0.00           H  
ATOM   4742  N   ASP B 157       4.367  22.898 -84.383  1.00  0.00           N  
ATOM   4743  CA  ASP B 157       4.122  24.325 -84.508  1.00  0.00           C  
ATOM   4744  C   ASP B 157       4.241  24.754 -85.962  1.00  0.00           C  
ATOM   4745  O   ASP B 157       4.513  23.941 -86.844  1.00  0.00           O  
ATOM   4746  CB  ASP B 157       5.103  25.122 -83.645  1.00  0.00           C  
ATOM   4747  CG  ASP B 157       6.549  24.970 -84.099  1.00  0.00           C  
ATOM   4748  OD1 ASP B 157       6.761  24.658 -85.247  1.00  0.00           O  
ATOM   4749  OD2 ASP B 157       7.427  25.169 -83.294  1.00  0.00           O  
ATOM   4750  H   ASP B 157       5.319  22.564 -84.346  1.00  0.00           H  
ATOM   4751  HA  ASP B 157       3.109  24.534 -84.162  1.00  0.00           H  
ATOM   4752 1HB  ASP B 157       4.838  26.179 -83.674  1.00  0.00           H  
ATOM   4753 2HB  ASP B 157       5.027  24.793 -82.609  1.00  0.00           H  
ATOM   4754  N   SER B 158       4.061  26.051 -86.196  1.00  0.00           N  
ATOM   4755  CA  SER B 158       3.987  26.602 -87.544  1.00  0.00           C  
ATOM   4756  C   SER B 158       5.336  26.566 -88.234  1.00  0.00           C  
ATOM   4757  O   SER B 158       5.419  26.551 -89.465  1.00  0.00           O  
ATOM   4758  CB  SER B 158       3.476  28.029 -87.498  1.00  0.00           C  
ATOM   4759  OG  SER B 158       4.410  28.877 -86.887  1.00  0.00           O  
ATOM   4760  H   SER B 158       3.973  26.673 -85.404  1.00  0.00           H  
ATOM   4761  HA  SER B 158       3.290  25.998 -88.127  1.00  0.00           H  
ATOM   4762 1HB  SER B 158       3.274  28.376 -88.511  1.00  0.00           H  
ATOM   4763 2HB  SER B 158       2.537  28.062 -86.948  1.00  0.00           H  
ATOM   4764  HG  SER B 158       5.194  28.849 -87.440  1.00  0.00           H  
ATOM   4765  N   SER B 159       6.390  26.521 -87.427  1.00  0.00           N  
ATOM   4766  CA  SER B 159       7.758  26.508 -87.913  1.00  0.00           C  
ATOM   4767  C   SER B 159       8.277  25.108 -88.206  1.00  0.00           C  
ATOM   4768  O   SER B 159       9.423  24.982 -88.657  1.00  0.00           O  
ATOM   4769  CB  SER B 159       8.662  27.180 -86.899  1.00  0.00           C  
ATOM   4770  OG  SER B 159       8.781  26.401 -85.740  1.00  0.00           O  
ATOM   4771  H   SER B 159       6.222  26.496 -86.431  1.00  0.00           H  
ATOM   4772  HA  SER B 159       7.797  27.065 -88.851  1.00  0.00           H  
ATOM   4773 1HB  SER B 159       9.648  27.337 -87.337  1.00  0.00           H  
ATOM   4774 2HB  SER B 159       8.259  28.158 -86.643  1.00  0.00           H  
ATOM   4775  HG  SER B 159       8.146  25.688 -85.833  1.00  0.00           H  
ATOM   4776  N   ALA B 160       7.478  24.072 -87.983  1.00  0.00           N  
ATOM   4777  CA  ALA B 160       7.924  22.716 -88.275  1.00  0.00           C  
ATOM   4778  C   ALA B 160       8.282  22.588 -89.747  1.00  0.00           C  
ATOM   4779  O   ALA B 160       7.511  22.997 -90.618  1.00  0.00           O  
ATOM   4780  CB  ALA B 160       6.845  21.709 -87.895  1.00  0.00           C  
ATOM   4781  H   ALA B 160       6.551  24.215 -87.609  1.00  0.00           H  
ATOM   4782  HA  ALA B 160       8.818  22.520 -87.683  1.00  0.00           H  
ATOM   4783 1HB  ALA B 160       7.194  20.701 -88.119  1.00  0.00           H  
ATOM   4784 2HB  ALA B 160       6.630  21.790 -86.830  1.00  0.00           H  
ATOM   4785 3HB  ALA B 160       5.940  21.914 -88.465  1.00  0.00           H  
ATOM   4786  N   SER B 161       9.442  22.008 -90.016  1.00  0.00           N  
ATOM   4787  CA  SER B 161       9.963  21.913 -91.368  1.00  0.00           C  
ATOM   4788  C   SER B 161      10.760  20.638 -91.620  1.00  0.00           C  
ATOM   4789  O   SER B 161      11.493  20.174 -90.753  1.00  0.00           O  
ATOM   4790  OXT SER B 161      10.674  20.075 -92.676  1.00  0.00           O  
ATOM   4791  CB  SER B 161      10.835  23.118 -91.659  1.00  0.00           C  
ATOM   4792  OG  SER B 161      11.357  23.059 -92.958  1.00  0.00           O  
ATOM   4793  H   SER B 161       9.980  21.622 -89.253  1.00  0.00           H  
ATOM   4794  HA  SER B 161       9.122  21.903 -92.063  1.00  0.00           H  
ATOM   4795 1HB  SER B 161      10.248  24.029 -91.542  1.00  0.00           H  
ATOM   4796 2HB  SER B 161      11.650  23.160 -90.938  1.00  0.00           H  
ATOM   4797  HG  SER B 161      12.281  22.817 -92.861  1.00  0.00           H  
TER    4798      SER B 161 
ATOM   4799  N   PHE C   1      -1.148   5.391 -20.262  1.00  0.00           N  
ATOM   4800  CA  PHE C   1      -2.097   4.772 -21.174  1.00  0.00           C  
ATOM   4801  C   PHE C   1      -1.910   5.314 -22.572  1.00  0.00           C  
ATOM   4802  O   PHE C   1      -2.863   5.503 -23.320  1.00  0.00           O  
ATOM   4803  CB  PHE C   1      -3.535   5.017 -20.713  1.00  0.00           C  
ATOM   4804  CG  PHE C   1      -3.907   4.267 -19.465  1.00  0.00           C  
ATOM   4805  CD1 PHE C   1      -3.750   4.850 -18.216  1.00  0.00           C  
ATOM   4806  CD2 PHE C   1      -4.414   2.979 -19.537  1.00  0.00           C  
ATOM   4807  CE1 PHE C   1      -4.092   4.161 -17.068  1.00  0.00           C  
ATOM   4808  CE2 PHE C   1      -4.758   2.288 -18.391  1.00  0.00           C  
ATOM   4809  CZ  PHE C   1      -4.596   2.881 -17.155  1.00  0.00           C  
ATOM   4810 1H   PHE C   1      -1.282   5.024 -19.341  1.00  0.00           H  
ATOM   4811 2H   PHE C   1      -0.216   5.194 -20.566  1.00  0.00           H  
ATOM   4812 3H   PHE C   1      -1.293   6.380 -20.250  1.00  0.00           H  
ATOM   4813  HA  PHE C   1      -1.916   3.696 -21.185  1.00  0.00           H  
ATOM   4814 1HB  PHE C   1      -3.681   6.080 -20.527  1.00  0.00           H  
ATOM   4815 2HB  PHE C   1      -4.225   4.725 -21.503  1.00  0.00           H  
ATOM   4816  HD1 PHE C   1      -3.352   5.863 -18.147  1.00  0.00           H  
ATOM   4817  HD2 PHE C   1      -4.542   2.511 -20.514  1.00  0.00           H  
ATOM   4818  HE1 PHE C   1      -3.963   4.631 -16.093  1.00  0.00           H  
ATOM   4819  HE2 PHE C   1      -5.156   1.276 -18.462  1.00  0.00           H  
ATOM   4820  HZ  PHE C   1      -4.864   2.337 -16.250  1.00  0.00           H  
ATOM   4821  N   THR C   2      -0.655   5.562 -22.928  1.00  0.00           N  
ATOM   4822  CA  THR C   2      -0.392   6.076 -24.260  1.00  0.00           C  
ATOM   4823  C   THR C   2      -0.723   5.014 -25.286  1.00  0.00           C  
ATOM   4824  O   THR C   2      -1.048   5.331 -26.433  1.00  0.00           O  
ATOM   4825  CB  THR C   2       1.073   6.523 -24.417  1.00  0.00           C  
ATOM   4826  OG1 THR C   2       1.327   7.646 -23.563  1.00  0.00           O  
ATOM   4827  CG2 THR C   2       1.360   6.912 -25.859  1.00  0.00           C  
ATOM   4828  H   THR C   2       0.120   5.403 -22.301  1.00  0.00           H  
ATOM   4829  HA  THR C   2      -1.031   6.944 -24.427  1.00  0.00           H  
ATOM   4830  HB  THR C   2       1.735   5.707 -24.128  1.00  0.00           H  
ATOM   4831  HG1 THR C   2       0.591   8.261 -23.617  1.00  0.00           H  
ATOM   4832 1HG2 THR C   2       2.400   7.225 -25.951  1.00  0.00           H  
ATOM   4833 2HG2 THR C   2       1.179   6.057 -26.510  1.00  0.00           H  
ATOM   4834 3HG2 THR C   2       0.708   7.734 -26.151  1.00  0.00           H  
ATOM   4835  N   LEU C   3      -0.615   3.742 -24.890  1.00  0.00           N  
ATOM   4836  CA  LEU C   3      -0.913   2.638 -25.794  1.00  0.00           C  
ATOM   4837  C   LEU C   3      -2.389   2.600 -26.152  1.00  0.00           C  
ATOM   4838  O   LEU C   3      -2.802   1.853 -27.044  1.00  0.00           O  
ATOM   4839  CB  LEU C   3      -0.502   1.305 -25.155  1.00  0.00           C  
ATOM   4840  CG  LEU C   3       0.998   1.130 -24.886  1.00  0.00           C  
ATOM   4841  CD1 LEU C   3       1.240  -0.217 -24.217  1.00  0.00           C  
ATOM   4842  CD2 LEU C   3       1.765   1.236 -26.195  1.00  0.00           C  
ATOM   4843  H   LEU C   3      -0.320   3.539 -23.945  1.00  0.00           H  
ATOM   4844  HA  LEU C   3      -0.341   2.778 -26.710  1.00  0.00           H  
ATOM   4845 1HB  LEU C   3      -1.024   1.200 -24.205  1.00  0.00           H  
ATOM   4846 2HB  LEU C   3      -0.818   0.493 -25.811  1.00  0.00           H  
ATOM   4847  HG  LEU C   3       1.338   1.908 -24.202  1.00  0.00           H  
ATOM   4848 1HD1 LEU C   3       2.306  -0.341 -24.025  1.00  0.00           H  
ATOM   4849 2HD1 LEU C   3       0.696  -0.258 -23.273  1.00  0.00           H  
ATOM   4850 3HD1 LEU C   3       0.894  -1.015 -24.872  1.00  0.00           H  
ATOM   4851 1HD2 LEU C   3       2.831   1.112 -26.004  1.00  0.00           H  
ATOM   4852 2HD2 LEU C   3       1.426   0.457 -26.879  1.00  0.00           H  
ATOM   4853 3HD2 LEU C   3       1.587   2.214 -26.643  1.00  0.00           H  
ATOM   4854  N   ILE C   4      -3.211   3.390 -25.453  1.00  0.00           N  
ATOM   4855  CA  ILE C   4      -4.614   3.462 -25.846  1.00  0.00           C  
ATOM   4856  C   ILE C   4      -4.725   4.242 -27.140  1.00  0.00           C  
ATOM   4857  O   ILE C   4      -5.495   3.882 -28.034  1.00  0.00           O  
ATOM   4858  CB  ILE C   4      -5.476   4.127 -24.757  1.00  0.00           C  
ATOM   4859  CG1 ILE C   4      -5.426   3.310 -23.464  1.00  0.00           C  
ATOM   4860  CG2 ILE C   4      -6.911   4.284 -25.236  1.00  0.00           C  
ATOM   4861  CD1 ILE C   4      -5.902   1.884 -23.624  1.00  0.00           C  
ATOM   4862  H   ILE C   4      -2.892   3.937 -24.666  1.00  0.00           H  
ATOM   4863  HA  ILE C   4      -4.983   2.448 -25.997  1.00  0.00           H  
ATOM   4864  HB  ILE C   4      -5.071   5.111 -24.524  1.00  0.00           H  
ATOM   4865 1HG1 ILE C   4      -4.404   3.288 -23.086  1.00  0.00           H  
ATOM   4866 2HG1 ILE C   4      -6.043   3.791 -22.705  1.00  0.00           H  
ATOM   4867 1HG2 ILE C   4      -7.506   4.755 -24.454  1.00  0.00           H  
ATOM   4868 2HG2 ILE C   4      -6.929   4.906 -26.130  1.00  0.00           H  
ATOM   4869 3HG2 ILE C   4      -7.327   3.303 -25.468  1.00  0.00           H  
ATOM   4870 1HD1 ILE C   4      -5.837   1.369 -22.665  1.00  0.00           H  
ATOM   4871 2HD1 ILE C   4      -6.937   1.882 -23.968  1.00  0.00           H  
ATOM   4872 3HD1 ILE C   4      -5.276   1.371 -24.353  1.00  0.00           H  
ATOM   4873  N   GLU C   5      -3.904   5.286 -27.273  1.00  0.00           N  
ATOM   4874  CA  GLU C   5      -3.847   6.041 -28.518  1.00  0.00           C  
ATOM   4875  C   GLU C   5      -3.199   5.216 -29.617  1.00  0.00           C  
ATOM   4876  O   GLU C   5      -3.582   5.307 -30.789  1.00  0.00           O  
ATOM   4877  CB  GLU C   5      -3.073   7.346 -28.322  1.00  0.00           C  
ATOM   4878  CG  GLU C   5      -3.152   8.307 -29.500  1.00  0.00           C  
ATOM   4879  CD  GLU C   5      -2.614   9.673 -29.177  1.00  0.00           C  
ATOM   4880  OE1 GLU C   5      -1.490   9.761 -28.743  1.00  0.00           O  
ATOM   4881  OE2 GLU C   5      -3.327  10.630 -29.365  1.00  0.00           O  
ATOM   4882  H   GLU C   5      -3.311   5.562 -26.503  1.00  0.00           H  
ATOM   4883  HA  GLU C   5      -4.866   6.283 -28.823  1.00  0.00           H  
ATOM   4884 1HB  GLU C   5      -3.453   7.865 -27.441  1.00  0.00           H  
ATOM   4885 2HB  GLU C   5      -2.022   7.123 -28.142  1.00  0.00           H  
ATOM   4886 1HG  GLU C   5      -2.583   7.893 -30.332  1.00  0.00           H  
ATOM   4887 2HG  GLU C   5      -4.191   8.396 -29.814  1.00  0.00           H  
ATOM   4888  N   LEU C   6      -2.235   4.373 -29.256  1.00  0.00           N  
ATOM   4889  CA  LEU C   6      -1.728   3.390 -30.199  1.00  0.00           C  
ATOM   4890  C   LEU C   6      -2.826   2.433 -30.628  1.00  0.00           C  
ATOM   4891  O   LEU C   6      -2.899   2.026 -31.794  1.00  0.00           O  
ATOM   4892  CB  LEU C   6      -0.568   2.603 -29.575  1.00  0.00           C  
ATOM   4893  CG  LEU C   6       0.062   1.527 -30.468  1.00  0.00           C  
ATOM   4894  CD1 LEU C   6       0.563   2.165 -31.757  1.00  0.00           C  
ATOM   4895  CD2 LEU C   6       1.197   0.845 -29.718  1.00  0.00           C  
ATOM   4896  H   LEU C   6      -1.847   4.407 -28.324  1.00  0.00           H  
ATOM   4897  HA  LEU C   6      -1.360   3.915 -31.080  1.00  0.00           H  
ATOM   4898 1HB  LEU C   6       0.217   3.304 -29.297  1.00  0.00           H  
ATOM   4899 2HB  LEU C   6      -0.927   2.114 -28.670  1.00  0.00           H  
ATOM   4900  HG  LEU C   6      -0.693   0.787 -30.734  1.00  0.00           H  
ATOM   4901 1HD1 LEU C   6       1.011   1.400 -32.391  1.00  0.00           H  
ATOM   4902 2HD1 LEU C   6      -0.272   2.628 -32.282  1.00  0.00           H  
ATOM   4903 3HD1 LEU C   6       1.309   2.923 -31.521  1.00  0.00           H  
ATOM   4904 1HD2 LEU C   6       1.644   0.080 -30.353  1.00  0.00           H  
ATOM   4905 2HD2 LEU C   6       1.953   1.584 -29.453  1.00  0.00           H  
ATOM   4906 3HD2 LEU C   6       0.807   0.383 -28.811  1.00  0.00           H  
ATOM   4907  N   MET C   7      -3.692   2.065 -29.689  1.00  0.00           N  
ATOM   4908  CA  MET C   7      -4.798   1.187 -30.031  1.00  0.00           C  
ATOM   4909  C   MET C   7      -5.719   1.846 -31.042  1.00  0.00           C  
ATOM   4910  O   MET C   7      -6.318   1.157 -31.865  1.00  0.00           O  
ATOM   4911  CB  MET C   7      -5.574   0.797 -28.774  1.00  0.00           C  
ATOM   4912  CG  MET C   7      -6.609  -0.299 -28.987  1.00  0.00           C  
ATOM   4913  SD  MET C   7      -5.875  -1.848 -29.551  1.00  0.00           S  
ATOM   4914  CE  MET C   7      -5.105  -2.426 -28.042  1.00  0.00           C  
ATOM   4915  H   MET C   7      -3.595   2.386 -28.736  1.00  0.00           H  
ATOM   4916  HA  MET C   7      -4.394   0.283 -30.487  1.00  0.00           H  
ATOM   4917 1HB  MET C   7      -4.878   0.455 -28.009  1.00  0.00           H  
ATOM   4918 2HB  MET C   7      -6.091   1.672 -28.379  1.00  0.00           H  
ATOM   4919 1HG  MET C   7      -7.137  -0.487 -28.053  1.00  0.00           H  
ATOM   4920 2HG  MET C   7      -7.336   0.027 -29.730  1.00  0.00           H  
ATOM   4921 1HE  MET C   7      -4.608  -3.379 -28.229  1.00  0.00           H  
ATOM   4922 2HE  MET C   7      -4.371  -1.693 -27.703  1.00  0.00           H  
ATOM   4923 3HE  MET C   7      -5.866  -2.559 -27.272  1.00  0.00           H  
ATOM   4924  N   ILE C   8      -5.816   3.180 -31.014  1.00  0.00           N  
ATOM   4925  CA  ILE C   8      -6.522   3.893 -32.076  1.00  0.00           C  
ATOM   4926  C   ILE C   8      -5.864   3.608 -33.415  1.00  0.00           C  
ATOM   4927  O   ILE C   8      -6.531   3.340 -34.415  1.00  0.00           O  
ATOM   4928  CB  ILE C   8      -6.539   5.411 -31.818  1.00  0.00           C  
ATOM   4929  CG1 ILE C   8      -7.375   5.732 -30.577  1.00  0.00           C  
ATOM   4930  CG2 ILE C   8      -7.078   6.151 -33.033  1.00  0.00           C  
ATOM   4931  CD1 ILE C   8      -7.231   7.158 -30.096  1.00  0.00           C  
ATOM   4932  H   ILE C   8      -5.402   3.707 -30.259  1.00  0.00           H  
ATOM   4933  HA  ILE C   8      -7.553   3.541 -32.103  1.00  0.00           H  
ATOM   4934  HB  ILE C   8      -5.526   5.756 -31.614  1.00  0.00           H  
ATOM   4935 1HG1 ILE C   8      -8.428   5.548 -30.789  1.00  0.00           H  
ATOM   4936 2HG1 ILE C   8      -7.086   5.068 -29.762  1.00  0.00           H  
ATOM   4937 1HG2 ILE C   8      -7.084   7.222 -32.833  1.00  0.00           H  
ATOM   4938 2HG2 ILE C   8      -6.444   5.946 -33.895  1.00  0.00           H  
ATOM   4939 3HG2 ILE C   8      -8.094   5.815 -33.242  1.00  0.00           H
[truncated: 3,679,634 more chars]
