# Supplementary material for: Predicting and Interpreting the Structure of Type IV Pilus of Electricigens by Molecular Dynamics Simulations
Source: Molecules. 2017 Aug 12;22(8):1342. doi: 10.3390/molecules22081342 (PMC6152092; doi:10.3390/molecules22081342)
Supplement: Supplementary file 1 [file molecules-22-01342-s001.zip › Neisseria meningitidis 4 (NM4).pdb]

ATOM      1  N   PHE     1      80.248  75.761  85.936  0.00  0.00           N  
ATOM      2  CA  PHE     1      81.613  76.226  85.762  0.00  0.00           C  
ATOM      3  C   PHE     1      81.785  77.536  84.902  0.00  0.00           C  
ATOM      4  O   PHE     1      82.791  78.209  85.157  0.00  0.00           O  
ATOM      5  CB  PHE     1      82.566  75.139  85.244  0.00  0.00           C  
ATOM      6  CG  PHE     1      83.575  74.538  86.262  0.00  0.00           C  
ATOM      7  CD1 PHE     1      84.677  73.808  85.760  0.00  0.00           C  
ATOM      8  CD2 PHE     1      83.366  74.651  87.654  0.00  0.00           C  
ATOM      9  CE1 PHE     1      85.628  73.281  86.636  0.00  0.00           C  
ATOM     10  CE2 PHE     1      84.342  74.099  88.568  0.00  0.00           C  
ATOM     11  CZ  PHE     1      85.351  73.303  88.048  0.00  0.00           C  
ATOM     12  N   THR     2      80.988  77.830  83.860  0.00  0.00           N  
ATOM     13  CA  THR     2      81.335  78.980  83.045  0.00  0.00           C  
ATOM     14  C   THR     2      81.644  80.299  83.661  0.00  0.00           C  
ATOM     15  O   THR     2      82.373  81.082  83.044  0.00  0.00           O  
ATOM     16  CB  THR     2      80.472  79.162  81.775  0.00  0.00           C  
ATOM     17  CG2 THR     2      79.665  77.975  81.240  0.00  0.00           C  
ATOM     18  OG1 THR     2      79.439  80.120  81.868  0.00  0.00           O  
ATOM     19  N   LEU     3      81.253  80.503  84.951  0.00  0.00           N  
ATOM     20  CA  LEU     3      81.551  81.628  85.846  0.00  0.00           C  
ATOM     21  C   LEU     3      83.036  81.927  86.094  0.00  0.00           C  
ATOM     22  O   LEU     3      83.439  83.004  86.543  0.00  0.00           O  
ATOM     23  CB  LEU     3      80.797  81.449  87.209  0.00  0.00           C  
ATOM     24  CG  LEU     3      79.286  81.598  87.088  0.00  0.00           C  
ATOM     25  CD1 LEU     3      78.683  81.334  88.449  0.00  0.00           C  
ATOM     26  CD2 LEU     3      78.878  82.976  86.680  0.00  0.00           C  
ATOM     27  N   ILE     4      83.837  80.793  85.924  0.00  0.00           N  
ATOM     28  CA  ILE     4      85.283  81.003  86.144  0.00  0.00           C  
ATOM     29  C   ILE     4      85.864  82.137  85.248  0.00  0.00           C  
ATOM     30  O   ILE     4      86.774  82.848  85.700  0.00  0.00           O  
ATOM     31  CB  ILE     4      85.887  79.599  86.035  0.00  0.00           C  
ATOM     32  CG1 ILE     4      85.437  78.664  87.202  0.00  0.00           C  
ATOM     33  CG2 ILE     4      87.430  79.651  85.785  0.00  0.00           C  
ATOM     34  CD1 ILE     4      85.691  77.217  87.027  0.00  0.00           C  
ATOM     35  N   GLU     5      85.439  82.272  83.996  0.00  0.00           N  
ATOM     36  CA  GLU     5      85.932  83.317  83.122  0.00  0.00           C  
ATOM     37  C   GLU     5      85.663  84.712  83.704  0.00  0.00           C  
ATOM     38  O   GLU     5      86.496  85.590  83.757  0.00  0.00           O  
ATOM     39  CB  GLU     5      85.207  83.258  81.693  0.00  0.00           C  
ATOM     40  CG  GLU     5      85.747  84.405  80.805  0.00  0.00           C  
ATOM     41  CD  GLU     5      85.187  84.409  79.383  0.00  0.00           C  
ATOM     42  OE1 GLU     5      84.754  83.365  78.846  0.00  0.00           O  
ATOM     43  OE2 GLU     5      85.173  85.466  78.725  0.00  0.00           O1-
ATOM     44  N   LEU     6      84.482  84.904  84.353  0.00  0.00           N  
ATOM     45  CA  LEU     6      84.132  86.164  85.075  0.00  0.00           C  
ATOM     46  C   LEU     6      84.917  86.374  86.405  0.00  0.00           C  
ATOM     47  O   LEU     6      85.331  87.538  86.616  0.00  0.00           O  
ATOM     48  CB  LEU     6      82.635  86.239  85.255  0.00  0.00           C  
ATOM     49  CG  LEU     6      81.848  86.265  83.889  0.00  0.00           C  
ATOM     50  CD1 LEU     6      80.383  86.004  84.192  0.00  0.00           C  
ATOM     51  CD2 LEU     6      82.127  87.403  82.836  0.00  0.00           C  
ATOM     52  N   MET     7      85.183  85.341  87.160  0.00  0.00           N  
ATOM     53  CA  MET     7      86.051  85.372  88.312  0.00  0.00           C  
ATOM     54  C   MET     7      87.444  85.704  87.871  0.00  0.00           C  
ATOM     55  O   MET     7      88.078  86.529  88.518  0.00  0.00           O  
ATOM     56  CB  MET     7      85.966  83.989  88.962  0.00  0.00           C  
ATOM     57  CG  MET     7      84.768  83.909  89.833  0.00  0.00           C  
ATOM     58  SD  MET     7      84.930  82.558  90.957  0.00  0.00           S  
ATOM     59  CE  MET     7      84.911  81.110  89.902  0.00  0.00           C  
ATOM     60  N   ILE     8      87.953  85.204  86.762  0.00  0.00           N  
ATOM     61  CA  ILE     8      89.129  85.574  86.097  0.00  0.00           C  
ATOM     62  C   ILE     8      89.230  87.020  85.765  0.00  0.00           C  
ATOM     63  O   ILE     8      90.181  87.632  86.063  0.00  0.00           O  
ATOM     64  CB  ILE     8      89.452  84.592  85.045  0.00  0.00           C  
ATOM     65  CG1 ILE     8      89.984  83.282  85.685  0.00  0.00           C  
ATOM     66  CG2 ILE     8      90.477  85.153  83.954  0.00  0.00           C  
ATOM     67  CD1 ILE     8      90.063  82.073  84.670  0.00  0.00           C  
ATOM     68  N   VAL     9      88.182  87.547  85.111  0.00  0.00           N  
ATOM     69  CA  VAL     9      88.030  89.043  84.792  0.00  0.00           C  
ATOM     70  C   VAL     9      88.105  89.907  85.998  0.00  0.00           C  
ATOM     71  O   VAL     9      88.725  90.971  85.956  0.00  0.00           O  
ATOM     72  CB  VAL     9      86.742  89.242  83.948  0.00  0.00           C  
ATOM     73  CG1 VAL     9      86.394  90.733  83.617  0.00  0.00           C  
ATOM     74  CG2 VAL     9      86.672  88.518  82.615  0.00  0.00           C  
ATOM     75  N   ILE    10      87.591  89.536  87.187  0.00  0.00           N  
ATOM     76  CA  ILE    10      87.659  90.430  88.357  0.00  0.00           C  
ATOM     77  C   ILE    10      89.037  90.210  88.996  0.00  0.00           C  
ATOM     78  O   ILE    10      89.627  91.137  89.476  0.00  0.00           O  
ATOM     79  CB  ILE    10      86.362  90.298  89.271  0.00  0.00           C  
ATOM     80  CG1 ILE    10      86.248  88.978  89.944  0.00  0.00           C  
ATOM     81  CG2 ILE    10      85.185  90.621  88.434  0.00  0.00           C  
ATOM     82  CD1 ILE    10      85.199  88.781  91.064  0.00  0.00           C  
ATOM     83  N   ALA    11      89.612  89.016  88.941  0.00  0.00           N  
ATOM     84  CA  ALA    11      90.935  88.797  89.391  0.00  0.00           C  
ATOM     85  C   ALA    11      91.994  89.599  88.581  0.00  0.00           C  
ATOM     86  O   ALA    11      93.009  90.082  89.100  0.00  0.00           O  
ATOM     87  CB  ALA    11      91.241  87.321  89.571  0.00  0.00           C  
ATOM     88  N   ILE    12      91.738  89.896  87.319  0.00  0.00           N  
ATOM     89  CA  ILE    12      92.431  90.727  86.375  0.00  0.00           C  
ATOM     90  C   ILE    12      92.231  92.291  86.727  0.00  0.00           C  
ATOM     91  O   ILE    12      93.237  92.985  86.803  0.00  0.00           O  
ATOM     92  CB  ILE    12      92.088  90.273  84.905  0.00  0.00           C  
ATOM     93  CG1 ILE    12      92.755  88.935  84.592  0.00  0.00           C  
ATOM     94  CG2 ILE    12      92.490  91.394  83.945  0.00  0.00           C  
ATOM     95  CD1 ILE    12      92.321  88.401  83.217  0.00  0.00           C  
ATOM     96  N   VAL    13      91.030  92.729  87.085  0.00  0.00           N  
ATOM     97  CA  VAL    13      90.905  94.119  87.513  0.00  0.00           C  
ATOM     98  C   VAL    13      91.481  94.331  88.905  0.00  0.00           C  
ATOM     99  O   VAL    13      92.086  95.335  89.224  0.00  0.00           O  
ATOM    100  CB  VAL    13      89.528  94.708  87.249  0.00  0.00           C  
ATOM    101  CG1 VAL    13      89.647  96.207  87.142  0.00  0.00           C  
ATOM    102  CG2 VAL    13      88.687  94.349  86.049  0.00  0.00           C  
ATOM    103  N   GLY    14      91.438  93.263  89.799  0.00  0.00           N  
ATOM    104  CA  GLY    14      92.244  93.011  91.014  0.00  0.00           C  
ATOM    105  C   GLY    14      93.802  93.126  90.826  0.00  0.00           C  
ATOM    106  O   GLY    14      94.485  93.535  91.808  0.00  0.00           O  
ATOM    107  N   ILE    15      94.361  92.966  89.627  0.00  0.00           N  
ATOM    108  CA  ILE    15      95.736  93.426  89.372  0.00  0.00           C  
ATOM    109  C   ILE    15      95.767  94.873  88.705  0.00  0.00           C  
ATOM    110  O   ILE    15      96.190  95.813  89.351  0.00  0.00           O  
ATOM    111  CB  ILE    15      96.679  92.492  88.616  0.00  0.00           C  
ATOM    112  CG1 ILE    15      96.114  92.048  87.226  0.00  0.00           C  
ATOM    113  CG2 ILE    15      96.858  91.240  89.498  0.00  0.00           C  
ATOM    114  CD1 ILE    15      96.883  91.159  86.328  0.00  0.00           C  
ATOM    115  N   LEU    16      95.023  95.090  87.609  0.00  0.00           N  
ATOM    116  CA  LEU    16      95.229  96.237  86.701  0.00  0.00           C  
ATOM    117  C   LEU    16      94.840  97.605  87.307  0.00  0.00           C  
ATOM    118  O   LEU    16      95.220  98.592  86.707  0.00  0.00           O  
ATOM    119  CB  LEU    16      94.383  96.008  85.413  0.00  0.00           C  
ATOM    120  CG  LEU    16      94.713  94.912  84.365  0.00  0.00           C  
ATOM    121  CD1 LEU    16      93.675  94.682  83.230  0.00  0.00           C  
ATOM    122  CD2 LEU    16      96.087  95.061  83.747  0.00  0.00           C  
ATOM    123  N   ALA    17      94.163  97.600  88.471  0.00  0.00           N  
ATOM    124  CA  ALA    17      93.681  98.855  89.089  0.00  0.00           C  
ATOM    125  C   ALA    17      94.751  99.597  89.846  0.00  0.00           C  
ATOM    126  O   ALA    17      94.625 100.784  90.069  0.00  0.00           O  
ATOM    127  CB  ALA    17      92.430  98.652  89.892  0.00  0.00           C  
ATOM    128  N   ALA    18      95.877  99.012  90.266  0.00  0.00           N  
ATOM    129  CA  ALA    18      96.922  99.669  91.058  0.00  0.00           C  
ATOM    130  C   ALA    18      98.263  98.925  91.117  0.00  0.00           C  
ATOM    131  O   ALA    18      98.257  97.795  90.698  0.00  0.00           O  
ATOM    132  CB  ALA    18      96.372  99.692  92.461  0.00  0.00           C  
ATOM    133  N   VAL    19      99.378  99.521  91.665  0.00  0.00           N  
ATOM    134  CA  VAL    19     100.691  98.895  91.873  0.00  0.00           C  
ATOM    135  C   VAL    19     101.463  98.527  90.556  0.00  0.00           C  
ATOM    136  O   VAL    19     102.622  98.448  90.642  0.00  0.00           O  
ATOM    137  CB  VAL    19     100.636  97.896  93.069  0.00  0.00           C  
ATOM    138  CG1 VAL    19     102.072  97.565  93.482  0.00  0.00           C  
ATOM    139  CG2 VAL    19      99.660  98.260  94.191  0.00  0.00           C  
ATOM    140  N   ALA    20     100.931  98.708  89.400  0.00  0.00           N  
ATOM    141  CA  ALA    20     101.577  98.946  88.093  0.00  0.00           C  
ATOM    142  C   ALA    20     102.003 100.464  87.982  0.00  0.00           C  
ATOM    143  O   ALA    20     101.320 101.253  87.406  0.00  0.00           O  
ATOM    144  CB  ALA    20     100.638  98.513  86.998  0.00  0.00           C  
ATOM    145  N   LEU    21     102.999 100.706  88.800  0.00  0.00           N  
ATOM    146  CA  LEU    21     103.524 102.043  88.997  0.00  0.00           C  
ATOM    147  C   LEU    21     105.001 101.992  88.565  0.00  0.00           C  
ATOM    148  O   LEU    21     105.867 101.921  89.489  0.00  0.00           O  
ATOM    149  CB  LEU    21     103.460 102.519  90.451  0.00  0.00           C  
ATOM    150  CG  LEU    21     102.022 102.648  90.958  0.00  0.00           C  
ATOM    151  CD1 LEU    21     101.991 102.643  92.503  0.00  0.00           C  
ATOM    152  CD2 LEU    21     101.297 103.889  90.431  0.00  0.00           C  
ATOM    153  N   PRO    22     105.403 101.834  87.284  0.00  0.00           N  
ATOM    154  CA  PRO    22     106.781 101.748  86.809  0.00  0.00           C  
ATOM    155  C   PRO    22     107.629 102.941  87.184  0.00  0.00           C  
ATOM    156  O   PRO    22     107.521 103.958  86.467  0.00  0.00           O  
ATOM    157  CB  PRO    22     106.700 101.538  85.271  0.00  0.00           C  
ATOM    158  CG  PRO    22     105.329 102.049  84.919  0.00  0.00           C  
ATOM    159  CD  PRO    22     104.489 101.719  86.137  0.00  0.00           C  
ATOM    160  N   ALA    23     108.598 102.779  88.061  0.00  0.00           N  
ATOM    161  CA  ALA    23     109.725 103.735  88.366  0.00  0.00           C  
ATOM    162  C   ALA    23     109.333 105.173  88.576  0.00  0.00           C  
ATOM    163  O   ALA    23     110.180 106.077  88.503  0.00  0.00           O  
ATOM    164  CB  ALA    23     110.781 103.579  87.236  0.00  0.00           C  
ATOM    165  N   TYR    24     108.060 105.461  88.749  0.00  0.00           N  
ATOM    166  CA  TYR    24     107.563 106.846  88.716  0.00  0.00           C  
ATOM    167  C   TYR    24     108.217 107.878  89.760  0.00  0.00           C  
ATOM    168  O   TYR    24     108.596 108.973  89.368  0.00  0.00           O  
ATOM    169  CB  TYR    24     106.011 106.979  88.767  0.00  0.00           C  
ATOM    170  CG  TYR    24     105.421 106.643  87.399  0.00  0.00           C  
ATOM    171  CD1 TYR    24     105.631 107.460  86.290  0.00  0.00           C  
ATOM    172  CD2 TYR    24     104.541 105.548  87.337  0.00  0.00           C  
ATOM    173  CE1 TYR    24     105.022 107.186  85.036  0.00  0.00           C  
ATOM    174  CE2 TYR    24     103.815 105.341  86.113  0.00  0.00           C  
ATOM    175  CZ  TYR    24     104.119 106.110  84.939  0.00  0.00           C  
ATOM    176  OH  TYR    24     103.417 106.032  83.771  0.00  0.00           O  
ATOM    177  N   GLN    25     108.599 107.363  90.914  0.00  0.00           N  
ATOM    178  CA  GLN    25     109.250 108.155  91.913  0.00  0.00           C  
ATOM    179  C   GLN    25     110.761 108.399  91.652  0.00  0.00           C  
ATOM    180  O   GLN    25     111.372 109.348  92.176  0.00  0.00           O  
ATOM    181  CB  GLN    25     109.068 107.509  93.282  0.00  0.00           C  
ATOM    182  CG  GLN    25     109.432 108.361  94.475  0.00  0.00           C  
ATOM    183  CD  GLN    25     109.227 107.769  95.852  0.00  0.00           C  
ATOM    184  NE2 GLN    25     108.887 108.609  96.804  0.00  0.00           N  
ATOM    185  OE1 GLN    25     109.450 106.596  96.165  0.00  0.00           O  
ATOM    186  N   ASP    26     111.342 107.521  90.787  0.00  0.00           N  
ATOM    187  CA  ASP    26     112.671 107.818  90.185  0.00  0.00           C  
ATOM    188  C   ASP    26     112.575 109.020  89.288  0.00  0.00           C  
ATOM    189  O   ASP    26     113.343 109.978  89.400  0.00  0.00           O  
ATOM    190  CB  ASP    26     113.263 106.654  89.393  0.00  0.00           C  
ATOM    191  CG  ASP    26     113.380 105.299  90.079  0.00  0.00           C  
ATOM    192  OD1 ASP    26     112.722 105.010  91.036  0.00  0.00           O  
ATOM    193  OD2 ASP    26     114.266 104.531  89.631  0.00  0.00           O1-
ATOM    194  N   TYR    27     111.620 109.042  88.398  0.00  0.00           N  
ATOM    195  CA  TYR    27     111.329 110.165  87.554  0.00  0.00           C  
ATOM    196  C   TYR    27     111.052 111.429  88.211  0.00  0.00           C  
ATOM    197  O   TYR    27     111.553 112.497  87.788  0.00  0.00           O  
ATOM    198  CB  TYR    27     110.418 109.800  86.323  0.00  0.00           C  
ATOM    199  CG  TYR    27     110.992 108.744  85.330  0.00  0.00           C  
ATOM    200  CD1 TYR    27     110.708 107.428  85.612  0.00  0.00           C  
ATOM    201  CD2 TYR    27     111.938 109.139  84.398  0.00  0.00           C  
ATOM    202  CE1 TYR    27     111.370 106.409  84.867  0.00  0.00           C  
ATOM    203  CE2 TYR    27     112.578 108.104  83.626  0.00  0.00           C  
ATOM    204  CZ  TYR    27     112.293 106.746  83.849  0.00  0.00           C  
ATOM    205  OH  TYR    27     112.834 105.806  83.116  0.00  0.00           O  
ATOM    206  N   THR    28     110.269 111.415  89.304  0.00  0.00           N  
ATOM    207  CA  THR    28     110.158 112.574  90.119  0.00  0.00           C  
ATOM    208  C   THR    28     111.436 113.116  90.664  0.00  0.00           C  
ATOM    209  O   THR    28     111.692 114.269  90.542  0.00  0.00           O  
ATOM    210  CB  THR    28     109.197 112.347  91.277  0.00  0.00           C  
ATOM    211  CG2 THR    28     108.675 113.679  91.864  0.00  0.00           C  
ATOM    212  OG1 THR    28     108.052 111.590  90.920  0.00  0.00           O  
ATOM    213  N   ALA    29     112.260 112.257  91.193  0.00  0.00           N  
ATOM    214  CA  ALA    29     113.523 112.642  91.825  0.00  0.00           C  
ATOM    215  C   ALA    29     114.448 113.350  90.870  0.00  0.00           C  
ATOM    216  O   ALA    29     114.854 114.495  91.164  0.00  0.00           O  
ATOM    217  CB  ALA    29     114.159 111.418  92.453  0.00  0.00           C  
ATOM    218  N   ARG    30     114.679 112.722  89.713  0.00  0.00           N  
ATOM    219  CA  ARG    30     115.419 113.294  88.493  0.00  0.00           C  
ATOM    220  C   ARG    30     115.018 114.743  88.222  0.00  0.00           C  
ATOM    221  O   ARG    30     115.719 115.710  88.324  0.00  0.00           O  
ATOM    222  CB  ARG    30     115.126 112.311  87.354  0.00  0.00           C  
ATOM    223  CG  ARG    30     115.928 111.044  87.530  0.00  0.00           C  
ATOM    224  CD  ARG    30     115.373 109.783  86.724  0.00  0.00           C  
ATOM    225  NE  ARG    30     116.368 109.369  85.720  0.00  0.00           N  
ATOM    226  CZ  ARG    30     116.438 109.703  84.438  0.00  0.00           C  
ATOM    227  NH1 ARG    30     115.681 110.644  83.908  0.00  0.00           N1+
ATOM    228  NH2 ARG    30     117.348 109.152  83.712  0.00  0.00           N  
ATOM    229  N   ALA    31     113.687 114.846  88.136  0.00  0.00           N  
ATOM    230  CA  ALA    31     112.987 116.161  87.999  0.00  0.00           C  
ATOM    231  C   ALA    31     113.245 117.161  89.156  0.00  0.00           C  
ATOM    232  O   ALA    31     113.909 118.153  88.971  0.00  0.00           O  
ATOM    233  CB  ALA    31     111.471 116.076  87.662  0.00  0.00           C  
ATOM    234  N   GLN    32     112.841 116.844  90.388  0.00  0.00           N  
ATOM    235  CA  GLN    32     112.969 117.693  91.616  0.00  0.00           C  
ATOM    236  C   GLN    32     114.443 118.124  91.854  0.00  0.00           C  
ATOM    237  O   GLN    32     114.716 119.286  92.056  0.00  0.00           O  
ATOM    238  CB  GLN    32     112.248 117.053  92.811  0.00  0.00           C  
ATOM    239  CG  GLN    32     110.746 117.048  92.762  0.00  0.00           C  
ATOM    240  CD  GLN    32     109.971 116.417  93.966  0.00  0.00           C  
ATOM    241  NE2 GLN    32     108.712 116.896  94.249  0.00  0.00           N  
ATOM    242  OE1 GLN    32     110.334 115.385  94.566  0.00  0.00           O  
ATOM    243  N   VAL    33     115.379 117.154  91.964  0.00  0.00           N  
ATOM    244  CA  VAL    33     116.821 117.423  92.126  0.00  0.00           C  
ATOM    245  C   VAL    33     117.431 118.307  90.913  0.00  0.00           C  
ATOM    246  O   VAL    33     118.124 119.271  91.178  0.00  0.00           O  
ATOM    247  CB  VAL    33     117.756 116.203  92.285  0.00  0.00           C  
ATOM    248  CG1 VAL    33     119.235 116.512  92.534  0.00  0.00           C  
ATOM    249  CG2 VAL    33     117.239 115.329  93.432  0.00  0.00           C  
ATOM    250  N   SER    34     117.098 117.983  89.616  0.00  0.00           N  
ATOM    251  CA  SER    34     117.598 118.843  88.492  0.00  0.00           C  
ATOM    252  C   SER    34     117.120 120.249  88.500  0.00  0.00           C  
ATOM    253  O   SER    34     117.856 121.207  88.268  0.00  0.00           O  
ATOM    254  CB  SER    34     117.440 118.061  87.082  0.00  0.00           C  
ATOM    255  OG  SER    34     116.104 117.731  86.727  0.00  0.00           O  
ATOM    256  N   GLU    35     115.895 120.533  88.864  0.00  0.00           N  
ATOM    257  CA  GLU    35     115.276 121.865  88.978  0.00  0.00           C  
ATOM    258  C   GLU    35     115.978 122.693  90.034  0.00  0.00           C  
ATOM    259  O   GLU    35     116.433 123.790  89.764  0.00  0.00           O  
ATOM    260  CB  GLU    35     113.741 121.786  89.117  0.00  0.00           C  
ATOM    261  CG  GLU    35     113.008 123.038  89.171  0.00  0.00           C  
ATOM    262  CD  GLU    35     111.586 122.896  88.622  0.00  0.00           C  
ATOM    263  OE1 GLU    35     111.093 123.789  87.945  0.00  0.00           O  
ATOM    264  OE2 GLU    35     110.802 122.027  89.104  0.00  0.00           O1-
ATOM    265  N   ALA    36     116.221 122.094  91.247  0.00  0.00           N  
ATOM    266  CA  ALA    36     117.013 122.631  92.330  0.00  0.00           C  
ATOM    267  C   ALA    36     118.437 122.979  92.007  0.00  0.00           C  
ATOM    268  O   ALA    36     118.874 124.138  92.307  0.00  0.00           O  
ATOM    269  CB  ALA    36     116.938 121.550  93.426  0.00  0.00           C  
ATOM    270  N   ILE    37     119.059 122.139  91.225  0.00  0.00           N  
ATOM    271  CA  ILE    37     120.384 122.363  90.683  0.00  0.00           C  
ATOM    272  C   ILE    37     120.387 123.612  89.704  0.00  0.00           C  
ATOM    273  O   ILE    37     121.223 124.445  89.762  0.00  0.00           O  
ATOM    274  CB  ILE    37     121.001 121.104  89.977  0.00  0.00           C  
ATOM    275  CG1 ILE    37     121.347 120.124  91.161  0.00  0.00           C  
ATOM    276  CG2 ILE    37     122.140 121.380  89.002  0.00  0.00           C  
ATOM    277  CD1 ILE    37     122.640 120.409  91.920  0.00  0.00           C  
ATOM    278  N   LEU    38     119.317 123.686  88.887  0.00  0.00           N  
ATOM    279  CA  LEU    38     119.057 124.720  87.927  0.00  0.00           C  
ATOM    280  C   LEU    38     118.980 126.080  88.651  0.00  0.00           C  
ATOM    281  O   LEU    38     119.610 127.032  88.208  0.00  0.00           O  
ATOM    282  CB  LEU    38     117.921 124.429  86.897  0.00  0.00           C  
ATOM    283  CG  LEU    38     118.343 123.450  85.822  0.00  0.00           C  
ATOM    284  CD1 LEU    38     117.117 122.971  85.089  0.00  0.00           C  
ATOM    285  CD2 LEU    38     119.280 124.067  84.734  0.00  0.00           C  
ATOM    286  N   LEU    39     118.315 126.136  89.755  0.00  0.00           N  
ATOM    287  CA  LEU    39     118.257 127.378  90.582  0.00  0.00           C  
ATOM    288  C   LEU    39     119.573 127.739  91.254  0.00  0.00           C  
ATOM    289  O   LEU    39     119.854 128.932  91.334  0.00  0.00           O  
ATOM    290  CB  LEU    39     117.145 127.181  91.589  0.00  0.00           C  
ATOM    291  CG  LEU    39     116.839 128.341  92.537  0.00  0.00           C  
ATOM    292  CD1 LEU    39     116.508 129.578  91.647  0.00  0.00           C  
ATOM    293  CD2 LEU    39     115.775 128.103  93.623  0.00  0.00           C  
ATOM    294  N   ALA    40     120.435 126.782  91.562  0.00  0.00           N  
ATOM    295  CA  ALA    40     121.823 126.976  92.074  0.00  0.00           C  
ATOM    296  C   ALA    40     122.814 127.462  90.924  0.00  0.00           C  
ATOM    297  O   ALA    40     123.775 128.138  91.332  0.00  0.00           O  
ATOM    298  CB  ALA    40     122.425 125.644  92.713  0.00  0.00           C  
ATOM    299  N   GLU    41     122.538 127.036  89.762  0.00  0.00           N  
ATOM    300  CA  GLU    41     123.334 127.510  88.601  0.00  0.00           C  
ATOM    301  C   GLU    41     123.487 129.028  88.416  0.00  0.00           C  
ATOM    302  O   GLU    41     124.521 129.517  87.927  0.00  0.00           O  
ATOM    303  CB  GLU    41     122.961 126.824  87.304  0.00  0.00           C  
ATOM    304  CG  GLU    41     123.193 125.338  87.173  0.00  0.00           C  
ATOM    305  CD  GLU    41     123.332 124.941  85.698  0.00  0.00           C  
ATOM    306  OE1 GLU    41     122.621 125.476  84.771  0.00  0.00           O  
ATOM    307  OE2 GLU    41     124.131 124.050  85.422  0.00  0.00           O1-
ATOM    308  N   GLY    42     122.537 129.807  88.917  0.00  0.00           N  
ATOM    309  CA  GLY    42     122.514 131.267  88.852  0.00  0.00           C  
ATOM    310  C   GLY    42     123.722 131.872  89.585  0.00  0.00           C  
ATOM    311  O   GLY    42     123.954 133.018  89.335  0.00  0.00           O  
ATOM    312  N   GLN    43     124.401 131.106  90.423  0.00  0.00           N  
ATOM    313  CA  GLN    43     125.614 131.586  91.077  0.00  0.00           C  
ATOM    314  C   GLN    43     126.886 131.442  90.130  0.00  0.00           C  
ATOM    315  O   GLN    43     127.853 132.189  90.338  0.00  0.00           O  
ATOM    316  CB  GLN    43     125.741 130.999  92.489  0.00  0.00           C  
ATOM    317  CG  GLN    43     124.897 131.740  93.544  0.00  0.00           C  
ATOM    318  CD  GLN    43     125.022 131.004  94.875  0.00  0.00           C  
ATOM    319  NE2 GLN    43     124.592 131.545  95.981  0.00  0.00           N  
ATOM    320  OE1 GLN    43     125.532 129.895  94.839  0.00  0.00           O  
ATOM    321  N   LYS    44     126.840 130.621  89.069  0.00  0.00           N  
ATOM    322  CA  LYS    44     127.997 130.300  88.169  0.00  0.00           C  
ATOM    323  C   LYS    44     128.637 131.503  87.471  0.00  0.00           C  
ATOM    324  O   LYS    44     129.891 131.555  87.481  0.00  0.00           O  
ATOM    325  CB  LYS    44     127.546 129.285  87.184  0.00  0.00           C  
ATOM    326  CG  LYS    44     127.181 127.946  87.731  0.00  0.00           C  
ATOM    327  CD  LYS    44     126.917 126.989  86.542  0.00  0.00           C  
ATOM    328  CE  LYS    44     126.953 125.488  87.032  0.00  0.00           C  
ATOM    329  NZ  LYS    44     126.719 124.512  85.927  0.00  0.00           N1+
ATOM    330  N   SER    45     127.842 132.430  86.974  0.00  0.00           N  
ATOM    331  CA  SER    45     128.249 133.639  86.263  0.00  0.00           C  
ATOM    332  C   SER    45     129.180 134.586  87.034  0.00  0.00           C  
ATOM    333  O   SER    45     130.297 134.876  86.421  0.00  0.00           O  
ATOM    334  CB  SER    45     126.940 134.374  85.763  0.00  0.00           C  
ATOM    335  OG  SER    45     126.130 133.526  84.880  0.00  0.00           O  
ATOM    336  N   ALA    46     128.785 134.970  88.286  0.00  0.00           N  
ATOM    337  CA  ALA    46     129.647 135.737  89.077  0.00  0.00           C  
ATOM    338  C   ALA    46     130.918 135.081  89.545  0.00  0.00           C  
ATOM    339  O   ALA    46     131.962 135.676  89.460  0.00  0.00           O  
ATOM    340  CB  ALA    46     128.823 136.266  90.325  0.00  0.00           C  
ATOM    341  N   VAL    47     130.875 133.783  89.913  0.00  0.00           N  
ATOM    342  CA  VAL    47     132.009 132.913  90.336  0.00  0.00           C  
ATOM    343  C   VAL    47     133.088 132.949  89.246  0.00  0.00           C  
ATOM    344  O   VAL    47     134.199 133.338  89.516  0.00  0.00           O  
ATOM    345  CB  VAL    47     131.614 131.522  90.710  0.00  0.00           C  
ATOM    346  CG1 VAL    47     132.839 130.559  90.933  0.00  0.00           C  
ATOM    347  CG2 VAL    47     130.918 131.614  92.122  0.00  0.00           C  
ATOM    348  N   THR    48     132.694 132.621  87.986  0.00  0.00           N  
ATOM    349  CA  THR    48     133.481 132.706  86.730  0.00  0.00           C  
ATOM    350  C   THR    48     134.116 134.152  86.428  0.00  0.00           C  
ATOM    351  O   THR    48     135.337 134.289  86.210  0.00  0.00           O  
ATOM    352  CB  THR    48     132.782 132.086  85.470  0.00  0.00           C  
ATOM    353  CG2 THR    48     133.855 131.699  84.440  0.00  0.00           C  
ATOM    354  OG1 THR    48     132.100 130.937  85.934  0.00  0.00           O  
ATOM    355  N   GLU    49     133.308 135.210  86.472  0.00  0.00           N  
ATOM    356  CA  GLU    49     133.599 136.639  86.224  0.00  0.00           C  
ATOM    357  C   GLU    49     134.672 137.232  87.180  0.00  0.00           C  
ATOM    358  O   GLU    49     135.477 138.015  86.717  0.00  0.00           O  
ATOM    359  CB  GLU    49     132.319 137.442  86.354  0.00  0.00           C  
ATOM    360  CG  GLU    49     132.580 138.980  86.374  0.00  0.00           C  
ATOM    361  CD  GLU    49     131.336 139.789  86.286  0.00  0.00           C  
ATOM    362  OE1 GLU    49     130.252 139.190  86.363  0.00  0.00           O  
ATOM    363  OE2 GLU    49     131.349 141.067  86.582  0.00  0.00           O1-
ATOM    364  N   TYR    50     134.721 136.737  88.369  0.00  0.00           N  
ATOM    365  CA  TYR    50     135.829 136.924  89.316  0.00  0.00           C  
ATOM    366  C   TYR    50     137.095 136.123  88.854  0.00  0.00           C  
ATOM    367  O   TYR    50     138.077 136.764  88.510  0.00  0.00           O  
ATOM    368  CB  TYR    50     135.281 136.684  90.743  0.00  0.00           C  
ATOM    369  CG  TYR    50     136.189 136.892  91.931  0.00  0.00           C  
ATOM    370  CD1 TYR    50     135.956 138.077  92.694  0.00  0.00           C  
ATOM    371  CD2 TYR    50     137.302 136.101  92.216  0.00  0.00           C  
ATOM    372  CE1 TYR    50     136.846 138.365  93.743  0.00  0.00           C  
ATOM    373  CE2 TYR    50     138.175 136.423  93.244  0.00  0.00           C  
ATOM    374  CZ  TYR    50     137.897 137.544  94.095  0.00  0.00           C  
ATOM    375  OH  TYR    50     138.670 137.808  95.207  0.00  0.00           O  
ATOM    376  N   TYR    51     136.950 134.749  88.872  0.00  0.00           N  
ATOM    377  CA  TYR    51     138.062 133.807  88.697  0.00  0.00           C  
ATOM    378  C   TYR    51     138.964 134.123  87.507  0.00  0.00           C  
ATOM    379  O   TYR    51     140.190 134.296  87.679  0.00  0.00           O  
ATOM    380  CB  TYR    51     137.543 132.317  88.654  0.00  0.00           C  
ATOM    381  CG  TYR    51     138.508 131.331  88.195  0.00  0.00           C  
ATOM    382  CD1 TYR    51     139.710 131.113  88.910  0.00  0.00           C  
ATOM    383  CD2 TYR    51     138.291 130.651  86.993  0.00  0.00           C  
ATOM    384  CE1 TYR    51     140.607 130.134  88.437  0.00  0.00           C  
ATOM    385  CE2 TYR    51     139.268 129.733  86.515  0.00  0.00           C  
ATOM    386  CZ  TYR    51     140.369 129.394  87.277  0.00  0.00           C  
ATOM    387  OH  TYR    51     141.236 128.534  86.818  0.00  0.00           O  
ATOM    388  N   LEU    52     138.461 134.098  86.294  0.00  0.00           N  
ATOM    389  CA  LEU    52     139.297 134.323  85.113  0.00  0.00           C  
ATOM    390  C   LEU    52     139.959 135.694  85.031  0.00  0.00           C  
ATOM    391  O   LEU    52     140.998 135.835  84.429  0.00  0.00           O  
ATOM    392  CB  LEU    52     138.399 134.153  83.824  0.00  0.00           C  
ATOM    393  CG  LEU    52     137.675 132.858  83.582  0.00  0.00           C  
ATOM    394  CD1 LEU    52     136.717 132.862  82.432  0.00  0.00           C  
ATOM    395  CD2 LEU    52     138.710 131.752  83.375  0.00  0.00           C  
ATOM    396  N   ASN    53     139.311 136.749  85.625  0.00  0.00           N  
ATOM    397  CA  ASN    53     139.867 138.133  85.636  0.00  0.00           C  
ATOM    398  C   ASN    53     140.816 138.517  86.813  0.00  0.00           C  
ATOM    399  O   ASN    53     141.683 139.307  86.626  0.00  0.00           O  
ATOM    400  CB  ASN    53     138.674 139.047  85.565  0.00  0.00           C  
ATOM    401  CG  ASN    53     138.002 138.943  84.281  0.00  0.00           C  
ATOM    402  ND2 ASN    53     136.856 138.336  84.222  0.00  0.00           N  
ATOM    403  OD1 ASN    53     138.471 139.404  83.221  0.00  0.00           O  
ATOM    404  N   HIE    54     140.643 137.953  88.017  0.00  0.00           N  
ATOM    405  CA  HIE    54     141.501 138.249  89.161  0.00  0.00           C  
ATOM    406  C   HIE    54     142.585 137.122  89.335  0.00  0.00           C  
ATOM    407  O   HIE    54     143.578 137.317  90.059  0.00  0.00           O  
ATOM    408  CB  HIE    54     140.631 138.567  90.374  0.00  0.00           C  
ATOM    409  CG  HIE    54     139.900 139.831  90.153  0.00  0.00           C  
ATOM    410  CD2 HIE    54     138.534 140.049  90.103  0.00  0.00           C  
ATOM    411  ND1 HIE    54     140.438 141.130  90.090  0.00  0.00           N  
ATOM    412  CE1 HIE    54     139.438 142.021  89.990  0.00  0.00           C  
ATOM    413  NE2 HIE    54     138.297 141.371  89.869  0.00  0.00           N  
ATOM    414  N   GLY    55     142.411 135.934  88.675  0.00  0.00           N  
ATOM    415  CA  GLY    55     143.407 134.812  88.703  0.00  0.00           C  
ATOM    416  C   GLY    55     143.476 133.912  89.940  0.00  0.00           C  
ATOM    417  O   GLY    55     144.368 133.060  90.021  0.00  0.00           O  
ATOM    418  N   GLU    56     142.501 134.046  90.884  0.00  0.00           N  
ATOM    419  CA  GLU    56     142.247 133.214  92.078  0.00  0.00           C  
ATOM    420  C   GLU    56     140.721 132.928  92.149  0.00  0.00           C  
ATOM    421  O   GLU    56     139.960 133.687  91.550  0.00  0.00           O  
ATOM    422  CB  GLU    56     142.770 133.922  93.360  0.00  0.00           C  
ATOM    423  CG  GLU    56     142.096 135.294  93.641  0.00  0.00           C  
ATOM    424  CD  GLU    56     142.046 135.673  95.070  0.00  0.00           C  
ATOM    425  OE1 GLU    56     142.819 135.088  95.937  0.00  0.00           O  
ATOM    426  OE2 GLU    56     141.251 136.639  95.348  0.00  0.00           O1-
ATOM    427  N   TRP    57     140.315 131.859  92.759  0.00  0.00           N  
ATOM    428  CA  TRP    57     138.859 131.610  93.097  0.00  0.00           C  
ATOM    429  C   TRP    57     138.318 132.573  94.129  0.00  0.00           C  
ATOM    430  O   TRP    57     138.971 132.925  95.085  0.00  0.00           O  
ATOM    431  CB  TRP    57     138.681 130.167  93.539  0.00  0.00           C  
ATOM    432  CG  TRP    57     139.156 129.139  92.480  0.00  0.00           C  
ATOM    433  CD1 TRP    57     140.298 128.445  92.504  0.00  0.00           C  
ATOM    434  CD2 TRP    57     138.479 128.802  91.215  0.00  0.00           C  
ATOM    435  CE2 TRP    57     139.240 127.760  90.565  0.00  0.00           C  
ATOM    436  CE3 TRP    57     137.277 129.069  90.592  0.00  0.00           C  
ATOM    437  NE1 TRP    57     140.415 127.654  91.382  0.00  0.00           N  
ATOM    438  CZ2 TRP    57     138.825 127.088  89.439  0.00  0.00           C  
ATOM    439  CZ3 TRP    57     136.963 128.570  89.342  0.00  0.00           C  
ATOM    440  CH2 TRP    57     137.734 127.561  88.709  0.00  0.00           C  
ATOM    441  N   PRO    58     137.014 132.966  93.926  0.00  0.00           N  
ATOM    442  CA  PRO    58     136.377 133.715  95.004  0.00  0.00           C  
ATOM    443  C   PRO    58     136.181 132.793  96.265  0.00  0.00           C  
ATOM    444  O   PRO    58     135.802 131.636  96.138  0.00  0.00           O  
ATOM    445  CB  PRO    58     135.003 134.117  94.527  0.00  0.00           C  
ATOM    446  CG  PRO    58     134.752 133.118  93.375  0.00  0.00           C  
ATOM    447  CD  PRO    58     136.161 132.680  92.857  0.00  0.00           C  
ATOM    448  N   GLY    59     136.667 133.215  97.483  0.00  0.00           N  
ATOM    449  CA  GLY    59     136.527 132.420  98.636  0.00  0.00           C  
ATOM    450  C   GLY    59     135.099 132.280  99.235  0.00  0.00           C  
ATOM    451  O   GLY    59     134.786 131.193  99.792  0.00  0.00           O  
ATOM    452  N   ASP    60     134.170 133.179  98.980  0.00  0.00           N  
ATOM    453  CA  ASP    60     132.765 133.158  99.572  0.00  0.00           C  
ATOM    454  C   ASP    60     131.764 133.848  98.676  0.00  0.00           C  
ATOM    455  O   ASP    60     132.169 134.310  97.595  0.00  0.00           O  
ATOM    456  CB  ASP    60     132.826 133.755 101.018  0.00  0.00           C  
ATOM    457  CG  ASP    60     133.202 135.274 101.109  0.00  0.00           C  
ATOM    458  OD1 ASP    60     133.644 135.895 100.119  0.00  0.00           O  
ATOM    459  OD2 ASP    60     133.047 135.806 102.208  0.00  0.00           O1-
ATOM    460  N   ASN    61     130.560 134.128  99.203  0.00  0.00           N  
ATOM    461  CA  ASN    61     129.591 134.843  98.454  0.00  0.00           C  
ATOM    462  C   ASN    61     129.842 136.314  98.422  0.00  0.00           C  
ATOM    463  O   ASN    61     129.439 137.015  97.444  0.00  0.00           O  
ATOM    464  CB  ASN    61     128.227 134.434  99.054  0.00  0.00           C  
ATOM    465  CG  ASN    61     127.867 135.185 100.337  0.00  0.00           C  
ATOM    466  ND2 ASN    61     127.050 136.192 100.249  0.00  0.00           N  
ATOM    467  OD1 ASN    61     128.143 134.728 101.451  0.00  0.00           O  
ATOM    468  N   SER    62     130.558 136.882  99.415  0.00  0.00           N  
ATOM    469  CA  SER    62     130.985 138.293  99.495  0.00  0.00           C  
ATOM    470  C   SER    62     132.018 138.673  98.434  0.00  0.00           C  
ATOM    471  O   SER    62     131.943 139.676  97.740  0.00  0.00           O  
ATOM    472  CB  SER    62     131.435 138.599 100.938  0.00  0.00           C  
ATOM    473  OG  SER    62     132.096 139.932 100.987  0.00  0.00           O  
ATOM    474  N   SER    63     133.050 137.912  98.349  0.00  0.00           N  
ATOM    475  CA  SER    63     134.082 137.979  97.330  0.00  0.00           C  
ATOM    476  C   SER    63     133.469 137.628  95.967  0.00  0.00           C  
ATOM    477  O   SER    63     133.761 138.470  95.077  0.00  0.00           O  
ATOM    478  CB  SER    63     135.296 137.137  97.681  0.00  0.00           C  
ATOM    479  OG  SER    63     135.003 135.744  97.832  0.00  0.00           O  
ATOM    480  N   ALA    64     132.628 136.683  95.789  0.00  0.00           N  
ATOM    481  CA  ALA    64     131.855 136.592  94.514  0.00  0.00           C  
ATOM    482  C   ALA    64     130.954 137.877  94.184  0.00  0.00           C  
ATOM    483  O   ALA    64     130.577 137.964  93.010  0.00  0.00           O  
ATOM    484  CB  ALA    64     131.137 135.279  94.612  0.00  0.00           C  
ATOM    485  N   GLY    65     130.676 138.690  95.192  0.00  0.00           N  
ATOM    486  CA  GLY    65     129.710 139.865  94.920  0.00  0.00           C  
ATOM    487  C   GLY    65     128.201 139.466  94.973  0.00  0.00           C  
ATOM    488  O   GLY    65     127.457 140.215  94.304  0.00  0.00           O  
ATOM    489  N   VAL    66     127.794 138.346  95.590  0.00  0.00           N  
ATOM    490  CA  VAL    66     126.345 137.858  95.458  0.00  0.00           C  
ATOM    491  C   VAL    66     125.789 137.470  96.743  0.00  0.00           C  
ATOM    492  O   VAL    66     126.487 137.419  97.705  0.00  0.00           O  
ATOM    493  CB  VAL    66     126.254 136.668  94.469  0.00  0.00           C  
ATOM    494  CG1 VAL    66     126.861 137.029  93.074  0.00  0.00           C  
ATOM    495  CG2 VAL    66     127.024 135.350  94.779  0.00  0.00           C  
ATOM    496  N   ALA    67     124.488 137.127  96.767  0.00  0.00           N  
ATOM    497  CA  ALA    67     123.699 136.747  97.944  0.00  0.00           C  
ATOM    498  C   ALA    67     124.149 135.423  98.660  0.00  0.00           C  
ATOM    499  O   ALA    67     124.693 134.514  98.076  0.00  0.00           O  
ATOM    500  CB  ALA    67     122.217 136.723  97.503  0.00  0.00           C  
ATOM    501  N   THR    68     123.821 135.377 100.004  0.00  0.00           N  
ATOM    502  CA  THR    68     124.326 134.310 100.877  0.00  0.00           C  
ATOM    503  C   THR    68     123.501 132.985 101.046  0.00  0.00           C  
ATOM    504  O   THR    68     122.466 132.937 100.365  0.00  0.00           O  
ATOM    505  CB  THR    68     124.704 134.980 102.279  0.00  0.00           C  
ATOM    506  CG2 THR    68     123.607 135.098 103.298  0.00  0.00           C  
ATOM    507  OG1 THR    68     125.690 134.192 102.844  0.00  0.00           O  
ATOM    508  N   SER    69     123.965 132.032 101.797  0.00  0.00           N  
ATOM    509  CA  SER    69     123.309 130.657 101.805  0.00  0.00           C  
ATOM    510  C   SER    69     121.811 130.650 102.258  0.00  0.00           C  
ATOM    511  O   SER    69     121.168 129.661 101.948  0.00  0.00           O  
ATOM    512  CB  SER    69     124.070 129.693 102.741  0.00  0.00           C  
ATOM    513  OG  SER    69     125.445 129.651 102.464  0.00  0.00           O  
ATOM    514  N   ALA    70     121.295 131.792 102.849  0.00  0.00           N  
ATOM    515  CA  ALA    70     119.938 131.894 103.241  0.00  0.00           C  
ATOM    516  C   ALA    70     119.000 132.465 102.224  0.00  0.00           C  
ATOM    517  O   ALA    70     117.785 132.280 102.309  0.00  0.00           O  
ATOM    518  CB  ALA    70     120.009 132.858 104.431  0.00  0.00           C  
ATOM    519  N   ASP    71     119.551 133.166 101.230  0.00  0.00           N  
ATOM    520  CA  ASP    71     118.921 133.738 100.044  0.00  0.00           C  
ATOM    521  C   ASP    71     118.627 132.742  98.953  0.00  0.00           C  
ATOM    522  O   ASP    71     118.735 131.523  99.106  0.00  0.00           O  
ATOM    523  CB  ASP    71     119.747 134.980  99.584  0.00  0.00           C  
ATOM    524  CG  ASP    71     119.953 135.977 100.740  0.00  0.00           C  
ATOM    525  OD1 ASP    71     118.930 136.257 101.481  0.00  0.00           O  
ATOM    526  OD2 ASP    71     121.112 136.468 100.914  0.00  0.00           O1-
ATOM    527  N   ILE    72     118.112 133.317  97.899  0.00  0.00           N  
ATOM    528  CA  ILE    72     117.675 132.749  96.559  0.00  0.00           C  
ATOM    529  C   ILE    72     116.548 131.679  96.630  0.00  0.00           C  
ATOM    530  O   ILE    72     115.937 131.264  95.657  0.00  0.00           O  
ATOM    531  CB  ILE    72     118.886 132.098  95.781  0.00  0.00           C  
ATOM    532  CG1 ILE    72     120.053 133.185  95.736  0.00  0.00           C  
ATOM    533  CG2 ILE    72     118.615 131.659  94.278  0.00  0.00           C  
ATOM    534  CD1 ILE    72     121.276 132.701  94.939  0.00  0.00           C  
ATOM    535  N   LYS    73     116.230 131.143  97.801  0.00  0.00           N  
ATOM    536  CA  LYS    73     115.196 130.016  98.120  0.00  0.00           C  
ATOM    537  C   LYS    73     113.911 130.111  97.183  0.00  0.00           C  
ATOM    538  O   LYS    73     113.192 131.101  97.372  0.00  0.00           O  
ATOM    539  CB  LYS    73     114.845 130.033  99.576  0.00  0.00           C  
ATOM    540  CG  LYS    73     116.044 129.933 100.562  0.00  0.00           C  
ATOM    541  CD  LYS    73     115.431 129.683 101.947  0.00  0.00           C  
ATOM    542  CE  LYS    73     116.555 129.313 102.852  0.00  0.00           C  
ATOM    543  NZ  LYS    73     116.035 128.854 104.184  0.00  0.00           N1+
ATOM    544  N   GLY    74     113.479 129.022  96.590  0.00  0.00           N  
ATOM    545  CA  GLY    74     112.325 129.026  95.674  0.00  0.00           C  
ATOM    546  C   GLY    74     112.033 127.624  95.293  0.00  0.00           C  
ATOM    547  O   GLY    74     111.898 126.810  96.246  0.00  0.00           O  
ATOM    548  N   LYS    75     112.119 127.333  93.994  0.00  0.00           N  
ATOM    549  CA  LYS    75     111.924 125.951  93.548  0.00  0.00           C  
ATOM    550  C   LYS    75     112.894 124.924  94.214  0.00  0.00           C  
ATOM    551  O   LYS    75     114.098 124.832  93.960  0.00  0.00           O  
ATOM    552  CB  LYS    75     112.097 125.860  91.997  0.00  0.00           C  
ATOM    553  CG  LYS    75     110.834 126.141  91.261  0.00  0.00           C  
ATOM    554  CD  LYS    75     109.878 124.962  91.238  0.00  0.00           C  
ATOM    555  CE  LYS    75     108.809 124.952  90.163  0.00  0.00           C  
ATOM    556  NZ  LYS    75     108.433 123.596  89.609  0.00  0.00           N1+
ATOM    557  N   TYR    76     112.318 124.160  95.152  0.00  0.00           N  
ATOM    558  CA  TYR    76     112.994 123.026  95.837  0.00  0.00           C  
ATOM    559  C   TYR    76     114.259 123.272  96.705  0.00  0.00           C  
ATOM    560  O   TYR    76     114.654 122.387  97.481  0.00  0.00           O  
ATOM    561  CB  TYR    76     113.192 121.838  94.860  0.00  0.00           C  
ATOM    562  CG  TYR    76     111.898 121.360  94.339  0.00  0.00           C  
ATOM    563  CD1 TYR    76     111.485 121.525  93.015  0.00  0.00           C  
ATOM    564  CD2 TYR    76     110.982 120.729  95.210  0.00  0.00           C  
ATOM    565  CE1 TYR    76     110.215 121.139  92.494  0.00  0.00           C  
ATOM    566  CE2 TYR    76     109.709 120.268  94.756  0.00  0.00           C  
ATOM    567  CZ  TYR    76     109.353 120.413  93.375  0.00  0.00           C  
ATOM    568  OH  TYR    76     108.160 119.898  92.941  0.00  0.00           O  
ATOM    569  N   VAL    77     114.936 124.407  96.623  0.00  0.00           N  
ATOM    570  CA  VAL    77     116.257 124.663  97.231  0.00  0.00           C  
ATOM    571  C   VAL    77     116.123 125.447  98.541  0.00  0.00           C  
ATOM    572  O   VAL    77     115.418 126.466  98.498  0.00  0.00           O  
ATOM    573  CB  VAL    77     117.191 125.552  96.354  0.00  0.00           C  
ATOM    574  CG1 VAL    77     118.528 125.929  96.922  0.00  0.00           C  
ATOM    575  CG2 VAL    77     117.518 124.828  95.003  0.00  0.00           C  
ATOM    576  N   GLN    78     116.819 125.087  99.652  0.00  0.00           N  
ATOM    577  CA  GLN    78     116.947 125.675 100.958  0.00  0.00           C  
ATOM    578  C   GLN    78     118.360 126.141 101.385  0.00  0.00           C  
ATOM    579  O   GLN    78     118.534 126.728 102.452  0.00  0.00           O  
ATOM    580  CB  GLN    78     116.283 124.777 102.052  0.00  0.00           C  
ATOM    581  CG  GLN    78     114.759 124.875 102.116  0.00  0.00           C  
ATOM    582  CD  GLN    78     114.168 126.179 102.388  0.00  0.00           C  
ATOM    583  NE2 GLN    78     113.360 126.627 101.467  0.00  0.00           N  
ATOM    584  OE1 GLN    78     114.313 126.807 103.435  0.00  0.00           O  
ATOM    585  N   SER    79     119.421 125.771 100.602  0.00  0.00           N  
ATOM    586  CA  SER    79     120.765 126.399 100.788  0.00  0.00           C  
ATOM    587  C   SER    79     121.639 126.593  99.493  0.00  0.00           C  
ATOM    588  O   SER    79     121.516 125.827  98.604  0.00  0.00           O  
ATOM    589  CB  SER    79     121.536 125.659 101.862  0.00  0.00           C  
ATOM    590  OG  SER    79     122.759 126.268 102.129  0.00  0.00           O  
ATOM    591  N   VAL    80     122.353 127.708  99.463  0.00  0.00           N  
ATOM    592  CA  VAL    80     123.040 128.211  98.233  0.00  0.00           C  
ATOM    593  C   VAL    80     124.373 128.762  98.658  0.00  0.00           C  
ATOM    594  O   VAL    80     124.692 129.922  98.449  0.00  0.00           O  
ATOM    595  CB  VAL    80     122.145 129.238  97.485  0.00  0.00           C  
ATOM    596  CG1 VAL    80     120.955 128.505  96.919  0.00  0.00           C  
ATOM    597  CG2 VAL    80     121.705 130.555  98.244  0.00  0.00           C  
ATOM    598  N   THR    81     125.212 127.899  99.245  0.00  0.00           N  
ATOM    599  CA  THR    81     126.625 128.314  99.685  0.00  0.00           C  
ATOM    600  C   THR    81     127.641 128.373  98.516  0.00  0.00           C  
ATOM    601  O   THR    81     127.948 127.354  97.932  0.00  0.00           O  
ATOM    602  CB  THR    81     127.159 127.514 100.836  0.00  0.00           C  
ATOM    603  CG2 THR    81     128.311 128.223 101.530  0.00  0.00           C  
ATOM    604  OG1 THR    81     126.218 127.089 101.823  0.00  0.00           O  
ATOM    605  N   VAL    82     128.252 129.553  98.263  0.00  0.00           N  
ATOM    606  CA  VAL    82     129.523 129.795  97.548  0.00  0.00           C  
ATOM    607  C   VAL    82     130.717 129.659  98.563  0.00  0.00           C  
ATOM    608  O   VAL    82     130.713 130.312  99.570  0.00  0.00           O  
ATOM    609  CB  VAL    82     129.544 131.143  96.835  0.00  0.00           C  
ATOM    610  CG1 VAL    82     130.854 131.307  96.041  0.00  0.00           C  
ATOM    611  CG2 VAL    82     128.344 131.229  95.927  0.00  0.00           C  
ATOM    612  N   ALA    83     131.702 128.820  98.206  0.00  0.00           N  
ATOM    613  CA  ALA    83     132.987 128.855  98.805  0.00  0.00           C  
ATOM    614  C   ALA    83     134.142 128.300  97.883  0.00  0.00           C  
ATOM    615  O   ALA    83     134.004 127.294  97.218  0.00  0.00           O  
ATOM    616  CB  ALA    83     132.900 128.056 100.080  0.00  0.00           C  
ATOM    617  N   ASN    84     135.286 128.952  97.879  0.00  0.00           N  
ATOM    618  CA  ASN    84     136.464 128.692  97.062  0.00  0.00           C  
ATOM    619  C   ASN    84     136.185 128.228  95.599  0.00  0.00           C  
ATOM    620  O   ASN    84     136.701 127.226  95.110  0.00  0.00           O  
ATOM    621  CB  ASN    84     137.387 127.719  97.796  0.00  0.00           C  
ATOM    622  CG  ASN    84     137.834 128.233  99.228  0.00  0.00           C  
ATOM    623  ND2 ASN    84     138.284 127.346 100.127  0.00  0.00           N  
ATOM    624  OD1 ASN    84     137.998 129.418  99.484  0.00  0.00           O  
ATOM    625  N   GLY    85     135.332 128.989  94.898  0.00  0.00           N  
ATOM    626  CA  GLY    85     134.992 128.728  93.470  0.00  0.00           C  
ATOM    627  C   GLY    85     133.995 127.555  93.264  0.00  0.00           C  
ATOM    628  O   GLY    85     133.736 127.193  92.099  0.00  0.00           O  
ATOM    629  N   VAL    86     133.562 126.859  94.287  0.00  0.00           N  
ATOM    630  CA  VAL    86     132.484 125.845  94.362  0.00  0.00           C  
ATOM    631  C   VAL    86     131.173 126.414  94.867  0.00  0.00           C  
ATOM    632  O   VAL    86     131.142 127.409  95.600  0.00  0.00           O  
ATOM    633  CB  VAL    86     133.025 124.575  95.140  0.00  0.00           C  
ATOM    634  CG1 VAL    86     132.012 123.498  95.108  0.00  0.00           C  
ATOM    635  CG2 VAL    86     134.404 124.134  94.633  0.00  0.00           C  
ATOM    636  N   ILE    87     130.022 125.867  94.434  0.00  0.00           N  
ATOM    637  CA  ILE    87     128.700 126.142  94.899  0.00  0.00           C  
ATOM    638  C   ILE    87     128.268 124.765  95.512  0.00  0.00           C  
ATOM    639  O   ILE    87     128.533 123.642  94.984  0.00  0.00           O  
ATOM    640  CB  ILE    87     127.837 126.522  93.701  0.00  0.00           C  
ATOM    641  CG1 ILE    87     128.231 127.861  93.132  0.00  0.00           C  
ATOM    642  CG2 ILE    87     126.323 126.430  93.954  0.00  0.00           C  
ATOM    643  CD1 ILE    87     127.771 128.264  91.690  0.00  0.00           C  
ATOM    644  N   THR    88     127.635 124.815  96.657  0.00  0.00           N  
ATOM    645  CA  THR    88     127.072 123.718  97.379  0.00  0.00           C  
ATOM    646  C   THR    88     125.652 124.045  97.749  0.00  0.00           C  
ATOM    647  O   THR    88     125.415 125.094  98.418  0.00  0.00           O  
ATOM    648  CB  THR    88     127.923 123.309  98.633  0.00  0.00           C  
ATOM    649  CG2 THR    88     127.301 122.128  99.394  0.00  0.00           C  
ATOM    650  OG1 THR    88     129.218 123.028  98.256  0.00  0.00           O  
ATOM    651  N   ALA    89     124.739 123.148  97.451  0.00  0.00           N  
ATOM    652  CA  ALA    89     123.286 123.363  97.618  0.00  0.00           C  
ATOM    653  C   ALA    89     122.610 122.279  98.400  0.00  0.00           C  
ATOM    654  O   ALA    89     123.078 121.154  98.434  0.00  0.00           O  
ATOM    655  CB  ALA    89     122.607 123.679  96.246  0.00  0.00           C  
ATOM    656  N   GLN    90     121.445 122.504  98.973  0.00  0.00           N  
ATOM    657  CA  GLN    90     120.604 121.663  99.842  0.00  0.00           C  
ATOM    658  C   GLN    90     119.155 121.742  99.339  0.00  0.00           C  
ATOM    659  O   GLN    90     118.608 122.788  99.028  0.00  0.00           O  
ATOM    660  CB  GLN    90     120.793 122.026 101.316  0.00  0.00           C  
ATOM    661  CG  GLN    90     120.266 120.926 102.299  0.00  0.00           C  
ATOM    662  CD  GLN    90     120.610 121.174 103.759  0.00  0.00           C  
ATOM    663  NE2 GLN    90     120.467 120.150 104.593  0.00  0.00           N  
ATOM    664  OE1 GLN    90     120.986 122.198 104.244  0.00  0.00           O  
ATOM    665  N   MET    91     118.493 120.592  99.408  0.00  0.00           N  
ATOM    666  CA  MET    91     117.028 120.470  99.132  0.00  0.00           C  
ATOM    667  C   MET    91     116.183 120.812 100.374  0.00  0.00           C  
ATOM    668  O   MET    91     116.568 120.653 101.592  0.00  0.00           O  
ATOM    669  CB  MET    91     116.862 118.962  98.794  0.00  0.00           C  
ATOM    670  CG  MET    91     117.635 118.424  97.501  0.00  0.00           C  
ATOM    671  SD  MET    91     117.333 119.170  95.877  0.00  0.00           S  
ATOM    672  CE  MET    91     115.494 118.842  95.621  0.00  0.00           C  
ATOM    673  N   ALA    92     114.928 121.141 100.076  0.00  0.00           N  
ATOM    674  CA  ALA    92     113.880 121.394 101.017  0.00  0.00           C  
ATOM    675  C   ALA    92     113.585 120.091 101.901  0.00  0.00           C  
ATOM    676  O   ALA    92     113.845 118.960 101.512  0.00  0.00           O  
ATOM    677  CB  ALA    92     112.642 121.959 100.319  0.00  0.00           C  
ATOM    678  N   SER    93     112.946 120.356 103.033  0.00  0.00           N  
ATOM    679  CA  SER    93     112.503 119.405 104.023  0.00  0.00           C  
ATOM    680  C   SER    93     111.041 119.050 103.914  0.00  0.00           C  
ATOM    681  O   SER    93     110.726 117.956 104.318  0.00  0.00           O  
ATOM    682  CB  SER    93     112.759 119.914 105.410  0.00  0.00           C  
ATOM    683  OG  SER    93     112.159 121.162 105.817  0.00  0.00           O  
ATOM    684  N   SER    94     110.082 119.953 103.487  0.00  0.00           N  
ATOM    685  CA  SER    94     108.676 119.610 103.243  0.00  0.00           C  
ATOM    686  C   SER    94     108.551 119.244 101.738  0.00  0.00           C  
ATOM    687  O   SER    94     109.386 119.617 100.891  0.00  0.00           O  
ATOM    688  CB  SER    94     107.824 120.778 103.716  0.00  0.00           C  
ATOM    689  OG  SER    94     107.990 121.890 102.826  0.00  0.00           O  
ATOM    690  N   ASN    95     107.379 118.648 101.351  0.00  0.00           N  
ATOM    691  CA  ASN    95     106.903 118.706  99.942  0.00  0.00           C  
ATOM    692  C   ASN    95     107.912 118.279  98.857  0.00  0.00           C  
ATOM    693  O   ASN    95     108.038 118.894  97.740  0.00  0.00           O  
ATOM    694  CB  ASN    95     106.353 120.185  99.730  0.00  0.00           C  
ATOM    695  CG  ASN    95     105.271 120.755 100.672  0.00  0.00           C  
ATOM    696  ND2 ASN    95     104.043 120.292 100.661  0.00  0.00           N  
ATOM    697  OD1 ASN    95     105.611 121.689 101.454  0.00  0.00           O  
ATOM    698  N   VAL    96     108.646 117.170  99.102  0.00  0.00           N  
ATOM    699  CA  VAL    96     109.667 116.630  98.108  0.00  0.00           C  
ATOM    700  C   VAL    96     109.882 115.106  98.401  0.00  0.00           C  
ATOM    701  O   VAL    96     109.747 114.659  99.596  0.00  0.00           O  
ATOM    702  CB  VAL    96     110.962 117.439  98.193  0.00  0.00           C  
ATOM    703  CG1 VAL    96     111.845 117.124  99.360  0.00  0.00           C  
ATOM    704  CG2 VAL    96     111.753 117.150  96.890  0.00  0.00           C  
ATOM    705  N   ASN    97     110.218 114.258  97.434  0.00  0.00           N  
ATOM    706  CA  ASN    97     110.532 112.821  97.678  0.00  0.00           C  
ATOM    707  C   ASN    97     111.648 112.595  98.761  0.00  0.00           C  
ATOM    708  O   ASN    97     112.681 113.229  98.772  0.00  0.00           O  
ATOM    709  CB  ASN    97     110.908 112.180  96.329  0.00  0.00           C  
ATOM    710  CG  ASN    97     111.741 110.884  96.390  0.00  0.00           C  
ATOM    711  ND2 ASN    97     112.572 110.712  95.354  0.00  0.00           N  
ATOM    712  OD1 ASN    97     111.617 110.107  97.321  0.00  0.00           O  
ATOM    713  N   ASN    98     111.365 111.756  99.746  0.00  0.00           N  
ATOM    714  CA  ASN    98     112.191 111.465 100.904  0.00  0.00           C  
ATOM    715  C   ASN    98     113.588 110.949 100.554  0.00  0.00           C  
ATOM    716  O   ASN    98     114.535 111.135 101.281  0.00  0.00           O  
ATOM    717  CB  ASN    98     111.316 110.342 101.581  0.00  0.00           C  
ATOM    718  CG  ASN    98     110.000 110.802 102.240  0.00  0.00           C  
ATOM    719  ND2 ASN    98     109.050 110.019 102.471  0.00  0.00           N  
ATOM    720  OD1 ASN    98     109.870 111.948 102.604  0.00  0.00           O  
ATOM    721  N   GLU    99     113.786 110.331  99.390  0.00  0.00           N  
ATOM    722  CA  GLU    99     115.090 109.939  98.914  0.00  0.00           C  
ATOM    723  C   GLU    99     116.066 111.141  98.684  0.00  0.00           C  
ATOM    724  O   GLU    99     117.268 110.927  98.628  0.00  0.00           O  
ATOM    725  CB  GLU    99     114.961 109.186  97.687  0.00  0.00           C  
ATOM    726  CG  GLU    99     114.136 107.842  97.885  0.00  0.00           C  
ATOM    727  CD  GLU    99     114.879 106.764  98.691  0.00  0.00           C  
ATOM    728  OE1 GLU    99     116.046 106.955  99.115  0.00  0.00           O  
ATOM    729  OE2 GLU    99     114.370 105.608  98.866  0.00  0.00           O1-
ATOM    730  N   ILE   100     115.536 112.376  98.739  0.00  0.00           N  
ATOM    731  CA  ILE   100     116.234 113.641  98.364  0.00  0.00           C  
ATOM    732  C   ILE   100     115.951 114.815  99.289  0.00  0.00           C  
ATOM    733  O   ILE   100     116.638 115.815  99.376  0.00  0.00           O  
ATOM    734  CB  ILE   100     115.952 113.973  96.835  0.00  0.00           C  
ATOM    735  CG1 ILE   100     114.483 114.242  96.413  0.00  0.00           C  
ATOM    736  CG2 ILE   100     116.400 112.756  95.943  0.00  0.00           C  
ATOM    737  CD1 ILE   100     114.288 114.713  94.988  0.00  0.00           C  
ATOM    738  N   LYS   101     114.854 114.744 100.136  0.00  0.00           N  
ATOM    739  CA  LYS   101     114.375 115.570 101.260  0.00  0.00           C  
ATOM    740  C   LYS   101     115.557 115.900 102.243  0.00  0.00           C  
ATOM    741  O   LYS   101     116.124 114.893 102.742  0.00  0.00           O  
ATOM    742  CB  LYS   101     113.231 114.829 101.983  0.00  0.00           C  
ATOM    743  CG  LYS   101     112.549 115.577 103.188  0.00  0.00           C  
ATOM    744  CD  LYS   101     111.170 115.014 103.560  0.00  0.00           C  
ATOM    745  CE  LYS   101     110.044 115.344 102.613  0.00  0.00           C  
ATOM    746  NZ  LYS   101     108.802 114.618 102.790  0.00  0.00           N1+
ATOM    747  N   SER   102     115.926 117.149 102.365  0.00  0.00           N  
ATOM    748  CA  SER   102     117.043 117.718 103.073  0.00  0.00           C  
ATOM    749  C   SER   102     118.479 117.328 102.616  0.00  0.00           C  
ATOM    750  O   SER   102     119.412 117.687 103.383  0.00  0.00           O  
ATOM    751  CB  SER   102     116.807 117.475 104.551  0.00  0.00           C  
ATOM    752  OG  SER   102     115.691 118.199 105.085  0.00  0.00           O  
ATOM    753  N   LYS   103     118.764 116.523 101.536  0.00  0.00           N  
ATOM    754  CA  LYS   103     120.102 116.141 101.057  0.00  0.00           C  
ATOM    755  C   LYS   103     120.838 117.278 100.256  0.00  0.00           C  
ATOM    756  O   LYS   103     120.185 118.269  99.960  0.00  0.00           O  
ATOM    757  CB  LYS   103     119.927 114.906 100.045  0.00  0.00           C  
ATOM    758  CG  LYS   103     119.751 113.549 100.665  0.00  0.00           C  
ATOM    759  CD  LYS   103     118.487 113.351 101.568  0.00  0.00           C  
ATOM    760  CE  LYS   103     118.030 111.922 101.699  0.00  0.00           C  
ATOM    761  NZ  LYS   103     116.871 111.900 102.627  0.00  0.00           N1+
ATOM    762  N   LYS   104     122.177 117.080 100.036  0.00  0.00           N  
ATOM    763  CA  LYS   104     122.983 118.081  99.387  0.00  0.00           C  
ATOM    764  C   LYS   104     123.687 117.618  98.116  0.00  0.00           C  
ATOM    765  O   LYS   104     123.703 116.436  97.775  0.00  0.00           O  
ATOM    766  CB  LYS   104     124.041 118.545 100.459  0.00  0.00           C  
ATOM    767  CG  LYS   104     123.502 119.292 101.657  0.00  0.00           C  
ATOM    768  CD  LYS   104     124.606 119.582 102.666  0.00  0.00           C  
ATOM    769  CE  LYS   104     124.039 120.186 103.935  0.00  0.00           C  
ATOM    770  NZ  LYS   104     125.158 120.832 104.760  0.00  0.00           N1+
ATOM    771  N   LEU   105     124.250 118.601  97.372  0.00  0.00           N  
ATOM    772  CA  LEU   105     124.997 118.417  96.088  0.00  0.00           C  
ATOM    773  C   LEU   105     125.883 119.662  95.729  0.00  0.00           C  
ATOM    774  O   LEU   105     125.679 120.730  96.301  0.00  0.00           O  
ATOM    775  CB  LEU   105     123.858 118.287  94.861  0.00  0.00           C  
ATOM    776  CG  LEU   105     123.122 116.959  94.723  0.00  0.00           C  
ATOM    777  CD1 LEU   105     122.322 117.018  93.495  0.00  0.00           C  
ATOM    778  CD2 LEU   105     123.985 115.686  94.696  0.00  0.00           C  
ATOM    779  N   SER   106     126.781 119.623  94.713  0.00  0.00           N  
ATOM    780  CA  SER   106     127.656 120.742  94.346  0.00  0.00           C  
ATOM    781  C   SER   106     127.839 121.011  92.848  0.00  0.00           C  
ATOM    782  O   SER   106     127.615 120.212  91.991  0.00  0.00           O  
ATOM    783  CB  SER   106     129.021 120.379  94.935  0.00  0.00           C  
ATOM    784  OG  SER   106     129.115 120.520  96.326  0.00  0.00           O  
ATOM    785  N   LEU   107     128.349 122.161  92.556  0.00  0.00           N  
ATOM    786  CA  LEU   107     128.724 122.685  91.246  0.00  0.00           C  
ATOM    787  C   LEU   107     130.116 123.306  91.314  0.00  0.00           C  
ATOM    788  O   LEU   107     130.345 124.119  92.217  0.00  0.00           O  
ATOM    789  CB  LEU   107     127.784 123.796  90.648  0.00  0.00           C  
ATOM    790  CG  LEU   107     126.335 123.840  91.277  0.00  0.00           C  
ATOM    791  CD1 LEU   107     125.704 125.093  90.724  0.00  0.00           C  
ATOM    792  CD2 LEU   107     125.374 122.715  90.873  0.00  0.00           C  
ATOM    793  N   TRP   108     131.019 122.954  90.447  0.00  0.00           N  
ATOM    794  CA  TRP   108     132.449 123.436  90.568  0.00  0.00           C  
ATOM    795  C   TRP   108     133.021 123.677  89.144  0.00  0.00           C  
ATOM    796  O   TRP   108     132.362 123.395  88.165  0.00  0.00           O  
ATOM    797  CB  TRP   108     133.241 122.475  91.427  0.00  0.00           C  
ATOM    798  CG  TRP   108     133.293 121.061  90.928  0.00  0.00           C  
ATOM    799  CD1 TRP   108     134.173 120.559  89.993  0.00  0.00           C  
ATOM    800  CD2 TRP   108     132.289 119.979  91.040  0.00  0.00           C  
ATOM    801  CE2 TRP   108     132.650 118.867  90.185  0.00  0.00           C  
ATOM    802  CE3 TRP   108     131.029 119.954  91.647  0.00  0.00           C  
ATOM    803  NE1 TRP   108     133.856 119.240  89.681  0.00  0.00           N  
ATOM    804  CZ2 TRP   108     132.013 117.680  90.210  0.00  0.00           C  
ATOM    805  CZ3 TRP   108     130.310 118.716  91.559  0.00  0.00           C  
ATOM    806  CH2 TRP   108     130.783 117.599  90.887  0.00  0.00           C  
ATOM    807  N   ALA   109     134.282 124.191  89.017  0.00  0.00           N  
ATOM    808  CA  ALA   109     134.907 124.616  87.773  0.00  0.00           C  
ATOM    809  C   ALA   109     136.438 124.354  87.858  0.00  0.00           C  
ATOM    810  O   ALA   109     137.090 124.323  88.931  0.00  0.00           O  
ATOM    811  CB  ALA   109     134.592 126.103  87.448  0.00  0.00           C  
ATOM    812  N   LYS   110     136.971 124.071  86.656  0.00  0.00           N  
ATOM    813  CA  LYS   110     138.458 123.905  86.427  0.00  0.00           C  
ATOM    814  C   LYS   110     138.818 124.266  84.945  0.00  0.00           C  
ATOM    815  O   LYS   110     138.018 123.987  83.987  0.00  0.00           O  
ATOM    816  CB  LYS   110     138.891 122.475  86.858  0.00  0.00           C  
ATOM    817  CG  LYS   110     140.389 122.158  86.734  0.00  0.00           C  
ATOM    818  CD  LYS   110     140.819 120.833  87.412  0.00  0.00           C  
ATOM    819  CE  LYS   110     142.226 120.501  86.889  0.00  0.00           C  
ATOM    820  NZ  LYS   110     142.691 119.248  87.528  0.00  0.00           N1+
ATOM    821  N   ARG   111     140.001 124.780  84.679  0.00  0.00           N  
ATOM    822  CA  ARG   111     140.595 125.113  83.409  0.00  0.00           C  
ATOM    823  C   ARG   111     140.808 123.902  82.492  0.00  0.00           C  
ATOM    824  O   ARG   111     141.024 122.838  83.064  0.00  0.00           O  
ATOM    825  CB  ARG   111     141.892 125.910  83.515  0.00  0.00           C  
ATOM    826  CG  ARG   111     142.772 126.020  82.278  0.00  0.00           C  
ATOM    827  CD  ARG   111     143.973 126.925  82.321  0.00  0.00           C  
ATOM    828  NE  ARG   111     144.906 126.787  81.162  0.00  0.00           N  
ATOM    829  CZ  ARG   111     146.099 127.377  81.067  0.00  0.00           C  
ATOM    830  NH1 ARG   111     146.593 128.368  81.771  0.00  0.00           N1+
ATOM    831  NH2 ARG   111     146.907 126.914  80.268  0.00  0.00           N  
ATOM    832  N   GLN   112     140.818 124.124  81.201  0.00  0.00           N  
ATOM    833  CA  GLN   112     141.059 123.191  80.078  0.00  0.00           C  
ATOM    834  C   GLN   112     142.088 123.697  79.043  0.00  0.00           C  
ATOM    835  O   GLN   112     142.881 124.552  79.395  0.00  0.00           O  
ATOM    836  CB  GLN   112     139.715 122.809  79.360  0.00  0.00           C  
ATOM    837  CG  GLN   112     138.834 121.883  80.238  0.00  0.00           C  
ATOM    838  CD  GLN   112     139.513 120.619  80.545  0.00  0.00           C  
ATOM    839  NE2 GLN   112     140.088 120.542  81.711  0.00  0.00           N  
ATOM    840  OE1 GLN   112     139.712 119.742  79.738  0.00  0.00           O  
ATOM    841  N   ASN   113     142.150 123.153  77.778  0.00  0.00           N  
ATOM    842  CA  ASN   113     142.919 123.875  76.722  0.00  0.00           C  
ATOM    843  C   ASN   113     142.265 125.241  76.378  0.00  0.00           C  
ATOM    844  O   ASN   113     142.953 126.286  76.167  0.00  0.00           O  
ATOM    845  CB  ASN   113     143.018 122.917  75.497  0.00  0.00           C  
ATOM    846  CG  ASN   113     144.041 121.774  75.715  0.00  0.00           C  
ATOM    847  ND2 ASN   113     144.004 120.696  75.019  0.00  0.00           N  
ATOM    848  OD1 ASN   113     144.810 121.793  76.684  0.00  0.00           O  
ATOM    849  N   GLY   114     140.965 125.216  76.525  0.00  0.00           N  
ATOM    850  CA  GLY   114     140.092 126.448  76.521  0.00  0.00           C  
ATOM    851  C   GLY   114     139.822 126.943  77.978  0.00  0.00           C  
ATOM    852  O   GLY   114     140.162 126.190  78.938  0.00  0.00           O  
ATOM    853  N   SER   115     139.249 128.138  78.175  0.00  0.00           N  
ATOM    854  CA  SER   115     139.442 128.949  79.432  0.00  0.00           C  
ATOM    855  C   SER   115     138.829 128.319  80.712  0.00  0.00           C  
ATOM    856  O   SER   115     139.544 128.328  81.722  0.00  0.00           O  
ATOM    857  CB  SER   115     138.848 130.361  79.306  0.00  0.00           C  
ATOM    858  OG  SER   115     139.667 131.089  78.449  0.00  0.00           O  
ATOM    859  N   VAL   116     137.686 127.655  80.623  0.00  0.00           N  
ATOM    860  CA  VAL   116     137.015 126.967  81.700  0.00  0.00           C  
ATOM    861  C   VAL   116     135.894 125.979  81.306  0.00  0.00           C  
ATOM    862  O   VAL   116     135.109 126.237  80.403  0.00  0.00           O  
ATOM    863  CB  VAL   116     136.674 127.931  82.867  0.00  0.00           C  
ATOM    864  CG1 VAL   116     135.294 128.543  82.680  0.00  0.00           C  
ATOM    865  CG2 VAL   116     136.738 127.061  84.154  0.00  0.00           C  
ATOM    866  N   LYS   117     135.718 124.821  82.025  0.00  0.00           N  
ATOM    867  CA  LYS   117     134.477 123.923  81.935  0.00  0.00           C  
ATOM    868  C   LYS   117     133.728 123.951  83.348  0.00  0.00           C  
ATOM    869  O   LYS   117     134.364 124.055  84.333  0.00  0.00           O  
ATOM    870  CB  LYS   117     135.007 122.523  81.584  0.00  0.00           C  
ATOM    871  CG  LYS   117     133.750 121.546  81.486  0.00  0.00           C  
ATOM    872  CD  LYS   117     134.245 120.221  80.949  0.00  0.00           C  
ATOM    873  CE  LYS   117     133.128 119.157  80.946  0.00  0.00           C  
ATOM    874  NZ  LYS   117     133.666 117.843  80.409  0.00  0.00           N1+
ATOM    875  N   TRP   118     132.400 123.880  83.392  0.00  0.00           N  
ATOM    876  CA  TRP   118     131.560 123.673  84.613  0.00  0.00           C  
ATOM    877  C   TRP   118     131.107 122.212  84.796  0.00  0.00           C  
ATOM    878  O   TRP   118     130.845 121.522  83.794  0.00  0.00           O  
ATOM    879  CB  TRP   118     130.386 124.716  84.647  0.00  0.00           C  
ATOM    880  CG  TRP   118     130.762 126.029  85.299  0.00  0.00           C  
ATOM    881  CD1 TRP   118     131.388 127.108  84.733  0.00  0.00           C  
ATOM    882  CD2 TRP   118     130.724 126.431  86.754  0.00  0.00           C  
ATOM    883  CE2 TRP   118     131.221 127.746  86.923  0.00  0.00           C  
ATOM    884  CE3 TRP   118     130.306 125.778  87.946  0.00  0.00           C  
ATOM    885  NE1 TRP   118     131.598 128.170  85.644  0.00  0.00           N  
ATOM    886  CZ2 TRP   118     131.433 128.304  88.170  0.00  0.00           C  
ATOM    887  CZ3 TRP   118     130.505 126.329  89.217  0.00  0.00           C  
ATOM    888  CH2 TRP   118     131.057 127.601  89.341  0.00  0.00           C  
ATOM    889  N   PHE   119     131.016 121.696  85.998  0.00  0.00           N  
ATOM    890  CA  PHE   119     130.591 120.361  86.420  0.00  0.00           C  
ATOM    891  C   PHE   119     129.420 120.509  87.454  0.00  0.00           C  
ATOM    892  O   PHE   119     129.309 121.590  88.154  0.00  0.00           O  
ATOM    893  CB  PHE   119     131.863 119.779  87.032  0.00  0.00           C  
ATOM    894  CG  PHE   119     133.085 119.737  86.150  0.00  0.00           C  
ATOM    895  CD1 PHE   119     134.032 120.730  86.384  0.00  0.00           C  
ATOM    896  CD2 PHE   119     133.114 118.869  85.067  0.00  0.00           C  
ATOM    897  CE1 PHE   119     135.132 120.749  85.457  0.00  0.00           C  
ATOM    898  CE2 PHE   119     134.243 118.827  84.232  0.00  0.00           C  
ATOM    899  CZ  PHE   119     135.230 119.805  84.444  0.00  0.00           C  
ATOM    900  N   CYS   120     128.456 119.622  87.420  0.00  0.00           N  
ATOM    901  CA  CYS   120     127.300 119.577  88.211  0.00  0.00           C  
ATOM    902  C   CYS   120     127.232 118.113  88.791  0.00  0.00           C  
ATOM    903  O   CYS   120     126.945 117.193  88.044  0.00  0.00           O  
ATOM    904  CB  CYS   120     126.060 119.901  87.377  0.00  0.00           C  
ATOM    905  SG  CYS   120     125.867 121.703  87.383  0.00  0.00           S  
ATOM    906  N   GLY   121     127.353 117.933  90.085  0.00  0.00           N  
ATOM    907  CA  GLY   121     127.208 116.544  90.658  0.00  0.00           C  
ATOM    908  C   GLY   121     127.211 116.443  92.202  0.00  0.00           C  
ATOM    909  O   GLY   121     126.690 117.311  92.927  0.00  0.00           O  
ATOM    910  N   GLN   122     127.802 115.347  92.648  0.00  0.00           N  
ATOM    911  CA  GLN   122     127.808 114.947  94.103  0.00  0.00           C  
ATOM    912  C   GLN   122     128.408 115.998  95.063  0.00  0.00           C  
ATOM    913  O   GLN   122     129.049 116.950  94.548  0.00  0.00           O  
ATOM    914  CB  GLN   122     128.575 113.629  94.238  0.00  0.00           C  
ATOM    915  CG  GLN   122     130.094 113.685  94.068  0.00  0.00           C  
ATOM    916  CD  GLN   122     130.924 112.498  94.593  0.00  0.00           C  
ATOM    917  NE2 GLN   122     132.229 112.581  94.795  0.00  0.00           N  
ATOM    918  OE1 GLN   122     130.425 111.392  94.883  0.00  0.00           O  
ATOM    919  N   PRO   123     128.150 115.851  96.408  0.00  0.00           N  
ATOM    920  CA  PRO   123     128.825 116.766  97.405  0.00  0.00           C  
ATOM    921  C   PRO   123     130.365 116.827  97.272  0.00  0.00           C  
ATOM    922  O   PRO   123     131.074 115.845  97.551  0.00  0.00           O  
ATOM    923  CB  PRO   123     128.370 116.313  98.703  0.00  0.00           C  
ATOM    924  CG  PRO   123     127.063 115.547  98.502  0.00  0.00           C  
ATOM    925  CD  PRO   123     127.384 114.855  97.112  0.00  0.00           C  
ATOM    926  N   VAL   124     130.971 117.938  96.807  0.00  0.00           N  
ATOM    927  CA  VAL   124     132.398 118.249  96.734  0.00  0.00           C  
ATOM    928  C   VAL   124     132.719 119.749  97.155  0.00  0.00           C  
ATOM    929  O   VAL   124     131.787 120.567  97.102  0.00  0.00           O  
ATOM    930  CB  VAL   124     132.955 118.002  95.366  0.00  0.00           C  
ATOM    931  CG1 VAL   124     132.608 116.629  94.768  0.00  0.00           C  
ATOM    932  CG2 VAL   124     132.601 119.015  94.279  0.00  0.00           C  
ATOM    933  N   THR   125     133.910 120.013  97.662  0.00  0.00           N  
ATOM    934  CA  THR   125     134.478 121.339  97.984  0.00  0.00           C  
ATOM    935  C   THR   125     135.968 121.464  97.619  0.00  0.00           C  
ATOM    936  O   THR   125     136.685 120.467  97.446  0.00  0.00           O  
ATOM    937  CB  THR   125     134.135 121.724  99.399  0.00  0.00           C  
ATOM    938  CG2 THR   125     135.077 121.261 100.474  0.00  0.00           C  
ATOM    939  OG1 THR   125     134.321 123.191  99.422  0.00  0.00           O  
ATOM    940  N   ARG   126     136.503 122.683  97.593  0.00  0.00           N  
ATOM    941  CA  ARG   126     137.902 123.078  97.399  0.00  0.00           C  
ATOM    942  C   ARG   126     138.507 123.691  98.676  0.00  0.00           C  
ATOM    943  O   ARG   126     138.011 124.677  99.177  0.00  0.00           O  
ATOM    944  CB  ARG   126     138.082 123.895  96.102  0.00  0.00           C  
ATOM    945  CG  ARG   126     139.469 124.554  95.847  0.00  0.00           C  
ATOM    946  CD  ARG   126     139.499 125.446  94.603  0.00  0.00           C  
ATOM    947  NE  ARG   126     139.125 124.659  93.451  0.00  0.00           N  
ATOM    948  CZ  ARG   126     138.308 124.949  92.461  0.00  0.00           C  
ATOM    949  NH1 ARG   126     137.272 125.741  92.658  0.00  0.00           N1+
ATOM    950  NH2 ARG   126     138.450 124.368  91.305  0.00  0.00           N  
ATOM    951  N   THR   127     139.714 123.240  99.064  0.00  0.00           N  
ATOM    952  CA  THR   127     140.505 123.617 100.302  0.00  0.00           C  
ATOM    953  C   THR   127     141.107 125.076 100.316  0.00  0.00           C  
ATOM    954  O   THR   127     141.177 125.602 101.402  0.00  0.00           O  
ATOM    955  CB  THR   127     141.605 122.656 100.691  0.00  0.00           C  
ATOM    956  CG2 THR   127     141.742 122.541 102.229  0.00  0.00           C  
ATOM    957  OG1 THR   127     141.282 121.323 100.194  0.00  0.00           O  
ATOM    958  N   THR   128     141.426 125.637  99.176  0.00  0.00           N  
ATOM    959  CA  THR   128     141.967 126.985  99.110  0.00  0.00           C  
ATOM    960  C   THR   128     141.634 127.634  97.808  0.00  0.00           C  
ATOM    961  O   THR   128     141.768 127.041  96.755  0.00  0.00           O  
ATOM    962  CB  THR   128     143.434 127.054  99.473  0.00  0.00           C  
ATOM    963  CG2 THR   128     144.382 126.477  98.361  0.00  0.00           C  
ATOM    964  OG1 THR   128     143.694 128.438  99.526  0.00  0.00           O  
ATOM    965  N   ALA   129     141.482 128.989  97.807  0.00  0.00           N  
ATOM    966  CA  ALA   129     141.366 129.833  96.617  0.00  0.00           C  
ATOM    967  C   ALA   129     142.401 129.659  95.536  0.00  0.00           C  
ATOM    968  O   ALA   129     142.252 130.138  94.386  0.00  0.00           O  
ATOM    969  CB  ALA   129     141.291 131.266  97.165  0.00  0.00           C  
ATOM    970  N   THR   130     143.510 129.061  95.839  0.00  0.00           N  
ATOM    971  CA  THR   130     144.657 128.865  94.936  0.00  0.00           C  
ATOM    972  C   THR   130     144.655 127.521  94.109  0.00  0.00           C  
ATOM    973  O   THR   130     145.183 127.516  93.007  0.00  0.00           O  
ATOM    974  CB  THR   130     146.075 129.039  95.562  0.00  0.00           C  
ATOM    975  CG2 THR   130     146.105 130.200  96.568  0.00  0.00           C  
ATOM    976  OG1 THR   130     146.434 127.846  96.246  0.00  0.00           O  
ATOM    977  N   ALA   131     143.938 126.504  94.518  0.00  0.00           N  
ATOM    978  CA  ALA   131     143.924 125.230  93.888  0.00  0.00           C  
ATOM    979  C   ALA   131     143.163 125.186  92.614  0.00  0.00           C  
ATOM    980  O   ALA   131     141.984 125.493  92.566  0.00  0.00           O  
ATOM    981  CB  ALA   131     143.427 124.235  94.814  0.00  0.00           C  
ATOM    982  N   THR   132     143.740 124.554  91.578  0.00  0.00           N  
ATOM    983  CA  THR   132     142.954 123.967  90.461  0.00  0.00           C  
ATOM    984  C   THR   132     141.953 122.930  90.873  0.00  0.00           C  
ATOM    985  O   THR   132     140.739 123.043  90.589  0.00  0.00           O  
ATOM    986  CB  THR   132     143.939 123.486  89.403  0.00  0.00           C  
ATOM    987  CG2 THR   132     145.049 124.450  89.067  0.00  0.00           C  
ATOM    988  OG1 THR   132     144.645 122.391  89.937  0.00  0.00           O  
ATOM    989  N   ASP   133     142.397 121.906  91.555  0.00  0.00           N  
ATOM    990  CA  ASP   133     141.647 120.762  91.909  0.00  0.00           C  
ATOM    991  C   ASP   133     140.426 121.009  92.809  0.00  0.00           C  
ATOM    992  O   ASP   133     140.263 122.031  93.437  0.00  0.00           O  
ATOM    993  CB  ASP   133     142.573 119.634  92.446  0.00  0.00           C  
ATOM    994  CG  ASP   133     143.348 119.030  91.273  0.00  0.00           C  
ATOM    995  OD1 ASP   133     142.764 118.661  90.198  0.00  0.00           O  
ATOM    996  OD2 ASP   133     144.629 119.015  91.328  0.00  0.00           O1-
ATOM    997  N   VAL   134     139.511 119.968  92.955  0.00  0.00           N  
ATOM    998  CA  VAL   134     138.378 119.815  93.914  0.00  0.00           C  
ATOM    999  C   VAL   134     138.228 118.436  94.603  0.00  0.00           C  
ATOM   1000  O   VAL   134     138.469 117.461  93.997  0.00  0.00           O  
ATOM   1001  CB  VAL   134     137.018 120.242  93.205  0.00  0.00           C  
ATOM   1002  CG1 VAL   134     135.952 120.638  94.240  0.00  0.00           C  
ATOM   1003  CG2 VAL   134     137.225 121.507  92.335  0.00  0.00           C  
ATOM   1004  N   ALA   135     137.795 118.386  95.894  0.00  0.00           N  
ATOM   1005  CA  ALA   135     137.795 117.156  96.713  0.00  0.00           C  
ATOM   1006  C   ALA   135     136.316 116.680  96.969  0.00  0.00           C  
ATOM   1007  O   ALA   135     135.488 117.578  97.152  0.00  0.00           O  
ATOM   1008  CB  ALA   135     138.558 117.441  97.967  0.00  0.00           C  
ATOM   1009  N   ALA   136     136.005 115.439  97.214  0.00  0.00           N  
ATOM   1010  CA  ALA   136     134.676 114.983  97.620  0.00  0.00           C  
ATOM   1011  C   ALA   136     134.353 115.164  99.104  0.00  0.00           C  
ATOM   1012  O   ALA   136     135.198 115.148  99.966  0.00  0.00           O  
ATOM   1013  CB  ALA   136     134.628 113.562  97.175  0.00  0.00           C  
ATOM   1014  N   ALA   137     133.077 115.138  99.394  0.00  0.00           N  
ATOM   1015  CA  ALA   137     132.508 115.515 100.702  0.00  0.00           C  
ATOM   1016  C   ALA   137     131.199 114.736 101.022  0.00  0.00           C  
ATOM   1017  O   ALA   137     130.253 115.354 101.496  0.00  0.00           O  
ATOM   1018  CB  ALA   137     132.475 116.968 100.845  0.00  0.00           C  
ATOM   1019  N   ASN   138     131.151 113.449 100.640  0.00  0.00           N  
ATOM   1020  CA  ASN   138     129.880 112.591 100.486  0.00  0.00           C  
ATOM   1021  C   ASN   138     128.917 112.459 101.683  0.00  0.00           C  
ATOM   1022  O   ASN   138     127.913 111.777 101.636  0.00  0.00           O  
ATOM   1023  CB  ASN   138     130.203 111.345  99.683  0.00  0.00           C  
ATOM   1024  CG  ASN   138     130.397 111.521  98.139  0.00  0.00           C  
ATOM   1025  ND2 ASN   138     131.308 110.747  97.620  0.00  0.00           N  
ATOM   1026  OD1 ASN   138     129.747 112.240  97.410  0.00  0.00           O  
ATOM   1027  N   GLY   139     129.165 113.228 102.836  0.00  0.00           N  
ATOM   1028  CA  GLY   139     128.229 113.346 103.963  0.00  0.00           C  
ATOM   1029  C   GLY   139     127.876 112.011 104.662  0.00  0.00           C  
ATOM   1030  O   GLY   139     126.678 111.867 104.980  0.00  0.00           O  
ATOM   1031  N   LYS   140     128.743 110.992 104.745  0.00  0.00           N  
ATOM   1032  CA  LYS   140     128.497 109.612 105.264  0.00  0.00           C  
ATOM   1033  C   LYS   140     127.337 108.924 104.481  0.00  0.00           C  
ATOM   1034  O   LYS   140     126.621 108.145 105.114  0.00  0.00           O  
ATOM   1035  CB  LYS   140     128.348 109.510 106.876  0.00  0.00           C  
ATOM   1036  CG  LYS   140     129.561 109.953 107.615  0.00  0.00           C  
ATOM   1037  CD  LYS   140     129.433 109.679 109.095  0.00  0.00           C  
ATOM   1038  CE  LYS   140     130.676 110.089 109.817  0.00  0.00           C  
ATOM   1039  NZ  LYS   140     130.753 109.815 111.285  0.00  0.00           N1+
ATOM   1040  N   THR   141     127.021 109.304 103.260  0.00  0.00           N  
ATOM   1041  CA  THR   141     125.774 108.960 102.586  0.00  0.00           C  
ATOM   1042  C   THR   141     124.450 109.543 103.214  0.00  0.00           C  
ATOM   1043  O   THR   141     123.565 109.817 102.448  0.00  0.00           O  
ATOM   1044  CB  THR   141     125.568 107.532 102.196  0.00  0.00           C  
ATOM   1045  CG2 THR   141     126.968 106.810 101.987  0.00  0.00           C  
ATOM   1046  OG1 THR   141     124.967 106.830 103.200  0.00  0.00           O  
ATOM   1047  N   ASP   142     124.375 109.888 104.547  0.00  0.00           N  
ATOM   1048  CA  ASP   142     123.167 110.439 105.241  0.00  0.00           C  
ATOM   1049  C   ASP   142     122.699 111.767 104.752  0.00  0.00           C  
ATOM   1050  O   ASP   142     121.454 111.930 104.759  0.00  0.00           O  
ATOM   1051  CB  ASP   142     123.382 110.350 106.781  0.00  0.00           C  
ATOM   1052  CG  ASP   142     123.381 108.875 107.411  0.00  0.00           C  
ATOM   1053  OD1 ASP   142     122.614 107.993 107.079  0.00  0.00           O  
ATOM   1054  OD2 ASP   142     124.206 108.604 108.313  0.00  0.00           O1-
ATOM   1055  N   ASP   143     123.639 112.663 104.436  0.00  0.00           N  
ATOM   1056  CA  ASP   143     123.447 113.957 103.799  0.00  0.00           C  
ATOM   1057  C   ASP   143     123.377 113.932 102.238  0.00  0.00           C  
ATOM   1058  O   ASP   143     123.022 114.936 101.613  0.00  0.00           O  
ATOM   1059  CB  ASP   143     124.445 114.971 104.280  0.00  0.00           C  
ATOM   1060  CG  ASP   143     124.158 115.533 105.691  0.00  0.00           C  
ATOM   1061  OD1 ASP   143     123.120 115.213 106.302  0.00  0.00           O  
ATOM   1062  OD2 ASP   143     125.030 116.337 106.100  0.00  0.00           O1-
ATOM   1063  N   LYS   144     123.570 112.774 101.558  0.00  0.00           N  
ATOM   1064  CA  LYS   144     123.702 112.588 100.137  0.00  0.00           C  
ATOM   1065  C   LYS   144     122.481 111.957  99.386  0.00  0.00           C  
ATOM   1066  O   LYS   144     121.890 110.977  99.892  0.00  0.00           O  
ATOM   1067  CB  LYS   144     124.986 111.824  99.750  0.00  0.00           C  
ATOM   1068  CG  LYS   144     125.195 111.581  98.242  0.00  0.00           C  
ATOM   1069  CD  LYS   144     126.517 110.856  97.866  0.00  0.00           C  
ATOM   1070  CE  LYS   144     126.771 110.931  96.349  0.00  0.00           C  
ATOM   1071  NZ  LYS   144     128.030 110.318  96.021  0.00  0.00           N1+
ATOM   1072  N   ILE   145     122.128 112.444  98.179  0.00  0.00           N  
ATOM   1073  CA  ILE   145     121.031 111.969  97.404  0.00  0.00           C  
ATOM   1074  C   ILE   145     121.264 110.508  97.099  0.00  0.00           C  
ATOM   1075  O   ILE   145     122.371 110.060  96.870  0.00  0.00           O  
ATOM   1076  CB  ILE   145     121.088 112.642  96.036  0.00  0.00           C  
ATOM   1077  CG1 ILE   145     120.844 114.155  96.091  0.00  0.00           C  
ATOM   1078  CG2 ILE   145     120.186 111.954  94.957  0.00  0.00           C  
ATOM   1079  CD1 ILE   145     119.408 114.582  96.493  0.00  0.00           C  
ATOM   1080  N   ASN   146     120.204 109.669  97.080  0.00  0.00           N  
ATOM   1081  CA  ASN   146     120.312 108.219  96.859  0.00  0.00           C  
ATOM   1082  C   ASN   146     120.816 108.046  95.360  0.00  0.00           C  
ATOM   1083  O   ASN   146     120.375 108.750  94.429  0.00  0.00           O  
ATOM   1084  CB  ASN   146     118.931 107.589  97.122  0.00  0.00           C  
ATOM   1085  CG  ASN   146     118.712 106.145  96.736  0.00  0.00           C  
ATOM   1086  ND2 ASN   146     117.653 105.454  97.150  0.00  0.00           N  
ATOM   1087  OD1 ASN   146     119.528 105.660  96.039  0.00  0.00           O  
ATOM   1088  N   THR   147     121.836 107.172  95.156  0.00  0.00           N  
ATOM   1089  CA  THR   147     122.501 107.072  93.861  0.00  0.00           C  
ATOM   1090  C   THR   147     121.592 106.484  92.739  0.00  0.00           C  
ATOM   1091  O   THR   147     121.835 106.823  91.548  0.00  0.00           O  
ATOM   1092  CB  THR   147     123.723 106.121  93.984  0.00  0.00           C  
ATOM   1093  CG2 THR   147     124.866 106.547  93.064  0.00  0.00           C  
ATOM   1094  OG1 THR   147     124.251 106.060  95.319  0.00  0.00           O  
ATOM   1095  N   LYS   148     120.559 105.677  93.009  0.00  0.00           N  
ATOM   1096  CA  LYS   148     119.426 105.358  92.082  0.00  0.00           C  
ATOM   1097  C   LYS   148     118.621 106.503  91.534  0.00  0.00           C  
ATOM   1098  O   LYS   148     117.848 106.352  90.573  0.00  0.00           O  
ATOM   1099  CB  LYS   148     118.458 104.475  92.821  0.00  0.00           C  
ATOM   1100  CG  LYS   148     119.149 103.201  93.291  0.00  0.00           C  
ATOM   1101  CD  LYS   148     118.273 102.289  94.134  0.00  0.00           C  
ATOM   1102  CE  LYS   148     119.143 101.028  94.572  0.00  0.00           C  
ATOM   1103  NZ  LYS   148     118.370 100.077  95.450  0.00  0.00           N1+
ATOM   1104  N   HIE   149     118.621 107.619  92.250  0.00  0.00           N  
ATOM   1105  CA  HIE   149     117.729 108.773  92.184  0.00  0.00           C  
ATOM   1106  C   HIE   149     118.370 110.132  91.758  0.00  0.00           C  
ATOM   1107  O   HIE   149     117.659 111.137  91.783  0.00  0.00           O  
ATOM   1108  CB  HIE   149     116.849 108.905  93.469  0.00  0.00           C  
ATOM   1109  CG  HIE   149     115.551 108.130  93.366  0.00  0.00           C  
ATOM   1110  CD2 HIE   149     115.337 106.937  92.691  0.00  0.00           C  
ATOM   1111  ND1 HIE   149     114.476 108.401  94.154  0.00  0.00           N  
ATOM   1112  CE1 HIE   149     113.586 107.398  93.869  0.00  0.00           C  
ATOM   1113  NE2 HIE   149     114.096 106.427  93.097  0.00  0.00           N  
ATOM   1114  N   LEU   150     119.674 110.139  91.440  0.00  0.00           N  
ATOM   1115  CA  LEU   150     120.347 111.227  90.743  0.00  0.00           C  
ATOM   1116  C   LEU   150     119.730 111.592  89.380  0.00  0.00           C  
ATOM   1117  O   LEU   150     119.357 110.629  88.717  0.00  0.00           O  
ATOM   1118  CB  LEU   150     121.864 110.977  90.642  0.00  0.00           C  
ATOM   1119  CG  LEU   150     122.670 110.908  91.938  0.00  0.00           C  
ATOM   1120  CD1 LEU   150     123.967 110.084  91.760  0.00  0.00           C  
ATOM   1121  CD2 LEU   150     122.983 112.312  92.412  0.00  0.00           C  
ATOM   1122  N   PRO   151     119.517 112.876  88.971  0.00  0.00           N  
ATOM   1123  CA  PRO   151     119.145 113.197  87.580  0.00  0.00           C  
ATOM   1124  C   PRO   151     120.178 112.683  86.542  0.00  0.00           C  
ATOM   1125  O   PRO   151     121.359 112.499  86.834  0.00  0.00           O  
ATOM   1126  CB  PRO   151     119.230 114.720  87.457  0.00  0.00           C  
ATOM   1127  CG  PRO   151     119.100 115.182  88.860  0.00  0.00           C  
ATOM   1128  CD  PRO   151     119.690 114.104  89.722  0.00  0.00           C  
ATOM   1129  N   SER   152     119.726 112.339  85.325  0.00  0.00           N  
ATOM   1130  CA  SER   152     120.576 111.780  84.243  0.00  0.00           C  
ATOM   1131  C   SER   152     121.867 112.547  83.911  0.00  0.00           C  
ATOM   1132  O   SER   152     122.877 112.051  83.584  0.00  0.00           O  
ATOM   1133  CB  SER   152     119.833 111.720  82.907  0.00  0.00           C  
ATOM   1134  OG  SER   152     119.539 113.040  82.457  0.00  0.00           O  
ATOM   1135  N   THR   153     121.825 113.875  84.151  0.00  0.00           N  
ATOM   1136  CA  THR   153     122.957 114.800  83.959  0.00  0.00           C  
ATOM   1137  C   THR   153     123.821 114.934  85.116  0.00  0.00           C  
ATOM   1138  O   THR   153     125.009 114.725  85.012  0.00  0.00           O  
ATOM   1139  CB  THR   153     122.427 116.194  83.573  0.00  0.00           C  
ATOM   1140  CG2 THR   153     121.751 116.208  82.253  0.00  0.00           C  
ATOM   1141  OG1 THR   153     121.489 116.542  84.564  0.00  0.00           O  
ATOM   1142  N   CYS   154     123.303 115.291  86.321  0.00  0.00           N  
ATOM   1143  CA  CYS   154     123.878 115.830  87.514  0.00  0.00           C  
ATOM   1144  C   CYS   154     124.638 114.845  88.315  0.00  0.00           C  
ATOM   1145  O   CYS   154     124.289 114.467  89.420  0.00  0.00           O  
ATOM   1146  CB  CYS   154     122.798 116.492  88.367  0.00  0.00           C  
ATOM   1147  SG  CYS   154     121.866 117.798  87.561  0.00  0.00           S  
ATOM   1148  N   ARG   155     125.732 114.275  87.751  0.00  0.00           N  
ATOM   1149  CA  ARG   155     126.446 113.102  88.241  0.00  0.00           C  
ATOM   1150  C   ARG   155     127.930 113.180  88.068  0.00  0.00           C  
ATOM   1151  O   ARG   155     128.632 112.221  88.277  0.00  0.00           O  
ATOM   1152  CB  ARG   155     125.872 111.917  87.421  0.00  0.00           C  
ATOM   1153  CG  ARG   155     124.435 111.653  88.029  0.00  0.00           C  
ATOM   1154  CD  ARG   155     123.785 110.323  87.619  0.00  0.00           C  
ATOM   1155  NE  ARG   155     123.448 110.370  86.159  0.00  0.00           N  
ATOM   1156  CZ  ARG   155     123.272 109.294  85.367  0.00  0.00           C  
ATOM   1157  NH1 ARG   155     123.690 108.182  85.825  0.00  0.00           N1+
ATOM   1158  NH2 ARG   155     123.047 109.430  84.101  0.00  0.00           N  
ATOM   1159  N   ASP   156     128.522 114.350  87.934  0.00  0.00           N  
ATOM   1160  CA  ASP   156     129.971 114.530  88.061  0.00  0.00           C  
ATOM   1161  C   ASP   156     130.503 114.135  89.416  0.00  0.00           C  
ATOM   1162  O   ASP   156     129.770 114.120  90.429  0.00  0.00           O  
ATOM   1163  CB  ASP   156     130.315 115.980  87.741  0.00  0.00           C  
ATOM   1164  CG  ASP   156     129.966 116.263  86.253  0.00  0.00           C  
ATOM   1165  OD1 ASP   156     130.013 115.370  85.391  0.00  0.00           O  
ATOM   1166  OD2 ASP   156     129.714 117.451  85.949  0.00  0.00           O1-
ATOM   1167  N   ASP   157     131.819 113.939  89.582  0.00  0.00           N  
ATOM   1168  CA  ASP   157     132.568 113.776  90.824  0.00  0.00           C  
ATOM   1169  C   ASP   157     133.917 114.441  90.546  0.00  0.00           C  
ATOM   1170  O   ASP   157     134.253 115.087  89.581  0.00  0.00           O  
ATOM   1171  CB  ASP   157     132.701 112.205  91.104  0.00  0.00           C  
ATOM   1172  CG  ASP   157     133.531 111.341  90.048  0.00  0.00           C  
ATOM   1173  OD1 ASP   157     134.318 111.934  89.292  0.00  0.00           O  
ATOM   1174  OD2 ASP   157     133.214 110.145  90.030  0.00  0.00           O1-
ATOM   1175  N   SER   158     134.836 114.224  91.501  0.00  0.00           N  
ATOM   1176  CA  SER   158     136.162 114.773  91.525  0.00  0.00           C  
ATOM   1177  C   SER   158     137.169 114.080  90.543  0.00  0.00           C  
ATOM   1178  O   SER   158     138.301 114.522  90.592  0.00  0.00           O  
ATOM   1179  CB  SER   158     136.634 114.921  92.944  0.00  0.00           C  
ATOM   1180  OG  SER   158     136.755 113.642  93.596  0.00  0.00           O  
ATOM   1181  N   SER   159     136.722 113.189  89.708  0.00  0.00           N  
ATOM   1182  CA  SER   159     137.527 112.646  88.552  0.00  0.00           C  
ATOM   1183  C   SER   159     137.208 113.237  87.204  0.00  0.00           C  
ATOM   1184  O   SER   159     137.928 112.945  86.194  0.00  0.00           O  
ATOM   1185  CB  SER   159     137.533 111.146  88.545  0.00  0.00           C  
ATOM   1186  OG  SER   159     136.251 110.584  88.238  0.00  0.00           O  
ATOM   1187  N   ALA   160     136.144 114.030  87.214  0.00  0.00           N  
ATOM   1188  CA  ALA   160     135.601 114.620  85.994  0.00  0.00           C  
ATOM   1189  C   ALA   160     136.520 115.767  85.470  0.00  0.00           C  
ATOM   1190  O   ALA   160     137.135 116.532  86.250  0.00  0.00           O  
ATOM   1191  CB  ALA   160     134.149 115.043  86.090  0.00  0.00           C  
ATOM   1192  N   SER   161     136.518 115.978  84.154  0.00  0.00           N  
ATOM   1193  CA  SER   161     137.247 116.965  83.400  0.00  0.00           C  
ATOM   1194  C   SER   161     136.569 117.053  82.025  0.00  0.00           C  
ATOM   1195  O   SER   161     135.591 116.357  81.689  0.00  0.00           O  
ATOM   1196  CB  SER   161     138.718 116.537  83.089  0.00  0.00           C  
ATOM   1197  OG  SER   161     139.402 117.632  82.558  0.00  0.00           O  
ATOM   1198  OXT SER   161     136.908 117.940  81.212  0.00  0.00           O1-
ATOM   1199  N   PHE   162      67.810  73.546  87.475  0.00  0.00           N  
ATOM   1200  CA  PHE   162      68.524  74.703  88.073  0.00  0.00           C  
ATOM   1201  C   PHE   162      69.737  75.161  87.359  0.00  0.00           C  
ATOM   1202  O   PHE   162      70.263  76.246  87.700  0.00  0.00           O  
ATOM   1203  CB  PHE   162      68.736  74.643  89.570  0.00  0.00           C  
ATOM   1204  CG  PHE   162      67.427  74.732  90.303  0.00  0.00           C  
ATOM   1205  CD1 PHE   162      67.013  73.803  91.216  0.00  0.00           C  
ATOM   1206  CD2 PHE   162      66.462  75.725  90.074  0.00  0.00           C  
ATOM   1207  CE1 PHE   162      65.807  73.836  91.951  0.00  0.00           C  
ATOM   1208  CE2 PHE   162      65.208  75.802  90.735  0.00  0.00           C  
ATOM   1209  CZ  PHE   162      64.835  74.798  91.651  0.00  0.00           C  
ATOM   1210  N   THR   163      70.197  74.511  86.320  0.00  0.00           N  
ATOM   1211  CA  THR   163      71.487  74.869  85.658  0.00  0.00           C  
ATOM   1212  C   THR   163      71.541  76.262  84.988  0.00  0.00           C  
ATOM   1213  O   THR   163      72.600  76.837  84.943  0.00  0.00           O  
ATOM   1214  CB  THR   163      71.925  73.892  84.613  0.00  0.00           C  
ATOM   1215  CG2 THR   163      72.249  72.494  85.107  0.00  0.00           C  
ATOM   1216  OG1 THR   163      70.882  73.693  83.674  0.00  0.00           O  
ATOM   1217  N   LEU   164      70.392  76.812  84.590  0.00  0.00           N  
ATOM   1218  CA  LEU   164      70.296  78.138  83.942  0.00  0.00           C  
ATOM   1219  C   LEU   164      70.568  79.174  84.958  0.00  0.00           C  
ATOM   1220  O   LEU   164      70.869  80.301  84.578  0.00  0.00           O  
ATOM   1221  CB  LEU   164      68.931  78.446  83.367  0.00  0.00           C  
ATOM   1222  CG  LEU   164      68.285  77.293  82.567  0.00  0.00           C  
ATOM   1223  CD1 LEU   164      66.865  77.693  82.252  0.00  0.00           C  
ATOM   1224  CD2 LEU   164      69.102  77.049  81.300  0.00  0.00           C  
ATOM   1225  N   ILE   165      70.631  78.862  86.262  0.00  0.00           N  
ATOM   1226  CA  ILE   165      71.001  79.862  87.323  0.00  0.00           C  
ATOM   1227  C   ILE   165      72.483  80.325  87.082  0.00  0.00           C  
ATOM   1228  O   ILE   165      72.822  81.506  87.160  0.00  0.00           O  
ATOM   1229  CB  ILE   165      70.882  79.181  88.766  0.00  0.00           C  
ATOM   1230  CG1 ILE   165      69.379  79.215  89.079  0.00  0.00           C  
ATOM   1231  CG2 ILE   165      71.721  79.882  89.879  0.00  0.00           C  
ATOM   1232  CD1 ILE   165      68.888  78.584  90.410  0.00  0.00           C  
ATOM   1233  N   GLU   166      73.380  79.374  86.680  0.00  0.00           N  
ATOM   1234  CA  GLU   166      74.730  79.739  86.346  0.00  0.00           C  
ATOM   1235  C   GLU   166      74.855  80.897  85.293  0.00  0.00           C  
ATOM   1236  O   GLU   166      75.548  81.892  85.506  0.00  0.00           O  
ATOM   1237  CB  GLU   166      75.655  78.586  85.864  0.00  0.00           C  
ATOM   1238  CG  GLU   166      77.048  78.964  85.772  0.00  0.00           C  
ATOM   1239  CD  GLU   166      78.029  77.889  86.128  0.00  0.00           C  
ATOM   1240  OE1 GLU   166      77.668  76.702  86.280  0.00  0.00           O  
ATOM   1241  OE2 GLU   166      79.205  78.186  86.396  0.00  0.00           O1-
ATOM   1242  N   LEU   167      74.188  80.614  84.130  0.00  0.00           N  
ATOM   1243  CA  LEU   167      74.043  81.505  82.984  0.00  0.00           C  
ATOM   1244  C   LEU   167      73.398  82.869  83.362  0.00  0.00           C  
ATOM   1245  O   LEU   167      73.871  83.898  82.908  0.00  0.00           O  
ATOM   1246  CB  LEU   167      73.227  80.702  81.989  0.00  0.00           C  
ATOM   1247  CG  LEU   167      73.903  79.461  81.395  0.00  0.00           C  
ATOM   1248  CD1 LEU   167      72.919  78.751  80.468  0.00  0.00           C  
ATOM   1249  CD2 LEU   167      75.141  79.801  80.632  0.00  0.00           C  
ATOM   1250  N   MET   168      72.387  82.876  84.235  0.00  0.00           N  
ATOM   1251  CA  MET   168      71.687  84.049  84.746  0.00  0.00           C  
ATOM   1252  C   MET   168      72.585  84.857  85.650  0.00  0.00           C  
ATOM   1253  O   MET   168      72.509  86.074  85.539  0.00  0.00           O  
ATOM   1254  CB  MET   168      70.432  83.707  85.582  0.00  0.00           C  
ATOM   1255  CG  MET   168      69.301  83.271  84.748  0.00  0.00           C  
ATOM   1256  SD  MET   168      67.631  83.222  85.371  0.00  0.00           S  
ATOM   1257  CE  MET   168      67.819  81.712  86.237  0.00  0.00           C  
ATOM   1258  N   ILE   169      73.521  84.201  86.393  0.00  0.00           N  
ATOM   1259  CA  ILE   169      74.660  84.871  87.042  0.00  0.00           C  
ATOM   1260  C   ILE   169      75.632  85.552  86.032  0.00  0.00           C  
ATOM   1261  O   ILE   169      76.066  86.718  86.299  0.00  0.00           O  
ATOM   1262  CB  ILE   169      75.363  83.938  88.056  0.00  0.00           C  
ATOM   1263  CG1 ILE   169      74.389  83.640  89.264  0.00  0.00           C  
ATOM   1264  CG2 ILE   169      76.602  84.522  88.742  0.00  0.00           C  
ATOM   1265  CD1 ILE   169      74.524  82.207  89.798  0.00  0.00           C  
ATOM   1266  N   VAL   170      76.011  84.886  84.941  0.00  0.00           N  
ATOM   1267  CA  VAL   170      76.929  85.483  83.861  0.00  0.00           C  
ATOM   1268  C   VAL   170      76.465  86.871  83.352  0.00  0.00           C  
ATOM   1269  O   VAL   170      77.209  87.832  83.557  0.00  0.00           O  
ATOM   1270  CB  VAL   170      77.051  84.537  82.634  0.00  0.00           C  
ATOM   1271  CG1 VAL   170      77.704  85.058  81.329  0.00  0.00           C  
ATOM   1272  CG2 VAL   170      77.790  83.292  82.882  0.00  0.00           C  
ATOM   1273  N   ILE   171      75.263  87.015  82.860  0.00  0.00           N  
ATOM   1274  CA  ILE   171      74.668  88.271  82.342  0.00  0.00           C  
ATOM   1275  C   ILE   171      74.343  89.191  83.514  0.00  0.00           C  
ATOM   1276  O   ILE   171      74.403  90.422  83.330  0.00  0.00           O  
ATOM   1277  CB  ILE   171      73.451  87.912  81.427  0.00  0.00           C  
ATOM   1278  CG1 ILE   171      72.253  87.285  82.306  0.00  0.00           C  
ATOM   1279  CG2 ILE   171      73.605  86.839  80.264  0.00  0.00           C  
ATOM   1280  CD1 ILE   171      70.813  87.197  81.615  0.00  0.00           C  
ATOM   1281  N   ALA   172      74.111  88.780  84.751  0.00  0.00           N  
ATOM   1282  CA  ALA   172      74.050  89.659  85.924  0.00  0.00           C  
ATOM   1283  C   ALA   172      75.476  90.276  86.233  0.00  0.00           C  
ATOM   1284  O   ALA   172      75.535  91.423  86.643  0.00  0.00           O  
ATOM   1285  CB  ALA   172      73.504  88.786  87.015  0.00  0.00           C  
ATOM   1286  N   ILE   173      76.556  89.480  86.055  0.00  0.00           N  
ATOM   1287  CA  ILE   173      77.922  90.017  86.309  0.00  0.00           C  
ATOM   1288  C   ILE   173      78.335  90.989  85.232  0.00  0.00           C  
ATOM   1289  O   ILE   173      78.772  92.085  85.535  0.00  0.00           O  
ATOM   1290  CB  ILE   173      78.887  88.824  86.564  0.00  0.00           C  
ATOM   1291  CG1 ILE   173      78.526  88.077  87.859  0.00  0.00           C  
ATOM   1292  CG2 ILE   173      80.394  89.234  86.547  0.00  0.00           C  
ATOM   1293  CD1 ILE   173      79.343  86.745  87.889  0.00  0.00           C  
ATOM   1294  N   VAL   174      78.160  90.596  83.985  0.00  0.00           N  
ATOM   1295  CA  VAL   174      78.414  91.545  82.855  0.00  0.00           C  
ATOM   1296  C   VAL   174      77.488  92.755  83.016  0.00  0.00           C  
ATOM   1297  O   VAL   174      77.977  93.894  82.946  0.00  0.00           O  
ATOM   1298  CB  VAL   174      78.211  90.934  81.473  0.00  0.00           C  
ATOM   1299  CG1 VAL   174      78.669  91.927  80.384  0.00  0.00           C  
ATOM   1300  CG2 VAL   174      78.892  89.519  81.249  0.00  0.00           C  
ATOM   1301  N   GLY   175      76.214  92.620  83.443  0.00  0.00           N  
ATOM   1302  CA  GLY   175      75.505  93.824  83.849  0.00  0.00           C  
ATOM   1303  C   GLY   175      75.985  94.718  85.079  0.00  0.00           C  
ATOM   1304  O   GLY   175      75.386  95.750  85.292  0.00  0.00           O  
ATOM   1305  N   ILE   176      76.980  94.338  85.879  0.00  0.00           N  
ATOM   1306  CA  ILE   176      77.787  95.324  86.750  0.00  0.00           C  
ATOM   1307  C   ILE   176      79.163  95.678  86.139  0.00  0.00           C  
ATOM   1308  O   ILE   176      79.379  96.819  85.871  0.00  0.00           O  
ATOM   1309  CB  ILE   176      77.991  94.749  88.168  0.00  0.00           C  
ATOM   1310  CG1 ILE   176      78.526  93.276  88.342  0.00  0.00           C  
ATOM   1311  CG2 ILE   176      76.618  94.784  88.810  0.00  0.00           C  
ATOM   1312  CD1 ILE   176      78.792  92.699  89.737  0.00  0.00           C  
ATOM   1313  N   LEU   177      80.005  94.700  85.620  0.00  0.00           N  
ATOM   1314  CA  LEU   177      81.365  95.097  85.175  0.00  0.00           C  
ATOM   1315  C   LEU   177      81.475  95.996  83.946  0.00  0.00           C  
ATOM   1316  O   LEU   177      82.486  96.666  83.773  0.00  0.00           O  
ATOM   1317  CB  LEU   177      82.311  93.833  85.017  0.00  0.00           C  
ATOM   1318  CG  LEU   177      82.385  92.863  86.162  0.00  0.00           C  
ATOM   1319  CD1 LEU   177      83.191  91.644  85.671  0.00  0.00           C  
ATOM   1320  CD2 LEU   177      82.974  93.583  87.388  0.00  0.00           C  
ATOM   1321  N   ALA   178      80.445  95.997  83.081  0.00  0.00           N  
ATOM   1322  CA  ALA   178      80.558  96.388  81.653  0.00  0.00           C  
ATOM   1323  C   ALA   178      80.232  97.840  81.436  0.00  0.00           C  
ATOM   1324  O   ALA   178      80.672  98.373  80.356  0.00  0.00           O  
ATOM   1325  CB  ALA   178      79.654  95.512  80.784  0.00  0.00           C  
ATOM   1326  N   ALA   179      79.484  98.528  82.323  0.00  0.00           N  
ATOM   1327  CA  ALA   179      79.286  99.980  82.293  0.00  0.00           C  
ATOM   1328  C   ALA   179      79.113 100.561  83.687  0.00  0.00           C  
ATOM   1329  O   ALA   179      78.966  99.786  84.643  0.00  0.00           O  
ATOM   1330  CB  ALA   179      78.039 100.222  81.409  0.00  0.00           C  
ATOM   1331  N   VAL   180      79.023 101.879  83.915  0.00  0.00           N  
ATOM   1332  CA  VAL   180      78.790 102.516  85.231  0.00  0.00           C  
ATOM   1333  C   VAL   180      79.852 102.327  86.376  0.00  0.00           C  
ATOM   1334  O   VAL   180      79.958 103.147  87.275  0.00  0.00           O  
ATOM   1335  CB  VAL   180      77.390 102.258  85.744  0.00  0.00           C  
ATOM   1336  CG1 VAL   180      76.932 103.351  86.735  0.00  0.00           C  
ATOM   1337  CG2 VAL   180      76.315 102.266  84.653  0.00  0.00           C  
ATOM   1338  N   ALA   181      80.602 101.240  86.246  0.00  0.00           N  
ATOM   1339  CA  ALA   181      81.852 101.012  86.961  0.00  0.00           C  
ATOM   1340  C   ALA   181      82.909 102.074  86.505  0.00  0.00           C  
ATOM   1341  O   ALA   181      83.889 101.709  85.820  0.00  0.00           O  
ATOM   1342  CB  ALA   181      82.220  99.574  86.648  0.00  0.00           C  
ATOM   1343  N   LEU   182      82.658 103.344  86.884  0.00  0.00           N  
ATOM   1344  CA  LEU   182      83.373 104.528  86.454  0.00  0.00           C  
ATOM   1345  C   LEU   182      84.055 105.345  87.568  0.00  0.00           C  
ATOM   1346  O   LEU   182      83.602 106.487  87.884  0.00  0.00           O  
ATOM   1347  CB  LEU   182      82.386 105.336  85.592  0.00  0.00           C  
ATOM   1348  CG  LEU   182      81.631 104.677  84.413  0.00  0.00           C  
ATOM   1349  CD1 LEU   182      80.648 105.647  83.797  0.00  0.00           C  
ATOM   1350  CD2 LEU   182      82.718 104.227  83.375  0.00  0.00           C  
ATOM   1351  N   PRO   183      85.082 104.776  88.236  0.00  0.00           N  
ATOM   1352  CA  PRO   183      85.668 105.394  89.502  0.00  0.00           C  
ATOM   1353  C   PRO   183      86.345 106.710  89.193  0.00  0.00           C  
ATOM   1354  O   PRO   183      87.329 106.794  88.465  0.00  0.00           O  
ATOM   1355  CB  PRO   183      86.673 104.390  90.035  0.00  0.00           C  
ATOM   1356  CG  PRO   183      87.065 103.677  88.797  0.00  0.00           C  
ATOM   1357  CD  PRO   183      85.793 103.522  87.963  0.00  0.00           C  
ATOM   1358  N   ALA   184      85.826 107.820  89.773  0.00  0.00           N  
ATOM   1359  CA  ALA   184      86.392 109.170  89.798  0.00  0.00           C  
ATOM   1360  C   ALA   184      86.887 109.735  88.467  0.00  0.00           C  
ATOM   1361  O   ALA   184      87.561 110.782  88.412  0.00  0.00           O  
ATOM   1362  CB  ALA   184      87.458 109.127  90.867  0.00  0.00           C  
ATOM   1363  N   TYR   185      86.486 109.144  87.299  0.00  0.00           N  
ATOM   1364  CA  TYR   185      87.228 109.362  86.074  0.00  0.00           C  
ATOM   1365  C   TYR   185      87.229 110.802  85.608  0.00  0.00           C  
ATOM   1366  O   TYR   185      88.214 111.216  84.961  0.00  0.00           O  
ATOM   1367  CB  TYR   185      86.832 108.428  84.963  0.00  0.00           C  
ATOM   1368  CG  TYR   185      87.123 106.994  85.003  0.00  0.00           C  
ATOM   1369  CD1 TYR   185      88.479 106.626  85.278  0.00  0.00           C  
ATOM   1370  CD2 TYR   185      86.205 106.001  84.587  0.00  0.00           C  
ATOM   1371  CE1 TYR   185      88.844 105.271  85.356  0.00  0.00           C  
ATOM   1372  CE2 TYR   185      86.647 104.651  84.631  0.00  0.00           C  
ATOM   1373  CZ  TYR   185      87.900 104.312  85.135  0.00  0.00           C  
ATOM   1374  OH  TYR   185      88.311 103.018  85.283  0.00  0.00           O  
ATOM   1375  N   GLN   186      86.187 111.552  85.879  0.00  0.00           N  
ATOM   1376  CA  GLN   186      85.961 112.949  85.546  0.00  0.00           C  
ATOM   1377  C   GLN   186      86.973 113.905  86.230  0.00  0.00           C  
ATOM   1378  O   GLN   186      87.434 114.847  85.604  0.00  0.00           O  
ATOM   1379  CB  GLN   186      84.503 113.297  85.807  0.00  0.00           C  
ATOM   1380  CG  GLN   186      84.137 114.658  85.188  0.00  0.00           C  
ATOM   1381  CD  GLN   186      82.650 114.791  85.036  0.00  0.00           C  
ATOM   1382  NE2 GLN   186      82.268 115.392  83.974  0.00  0.00           N  
ATOM   1383  OE1 GLN   186      81.921 114.373  85.879  0.00  0.00           O  
ATOM   1384  N   ASP   187      87.322 113.666  87.511  0.00  0.00           N  
ATOM   1385  CA  ASP   187      88.324 114.476  88.286  0.00  0.00           C  
ATOM   1386  C   ASP   187      89.709 114.490  87.555  0.00  0.00           C  
ATOM   1387  O   ASP   187      90.407 115.494  87.526  0.00  0.00           O  
ATOM   1388  CB  ASP   187      88.569 113.851  89.699  0.00  0.00           C  
ATOM   1389  CG  ASP   187      87.362 113.448  90.602  0.00  0.00           C  
ATOM   1390  OD1 ASP   187      86.213 113.897  90.244  0.00  0.00           O  
ATOM   1391  OD2 ASP   187      87.513 112.750  91.572  0.00  0.00           O1-
ATOM   1392  N   TYR   188      89.999 113.375  86.934  0.00  0.00           N  
ATOM   1393  CA  TYR   188      91.302 113.279  86.207  0.00  0.00           C  
ATOM   1394  C   TYR   188      91.523 114.022  84.894  0.00  0.00           C  
ATOM   1395  O   TYR   188      92.546 114.677  84.684  0.00  0.00           O  
ATOM   1396  CB  TYR   188      91.762 111.737  86.133  0.00  0.00           C  
ATOM   1397  CG  TYR   188      92.118 111.180  87.480  0.00  0.00           C  
ATOM   1398  CD1 TYR   188      91.158 110.424  88.134  0.00  0.00           C  
ATOM   1399  CD2 TYR   188      93.324 111.492  88.041  0.00  0.00           C  
ATOM   1400  CE1 TYR   188      91.381 109.909  89.441  0.00  0.00           C  
ATOM   1401  CE2 TYR   188      93.626 110.884  89.246  0.00  0.00           C  
ATOM   1402  CZ  TYR   188      92.642 110.168  90.018  0.00  0.00           C  
ATOM   1403  OH  TYR   188      93.034 109.464  91.141  0.00  0.00           O  
ATOM   1404  N   THR   189      90.556 113.952  83.966  0.00  0.00           N  
ATOM   1405  CA  THR   189      90.503 114.921  82.883  0.00  0.00           C  
ATOM   1406  C   THR   189      90.326 116.321  83.396  0.00  0.00           C  
ATOM   1407  O   THR   189      91.033 117.249  82.892  0.00  0.00           O  
ATOM   1408  CB  THR   189      89.447 114.464  81.834  0.00  0.00           C  
ATOM   1409  CG2 THR   189      90.079 114.880  80.489  0.00  0.00           C  
ATOM   1410  OG1 THR   189      89.066 113.045  81.683  0.00  0.00           O  
ATOM   1411  N   ALA   190      89.544 116.657  84.466  0.00  0.00           N  
ATOM   1412  CA  ALA   190      89.285 117.974  84.952  0.00  0.00           C  
ATOM   1413  C   ALA   190      90.564 118.636  85.395  0.00  0.00           C  
ATOM   1414  O   ALA   190      90.680 119.780  85.021  0.00  0.00           O  
ATOM   1415  CB  ALA   190      88.186 117.838  85.998  0.00  0.00           C  
ATOM   1416  N   ARG   191      91.404 118.004  86.195  0.00  0.00           N  
ATOM   1417  CA  ARG   191      92.761 118.533  86.618  0.00  0.00           C  
ATOM   1418  C   ARG   191      93.587 118.679  85.354  0.00  0.00           C  
ATOM   1419  O   ARG   191      94.201 119.702  85.119  0.00  0.00           O  
ATOM   1420  CB  ARG   191      93.382 117.483  87.670  0.00  0.00           C  
ATOM   1421  CG  ARG   191      92.555 117.553  88.984  0.00  0.00           C  
ATOM   1422  CD  ARG   191      92.739 116.582  90.171  0.00  0.00           C  
ATOM   1423  NE  ARG   191      94.118 116.700  90.743  0.00  0.00           N  
ATOM   1424  CZ  ARG   191      95.009 115.771  90.855  0.00  0.00           C  
ATOM   1425  NH1 ARG   191      94.688 114.516  90.975  0.00  0.00           N1+
ATOM   1426  NH2 ARG   191      96.359 115.875  90.837  0.00  0.00           N  
ATOM   1427  N   ALA   192      93.555 117.699  84.436  0.00  0.00           N  
ATOM   1428  CA  ALA   192      94.349 117.844  83.179  0.00  0.00           C  
ATOM   1429  C   ALA   192      94.022 119.122  82.266  0.00  0.00           C  
ATOM   1430  O   ALA   192      94.967 119.786  81.832  0.00  0.00           O  
ATOM   1431  CB  ALA   192      94.121 116.552  82.331  0.00  0.00           C  
ATOM   1432  N   GLN   193      92.743 119.499  82.204  0.00  0.00           N  
ATOM   1433  CA  GLN   193      92.071 120.598  81.502  0.00  0.00           C  
ATOM   1434  C   GLN   193      92.529 121.872  82.165  0.00  0.00           C  
ATOM   1435  O   GLN   193      92.971 122.863  81.521  0.00  0.00           O  
ATOM   1436  CB  GLN   193      90.528 120.376  81.523  0.00  0.00           C  
ATOM   1437  CG  GLN   193      90.094 119.292  80.476  0.00  0.00           C  
ATOM   1438  CD  GLN   193      88.618 119.174  80.168  0.00  0.00           C  
ATOM   1439  NE2 GLN   193      88.319 118.541  79.076  0.00  0.00           N  
ATOM   1440  OE1 GLN   193      87.672 119.557  80.863  0.00  0.00           O  
ATOM   1441  N   VAL   194      92.570 121.882  83.497  0.00  0.00           N  
ATOM   1442  CA  VAL   194      93.032 123.046  84.297  0.00  0.00           C  
ATOM   1443  C   VAL   194      94.548 123.210  84.277  0.00  0.00           C  
ATOM   1444  O   VAL   194      95.076 124.329  84.187  0.00  0.00           O  
ATOM   1445  CB  VAL   194      92.546 123.081  85.715  0.00  0.00           C  
ATOM   1446  CG1 VAL   194      93.106 124.227  86.597  0.00  0.00           C  
ATOM   1447  CG2 VAL   194      91.044 123.016  85.880  0.00  0.00           C  
ATOM   1448  N   SER   195      95.312 122.076  84.083  0.00  0.00           N  
ATOM   1449  CA  SER   195      96.770 122.117  83.972  0.00  0.00           C  
ATOM   1450  C   SER   195      97.203 122.780  82.653  0.00  0.00           C  
ATOM   1451  O   SER   195      98.168 123.567  82.580  0.00  0.00           O  
ATOM   1452  CB  SER   195      97.351 120.723  84.064  0.00  0.00           C  
ATOM   1453  OG  SER   195      97.323 120.036  82.863  0.00  0.00           O  
ATOM   1454  N   GLU   196      96.587 122.461  81.520  0.00  0.00           N  
ATOM   1455  CA  GLU   196      96.854 123.042  80.187  0.00  0.00           C  
ATOM   1456  C   GLU   196      96.506 124.510  80.159  0.00  0.00           C  
ATOM   1457  O   GLU   196      97.250 125.228  79.524  0.00  0.00           O  
ATOM   1458  CB  GLU   196      96.091 122.287  79.074  0.00  0.00           C  
ATOM   1459  CG  GLU   196      96.146 122.893  77.690  0.00  0.00           C  
ATOM   1460  CD  GLU   196      97.486 122.669  77.008  0.00  0.00           C  
ATOM   1461  OE1 GLU   196      98.230 121.740  77.399  0.00  0.00           O  
ATOM   1462  OE2 GLU   196      97.759 123.532  76.199  0.00  0.00           O1-
ATOM   1463  N   ALA   197      95.395 124.902  80.834  0.00  0.00           N  
ATOM   1464  CA  ALA   197      95.127 126.307  81.053  0.00  0.00           C  
ATOM   1465  C   ALA   197      96.202 127.073  81.782  0.00  0.00           C  
ATOM   1466  O   ALA   197      96.555 128.126  81.308  0.00  0.00           O  
ATOM   1467  CB  ALA   197      93.751 126.573  81.768  0.00  0.00           C  
ATOM   1468  N   ILE   198      96.827 126.479  82.832  0.00  0.00           N  
ATOM   1469  CA  ILE   198      97.816 127.086  83.654  0.00  0.00           C  
ATOM   1470  C   ILE   198      99.129 127.243  82.899  0.00  0.00           C  
ATOM   1471  O   ILE   198      99.603 128.330  82.828  0.00  0.00           O  
ATOM   1472  CB  ILE   198      98.015 126.186  84.943  0.00  0.00           C  
ATOM   1473  CG1 ILE   198      96.850 126.472  85.955  0.00  0.00           C  
ATOM   1474  CG2 ILE   198      99.350 126.338  85.645  0.00  0.00           C  
ATOM   1475  CD1 ILE   198      96.815 127.862  86.492  0.00  0.00           C  
ATOM   1476  N   LEU   199      99.551 126.170  82.234  0.00  0.00           N  
ATOM   1477  CA  LEU   199     100.750 126.141  81.439  0.00  0.00           C  
ATOM   1478  C   LEU   199     100.791 127.012  80.167  0.00  0.00           C  
ATOM   1479  O   LEU   199     101.833 127.454  79.707  0.00  0.00           O  
ATOM   1480  CB  LEU   199     101.027 124.681  81.026  0.00  0.00           C  
ATOM   1481  CG  LEU   199     101.670 123.789  82.116  0.00  0.00           C  
ATOM   1482  CD1 LEU   199     101.767 122.541  81.352  0.00  0.00           C  
ATOM   1483  CD2 LEU   199     103.031 124.133  82.456  0.00  0.00           C  
ATOM   1484  N   LEU   200      99.615 127.441  79.714  0.00  0.00           N  
ATOM   1485  CA  LEU   200      99.393 128.613  78.798  0.00  0.00           C  
ATOM   1486  C   LEU   200      99.373 129.985  79.610  0.00  0.00           C  
ATOM   1487  O   LEU   200     100.149 130.867  79.269  0.00  0.00           O  
ATOM   1488  CB  LEU   200      98.084 128.321  78.072  0.00  0.00           C  
ATOM   1489  CG  LEU   200      97.635 129.297  76.985  0.00  0.00           C  
ATOM   1490  CD1 LEU   200      98.711 129.292  75.889  0.00  0.00           C  
ATOM   1491  CD2 LEU   200      96.265 129.035  76.398  0.00  0.00           C  
ATOM   1492  N   ALA   201      98.567 130.116  80.704  0.00  0.00           N  
ATOM   1493  CA  ALA   201      98.392 131.397  81.368  0.00  0.00           C  
ATOM   1494  C   ALA   201      99.705 131.847  82.091  0.00  0.00           C  
ATOM   1495  O   ALA   201      99.913 133.085  82.355  0.00  0.00           O  
ATOM   1496  CB  ALA   201      97.173 131.238  82.400  0.00  0.00           C  
ATOM   1497  N   GLU   202     100.542 130.905  82.460  0.00  0.00           N  
ATOM   1498  CA  GLU   202     101.844 131.109  83.020  0.00  0.00           C  
ATOM   1499  C   GLU   202     102.857 131.934  82.134  0.00  0.00           C  
ATOM   1500  O   GLU   202     103.732 132.608  82.713  0.00  0.00           O  
ATOM   1501  CB  GLU   202     102.491 129.696  83.393  0.00  0.00           C  
ATOM   1502  CG  GLU   202     101.969 129.281  84.815  0.00  0.00           C  
ATOM   1503  CD  GLU   202     102.991 128.361  85.491  0.00  0.00           C  
ATOM   1504  OE1 GLU   202     103.383 127.319  84.908  0.00  0.00           O  
ATOM   1505  OE2 GLU   202     103.371 128.493  86.637  0.00  0.00           O1-
ATOM   1506  N   GLY   203     102.703 131.955  80.790  0.00  0.00           N  
ATOM   1507  CA  GLY   203     103.583 132.802  79.908  0.00  0.00           C  
ATOM   1508  C   GLY   203     103.510 134.296  80.177  0.00  0.00           C  
ATOM   1509  O   GLY   203     104.488 135.012  80.017  0.00  0.00           O  
ATOM   1510  N   GLN   204     102.432 134.782  80.820  0.00  0.00           N  
ATOM   1511  CA  GLN   204     102.355 136.179  81.307  0.00  0.00           C  
ATOM   1512  C   GLN   204     103.252 136.499  82.524  0.00  0.00           C  
ATOM   1513  O   GLN   204     103.502 137.661  82.788  0.00  0.00           O  
ATOM   1514  CB  GLN   204     100.902 136.554  81.631  0.00  0.00           C  
ATOM   1515  CG  GLN   204      99.996 136.736  80.394  0.00  0.00           C  
ATOM   1516  CD  GLN   204      98.536 136.946  80.598  0.00  0.00           C  
ATOM   1517  NE2 GLN   204      97.876 137.714  79.691  0.00  0.00           N  
ATOM   1518  OE1 GLN   204      98.027 136.338  81.498  0.00  0.00           O  
ATOM   1519  N   LYS   205     103.690 135.456  83.295  0.00  0.00           N  
ATOM   1520  CA  LYS   205     104.527 135.677  84.534  0.00  0.00           C  
ATOM   1521  C   LYS   205     105.914 136.374  84.262  0.00  0.00           C  
ATOM   1522  O   LYS   205     106.348 137.235  85.007  0.00  0.00           O  
ATOM   1523  CB  LYS   205     104.802 134.333  85.224  0.00  0.00           C  
ATOM   1524  CG  LYS   205     103.634 133.815  86.129  0.00  0.00           C  
ATOM   1525  CD  LYS   205     103.905 132.449  86.650  0.00  0.00           C  
ATOM   1526  CE  LYS   205     102.811 131.948  87.628  0.00  0.00           C  
ATOM   1527  NZ  LYS   205     103.422 130.776  88.337  0.00  0.00           N1+
ATOM   1528  N   SER   206     106.609 135.970  83.232  0.00  0.00           N  
ATOM   1529  CA  SER   206     107.940 136.423  82.811  0.00  0.00           C  
ATOM   1530  C   SER   206     108.255 137.981  82.812  0.00  0.00           C  
ATOM   1531  O   SER   206     109.003 138.466  83.635  0.00  0.00           O  
ATOM   1532  CB  SER   206     108.138 135.723  81.439  0.00  0.00           C  
ATOM   1533  OG  SER   206     108.032 134.339  81.620  0.00  0.00           O  
ATOM   1534  N   ALA   207     107.533 138.768  81.951  0.00  0.00           N  
ATOM   1535  CA  ALA   207     107.698 140.195  81.722  0.00  0.00           C  
ATOM   1536  C   ALA   207     107.148 140.991  82.948  0.00  0.00           C  
ATOM   1537  O   ALA   207     107.817 141.880  83.414  0.00  0.00           O  
ATOM   1538  CB  ALA   207     106.959 140.439  80.411  0.00  0.00           C  
ATOM   1539  N   VAL   208     106.079 140.490  83.597  0.00  0.00           N  
ATOM   1540  CA  VAL   208     105.646 140.989  84.912  0.00  0.00           C  
ATOM   1541  C   VAL   208     106.818 140.937  85.922  0.00  0.00           C  
ATOM   1542  O   VAL   208     106.988 141.949  86.615  0.00  0.00           O  
ATOM   1543  CB  VAL   208     104.457 140.203  85.582  0.00  0.00           C  
ATOM   1544  CG1 VAL   208     103.977 140.673  86.952  0.00  0.00           C  
ATOM   1545  CG2 VAL   208     103.212 140.325  84.754  0.00  0.00           C  
ATOM   1546  N   THR   209     107.464 139.815  86.090  0.00  0.00           N  
ATOM   1547  CA  THR   209     108.636 139.640  86.936  0.00  0.00           C  
ATOM   1548  C   THR   209     109.773 140.592  86.521  0.00  0.00           C  
ATOM   1549  O   THR   209     110.325 141.184  87.438  0.00  0.00           O  
ATOM   1550  CB  THR   209     109.069 138.160  87.022  0.00  0.00           C  
ATOM   1551  CG2 THR   209     110.069 137.877  88.165  0.00  0.00           C  
ATOM   1552  OG1 THR   209     107.962 137.349  87.200  0.00  0.00           O  
ATOM   1553  N   GLU   210     110.221 140.510  85.260  0.00  0.00           N  
ATOM   1554  CA  GLU   210     111.271 141.322  84.779  0.00  0.00           C  
ATOM   1555  C   GLU   210     111.068 142.905  84.983  0.00  0.00           C  
ATOM   1556  O   GLU   210     111.996 143.682  85.262  0.00  0.00           O  
ATOM   1557  CB  GLU   210     111.360 141.219  83.176  0.00  0.00           C  
ATOM   1558  CG  GLU   210     112.502 141.961  82.617  0.00  0.00           C  
ATOM   1559  CD  GLU   210     112.610 141.861  81.071  0.00  0.00           C  
ATOM   1560  OE1 GLU   210     111.750 141.169  80.367  0.00  0.00           O  
ATOM   1561  OE2 GLU   210     113.377 142.551  80.416  0.00  0.00           O1-
ATOM   1562  N   TYR   211     109.845 143.430  84.793  0.00  0.00           N  
ATOM   1563  CA  TYR   211     109.399 144.779  85.158  0.00  0.00           C  
ATOM   1564  C   TYR   211     109.645 145.030  86.651  0.00  0.00           C  
ATOM   1565  O   TYR   211     110.320 145.952  86.988  0.00  0.00           O  
ATOM   1566  CB  TYR   211     108.033 145.109  84.649  0.00  0.00           C  
ATOM   1567  CG  TYR   211     107.467 146.469  84.776  0.00  0.00           C  
ATOM   1568  CD1 TYR   211     107.587 147.361  83.719  0.00  0.00           C  
ATOM   1569  CD2 TYR   211     106.924 146.822  86.004  0.00  0.00           C  
ATOM   1570  CE1 TYR   211     107.031 148.629  83.882  0.00  0.00           C  
ATOM   1571  CE2 TYR   211     106.451 148.159  86.180  0.00  0.00           C  
ATOM   1572  CZ  TYR   211     106.496 149.027  85.067  0.00  0.00           C  
ATOM   1573  OH  TYR   211     106.000 150.291  85.118  0.00  0.00           O  
ATOM   1574  N   TYR   212     109.043 144.161  87.505  0.00  0.00           N  
ATOM   1575  CA  TYR   212     109.012 144.259  88.979  0.00  0.00           C  
ATOM   1576  C   TYR   212     110.414 144.187  89.686  0.00  0.00           C  
ATOM   1577  O   TYR   212     110.775 145.179  90.353  0.00  0.00           O  
ATOM   1578  CB  TYR   212     107.956 143.423  89.746  0.00  0.00           C  
ATOM   1579  CG  TYR   212     108.274 143.345  91.259  0.00  0.00           C  
ATOM   1580  CD1 TYR   212     107.840 144.386  92.078  0.00  0.00           C  
ATOM   1581  CD2 TYR   212     109.032 142.300  91.775  0.00  0.00           C  
ATOM   1582  CE1 TYR   212     108.151 144.368  93.439  0.00  0.00           C  
ATOM   1583  CE2 TYR   212     109.380 142.265  93.143  0.00  0.00           C  
ATOM   1584  CZ  TYR   212     109.001 143.364  93.932  0.00  0.00           C  
ATOM   1585  OH  TYR   212     109.214 143.305  95.283  0.00  0.00           O  
ATOM   1586  N   LEU   213     111.254 143.217  89.238  0.00  0.00           N  
ATOM   1587  CA  LEU   213     112.600 143.197  89.721  0.00  0.00           C  
ATOM   1588  C   LEU   213     113.464 144.407  89.253  0.00  0.00           C  
ATOM   1589  O   LEU   213     114.272 144.865  90.054  0.00  0.00           O  
ATOM   1590  CB  LEU   213     113.239 141.840  89.440  0.00  0.00           C  
ATOM   1591  CG  LEU   213     112.625 140.594  90.154  0.00  0.00           C  
ATOM   1592  CD1 LEU   213     113.260 139.304  89.679  0.00  0.00           C  
ATOM   1593  CD2 LEU   213     112.725 140.610  91.668  0.00  0.00           C  
ATOM   1594  N   ASN   214     113.262 145.007  88.063  0.00  0.00           N  
ATOM   1595  CA  ASN   214     113.922 146.253  87.726  0.00  0.00           C  
ATOM   1596  C   ASN   214     113.410 147.460  88.451  0.00  0.00           C  
ATOM   1597  O   ASN   214     114.236 148.203  89.033  0.00  0.00           O  
ATOM   1598  CB  ASN   214     113.897 146.437  86.164  0.00  0.00           C  
ATOM   1599  CG  ASN   214     115.029 145.649  85.422  0.00  0.00           C  
ATOM   1600  ND2 ASN   214     114.674 144.544  84.790  0.00  0.00           N  
ATOM   1601  OD1 ASN   214     116.161 146.093  85.304  0.00  0.00           O  
ATOM   1602  N   HIE   215     112.107 147.725  88.474  0.00  0.00           N  
ATOM   1603  CA  HIE   215     111.626 149.039  88.824  0.00  0.00           C  
ATOM   1604  C   HIE   215     111.156 149.180  90.224  0.00  0.00           C  
ATOM   1605  O   HIE   215     110.956 150.327  90.626  0.00  0.00           O  
ATOM   1606  CB  HIE   215     110.528 149.459  87.862  0.00  0.00           C  
ATOM   1607  CG  HIE   215     110.927 149.295  86.446  0.00  0.00           C  
ATOM   1608  CD2 HIE   215     110.136 148.656  85.530  0.00  0.00           C  
ATOM   1609  ND1 HIE   215     112.007 149.908  85.832  0.00  0.00           N  
ATOM   1610  CE1 HIE   215     111.936 149.536  84.550  0.00  0.00           C  
ATOM   1611  NE2 HIE   215     110.789 148.869  84.324  0.00  0.00           N  
ATOM   1612  N   GLY   216     110.901 148.063  90.952  0.00  0.00           N  
ATOM   1613  CA  GLY   216     110.480 148.062  92.410  0.00  0.00           C  
ATOM   1614  C   GLY   216     109.009 148.193  92.609  0.00  0.00           C  
ATOM   1615  O   GLY   216     108.575 148.208  93.735  0.00  0.00           O  
ATOM   1616  N   GLU   217     108.186 148.359  91.531  0.00  0.00           N  
ATOM   1617  CA  GLU   217     106.697 148.411  91.541  0.00  0.00           C  
ATOM   1618  C   GLU   217     106.196 147.468  90.474  0.00  0.00           C  
ATOM   1619  O   GLU   217     106.743 147.426  89.365  0.00  0.00           O  
ATOM   1620  CB  GLU   217     106.170 149.828  91.332  0.00  0.00           C  
ATOM   1621  CG  GLU   217     106.482 150.596  90.028  0.00  0.00           C  
ATOM   1622  CD  GLU   217     106.125 151.999  89.936  0.00  0.00           C  
ATOM   1623  OE1 GLU   217     106.152 152.643  91.038  0.00  0.00           O  
ATOM   1624  OE2 GLU   217     105.939 152.534  88.792  0.00  0.00           O1-
ATOM   1625  N   TRP   218     105.107 146.762  90.753  0.00  0.00           N  
ATOM   1626  CA  TRP   218     104.373 145.883  89.842  0.00  0.00           C  
ATOM   1627  C   TRP   218     103.762 146.665  88.636  0.00  0.00           C  
ATOM   1628  O   TRP   218     103.500 147.883  88.772  0.00  0.00           O  
ATOM   1629  CB  TRP   218     103.224 145.116  90.571  0.00  0.00           C  
ATOM   1630  CG  TRP   218     103.682 144.143  91.602  0.00  0.00           C  
ATOM   1631  CD1 TRP   218     103.767 144.418  92.938  0.00  0.00           C  
ATOM   1632  CD2 TRP   218     104.390 142.885  91.423  0.00  0.00           C  
ATOM   1633  CE2 TRP   218     104.901 142.478  92.734  0.00  0.00           C  
ATOM   1634  CE3 TRP   218     104.839 142.085  90.320  0.00  0.00           C  
ATOM   1635  NE1 TRP   218     104.478 143.451  93.571  0.00  0.00           N  
ATOM   1636  CZ2 TRP   218     105.762 141.337  92.940  0.00  0.00           C  
ATOM   1637  CZ3 TRP   218     105.718 140.950  90.492  0.00  0.00           C  
ATOM   1638  CH2 TRP   218     106.079 140.551  91.787  0.00  0.00           C  
ATOM   1639  N   PRO   219     103.569 146.001  87.487  0.00  0.00           N  
ATOM   1640  CA  PRO   219     102.899 146.579  86.300  0.00  0.00           C  
ATOM   1641  C   PRO   219     101.401 146.728  86.657  0.00  0.00           C  
ATOM   1642  O   PRO   219     100.820 145.795  87.181  0.00  0.00           O  
ATOM   1643  CB  PRO   219     103.083 145.548  85.146  0.00  0.00           C  
ATOM   1644  CG  PRO   219     103.394 144.285  85.883  0.00  0.00           C  
ATOM   1645  CD  PRO   219     104.128 144.705  87.161  0.00  0.00           C  
ATOM   1646  N   GLY   220     100.777 147.908  86.429  0.00  0.00           N  
ATOM   1647  CA  GLY   220      99.445 148.216  86.679  0.00  0.00           C  
ATOM   1648  C   GLY   220      98.437 147.548  85.678  0.00  0.00           C  
ATOM   1649  O   GLY   220      97.318 147.322  86.076  0.00  0.00           O  
ATOM   1650  N   ASP   221      98.868 147.304  84.433  0.00  0.00           N  
ATOM   1651  CA  ASP   221      98.091 146.630  83.417  0.00  0.00           C  
ATOM   1652  C   ASP   221      98.969 145.764  82.405  0.00  0.00           C  
ATOM   1653  O   ASP   221     100.206 145.734  82.523  0.00  0.00           O  
ATOM   1654  CB  ASP   221      97.298 147.721  82.654  0.00  0.00           C  
ATOM   1655  CG  ASP   221      98.127 148.698  81.835  0.00  0.00           C  
ATOM   1656  OD1 ASP   221      99.374 148.649  81.772  0.00  0.00           O  
ATOM   1657  OD2 ASP   221      97.518 149.410  80.945  0.00  0.00           O1-
ATOM   1658  N   ASN   222      98.383 145.175  81.394  0.00  0.00           N  
ATOM   1659  CA  ASN   222      99.131 144.319  80.450  0.00  0.00           C  
ATOM   1660  C   ASN   222     100.205 145.109  79.660  0.00  0.00           C  
ATOM   1661  O   ASN   222     101.181 144.481  79.312  0.00  0.00           O  
ATOM   1662  CB  ASN   222      98.063 143.667  79.518  0.00  0.00           C  
ATOM   1663  CG  ASN   222      97.484 144.350  78.347  0.00  0.00           C  
ATOM   1664  ND2 ASN   222      98.143 144.290  77.193  0.00  0.00           N  
ATOM   1665  OD1 ASN   222      96.390 144.918  78.333  0.00  0.00           O  
ATOM   1666  N   SER   223      99.873 146.381  79.297  0.00  0.00           N  
ATOM   1667  CA  SER   223     100.742 147.294  78.563  0.00  0.00           C  
ATOM   1668  C   SER   223     101.942 147.652  79.310  0.00  0.00           C  
ATOM   1669  O   SER   223     103.057 147.343  78.855  0.00  0.00           O  
ATOM   1670  CB  SER   223      99.934 148.568  78.211  0.00  0.00           C  
ATOM   1671  OG  SER   223     100.686 149.522  77.458  0.00  0.00           O  
ATOM   1672  N   SER   224     101.835 148.078  80.556  0.00  0.00           N  
ATOM   1673  CA  SER   224     103.018 148.242  81.483  0.00  0.00           C  
ATOM   1674  C   SER   224     103.711 146.858  81.701  0.00  0.00           C  
ATOM   1675  O   SER   224     104.924 146.818  81.675  0.00  0.00           O  
ATOM   1676  CB  SER   224     102.588 148.944  82.811  0.00  0.00           C  
ATOM   1677  OG  SER   224     101.545 148.257  83.435  0.00  0.00           O  
ATOM   1678  N   ALA   225     103.027 145.700  81.791  0.00  0.00           N  
ATOM   1679  CA  ALA   225     103.647 144.410  81.990  0.00  0.00           C  
ATOM   1680  C   ALA   225     104.470 143.941  80.760  0.00  0.00           C  
ATOM   1681  O   ALA   225     105.364 143.112  80.854  0.00  0.00           O  
ATOM   1682  CB  ALA   225     102.500 143.475  82.321  0.00  0.00           C  
ATOM   1683  N   GLY   226     104.142 144.433  79.521  0.00  0.00           N  
ATOM   1684  CA  GLY   226     104.746 144.043  78.233  0.00  0.00           C  
ATOM   1685  C   GLY   226     104.249 142.655  77.839  0.00  0.00           C  
ATOM   1686  O   GLY   226     105.026 141.760  77.532  0.00  0.00           O  
ATOM   1687  N   VAL   227     102.874 142.421  77.974  0.00  0.00           N  
ATOM   1688  CA  VAL   227     102.127 141.223  77.614  0.00  0.00           C  
ATOM   1689  C   VAL   227     100.828 141.507  76.951  0.00  0.00           C  
ATOM   1690  O   VAL   227     100.344 142.593  77.163  0.00  0.00           O  
ATOM   1691  CB  VAL   227     101.968 140.218  78.798  0.00  0.00           C  
ATOM   1692  CG1 VAL   227     103.267 140.128  79.634  0.00  0.00           C  
ATOM   1693  CG2 VAL   227     100.729 140.540  79.646  0.00  0.00           C  
ATOM   1694  N   ALA   228     100.367 140.528  76.234  0.00  0.00           N  
ATOM   1695  CA  ALA   228      99.089 140.645  75.431  0.00  0.00           C  
ATOM   1696  C   ALA   228      97.801 140.773  76.379  0.00  0.00           C  
ATOM   1697  O   ALA   228      97.786 140.459  77.536  0.00  0.00           O  
ATOM   1698  CB  ALA   228      99.093 139.314  74.524  0.00  0.00           C  
ATOM   1699  N   THR   229      96.729 141.346  75.905  0.00  0.00           N  
ATOM   1700  CA  THR   229      95.531 141.673  76.666  0.00  0.00           C  
ATOM   1701  C   THR   229      94.547 140.565  76.947  0.00  0.00           C  
ATOM   1702  O   THR   229      94.741 139.471  76.476  0.00  0.00           O  
ATOM   1703  CB  THR   229      94.837 143.007  76.190  0.00  0.00           C  
ATOM   1704  CG2 THR   229      93.727 142.807  75.127  0.00  0.00           C  
ATOM   1705  OG1 THR   229      94.266 143.638  77.271  0.00  0.00           O  
ATOM   1706  N   SER   230      93.579 140.828  77.857  0.00  0.00           N  
ATOM   1707  CA  SER   230      92.595 139.897  78.277  0.00  0.00           C  
ATOM   1708  C   SER   230      91.842 139.168  77.184  0.00  0.00           C  
ATOM   1709  O   SER   230      91.268 138.072  77.415  0.00  0.00           O  
ATOM   1710  CB  SER   230      91.578 140.612  79.096  0.00  0.00           C  
ATOM   1711  OG  SER   230      92.213 141.385  80.161  0.00  0.00           O  
ATOM   1712  N   ALA   231      91.799 139.759  75.950  0.00  0.00           N  
ATOM   1713  CA  ALA   231      91.263 139.044  74.741  0.00  0.00           C  
ATOM   1714  C   ALA   231      92.227 137.935  74.088  0.00  0.00           C  
ATOM   1715  O   ALA   231      91.808 137.040  73.389  0.00  0.00           O  
ATOM   1716  CB  ALA   231      90.892 140.114  73.691  0.00  0.00           C  
ATOM   1717  N   ASP   232      93.485 138.118  74.334  0.00  0.00           N  
ATOM   1718  CA  ASP   232      94.597 137.584  73.553  0.00  0.00           C  
ATOM   1719  C   ASP   232      94.958 136.106  74.053  0.00  0.00           C  
ATOM   1720  O   ASP   232      94.135 135.502  74.715  0.00  0.00           O  
ATOM   1721  CB  ASP   232      95.748 138.587  73.446  0.00  0.00           C  
ATOM   1722  CG  ASP   232      95.387 139.953  72.703  0.00  0.00           C  
ATOM   1723  OD1 ASP   232      94.712 139.814  71.614  0.00  0.00           O  
ATOM   1724  OD2 ASP   232      95.898 141.021  73.139  0.00  0.00           O1-
ATOM   1725  N   ILE   233      96.055 135.484  73.615  0.00  0.00           N  
ATOM   1726  CA  ILE   233      96.673 134.198  74.096  0.00  0.00           C  
ATOM   1727  C   ILE   233      95.897 132.898  73.747  0.00  0.00           C  
ATOM   1728  O   ILE   233      96.471 131.793  73.776  0.00  0.00           O  
ATOM   1729  CB  ILE   233      97.115 134.325  75.591  0.00  0.00           C  
ATOM   1730  CG1 ILE   233      97.874 135.686  75.701  0.00  0.00           C  
ATOM   1731  CG2 ILE   233      98.091 133.214  75.960  0.00  0.00           C  
ATOM   1732  CD1 ILE   233      98.522 135.973  77.081  0.00  0.00           C  
ATOM   1733  N   LYS   234      94.581 132.990  73.434  0.00  0.00           N  
ATOM   1734  CA  LYS   234      93.613 131.846  73.310  0.00  0.00           C  
ATOM   1735  C   LYS   234      94.093 130.629  72.558  0.00  0.00           C  
ATOM   1736  O   LYS   234      94.248 130.703  71.318  0.00  0.00           O  
ATOM   1737  CB  LYS   234      92.263 132.406  72.835  0.00  0.00           C  
ATOM   1738  CG  LYS   234      91.597 133.515  73.542  0.00  0.00           C  
ATOM   1739  CD  LYS   234      90.109 133.624  73.057  0.00  0.00           C  
ATOM   1740  CE  LYS   234      89.497 134.737  73.902  0.00  0.00           C  
ATOM   1741  NZ  LYS   234      88.067 134.761  73.767  0.00  0.00           N1+
ATOM   1742  N   GLY   235      94.383 129.492  73.248  0.00  0.00           N  
ATOM   1743  CA  GLY   235      94.675 128.234  72.619  0.00  0.00           C  
ATOM   1744  C   GLY   235      93.678 127.188  73.040  0.00  0.00           C  
ATOM   1745  O   GLY   235      92.437 127.345  72.862  0.00  0.00           O  
ATOM   1746  N   LYS   236      94.162 126.118  73.759  0.00  0.00           N  
ATOM   1747  CA  LYS   236      93.316 125.140  74.469  0.00  0.00           C  
ATOM   1748  C   LYS   236      92.590 125.783  75.686  0.00  0.00           C  
ATOM   1749  O   LYS   236      93.111 126.620  76.464  0.00  0.00           O  
ATOM   1750  CB  LYS   236      94.098 123.918  74.946  0.00  0.00           C  
ATOM   1751  CG  LYS   236      94.739 123.082  73.783  0.00  0.00           C  
ATOM   1752  CD  LYS   236      93.637 122.325  73.020  0.00  0.00           C  
ATOM   1753  CE  LYS   236      94.308 121.121  72.257  0.00  0.00           C  
ATOM   1754  NZ  LYS   236      93.295 120.237  71.754  0.00  0.00           N1+
ATOM   1755  N   TYR   237      91.327 125.422  75.828  0.00  0.00           N  
ATOM   1756  CA  TYR   237      90.682 125.514  77.158  0.00  0.00           C  
ATOM   1757  C   TYR   237      90.389 126.964  77.759  0.00  0.00           C  
ATOM   1758  O   TYR   237      89.727 127.019  78.824  0.00  0.00           O  
ATOM   1759  CB  TYR   237      91.264 124.471  78.226  0.00  0.00           C  
ATOM   1760  CG  TYR   237      91.023 123.016  77.766  0.00  0.00           C  
ATOM   1761  CD1 TYR   237      92.179 122.226  77.567  0.00  0.00           C  
ATOM   1762  CD2 TYR   237      89.763 122.469  77.517  0.00  0.00           C  
ATOM   1763  CE1 TYR   237      92.044 120.913  77.112  0.00  0.00           C  
ATOM   1764  CE2 TYR   237      89.594 121.120  77.207  0.00  0.00           C  
ATOM   1765  CZ  TYR   237      90.715 120.381  76.886  0.00  0.00           C  
ATOM   1766  OH  TYR   237      90.589 119.073  76.503  0.00  0.00           O  
ATOM   1767  N   VAL   238      90.989 128.024  77.234  0.00  0.00           N  
ATOM   1768  CA  VAL   238      91.062 129.350  77.884  0.00  0.00           C  
ATOM   1769  C   VAL   238      90.318 130.389  77.082  0.00  0.00           C  
ATOM   1770  O   VAL   238      90.385 130.321  75.824  0.00  0.00           O  
ATOM   1771  CB  VAL   238      92.512 129.723  78.057  0.00  0.00           C  
ATOM   1772  CG1 VAL   238      92.711 131.151  78.517  0.00  0.00           C  
ATOM   1773  CG2 VAL   238      93.257 128.808  79.017  0.00  0.00           C  
ATOM   1774  N   GLN   239      89.857 131.466  77.754  0.00  0.00           N  
ATOM   1775  CA  GLN   239      88.940 132.455  77.158  0.00  0.00           C  
ATOM   1776  C   GLN   239      89.231 133.805  77.794  0.00  0.00           C  
ATOM   1777  O   GLN   239      88.772 134.835  77.316  0.00  0.00           O  
ATOM   1778  CB  GLN   239      87.451 132.214  77.398  0.00  0.00           C  
ATOM   1779  CG  GLN   239      86.941 131.103  76.411  0.00  0.00           C  
ATOM   1780  CD  GLN   239      87.076 131.433  74.937  0.00  0.00           C  
ATOM   1781  NE2 GLN   239      87.793 130.666  74.151  0.00  0.00           N  
ATOM   1782  OE1 GLN   239      86.578 132.417  74.360  0.00  0.00           O  
ATOM   1783  N   SER   240      89.873 133.890  78.970  0.00  0.00           N  
ATOM   1784  CA  SER   240      90.486 135.168  79.456  0.00  0.00           C  
ATOM   1785  C   SER   240      91.831 135.125  80.103  0.00  0.00           C  
ATOM   1786  O   SER   240      92.170 134.052  80.653  0.00  0.00           O  
ATOM   1787  CB  SER   240      89.560 136.022  80.325  0.00  0.00           C  
ATOM   1788  OG  SER   240      89.927 137.403  80.394  0.00  0.00           O  
ATOM   1789  N   VAL   241      92.561 136.261  80.012  0.00  0.00           N  
ATOM   1790  CA  VAL   241      94.003 136.211  80.530  0.00  0.00           C  
ATOM   1791  C   VAL   241      94.395 137.669  80.930  0.00  0.00           C  
ATOM   1792  O   VAL   241      95.106 138.475  80.219  0.00  0.00           O  
ATOM   1793  CB  VAL   241      94.949 135.766  79.378  0.00  0.00           C  
ATOM   1794  CG1 VAL   241      94.995 134.238  79.234  0.00  0.00           C  
ATOM   1795  CG2 VAL   241      94.657 136.340  77.928  0.00  0.00           C  
ATOM   1796  N   THR   242      93.825 138.121  82.044  0.00  0.00           N  
ATOM   1797  CA  THR   242      93.968 139.449  82.554  0.00  0.00           C  
ATOM   1798  C   THR   242      95.166 139.587  83.515  0.00  0.00           C  
ATOM   1799  O   THR   242      95.555 138.701  84.294  0.00  0.00           O  
ATOM   1800  CB  THR   242      92.625 139.996  83.260  0.00  0.00           C  
ATOM   1801  CG2 THR   242      92.612 141.491  83.588  0.00  0.00           C  
ATOM   1802  OG1 THR   242      91.498 139.670  82.536  0.00  0.00           O  
ATOM   1803  N   VAL   243      95.790 140.792  83.551  0.00  0.00           N  
ATOM   1804  CA  VAL   243      96.874 141.299  84.398  0.00  0.00           C  
ATOM   1805  C   VAL   243      96.774 142.681  84.995  0.00  0.00           C  
ATOM   1806  O   VAL   243      96.699 143.627  84.233  0.00  0.00           O  
ATOM   1807  CB  VAL   243      98.278 141.107  83.745  0.00  0.00           C  
ATOM   1808  CG1 VAL   243      99.398 141.147  84.866  0.00  0.00           C  
ATOM   1809  CG2 VAL   243      98.318 139.782  82.934  0.00  0.00           C  
ATOM   1810  N   ALA   244      96.840 142.803  86.334  0.00  0.00           N  
ATOM   1811  CA  ALA   244      96.764 144.072  87.044  0.00  0.00           C  
ATOM   1812  C   ALA   244      97.575 144.085  88.307  0.00  0.00           C  
ATOM   1813  O   ALA   244      97.467 143.159  89.136  0.00  0.00           O  
ATOM   1814  CB  ALA   244      95.342 144.539  87.173  0.00  0.00           C  
ATOM   1815  N   ASN   245      98.485 145.040  88.567  0.00  0.00           N  
ATOM   1816  CA  ASN   245      99.238 145.137  89.818  0.00  0.00           C  
ATOM   1817  C   ASN   245      99.977 143.853  90.330  0.00  0.00           C  
ATOM   1818  O   ASN   245     100.156 143.493  91.541  0.00  0.00           O  
ATOM   1819  CB  ASN   245      98.349 145.605  90.952  0.00  0.00           C  
ATOM   1820  CG  ASN   245      97.661 146.927  90.715  0.00  0.00           C  
ATOM   1821  ND2 ASN   245      96.531 147.201  91.325  0.00  0.00           N  
ATOM   1822  OD1 ASN   245      98.268 147.823  90.139  0.00  0.00           O  
ATOM   1823  N   GLY   246     100.488 143.132  89.331  0.00  0.00           N  
ATOM   1824  CA  GLY   246     101.278 141.969  89.545  0.00  0.00           C  
ATOM   1825  C   GLY   246     100.508 140.618  89.599  0.00  0.00           C  
ATOM   1826  O   GLY   246     101.064 139.530  89.410  0.00  0.00           O  
ATOM   1827  N   VAL   247      99.152 140.793  89.706  0.00  0.00           N  
ATOM   1828  CA  VAL   247      98.202 139.655  89.713  0.00  0.00           C  
ATOM   1829  C   VAL   247      97.796 139.334  88.288  0.00  0.00           C  
ATOM   1830  O   VAL   247      97.428 140.237  87.526  0.00  0.00           O  
ATOM   1831  CB  VAL   247      96.982 139.846  90.597  0.00  0.00           C  
ATOM   1832  CG1 VAL   247      96.019 138.568  90.582  0.00  0.00           C  
ATOM   1833  CG2 VAL   247      97.415 140.221  92.001  0.00  0.00           C  
ATOM   1834  N   ILE   248      97.802 138.076  87.959  0.00  0.00           N  
ATOM   1835  CA  ILE   248      97.295 137.512  86.679  0.00  0.00           C  
ATOM   1836  C   ILE   248      95.999 136.689  86.941  0.00  0.00           C  
ATOM   1837  O   ILE   248      95.985 135.874  87.883  0.00  0.00           O  
ATOM   1838  CB  ILE   248      98.329 136.564  85.959  0.00  0.00           C  
ATOM   1839  CG1 ILE   248      99.727 137.178  85.678  0.00  0.00           C  
ATOM   1840  CG2 ILE   248      97.756 135.744  84.760  0.00  0.00           C  
ATOM   1841  CD1 ILE   248     100.795 136.118  85.678  0.00  0.00           C  
ATOM   1842  N   THR   249      94.854 136.924  86.289  0.00  0.00           N  
ATOM   1843  CA  THR   249      93.536 136.284  86.523  0.00  0.00           C  
ATOM   1844  C   THR   249      92.948 135.837  85.178  0.00  0.00           C  
ATOM   1845  O   THR   249      92.633 136.582  84.244  0.00  0.00           O  
ATOM   1846  CB  THR   249      92.528 137.249  87.273  0.00  0.00           C  
ATOM   1847  CG2 THR   249      91.252 136.540  87.725  0.00  0.00           C  
ATOM   1848  OG1 THR   249      93.190 137.676  88.430  0.00  0.00           O  
ATOM   1849  N   ALA   250      92.740 134.492  85.087  0.00  0.00           N  
ATOM   1850  CA  ALA   250      92.292 133.821  83.865  0.00  0.00           C  
ATOM   1851  C   ALA   250      90.809 133.219  83.887  0.00  0.00           C  
ATOM   1852  O   ALA   250      90.319 132.958  84.927  0.00  0.00           O  
ATOM   1853  CB  ALA   250      93.359 132.761  83.412  0.00  0.00           C  
ATOM   1854  N   GLN   251      90.159 132.974  82.756  0.00  0.00           N  
ATOM   1855  CA  GLN   251      88.934 132.249  82.609  0.00  0.00           C  
ATOM   1856  C   GLN   251      89.012 131.050  81.664  0.00  0.00           C  
ATOM   1857  O   GLN   251      89.501 131.154  80.547  0.00  0.00           O  
ATOM   1858  CB  GLN   251      87.788 133.269  82.214  0.00  0.00           C  
ATOM   1859  CG  GLN   251      86.366 132.662  82.343  0.00  0.00           C  
ATOM   1860  CD  GLN   251      85.284 133.725  82.183  0.00  0.00           C  
ATOM   1861  NE2 GLN   251      84.148 133.643  82.826  0.00  0.00           N  
ATOM   1862  OE1 GLN   251      85.516 134.790  81.583  0.00  0.00           O  
ATOM   1863  N   MET   252      88.439 129.953  82.067  0.00  0.00           N  
ATOM   1864  CA  MET   252      88.290 128.781  81.198  0.00  0.00           C  
ATOM   1865  C   MET   252      87.202 128.958  80.111  0.00  0.00           C  
ATOM   1866  O   MET   252      86.399 129.904  80.100  0.00  0.00           O  
ATOM   1867  CB  MET   252      87.906 127.587  82.068  0.00  0.00           C  
ATOM   1868  CG  MET   252      88.834 127.299  83.252  0.00  0.00           C  
ATOM   1869  SD  MET   252      90.521 126.650  82.878  0.00  0.00           S  
ATOM   1870  CE  MET   252      90.020 125.236  81.988  0.00  0.00           C  
ATOM   1871  N   ALA   253      87.227 128.032  79.116  0.00  0.00           N  
ATOM   1872  CA  ALA   253      86.142 127.875  78.031  0.00  0.00           C  
ATOM   1873  C   ALA   253      84.690 127.706  78.641  0.00  0.00           C  
ATOM   1874  O   ALA   253      84.518 127.107  79.690  0.00  0.00           O  
ATOM   1875  CB  ALA   253      86.519 126.700  77.229  0.00  0.00           C  
ATOM   1876  N   SER   254      83.727 128.203  77.874  0.00  0.00           N  
ATOM   1877  CA  SER   254      82.238 128.038  77.845  0.00  0.00           C  
ATOM   1878  C   SER   254      81.667 126.743  77.170  0.00  0.00           C  
ATOM   1879  O   SER   254      80.465 126.425  77.273  0.00  0.00           O  
ATOM   1880  CB  SER   254      81.612 129.325  77.335  0.00  0.00           C  
ATOM   1881  OG  SER   254      81.730 129.665  76.011  0.00  0.00           O  
ATOM   1882  N   SER   255      82.624 125.927  76.573  0.00  0.00           N  
ATOM   1883  CA  SER   255      82.226 124.701  75.860  0.00  0.00           C  
ATOM   1884  C   SER   255      83.359 123.785  75.700  0.00  0.00           C  
ATOM   1885  O   SER   255      84.513 124.112  76.184  0.00  0.00           O  
ATOM   1886  CB  SER   255      81.561 124.958  74.502  0.00  0.00           C  
ATOM   1887  OG  SER   255      82.543 125.616  73.650  0.00  0.00           O  
ATOM   1888  N   ASN   256      83.172 122.562  75.244  0.00  0.00           N  
ATOM   1889  CA  ASN   256      84.272 121.566  75.049  0.00  0.00           C  
ATOM   1890  C   ASN   256      85.169 121.242  76.253  0.00  0.00           C  
ATOM   1891  O   ASN   256      86.384 121.187  76.038  0.00  0.00           O  
ATOM   1892  CB  ASN   256      84.972 121.772  73.660  0.00  0.00           C  
ATOM   1893  CG  ASN   256      84.047 121.560  72.480  0.00  0.00           C  
ATOM   1894  ND2 ASN   256      83.536 120.336  72.233  0.00  0.00           N  
ATOM   1895  OD1 ASN   256      83.629 122.589  71.849  0.00  0.00           O  
ATOM   1896  N   VAL   257      84.516 121.315  77.433  0.00  0.00           N  
ATOM   1897  CA  VAL   257      85.171 121.369  78.776  0.00  0.00           C  
ATOM   1898  C   VAL   257      84.301 120.974  80.016  0.00  0.00           C  
ATOM   1899  O   VAL   257      83.100 121.315  80.050  0.00  0.00           O  
ATOM   1900  CB  VAL   257      85.878 122.687  79.081  0.00  0.00           C  
ATOM   1901  CG1 VAL   257      84.997 123.781  79.645  0.00  0.00           C  
ATOM   1902  CG2 VAL   257      87.029 122.582  80.029  0.00  0.00           C  
ATOM   1903  N   ASN   258      84.824 120.289  81.020  0.00  0.00           N  
ATOM   1904  CA  ASN   258      83.993 119.857  82.172  0.00  0.00           C  
ATOM   1905  C   ASN   258      83.068 120.947  82.836  0.00  0.00           C  
ATOM   1906  O   ASN   258      83.464 122.076  83.081  0.00  0.00           O  
ATOM   1907  CB  ASN   258      84.969 118.984  83.124  0.00  0.00           C  
ATOM   1908  CG  ASN   258      84.569 118.903  84.556  0.00  0.00           C  
ATOM   1909  ND2 ASN   258      85.484 119.149  85.403  0.00  0.00           N  
ATOM   1910  OD1 ASN   258      83.468 118.746  84.883  0.00  0.00           O  
ATOM   1911  N   ASN   259      81.818 120.639  83.162  0.00  0.00           N  
ATOM   1912  CA  ASN   259      80.886 121.674  83.633  0.00  0.00           C  
ATOM   1913  C   ASN   259      81.198 122.160  85.107  0.00  0.00           C  
ATOM   1914  O   ASN   259      80.725 123.252  85.436  0.00  0.00           O  
ATOM   1915  CB  ASN   259      79.447 121.072  83.587  0.00  0.00           C  
ATOM   1916  CG  ASN   259      78.854 120.831  82.278  0.00  0.00           C  
ATOM   1917  ND2 ASN   259      78.123 119.834  81.991  0.00  0.00           N  
ATOM   1918  OD1 ASN   259      79.135 121.527  81.335  0.00  0.00           O  
ATOM   1919  N   GLU   260      81.902 121.450  85.962  0.00  0.00           N  
ATOM   1920  CA  GLU   260      82.541 121.992  87.144  0.00  0.00           C  
ATOM   1921  C   GLU   260      83.543 123.073  86.897  0.00  0.00           C  
ATOM   1922  O   GLU   260      83.697 123.979  87.740  0.00  0.00           O  
ATOM   1923  CB  GLU   260      83.234 120.833  87.759  0.00  0.00           C  
ATOM   1924  CG  GLU   260      82.268 119.765  88.252  0.00  0.00           C  
ATOM   1925  CD  GLU   260      81.207 120.213  89.266  0.00  0.00           C  
ATOM   1926  OE1 GLU   260      81.383 121.281  89.852  0.00  0.00           O  
ATOM   1927  OE2 GLU   260      80.279 119.414  89.592  0.00  0.00           O1-
ATOM   1928  N   ILE   261      84.089 123.195  85.661  0.00  0.00           N  
ATOM   1929  CA  ILE   261      85.170 124.125  85.344  0.00  0.00           C  
ATOM   1930  C   ILE   261      84.908 124.973  84.050  0.00  0.00           C  
ATOM   1931  O   ILE   261      85.593 126.002  83.937  0.00  0.00           O  
ATOM   1932  CB  ILE   261      86.502 123.440  85.300  0.00  0.00           C  
ATOM   1933  CG1 ILE   261      86.722 122.475  84.055  0.00  0.00           C  
ATOM   1934  CG2 ILE   261      86.863 122.710  86.584  0.00  0.00           C  
ATOM   1935  CD1 ILE   261      88.147 121.937  83.873  0.00  0.00           C  
ATOM   1936  N   LYS   262      83.826 124.790  83.353  0.00  0.00           N  
ATOM   1937  CA  LYS   262      83.244 125.540  82.313  0.00  0.00           C  
ATOM   1938  C   LYS   262      82.903 126.933  82.816  0.00  0.00           C  
ATOM   1939  O   LYS   262      81.992 127.124  83.602  0.00  0.00           O  
ATOM   1940  CB  LYS   262      82.059 124.817  81.780  0.00  0.00           C  
ATOM   1941  CG  LYS   262      81.333 125.530  80.726  0.00  0.00           C  
ATOM   1942  CD  LYS   262      80.164 124.748  80.166  0.00  0.00           C  
ATOM   1943  CE  LYS   262      80.645 123.592  79.240  0.00  0.00           C  
ATOM   1944  NZ  LYS   262      79.507 122.764  78.798  0.00  0.00           N1+
ATOM   1945  N   SER   263      83.688 127.913  82.291  0.00  0.00           N  
ATOM   1946  CA  SER   263      83.631 129.367  82.521  0.00  0.00           C  
ATOM   1947  C   SER   263      84.108 129.824  83.902  0.00  0.00           C  
ATOM   1948  O   SER   263      83.917 130.979  84.226  0.00  0.00           O  
ATOM   1949  CB  SER   263      82.246 129.901  82.230  0.00  0.00           C  
ATOM   1950  OG  SER   263      81.780 129.756  80.894  0.00  0.00           O  
ATOM   1951  N   LYS   264      84.762 128.964  84.707  0.00  0.00           N  
ATOM   1952  CA  LYS   264      85.362 129.296  85.984  0.00  0.00           C  
ATOM   1953  C   LYS   264      86.796 129.965  85.819  0.00  0.00           C  
ATOM   1954  O   LYS   264      87.437 129.970  84.800  0.00  0.00           O  
ATOM   1955  CB  LYS   264      85.305 128.115  86.922  0.00  0.00           C  
ATOM   1956  CG  LYS   264      84.032 127.641  87.588  0.00  0.00           C  
ATOM   1957  CD  LYS   264      82.948 127.257  86.546  0.00  0.00           C  
ATOM   1958  CE  LYS   264      81.827 126.548  87.341  0.00  0.00           C  
ATOM   1959  NZ  LYS   264      80.803 125.961  86.407  0.00  0.00           N1+
ATOM   1960  N   LYS   265      87.160 130.646  86.881  0.00  0.00           N  
ATOM   1961  CA  LYS   265      88.271 131.550  87.085  0.00  0.00           C  
ATOM   1962  C   LYS   265      89.381 131.154  88.043  0.00  0.00           C  
ATOM   1963  O   LYS   265      89.057 130.436  89.018  0.00  0.00           O  
ATOM   1964  CB  LYS   265      87.704 132.920  87.376  0.00  0.00           C  
ATOM   1965  CG  LYS   265      86.726 133.466  86.250  0.00  0.00           C  
ATOM   1966  CD  LYS   265      86.145 134.838  86.549  0.00  0.00           C  
ATOM   1967  CE  LYS   265      84.766 135.025  85.886  0.00  0.00           C  
ATOM   1968  NZ  LYS   265      84.059 136.268  86.305  0.00  0.00           N1+
ATOM   1969  N   LEU   266      90.578 131.537  87.831  0.00  0.00           N  
ATOM   1970  CA  LEU   266      91.698 131.268  88.730  0.00  0.00           C  
ATOM   1971  C   LEU   266      92.675 132.452  88.601  0.00  0.00           C  
ATOM   1972  O   LEU   266      92.614 133.114  87.638  0.00  0.00           O  
ATOM   1973  CB  LEU   266      92.484 129.985  88.432  0.00  0.00           C  
ATOM   1974  CG  LEU   266      91.798 128.639  88.695  0.00  0.00           C  
ATOM   1975  CD1 LEU   266      92.718 127.647  87.967  0.00  0.00           C  
ATOM   1976  CD2 LEU   266      91.640 128.362  90.213  0.00  0.00           C  
ATOM   1977  N   SER   267      93.558 132.585  89.631  0.00  0.00           N  
ATOM   1978  CA  SER   267      94.555 133.630  89.692  0.00  0.00           C  
ATOM   1979  C   SER   267      95.968 133.105  89.986  0.00  0.00           C  
ATOM   1980  O   SER   267      96.116 132.135  90.705  0.00  0.00           O  
ATOM   1981  CB  SER   267      94.345 134.794  90.699  0.00  0.00           C  
ATOM   1982  OG  SER   267      93.124 135.555  90.398  0.00  0.00           O  
ATOM   1983  N   LEU   268      97.021 133.859  89.566  0.00  0.00           N  
ATOM   1984  CA  LEU   268      98.499 133.587  89.732  0.00  0.00           C  
ATOM   1985  C   LEU   268      99.054 134.928  90.347  0.00  0.00           C  
ATOM   1986  O   LEU   268      98.715 135.979  89.923  0.00  0.00           O  
ATOM   1987  CB  LEU   268      99.218 133.320  88.411  0.00  0.00           C  
ATOM   1988  CG  LEU   268      98.353 132.370  87.407  0.00  0.00           C  
ATOM   1989  CD1 LEU   268      99.138 132.136  86.127  0.00  0.00           C  
ATOM   1990  CD2 LEU   268      98.054 130.977  87.984  0.00  0.00           C  
ATOM   1991  N   TRP   269      99.880 134.962  91.414  0.00  0.00           N  
ATOM   1992  CA  TRP   269     100.358 136.193  92.120  0.00  0.00           C  
ATOM   1993  C   TRP   269     101.830 136.070  92.667  0.00  0.00           C  
ATOM   1994  O   TRP   269     102.394 134.978  92.725  0.00  0.00           O  
ATOM   1995  CB  TRP   269      99.435 136.673  93.264  0.00  0.00           C  
ATOM   1996  CG  TRP   269      99.082 135.755  94.427  0.00  0.00           C  
ATOM   1997  CD1 TRP   269      99.837 135.688  95.567  0.00  0.00           C  
ATOM   1998  CD2 TRP   269      98.223 134.593  94.431  0.00  0.00           C  
ATOM   1999  CE2 TRP   269      98.323 133.978  95.762  0.00  0.00           C  
ATOM   2000  CE3 TRP   269      97.290 134.079  93.534  0.00  0.00           C  
ATOM   2001  NE1 TRP   269      99.379 134.668  96.393  0.00  0.00           N  
ATOM   2002  CZ2 TRP   269      97.556 132.887  96.155  0.00  0.00           C  
ATOM   2003  CZ3 TRP   269      96.549 132.980  93.882  0.00  0.00           C  
ATOM   2004  CH2 TRP   269      96.750 132.384  95.174  0.00  0.00           C  
ATOM   2005  N   ALA   270     102.419 137.231  93.044  0.00  0.00           N  
ATOM   2006  CA  ALA   270     103.770 137.098  93.583  0.00  0.00           C  
ATOM   2007  C   ALA   270     104.088 138.017  94.789  0.00  0.00           C  
ATOM   2008  O   ALA   270     103.544 139.129  94.873  0.00  0.00           O  
ATOM   2009  CB  ALA   270     104.777 137.302  92.387  0.00  0.00           C  
ATOM   2010  N   LYS   271     104.963 137.543  95.670  0.00  0.00           N  
ATOM   2011  CA  LYS   271     105.310 138.338  96.860  0.00  0.00           C  
ATOM   2012  C   LYS   271     106.834 138.072  97.179  0.00  0.00           C  
ATOM   2013  O   LYS   271     107.280 136.958  96.910  0.00  0.00           O  
ATOM   2014  CB  LYS   271     104.402 138.012  98.040  0.00  0.00           C  
ATOM   2015  CG  LYS   271     104.716 138.586  99.413  0.00  0.00           C  
ATOM   2016  CD  LYS   271     103.596 138.578 100.466  0.00  0.00           C  
ATOM   2017  CE  LYS   271     104.057 139.261 101.792  0.00  0.00           C  
ATOM   2018  NZ  LYS   271     103.040 139.187 102.917  0.00  0.00           N1+
ATOM   2019  N   ARG   272     107.589 138.987  97.804  0.00  0.00           N  
ATOM   2020  CA  ARG   272     109.008 138.765  98.153  0.00  0.00           C  
ATOM   2021  C   ARG   272     109.184 137.643  99.263  0.00  0.00           C  
ATOM   2022  O   ARG   272     108.372 137.671 100.224  0.00  0.00           O  
ATOM   2023  CB  ARG   272     109.807 140.071  98.509  0.00  0.00           C  
ATOM   2024  CG  ARG   272     111.265 139.907  99.067  0.00  0.00           C  
ATOM   2025  CD  ARG   272     111.933 141.225  99.450  0.00  0.00           C  
ATOM   2026  NE  ARG   272     113.246 140.980  99.944  0.00  0.00           N  
ATOM   2027  CZ  ARG   272     114.148 141.882 100.193  0.00  0.00           C  
ATOM   2028  NH1 ARG   272     113.962 143.133  99.883  0.00  0.00           N1+
ATOM   2029  NH2 ARG   272     115.307 141.554 100.672  0.00  0.00           N  
ATOM   2030  N   GLN   273     110.331 136.961  99.227  0.00  0.00           N  
ATOM   2031  CA  GLN   273     110.788 136.016 100.198  0.00  0.00           C  
ATOM   2032  C   GLN   273     112.274 136.115 100.258  0.00  0.00           C  
ATOM   2033  O   GLN   273     112.907 137.101  99.869  0.00  0.00           O  
ATOM   2034  CB  GLN   273     110.237 134.600  99.878  0.00  0.00           C  
ATOM   2035  CG  GLN   273     108.717 134.343 100.177  0.00  0.00           C  
ATOM   2036  CD  GLN   273     108.255 134.523 101.633  0.00  0.00           C  
ATOM   2037  NE2 GLN   273     107.156 133.976 102.041  0.00  0.00           N  
ATOM   2038  OE1 GLN   273     108.885 135.167 102.465  0.00  0.00           O  
ATOM   2039  N   ASN   274     112.941 135.026 100.641  0.00  0.00           N  
ATOM   2040  CA  ASN   274     114.416 134.987 100.611  0.00  0.00           C  
ATOM   2041  C   ASN   274     115.027 134.986  99.263  0.00  0.00           C  
ATOM   2042  O   ASN   274     116.225 135.229  99.113  0.00  0.00           O  
ATOM   2043  CB  ASN   274     114.975 133.753 101.355  0.00  0.00           C  
ATOM   2044  CG  ASN   274     114.743 133.898 102.892  0.00  0.00           C  
ATOM   2045  ND2 ASN   274     115.715 133.595 103.757  0.00  0.00           N  
ATOM   2046  OD1 ASN   274     113.593 134.112 103.280  0.00  0.00           O  
ATOM   2047  N   GLY   275     114.265 134.537  98.278  0.00  0.00           N  
ATOM   2048  CA  GLY   275     114.726 134.552  96.920  0.00  0.00           C  
ATOM   2049  C   GLY   275     114.054 135.747  96.216  0.00  0.00           C  
ATOM   2050  O   GLY   275     113.204 136.454  96.774  0.00  0.00           O  
ATOM   2051  N   SER   276     114.444 136.046  94.953  0.00  0.00           N  
ATOM   2052  CA  SER   276     114.287 137.417  94.380  0.00  0.00           C  
ATOM   2053  C   SER   276     112.741 137.801  94.437  0.00  0.00           C  
ATOM   2054  O   SER   276     112.500 138.869  95.021  0.00  0.00           O  
ATOM   2055  CB  SER   276     114.843 137.511  92.975  0.00  0.00           C  
ATOM   2056  OG  SER   276     116.256 137.276  93.001  0.00  0.00           O  
ATOM   2057  N   VAL   277     111.882 136.891  94.032  0.00  0.00           N  
ATOM   2058  CA  VAL   277     110.417 136.951  94.303  0.00  0.00           C  
ATOM   2059  C   VAL   277     109.860 135.498  94.223  0.00  0.00           C  
ATOM   2060  O   VAL   277     110.303 134.715  93.393  0.00  0.00           O  
ATOM   2061  CB  VAL   277     109.685 137.949  93.428  0.00  0.00           C  
ATOM   2062  CG1 VAL   277     109.452 137.520  92.026  0.00  0.00           C  
ATOM   2063  CG2 VAL   277     108.443 138.517  94.141  0.00  0.00           C  
ATOM   2064  N   LYS   278     108.812 135.238  94.941  0.00  0.00           N  
ATOM   2065  CA  LYS   278     108.150 133.952  94.851  0.00  0.00           C  
ATOM   2066  C   LYS   278     106.825 134.124  94.205  0.00  0.00           C  
ATOM   2067  O   LYS   278     106.068 134.965  94.638  0.00  0.00           O  
ATOM   2068  CB  LYS   278     108.054 133.360  96.243  0.00  0.00           C  
ATOM   2069  CG  LYS   278     107.073 132.098  96.266  0.00  0.00           C  
ATOM   2070  CD  LYS   278     107.057 131.460  97.701  0.00  0.00           C  
ATOM   2071  CE  LYS   278     106.152 130.206  97.592  0.00  0.00           C  
ATOM   2072  NZ  LYS   278     106.128 129.404  98.787  0.00  0.00           N1+
ATOM   2073  N   TRP   279     106.517 133.312  93.159  0.00  0.00           N  
ATOM   2074  CA  TRP   279     105.192 133.032  92.618  0.00  0.00           C  
ATOM   2075  C   TRP   279     104.256 132.051  93.378  0.00  0.00           C  
ATOM   2076  O   TRP   279     104.752 131.128  94.044  0.00  0.00           O  
ATOM   2077  CB  TRP   279     105.208 132.725  91.095  0.00  0.00           C  
ATOM   2078  CG  TRP   279     105.373 133.848  90.142  0.00  0.00           C  
ATOM   2079  CD1 TRP   279     106.579 134.337  89.885  0.00  0.00           C  
ATOM   2080  CD2 TRP   279     104.403 134.853  89.681  0.00  0.00           C  
ATOM   2081  CE2 TRP   279     105.111 135.859  88.897  0.00  0.00           C  
ATOM   2082  CE3 TRP   279     102.994 134.886  89.689  0.00  0.00           C  
ATOM   2083  NE1 TRP   279     106.430 135.461  89.059  0.00  0.00           N  
ATOM   2084  CZ2 TRP   279     104.426 136.896  88.282  0.00  0.00           C  
ATOM   2085  CZ3 TRP   279     102.281 135.935  89.062  0.00  0.00           C  
ATOM   2086  CH2 TRP   279     103.001 136.945  88.349  0.00  0.00           C  
ATOM   2087  N   PHE   280     102.906 132.269  93.317  0.00  0.00           N  
ATOM   2088  CA  PHE   280     101.881 131.446  93.795  0.00  0.00           C  
ATOM   2089  C   PHE   280     100.831 131.249  92.688  0.00  0.00           C  
ATOM   2090  O   PHE   280     100.761 132.048  91.742  0.00  0.00           O  
ATOM   2091  CB  PHE   280     101.300 132.159  95.018  0.00  0.00           C  
ATOM   2092  CG  PHE   280     102.286 132.582  96.095  0.00  0.00           C  
ATOM   2093  CD1 PHE   280     103.014 133.817  95.977  0.00  0.00           C  
ATOM   2094  CD2 PHE   280     102.356 131.807  97.262  0.00  0.00           C  
ATOM   2095  CE1 PHE   280     103.870 134.110  97.046  0.00  0.00           C  
ATOM   2096  CE2 PHE   280     103.259 132.224  98.280  0.00  0.00           C  
ATOM   2097  CZ  PHE   280     103.955 133.433  98.220  0.00  0.00           C  
ATOM   2098  N   CYS   281     100.127 130.129  92.791  0.00  0.00           N  
ATOM   2099  CA  CYS   281      98.971 129.687  91.908  0.00  0.00           C  
ATOM   2100  C   CYS   281      97.769 129.158  92.762  0.00  0.00           C  
ATOM   2101  O   CYS   281      97.899 128.158  93.441  0.00  0.00           O  
ATOM   2102  CB  CYS   281      99.446 128.720  90.847  0.00  0.00           C  
ATOM   2103  SG  CYS   281     100.697 129.456  89.727  0.00  0.00           S  
ATOM   2104  N   GLY   282      96.626 129.787  92.730  0.00  0.00           N  
ATOM   2105  CA  GLY   282      95.466 129.436  93.568  0.00  0.00           C  
ATOM   2106  C   GLY   282      94.239 130.128  93.087  0.00  0.00           C  
ATOM   2107  O   GLY   282      93.977 130.398  91.935  0.00  0.00           O  
ATOM   2108  N   GLN   283      93.388 130.421  94.105  0.00  0.00           N  
ATOM   2109  CA  GLN   283      92.038 130.968  94.002  0.00  0.00           C  
ATOM   2110  C   GLN   283      91.946 132.404  93.503  0.00  0.00           C  
ATOM   2111  O   GLN   283      93.030 133.076  93.530  0.00  0.00           O  
ATOM   2112  CB  GLN   283      91.281 130.716  95.324  0.00  0.00           C  
ATOM   2113  CG  GLN   283      91.818 131.476  96.498  0.00  0.00           C  
ATOM   2114  CD  GLN   283      91.075 131.370  97.841  0.00  0.00           C  
ATOM   2115  NE2 GLN   283      91.287 132.354  98.709  0.00  0.00           N  
ATOM   2116  OE1 GLN   283      90.284 130.511  98.134  0.00  0.00           O  
ATOM   2117  N   PRO   284      90.813 132.898  92.997  0.00  0.00           N  
ATOM   2118  CA  PRO   284      90.659 134.339  92.590  0.00  0.00           C  
ATOM   2119  C   PRO   284      91.037 135.373  93.609  0.00  0.00           C  
ATOM   2120  O   PRO   284      90.578 135.473  94.789  0.00  0.00           O  
ATOM   2121  CB  PRO   284      89.197 134.384  92.099  0.00  0.00           C  
ATOM   2122  CG  PRO   284      88.863 132.973  91.608  0.00  0.00           C  
ATOM   2123  CD  PRO   284      89.515 132.198  92.742  0.00  0.00           C  
ATOM   2124  N   VAL   285      92.104 136.127  93.275  0.00  0.00           N  
ATOM   2125  CA  VAL   285      92.668 137.209  94.133  0.00  0.00           C  
ATOM   2126  C   VAL   285      92.732 138.562  93.427  0.00  0.00           C  
ATOM   2127  O   VAL   285      92.659 138.659  92.194  0.00  0.00           O  
ATOM   2128  CB  VAL   285      94.014 136.867  94.905  0.00  0.00           C  
ATOM   2129  CG1 VAL   285      93.965 135.515  95.622  0.00  0.00           C  
ATOM   2130  CG2 VAL   285      95.190 136.862  93.910  0.00  0.00           C  
ATOM   2131  N   THR   286      92.955 139.590  94.200  0.00  0.00           N  
ATOM   2132  CA  THR   286      93.285 140.933  93.732  0.00  0.00           C  
ATOM   2133  C   THR   286      94.257 141.744  94.720  0.00  0.00           C  
ATOM   2134  O   THR   286      94.299 141.465  95.921  0.00  0.00           O  
ATOM   2135  CB  THR   286      91.996 141.754  93.385  0.00  0.00           C  
ATOM   2136  CG2 THR   286      91.215 142.273  94.600  0.00  0.00           C  
ATOM   2137  OG1 THR   286      92.322 142.886  92.638  0.00  0.00           O  
ATOM   2138  N   ARG   287      94.921 142.805  94.092  0.00  0.00           N  
ATOM   2139  CA  ARG   287      95.708 143.839  94.797  0.00  0.00           C  
ATOM   2140  C   ARG   287      95.280 145.289  94.440  0.00  0.00           C  
ATOM   2141  O   ARG   287      95.105 145.534  93.218  0.00  0.00           O  
ATOM   2142  CB  ARG   287      97.136 143.528  94.509  0.00  0.00           C  
ATOM   2143  CG  ARG   287      98.204 144.387  95.285  0.00  0.00           C  
ATOM   2144  CD  ARG   287      99.631 144.125  94.787  0.00  0.00           C  
ATOM   2145  NE  ARG   287     100.207 142.911  95.425  0.00  0.00           N  
ATOM   2146  CZ  ARG   287     101.121 142.115  94.883  0.00  0.00           C  
ATOM   2147  NH1 ARG   287     101.442 142.215  93.619  0.00  0.00           N1+
ATOM   2148  NH2 ARG   287     101.754 141.272  95.589  0.00  0.00           N  
ATOM   2149  N   THR   288      95.129 146.246  95.391  0.00  0.00           N  
ATOM   2150  CA  THR   288      94.765 147.691  95.086  0.00  0.00           C  
ATOM   2151  C   THR   288      95.723 148.561  94.358  0.00  0.00           C  
ATOM   2152  O   THR   288      95.415 149.365  93.500  0.00  0.00           O  
ATOM   2153  CB  THR   288      94.242 148.317  96.396  0.00  0.00           C  
ATOM   2154  CG2 THR   288      93.177 149.290  96.072  0.00  0.00           C  
ATOM   2155  OG1 THR   288      93.619 147.404  97.248  0.00  0.00           O  
ATOM   2156  N   THR   289      97.087 148.323  94.500  0.00  0.00           N  
ATOM   2157  CA  THR   289      98.161 149.152  93.958  0.00  0.00           C  
ATOM   2158  C   THR   289      99.448 148.356  93.553  0.00  0.00           C  
ATOM   2159  O   THR   289      99.763 147.274  94.016  0.00  0.00           O  
ATOM   2160  CB  THR   289      98.299 150.483  94.695  0.00  0.00           C  
ATOM   2161  CG2 THR   289      99.101 150.180  95.965  0.00  0.00           C  
ATOM   2162  OG1 THR   289      98.979 151.494  94.003  0.00  0.00           O  
ATOM   2163  N   ALA   290     100.158 149.102  92.679  0.00  0.00           N  
ATOM   2164  CA  ALA   290     101.452 148.737  92.091  0.00  0.00           C  
ATOM   2165  C   ALA   290     102.608 148.522  93.075  0.00  0.00           C  
ATOM   2166  O   ALA   290     103.527 147.740  92.906  0.00  0.00           O  
ATOM   2167  CB  ALA   290     101.853 149.688  91.004  0.00  0.00           C  
ATOM   2168  N   THR   291     102.562 149.267  94.162  0.00  0.00           N  
ATOM   2169  CA  THR   291     103.495 149.345  95.329  0.00  0.00           C  
ATOM   2170  C   THR   291     103.329 148.269  96.454  0.00  0.00           C  
ATOM   2171  O   THR   291     104.310 148.193  97.178  0.00  0.00           O  
ATOM   2172  CB  THR   291     103.725 150.766  95.915  0.00  0.00           C  
ATOM   2173  CG2 THR   291     103.551 151.966  95.010  0.00  0.00           C  
ATOM   2174  OG1 THR   291     102.775 150.947  96.876  0.00  0.00           O  
ATOM   2175  N   ALA   292     102.196 147.588  96.506  0.00  0.00           N  
ATOM   2176  CA  ALA   292     101.971 146.594  97.580  0.00  0.00           C  
ATOM   2177  C   ALA   292     102.506 145.196  97.349  0.00  0.00           C  
ATOM   2178  O   ALA   292     102.685 144.841  96.224  0.00  0.00           O  
ATOM   2179  CB  ALA   292     100.470 146.596  97.761  0.00  0.00           C  
ATOM   2180  N   THR   293     102.774 144.372  98.398  0.00  0.00           N  
ATOM   2181  CA  THR   293     103.188 142.992  98.421  0.00  0.00           C  
ATOM   2182  C   THR   293     102.116 141.948  98.847  0.00  0.00           C  
ATOM   2183  O   THR   293     102.010 140.847  98.341  0.00  0.00           O  
ATOM   2184  CB  THR   293     104.546 142.760  99.075  0.00  0.00           C  
ATOM   2185  CG2 THR   293     105.465 143.978  99.291  0.00  0.00           C  
ATOM   2186  OG1 THR   293     104.378 142.274 100.362  0.00  0.00           O  
ATOM   2187  N   ASP   294     101.321 142.351  99.810  0.00  0.00           N  
ATOM   2188  CA  ASP   294     100.087 141.632 100.135  0.00  0.00           C  
ATOM   2189  C   ASP   294      99.032 141.506  98.968  0.00  0.00           C  
ATOM   2190  O   ASP   294      99.119 142.311  98.022  0.00  0.00           O  
ATOM   2191  CB  ASP   294      99.488 142.140 101.443  0.00  0.00           C  
ATOM   2192  CG  ASP   294     100.197 141.610 102.639  0.00  0.00           C  
ATOM   2193  OD1 ASP   294     100.790 140.493 102.671  0.00  0.00           O  
ATOM   2194  OD2 ASP   294     100.200 142.283 103.683  0.00  0.00           O1-
ATOM   2195  N   VAL   295      98.023 140.622  99.133  0.00  0.00           N  
ATOM   2196  CA  VAL   295      96.953 140.304  98.171  0.00  0.00           C  
ATOM   2197  C   VAL   295      95.654 139.913  98.904  0.00  0.00           C  
ATOM   2198  O   VAL   295      95.690 139.199  99.934  0.00  0.00           O  
ATOM   2199  CB  VAL   295      97.300 139.162  97.250  0.00  0.00           C  
ATOM   2200  CG1 VAL   295      96.695 139.370  95.896  0.00  0.00           C  
ATOM   2201  CG2 VAL   295      98.856 138.972  97.066  0.00  0.00           C  
ATOM   2202  N   ALA   296      94.475 140.227  98.373  0.00  0.00           N  
ATOM   2203  CA  ALA   296      93.181 140.150  98.959  0.00  0.00           C  
ATOM   2204  C   ALA   296      92.327 139.020  98.287  0.00  0.00           C  
ATOM   2205  O   ALA   296      92.277 138.936  97.072  0.00  0.00           O  
ATOM   2206  CB  ALA   296      92.484 141.497  98.862  0.00  0.00           C  
ATOM   2207  N   ALA   297      91.635 138.158  99.003  0.00  0.00           N  
ATOM   2208  CA  ALA   297      91.095 136.920  98.558  0.00  0.00           C  
ATOM   2209  C   ALA   297      89.615 137.047  97.943  0.00  0.00           C  
ATOM   2210  O   ALA   297      88.590 136.545  98.558  0.00  0.00           O  
ATOM   2211  CB  ALA   297      91.070 135.938  99.682  0.00  0.00           C  
ATOM   2212  N   ALA   298      89.535 137.690  96.777  0.00  0.00           N  
ATOM   2213  CA  ALA   298      88.372 138.015  95.919  0.00  0.00           C  
ATOM   2214  C   ALA   298      87.572 136.867  95.371  0.00  0.00           C  
ATOM   2215  O   ALA   298      87.413 136.616  94.203  0.00  0.00           O  
ATOM   2216  CB  ALA   298      88.876 138.975  94.819  0.00  0.00           C  
ATOM   2217  N   ASN   299      86.977 135.998  96.173  0.00  0.00           N  
ATOM   2218  CA  ASN   299      86.489 134.661  95.846  0.00  0.00           C  
ATOM   2219  C   ASN   299      85.119 134.604  95.123  0.00  0.00           C  
ATOM   2220  O   ASN   299      84.560 133.523  94.941  0.00  0.00           O  
ATOM   2221  CB  ASN   299      86.492 133.784  97.106  0.00  0.00           C  
ATOM   2222  CG  ASN   299      87.771 133.104  97.405  0.00  0.00           C  
ATOM   2223  ND2 ASN   299      88.526 133.589  98.346  0.00  0.00           N  
ATOM   2224  OD1 ASN   299      88.251 132.214  96.692  0.00  0.00           O  
ATOM   2225  N   GLY   300      84.704 135.762  94.539  0.00  0.00           N  
ATOM   2226  CA  GLY   300      83.712 135.912  93.538  0.00  0.00           C  
ATOM   2227  C   GLY   300      82.319 135.343  93.771  0.00  0.00           C  
ATOM   2228  O   GLY   300      81.734 134.792  92.835  0.00  0.00           O  
ATOM   2229  N   LYS   301      81.774 135.307  95.029  0.00  0.00           N  
ATOM   2230  CA  LYS   301      80.569 134.592  95.492  0.00  0.00           C  
ATOM   2231  C   LYS   301      80.573 133.085  95.250  0.00  0.00           C  
ATOM   2232  O   LYS   301      79.558 132.448  95.420  0.00  0.00           O  
ATOM   2233  CB  LYS   301      79.225 135.282  95.270  0.00  0.00           C  
ATOM   2234  CG  LYS   301      79.169 136.587  96.025  0.00  0.00           C  
ATOM   2235  CD  LYS   301      77.691 137.003  95.893  0.00  0.00           C  
ATOM   2236  CE  LYS   301      77.363 138.253  96.714  0.00  0.00           C  
ATOM   2237  NZ  LYS   301      75.918 138.557  96.784  0.00  0.00           N1+
ATOM   2238  N   THR   302      81.734 132.440  94.884  0.00  0.00           N  
ATOM   2239  CA  THR   302      81.906 131.015  94.486  0.00  0.00           C  
ATOM   2240  C   THR   302      81.449 130.574  93.145  0.00  0.00           C  
ATOM   2241  O   THR   302      82.019 129.617  92.600  0.00  0.00           O  
ATOM   2242  CB  THR   302      81.598 130.091  95.696  0.00  0.00           C  
ATOM   2243  CG2 THR   302      81.896 130.580  97.093  0.00  0.00           C  
ATOM   2244  OG1 THR   302      80.180 129.812  95.825  0.00  0.00           O  
ATOM   2245  N   ASP   303      80.477 131.220  92.547  0.00  0.00           N  
ATOM   2246  CA  ASP   303      79.931 130.949  91.185  0.00  0.00           C  
ATOM   2247  C   ASP   303      80.973 131.151  90.064  0.00  0.00           C  
ATOM   2248  O   ASP   303      80.990 130.504  89.036  0.00  0.00           O  
ATOM   2249  CB  ASP   303      78.689 131.826  90.858  0.00  0.00           C  
ATOM   2250  CG  ASP   303      77.506 131.513  91.771  0.00  0.00           C  
ATOM   2251  OD1 ASP   303      77.543 130.850  92.825  0.00  0.00           O  
ATOM   2252  OD2 ASP   303      76.374 132.014  91.453  0.00  0.00           O1-
ATOM   2253  N   ASP   304      81.993 131.993  90.381  0.00  0.00           N  
ATOM   2254  CA  ASP   304      83.151 132.218  89.472  0.00  0.00           C  
ATOM   2255  C   ASP   304      84.287 131.164  89.608  0.00  0.00           C  
ATOM   2256  O   ASP   304      85.074 131.152  88.660  0.00  0.00           O  
ATOM   2257  CB  ASP   304      83.842 133.561  89.686  0.00  0.00           C  
ATOM   2258  CG  ASP   304      83.107 134.705  89.007  0.00  0.00           C  
ATOM   2259  OD1 ASP   304      82.000 134.578  88.452  0.00  0.00           O  
ATOM   2260  OD2 ASP   304      83.601 135.861  89.040  0.00  0.00           O1-
ATOM   2261  N   LYS   305      84.391 130.391  90.709  0.00  0.00           N  
ATOM   2262  CA  LYS   305      85.517 129.601  91.154  0.00  0.00           C  
ATOM   2263  C   LYS   305      85.503 128.162  90.790  0.00  0.00           C  
ATOM   2264  O   LYS   305      84.523 127.419  90.964  0.00  0.00           O  
ATOM   2265  CB  LYS   305      85.412 129.649  92.706  0.00  0.00           C  
ATOM   2266  CG  LYS   305      86.630 129.082  93.507  0.00  0.00           C  
ATOM   2267  CD  LYS   305      86.689 129.509  94.947  0.00  0.00           C  
ATOM   2268  CE  LYS   305      87.861 128.763  95.539  0.00  0.00           C  
ATOM   2269  NZ  LYS   305      88.089 129.332  96.895  0.00  0.00           N1+
ATOM   2270  N   ILE   306      86.671 127.625  90.314  0.00  0.00           N  
ATOM   2271  CA  ILE   306      86.915 126.207  90.098  0.00  0.00           C  
ATOM   2272  C   ILE   306      86.547 125.383  91.337  0.00  0.00           C  
ATOM   2273  O   ILE   306      86.893 125.694  92.416  0.00  0.00           O  
ATOM   2274  CB  ILE   306      88.385 126.094  89.600  0.00  0.00           C  
ATOM   2275  CG1 ILE   306      88.712 126.793  88.244  0.00  0.00           C  
ATOM   2276  CG2 ILE   306      88.826 124.619  89.561  0.00  0.00           C  
ATOM   2277  CD1 ILE   306      88.153 126.096  87.014  0.00  0.00           C  
ATOM   2278  N   ASN   307      85.855 124.270  91.084  0.00  0.00           N  
ATOM   2279  CA  ASN   307      85.575 123.339  92.145  0.00  0.00           C  
ATOM   2280  C   ASN   307      86.842 122.629  92.710  0.00  0.00           C  
ATOM   2281  O   ASN   307      87.683 122.168  91.946  0.00  0.00           O  
ATOM   2282  CB  ASN   307      84.652 122.288  91.509  0.00  0.00           C  
ATOM   2283  CG  ASN   307      84.171 121.268  92.442  0.00  0.00           C  
ATOM   2284  ND2 ASN   307      82.957 120.816  92.146  0.00  0.00           N  
ATOM   2285  OD1 ASN   307      84.856 120.688  93.294  0.00  0.00           O  
ATOM   2286  N   THR   308      87.033 122.622  93.978  0.00  0.00           N  
ATOM   2287  CA  THR   308      88.298 122.372  94.703  0.00  0.00           C  
ATOM   2288  C   THR   308      88.850 120.937  94.506  0.00  0.00           C  
ATOM   2289  O   THR   308      89.990 120.693  94.503  0.00  0.00           O  
ATOM   2290  CB  THR   308      88.265 122.708  96.206  0.00  0.00           C  
ATOM   2291  CG2 THR   308      89.641 122.899  96.849  0.00  0.00           C  
ATOM   2292  OG1 THR   308      87.457 123.871  96.306  0.00  0.00           O  
ATOM   2293  N   LYS   309      87.894 120.034  94.164  0.00  0.00           N  
ATOM   2294  CA  LYS   309      88.249 118.714  93.695  0.00  0.00           C  
ATOM   2295  C   LYS   309      89.046 118.560  92.398  0.00  0.00           C  
ATOM   2296  O   LYS   309      89.802 117.609  92.189  0.00  0.00           O  
ATOM   2297  CB  LYS   309      86.921 117.966  93.565  0.00  0.00           C  
ATOM   2298  CG  LYS   309      86.036 117.998  94.737  0.00  0.00           C  
ATOM   2299  CD  LYS   309      84.588 117.474  94.603  0.00  0.00           C  
ATOM   2300  CE  LYS   309      83.650 117.898  95.722  0.00  0.00           C  
ATOM   2301  NZ  LYS   309      82.305 117.304  95.543  0.00  0.00           N1+
ATOM   2302  N   HIE   310      89.046 119.596  91.560  0.00  0.00           N  
ATOM   2303  CA  HIE   310      89.446 119.407  90.206  0.00  0.00           C  
ATOM   2304  C   HIE   310      90.790 120.175  89.850  0.00  0.00           C  
ATOM   2305  O   HIE   310      91.123 120.517  88.712  0.00  0.00           O  
ATOM   2306  CB  HIE   310      88.183 119.831  89.383  0.00  0.00           C  
ATOM   2307  CG  HIE   310      87.219 118.688  89.213  0.00  0.00           C  
ATOM   2308  CD2 HIE   310      87.195 117.434  89.775  0.00  0.00           C  
ATOM   2309  ND1 HIE   310      86.079 118.774  88.376  0.00  0.00           N  
ATOM   2310  CE1 HIE   310      85.457 117.631  88.411  0.00  0.00           C  
ATOM   2311  NE2 HIE   310      86.126 116.773  89.266  0.00  0.00           N  
ATOM   2312  N   LEU   311      91.463 120.579  90.940  0.00  0.00           N  
ATOM   2313  CA  LEU   311      92.660 121.399  90.791  0.00  0.00           C  
ATOM   2314  C   LEU   311      93.977 120.666  90.599  0.00  0.00           C  
ATOM   2315  O   LEU   311      94.154 119.546  91.096  0.00  0.00           O  
ATOM   2316  CB  LEU   311      92.765 122.341  92.060  0.00  0.00           C  
ATOM   2317  CG  LEU   311      91.594 123.350  92.248  0.00  0.00           C  
ATOM   2318  CD1 LEU   311      91.473 123.955  93.726  0.00  0.00           C  
ATOM   2319  CD2 LEU   311      91.833 124.534  91.254  0.00  0.00           C  
ATOM   2320  N   PRO   312      94.939 121.217  89.794  0.00  0.00           N  
ATOM   2321  CA  PRO   312      96.207 120.625  89.801  0.00  0.00           C  
ATOM   2322  C   PRO   312      96.750 120.730  91.300  0.00  0.00           C  
ATOM   2323  O   PRO   312      96.433 121.653  92.071  0.00  0.00           O  
ATOM   2324  CB  PRO   312      97.065 121.389  88.769  0.00  0.00           C  
ATOM   2325  CG  PRO   312      95.992 121.959  87.817  0.00  0.00           C  
ATOM   2326  CD  PRO   312      94.747 122.095  88.651  0.00  0.00           C  
ATOM   2327  N   SER   313      97.595 119.725  91.689  0.00  0.00           N  
ATOM   2328  CA  SER   313      97.963 119.513  93.048  0.00  0.00           C  
ATOM   2329  C   SER   313      98.885 120.544  93.626  0.00  0.00           C  
ATOM   2330  O   SER   313      98.982 120.660  94.856  0.00  0.00           O  
ATOM   2331  CB  SER   313      98.619 118.132  93.439  0.00  0.00           C  
ATOM   2332  OG  SER   313      99.798 118.024  92.702  0.00  0.00           O  
ATOM   2333  N   THR   314      99.529 121.325  92.732  0.00  0.00           N  
ATOM   2334  CA  THR   314     100.447 122.524  92.992  0.00  0.00           C  
ATOM   2335  C   THR   314      99.613 123.841  93.042  0.00  0.00           C  
ATOM   2336  O   THR   314      99.948 124.760  93.815  0.00  0.00           O  
ATOM   2337  CB  THR   314     101.397 122.867  91.888  0.00  0.00           C  
ATOM   2338  CG2 THR   314     102.684 121.966  91.932  0.00  0.00           C  
ATOM   2339  OG1 THR   314     100.669 122.621  90.715  0.00  0.00           O  
ATOM   2340  N   CYS   315      98.436 123.870  92.439  0.00  0.00           N  
ATOM   2341  CA  CYS   315      97.646 125.042  92.103  0.00  0.00           C  
ATOM   2342  C   CYS   315      96.461 125.317  93.091  0.00  0.00           C  
ATOM   2343  O   CYS   315      95.305 125.344  92.650  0.00  0.00           O  
ATOM   2344  CB  CYS   315      97.172 125.041  90.640  0.00  0.00           C  
ATOM   2345  SG  CYS   315      98.664 125.488  89.656  0.00  0.00           S  
ATOM   2346  N   ARG   316      96.742 125.457  94.389  0.00  0.00           N  
ATOM   2347  CA  ARG   316      95.755 125.440  95.496  0.00  0.00           C  
ATOM   2348  C   ARG   316      96.086 126.533  96.478  0.00  0.00           C  
ATOM   2349  O   ARG   316      95.745 126.368  97.692  0.00  0.00           O  
ATOM   2350  CB  ARG   316      95.756 123.967  96.068  0.00  0.00           C  
ATOM   2351  CG  ARG   316      95.327 122.939  95.096  0.00  0.00           C  
ATOM   2352  CD  ARG   316      95.012 121.596  95.683  0.00  0.00           C  
ATOM   2353  NE  ARG   316      96.180 120.998  96.316  0.00  0.00           N  
ATOM   2354  CZ  ARG   316      96.390 119.664  96.460  0.00  0.00           C  
ATOM   2355  NH1 ARG   316      95.456 118.819  96.190  0.00  0.00           N1+
ATOM   2356  NH2 ARG   316      97.572 119.152  96.766  0.00  0.00           N  
ATOM   2357  N   ASP   317      96.701 127.531  96.017  0.00  0.00           N  
ATOM   2358  CA  ASP   317      97.196 128.540  96.955  0.00  0.00           C  
ATOM   2359  C   ASP   317      96.085 129.452  97.517  0.00  0.00           C  
ATOM   2360  O   ASP   317      95.006 129.424  96.949  0.00  0.00           O  
ATOM   2361  CB  ASP   317      98.373 129.357  96.310  0.00  0.00           C  
ATOM   2362  CG  ASP   317      99.699 128.545  96.253  0.00  0.00           C  
ATOM   2363  OD1 ASP   317     100.037 127.689  97.150  0.00  0.00           O  
ATOM   2364  OD2 ASP   317     100.435 128.689  95.282  0.00  0.00           O1-
ATOM   2365  N   ASP   318      96.217 130.152  98.613  0.00  0.00           N  
ATOM   2366  CA  ASP   318      95.207 131.001  99.239  0.00  0.00           C  
ATOM   2367  C   ASP   318      95.771 132.251  99.941  0.00  0.00           C  
ATOM   2368  O   ASP   318      96.862 132.660  99.537  0.00  0.00           O  
ATOM   2369  CB  ASP   318      94.374 130.162 100.261  0.00  0.00           C  
ATOM   2370  CG  ASP   318      95.191 129.529 101.396  0.00  0.00           C  
ATOM   2371  OD1 ASP   318      96.392 129.780 101.489  0.00  0.00           O  
ATOM   2372  OD2 ASP   318      94.574 128.797 102.162  0.00  0.00           O1-
ATOM   2373  N   SER   319      95.217 132.828 100.957  0.00  0.00           N  
ATOM   2374  CA  SER   319      95.814 133.931 101.747  0.00  0.00           C  
ATOM   2375  C   SER   319      96.817 133.405 102.836  0.00  0.00           C  
ATOM   2376  O   SER   319      97.747 134.105 103.176  0.00  0.00           O  
ATOM   2377  CB  SER   319      94.733 134.856 102.281  0.00  0.00           C  
ATOM   2378  OG  SER   319      93.972 134.287 103.346  0.00  0.00           O  
ATOM   2379  N   SER   320      96.645 132.155 103.275  0.00  0.00           N  
ATOM   2380  CA  SER   320      97.539 131.516 104.196  0.00  0.00           C  
ATOM   2381  C   SER   320      98.881 131.054 103.536  0.00  0.00           C  
ATOM   2382  O   SER   320      99.867 130.752 104.221  0.00  0.00           O  
ATOM   2383  CB  SER   320      96.800 130.344 104.946  0.00  0.00           C  
ATOM   2384  OG  SER   320      97.528 129.912 106.032  0.00  0.00           O  
ATOM   2385  N   ALA   321      98.967 130.970 102.220  0.00  0.00           N  
ATOM   2386  CA  ALA   321     100.151 130.519 101.478  0.00  0.00           C  
ATOM   2387  C   ALA   321     101.424 131.405 101.846  0.00  0.00           C  
ATOM   2388  O   ALA   321     101.273 132.638 101.808  0.00  0.00           O  
ATOM   2389  CB  ALA   321      99.863 130.604  99.944  0.00  0.00           C  
ATOM   2390  N   SER   322     102.576 130.858 102.082  0.00  0.00           N  
ATOM   2391  CA  SER   322     103.868 131.489 102.284  0.00  0.00           C  
ATOM   2392  C   SER   322     105.037 130.766 101.640  0.00  0.00           C  
ATOM   2393  O   SER   322     105.178 129.557 102.025  0.00  0.00           O  
ATOM   2394  CB  SER   322     104.051 131.744 103.780  0.00  0.00           C  
ATOM   2395  OG  SER   322     105.337 132.281 104.091  0.00  0.00           O  
ATOM   2396  OXT SER   322     105.755 131.307 100.739  0.00  0.00           O1-
ATOM   2397  N   PHE   323      59.357  66.199  79.750  0.00  0.00           N  
ATOM   2398  CA  PHE   323      60.216  67.117  78.982  0.00  0.00           C  
ATOM   2399  C   PHE   323      61.509  67.627  79.633  0.00  0.00           C  
ATOM   2400  O   PHE   323      62.047  68.634  79.348  0.00  0.00           O  
ATOM   2401  CB  PHE   323      59.362  68.233  78.344  0.00  0.00           C  
ATOM   2402  CG  PHE   323      58.623  67.933  77.119  0.00  0.00           C  
ATOM   2403  CD1 PHE   323      57.272  68.357  77.036  0.00  0.00           C  
ATOM   2404  CD2 PHE   323      59.243  67.379  75.988  0.00  0.00           C  
ATOM   2405  CE1 PHE   323      56.540  68.205  75.879  0.00  0.00           C  
ATOM   2406  CE2 PHE   323      58.534  67.224  74.807  0.00  0.00           C  
ATOM   2407  CZ  PHE   323      57.201  67.539  74.766  0.00  0.00           C  
ATOM   2408  N   THR   324      61.965  66.944  80.738  0.00  0.00           N  
ATOM   2409  CA  THR   324      62.969  67.393  81.658  0.00  0.00           C  
ATOM   2410  C   THR   324      64.267  67.930  81.029  0.00  0.00           C  
ATOM   2411  O   THR   324      64.848  68.922  81.440  0.00  0.00           O  
ATOM   2412  CB  THR   324      63.117  66.447  82.796  0.00  0.00           C  
ATOM   2413  CG2 THR   324      61.926  65.606  83.329  0.00  0.00           C  
ATOM   2414  OG1 THR   324      64.132  65.533  82.396  0.00  0.00           O  
ATOM   2415  N   LEU   325      64.714  67.211  79.942  0.00  0.00           N  
ATOM   2416  CA  LEU   325      66.007  67.501  79.279  0.00  0.00           C  
ATOM   2417  C   LEU   325      66.049  68.842  78.617  0.00  0.00           C  
ATOM   2418  O   LEU   325      67.104  69.322  78.144  0.00  0.00           O  
ATOM   2419  CB  LEU   325      66.375  66.499  78.171  0.00  0.00           C  
ATOM   2420  CG  LEU   325      66.692  65.094  78.656  0.00  0.00           C  
ATOM   2421  CD1 LEU   325      66.756  64.116  77.458  0.00  0.00           C  
ATOM   2422  CD2 LEU   325      67.969  65.055  79.354  0.00  0.00           C  
ATOM   2423  N   ILE   326      64.923  69.506  78.433  0.00  0.00           N  
ATOM   2424  CA  ILE   326      64.917  70.873  77.829  0.00  0.00           C  
ATOM   2425  C   ILE   326      65.796  71.915  78.501  0.00  0.00           C  
ATOM   2426  O   ILE   326      66.501  72.608  77.733  0.00  0.00           O  
ATOM   2427  CB  ILE   326      63.447  71.326  77.701  0.00  0.00           C  
ATOM   2428  CG1 ILE   326      62.759  70.617  76.504  0.00  0.00           C  
ATOM   2429  CG2 ILE   326      63.316  72.847  77.405  0.00  0.00           C  
ATOM   2430  CD1 ILE   326      61.348  70.896  76.326  0.00  0.00           C  
ATOM   2431  N   GLU   327      65.770  71.992  79.835  0.00  0.00           N  
ATOM   2432  CA  GLU   327      66.725  72.823  80.547  0.00  0.00           C  
ATOM   2433  C   GLU   327      68.196  72.664  80.133  0.00  0.00           C  
ATOM   2434  O   GLU   327      68.931  73.677  79.914  0.00  0.00           O  
ATOM   2435  CB  GLU   327      66.472  72.623  82.072  0.00  0.00           C  
ATOM   2436  CG  GLU   327      67.420  73.467  82.846  0.00  0.00           C  
ATOM   2437  CD  GLU   327      66.998  73.943  84.246  0.00  0.00           C  
ATOM   2438  OE1 GLU   327      65.771  73.941  84.532  0.00  0.00           O  
ATOM   2439  OE2 GLU   327      67.876  74.626  84.851  0.00  0.00           O1-
ATOM   2440  N   LEU   328      68.674  71.376  79.877  0.00  0.00           N  
ATOM   2441  CA  LEU   328      70.076  71.203  79.450  0.00  0.00           C  
ATOM   2442  C   LEU   328      70.347  71.646  78.018  0.00  0.00           C  
ATOM   2443  O   LEU   328      71.371  72.251  77.785  0.00  0.00           O  
ATOM   2444  CB  LEU   328      70.392  69.747  79.821  0.00  0.00           C  
ATOM   2445  CG  LEU   328      70.076  69.156  81.226  0.00  0.00           C  
ATOM   2446  CD1 LEU   328      70.120  67.609  81.342  0.00  0.00           C  
ATOM   2447  CD2 LEU   328      70.974  69.698  82.379  0.00  0.00           C  
ATOM   2448  N   MET   329      69.342  71.447  77.169  0.00  0.00           N  
ATOM   2449  CA  MET   329      69.428  71.951  75.760  0.00  0.00           C  
ATOM   2450  C   MET   329      69.341  73.442  75.741  0.00  0.00           C  
ATOM   2451  O   MET   329      70.082  74.023  74.945  0.00  0.00           O  
ATOM   2452  CB  MET   329      68.318  71.277  74.955  0.00  0.00           C  
ATOM   2453  CG  MET   329      68.503  69.821  74.597  0.00  0.00           C  
ATOM   2454  SD  MET   329      67.255  69.221  73.509  0.00  0.00           S  
ATOM   2455  CE  MET   329      65.775  69.168  74.556  0.00  0.00           C  
ATOM   2456  N   ILE   330      68.551  74.089  76.587  0.00  0.00           N  
ATOM   2457  CA  ILE   330      68.681  75.526  76.658  0.00  0.00           C  
ATOM   2458  C   ILE   330      70.031  76.038  77.198  0.00  0.00           C  
ATOM   2459  O   ILE   330      70.516  77.011  76.621  0.00  0.00           O  
ATOM   2460  CB  ILE   330      67.549  76.033  77.523  0.00  0.00           C  
ATOM   2461  CG1 ILE   330      66.212  75.902  76.767  0.00  0.00           C  
ATOM   2462  CG2 ILE   330      67.736  77.496  77.973  0.00  0.00           C  
ATOM   2463  CD1 ILE   330      64.968  75.954  77.710  0.00  0.00           C  
ATOM   2464  N   VAL   331      70.630  75.489  78.247  0.00  0.00           N  
ATOM   2465  CA  VAL   331      72.032  75.880  78.687  0.00  0.00           C  
ATOM   2466  C   VAL   331      72.958  75.971  77.452  0.00  0.00           C  
ATOM   2467  O   VAL   331      73.501  77.058  77.264  0.00  0.00           O  
ATOM   2468  CB  VAL   331      72.647  74.944  79.766  0.00  0.00           C  
ATOM   2469  CG1 VAL   331      74.140  75.081  79.962  0.00  0.00           C  
ATOM   2470  CG2 VAL   331      71.965  75.082  81.127  0.00  0.00           C  
ATOM   2471  N   ILE   332      73.167  74.913  76.654  0.00  0.00           N  
ATOM   2472  CA  ILE   332      74.052  74.916  75.436  0.00  0.00           C  
ATOM   2473  C   ILE   332      73.528  75.773  74.281  0.00  0.00           C  
ATOM   2474  O   ILE   332      74.345  76.266  73.524  0.00  0.00           O  
ATOM   2475  CB  ILE   332      74.409  73.498  74.992  0.00  0.00           C  
ATOM   2476  CG1 ILE   332      73.088  72.854  74.451  0.00  0.00           C  
ATOM   2477  CG2 ILE   332      75.021  72.685  76.209  0.00  0.00           C  
ATOM   2478  CD1 ILE   332      73.256  71.396  74.044  0.00  0.00           C  
ATOM   2479  N   ALA   333      72.232  76.096  74.203  0.00  0.00           N  
ATOM   2480  CA  ALA   333      71.645  77.090  73.274  0.00  0.00           C  
ATOM   2481  C   ALA   333      71.972  78.551  73.710  0.00  0.00           C  
ATOM   2482  O   ALA   333      72.334  79.352  72.847  0.00  0.00           O  
ATOM   2483  CB  ALA   333      70.089  76.888  73.261  0.00  0.00           C  
ATOM   2484  N   ILE   334      72.030  78.857  75.000  0.00  0.00           N  
ATOM   2485  CA  ILE   334      72.514  80.144  75.533  0.00  0.00           C  
ATOM   2486  C   ILE   334      74.069  80.324  75.359  0.00  0.00           C  
ATOM   2487  O   ILE   334      74.492  81.316  74.758  0.00  0.00           O  
ATOM   2488  CB  ILE   334      71.946  80.397  76.929  0.00  0.00           C  
ATOM   2489  CG1 ILE   334      70.392  80.543  76.933  0.00  0.00           C  
ATOM   2490  CG2 ILE   334      72.752  81.415  77.712  0.00  0.00           C  
ATOM   2491  CD1 ILE   334      69.815  80.358  78.308  0.00  0.00           C  
ATOM   2492  N   VAL   335      74.921  79.364  75.629  0.00  0.00           N  
ATOM   2493  CA  VAL   335      76.357  79.498  75.325  0.00  0.00           C  
ATOM   2494  C   VAL   335      76.546  79.672  73.802  0.00  0.00           C  
ATOM   2495  O   VAL   335      77.266  80.586  73.312  0.00  0.00           O  
ATOM   2496  CB  VAL   335      77.213  78.436  75.885  0.00  0.00           C  
ATOM   2497  CG1 VAL   335      78.688  78.693  75.740  0.00  0.00           C  
ATOM   2498  CG2 VAL   335      76.864  78.267  77.411  0.00  0.00           C  
ATOM   2499  N   GLY   336      75.759  78.956  73.014  0.00  0.00           N  
ATOM   2500  CA  GLY   336      75.817  79.076  71.513  0.00  0.00           C  
ATOM   2501  C   GLY   336      75.347  80.447  70.945  0.00  0.00           C  
ATOM   2502  O   GLY   336      75.329  80.688  69.749  0.00  0.00           O  
ATOM   2503  N   ILE   337      74.866  81.406  71.775  0.00  0.00           N  
ATOM   2504  CA  ILE   337      74.673  82.841  71.464  0.00  0.00           C  
ATOM   2505  C   ILE   337      75.925  83.568  71.949  0.00  0.00           C  
ATOM   2506  O   ILE   337      76.658  84.100  71.121  0.00  0.00           O  
ATOM   2507  CB  ILE   337      73.298  83.486  71.863  0.00  0.00           C  
ATOM   2508  CG1 ILE   337      72.981  83.410  73.355  0.00  0.00           C  
ATOM   2509  CG2 ILE   337      72.242  82.683  70.942  0.00  0.00           C  
ATOM   2510  CD1 ILE   337      71.624  83.997  73.636  0.00  0.00           C  
ATOM   2511  N   LEU   338      76.241  83.447  73.269  0.00  0.00           N  
ATOM   2512  CA  LEU   338      77.195  84.292  73.983  0.00  0.00           C  
ATOM   2513  C   LEU   338      78.597  84.177  73.322  0.00  0.00           C  
ATOM   2514  O   LEU   338      79.370  85.114  73.367  0.00  0.00           O  
ATOM   2515  CB  LEU   338      77.257  83.877  75.488  0.00  0.00           C  
ATOM   2516  CG  LEU   338      76.113  84.401  76.338  0.00  0.00           C  
ATOM   2517  CD1 LEU   338      76.223  83.737  77.714  0.00  0.00           C  
ATOM   2518  CD2 LEU   338      76.073  85.921  76.549  0.00  0.00           C  
ATOM   2519  N   ALA   339      78.946  82.981  72.820  0.00  0.00           N  
ATOM   2520  CA  ALA   339      80.295  82.651  72.381  0.00  0.00           C  
ATOM   2521  C   ALA   339      80.591  83.029  70.896  0.00  0.00           C  
ATOM   2522  O   ALA   339      81.648  82.703  70.352  0.00  0.00           O  
ATOM   2523  CB  ALA   339      80.342  81.143  72.654  0.00  0.00           C  
ATOM   2524  N   ALA   340      79.726  83.707  70.173  0.00  0.00           N  
ATOM   2525  CA  ALA   340      79.853  84.097  68.788  0.00  0.00           C  
ATOM   2526  C   ALA   340      79.259  85.458  68.522  0.00  0.00           C  
ATOM   2527  O   ALA   340      78.133  85.625  68.987  0.00  0.00           O  
ATOM   2528  CB  ALA   340      79.309  83.001  67.890  0.00  0.00           C  
ATOM   2529  N   VAL   341      79.892  86.304  67.693  0.00  0.00           N  
ATOM   2530  CA  VAL   341      79.355  87.611  67.214  0.00  0.00           C  
ATOM   2531  C   VAL   341      78.926  88.684  68.228  0.00  0.00           C  
ATOM   2532  O   VAL   341      78.573  89.844  67.929  0.00  0.00           O  
ATOM   2533  CB  VAL   341      78.315  87.552  66.025  0.00  0.00           C  
ATOM   2534  CG1 VAL   341      78.616  88.622  64.970  0.00  0.00           C  
ATOM   2535  CG2 VAL   341      78.234  86.165  65.394  0.00  0.00           C  
ATOM   2536  N   ALA   342      78.807  88.343  69.449  0.00  0.00           N  
ATOM   2537  CA  ALA   342      78.516  89.146  70.711  0.00  0.00           C  
ATOM   2538  C   ALA   342      79.586  90.190  71.011  0.00  0.00           C  
ATOM   2539  O   ALA   342      80.089  90.147  72.106  0.00  0.00           O  
ATOM   2540  CB  ALA   342      78.314  88.168  71.882  0.00  0.00           C  
ATOM   2541  N   LEU   343      80.092  90.933  69.999  0.00  0.00           N  
ATOM   2542  CA  LEU   343      81.327  91.627  69.980  0.00  0.00           C  
ATOM   2543  C   LEU   343      81.132  93.110  69.584  0.00  0.00           C  
ATOM   2544  O   LEU   343      81.514  93.592  68.457  0.00  0.00           O  
ATOM   2545  CB  LEU   343      82.279  90.905  69.055  0.00  0.00           C  
ATOM   2546  CG  LEU   343      82.806  89.502  69.439  0.00  0.00           C  
ATOM   2547  CD1 LEU   343      83.748  89.021  68.393  0.00  0.00           C  
ATOM   2548  CD2 LEU   343      83.596  89.497  70.760  0.00  0.00           C  
ATOM   2549  N   PRO   344      80.544  93.897  70.538  0.00  0.00           N  
ATOM   2550  CA  PRO   344      80.161  95.248  70.250  0.00  0.00           C  
ATOM   2551  C   PRO   344      81.377  96.186  70.213  0.00  0.00           C  
ATOM   2552  O   PRO   344      82.117  96.315  71.220  0.00  0.00           O  
ATOM   2553  CB  PRO   344      79.172  95.662  71.411  0.00  0.00           C  
ATOM   2554  CG  PRO   344      79.547  94.810  72.612  0.00  0.00           C  
ATOM   2555  CD  PRO   344      80.029  93.592  71.865  0.00  0.00           C  
ATOM   2556  N   ALA   345      81.510  96.821  69.091  0.00  0.00           N  
ATOM   2557  CA  ALA   345      82.573  97.840  68.813  0.00  0.00           C  
ATOM   2558  C   ALA   345      84.083  97.517  69.237  0.00  0.00           C  
ATOM   2559  O   ALA   345      84.921  98.376  69.323  0.00  0.00           O  
ATOM   2560  CB  ALA   345      82.108  99.170  69.425  0.00  0.00           C  
ATOM   2561  N   TYR   346      84.379  96.265  69.638  0.00  0.00           N  
ATOM   2562  CA  TYR   346      85.692  95.884  70.022  0.00  0.00           C  
ATOM   2563  C   TYR   346      86.814  96.212  68.992  0.00  0.00           C  
ATOM   2564  O   TYR   346      87.920  96.496  69.459  0.00  0.00           O  
ATOM   2565  CB  TYR   346      85.700  94.440  70.377  0.00  0.00           C  
ATOM   2566  CG  TYR   346      84.997  94.154  71.724  0.00  0.00           C  
ATOM   2567  CD1 TYR   346      85.491  94.769  72.897  0.00  0.00           C  
ATOM   2568  CD2 TYR   346      84.020  93.206  71.736  0.00  0.00           C  
ATOM   2569  CE1 TYR   346      84.850  94.475  74.097  0.00  0.00           C  
ATOM   2570  CE2 TYR   346      83.530  92.777  72.971  0.00  0.00           C  
ATOM   2571  CZ  TYR   346      83.896  93.425  74.180  0.00  0.00           C  
ATOM   2572  OH  TYR   346      83.249  93.155  75.377  0.00  0.00           O  
ATOM   2573  N   GLN   347      86.545  96.320  67.643  0.00  0.00           N  
ATOM   2574  CA  GLN   347      87.470  96.690  66.578  0.00  0.00           C  
ATOM   2575  C   GLN   347      87.723  98.229  66.677  0.00  0.00           C  
ATOM   2576  O   GLN   347      88.884  98.550  66.801  0.00  0.00           O  
ATOM   2577  CB  GLN   347      86.964  96.290  65.239  0.00  0.00           C  
ATOM   2578  CG  GLN   347      87.907  96.799  64.125  0.00  0.00           C  
ATOM   2579  CD  GLN   347      87.801  95.777  62.967  0.00  0.00           C  
ATOM   2580  NE2 GLN   347      88.865  94.964  62.776  0.00  0.00           N  
ATOM   2581  OE1 GLN   347      86.808  95.622  62.260  0.00  0.00           O  
ATOM   2582  N   ASP   348      86.655  99.021  66.740  0.00  0.00           N  
ATOM   2583  CA  ASP   348      86.664 100.462  66.762  0.00  0.00           C  
ATOM   2584  C   ASP   348      87.461 100.857  68.004  0.00  0.00           C  
ATOM   2585  O   ASP   348      88.222 101.824  67.913  0.00  0.00           O  
ATOM   2586  CB  ASP   348      85.196 100.867  66.889  0.00  0.00           C  
ATOM   2587  CG  ASP   348      84.060 100.076  66.231  0.00  0.00           C  
ATOM   2588  OD1 ASP   348      84.327  99.058  65.608  0.00  0.00           O  
ATOM   2589  OD2 ASP   348      82.930 100.605  66.246  0.00  0.00           O1-
ATOM   2590  N   TYR   349      87.263 100.232  69.192  0.00  0.00           N  
ATOM   2591  CA  TYR   349      87.967 100.750  70.374  0.00  0.00           C  
ATOM   2592  C   TYR   349      89.508 100.678  70.327  0.00  0.00           C  
ATOM   2593  O   TYR   349      90.262 101.598  70.660  0.00  0.00           O  
ATOM   2594  CB  TYR   349      87.247 100.265  71.631  0.00  0.00           C  
ATOM   2595  CG  TYR   349      85.919 100.818  72.119  0.00  0.00           C  
ATOM   2596  CD1 TYR   349      84.826  99.916  72.267  0.00  0.00           C  
ATOM   2597  CD2 TYR   349      85.806 102.223  72.294  0.00  0.00           C  
ATOM   2598  CE1 TYR   349      83.644 100.576  72.734  0.00  0.00           C  
ATOM   2599  CE2 TYR   349      84.616 102.858  72.630  0.00  0.00           C  
ATOM   2600  CZ  TYR   349      83.538 101.993  72.850  0.00  0.00           C  
ATOM   2601  OH  TYR   349      82.375 102.547  73.053  0.00  0.00           O  
ATOM   2602  N   THR   350      89.970  99.489  69.878  0.00  0.00           N  
ATOM   2603  CA  THR   350      91.420  99.501  69.428  0.00  0.00           C  
ATOM   2604  C   THR   350      91.764 100.386  68.241  0.00  0.00           C  
ATOM   2605  O   THR   350      92.788 100.975  68.367  0.00  0.00           O  
ATOM   2606  CB  THR   350      91.981  98.046  69.189  0.00  0.00           C  
ATOM   2607  CG2 THR   350      93.399  97.965  69.539  0.00  0.00           C  
ATOM   2608  OG1 THR   350      91.276  97.098  69.930  0.00  0.00           O  
ATOM   2609  N   ALA   351      90.999 100.455  67.157  0.00  0.00           N  
ATOM   2610  CA  ALA   351      91.365 101.295  65.978  0.00  0.00           C  
ATOM   2611  C   ALA   351      91.519 102.758  66.301  0.00  0.00           C  
ATOM   2612  O   ALA   351      92.547 103.379  65.974  0.00  0.00           O  
ATOM   2613  CB  ALA   351      90.315 101.049  64.866  0.00  0.00           C  
ATOM   2614  N   ARG   352      90.583 103.291  67.062  0.00  0.00           N  
ATOM   2615  CA  ARG   352      90.658 104.626  67.579  0.00  0.00           C  
ATOM   2616  C   ARG   352      91.895 104.896  68.511  0.00  0.00           C  
ATOM   2617  O   ARG   352      92.454 105.989  68.550  0.00  0.00           O  
ATOM   2618  CB  ARG   352      89.337 104.918  68.355  0.00  0.00           C  
ATOM   2619  CG  ARG   352      88.168 105.053  67.459  0.00  0.00           C  
ATOM   2620  CD  ARG   352      86.888 105.399  68.164  0.00  0.00           C  
ATOM   2621  NE  ARG   352      86.928 106.625  68.887  0.00  0.00           N  
ATOM   2622  CZ  ARG   352      86.626 106.928  70.147  0.00  0.00           C  
ATOM   2623  NH1 ARG   352      85.960 106.122  70.911  0.00  0.00           N1+
ATOM   2624  NH2 ARG   352      87.035 108.018  70.671  0.00  0.00           N  
ATOM   2625  N   ALA   353      92.504 103.842  69.162  0.00  0.00           N  
ATOM   2626  CA  ALA   353      93.808 103.904  69.868  0.00  0.00           C  
ATOM   2627  C   ALA   353      95.010 103.736  68.941  0.00  0.00           C  
ATOM   2628  O   ALA   353      96.062 104.279  69.275  0.00  0.00           O  
ATOM   2629  CB  ALA   353      93.764 102.822  70.937  0.00  0.00           C  
ATOM   2630  N   GLN   354      94.913 102.891  67.819  0.00  0.00           N  
ATOM   2631  CA  GLN   354      95.902 102.829  66.782  0.00  0.00           C  
ATOM   2632  C   GLN   354      96.083 104.253  66.105  0.00  0.00           C  
ATOM   2633  O   GLN   354      97.220 104.717  65.990  0.00  0.00           O  
ATOM   2634  CB  GLN   354      95.506 101.772  65.743  0.00  0.00           C  
ATOM   2635  CG  GLN   354      95.478 100.388  66.443  0.00  0.00           C  
ATOM   2636  CD  GLN   354      95.306  99.223  65.489  0.00  0.00           C  
ATOM   2637  NE2 GLN   354      95.886  98.115  65.856  0.00  0.00           N  
ATOM   2638  OE1 GLN   354      94.461  99.215  64.522  0.00  0.00           O  
ATOM   2639  N   VAL   355      95.004 105.027  65.852  0.00  0.00           N  
ATOM   2640  CA  VAL   355      95.114 106.363  65.340  0.00  0.00           C  
ATOM   2641  C   VAL   355      95.687 107.301  66.404  0.00  0.00           C  
ATOM   2642  O   VAL   355      96.630 108.069  66.067  0.00  0.00           O  
ATOM   2643  CB  VAL   355      93.788 106.837  64.732  0.00  0.00           C  
ATOM   2644  CG1 VAL   355      93.720 108.263  64.157  0.00  0.00           C  
ATOM   2645  CG2 VAL   355      93.474 105.929  63.588  0.00  0.00           C  
ATOM   2646  N   SER   356      95.284 107.252  67.700  0.00  0.00           N  
ATOM   2647  CA  SER   356      95.766 108.180  68.728  0.00  0.00           C  
ATOM   2648  C   SER   356      97.191 107.967  69.150  0.00  0.00           C  
ATOM   2649  O   SER   356      97.935 108.999  69.249  0.00  0.00           O  
ATOM   2650  CB  SER   356      94.937 108.110  69.996  0.00  0.00           C  
ATOM   2651  OG  SER   356      94.995 106.897  70.633  0.00  0.00           O  
ATOM   2652  N   GLU   357      97.681 106.703  69.164  0.00  0.00           N  
ATOM   2653  CA  GLU   357      99.038 106.362  69.282  0.00  0.00           C  
ATOM   2654  C   GLU   357      99.937 106.958  68.111  0.00  0.00           C  
ATOM   2655  O   GLU   357     100.978 107.584  68.364  0.00  0.00           O  
ATOM   2656  CB  GLU   357      99.181 104.822  69.208  0.00  0.00           C  
ATOM   2657  CG  GLU   357     100.578 104.229  69.287  0.00  0.00           C  
ATOM   2658  CD  GLU   357     101.233 104.475  70.612  0.00  0.00           C  
ATOM   2659  OE1 GLU   357     100.722 105.167  71.535  0.00  0.00           O  
ATOM   2660  OE2 GLU   357     102.290 103.796  70.869  0.00  0.00           O1-
ATOM   2661  N   ALA   358      99.519 106.784  66.876  0.00  0.00           N  
ATOM   2662  CA  ALA   358     100.135 107.324  65.606  0.00  0.00           C  
ATOM   2663  C   ALA   358     100.088 108.887  65.477  0.00  0.00           C  
ATOM   2664  O   ALA   358     100.946 109.472  64.826  0.00  0.00           O  
ATOM   2665  CB  ALA   358      99.393 106.577  64.433  0.00  0.00           C  
ATOM   2666  N   ILE   359      99.125 109.518  66.059  0.00  0.00           N  
ATOM   2667  CA  ILE   359      99.028 110.922  66.263  0.00  0.00           C  
ATOM   2668  C   ILE   359     100.056 111.453  67.201  0.00  0.00           C  
ATOM   2669  O   ILE   359     100.836 112.268  66.749  0.00  0.00           O  
ATOM   2670  CB  ILE   359      97.554 111.333  66.631  0.00  0.00           C  
ATOM   2671  CG1 ILE   359      96.661 111.239  65.344  0.00  0.00           C  
ATOM   2672  CG2 ILE   359      97.577 112.708  67.260  0.00  0.00           C  
ATOM   2673  CD1 ILE   359      96.876 112.219  64.199  0.00  0.00           C  
ATOM   2674  N   LEU   360     100.210 110.845  68.360  0.00  0.00           N  
ATOM   2675  CA  LEU   360     101.329 111.206  69.193  0.00  0.00           C  
ATOM   2676  C   LEU   360     102.698 110.982  68.524  0.00  0.00           C  
ATOM   2677  O   LEU   360     103.529 111.901  68.669  0.00  0.00           O  
ATOM   2678  CB  LEU   360     101.209 110.505  70.544  0.00  0.00           C  
ATOM   2679  CG  LEU   360      99.876 110.834  71.386  0.00  0.00           C  
ATOM   2680  CD1 LEU   360      99.767 109.871  72.526  0.00  0.00           C  
ATOM   2681  CD2 LEU   360      99.918 112.233  72.002  0.00  0.00           C  
ATOM   2682  N   LEU   361     102.963 109.934  67.670  0.00  0.00           N  
ATOM   2683  CA  LEU   361     104.277 109.720  67.110  0.00  0.00           C  
ATOM   2684  C   LEU   361     104.505 110.838  66.042  0.00  0.00           C  
ATOM   2685  O   LEU   361     105.591 111.407  66.012  0.00  0.00           O  
ATOM   2686  CB  LEU   361     104.406 108.296  66.685  0.00  0.00           C  
ATOM   2687  CG  LEU   361     105.689 107.923  65.857  0.00  0.00           C  
ATOM   2688  CD1 LEU   361     106.927 108.069  66.750  0.00  0.00           C  
ATOM   2689  CD2 LEU   361     105.740 106.458  65.369  0.00  0.00           C  
ATOM   2690  N   ALA   362     103.517 111.250  65.217  0.00  0.00           N  
ATOM   2691  CA  ALA   362     103.473 112.399  64.253  0.00  0.00           C  
ATOM   2692  C   ALA   362     103.541 113.800  64.886  0.00  0.00           C  
ATOM   2693  O   ALA   362     104.120 114.650  64.281  0.00  0.00           O  
ATOM   2694  CB  ALA   362     102.296 112.280  63.347  0.00  0.00           C  
ATOM   2695  N   GLU   363     103.133 114.009  66.166  0.00  0.00           N  
ATOM   2696  CA  GLU   363     103.231 115.336  66.786  0.00  0.00           C  
ATOM   2697  C   GLU   363     104.674 115.795  67.000  0.00  0.00           C  
ATOM   2698  O   GLU   363     104.895 116.903  67.378  0.00  0.00           O  
ATOM   2699  CB  GLU   363     102.558 115.293  68.213  0.00  0.00           C  
ATOM   2700  CG  GLU   363     101.066 115.347  68.022  0.00  0.00           C  
ATOM   2701  CD  GLU   363     100.320 116.349  68.924  0.00  0.00           C  
ATOM   2702  OE1 GLU   363     100.830 116.731  70.025  0.00  0.00           O  
ATOM   2703  OE2 GLU   363      99.242 116.821  68.553  0.00  0.00           O1-
ATOM   2704  N   GLY   364     105.695 114.955  66.914  0.00  0.00           N  
ATOM   2705  CA  GLY   364     107.144 115.264  67.040  0.00  0.00           C  
ATOM   2706  C   GLY   364     107.728 116.164  65.966  0.00  0.00           C  
ATOM   2707  O   GLY   364     108.790 116.665  66.302  0.00  0.00           O  
ATOM   2708  N   GLN   365     107.017 116.395  64.914  0.00  0.00           N  
ATOM   2709  CA  GLN   365     107.387 117.377  63.833  0.00  0.00           C  
ATOM   2710  C   GLN   365     106.968 118.801  64.167  0.00  0.00           C  
ATOM   2711  O   GLN   365     107.444 119.693  63.444  0.00  0.00           O  
ATOM   2712  CB  GLN   365     106.933 116.846  62.448  0.00  0.00           C  
ATOM   2713  CG  GLN   365     107.795 115.568  62.060  0.00  0.00           C  
ATOM   2714  CD  GLN   365     107.254 115.021  60.777  0.00  0.00           C  
ATOM   2715  NE2 GLN   365     108.106 114.756  59.792  0.00  0.00           N  
ATOM   2716  OE1 GLN   365     106.061 114.806  60.628  0.00  0.00           O  
ATOM   2717  N   LYS   366     106.062 118.996  65.167  0.00  0.00           N  
ATOM   2718  CA  LYS   366     105.514 120.352  65.505  0.00  0.00           C  
ATOM   2719  C   LYS   366     106.492 121.470  66.034  0.00  0.00           C  
ATOM   2720  O   LYS   366     106.384 122.595  65.569  0.00  0.00           O  
ATOM   2721  CB  LYS   366     104.381 120.085  66.565  0.00  0.00           C  
ATOM   2722  CG  LYS   366     103.189 119.368  65.864  0.00  0.00           C  
ATOM   2723  CD  LYS   366     101.978 119.479  66.866  0.00  0.00           C  
ATOM   2724  CE  LYS   366     100.716 119.030  66.136  0.00  0.00           C  
ATOM   2725  NZ  LYS   366      99.482 119.197  66.946  0.00  0.00           N1+
ATOM   2726  N   SER   367     107.384 121.185  66.983  0.00  0.00           N  
ATOM   2727  CA  SER   367     108.168 122.260  67.646  0.00  0.00           C  
ATOM   2728  C   SER   367     108.957 123.051  66.582  0.00  0.00           C  
ATOM   2729  O   SER   367     108.955 124.296  66.698  0.00  0.00           O  
ATOM   2730  CB  SER   367     109.064 121.618  68.722  0.00  0.00           C  
ATOM   2731  OG  SER   367     108.335 121.103  69.867  0.00  0.00           O  
ATOM   2732  N   ALA   368     109.666 122.453  65.662  0.00  0.00           N  
ATOM   2733  CA  ALA   368     110.545 123.252  64.841  0.00  0.00           C  
ATOM   2734  C   ALA   368     109.771 124.125  63.787  0.00  0.00           C  
ATOM   2735  O   ALA   368     110.237 125.257  63.388  0.00  0.00           O  
ATOM   2736  CB  ALA   368     111.573 122.291  64.146  0.00  0.00           C  
ATOM   2737  N   VAL   369     108.534 123.639  63.448  0.00  0.00           N  
ATOM   2738  CA  VAL   369     107.597 124.360  62.594  0.00  0.00           C  
ATOM   2739  C   VAL   369     107.122 125.686  63.230  0.00  0.00           C  
ATOM   2740  O   VAL   369     107.074 126.764  62.671  0.00  0.00           O  
ATOM   2741  CB  VAL   369     106.476 123.513  62.037  0.00  0.00           C  
ATOM   2742  CG1 VAL   369     105.481 124.362  61.224  0.00  0.00           C  
ATOM   2743  CG2 VAL   369     106.846 122.330  61.148  0.00  0.00           C  
ATOM   2744  N   THR   370     106.772 125.652  64.572  0.00  0.00           N  
ATOM   2745  CA  THR   370     106.448 126.819  65.364  0.00  0.00           C  
ATOM   2746  C   THR   370     107.539 127.849  65.645  0.00  0.00           C  
ATOM   2747  O   THR   370     107.395 129.074  65.431  0.00  0.00           O  
ATOM   2748  CB  THR   370     105.828 126.308  66.661  0.00  0.00           C  
ATOM   2749  CG2 THR   370     104.969 127.289  67.389  0.00  0.00           C  
ATOM   2750  OG1 THR   370     104.932 125.215  66.387  0.00  0.00           O  
ATOM   2751  N   GLU   371     108.776 127.409  65.862  0.00  0.00           N  
ATOM   2752  CA  GLU   371     110.062 128.183  65.994  0.00  0.00           C  
ATOM   2753  C   GLU   371     110.512 128.774  64.737  0.00  0.00           C  
ATOM   2754  O   GLU   371     110.944 129.936  64.762  0.00  0.00           O  
ATOM   2755  CB  GLU   371     111.182 127.295  66.733  0.00  0.00           C  
ATOM   2756  CG  GLU   371     112.502 127.990  66.773  0.00  0.00           C  
ATOM   2757  CD  GLU   371     113.566 127.229  67.596  0.00  0.00           C  
ATOM   2758  OE1 GLU   371     113.311 126.074  68.071  0.00  0.00           O  
ATOM   2759  OE2 GLU   371     114.711 127.745  67.718  0.00  0.00           O1-
ATOM   2760  N   TYR   372     110.267 128.163  63.583  0.00  0.00           N  
ATOM   2761  CA  TYR   372     110.293 128.863  62.293  0.00  0.00           C  
ATOM   2762  C   TYR   372     109.293 129.948  62.181  0.00  0.00           C  
ATOM   2763  O   TYR   372     109.658 131.139  61.972  0.00  0.00           O  
ATOM   2764  CB  TYR   372     110.210 127.807  61.149  0.00  0.00           C  
ATOM   2765  CG  TYR   372     110.660 128.424  59.812  0.00  0.00           C  
ATOM   2766  CD1 TYR   372     111.973 128.100  59.353  0.00  0.00           C  
ATOM   2767  CD2 TYR   372     109.778 129.240  59.074  0.00  0.00           C  
ATOM   2768  CE1 TYR   372     112.464 128.660  58.116  0.00  0.00           C  
ATOM   2769  CE2 TYR   372     110.272 129.738  57.876  0.00  0.00           C  
ATOM   2770  CZ  TYR   372     111.557 129.449  57.399  0.00  0.00           C  
ATOM   2771  OH  TYR   372     111.947 129.969  56.268  0.00  0.00           O  
ATOM   2772  N   TYR   373     108.049 129.540  62.135  0.00  0.00           N  
ATOM   2773  CA  TYR   373     106.933 130.357  61.819  0.00  0.00           C  
ATOM   2774  C   TYR   373     106.795 131.650  62.613  0.00  0.00           C  
ATOM   2775  O   TYR   373     106.763 132.749  62.009  0.00  0.00           O  
ATOM   2776  CB  TYR   373     105.625 129.500  61.878  0.00  0.00           C  
ATOM   2777  CG  TYR   373     104.320 130.274  61.858  0.00  0.00           C  
ATOM   2778  CD1 TYR   373     103.919 130.861  60.661  0.00  0.00           C  
ATOM   2779  CD2 TYR   373     103.555 130.492  63.013  0.00  0.00           C  
ATOM   2780  CE1 TYR   373     102.804 131.714  60.650  0.00  0.00           C  
ATOM   2781  CE2 TYR   373     102.337 131.171  63.010  0.00  0.00           C  
ATOM   2782  CZ  TYR   373     102.017 131.886  61.808  0.00  0.00           C  
ATOM   2783  OH  TYR   373     101.082 132.820  61.927  0.00  0.00           O  
ATOM   2784  N   LEU   374     106.700 131.615  63.975  0.00  0.00           N  
ATOM   2785  CA  LEU   374     106.594 132.816  64.798  0.00  0.00           C  
ATOM   2786  C   LEU   374     107.814 133.799  64.569  0.00  0.00           C  
ATOM   2787  O   LEU   374     107.663 135.003  64.569  0.00  0.00           O  
ATOM   2788  CB  LEU   374     106.372 132.495  66.269  0.00  0.00           C  
ATOM   2789  CG  LEU   374     105.080 131.627  66.573  0.00  0.00           C  
ATOM   2790  CD1 LEU   374     105.202 131.319  68.119  0.00  0.00           C  
ATOM   2791  CD2 LEU   374     103.911 132.550  66.259  0.00  0.00           C  
ATOM   2792  N   ASN   375     109.025 133.299  64.283  0.00  0.00           N  
ATOM   2793  CA  ASN   375     110.183 134.126  64.145  0.00  0.00           C  
ATOM   2794  C   ASN   375     110.328 134.708  62.738  0.00  0.00           C  
ATOM   2795  O   ASN   375     110.602 135.915  62.695  0.00  0.00           O  
ATOM   2796  CB  ASN   375     111.518 133.400  64.622  0.00  0.00           C  
ATOM   2797  CG  ASN   375     111.610 133.229  66.149  0.00  0.00           C  
ATOM   2798  ND2 ASN   375     111.604 132.021  66.578  0.00  0.00           N  
ATOM   2799  OD1 ASN   375     111.776 134.182  66.920  0.00  0.00           O  
ATOM   2800  N   HIE   376     110.099 133.977  61.700  0.00  0.00           N  
ATOM   2801  CA  HIE   376     110.294 134.375  60.287  0.00  0.00           C  
ATOM   2802  C   HIE   376     109.125 135.103  59.665  0.00  0.00           C  
ATOM   2803  O   HIE   376     109.240 135.752  58.661  0.00  0.00           O  
ATOM   2804  CB  HIE   376     110.829 133.205  59.468  0.00  0.00           C  
ATOM   2805  CG  HIE   376     112.295 132.932  59.667  0.00  0.00           C  
ATOM   2806  CD2 HIE   376     112.680 131.694  60.046  0.00  0.00           C  
ATOM   2807  ND1 HIE   376     113.375 133.741  59.286  0.00  0.00           N  
ATOM   2808  CE1 HIE   376     114.434 132.961  59.442  0.00  0.00           C  
ATOM   2809  NE2 HIE   376     114.050 131.690  59.786  0.00  0.00           N  
ATOM   2810  N   GLY   377     107.947 134.884  60.262  0.00  0.00           N  
ATOM   2811  CA  GLY   377     106.614 135.400  59.816  0.00  0.00           C  
ATOM   2812  C   GLY   377     106.163 134.798  58.504  0.00  0.00           C  
ATOM   2813  O   GLY   377     105.316 135.319  57.816  0.00  0.00           O  
ATOM   2814  N   GLU   378     106.486 133.520  58.238  0.00  0.00           N  
ATOM   2815  CA  GLU   378     106.100 132.826  56.990  0.00  0.00           C  
ATOM   2816  C   GLU   378     106.181 131.306  57.258  0.00  0.00           C  
ATOM   2817  O   GLU   378     106.924 130.825  58.137  0.00  0.00           O  
ATOM   2818  CB  GLU   378     107.174 133.134  55.864  0.00  0.00           C  
ATOM   2819  CG  GLU   378     108.538 132.514  56.112  0.00  0.00           C  
ATOM   2820  CD  GLU   378     109.679 133.131  55.348  0.00  0.00           C  
ATOM   2821  OE1 GLU   378     109.441 134.059  54.545  0.00  0.00           O  
ATOM   2822  OE2 GLU   378     110.837 132.614  55.567  0.00  0.00           O1-
ATOM   2823  N   TRP   379     105.503 130.468  56.483  0.00  0.00           N  
ATOM   2824  CA  TRP   379     105.511 128.994  56.658  0.00  0.00           C  
ATOM   2825  C   TRP   379     106.705 128.259  55.999  0.00  0.00           C  
ATOM   2826  O   TRP   379     107.003 128.557  54.836  0.00  0.00           O  
ATOM   2827  CB  TRP   379     104.211 128.274  56.313  0.00  0.00           C  
ATOM   2828  CG  TRP   379     102.993 128.740  57.055  0.00  0.00           C  
ATOM   2829  CD1 TRP   379     102.116 129.687  56.638  0.00  0.00           C  
ATOM   2830  CD2 TRP   379     102.543 128.502  58.471  0.00  0.00           C  
ATOM   2831  CE2 TRP   379     101.350 129.182  58.679  0.00  0.00           C  
ATOM   2832  CE3 TRP   379     103.103 127.777  59.560  0.00  0.00           C  
ATOM   2833  NE1 TRP   379     101.272 129.962  57.604  0.00  0.00           N  
ATOM   2834  CZ2 TRP   379     100.601 129.046  59.850  0.00  0.00           C  
ATOM   2835  CZ3 TRP   379     102.357 127.563  60.759  0.00  0.00           C  
ATOM   2836  CH2 TRP   379     101.101 128.160  60.852  0.00  0.00           C  
ATOM   2837  N   PRO   380     107.289 127.189  56.622  0.00  0.00           N  
ATOM   2838  CA  PRO   380     108.452 126.452  56.045  0.00  0.00           C  
ATOM   2839  C   PRO   380     107.917 125.536  54.888  0.00  0.00           C  
ATOM   2840  O   PRO   380     106.857 124.923  55.046  0.00  0.00           O  
ATOM   2841  CB  PRO   380     109.045 125.630  57.152  0.00  0.00           C  
ATOM   2842  CG  PRO   380     107.962 125.420  58.149  0.00  0.00           C  
ATOM   2843  CD  PRO   380     107.142 126.698  57.999  0.00  0.00           C  
ATOM   2844  N   GLY   381     108.673 125.512  53.764  0.00  0.00           N  
ATOM   2845  CA  GLY   381     108.212 124.958  52.518  0.00  0.00           C  
ATOM   2846  C   GLY   381     108.376 123.466  52.410  0.00  0.00           C  
ATOM   2847  O   GLY   381     107.535 122.852  51.734  0.00  0.00           O  
ATOM   2848  N   ASP   382     109.184 122.808  53.222  0.00  0.00           N  
ATOM   2849  CA  ASP   382     109.520 121.349  53.281  0.00  0.00           C  
ATOM   2850  C   ASP   382     110.092 121.021  54.661  0.00  0.00           C  
ATOM   2851  O   ASP   382     110.548 121.889  55.409  0.00  0.00           O  
ATOM   2852  CB  ASP   382     110.555 120.995  52.157  0.00  0.00           C  
ATOM   2853  CG  ASP   382     111.828 121.747  52.194  0.00  0.00           C  
ATOM   2854  OD1 ASP   382     111.999 122.732  52.926  0.00  0.00           O  
ATOM   2855  OD2 ASP   382     112.673 121.438  51.384  0.00  0.00           O1-
ATOM   2856  N   ASN   383     110.268 119.717  54.904  0.00  0.00           N  
ATOM   2857  CA  ASN   383     110.825 119.323  56.178  0.00  0.00           C  
ATOM   2858  C   ASN   383     112.272 119.769  56.438  0.00  0.00           C  
ATOM   2859  O   ASN   383     112.564 120.101  57.578  0.00  0.00           O  
ATOM   2860  CB  ASN   383     110.749 117.808  56.254  0.00  0.00           C  
ATOM   2861  CG  ASN   383     111.730 117.159  55.312  0.00  0.00           C  
ATOM   2862  ND2 ASN   383     112.839 116.662  55.776  0.00  0.00           N  
ATOM   2863  OD1 ASN   383     111.519 117.104  54.101  0.00  0.00           O  
ATOM   2864  N   SER   384     113.029 120.132  55.310  0.00  0.00           N  
ATOM   2865  CA  SER   384     114.342 120.642  55.442  0.00  0.00           C  
ATOM   2866  C   SER   384     114.382 122.113  55.926  0.00  0.00           C  
ATOM   2867  O   SER   384     115.048 122.427  56.888  0.00  0.00           O  
ATOM   2868  CB  SER   384     114.986 120.520  54.140  0.00  0.00           C  
ATOM   2869  OG  SER   384     116.343 121.104  53.960  0.00  0.00           O  
ATOM   2870  N   SER   385     113.561 123.010  55.334  0.00  0.00           N  
ATOM   2871  CA  SER   385     113.421 124.417  55.878  0.00  0.00           C  
ATOM   2872  C   SER   385     112.772 124.492  57.262  0.00  0.00           C  
ATOM   2873  O   SER   385     113.043 125.362  58.117  0.00  0.00           O  
ATOM   2874  CB  SER   385     112.676 125.299  54.930  0.00  0.00           C  
ATOM   2875  OG  SER   385     111.377 124.693  54.680  0.00  0.00           O  
ATOM   2876  N   ALA   386     111.872 123.503  57.607  0.00  0.00           N  
ATOM   2877  CA  ALA   386     111.345 123.279  58.901  0.00  0.00           C  
ATOM   2878  C   ALA   386     112.308 122.735  59.955  0.00  0.00           C  
ATOM   2879  O   ALA   386     112.043 122.844  61.131  0.00  0.00           O  
ATOM   2880  CB  ALA   386     110.093 122.376  58.739  0.00  0.00           C  
ATOM   2881  N   GLY   387     113.361 122.067  59.478  0.00  0.00           N  
ATOM   2882  CA  GLY   387     114.419 121.600  60.331  0.00  0.00           C  
ATOM   2883  C   GLY   387     114.101 120.285  60.972  0.00  0.00           C  
ATOM   2884  O   GLY   387     114.686 119.902  62.009  0.00  0.00           O  
ATOM   2885  N   VAL   388     113.226 119.531  60.325  0.00  0.00           N  
ATOM   2886  CA  VAL   388     112.716 118.225  60.861  0.00  0.00           C  
ATOM   2887  C   VAL   388     113.001 117.003  59.905  0.00  0.00           C  
ATOM   2888  O   VAL   388     113.301 117.216  58.726  0.00  0.00           O  
ATOM   2889  CB  VAL   388     111.255 118.215  61.319  0.00  0.00           C  
ATOM   2890  CG1 VAL   388     110.886 119.515  62.023  0.00  0.00           C  
ATOM   2891  CG2 VAL   388     110.201 117.934  60.251  0.00  0.00           C  
ATOM   2892  N   ALA   389     112.838 115.748  60.367  0.00  0.00           N  
ATOM   2893  CA  ALA   389     112.988 114.480  59.581  0.00  0.00           C  
ATOM   2894  C   ALA   389     111.948 114.419  58.394  0.00  0.00           C  
ATOM   2895  O   ALA   389     110.975 115.209  58.424  0.00  0.00           O  
ATOM   2896  CB  ALA   389     112.657 113.292  60.522  0.00  0.00           C  
ATOM   2897  N   THR   390     112.255 113.588  57.413  0.00  0.00           N  
ATOM   2898  CA  THR   390     111.579 113.617  56.073  0.00  0.00           C  
ATOM   2899  C   THR   390     110.498 112.515  55.912  0.00  0.00           C  
ATOM   2900  O   THR   390     110.336 111.668  56.790  0.00  0.00           O  
ATOM   2901  CB  THR   390     112.681 113.649  54.966  0.00  0.00           C  
ATOM   2902  CG2 THR   390     113.115 112.219  54.570  0.00  0.00           C  
ATOM   2903  OG1 THR   390     112.212 114.319  53.779  0.00  0.00           O  
ATOM   2904  N   SER   391     109.828 112.488  54.758  0.00  0.00           N  
ATOM   2905  CA  SER   391     108.602 111.654  54.462  0.00  0.00           C  
ATOM   2906  C   SER   391     108.820 110.135  54.719  0.00  0.00           C  
ATOM   2907  O   SER   391     107.909 109.426  54.908  0.00  0.00           O  
ATOM   2908  CB  SER   391     108.229 111.901  53.052  0.00  0.00           C  
ATOM   2909  OG  SER   391     107.623 113.126  52.781  0.00  0.00           O  
ATOM   2910  N   ALA   392     110.096 109.715  54.841  0.00  0.00           N  
ATOM   2911  CA  ALA   392     110.348 108.277  55.081  0.00  0.00           C  
ATOM   2912  C   ALA   392     110.883 107.947  56.425  0.00  0.00           C  
ATOM   2913  O   ALA   392     111.402 106.840  56.660  0.00  0.00           O  
ATOM   2914  CB  ALA   392     111.346 107.862  53.971  0.00  0.00           C  
ATOM   2915  N   ASP   393     110.827 108.862  57.394  0.00  0.00           N  
ATOM   2916  CA  ASP   393     111.501 108.839  58.668  0.00  0.00           C  
ATOM   2917  C   ASP   393     110.448 108.654  59.809  0.00  0.00           C  
ATOM   2918  O   ASP   393     109.292 108.254  59.558  0.00  0.00           O  
ATOM   2919  CB  ASP   393     112.380 110.115  58.839  0.00  0.00           C  
ATOM   2920  CG  ASP   393     113.565 110.267  57.928  0.00  0.00           C  
ATOM   2921  OD1 ASP   393     114.100 109.384  57.281  0.00  0.00           O  
ATOM   2922  OD2 ASP   393     113.974 111.468  57.778  0.00  0.00           O1-
ATOM   2923  N   ILE   394     110.934 108.665  61.082  0.00  0.00           N  
ATOM   2924  CA  ILE   394     110.132 108.574  62.316  0.00  0.00           C  
ATOM   2925  C   ILE   394     109.648 107.130  62.572  0.00  0.00           C  
ATOM   2926  O   ILE   394     109.387 106.772  63.775  0.00  0.00           O  
ATOM   2927  CB  ILE   394     109.084 109.673  62.360  0.00  0.00           C  
ATOM   2928  CG1 ILE   394     109.860 111.017  62.370  0.00  0.00           C  
ATOM   2929  CG2 ILE   394     108.207 109.637  63.619  0.00  0.00           C  
ATOM   2930  CD1 ILE   394     108.982 112.272  62.681  0.00  0.00           C  
ATOM   2931  N   LYS   395     109.555 106.268  61.550  0.00  0.00           N  
ATOM   2932  CA  LYS   395     109.127 104.883  61.578  0.00  0.00           C  
ATOM   2933  C   LYS   395     109.346 104.181  62.903  0.00  0.00           C  
ATOM   2934  O   LYS   395     110.424 103.955  63.419  0.00  0.00           O  
ATOM   2935  CB  LYS   395     109.726 104.057  60.474  0.00  0.00           C  
ATOM   2936  CG  LYS   395     109.408 104.543  59.083  0.00  0.00           C  
ATOM   2937  CD  LYS   395     109.717 103.554  57.968  0.00  0.00           C  
ATOM   2938  CE  LYS   395     109.326 104.152  56.588  0.00  0.00           C  
ATOM   2939  NZ  LYS   395     109.197 103.055  55.528  0.00  0.00           N1+
ATOM   2940  N   GLY   396     108.247 103.701  63.438  0.00  0.00           N  
ATOM   2941  CA  GLY   396     108.069 103.222  64.776  0.00  0.00           C  
ATOM   2942  C   GLY   396     106.644 102.592  64.944  0.00  0.00           C  
ATOM   2943  O   GLY   396     106.114 102.021  63.981  0.00  0.00           O  
ATOM   2944  N   LYS   397     106.006 102.844  66.105  0.00  0.00           N  
ATOM   2945  CA  LYS   397     104.590 102.529  66.404  0.00  0.00           C  
ATOM   2946  C   LYS   397     103.615 103.047  65.293  0.00  0.00           C  
ATOM   2947  O   LYS   397     103.478 104.223  65.042  0.00  0.00           O  
ATOM   2948  CB  LYS   397     104.178 103.224  67.772  0.00  0.00           C  
ATOM   2949  CG  LYS   397     104.971 102.766  68.982  0.00  0.00           C  
ATOM   2950  CD  LYS   397     104.547 101.371  69.387  0.00  0.00           C  
ATOM   2951  CE  LYS   397     105.040 100.923  70.765  0.00  0.00           C  
ATOM   2952  NZ  LYS   397     104.460  99.651  71.306  0.00  0.00           N1+
ATOM   2953  N   TYR   398     103.055 102.083  64.493  0.00  0.00           N  
ATOM   2954  CA  TYR   398     101.890 102.378  63.636  0.00  0.00           C  
ATOM   2955  C   TYR   398     102.078 103.221  62.315  0.00  0.00           C  
ATOM   2956  O   TYR   398     101.392 102.960  61.314  0.00  0.00           O  
ATOM   2957  CB  TYR   398     100.665 102.641  64.473  0.00  0.00           C  
ATOM   2958  CG  TYR   398     100.016 101.510  65.213  0.00  0.00           C  
ATOM   2959  CD1 TYR   398     100.116 101.399  66.560  0.00  0.00           C  
ATOM   2960  CD2 TYR   398      99.492 100.434  64.477  0.00  0.00           C  
ATOM   2961  CE1 TYR   398      99.447 100.352  67.258  0.00  0.00           C  
ATOM   2962  CE2 TYR   398      99.071  99.269  65.106  0.00  0.00           C  
ATOM   2963  CZ  TYR   398      98.986  99.243  66.543  0.00  0.00           C  
ATOM   2964  OH  TYR   398      98.529  98.137  67.259  0.00  0.00           O  
ATOM   2965  N   VAL   399     102.891 104.196  62.297  0.00  0.00           N  
ATOM   2966  CA  VAL   399     103.247 105.175  61.257  0.00  0.00           C  
ATOM   2967  C   VAL   399     104.339 104.653  60.313  0.00  0.00           C  
ATOM   2968  O   VAL   399     105.399 104.115  60.651  0.00  0.00           O  
ATOM   2969  CB  VAL   399     103.651 106.484  61.894  0.00  0.00           C  
ATOM   2970  CG1 VAL   399     103.982 107.640  60.900  0.00  0.00           C  
ATOM   2971  CG2 VAL   399     102.583 107.058  62.886  0.00  0.00           C  
ATOM   2972  N   GLN   400     104.176 104.937  59.052  0.00  0.00           N  
ATOM   2973  CA  GLN   400     105.139 104.585  57.968  0.00  0.00           C  
ATOM   2974  C   GLN   400     105.408 105.765  56.937  0.00  0.00           C  
ATOM   2975  O   GLN   400     106.358 105.644  56.159  0.00  0.00           O  
ATOM   2976  CB  GLN   400     104.745 103.360  57.185  0.00  0.00           C  
ATOM   2977  CG  GLN   400     104.981 102.045  57.869  0.00  0.00           C  
ATOM   2978  CD  GLN   400     106.424 101.791  58.085  0.00  0.00           C  
ATOM   2979  NE2 GLN   400     106.975 101.719  59.303  0.00  0.00           N  
ATOM   2980  OE1 GLN   400     107.212 101.684  57.118  0.00  0.00           O  
ATOM   2981  N   SER   401     104.740 106.898  57.101  0.00  0.00           N  
ATOM   2982  CA  SER   401     105.250 108.146  56.501  0.00  0.00           C  
ATOM   2983  C   SER   401     104.844 109.427  57.255  0.00  0.00           C  
ATOM   2984  O   SER   401     103.802 109.406  57.886  0.00  0.00           O  
ATOM   2985  CB  SER   401     104.783 108.272  55.059  0.00  0.00           C  
ATOM   2986  OG  SER   401     105.224 109.355  54.358  0.00  0.00           O  
ATOM   2987  N   VAL   402     105.647 110.521  57.104  0.00  0.00           N  
ATOM   2988  CA  VAL   402     105.591 111.821  57.894  0.00  0.00           C  
ATOM   2989  C   VAL   402     106.109 112.985  57.030  0.00  0.00           C  
ATOM   2990  O   VAL   402     107.254 113.510  57.152  0.00  0.00           O  
ATOM   2991  CB  VAL   402     106.343 111.564  59.236  0.00  0.00           C  
ATOM   2992  CG1 VAL   402     105.614 110.552  60.196  0.00  0.00           C  
ATOM   2993  CG2 VAL   402     107.794 111.067  58.930  0.00  0.00           C  
ATOM   2994  N   THR   403     105.266 113.418  56.131  0.00  0.00           N  
ATOM   2995  CA  THR   403     105.444 114.448  55.190  0.00  0.00           C  
ATOM   2996  C   THR   403     105.304 115.808  55.896  0.00  0.00           C  
ATOM   2997  O   THR   403     104.305 115.941  56.626  0.00  0.00           O  
ATOM   2998  CB  THR   403     104.603 114.324  53.890  0.00  0.00           C  
ATOM   2999  CG2 THR   403     105.065 115.302  52.775  0.00  0.00           C  
ATOM   3000  OG1 THR   403     104.734 113.010  53.411  0.00  0.00           O  
ATOM   3001  N   VAL   404     106.161 116.754  55.557  0.00  0.00           N  
ATOM   3002  CA  VAL   404     105.994 118.122  55.942  0.00  0.00           C  
ATOM   3003  C   VAL   404     106.228 119.144  54.856  0.00  0.00           C  
ATOM   3004  O   VAL   404     107.283 119.080  54.264  0.00  0.00           O  
ATOM   3005  CB  VAL   404     106.793 118.493  57.211  0.00  0.00           C  
ATOM   3006  CG1 VAL   404     106.197 119.729  57.846  0.00  0.00           C  
ATOM   3007  CG2 VAL   404     106.903 117.355  58.301  0.00  0.00           C  
ATOM   3008  N   ALA   405     105.219 120.032  54.591  0.00  0.00           N  
ATOM   3009  CA  ALA   405     105.324 121.189  53.586  0.00  0.00           C  
ATOM   3010  C   ALA   405     104.367 122.371  53.818  0.00  0.00           C  
ATOM   3011  O   ALA   405     103.203 122.148  54.207  0.00  0.00           O  
ATOM   3012  CB  ALA   405     105.104 120.578  52.230  0.00  0.00           C  
ATOM   3013  N   ASN   406     104.771 123.580  53.364  0.00  0.00           N  
ATOM   3014  CA  ASN   406     103.852 124.680  53.455  0.00  0.00           C  
ATOM   3015  C   ASN   406     103.191 124.905  54.770  0.00  0.00           C  
ATOM   3016  O   ASN   406     102.114 125.498  54.806  0.00  0.00           O  
ATOM   3017  CB  ASN   406     102.943 124.742  52.188  0.00  0.00           C  
ATOM   3018  CG  ASN   406     103.734 125.043  50.971  0.00  0.00           C  
ATOM   3019  ND2 ASN   406     103.072 125.155  49.845  0.00  0.00           N  
ATOM   3020  OD1 ASN   406     104.958 125.010  50.946  0.00  0.00           O  
ATOM   3021  N   GLY   407     103.952 124.584  55.846  0.00  0.00           N  
ATOM   3022  CA  GLY   407     103.544 124.608  57.231  0.00  0.00           C  
ATOM   3023  C   GLY   407     102.298 123.693  57.650  0.00  0.00           C  
ATOM   3024  O   GLY   407     101.558 124.054  58.561  0.00  0.00           O  
ATOM   3025  N   VAL   408     102.250 122.540  57.016  0.00  0.00           N  
ATOM   3026  CA  VAL   408     101.318 121.465  57.236  0.00  0.00           C  
ATOM   3027  C   VAL   408     102.128 120.200  57.538  0.00  0.00           C  
ATOM   3028  O   VAL   408     103.016 119.870  56.737  0.00  0.00           O  
ATOM   3029  CB  VAL   408     100.301 121.288  56.109  0.00  0.00           C  
ATOM   3030  CG1 VAL   408      99.466 120.096  56.279  0.00  0.00           C  
ATOM   3031  CG2 VAL   408      99.362 122.544  56.093  0.00  0.00           C  
ATOM   3032  N   ILE   409     101.728 119.366  58.496  0.00  0.00           N  
ATOM   3033  CA  ILE   409     102.195 117.998  58.661  0.00  0.00           C  
ATOM   3034  C   ILE   409     101.202 116.962  58.069  0.00  0.00           C  
ATOM   3035  O   ILE   409      99.986 117.136  58.301  0.00  0.00           O  
ATOM   3036  CB  ILE   409     102.661 117.671  60.109  0.00  0.00           C  
ATOM   3037  CG1 ILE   409     103.753 118.623  60.658  0.00  0.00           C  
ATOM   3038  CG2 ILE   409     103.184 116.296  60.264  0.00  0.00           C  
ATOM   3039  CD1 ILE   409     103.409 118.848  62.110  0.00  0.00           C  
ATOM   3040  N   THR   410     101.581 115.783  57.467  0.00  0.00           N  
ATOM   3041  CA  THR   410     100.688 114.805  56.896  0.00  0.00           C  
ATOM   3042  C   THR   410     101.296 113.450  57.033  0.00  0.00           C  
ATOM   3043  O   THR   410     102.349 113.186  56.374  0.00  0.00           O  
ATOM   3044  CB  THR   410     100.393 115.095  55.401  0.00  0.00           C  
ATOM   3045  CG2 THR   410      99.529 114.061  54.757  0.00  0.00           C  
ATOM   3046  OG1 THR   410      99.658 116.296  55.248  0.00  0.00           O  
ATOM   3047  N   ALA   411     100.633 112.605  57.774  0.00  0.00           N  
ATOM   3048  CA  ALA   411     101.198 111.310  58.191  0.00  0.00           C  
ATOM   3049  C   ALA   411     100.336 110.098  57.716  0.00  0.00           C  
ATOM   3050  O   ALA   411      99.137 110.264  57.642  0.00  0.00           O  
ATOM   3051  CB  ALA   411     101.339 111.366  59.674  0.00  0.00           C  
ATOM   3052  N   GLN   412     100.916 108.894  57.574  0.00  0.00           N  
ATOM   3053  CA  GLN   412     100.289 107.757  56.961  0.00  0.00           C  
ATOM   3054  C   GLN   412     100.501 106.448  57.790  0.00  0.00           C  
ATOM   3055  O   GLN   412     101.590 106.191  58.238  0.00  0.00           O  
ATOM   3056  CB  GLN   412     100.740 107.617  55.543  0.00  0.00           C  
ATOM   3057  CG  GLN   412      99.894 106.597  54.764  0.00  0.00           C  
ATOM   3058  CD  GLN   412     100.166 106.592  53.278  0.00  0.00           C  
ATOM   3059  NE2 GLN   412      99.209 106.117  52.550  0.00  0.00           N  
ATOM   3060  OE1 GLN   412     101.157 107.053  52.761  0.00  0.00           O  
ATOM   3061  N   MET   413      99.401 105.712  57.993  0.00  0.00           N  
ATOM   3062  CA  MET   413      99.438 104.370  58.696  0.00  0.00           C  
ATOM   3063  C   MET   413     100.203 103.344  57.830  0.00  0.00           C  
ATOM   3064  O   MET   413     100.334 103.334  56.617  0.00  0.00           O  
ATOM   3065  CB  MET   413      98.014 103.968  58.840  0.00  0.00           C  
ATOM   3066  CG  MET   413      97.095 104.952  59.581  0.00  0.00           C  
ATOM   3067  SD  MET   413      97.746 105.507  61.162  0.00  0.00           S  
ATOM   3068  CE  MET   413      97.692 103.919  62.081  0.00  0.00           C  
ATOM   3069  N   ALA   414     100.707 102.357  58.567  0.00  0.00           N  
ATOM   3070  CA  ALA   414     101.319 101.062  58.112  0.00  0.00           C  
ATOM   3071  C   ALA   414     100.290 100.239  57.267  0.00  0.00           C  
ATOM   3072  O   ALA   414      99.064 100.353  57.371  0.00  0.00           O  
ATOM   3073  CB  ALA   414     101.764 100.383  59.391  0.00  0.00           C  
ATOM   3074  N   SER   415     100.794  99.332  56.427  0.00  0.00           N  
ATOM   3075  CA  SER   415     100.049  98.434  55.577  0.00  0.00           C  
ATOM   3076  C   SER   415      99.752  97.011  56.144  0.00  0.00           C  
ATOM   3077  O   SER   415      99.103  96.247  55.441  0.00  0.00           O  
ATOM   3078  CB  SER   415     100.744  98.412  54.211  0.00  0.00           C  
ATOM   3079  OG  SER   415     101.832  97.573  54.254  0.00  0.00           O  
ATOM   3080  N   SER   416     100.342  96.793  57.289  0.00  0.00           N  
ATOM   3081  CA  SER   416     100.062  95.562  58.053  0.00  0.00           C  
ATOM   3082  C   SER   416      99.753  95.747  59.569  0.00  0.00           C  
ATOM   3083  O   SER   416      99.988  96.837  60.130  0.00  0.00           O  
ATOM   3084  CB  SER   416     101.199  94.554  57.759  0.00  0.00           C  
ATOM   3085  OG  SER   416     102.482  94.903  58.286  0.00  0.00           O  
ATOM   3086  N   ASN   417      99.345  94.697  60.285  0.00  0.00           N  
ATOM   3087  CA  ASN   417      99.321  94.623  61.722  0.00  0.00           C  
ATOM   3088  C   ASN   417      98.446  95.735  62.402  0.00  0.00           C  
ATOM   3089  O   ASN   417      98.711  96.286  63.484  0.00  0.00           O  
ATOM   3090  CB  ASN   417     100.811  94.518  62.067  0.00  0.00           C  
ATOM   3091  CG  ASN   417     101.560  93.247  61.674  0.00  0.00           C  
ATOM   3092  ND2 ASN   417     101.294  92.209  62.414  0.00  0.00           N  
ATOM   3093  OD1 ASN   417     102.324  93.182  60.733  0.00  0.00           O  
ATOM   3094  N   VAL   418      97.439  96.098  61.665  0.00  0.00           N  
ATOM   3095  CA  VAL   418      96.531  97.238  61.914  0.00  0.00           C  
ATOM   3096  C   VAL   418      95.135  97.000  61.229  0.00  0.00           C  
ATOM   3097  O   VAL   418      95.088  96.407  60.124  0.00  0.00           O  
ATOM   3098  CB  VAL   418      97.198  98.553  61.459  0.00  0.00           C  
ATOM   3099  CG1 VAL   418      97.069  98.734  59.941  0.00  0.00           C  
ATOM   3100  CG2 VAL   418      96.605  99.707  62.177  0.00  0.00           C  
ATOM   3101  N   ASN   419      94.034  97.465  61.809  0.00  0.00           N  
ATOM   3102  CA  ASN   419      92.707  97.325  61.239  0.00  0.00           C  
ATOM   3103  C   ASN   419      92.677  97.927  59.793  0.00  0.00           C  
ATOM   3104  O   ASN   419      93.020  99.065  59.527  0.00  0.00           O  
ATOM   3105  CB  ASN   419      91.695  97.970  62.183  0.00  0.00           C  
ATOM   3106  CG  ASN   419      90.426  98.346  61.517  0.00  0.00           C  
ATOM   3107  ND2 ASN   419      89.722  99.257  62.034  0.00  0.00           N  
ATOM   3108  OD1 ASN   419      89.913  97.560  60.755  0.00  0.00           O  
ATOM   3109  N   ASN   420      92.225  97.159  58.810  0.00  0.00           N  
ATOM   3110  CA  ASN   420      91.956  97.485  57.401  0.00  0.00           C  
ATOM   3111  C   ASN   420      91.121  98.803  57.117  0.00  0.00           C  
ATOM   3112  O   ASN   420      91.334  99.470  56.086  0.00  0.00           O  
ATOM   3113  CB  ASN   420      91.201  96.317  56.752  0.00  0.00           C  
ATOM   3114  CG  ASN   420      92.063  95.061  56.835  0.00  0.00           C  
ATOM   3115  ND2 ASN   420      91.531  93.898  57.178  0.00  0.00           N  
ATOM   3116  OD1 ASN   420      93.243  95.042  56.614  0.00  0.00           O  
ATOM   3117  N   GLU   421      90.295  99.206  58.089  0.00  0.00           N  
ATOM   3118  CA  GLU   421      89.586 100.482  57.938  0.00  0.00           C  
ATOM   3119  C   GLU   421      90.660 101.652  58.047  0.00  0.00           C  
ATOM   3120  O   GLU   421      90.440 102.726  57.494  0.00  0.00           O  
ATOM   3121  CB  GLU   421      88.494 100.668  58.959  0.00  0.00           C  
ATOM   3122  CG  GLU   421      87.313  99.673  59.033  0.00  0.00           C  
ATOM   3123  CD  GLU   421      86.210  99.891  57.877  0.00  0.00           C  
ATOM   3124  OE1 GLU   421      86.511 100.813  57.054  0.00  0.00           O  
ATOM   3125  OE2 GLU   421      85.155  99.268  57.823  0.00  0.00           O1-
ATOM   3126  N   ILE   422      91.848 101.487  58.645  0.00  0.00           N  
ATOM   3127  CA  ILE   422      92.822 102.584  58.860  0.00  0.00           C  
ATOM   3128  C   ILE   422      94.214 102.235  58.338  0.00  0.00           C  
ATOM   3129  O   ILE   422      95.063 103.078  58.251  0.00  0.00           O  
ATOM   3130  CB  ILE   422      92.736 102.991  60.368  0.00  0.00           C  
ATOM   3131  CG1 ILE   422      93.355 101.855  61.221  0.00  0.00           C  
ATOM   3132  CG2 ILE   422      91.272 103.239  60.786  0.00  0.00           C  
ATOM   3133  CD1 ILE   422      93.576 102.265  62.654  0.00  0.00           C  
ATOM   3134  N   LYS   423      94.424 100.976  57.970  0.00  0.00           N  
ATOM   3135  CA  LYS   423      95.499 100.399  57.201  0.00  0.00           C  
ATOM   3136  C   LYS   423      95.687 101.225  55.942  0.00  0.00           C  
ATOM   3137  O   LYS   423      94.723 101.514  55.214  0.00  0.00           O  
ATOM   3138  CB  LYS   423      95.195  98.975  56.911  0.00  0.00           C  
ATOM   3139  CG  LYS   423      96.364  98.310  56.138  0.00  0.00           C  
ATOM   3140  CD  LYS   423      95.967  96.852  55.853  0.00  0.00           C  
ATOM   3141  CE  LYS   423      96.024  96.013  57.114  0.00  0.00           C  
ATOM   3142  NZ  LYS   423      95.833  94.598  56.883  0.00  0.00           N1+
ATOM   3143  N   SER   424      96.936 101.638  55.780  0.00  0.00           N  
ATOM   3144  CA  SER   424      97.407 102.586  54.730  0.00  0.00           C  
ATOM   3145  C   SER   424      96.691 103.987  54.639  0.00  0.00           C  
ATOM   3146  O   SER   424      97.038 104.722  53.683  0.00  0.00           O  
ATOM   3147  CB  SER   424      97.495 101.838  53.373  0.00  0.00           C  
ATOM   3148  OG  SER   424      98.541 100.838  53.482  0.00  0.00           O  
ATOM   3149  N   LYS   425      95.817 104.342  55.575  0.00  0.00           N  
ATOM   3150  CA  LYS   425      95.158 105.681  55.518  0.00  0.00           C  
ATOM   3151  C   LYS   425      96.018 106.813  55.985  0.00  0.00           C  
ATOM   3152  O   LYS   425      97.052 106.560  56.660  0.00  0.00           O  
ATOM   3153  CB  LYS   425      93.734 105.673  56.154  0.00  0.00           C  
ATOM   3154  CG  LYS   425      92.529 105.085  55.251  0.00  0.00           C  
ATOM   3155  CD  LYS   425      92.848 103.711  54.835  0.00  0.00           C  
ATOM   3156  CE  LYS   425      91.780 102.938  54.023  0.00  0.00           C  
ATOM   3157  NZ  LYS   425      92.200 101.466  54.050  0.00  0.00           N1+
ATOM   3158  N   LYS   426      95.663 108.035  55.630  0.00  0.00           N  
ATOM   3159  CA  LYS   426      96.367 109.272  55.847  0.00  0.00           C  
ATOM   3160  C   LYS   426      95.597 110.208  56.770  0.00  0.00           C  
ATOM   3161  O   LYS   426      94.352 110.120  56.767  0.00  0.00           O  
ATOM   3162  CB  LYS   426      96.661 109.988  54.479  0.00  0.00           C  
ATOM   3163  CG  LYS   426      97.551 109.269  53.510  0.00  0.00           C  
ATOM   3164  CD  LYS   426      97.587 109.917  52.162  0.00  0.00           C  
ATOM   3165  CE  LYS   426      98.646 109.316  51.291  0.00  0.00           C  
ATOM   3166  NZ  LYS   426      98.406 109.618  49.856  0.00  0.00           N1+
ATOM   3167  N   LEU   427      96.293 111.125  57.460  0.00  0.00           N  
ATOM   3168  CA  LEU   427      95.753 112.283  58.229  0.00  0.00           C  
ATOM   3169  C   LEU   427      96.704 113.439  58.213  0.00  0.00           C  
ATOM   3170  O   LEU   427      97.906 113.262  57.959  0.00  0.00           O  
ATOM   3171  CB  LEU   427      95.496 111.875  59.730  0.00  0.00           C  
ATOM   3172  CG  LEU   427      94.366 110.908  60.047  0.00  0.00           C  
ATOM   3173  CD1 LEU   427      94.250 110.705  61.625  0.00  0.00           C  
ATOM   3174  CD2 LEU   427      92.998 111.389  59.623  0.00  0.00           C  
ATOM   3175  N   SER   428      96.231 114.662  58.670  0.00  0.00           N  
ATOM   3176  CA  SER   428      97.124 115.856  58.730  0.00  0.00           C  
ATOM   3177  C   SER   428      96.978 116.590  60.094  0.00  0.00           C  
ATOM   3178  O   SER   428      95.900 116.601  60.692  0.00  0.00           O  
ATOM   3179  CB  SER   428      96.828 116.809  57.577  0.00  0.00           C  
ATOM   3180  OG  SER   428      97.223 116.334  56.280  0.00  0.00           O  
ATOM   3181  N   LEU   429      97.998 117.359  60.465  0.00  0.00           N  
ATOM   3182  CA  LEU   429      98.090 118.305  61.637  0.00  0.00           C  
ATOM   3183  C   LEU   429      98.514 119.706  61.119  0.00  0.00           C  
ATOM   3184  O   LEU   429      99.501 119.805  60.393  0.00  0.00           O  
ATOM   3185  CB  LEU   429      99.072 117.885  62.723  0.00  0.00           C  
ATOM   3186  CG  LEU   429      99.304 116.396  62.800  0.00  0.00           C  
ATOM   3187  CD1 LEU   429     100.369 116.062  63.831  0.00  0.00           C  
ATOM   3188  CD2 LEU   429      98.142 115.468  63.161  0.00  0.00           C  
ATOM   3189  N   TRP   430      97.684 120.680  61.357  0.00  0.00           N  
ATOM   3190  CA  TRP   430      97.889 122.029  60.821  0.00  0.00           C  
ATOM   3191  C   TRP   430      97.664 123.164  61.824  0.00  0.00           C  
ATOM   3192  O   TRP   430      97.339 122.932  62.967  0.00  0.00           O  
ATOM   3193  CB  TRP   430      97.137 122.238  59.490  0.00  0.00           C  
ATOM   3194  CG  TRP   430      95.574 122.227  59.617  0.00  0.00           C  
ATOM   3195  CD1 TRP   430      94.846 123.369  59.827  0.00  0.00           C  
ATOM   3196  CD2 TRP   430      94.626 121.160  59.589  0.00  0.00           C  
ATOM   3197  CE2 TRP   430      93.310 121.707  59.738  0.00  0.00           C  
ATOM   3198  CE3 TRP   430      94.749 119.736  59.350  0.00  0.00           C  
ATOM   3199  NE1 TRP   430      93.501 123.086  59.834  0.00  0.00           N  
ATOM   3200  CZ2 TRP   430      92.140 120.906  59.585  0.00  0.00           C  
ATOM   3201  CZ3 TRP   430      93.601 118.942  59.308  0.00  0.00           C  
ATOM   3202  CH2 TRP   430      92.295 119.476  59.431  0.00  0.00           C  
ATOM   3203  N   ALA   431      98.083 124.405  61.421  0.00  0.00           N  
ATOM   3204  CA  ALA   431      98.187 125.568  62.344  0.00  0.00           C  
ATOM   3205  C   ALA   431      97.909 126.928  61.718  0.00  0.00           C  
ATOM   3206  O   ALA   431      98.228 127.118  60.546  0.00  0.00           O  
ATOM   3207  CB  ALA   431      99.586 125.454  63.023  0.00  0.00           C  
ATOM   3208  N   LYS   432      97.300 127.785  62.503  0.00  0.00           N  
ATOM   3209  CA  LYS   432      96.838 129.164  62.106  0.00  0.00           C  
ATOM   3210  C   LYS   432      96.816 130.110  63.306  0.00  0.00           C  
ATOM   3211  O   LYS   432      96.687 129.645  64.433  0.00  0.00           O  
ATOM   3212  CB  LYS   432      95.565 129.097  61.300  0.00  0.00           C  
ATOM   3213  CG  LYS   432      94.775 130.442  61.194  0.00  0.00           C  
ATOM   3214  CD  LYS   432      93.516 130.283  60.444  0.00  0.00           C  
ATOM   3215  CE  LYS   432      92.707 131.664  60.357  0.00  0.00           C  
ATOM   3216  NZ  LYS   432      91.604 131.528  59.386  0.00  0.00           N1+
ATOM   3217  N   ARG   433      97.169 131.376  63.121  0.00  0.00           N  
ATOM   3218  CA  ARG   433      97.097 132.413  64.185  0.00  0.00           C  
ATOM   3219  C   ARG   433      95.671 132.822  64.546  0.00  0.00           C  
ATOM   3220  O   ARG   433      94.806 132.970  63.634  0.00  0.00           O  
ATOM   3221  CB  ARG   433      98.031 133.605  63.898  0.00  0.00           C  
ATOM   3222  CG  ARG   433      98.172 134.588  65.060  0.00  0.00           C  
ATOM   3223  CD  ARG   433      99.330 135.567  65.060  0.00  0.00           C  
ATOM   3224  NE  ARG   433      99.235 136.285  66.355  0.00  0.00           N  
ATOM   3225  CZ  ARG   433     100.225 136.778  67.066  0.00  0.00           C  
ATOM   3226  NH1 ARG   433     101.472 136.775  66.605  0.00  0.00           N1+
ATOM   3227  NH2 ARG   433     100.019 137.257  68.252  0.00  0.00           N  
ATOM   3228  N   GLN   434      95.399 132.992  65.847  0.00  0.00           N  
ATOM   3229  CA  GLN   434      94.153 133.323  66.570  0.00  0.00           C  
ATOM   3230  C   GLN   434      94.486 134.539  67.412  0.00  0.00           C  
ATOM   3231  O   GLN   434      95.566 135.171  67.327  0.00  0.00           O  
ATOM   3232  CB  GLN   434      93.560 132.085  67.224  0.00  0.00           C  
ATOM   3233  CG  GLN   434      92.924 131.045  66.348  0.00  0.00           C  
ATOM   3234  CD  GLN   434      91.675 131.505  65.611  0.00  0.00           C  
ATOM   3235  NE2 GLN   434      91.346 130.798  64.538  0.00  0.00           N  
ATOM   3236  OE1 GLN   434      90.972 132.485  65.932  0.00  0.00           O  
ATOM   3237  N   ASN   435      93.640 134.919  68.327  0.00  0.00           N  
ATOM   3238  CA  ASN   435      93.991 135.797  69.461  0.00  0.00           C  
ATOM   3239  C   ASN   435      95.176 135.240  70.289  0.00  0.00           C  
ATOM   3240  O   ASN   435      96.035 135.923  70.884  0.00  0.00           O  
ATOM   3241  CB  ASN   435      92.651 135.927  70.287  0.00  0.00           C  
ATOM   3242  CG  ASN   435      91.669 136.930  69.772  0.00  0.00           C  
ATOM   3243  ND2 ASN   435      91.078 137.696  70.657  0.00  0.00           N  
ATOM   3244  OD1 ASN   435      91.193 136.782  68.633  0.00  0.00           O  
ATOM   3245  N   GLY   436      95.368 133.908  70.280  0.00  0.00           N  
ATOM   3246  CA  GLY   436      96.686 133.333  70.661  0.00  0.00           C  
ATOM   3247  C   GLY   436      97.707 133.198  69.588  0.00  0.00           C  
ATOM   3248  O   GLY   436      97.352 132.992  68.452  0.00  0.00           O  
ATOM   3249  N   SER   437      98.991 133.179  69.861  0.00  0.00           N  
ATOM   3250  CA  SER   437     100.051 133.312  68.852  0.00  0.00           C  
ATOM   3251  C   SER   437     100.004 132.208  67.731  0.00  0.00           C  
ATOM   3252  O   SER   437     100.272 132.540  66.546  0.00  0.00           O  
ATOM   3253  CB  SER   437     101.379 133.185  69.613  0.00  0.00           C  
ATOM   3254  OG  SER   437     101.438 134.059  70.774  0.00  0.00           O  
ATOM   3255  N   VAL   438      99.833 130.925  68.111  0.00  0.00           N  
ATOM   3256  CA  VAL   438      99.333 129.895  67.196  0.00  0.00           C  
ATOM   3257  C   VAL   438      98.310 128.928  67.726  0.00  0.00           C  
ATOM   3258  O   VAL   438      98.492 128.386  68.827  0.00  0.00           O  
ATOM   3259  CB  VAL   438     100.393 129.268  66.321  0.00  0.00           C  
ATOM   3260  CG1 VAL   438     101.016 127.984  66.834  0.00  0.00           C  
ATOM   3261  CG2 VAL   438      99.983 129.055  64.822  0.00  0.00           C  
ATOM   3262  N   LYS   439      97.301 128.472  67.000  0.00  0.00           N  
ATOM   3263  CA  LYS   439      96.342 127.350  67.287  0.00  0.00           C  
ATOM   3264  C   LYS   439      96.450 126.156  66.365  0.00  0.00           C  
ATOM   3265  O   LYS   439      96.452 126.294  65.144  0.00  0.00           O  
ATOM   3266  CB  LYS   439      94.938 127.952  67.282  0.00  0.00           C  
ATOM   3267  CG  LYS   439      93.867 126.891  67.676  0.00  0.00           C  
ATOM   3268  CD  LYS   439      92.419 127.542  67.827  0.00  0.00           C  
ATOM   3269  CE  LYS   439      91.324 126.492  68.225  0.00  0.00           C  
ATOM   3270  NZ  LYS   439      90.012 127.152  68.196  0.00  0.00           N1+
ATOM   3271  N   TRP   440      96.614 124.965  66.955  0.00  0.00           N  
ATOM   3272  CA  TRP   440      96.625 123.745  66.175  0.00  0.00           C  
ATOM   3273  C   TRP   440      95.155 123.141  65.881  0.00  0.00           C  
ATOM   3274  O   TRP   440      94.173 123.262  66.654  0.00  0.00           O  
ATOM   3275  CB  TRP   440      97.637 122.717  66.841  0.00  0.00           C  
ATOM   3276  CG  TRP   440      99.128 122.959  66.658  0.00  0.00           C  
ATOM   3277  CD1 TRP   440      99.883 123.791  67.420  0.00  0.00           C  
ATOM   3278  CD2 TRP   440     100.029 122.535  65.552  0.00  0.00           C  
ATOM   3279  CE2 TRP   440     101.270 123.182  65.706  0.00  0.00           C  
ATOM   3280  CE3 TRP   440      99.818 121.842  64.361  0.00  0.00           C  
ATOM   3281  NE1 TRP   440     101.186 123.792  66.898  0.00  0.00           N  
ATOM   3282  CZ2 TRP   440     102.350 122.903  64.758  0.00  0.00           C  
ATOM   3283  CZ3 TRP   440     100.819 121.562  63.424  0.00  0.00           C  
ATOM   3284  CH2 TRP   440     102.111 122.155  63.575  0.00  0.00           C  
ATOM   3285  N   PHE   441      95.209 122.289  64.875  0.00  0.00           N  
ATOM   3286  CA  PHE   441      94.116 121.489  64.316  0.00  0.00           C  
ATOM   3287  C   PHE   441      94.614 120.133  63.811  0.00  0.00           C  
ATOM   3288  O   PHE   441      95.811 120.035  63.434  0.00  0.00           O  
ATOM   3289  CB  PHE   441      93.516 122.266  63.179  0.00  0.00           C  
ATOM   3290  CG  PHE   441      93.075 123.666  63.551  0.00  0.00           C  
ATOM   3291  CD1 PHE   441      93.934 124.728  63.294  0.00  0.00           C  
ATOM   3292  CD2 PHE   441      91.870 123.833  64.142  0.00  0.00           C  
ATOM   3293  CE1 PHE   441      93.494 126.013  63.643  0.00  0.00           C  
ATOM   3294  CE2 PHE   441      91.422 125.063  64.575  0.00  0.00           C  
ATOM   3295  CZ  PHE   441      92.267 126.202  64.353  0.00  0.00           C  
ATOM   3296  N   CYS   442      93.787 119.083  63.930  0.00  0.00           N  
ATOM   3297  CA  CYS   442      94.195 117.736  63.708  0.00  0.00           C  
ATOM   3298  C   CYS   442      92.979 117.028  62.970  0.00  0.00           C  
ATOM   3299  O   CYS   442      91.926 116.825  63.615  0.00  0.00           O  
ATOM   3300  CB  CYS   442      94.534 117.078  64.940  0.00  0.00           C  
ATOM   3301  SG  CYS   442      96.036 117.824  65.666  0.00  0.00           S  
ATOM   3302  N   GLY   443      93.108 116.543  61.742  0.00  0.00           N  
ATOM   3303  CA  GLY   443      91.995 115.863  61.091  0.00  0.00           C  
ATOM   3304  C   GLY   443      92.318 115.253  59.728  0.00  0.00           C  
ATOM   3305  O   GLY   443      93.345 114.541  59.582  0.00  0.00           O  
ATOM   3306  N   GLN   444      91.419 115.440  58.779  0.00  0.00           N  
ATOM   3307  CA  GLN   444      91.575 114.808  57.416  0.00  0.00           C  
ATOM   3308  C   GLN   444      92.813 115.340  56.639  0.00  0.00           C  
ATOM   3309  O   GLN   444      93.398 116.350  57.050  0.00  0.00           O  
ATOM   3310  CB  GLN   444      90.321 114.890  56.633  0.00  0.00           C  
ATOM   3311  CG  GLN   444      90.010 116.354  56.165  0.00  0.00           C  
ATOM   3312  CD  GLN   444      88.577 116.552  55.640  0.00  0.00           C  
ATOM   3313  NE2 GLN   444      88.234 117.712  55.221  0.00  0.00           N  
ATOM   3314  OE1 GLN   444      87.764 115.651  55.521  0.00  0.00           O  
ATOM   3315  N   PRO   445      93.237 114.712  55.557  0.00  0.00           N  
ATOM   3316  CA  PRO   445      94.308 115.262  54.707  0.00  0.00           C  
ATOM   3317  C   PRO   445      94.078 116.672  54.133  0.00  0.00           C  
ATOM   3318  O   PRO   445      93.065 116.981  53.496  0.00  0.00           O  
ATOM   3319  CB  PRO   445      94.499 114.177  53.603  0.00  0.00           C  
ATOM   3320  CG  PRO   445      93.967 112.841  54.179  0.00  0.00           C  
ATOM   3321  CD  PRO   445      92.807 113.440  55.001  0.00  0.00           C  
ATOM   3322  N   VAL   446      94.988 117.618  54.308  0.00  0.00           N  
ATOM   3323  CA  VAL   446      94.984 119.072  53.963  0.00  0.00           C  
ATOM   3324  C   VAL   446      96.272 119.628  53.392  0.00  0.00           C  
ATOM   3325  O   VAL   446      97.354 119.082  53.619  0.00  0.00           O  
ATOM   3326  CB  VAL   446      94.482 119.975  55.145  0.00  0.00           C  
ATOM   3327  CG1 VAL   446      93.147 119.516  55.799  0.00  0.00           C  
ATOM   3328  CG2 VAL   446      95.446 120.332  56.276  0.00  0.00           C  
ATOM   3329  N   THR   447      96.173 120.704  52.590  0.00  0.00           N  
ATOM   3330  CA  THR   447      97.289 121.530  51.995  0.00  0.00           C  
ATOM   3331  C   THR   447      97.019 123.004  52.069  0.00  0.00           C  
ATOM   3332  O   THR   447      95.891 123.537  52.202  0.00  0.00           O  
ATOM   3333  CB  THR   447      97.821 120.998  50.636  0.00  0.00           C  
ATOM   3334  CG2 THR   447      96.987 121.452  49.406  0.00  0.00           C  
ATOM   3335  OG1 THR   447      99.174 121.519  50.450  0.00  0.00           O  
ATOM   3336  N   ARG   448      98.145 123.733  51.964  0.00  0.00           N  
ATOM   3337  CA  ARG   448      98.265 125.192  51.926  0.00  0.00           C  
ATOM   3338  C   ARG   448      99.065 125.635  50.613  0.00  0.00           C  
ATOM   3339  O   ARG   448     100.027 125.002  50.211  0.00  0.00           O  
ATOM   3340  CB  ARG   448      98.885 125.760  53.227  0.00  0.00           C  
ATOM   3341  CG  ARG   448      99.302 127.251  53.119  0.00  0.00           C  
ATOM   3342  CD  ARG   448      99.825 127.824  54.477  0.00  0.00           C  
ATOM   3343  NE  ARG   448      98.843 127.577  55.546  0.00  0.00           N  
ATOM   3344  CZ  ARG   448      99.146 127.021  56.726  0.00  0.00           C  
ATOM   3345  NH1 ARG   448     100.112 126.166  56.993  0.00  0.00           N1+
ATOM   3346  NH2 ARG   448      98.367 127.310  57.715  0.00  0.00           N  
ATOM   3347  N   THR   449      98.597 126.695  49.986  0.00  0.00           N  
ATOM   3348  CA  THR   449      99.055 127.147  48.688  0.00  0.00           C  
ATOM   3349  C   THR   449     100.341 128.056  48.699  0.00  0.00           C  
ATOM   3350  O   THR   449     101.277 127.894  47.934  0.00  0.00           O  
ATOM   3351  CB  THR   449      98.032 127.873  47.729  0.00  0.00           C  
ATOM   3352  CG2 THR   449      98.250 127.605  46.235  0.00  0.00           C  
ATOM   3353  OG1 THR   449      96.699 127.628  48.060  0.00  0.00           O  
ATOM   3354  N   THR   450     100.478 128.933  49.744  0.00  0.00           N  
ATOM   3355  CA  THR   450     101.694 129.731  49.932  0.00  0.00           C  
ATOM   3356  C   THR   450     102.187 129.887  51.351  0.00  0.00           C  
ATOM   3357  O   THR   450     101.373 129.766  52.232  0.00  0.00           O  
ATOM   3358  CB  THR   450     101.661 131.091  49.148  0.00  0.00           C  
ATOM   3359  CG2 THR   450     100.851 132.197  49.855  0.00  0.00           C  
ATOM   3360  OG1 THR   450     103.000 131.580  49.018  0.00  0.00           O  
ATOM   3361  N   ALA   451     103.492 130.160  51.636  0.00  0.00           N  
ATOM   3362  CA  ALA   451     104.077 130.442  52.954  0.00  0.00           C  
ATOM   3363  C   ALA   451     103.432 131.622  53.727  0.00  0.00           C  
ATOM   3364  O   ALA   451     103.485 131.742  54.984  0.00  0.00           O  
ATOM   3365  CB  ALA   451     105.573 130.789  52.790  0.00  0.00           C  
ATOM   3366  N   THR   452     102.905 132.645  52.999  0.00  0.00           N  
ATOM   3367  CA  THR   452     102.331 133.828  53.660  0.00  0.00           C  
ATOM   3368  C   THR   452     100.887 133.646  54.103  0.00  0.00           C  
ATOM   3369  O   THR   452     100.349 134.562  54.729  0.00  0.00           O  
ATOM   3370  CB  THR   452     102.477 135.127  52.833  0.00  0.00           C  
ATOM   3371  CG2 THR   452     103.804 135.282  52.051  0.00  0.00           C  
ATOM   3372  OG1 THR   452     101.457 135.162  51.873  0.00  0.00           O  
ATOM   3373  N   ALA   453     100.222 132.571  53.643  0.00  0.00           N  
ATOM   3374  CA  ALA   453      98.786 132.318  53.962  0.00  0.00           C  
ATOM   3375  C   ALA   453      98.453 131.809  55.409  0.00  0.00           C  
ATOM   3376  O   ALA   453      99.127 130.917  55.864  0.00  0.00           O  
ATOM   3377  CB  ALA   453      98.194 131.318  52.990  0.00  0.00           C  
ATOM   3378  N   THR   454      97.366 132.296  55.936  0.00  0.00           N  
ATOM   3379  CA  THR   454      96.732 131.747  57.122  0.00  0.00           C  
ATOM   3380  C   THR   454      96.087 130.397  56.770  0.00  0.00           C  
ATOM   3381  O   THR   454      96.462 129.415  57.441  0.00  0.00           O  
ATOM   3382  CB  THR   454      95.640 132.665  57.607  0.00  0.00           C  
ATOM   3383  CG2 THR   454      96.190 133.789  58.510  0.00  0.00           C  
ATOM   3384  OG1 THR   454      94.872 133.288  56.635  0.00  0.00           O  
ATOM   3385  N   ASP   455      95.160 130.331  55.830  0.00  0.00           N  
ATOM   3386  CA  ASP   455      94.241 129.211  55.733  0.00  0.00           C  
ATOM   3387  C   ASP   455      94.851 127.963  55.057  0.00  0.00           C  
ATOM   3388  O   ASP   455      95.905 127.996  54.383  0.00  0.00           O  
ATOM   3389  CB  ASP   455      92.955 129.698  55.009  0.00  0.00           C  
ATOM   3390  CG  ASP   455      92.202 130.587  55.938  0.00  0.00           C  
ATOM   3391  OD1 ASP   455      92.244 130.283  57.185  0.00  0.00           O  
ATOM   3392  OD2 ASP   455      91.617 131.613  55.423  0.00  0.00           O1-
ATOM   3393  N   VAL   456      94.078 126.929  55.344  0.00  0.00           N  
ATOM   3394  CA  VAL   456      94.341 125.514  54.904  0.00  0.00           C  
ATOM   3395  C   VAL   456      93.136 124.869  54.183  0.00  0.00           C  
ATOM   3396  O   VAL   456      92.008 125.264  54.489  0.00  0.00           O  
ATOM   3397  CB  VAL   456      94.843 124.666  56.079  0.00  0.00           C  
ATOM   3398  CG1 VAL   456      95.807 123.593  55.577  0.00  0.00           C  
ATOM   3399  CG2 VAL   456      95.718 125.440  57.116  0.00  0.00           C  
ATOM   3400  N   ALA   457      93.335 123.960  53.252  0.00  0.00           N  
ATOM   3401  CA  ALA   457      92.341 123.395  52.333  0.00  0.00           C  
ATOM   3402  C   ALA   457      92.436 121.856  52.122  0.00  0.00           C  
ATOM   3403  O   ALA   457      93.511 121.216  52.070  0.00  0.00           O  
ATOM   3404  CB  ALA   457      92.448 124.092  51.005  0.00  0.00           C  
ATOM   3405  N   ALA   458      91.296 121.154  52.029  0.00  0.00           N  
ATOM   3406  CA  ALA   458      91.229 119.700  52.024  0.00  0.00           C  
ATOM   3407  C   ALA   458      91.958 119.052  50.844  0.00  0.00           C  
ATOM   3408  O   ALA   458      91.936 119.604  49.746  0.00  0.00           O  
ATOM   3409  CB  ALA   458      89.730 119.273  52.113  0.00  0.00           C  
ATOM   3410  N   ALA   459      92.383 117.785  50.965  0.00  0.00           N  
ATOM   3411  CA  ALA   459      93.112 117.020  49.930  0.00  0.00           C  
ATOM   3412  C   ALA   459      92.805 115.525  50.073  0.00  0.00           C  
ATOM   3413  O   ALA   459      93.668 114.705  50.031  0.00  0.00           O  
ATOM   3414  CB  ALA   459      94.613 117.402  50.048  0.00  0.00           C  
ATOM   3415  N   ASN   460      91.546 115.146  50.087  0.00  0.00           N  
ATOM   3416  CA  ASN   460      91.009 113.781  50.564  0.00  0.00           C  
ATOM   3417  C   ASN   460      91.324 112.626  49.630  0.00  0.00           C  
ATOM   3418  O   ASN   460      90.976 111.492  49.965  0.00  0.00           O  
ATOM   3419  CB  ASN   460      89.528 113.975  50.834  0.00  0.00           C  
ATOM   3420  CG  ASN   460      89.148 114.478  52.254  0.00  0.00           C  
ATOM   3421  ND2 ASN   460      87.902 114.911  52.420  0.00  0.00           N  
ATOM   3422  OD1 ASN   460      89.954 114.438  53.162  0.00  0.00           O  
ATOM   3423  N   GLY   461      92.051 112.778  48.541  0.00  0.00           N  
ATOM   3424  CA  GLY   461      92.548 111.737  47.630  0.00  0.00           C  
ATOM   3425  C   GLY   461      91.498 110.626  47.352  0.00  0.00           C  
ATOM   3426  O   GLY   461      91.629 109.535  47.966  0.00  0.00           O  
ATOM   3427  N   LYS   462      90.373 110.914  46.755  0.00  0.00           N  
ATOM   3428  CA  LYS   462      89.313 109.976  46.409  0.00  0.00           C  
ATOM   3429  C   LYS   462      88.853 109.046  47.563  0.00  0.00           C  
ATOM   3430  O   LYS   462      88.660 107.905  47.283  0.00  0.00           O  
ATOM   3431  CB  LYS   462      89.589 109.216  45.022  0.00  0.00           C  
ATOM   3432  CG  LYS   462      89.468 110.218  43.899  0.00  0.00           C  
ATOM   3433  CD  LYS   462      89.259 109.509  42.558  0.00  0.00           C  
ATOM   3434  CE  LYS   462      88.597 110.386  41.444  0.00  0.00           C  
ATOM   3435  NZ  LYS   462      87.915 109.580  40.343  0.00  0.00           N1+
ATOM   3436  N   THR   463      88.868 109.571  48.771  0.00  0.00           N  
ATOM   3437  CA  THR   463      88.442 108.979  50.062  0.00  0.00           C  
ATOM   3438  C   THR   463      89.167 107.706  50.525  0.00  0.00           C  
ATOM   3439  O   THR   463      89.345 107.442  51.736  0.00  0.00           O  
ATOM   3440  CB  THR   463      86.936 109.026  50.193  0.00  0.00           C  
ATOM   3441  CG2 THR   463      86.057 109.993  49.291  0.00  0.00           C  
ATOM   3442  OG1 THR   463      86.422 107.771  49.901  0.00  0.00           O  
ATOM   3443  N   ASP   464      89.702 106.954  49.559  0.00  0.00           N  
ATOM   3444  CA  ASP   464      90.501 105.790  49.990  0.00  0.00           C  
ATOM   3445  C   ASP   464      91.884 106.142  50.713  0.00  0.00           C  
ATOM   3446  O   ASP   464      92.457 105.369  51.460  0.00  0.00           O  
ATOM   3447  CB  ASP   464      90.841 104.827  48.825  0.00  0.00           C  
ATOM   3448  CG  ASP   464      89.611 104.317  48.172  0.00  0.00           C  
ATOM   3449  OD1 ASP   464      88.611 104.168  48.898  0.00  0.00           O  
ATOM   3450  OD2 ASP   464      89.655 104.058  46.931  0.00  0.00           O1-
ATOM   3451  N   ASP   465      92.396 107.367  50.497  0.00  0.00           N  
ATOM   3452  CA  ASP   465      93.474 107.951  51.382  0.00  0.00           C  
ATOM   3453  C   ASP   465      93.014 108.369  52.833  0.00  0.00           C  
ATOM   3454  O   ASP   465      93.800 108.448  53.768  0.00  0.00           O  
ATOM   3455  CB  ASP   465      94.094 109.159  50.589  0.00  0.00           C  
ATOM   3456  CG  ASP   465      95.144 108.917  49.502  0.00  0.00           C  
ATOM   3457  OD1 ASP   465      95.627 107.785  49.320  0.00  0.00           O  
ATOM   3458  OD2 ASP   465      95.588 109.980  48.986  0.00  0.00           O1-
ATOM   3459  N   LYS   466      91.738 108.390  53.047  0.00  0.00           N  
ATOM   3460  CA  LYS   466      91.112 108.995  54.360  0.00  0.00           C  
ATOM   3461  C   LYS   466      90.681 108.005  55.425  0.00  0.00           C  
ATOM   3462  O   LYS   466      89.923 107.061  55.153  0.00  0.00           O  
ATOM   3463  CB  LYS   466      90.076 110.094  53.992  0.00  0.00           C  
ATOM   3464  CG  LYS   466      89.542 110.895  55.184  0.00  0.00           C  
ATOM   3465  CD  LYS   466      88.379 111.778  54.893  0.00  0.00           C  
ATOM   3466  CE  LYS   466      87.790 112.127  56.253  0.00  0.00           C  
ATOM   3467  NZ  LYS   466      86.743 113.130  56.156  0.00  0.00           N1+
ATOM   3468  N   ILE   467      91.057 108.163  56.706  0.00  0.00           N  
ATOM   3469  CA  ILE   467      90.456 107.443  57.859  0.00  0.00           C  
ATOM   3470  C   ILE   467      88.929 107.443  57.782  0.00  0.00           C  
ATOM   3471  O   ILE   467      88.335 108.501  57.867  0.00  0.00           O  
ATOM   3472  CB  ILE   467      90.915 108.010  59.233  0.00  0.00           C  
ATOM   3473  CG1 ILE   467      92.456 107.803  59.341  0.00  0.00           C  
ATOM   3474  CG2 ILE   467      90.282 107.303  60.434  0.00  0.00           C  
ATOM   3475  CD1 ILE   467      92.897 106.329  59.487  0.00  0.00           C  
ATOM   3476  N   ASN   468      88.274 106.283  57.886  0.00  0.00           N  
ATOM   3477  CA  ASN   468      86.843 106.095  58.008  0.00  0.00           C  
ATOM   3478  C   ASN   468      86.398 106.775  59.358  0.00  0.00           C  
ATOM   3479  O   ASN   468      86.888 106.450  60.416  0.00  0.00           O  
ATOM   3480  CB  ASN   468      86.688 104.535  58.190  0.00  0.00           C  
ATOM   3481  CG  ASN   468      85.227 104.105  58.333  0.00  0.00           C  
ATOM   3482  ND2 ASN   468      84.861 102.907  57.805  0.00  0.00           N  
ATOM   3483  OD1 ASN   468      84.474 104.762  59.031  0.00  0.00           O  
ATOM   3484  N   THR   469      85.386 107.619  59.258  0.00  0.00           N  
ATOM   3485  CA  THR   469      84.791 108.408  60.366  0.00  0.00           C  
ATOM   3486  C   THR   469      84.507 107.641  61.637  0.00  0.00           C  
ATOM   3487  O   THR   469      84.722 108.188  62.739  0.00  0.00           O  
ATOM   3488  CB  THR   469      83.579 109.198  59.898  0.00  0.00           C  
ATOM   3489  CG2 THR   469      83.553 110.572  60.534  0.00  0.00           C  
ATOM   3490  OG1 THR   469      83.667 109.595  58.535  0.00  0.00           O  
ATOM   3491  N   LYS   470      84.189 106.331  61.489  0.00  0.00           N  
ATOM   3492  CA  LYS   470      83.890 105.423  62.641  0.00  0.00           C  
ATOM   3493  C   LYS   470      85.051 105.061  63.480  0.00  0.00           C  
ATOM   3494  O   LYS   470      84.911 104.519  64.596  0.00  0.00           O  
ATOM   3495  CB  LYS   470      83.214 104.112  62.095  0.00  0.00           C  
ATOM   3496  CG  LYS   470      81.904 104.296  61.301  0.00  0.00           C  
ATOM   3497  CD  LYS   470      81.618 103.023  60.483  0.00  0.00           C  
ATOM   3498  CE  LYS   470      80.513 103.245  59.406  0.00  0.00           C  
ATOM   3499  NZ  LYS   470      80.045 102.088  58.793  0.00  0.00           N1+
ATOM   3500  N   HIE   471      86.248 105.291  62.961  0.00  0.00           N  
ATOM   3501  CA  HIE   471      87.532 104.906  63.658  0.00  0.00           C  
ATOM   3502  C   HIE   471      88.378 106.133  64.118  0.00  0.00           C  
ATOM   3503  O   HIE   471      89.578 105.999  64.400  0.00  0.00           O  
ATOM   3504  CB  HIE   471      88.156 103.833  62.818  0.00  0.00           C  
ATOM   3505  CG  HIE   471      87.357 102.592  62.671  0.00  0.00           C  
ATOM   3506  CD2 HIE   471      86.447 102.340  61.712  0.00  0.00           C  
ATOM   3507  ND1 HIE   471      87.463 101.537  63.491  0.00  0.00           N  
ATOM   3508  CE1 HIE   471      86.493 100.691  63.161  0.00  0.00           C  
ATOM   3509  NE2 HIE   471      85.857 101.168  62.085  0.00  0.00           N  
ATOM   3510  N   LEU   472      87.841 107.332  64.290  0.00  0.00           N  
ATOM   3511  CA  LEU   472      88.570 108.524  64.680  0.00  0.00           C  
ATOM   3512  C   LEU   472      88.690 108.610  66.205  0.00  0.00           C  
ATOM   3513  O   LEU   472      87.674 108.290  66.885  0.00  0.00           O  
ATOM   3514  CB  LEU   472      87.981 109.804  64.038  0.00  0.00           C  
ATOM   3515  CG  LEU   472      88.275 109.866  62.482  0.00  0.00           C  
ATOM   3516  CD1 LEU   472      87.418 110.940  61.772  0.00  0.00           C  
ATOM   3517  CD2 LEU   472      89.752 110.206  62.121  0.00  0.00           C  
ATOM   3518  N   PRO   473      89.854 109.092  66.715  0.00  0.00           N  
ATOM   3519  CA  PRO   473      89.929 109.570  68.077  0.00  0.00           C  
ATOM   3520  C   PRO   473      88.805 110.625  68.440  0.00  0.00           C  
ATOM   3521  O   PRO   473      88.356 111.370  67.594  0.00  0.00           O  
ATOM   3522  CB  PRO   473      91.315 110.191  68.273  0.00  0.00           C  
ATOM   3523  CG  PRO   473      92.140 109.526  67.246  0.00  0.00           C  
ATOM   3524  CD  PRO   473      91.135 109.363  66.082  0.00  0.00           C  
ATOM   3525  N   SER   474      88.493 110.754  69.726  0.00  0.00           N  
ATOM   3526  CA  SER   474      87.462 111.714  70.085  0.00  0.00           C  
ATOM   3527  C   SER   474      87.878 113.166  69.839  0.00  0.00           C  
ATOM   3528  O   SER   474      87.065 114.068  69.982  0.00  0.00           O  
ATOM   3529  CB  SER   474      87.077 111.571  71.568  0.00  0.00           C  
ATOM   3530  OG  SER   474      88.124 111.625  72.559  0.00  0.00           O  
ATOM   3531  N   THR   475      89.174 113.395  69.534  0.00  0.00           N  
ATOM   3532  CA  THR   475      89.684 114.735  69.232  0.00  0.00           C  
ATOM   3533  C   THR   475      89.972 115.011  67.698  0.00  0.00           C  
ATOM   3534  O   THR   475      89.441 115.915  67.161  0.00  0.00           O  
ATOM   3535  CB  THR   475      90.970 115.069  70.058  0.00  0.00           C  
ATOM   3536  CG2 THR   475      90.835 115.231  71.603  0.00  0.00           C  
ATOM   3537  OG1 THR   475      91.916 114.035  69.934  0.00  0.00           O  
ATOM   3538  N   CYS   476      90.915 114.227  67.090  0.00  0.00           N  
ATOM   3539  CA  CYS   476      91.489 114.448  65.686  0.00  0.00           C  
ATOM   3540  C   CYS   476      90.483 114.105  64.584  0.00  0.00           C  
ATOM   3541  O   CYS   476      90.488 113.002  64.151  0.00  0.00           O  
ATOM   3542  CB  CYS   476      92.760 113.579  65.581  0.00  0.00           C  
ATOM   3543  SG  CYS   476      93.973 114.216  66.783  0.00  0.00           S  
ATOM   3544  N   ARG   477      89.534 115.050  64.327  0.00  0.00           N  
ATOM   3545  CA  ARG   477      88.327 114.990  63.488  0.00  0.00           C  
ATOM   3546  C   ARG   477      88.063 116.210  62.686  0.00  0.00           C  
ATOM   3547  O   ARG   477      87.034 116.356  62.014  0.00  0.00           O  
ATOM   3548  CB  ARG   477      87.117 114.563  64.331  0.00  0.00           C  
ATOM   3549  CG  ARG   477      87.314 113.250  65.046  0.00  0.00           C  
ATOM   3550  CD  ARG   477      86.040 112.596  65.586  0.00  0.00           C  
ATOM   3551  NE  ARG   477      85.635 113.311  66.851  0.00  0.00           N  
ATOM   3552  CZ  ARG   477      84.677 112.937  67.657  0.00  0.00           C  
ATOM   3553  NH1 ARG   477      83.901 111.883  67.380  0.00  0.00           N1+
ATOM   3554  NH2 ARG   477      84.412 113.462  68.739  0.00  0.00           N  
ATOM   3555  N   ASP   478      89.067 117.110  62.648  0.00  0.00           N  
ATOM   3556  CA  ASP   478      88.954 118.361  61.954  0.00  0.00           C  
ATOM   3557  C   ASP   478      88.787 118.376  60.401  0.00  0.00           C  
ATOM   3558  O   ASP   478      89.050 117.346  59.818  0.00  0.00           O  
ATOM   3559  CB  ASP   478      90.123 119.288  62.333  0.00  0.00           C  
ATOM   3560  CG  ASP   478      90.083 119.911  63.792  0.00  0.00           C  
ATOM   3561  OD1 ASP   478      88.979 120.091  64.317  0.00  0.00           O  
ATOM   3562  OD2 ASP   478      91.155 120.154  64.331  0.00  0.00           O1-
ATOM   3563  N   ASP   479      88.239 119.445  59.825  0.00  0.00           N  
ATOM   3564  CA  ASP   479      88.254 119.870  58.379  0.00  0.00           C  
ATOM   3565  C   ASP   479      88.442 121.393  58.220  0.00  0.00           C  
ATOM   3566  O   ASP   479      88.572 122.161  59.163  0.00  0.00           O  
ATOM   3567  CB  ASP   479      86.861 119.427  57.860  0.00  0.00           C  
ATOM   3568  CG  ASP   479      85.702 120.136  58.540  0.00  0.00           C  
ATOM   3569  OD1 ASP   479      85.580 121.365  58.609  0.00  0.00           O  
ATOM   3570  OD2 ASP   479      84.768 119.443  59.007  0.00  0.00           O1-
ATOM   3571  N   SER   480      88.342 121.855  56.907  0.00  0.00           N  
ATOM   3572  CA  SER   480      88.754 123.198  56.460  0.00  0.00           C  
ATOM   3573  C   SER   480      87.854 124.403  56.834  0.00  0.00           C  
ATOM   3574  O   SER   480      88.077 125.480  56.358  0.00  0.00           O  
ATOM   3575  CB  SER   480      89.101 122.998  54.959  0.00  0.00           C  
ATOM   3576  OG  SER   480      88.202 122.289  54.162  0.00  0.00           O  
ATOM   3577  N   SER   481      86.803 124.139  57.534  0.00  0.00           N  
ATOM   3578  CA  SER   481      86.138 125.217  58.247  0.00  0.00           C  
ATOM   3579  C   SER   481      86.788 125.682  59.608  0.00  0.00           C  
ATOM   3580  O   SER   481      86.562 126.729  60.092  0.00  0.00           O  
ATOM   3581  CB  SER   481      84.663 124.732  58.468  0.00  0.00           C  
ATOM   3582  OG  SER   481      84.613 123.842  59.531  0.00  0.00           O  
ATOM   3583  N   ALA   482      87.573 124.802  60.212  0.00  0.00           N  
ATOM   3584  CA  ALA   482      88.069 124.942  61.595  0.00  0.00           C  
ATOM   3585  C   ALA   482      88.772 126.301  61.911  0.00  0.00           C  
ATOM   3586  O   ALA   482      89.771 126.721  61.237  0.00  0.00           O  
ATOM   3587  CB  ALA   482      88.898 123.722  61.896  0.00  0.00           C  
ATOM   3588  N   SER   483      88.385 126.850  63.068  0.00  0.00           N  
ATOM   3589  CA  SER   483      88.922 128.076  63.699  0.00  0.00           C  
ATOM   3590  C   SER   483      89.114 127.851  65.226  0.00  0.00           C  
ATOM   3591  O   SER   483      88.379 127.099  65.894  0.00  0.00           O  
ATOM   3592  CB  SER   483      87.992 129.189  63.469  0.00  0.00           C  
ATOM   3593  OG  SER   483      88.545 130.453  63.574  0.00  0.00           O  
ATOM   3594  OXT SER   483      90.057 128.419  65.814  0.00  0.00           O1-
ATOM   3595  N   PHE   484      61.187  51.871  81.508  0.00  0.00           N  
ATOM   3596  CA  PHE   484      62.457  52.610  81.376  0.00  0.00           C  
ATOM   3597  C   PHE   484      62.581  54.028  81.854  0.00  0.00           C  
ATOM   3598  O   PHE   484      63.510  54.727  81.527  0.00  0.00           O  
ATOM   3599  CB  PHE   484      62.978  52.533  79.914  0.00  0.00           C  
ATOM   3600  CG  PHE   484      63.722  51.300  79.514  0.00  0.00           C  
ATOM   3601  CD1 PHE   484      63.604  50.787  78.195  0.00  0.00           C  
ATOM   3602  CD2 PHE   484      64.534  50.585  80.430  0.00  0.00           C  
ATOM   3603  CE1 PHE   484      64.372  49.677  77.754  0.00  0.00           C  
ATOM   3604  CE2 PHE   484      65.250  49.439  80.001  0.00  0.00           C  
ATOM   3605  CZ  PHE   484      65.216  49.078  78.702  0.00  0.00           C  
ATOM   3606  N   THR   485      61.482  54.573  82.492  0.00  0.00           N  
ATOM   3607  CA  THR   485      61.383  56.040  82.877  0.00  0.00           C  
ATOM   3608  C   THR   485      62.528  56.718  83.602  0.00  0.00           C  
ATOM   3609  O   THR   485      62.756  57.945  83.504  0.00  0.00           O  
ATOM   3610  CB  THR   485      60.006  56.377  83.595  0.00  0.00           C  
ATOM   3611  CG2 THR   485      58.791  55.480  83.181  0.00  0.00           C  
ATOM   3612  OG1 THR   485      60.046  56.128  84.933  0.00  0.00           O  
ATOM   3613  N   LEU   486      63.301  55.994  84.432  0.00  0.00           N  
ATOM   3614  CA  LEU   486      64.378  56.529  85.142  0.00  0.00           C  
ATOM   3615  C   LEU   486      65.568  56.993  84.303  0.00  0.00           C  
ATOM   3616  O   LEU   486      66.386  57.783  84.695  0.00  0.00           O  
ATOM   3617  CB  LEU   486      64.866  55.515  86.250  0.00  0.00           C  
ATOM   3618  CG  LEU   486      63.796  55.336  87.357  0.00  0.00           C  
ATOM   3619  CD1 LEU   486      64.256  54.196  88.236  0.00  0.00           C  
ATOM   3620  CD2 LEU   486      63.471  56.529  88.242  0.00  0.00           C  
ATOM   3621  N   ILE   487      65.652  56.475  83.023  0.00  0.00           N  
ATOM   3622  CA  ILE   487      66.754  56.734  82.072  0.00  0.00           C  
ATOM   3623  C   ILE   487      66.995  58.222  81.800  0.00  0.00           C  
ATOM   3624  O   ILE   487      68.145  58.650  81.871  0.00  0.00           O  
ATOM   3625  CB  ILE   487      66.523  55.903  80.781  0.00  0.00           C  
ATOM   3626  CG1 ILE   487      66.764  54.486  81.272  0.00  0.00           C  
ATOM   3627  CG2 ILE   487      67.410  56.374  79.599  0.00  0.00           C  
ATOM   3628  CD1 ILE   487      66.768  53.315  80.252  0.00  0.00           C  
ATOM   3629  N   GLU   488      65.945  59.051  81.683  0.00  0.00           N  
ATOM   3630  CA  GLU   488      66.112  60.481  81.459  0.00  0.00           C  
ATOM   3631  C   GLU   488      66.753  61.087  82.658  0.00  0.00           C  
ATOM   3632  O   GLU   488      67.750  61.857  82.530  0.00  0.00           O  
ATOM   3633  CB  GLU   488      64.766  61.125  81.107  0.00  0.00           C  
ATOM   3634  CG  GLU   488      64.913  62.607  80.722  0.00  0.00           C  
ATOM   3635  CD  GLU   488      63.813  63.215  79.870  0.00  0.00           C  
ATOM   3636  OE1 GLU   488      62.891  62.463  79.424  0.00  0.00           O  
ATOM   3637  OE2 GLU   488      63.635  64.461  79.952  0.00  0.00           O1-
ATOM   3638  N   LEU   489      66.323  60.775  83.871  0.00  0.00           N  
ATOM   3639  CA  LEU   489      66.916  61.336  85.064  0.00  0.00           C  
ATOM   3640  C   LEU   489      68.301  60.961  85.367  0.00  0.00           C  
ATOM   3641  O   LEU   489      68.984  61.739  86.028  0.00  0.00           O  
ATOM   3642  CB  LEU   489      65.996  61.026  86.296  0.00  0.00           C  
ATOM   3643  CG  LEU   489      64.574  61.603  86.275  0.00  0.00           C  
ATOM   3644  CD1 LEU   489      63.776  60.965  87.393  0.00  0.00           C  
ATOM   3645  CD2 LEU   489      64.490  63.074  86.452  0.00  0.00           C  
ATOM   3646  N   MET   490      68.745  59.816  84.870  0.00  0.00           N  
ATOM   3647  CA  MET   490      70.144  59.339  84.806  0.00  0.00           C  
ATOM   3648  C   MET   490      70.964  59.945  83.682  0.00  0.00           C  
ATOM   3649  O   MET   490      72.196  60.137  83.870  0.00  0.00           O  
ATOM   3650  CB  MET   490      70.134  57.832  84.654  0.00  0.00           C  
ATOM   3651  CG  MET   490      69.657  57.117  85.868  0.00  0.00           C  
ATOM   3652  SD  MET   490      70.150  55.403  85.945  0.00  0.00           S  
ATOM   3653  CE  MET   490      69.113  54.839  84.609  0.00  0.00           C  
ATOM   3654  N   ILE   491      70.418  60.250  82.503  0.00  0.00           N  
ATOM   3655  CA  ILE   491      71.003  61.208  81.564  0.00  0.00           C  
ATOM   3656  C   ILE   491      71.098  62.590  82.189  0.00  0.00           C  
ATOM   3657  O   ILE   491      72.165  63.202  82.209  0.00  0.00           O  
ATOM   3658  CB  ILE   491      70.115  61.213  80.249  0.00  0.00           C  
ATOM   3659  CG1 ILE   491      70.507  59.764  79.603  0.00  0.00           C  
ATOM   3660  CG2 ILE   491      70.587  62.342  79.301  0.00  0.00           C  
ATOM   3661  CD1 ILE   491      69.537  59.256  78.489  0.00  0.00           C  
ATOM   3662  N   VAL   492      70.073  63.084  82.953  0.00  0.00           N  
ATOM   3663  CA  VAL   492      70.052  64.512  83.511  0.00  0.00           C  
ATOM   3664  C   VAL   492      71.257  64.702  84.456  0.00  0.00           C  
ATOM   3665  O   VAL   492      72.140  65.467  84.208  0.00  0.00           O  
ATOM   3666  CB  VAL   492      68.675  65.009  84.097  0.00  0.00           C  
ATOM   3667  CG1 VAL   492      68.828  66.234  85.068  0.00  0.00           C  
ATOM   3668  CG2 VAL   492      67.594  65.312  83.076  0.00  0.00           C  
ATOM   3669  N   ILE   493      71.365  63.906  85.507  0.00  0.00           N  
ATOM   3670  CA  ILE   493      72.445  64.053  86.532  0.00  0.00           C  
ATOM   3671  C   ILE   493      73.851  63.844  85.913  0.00  0.00           C  
ATOM   3672  O   ILE   493      74.783  64.472  86.380  0.00  0.00           O  
ATOM   3673  CB  ILE   493      72.244  63.119  87.800  0.00  0.00           C  
ATOM   3674  CG1 ILE   493      72.237  61.608  87.358  0.00  0.00           C  
ATOM   3675  CG2 ILE   493      70.902  63.513  88.417  0.00  0.00           C  
ATOM   3676  CD1 ILE   493      71.958  60.601  88.487  0.00  0.00           C  
ATOM   3677  N   ALA   494      73.990  63.067  84.844  0.00  0.00           N  
ATOM   3678  CA  ALA   494      75.191  62.824  84.109  0.00  0.00           C  
ATOM   3679  C   ALA   494      75.626  64.122  83.424  0.00  0.00           C  
ATOM   3680  O   ALA   494      76.776  64.431  83.466  0.00  0.00           O  
ATOM   3681  CB  ALA   494      75.108  61.640  83.145  0.00  0.00           C  
ATOM   3682  N   ILE   495      74.708  64.859  82.831  0.00  0.00           N  
ATOM   3683  CA  ILE   495      74.987  66.098  82.115  0.00  0.00           C  
ATOM   3684  C   ILE   495      75.293  67.325  83.025  0.00  0.00           C  
ATOM   3685  O   ILE   495      76.160  68.114  82.817  0.00  0.00           O  
ATOM   3686  CB  ILE   495      73.879  66.441  81.060  0.00  0.00           C  
ATOM   3687  CG1 ILE   495      73.880  65.423  79.850  0.00  0.00           C  
ATOM   3688  CG2 ILE   495      73.887  67.859  80.513  0.00  0.00           C  
ATOM   3689  CD1 ILE   495      72.566  65.345  78.976  0.00  0.00           C  
ATOM   3690  N   VAL   496      74.583  67.375  84.193  0.00  0.00           N  
ATOM   3691  CA  VAL   496      74.996  68.255  85.315  0.00  0.00           C  
ATOM   3692  C   VAL   496      76.422  67.891  85.826  0.00  0.00           C  
ATOM   3693  O   VAL   496      77.222  68.813  86.042  0.00  0.00           O  
ATOM   3694  CB  VAL   496      73.985  68.484  86.454  0.00  0.00           C  
ATOM   3695  CG1 VAL   496      74.231  69.710  87.248  0.00  0.00           C  
ATOM   3696  CG2 VAL   496      72.658  68.669  85.888  0.00  0.00           C  
ATOM   3697  N   GLY   497      76.841  66.621  85.820  0.00  0.00           N  
ATOM   3698  CA  GLY   497      78.219  66.174  86.047  0.00  0.00           C  
ATOM   3699  C   GLY   497      79.249  66.739  85.041  0.00  0.00           C  
ATOM   3700  O   GLY   497      80.481  66.570  85.241  0.00  0.00           O  
ATOM   3701  N   ILE   498      78.823  67.387  83.949  0.00  0.00           N  
ATOM   3702  CA  ILE   498      79.767  68.110  82.970  0.00  0.00           C  
ATOM   3703  C   ILE   498      79.462  69.626  82.857  0.00  0.00           C  
ATOM   3704  O   ILE   498      80.387  70.417  82.738  0.00  0.00           O  
ATOM   3705  CB  ILE   498      79.875  67.346  81.608  0.00  0.00           C  
ATOM   3706  CG1 ILE   498      78.999  68.016  80.476  0.00  0.00           C  
ATOM   3707  CG2 ILE   498      79.707  65.814  81.812  0.00  0.00           C  
ATOM   3708  CD1 ILE   498      78.587  67.042  79.371  0.00  0.00           C  
ATOM   3709  N   LEU   499      78.186  70.035  82.987  0.00  0.00           N  
ATOM   3710  CA  LEU   499      77.749  71.387  83.106  0.00  0.00           C  
ATOM   3711  C   LEU   499      78.322  72.113  84.368  0.00  0.00           C  
ATOM   3712  O   LEU   499      78.743  73.258  84.242  0.00  0.00           O  
ATOM   3713  CB  LEU   499      76.285  71.631  82.901  0.00  0.00           C  
ATOM   3714  CG  LEU   499      75.768  71.200  81.515  0.00  0.00           C  
ATOM   3715  CD1 LEU   499      74.290  71.303  81.477  0.00  0.00           C  
ATOM   3716  CD2 LEU   499      76.391  72.107  80.435  0.00  0.00           C  
ATOM   3717  N   ALA   500      78.324  71.414  85.525  0.00  0.00           N  
ATOM   3718  CA  ALA   500      78.871  71.871  86.739  0.00  0.00           C  
ATOM   3719  C   ALA   500      80.395  72.075  86.674  0.00  0.00           C  
ATOM   3720  O   ALA   500      80.847  73.143  87.119  0.00  0.00           O  
ATOM   3721  CB  ALA   500      78.519  70.936  87.876  0.00  0.00           C  
ATOM   3722  N   ALA   501      81.176  71.153  86.138  0.00  0.00           N  
ATOM   3723  CA  ALA   501      82.693  71.048  86.475  0.00  0.00           C  
ATOM   3724  C   ALA   501      83.497  70.388  85.351  0.00  0.00           C  
ATOM   3725  O   ALA   501      82.923  69.596  84.571  0.00  0.00           O  
ATOM   3726  CB  ALA   501      82.918  70.500  87.810  0.00  0.00           C  
ATOM   3727  N   VAL   502      84.842  70.680  85.394  0.00  0.00           N  
ATOM   3728  CA  VAL   502      85.853  70.309  84.338  0.00  0.00           C  
ATOM   3729  C   VAL   502      85.802  71.197  83.093  0.00  0.00           C  
ATOM   3730  O   VAL   502      86.897  71.428  82.440  0.00  0.00           O  
ATOM   3731  CB  VAL   502      85.812  68.816  83.941  0.00  0.00           C  
ATOM   3732  CG1 VAL   502      87.132  68.472  83.184  0.00  0.00           C  
ATOM   3733  CG2 VAL   502      85.693  67.813  85.057  0.00  0.00           C  
ATOM   3734  N   ALA   503      84.652  71.689  82.782  0.00  0.00           N  
ATOM   3735  CA  ALA   503      84.363  72.661  81.735  0.00  0.00           C  
ATOM   3736  C   ALA   503      85.070  73.993  81.848  0.00  0.00           C  
ATOM   3737  O   ALA   503      84.616  75.007  82.430  0.00  0.00           O  
ATOM   3738  CB  ALA   503      82.810  72.861  81.572  0.00  0.00           C  
ATOM   3739  N   LEU   504      86.356  74.020  81.337  0.00  0.00           N  
ATOM   3740  CA  LEU   504      87.445  75.005  81.517  0.00  0.00           C  
ATOM   3741  C   LEU   504      88.154  75.444  80.198  0.00  0.00           C  
ATOM   3742  O   LEU   504      89.394  75.406  80.060  0.00  0.00           O  
ATOM   3743  CB  LEU   504      88.479  74.563  82.580  0.00  0.00           C  
ATOM   3744  CG  LEU   504      87.969  74.347  84.002  0.00  0.00           C  
ATOM   3745  CD1 LEU   504      89.098  73.750  84.829  0.00  0.00           C  
ATOM   3746  CD2 LEU   504      87.721  75.674  84.670  0.00  0.00           C  
ATOM   3747  N   PRO   505      87.419  75.982  79.177  0.00  0.00           N  
ATOM   3748  CA  PRO   505      87.907  76.289  77.815  0.00  0.00           C  
ATOM   3749  C   PRO   505      89.100  77.272  77.715  0.00  0.00           C  
ATOM   3750  O   PRO   505      88.923  78.515  77.784  0.00  0.00           O  
ATOM   3751  CB  PRO   505      86.698  76.806  77.005  0.00  0.00           C  
ATOM   3752  CG  PRO   505      85.779  77.335  78.110  0.00  0.00           C  
ATOM   3753  CD  PRO   505      85.955  76.381  79.282  0.00  0.00           C  
ATOM   3754  N   ALA   506      90.354  76.850  77.620  0.00  0.00           N  
ATOM   3755  CA  ALA   506      91.632  77.536  77.561  0.00  0.00           C  
ATOM   3756  C   ALA   506      91.841  78.553  78.674  0.00  0.00           C  
ATOM   3757  O   ALA   506      92.745  79.399  78.521  0.00  0.00           O  
ATOM   3758  CB  ALA   506      91.748  78.132  76.120  0.00  0.00           C  
ATOM   3759  N   TYR   507      91.069  78.538  79.766  0.00  0.00           N  
ATOM   3760  CA  TYR   507      91.088  79.672  80.692  0.00  0.00           C  
ATOM   3761  C   TYR   507      92.457  80.122  81.328  0.00  0.00           C  
ATOM   3762  O   TYR   507      92.519  81.314  81.715  0.00  0.00           O  
ATOM   3763  CB  TYR   507      90.135  79.417  81.875  0.00  0.00           C  
ATOM   3764  CG  TYR   507      88.609  79.419  81.633  0.00  0.00           C  
ATOM   3765  CD1 TYR   507      88.032  80.263  80.710  0.00  0.00           C  
ATOM   3766  CD2 TYR   507      87.781  78.573  82.407  0.00  0.00           C  
ATOM   3767  CE1 TYR   507      86.674  80.213  80.436  0.00  0.00           C  
ATOM   3768  CE2 TYR   507      86.381  78.544  82.203  0.00  0.00           C  
ATOM   3769  CZ  TYR   507      85.839  79.333  81.215  0.00  0.00           C  
ATOM   3770  OH  TYR   507      84.460  79.387  80.985  0.00  0.00           O  
ATOM   3771  N   GLN   508      93.420  79.219  81.485  0.00  0.00           N  
ATOM   3772  CA  GLN   508      94.602  79.422  82.150  0.00  0.00           C  
ATOM   3773  C   GLN   508      95.712  80.194  81.415  0.00  0.00           C  
ATOM   3774  O   GLN   508      96.526  80.846  82.027  0.00  0.00           O  
ATOM   3775  CB  GLN   508      95.131  78.024  82.633  0.00  0.00           C  
ATOM   3776  CG  GLN   508      96.305  78.155  83.649  0.00  0.00           C  
ATOM   3777  CD  GLN   508      96.730  76.810  84.291  0.00  0.00           C  
ATOM   3778  NE2 GLN   508      96.898  76.796  85.588  0.00  0.00           N  
ATOM   3779  OE1 GLN   508      96.753  75.750  83.662  0.00  0.00           O  
ATOM   3780  N   ASP   509      95.589  80.132  80.043  0.00  0.00           N  
ATOM   3781  CA  ASP   509      96.368  80.952  79.153  0.00  0.00           C  
ATOM   3782  C   ASP   509      95.989  82.408  79.220  0.00  0.00           C  
ATOM   3783  O   ASP   509      96.761  83.319  79.325  0.00  0.00           O  
ATOM   3784  CB  ASP   509      96.248  80.401  77.740  0.00  0.00           C  
ATOM   3785  CG  ASP   509      96.742  78.970  77.506  0.00  0.00           C  
ATOM   3786  OD1 ASP   509      97.359  78.358  78.401  0.00  0.00           O  
ATOM   3787  OD2 ASP   509      96.332  78.418  76.478  0.00  0.00           O1-
ATOM   3788  N   TYR   510      94.644  82.700  79.265  0.00  0.00           N  
ATOM   3789  CA  TYR   510      94.016  84.009  79.325  0.00  0.00           C  
ATOM   3790  C   TYR   510      94.434  84.811  80.615  0.00  0.00           C  
ATOM   3791  O   TYR   510      95.167  85.882  80.468  0.00  0.00           O  
ATOM   3792  CB  TYR   510      92.548  83.882  79.063  0.00  0.00           C  
ATOM   3793  CG  TYR   510      92.200  83.699  77.628  0.00  0.00           C  
ATOM   3794  CD1 TYR   510      91.658  82.428  77.258  0.00  0.00           C  
ATOM   3795  CD2 TYR   510      92.385  84.691  76.655  0.00  0.00           C  
ATOM   3796  CE1 TYR   510      91.499  82.150  75.901  0.00  0.00           C  
ATOM   3797  CE2 TYR   510      92.082  84.438  75.325  0.00  0.00           C  
ATOM   3798  CZ  TYR   510      91.668  83.127  74.935  0.00  0.00           C  
ATOM   3799  OH  TYR   510      91.298  82.932  73.647  0.00  0.00           O  
ATOM   3800  N   THR   511      94.325  84.284  81.790  0.00  0.00           N  
ATOM   3801  CA  THR   511      94.899  84.932  82.997  0.00  0.00           C  
ATOM   3802  C   THR   511      96.441  85.137  83.045  0.00  0.00           C  
ATOM   3803  O   THR   511      96.921  86.214  83.202  0.00  0.00           O  
ATOM   3804  CB  THR   511      94.455  84.288  84.294  0.00  0.00           C  
ATOM   3805  CG2 THR   511      94.153  85.335  85.365  0.00  0.00           C  
ATOM   3806  OG1 THR   511      93.318  83.474  84.075  0.00  0.00           O  
ATOM   3807  N   ALA   512      97.211  84.115  82.680  0.00  0.00           N  
ATOM   3808  CA  ALA   512      98.672  84.072  82.688  0.00  0.00           C  
ATOM   3809  C   ALA   512      99.199  85.134  81.707  0.00  0.00           C  
ATOM   3810  O   ALA   512     100.062  85.897  82.037  0.00  0.00           O  
ATOM   3811  CB  ALA   512      99.141  82.616  82.333  0.00  0.00           C  
ATOM   3812  N   ARG   513      98.560  85.349  80.542  0.00  0.00           N  
ATOM   3813  CA  ARG   513      98.864  86.475  79.578  0.00  0.00           C  
ATOM   3814  C   ARG   513      98.647  87.894  80.255  0.00  0.00           C  
ATOM   3815  O   ARG   513      99.535  88.714  80.327  0.00  0.00           O  
ATOM   3816  CB  ARG   513      98.091  86.341  78.294  0.00  0.00           C  
ATOM   3817  CG  ARG   513      98.547  85.217  77.429  0.00  0.00           C  
ATOM   3818  CD  ARG   513      97.540  85.106  76.239  0.00  0.00           C  
ATOM   3819  NE  ARG   513      97.533  86.243  75.336  0.00  0.00           N  
ATOM   3820  CZ  ARG   513      97.251  86.264  73.975  0.00  0.00           C  
ATOM   3821  NH1 ARG   513      97.291  85.168  73.225  0.00  0.00           N1+
ATOM   3822  NH2 ARG   513      97.066  87.356  73.422  0.00  0.00           N  
ATOM   3823  N   ALA   514      97.430  88.040  80.820  0.00  0.00           N  
ATOM   3824  CA  ALA   514      97.172  89.192  81.687  0.00  0.00           C  
ATOM   3825  C   ALA   514      98.212  89.381  82.841  0.00  0.00           C  
ATOM   3826  O   ALA   514      98.724  90.549  82.930  0.00  0.00           O  
ATOM   3827  CB  ALA   514      95.804  89.165  82.317  0.00  0.00           C  
ATOM   3828  N   GLN   515      98.698  88.367  83.578  0.00  0.00           N  
ATOM   3829  CA  GLN   515      99.803  88.466  84.533  0.00  0.00           C  
ATOM   3830  C   GLN   515     101.191  88.912  83.905  0.00  0.00           C  
ATOM   3831  O   GLN   515     101.933  89.666  84.513  0.00  0.00           O  
ATOM   3832  CB  GLN   515      99.918  87.187  85.291  0.00  0.00           C  
ATOM   3833  CG  GLN   515      98.665  86.927  86.088  0.00  0.00           C  
ATOM   3834  CD  GLN   515      98.729  85.542  86.793  0.00  0.00           C  
ATOM   3835  NE2 GLN   515      98.254  85.575  88.012  0.00  0.00           N  
ATOM   3836  OE1 GLN   515      98.984  84.502  86.250  0.00  0.00           O  
ATOM   3837  N   VAL   516     101.521  88.413  82.707  0.00  0.00           N  
ATOM   3838  CA  VAL   516     102.706  88.806  82.007  0.00  0.00           C  
ATOM   3839  C   VAL   516     102.654  90.293  81.479  0.00  0.00           C  
ATOM   3840  O   VAL   516     103.563  91.088  81.695  0.00  0.00           O  
ATOM   3841  CB  VAL   516     103.022  87.861  80.767  0.00  0.00           C  
ATOM   3842  CG1 VAL   516     104.241  88.205  79.972  0.00  0.00           C  
ATOM   3843  CG2 VAL   516     103.287  86.491  81.329  0.00  0.00           C  
ATOM   3844  N   SER   517     101.539  90.756  80.920  0.00  0.00           N  
ATOM   3845  CA  SER   517     101.383  92.151  80.455  0.00  0.00           C  
ATOM   3846  C   SER   517     101.526  93.150  81.620  0.00  0.00           C  
ATOM   3847  O   SER   517     102.273  94.034  81.376  0.00  0.00           O  
ATOM   3848  CB  SER   517     100.123  92.351  79.640  0.00  0.00           C  
ATOM   3849  OG  SER   517      98.958  92.420  80.488  0.00  0.00           O  
ATOM   3850  N   GLU   518     100.959  92.861  82.803  0.00  0.00           N  
ATOM   3851  CA  GLU   518     101.216  93.617  84.063  0.00  0.00           C  
ATOM   3852  C   GLU   518     102.673  93.630  84.547  0.00  0.00           C  
ATOM   3853  O   GLU   518     103.200  94.624  84.997  0.00  0.00           O  
ATOM   3854  CB  GLU   518     100.323  93.025  85.067  0.00  0.00           C  
ATOM   3855  CG  GLU   518     100.322  93.644  86.512  0.00  0.00           C  
ATOM   3856  CD  GLU   518      99.536  94.998  86.544  0.00  0.00           C  
ATOM   3857  OE1 GLU   518      99.378  95.670  85.535  0.00  0.00           O  
ATOM   3858  OE2 GLU   518      99.013  95.353  87.641  0.00  0.00           O1-
ATOM   3859  N   ALA   519     103.243  92.492  84.514  0.00  0.00           N  
ATOM   3860  CA  ALA   519     104.664  92.376  84.813  0.00  0.00           C  
ATOM   3861  C   ALA   519     105.532  93.268  83.877  0.00  0.00           C  
ATOM   3862  O   ALA   519     106.350  94.076  84.330  0.00  0.00           O  
ATOM   3863  CB  ALA   519     105.085  90.926  84.742  0.00  0.00           C  
ATOM   3864  N   ILE   520     105.221  93.238  82.608  0.00  0.00           N  
ATOM   3865  CA  ILE   520     105.764  94.139  81.579  0.00  0.00           C  
ATOM   3866  C   ILE   520     105.483  95.624  81.803  0.00  0.00           C  
ATOM   3867  O   ILE   520     106.431  96.451  81.889  0.00  0.00           O  
ATOM   3868  CB  ILE   520     105.454  93.656  80.149  0.00  0.00           C  
ATOM   3869  CG1 ILE   520     106.099  92.305  79.919  0.00  0.00           C  
ATOM   3870  CG2 ILE   520     105.858  94.695  79.033  0.00  0.00           C  
ATOM   3871  CD1 ILE   520     107.650  92.242  79.893  0.00  0.00           C  
ATOM   3872  N   LEU   521     104.225  95.954  82.016  0.00  0.00           N  
ATOM   3873  CA  LEU   521     103.811  97.312  82.395  0.00  0.00           C  
ATOM   3874  C   LEU   521     104.599  97.870  83.559  0.00  0.00           C  
ATOM   3875  O   LEU   521     104.902  99.098  83.559  0.00  0.00           O  
ATOM   3876  CB  LEU   521     102.286  97.401  82.593  0.00  0.00           C  
ATOM   3877  CG  LEU   521     101.384  97.184  81.342  0.00  0.00           C  
ATOM   3878  CD1 LEU   521      99.922  96.889  81.811  0.00  0.00           C  
ATOM   3879  CD2 LEU   521     101.405  98.451  80.558  0.00  0.00           C  
ATOM   3880  N   LEU   522     104.898  97.147  84.667  0.00  0.00           N  
ATOM   3881  CA  LEU   522     105.717  97.657  85.787  0.00  0.00           C  
ATOM   3882  C   LEU   522     107.266  97.633  85.555  0.00  0.00           C  
ATOM   3883  O   LEU   522     107.945  98.559  86.041  0.00  0.00           O  
ATOM   3884  CB  LEU   522     105.310  96.852  86.980  0.00  0.00           C  
ATOM   3885  CG  LEU   522     106.059  97.127  88.202  0.00  0.00           C  
ATOM   3886  CD1 LEU   522     105.851  98.526  88.720  0.00  0.00           C  
ATOM   3887  CD2 LEU   522     105.658  96.285  89.406  0.00  0.00           C  
ATOM   3888  N   ALA   523     107.716  96.655  84.723  0.00  0.00           N  
ATOM   3889  CA  ALA   523     109.092  96.437  84.409  0.00  0.00           C  
ATOM   3890  C   ALA   523     109.617  97.537  83.433  0.00  0.00           C  
ATOM   3891  O   ALA   523     110.767  97.893  83.439  0.00  0.00           O  
ATOM   3892  CB  ALA   523     109.412  95.020  83.915  0.00  0.00           C  
ATOM   3893  N   GLU   524     108.704  98.088  82.607  0.00  0.00           N  
ATOM   3894  CA  GLU   524     109.042  99.044  81.582  0.00  0.00           C  
ATOM   3895  C   GLU   524     109.509 100.439  82.072  0.00  0.00           C  
ATOM   3896  O   GLU   524     109.988 101.239  81.183  0.00  0.00           O  
ATOM   3897  CB  GLU   524     107.838  99.148  80.649  0.00  0.00           C  
ATOM   3898  CG  GLU   524     107.914  98.206  79.545  0.00  0.00           C  
ATOM   3899  CD  GLU   524     106.782  98.416  78.490  0.00  0.00           C  
ATOM   3900  OE1 GLU   524     105.803  99.173  78.733  0.00  0.00           O  
ATOM   3901  OE2 GLU   524     106.871  97.793  77.421  0.00  0.00           O1-
ATOM   3902  N   GLY   525     109.506 100.726  83.385  0.00  0.00           N  
ATOM   3903  CA  GLY   525     109.927 101.971  84.019  0.00  0.00           C  
ATOM   3904  C   GLY   525     111.370 102.414  83.633  0.00  0.00           C  
ATOM   3905  O   GLY   525     111.541 103.614  83.667  0.00  0.00           O  
ATOM   3906  N   GLN   526     112.320 101.573  83.355  0.00  0.00           N  
ATOM   3907  CA  GLN   526     113.669 101.943  82.900  0.00  0.00           C  
ATOM   3908  C   GLN   526     113.650 102.488  81.514  0.00  0.00           C  
ATOM   3909  O   GLN   526     114.709 103.000  81.147  0.00  0.00           O  
ATOM   3910  CB  GLN   526     114.545 100.706  83.022  0.00  0.00           C  
ATOM   3911  CG  GLN   526     114.890 100.526  84.531  0.00  0.00           C  
ATOM   3912  CD  GLN   526     115.680  99.248  84.834  0.00  0.00           C  
ATOM   3913  NE2 GLN   526     116.198  99.023  86.003  0.00  0.00           N  
ATOM   3914  OE1 GLN   526     115.762  98.331  84.000  0.00  0.00           O  
ATOM   3915  N   LYS   527     112.608 102.292  80.678  0.00  0.00           N  
ATOM   3916  CA  LYS   527     112.648 102.778  79.282  0.00  0.00           C  
ATOM   3917  C   LYS   527     113.088 104.220  79.033  0.00  0.00           C  
ATOM   3918  O   LYS   527     114.007 104.483  78.272  0.00  0.00           O  
ATOM   3919  CB  LYS   527     111.449 102.449  78.464  0.00  0.00           C  
ATOM   3920  CG  LYS   527     111.261 100.953  78.088  0.00  0.00           C  
ATOM   3921  CD  LYS   527     109.888 100.630  77.458  0.00  0.00           C  
ATOM   3922  CE  LYS   527     110.006  99.413  76.533  0.00  0.00           C  
ATOM   3923  NZ  LYS   527     108.668  99.096  75.921  0.00  0.00           N1+
ATOM   3924  N   SER   528     112.457 105.157  79.675  0.00  0.00           N  
ATOM   3925  CA  SER   528     112.626 106.605  79.427  0.00  0.00           C  
ATOM   3926  C   SER   528     114.065 107.082  79.677  0.00  0.00           C  
ATOM   3927  O   SER   528     114.586 107.890  78.953  0.00  0.00           O  
ATOM   3928  CB  SER   528     111.625 107.327  80.288  0.00  0.00           C  
ATOM   3929  OG  SER   528     110.400 107.265  79.662  0.00  0.00           O  
ATOM   3930  N   ALA   529     114.649 106.593  80.843  0.00  0.00           N  
ATOM   3931  CA  ALA   529     115.973 106.776  81.320  0.00  0.00           C  
ATOM   3932  C   ALA   529     116.986 106.191  80.312  0.00  0.00           C  
ATOM   3933  O   ALA   529     118.005 106.830  80.019  0.00  0.00           O  
ATOM   3934  CB  ALA   529     116.035 106.311  82.809  0.00  0.00           C  
ATOM   3935  N   VAL   530     116.799 104.967  79.843  0.00  0.00           N  
ATOM   3936  CA  VAL   530     117.786 104.274  78.980  0.00  0.00           C  
ATOM   3937  C   VAL   530     117.819 104.935  77.627  0.00  0.00           C  
ATOM   3938  O   VAL   530     118.916 105.161  77.111  0.00  0.00           O  
ATOM   3939  CB  VAL   530     117.388 102.719  78.750  0.00  0.00           C  
ATOM   3940  CG1 VAL   530     118.019 101.971  77.539  0.00  0.00           C  
ATOM   3941  CG2 VAL   530     117.804 101.932  79.945  0.00  0.00           C  
ATOM   3942  N   THR   531     116.644 105.242  77.092  0.00  0.00           N  
ATOM   3943  CA  THR   531     116.446 106.105  75.954  0.00  0.00           C  
ATOM   3944  C   THR   531     117.064 107.475  76.075  0.00  0.00           C  
ATOM   3945  O   THR   531     117.897 107.872  75.289  0.00  0.00           O  
ATOM   3946  CB  THR   531     114.980 106.182  75.554  0.00  0.00           C  
ATOM   3947  CG2 THR   531     114.918 106.666  74.084  0.00  0.00           C  
ATOM   3948  OG1 THR   531     114.469 104.893  75.549  0.00  0.00           O  
ATOM   3949  N   GLU   532     116.963 108.118  77.206  0.00  0.00           N  
ATOM   3950  CA  GLU   532     117.512 109.494  77.514  0.00  0.00           C  
ATOM   3951  C   GLU   532     119.096 109.475  77.546  0.00  0.00           C  
ATOM   3952  O   GLU   532     119.763 110.492  77.249  0.00  0.00           O  
ATOM   3953  CB  GLU   532     116.993 110.005  78.843  0.00  0.00           C  
ATOM   3954  CG  GLU   532     117.395 111.458  79.182  0.00  0.00           C  
ATOM   3955  CD  GLU   532     117.111 111.749  80.665  0.00  0.00           C  
ATOM   3956  OE1 GLU   532     116.975 110.876  81.545  0.00  0.00           O  
ATOM   3957  OE2 GLU   532     117.176 112.906  81.051  0.00  0.00           O1-
ATOM   3958  N   TYR   533     119.708 108.347  77.950  0.00  0.00           N  
ATOM   3959  CA  TYR   533     121.143 108.066  77.837  0.00  0.00           C  
ATOM   3960  C   TYR   533     121.409 107.932  76.345  0.00  0.00           C  
ATOM   3961  O   TYR   533     122.284 108.609  75.742  0.00  0.00           O  
ATOM   3962  CB  TYR   533     121.495 106.798  78.658  0.00  0.00           C  
ATOM   3963  CG  TYR   533     122.992 106.683  78.810  0.00  0.00           C  
ATOM   3964  CD1 TYR   533     123.632 107.183  79.945  0.00  0.00           C  
ATOM   3965  CD2 TYR   533     123.716 106.108  77.730  0.00  0.00           C  
ATOM   3966  CE1 TYR   533     125.042 106.988  80.056  0.00  0.00           C  
ATOM   3967  CE2 TYR   533     125.073 105.965  77.765  0.00  0.00           C  
ATOM   3968  CZ  TYR   533     125.750 106.368  78.964  0.00  0.00           C  
ATOM   3969  OH  TYR   533     127.118 106.246  79.015  0.00  0.00           O  
ATOM   3970  N   TYR   534     120.760 107.001  75.637  0.00  0.00           N  
ATOM   3971  CA  TYR   534     121.091 106.587  74.316  0.00  0.00           C  
ATOM   3972  C   TYR   534     121.117 107.652  73.219  0.00  0.00           C  
ATOM   3973  O   TYR   534     122.049 107.694  72.424  0.00  0.00           O  
ATOM   3974  CB  TYR   534     120.585 105.210  73.929  0.00  0.00           C  
ATOM   3975  CG  TYR   534     120.600 104.897  72.415  0.00  0.00           C  
ATOM   3976  CD1 TYR   534     121.737 104.257  71.862  0.00  0.00           C  
ATOM   3977  CD2 TYR   534     119.536 105.180  71.569  0.00  0.00           C  
ATOM   3978  CE1 TYR   534     121.891 104.094  70.460  0.00  0.00           C  
ATOM   3979  CE2 TYR   534     119.683 105.110  70.132  0.00  0.00           C  
ATOM   3980  CZ  TYR   534     120.931 104.674  69.570  0.00  0.00           C  
ATOM   3981  OH  TYR   534     121.074 104.773  68.214  0.00  0.00           O  
ATOM   3982  N   LEU   535     120.214 108.656  73.355  0.00  0.00           N  
ATOM   3983  CA  LEU   535     120.098 109.725  72.289  0.00  0.00           C  
ATOM   3984  C   LEU   535     121.029 110.896  72.579  0.00  0.00           C  
ATOM   3985  O   LEU   535     121.002 111.867  71.834  0.00  0.00           O  
ATOM   3986  CB  LEU   535     118.648 110.149  72.279  0.00  0.00           C  
ATOM   3987  CG  LEU   535     117.644 109.034  71.901  0.00  0.00           C  
ATOM   3988  CD1 LEU   535     116.171 109.510  71.954  0.00  0.00           C  
ATOM   3989  CD2 LEU   535     117.767 108.404  70.556  0.00  0.00           C  
ATOM   3990  N   ASN   536     121.806 110.821  73.690  0.00  0.00           N  
ATOM   3991  CA  ASN   536     122.863 111.810  74.033  0.00  0.00           C  
ATOM   3992  C   ASN   536     124.260 111.153  74.043  0.00  0.00           C  
ATOM   3993  O   ASN   536     125.225 111.855  73.745  0.00  0.00           O  
ATOM   3994  CB  ASN   536     122.508 112.298  75.479  0.00  0.00           C  
ATOM   3995  CG  ASN   536     121.445 113.372  75.334  0.00  0.00           C  
ATOM   3996  ND2 ASN   536     120.289 113.101  75.893  0.00  0.00           N  
ATOM   3997  OD1 ASN   536     121.700 114.482  74.914  0.00  0.00           O  
ATOM   3998  N   HIE   537     124.350 109.843  74.334  0.00  0.00           N  
ATOM   3999  CA  HIE   537     125.549 109.077  74.277  0.00  0.00           C  
ATOM   4000  C   HIE   537     125.890 108.331  72.993  0.00  0.00           C  
ATOM   4001  O   HIE   537     127.102 108.086  72.757  0.00  0.00           O  
ATOM   4002  CB  HIE   537     125.632 108.021  75.454  0.00  0.00           C  
ATOM   4003  CG  HIE   537     126.016 108.749  76.725  0.00  0.00           C  
ATOM   4004  CD2 HIE   537     125.216 109.525  77.478  0.00  0.00           C  
ATOM   4005  ND1 HIE   537     127.349 108.969  77.205  0.00  0.00           N  
ATOM   4006  CE1 HIE   537     127.214 109.817  78.263  0.00  0.00           C  
ATOM   4007  NE2 HIE   537     125.952 110.059  78.551  0.00  0.00           N  
ATOM   4008  N   GLY   538     124.949 108.017  72.119  0.00  0.00           N  
ATOM   4009  CA  GLY   538     125.095 107.167  70.942  0.00  0.00           C  
ATOM   4010  C   GLY   538     125.512 105.723  71.277  0.00  0.00           C  
ATOM   4011  O   GLY   538     125.013 104.761  70.600  0.00  0.00           O  
ATOM   4012  N   GLU   539     126.329 105.496  72.246  0.00  0.00           N  
ATOM   4013  CA  GLU   539     126.364 104.200  72.951  0.00  0.00           C  
ATOM   4014  C   GLU   539     125.182 103.977  73.935  0.00  0.00           C  
ATOM   4015  O   GLU   539     124.559 104.915  74.374  0.00  0.00           O  
ATOM   4016  CB  GLU   539     127.710 104.018  73.764  0.00  0.00           C  
ATOM   4017  CG  GLU   539     128.008 105.143  74.717  0.00  0.00           C  
ATOM   4018  CD  GLU   539     129.285 104.885  75.585  0.00  0.00           C  
ATOM   4019  OE1 GLU   539     130.167 104.189  75.082  0.00  0.00           O  
ATOM   4020  OE2 GLU   539     129.269 105.308  76.729  0.00  0.00           O1-
ATOM   4021  N   TRP   540     124.743 102.775  74.231  0.00  0.00           N  
ATOM   4022  CA  TRP   540     123.875 102.366  75.269  0.00  0.00           C  
ATOM   4023  C   TRP   540     124.429 102.536  76.747  0.00  0.00           C  
ATOM   4024  O   TRP   540     125.669 102.514  76.917  0.00  0.00           O  
ATOM   4025  CB  TRP   540     123.462 100.918  74.935  0.00  0.00           C  
ATOM   4026  CG  TRP   540     122.927 100.508  73.601  0.00  0.00           C  
ATOM   4027  CD1 TRP   540     123.720 100.013  72.611  0.00  0.00           C  
ATOM   4028  CD2 TRP   540     121.604 100.896  72.963  0.00  0.00           C  
ATOM   4029  CE2 TRP   540     121.686 100.513  71.611  0.00  0.00           C  
ATOM   4030  CE3 TRP   540     120.391 101.405  73.458  0.00  0.00           C  
ATOM   4031  NE1 TRP   540     122.958  99.978  71.460  0.00  0.00           N  
ATOM   4032  CZ2 TRP   540     120.595 100.739  70.768  0.00  0.00           C  
ATOM   4033  CZ3 TRP   540     119.335 101.621  72.560  0.00  0.00           C  
ATOM   4034  CH2 TRP   540     119.448 101.387  71.201  0.00  0.00           C  
ATOM   4035  N   PRO   541     123.549 102.592  77.781  0.00  0.00           N  
ATOM   4036  CA  PRO   541     123.921 102.501  79.181  0.00  0.00           C  
ATOM   4037  C   PRO   541     124.191 101.036  79.493  0.00  0.00           C  
ATOM   4038  O   PRO   541     123.347 100.143  79.319  0.00  0.00           O  
ATOM   4039  CB  PRO   541     122.819 103.154  80.033  0.00  0.00           C  
ATOM   4040  CG  PRO   541     121.638 102.826  79.115  0.00  0.00           C  
ATOM   4041  CD  PRO   541     122.153 102.879  77.689  0.00  0.00           C  
ATOM   4042  N   GLY   542     125.350 100.793  80.135  0.00  0.00           N  
ATOM   4043  CA  GLY   542     125.694  99.454  80.579  0.00  0.00           C  
ATOM   4044  C   GLY   542     124.953  98.952  81.804  0.00  0.00           C  
ATOM   4045  O   GLY   542     124.956  97.739  82.028  0.00  0.00           O  
ATOM   4046  N   ASP   543     124.359  99.834  82.695  0.00  0.00           N  
ATOM   4047  CA  ASP   543     123.540  99.428  83.843  0.00  0.00           C  
ATOM   4048  C   ASP   543     122.654 100.520  84.316  0.00  0.00           C  
ATOM   4049  O   ASP   543     122.480 101.627  83.710  0.00  0.00           O  
ATOM   4050  CB  ASP   543     124.548  99.052  84.999  0.00  0.00           C  
ATOM   4051  CG  ASP   543     125.576 100.111  85.326  0.00  0.00           C  
ATOM   4052  OD1 ASP   543     125.451 101.323  85.206  0.00  0.00           O  
ATOM   4053  OD2 ASP   543     126.581  99.744  85.933  0.00  0.00           O1-
ATOM   4054  N   ASN   544     121.911 100.328  85.394  0.00  0.00           N  
ATOM   4055  CA  ASN   544     121.003 101.314  85.875  0.00  0.00           C  
ATOM   4056  C   ASN   544     121.650 102.542  86.518  0.00  0.00           C  
ATOM   4057  O   ASN   544     121.041 103.646  86.613  0.00  0.00           O  
ATOM   4058  CB  ASN   544     120.087 100.620  86.883  0.00  0.00           C  
ATOM   4059  CG  ASN   544     120.800 100.225  88.104  0.00  0.00           C  
ATOM   4060  ND2 ASN   544     120.764 101.066  89.087  0.00  0.00           N  
ATOM   4061  OD1 ASN   544     121.331  99.182  88.219  0.00  0.00           O  
ATOM   4062  N   SER   545     122.938 102.342  86.822  0.00  0.00           N  
ATOM   4063  CA  SER   545     123.759 103.402  87.398  0.00  0.00           C  
ATOM   4064  C   SER   545     123.927 104.437  86.300  0.00  0.00           C  
ATOM   4065  O   SER   545     123.451 105.560  86.472  0.00  0.00           O  
ATOM   4066  CB  SER   545     125.076 102.924  87.952  0.00  0.00           C  
ATOM   4067  OG  SER   545     125.808 103.959  88.620  0.00  0.00           O  
ATOM   4068  N   SER   546     124.472 104.107  85.134  0.00  0.00           N  
ATOM   4069  CA  SER   546     124.795 105.101  84.065  0.00  0.00           C  
ATOM   4070  C   SER   546     123.449 105.644  83.500  0.00  0.00           C  
ATOM   4071  O   SER   546     123.252 106.780  83.277  0.00  0.00           O  
ATOM   4072  CB  SER   546     125.760 104.559  83.062  0.00  0.00           C  
ATOM   4073  OG  SER   546     125.236 103.644  82.155  0.00  0.00           O  
ATOM   4074  N   ALA   547     122.421 104.801  83.381  0.00  0.00           N  
ATOM   4075  CA  ALA   547     121.040 105.327  83.079  0.00  0.00           C  
ATOM   4076  C   ALA   547     120.497 106.336  84.088  0.00  0.00           C  
ATOM   4077  O   ALA   547     119.621 107.182  83.761  0.00  0.00           O  
ATOM   4078  CB  ALA   547     120.066 104.143  82.808  0.00  0.00           C  
ATOM   4079  N   GLY   548     121.001 106.364  85.335  0.00  0.00           N  
ATOM   4080  CA  GLY   548     120.474 107.197  86.467  0.00  0.00           C  
ATOM   4081  C   GLY   548     119.055 106.748  86.863  0.00  0.00           C  
ATOM   4082  O   GLY   548     118.130 107.594  86.758  0.00  0.00           O  
ATOM   4083  N   VAL   549     118.857 105.476  87.192  0.00  0.00           N  
ATOM   4084  CA  VAL   549     117.601 104.949  87.784  0.00  0.00           C  
ATOM   4085  C   VAL   549     117.905 103.718  88.652  0.00  0.00           C  
ATOM   4086  O   VAL   549     119.107 103.409  88.826  0.00  0.00           O  
ATOM   4087  CB  VAL   549     116.609 104.545  86.649  0.00  0.00           C  
ATOM   4088  CG1 VAL   549     115.888 105.751  86.098  0.00  0.00           C  
ATOM   4089  CG2 VAL   549     117.281 103.954  85.402  0.00  0.00           C  
ATOM   4090  N   ALA   550     116.880 103.184  89.376  0.00  0.00           N  
ATOM   4091  CA  ALA   550     116.979 102.042  90.359  0.00  0.00           C  
ATOM   4092  C   ALA   550     117.316 100.666  89.703  0.00  0.00           C  
ATOM   4093  O   ALA   550     117.187 100.519  88.484  0.00  0.00           O  
ATOM   4094  CB  ALA   550     115.590 101.923  91.092  0.00  0.00           C  
ATOM   4095  N   THR   551     117.449  99.568  90.420  0.00  0.00           N  
ATOM   4096  CA  THR   551     117.972  98.226  90.081  0.00  0.00           C  
ATOM   4097  C   THR   551     117.060  97.036  90.283  0.00  0.00           C  
ATOM   4098  O   THR   551     115.996  97.310  90.797  0.00  0.00           O  
ATOM   4099  CB  THR   551     119.433  98.122  90.519  0.00  0.00           C  
ATOM   4100  CG2 THR   551     119.462  97.616  91.937  0.00  0.00           C  
ATOM   4101  OG1 THR   551     120.125  97.215  89.712  0.00  0.00           O  
ATOM   4102  N   SER   552     117.430  95.829  89.977  0.00  0.00           N  
ATOM   4103  CA  SER   552     116.648  94.600  90.180  0.00  0.00           C  
ATOM   4104  C   SER   552     116.428  94.172  91.634  0.00  0.00           C  
ATOM   4105  O   SER   552     115.673  93.277  91.881  0.00  0.00           O  
ATOM   4106  CB  SER   552     117.401  93.456  89.447  0.00  0.00           C  
ATOM   4107  OG  SER   552     117.618  93.774  88.079  0.00  0.00           O  
ATOM   4108  N   ALA   553     116.844  94.945  92.671  0.00  0.00           N  
ATOM   4109  CA  ALA   553     116.431  94.920  94.044  0.00  0.00           C  
ATOM   4110  C   ALA   553     115.100  95.649  94.205  0.00  0.00           C  
ATOM   4111  O   ALA   553     114.515  95.404  95.297  0.00  0.00           O  
ATOM   4112  CB  ALA   553     117.495  95.492  94.916  0.00  0.00           C  
ATOM   4113  N   ASP   554     114.567  96.546  93.221  0.00  0.00           N  
ATOM   4114  CA  ASP   554     113.661  97.720  93.287  0.00  0.00           C  
ATOM   4115  C   ASP   554     112.575  97.535  92.177  0.00  0.00           C  
ATOM   4116  O   ASP   554     112.554  96.563  91.410  0.00  0.00           O  
ATOM   4117  CB  ASP   554     114.411  98.995  93.074  0.00  0.00           C  
ATOM   4118  CG  ASP   554     115.732  99.032  93.789  0.00  0.00           C  
ATOM   4119  OD1 ASP   554     115.820  98.622  94.983  0.00  0.00           O  
ATOM   4120  OD2 ASP   554     116.761  99.421  93.228  0.00  0.00           O1-
ATOM   4121  N   ILE   555     111.652  98.500  92.164  0.00  0.00           N  
ATOM   4122  CA  ILE   555     110.578  98.577  91.219  0.00  0.00           C  
ATOM   4123  C   ILE   555     109.454  97.537  91.507  0.00  0.00           C  
ATOM   4124  O   ILE   555     108.337  97.589  90.989  0.00  0.00           O  
ATOM   4125  CB  ILE   555     111.077  98.742  89.769  0.00  0.00           C  
ATOM   4126  CG1 ILE   555     111.636 100.138  89.532  0.00  0.00           C  
ATOM   4127  CG2 ILE   555     110.022  98.551  88.678  0.00  0.00           C  
ATOM   4128  CD1 ILE   555     112.705 100.244  88.460  0.00  0.00           C  
ATOM   4129  N   LYS   556     109.826  96.503  92.219  0.00  0.00           N  
ATOM   4130  CA  LYS   556     108.991  95.323  92.584  0.00  0.00           C  
ATOM   4131  C   LYS   556     107.602  95.699  93.208  0.00  0.00           C  
ATOM   4132  O   LYS   556     107.606  96.293  94.310  0.00  0.00           O  
ATOM   4133  CB  LYS   556     109.798  94.384  93.517  0.00  0.00           C  
ATOM   4134  CG  LYS   556     111.150  93.993  93.020  0.00  0.00           C  
ATOM   4135  CD  LYS   556     111.863  92.861  93.730  0.00  0.00           C  
ATOM   4136  CE  LYS   556     113.165  92.568  93.078  0.00  0.00           C  
ATOM   4137  NZ  LYS   556     113.851  91.390  93.630  0.00  0.00           N1+
ATOM   4138  N   GLY   557     106.575  95.246  92.476  0.00  0.00           N  
ATOM   4139  CA  GLY   557     105.213  95.503  92.805  0.00  0.00           C  
ATOM   4140  C   GLY   557     104.408  94.329  92.301  0.00  0.00           C  
ATOM   4141  O   GLY   557     104.789  93.205  92.593  0.00  0.00           O  
ATOM   4142  N   LYS   558     103.349  94.506  91.497  0.00  0.00           N  
ATOM   4143  CA  LYS   558     102.708  93.462  90.743  0.00  0.00           C  
ATOM   4144  C   LYS   558     103.703  92.598  89.930  0.00  0.00           C  
ATOM   4145  O   LYS   558     104.259  93.014  88.948  0.00  0.00           O  
ATOM   4146  CB  LYS   558     101.585  94.091  89.858  0.00  0.00           C  
ATOM   4147  CG  LYS   558     100.571  94.978  90.636  0.00  0.00           C  
ATOM   4148  CD  LYS   558      99.548  94.297  91.565  0.00  0.00           C  
ATOM   4149  CE  LYS   558      98.337  95.218  91.791  0.00  0.00           C  
ATOM   4150  NZ  LYS   558      97.292  94.608  92.580  0.00  0.00           N1+
ATOM   4151  N   TYR   559     103.901  91.395  90.312  0.00  0.00           N  
ATOM   4152  CA  TYR   559     104.717  90.334  89.717  0.00  0.00           C  
ATOM   4153  C   TYR   559     106.196  90.571  89.440  0.00  0.00           C  
ATOM   4154  O   TYR   559     106.936  89.614  89.503  0.00  0.00           O  
ATOM   4155  CB  TYR   559     103.988  89.973  88.440  0.00  0.00           C  
ATOM   4156  CG  TYR   559     102.584  89.432  88.568  0.00  0.00           C  
ATOM   4157  CD1 TYR   559     101.512  90.200  88.095  0.00  0.00           C  
ATOM   4158  CD2 TYR   559     102.327  88.245  89.302  0.00  0.00           C  
ATOM   4159  CE1 TYR   559     100.247  89.686  88.358  0.00  0.00           C  
ATOM   4160  CE2 TYR   559     101.042  87.797  89.622  0.00  0.00           C  
ATOM   4161  CZ  TYR   559      99.992  88.576  89.174  0.00  0.00           C  
ATOM   4162  OH  TYR   559      98.746  88.185  89.442  0.00  0.00           O  
ATOM   4163  N   VAL   560     106.659  91.831  89.421  0.00  0.00           N  
ATOM   4164  CA  VAL   560     108.036  92.140  88.989  0.00  0.00           C  
ATOM   4165  C   VAL   560     109.041  91.679  90.011  0.00  0.00           C  
ATOM   4166  O   VAL   560     108.967  92.103  91.140  0.00  0.00           O  
ATOM   4167  CB  VAL   560     108.184  93.599  88.642  0.00  0.00           C  
ATOM   4168  CG1 VAL   560     109.645  93.889  88.228  0.00  0.00           C  
ATOM   4169  CG2 VAL   560     107.408  93.747  87.313  0.00  0.00           C  
ATOM   4170  N   GLN   561     109.841  90.671  89.628  0.00  0.00           N  
ATOM   4171  CA  GLN   561     111.015  90.261  90.485  0.00  0.00           C  
ATOM   4172  C   GLN   561     112.400  90.693  90.050  0.00  0.00           C  
ATOM   4173  O   GLN   561     113.404  90.565  90.740  0.00  0.00           O  
ATOM   4174  CB  GLN   561     110.968  88.753  90.797  0.00  0.00           C  
ATOM   4175  CG  GLN   561     110.050  88.459  91.951  0.00  0.00           C  
ATOM   4176  CD  GLN   561     110.538  89.076  93.279  0.00  0.00           C  
ATOM   4177  NE2 GLN   561     109.655  89.192  94.262  0.00  0.00           N  
ATOM   4178  OE1 GLN   561     111.673  89.539  93.457  0.00  0.00           O  
ATOM   4179  N   SER   562     112.593  91.271  88.801  0.00  0.00           N  
ATOM   4180  CA  SER   562     113.857  91.780  88.248  0.00  0.00           C  
ATOM   4181  C   SER   562     113.638  92.862  87.179  0.00  0.00           C  
ATOM   4182  O   SER   562     112.524  92.863  86.581  0.00  0.00           O  
ATOM   4183  CB  SER   562     114.687  90.624  87.684  0.00  0.00           C  
ATOM   4184  OG  SER   562     116.067  90.944  87.630  0.00  0.00           O  
ATOM   4185  N   VAL   563     114.591  93.778  87.013  0.00  0.00           N  
ATOM   4186  CA  VAL   563     114.609  94.911  86.026  0.00  0.00           C  
ATOM   4187  C   VAL   563     116.083  95.218  85.741  0.00  0.00           C  
ATOM   4188  O   VAL   563     116.687  96.258  86.024  0.00  0.00           O  
ATOM   4189  CB  VAL   563     113.814  96.172  86.534  0.00  0.00           C  
ATOM   4190  CG1 VAL   563     112.329  96.105  86.382  0.00  0.00           C  
ATOM   4191  CG2 VAL   563     114.163  96.488  87.973  0.00  0.00           C  
ATOM   4192  N   THR   564     116.734  94.288  85.077  0.00  0.00           N  
ATOM   4193  CA  THR   564     118.207  94.278  84.885  0.00  0.00           C  
ATOM   4194  C   THR   564     118.779  95.016  83.710  0.00  0.00           C  
ATOM   4195  O   THR   564     118.946  94.357  82.634  0.00  0.00           O  
ATOM   4196  CB  THR   564     118.930  92.861  84.976  0.00  0.00           C  
ATOM   4197  CG2 THR   564     120.337  93.004  85.653  0.00  0.00           C  
ATOM   4198  OG1 THR   564     118.223  92.001  85.848  0.00  0.00           O  
ATOM   4199  N   VAL   565     119.190  96.267  83.801  0.00  0.00           N  
ATOM   4200  CA  VAL   565     119.934  96.957  82.794  0.00  0.00           C  
ATOM   4201  C   VAL   565     121.246  96.359  82.420  0.00  0.00           C  
ATOM   4202  O   VAL   565     122.155  96.238  83.214  0.00  0.00           O  
ATOM   4203  CB  VAL   565     120.041  98.494  82.833  0.00  0.00           C  
ATOM   4204  CG1 VAL   565     120.405  99.144  81.456  0.00  0.00           C  
ATOM   4205  CG2 VAL   565     118.841  99.181  83.520  0.00  0.00           C  
ATOM   4206  N   ALA   566     121.449  96.081  81.136  0.00  0.00           N  
ATOM   4207  CA  ALA   566     122.660  95.601  80.516  0.00  0.00           C  
ATOM   4208  C   ALA   566     122.794  96.099  79.055  0.00  0.00           C  
ATOM   4209  O   ALA   566     122.127  95.553  78.200  0.00  0.00           O  
ATOM   4210  CB  ALA   566     122.684  94.081  80.465  0.00  0.00           C  
ATOM   4211  N   ASN   567     123.686  97.084  78.768  0.00  0.00           N  
ATOM   4212  CA  ASN   567     123.829  97.629  77.398  0.00  0.00           C  
ATOM   4213  C   ASN   567     122.523  98.018  76.663  0.00  0.00           C  
ATOM   4214  O   ASN   567     122.380  97.708  75.476  0.00  0.00           O  
ATOM   4215  CB  ASN   567     124.717  96.762  76.581  0.00  0.00           C  
ATOM   4216  CG  ASN   567     125.961  96.361  77.278  0.00  0.00           C  
ATOM   4217  ND2 ASN   567     126.464  95.157  77.166  0.00  0.00           N  
ATOM   4218  OD1 ASN   567     126.594  97.199  77.922  0.00  0.00           O  
ATOM   4219  N   GLY   568     121.644  98.681  77.412  0.00  0.00           N  
ATOM   4220  CA  GLY   568     120.318  99.096  76.843  0.00  0.00           C  
ATOM   4221  C   GLY   568     119.237  98.026  76.651  0.00  0.00           C  
ATOM   4222  O   GLY   568     118.112  98.402  76.381  0.00  0.00           O  
ATOM   4223  N   VAL   569     119.594  96.811  76.885  0.00  0.00           N  
ATOM   4224  CA  VAL   569     118.665  95.772  77.235  0.00  0.00           C  
ATOM   4225  C   VAL   569     118.181  95.864  78.676  0.00  0.00           C  
ATOM   4226  O   VAL   569     119.020  96.192  79.498  0.00  0.00           O  
ATOM   4227  CB  VAL   569     119.145  94.394  76.840  0.00  0.00           C  
ATOM   4228  CG1 VAL   569     117.969  93.412  76.810  0.00  0.00           C  
ATOM   4229  CG2 VAL   569     119.671  94.410  75.397  0.00  0.00           C  
ATOM   4230  N   ILE   570     116.954  95.481  78.985  0.00  0.00           N  
ATOM   4231  CA  ILE   570     116.402  95.356  80.329  0.00  0.00           C  
ATOM   4232  C   ILE   570     115.846  93.988  80.453  0.00  0.00           C  
ATOM   4233  O   ILE   570     114.868  93.586  79.812  0.00  0.00           O  
ATOM   4234  CB  ILE   570     115.313  96.387  80.563  0.00  0.00           C  
ATOM   4235  CG1 ILE   570     115.799  97.873  80.486  0.00  0.00           C  
ATOM   4236  CG2 ILE   570     114.569  96.157  81.886  0.00  0.00           C  
ATOM   4237  CD1 ILE   570     114.549  98.780  80.067  0.00  0.00           C  
ATOM   4238  N   THR   571     116.479  93.110  81.268  0.00  0.00           N  
ATOM   4239  CA  THR   571     115.884  91.809  81.597  0.00  0.00           C  
ATOM   4240  C   THR   571     114.957  91.835  82.872  0.00  0.00           C  
ATOM   4241  O   THR   571     115.265  92.178  83.967  0.00  0.00           O  
ATOM   4242  CB  THR   571     116.936  90.679  81.621  0.00  0.00           C  
ATOM   4243  CG2 THR   571     116.356  89.228  81.393  0.00  0.00           C  
ATOM   4244  OG1 THR   571     117.939  90.761  80.656  0.00  0.00           O  
ATOM   4245  N   ALA   572     113.702  91.416  82.556  0.00  0.00           N  
ATOM   4246  CA  ALA   572     112.587  91.331  83.539  0.00  0.00           C  
ATOM   4247  C   ALA   572     112.513  89.876  84.068  0.00  0.00           C  
ATOM   4248  O   ALA   572     112.807  88.918  83.364  0.00  0.00           O  
ATOM   4249  CB  ALA   572     111.273  91.772  83.025  0.00  0.00           C  
ATOM   4250  N   GLN   573     112.099  89.695  85.323  0.00  0.00           N  
ATOM   4251  CA  GLN   573     111.671  88.374  85.858  0.00  0.00           C  
ATOM   4252  C   GLN   573     110.273  88.298  86.544  0.00  0.00           C  
ATOM   4253  O   GLN   573     109.902  89.263  87.134  0.00  0.00           O  
ATOM   4254  CB  GLN   573     112.825  87.769  86.747  0.00  0.00           C  
ATOM   4255  CG  GLN   573     112.609  86.344  87.127  0.00  0.00           C  
ATOM   4256  CD  GLN   573     113.916  85.718  87.704  0.00  0.00           C  
ATOM   4257  NE2 GLN   573     113.961  84.434  88.074  0.00  0.00           N  
ATOM   4258  OE1 GLN   573     114.923  86.431  87.871  0.00  0.00           O  
ATOM   4259  N   MET   574     109.606  87.133  86.498  0.00  0.00           N  
ATOM   4260  CA  MET   574     108.336  86.797  87.165  0.00  0.00           C  
ATOM   4261  C   MET   574     108.489  86.498  88.624  0.00  0.00           C  
ATOM   4262  O   MET   574     109.533  86.043  89.092  0.00  0.00           O  
ATOM   4263  CB  MET   574     107.595  85.684  86.372  0.00  0.00           C  
ATOM   4264  CG  MET   574     107.169  86.066  84.909  0.00  0.00           C  
ATOM   4265  SD  MET   574     106.315  87.655  84.532  0.00  0.00           S  
ATOM   4266  CE  MET   574     104.687  87.245  85.180  0.00  0.00           C  
ATOM   4267  N   ALA   575     107.381  86.698  89.359  0.00  0.00           N  
ATOM   4268  CA  ALA   575     107.236  86.268  90.744  0.00  0.00           C  
ATOM   4269  C   ALA   575     107.372  84.715  90.902  0.00  0.00           C  
ATOM   4270  O   ALA   575     107.191  83.906  89.955  0.00  0.00           O  
ATOM   4271  CB  ALA   575     105.993  86.911  91.422  0.00  0.00           C  
ATOM   4272  N   SER   576     107.659  84.219  92.120  0.00  0.00           N  
ATOM   4273  CA  SER   576     107.695  82.783  92.502  0.00  0.00           C  
ATOM   4274  C   SER   576     106.424  82.295  93.208  0.00  0.00           C  
ATOM   4275  O   SER   576     106.191  81.120  93.552  0.00  0.00           O  
ATOM   4276  CB  SER   576     108.803  82.640  93.531  0.00  0.00           C  
ATOM   4277  OG  SER   576     108.587  83.425  94.739  0.00  0.00           O  
ATOM   4278  N   SER   577     105.441  83.208  93.438  0.00  0.00           N  
ATOM   4279  CA  SER   577     104.222  82.951  94.122  0.00  0.00           C  
ATOM   4280  C   SER   577     103.091  83.708  93.465  0.00  0.00           C  
ATOM   4281  O   SER   577     103.424  84.722  92.812  0.00  0.00           O  
ATOM   4282  CB  SER   577     104.260  83.156  95.627  0.00  0.00           C  
ATOM   4283  OG  SER   577     104.146  84.588  95.979  0.00  0.00           O  
ATOM   4284  N   ASN   578     101.834  83.359  93.706  0.00  0.00           N  
ATOM   4285  CA  ASN   578     100.631  84.156  93.319  0.00  0.00           C  
ATOM   4286  C   ASN   578     100.436  84.321  91.773  0.00  0.00           C  
ATOM   4287  O   ASN   578      99.655  84.960  91.162  0.00  0.00           O  
ATOM   4288  CB  ASN   578     100.535  85.460  94.119  0.00  0.00           C  
ATOM   4289  CG  ASN   578     100.527  85.181  95.585  0.00  0.00           C  
ATOM   4290  ND2 ASN   578      99.391  84.885  96.129  0.00  0.00           N  
ATOM   4291  OD1 ASN   578     101.540  85.177  96.230  0.00  0.00           O  
ATOM   4292  N   VAL   579     101.175  83.507  91.039  0.00  0.00           N  
ATOM   4293  CA  VAL   579     101.314  83.518  89.554  0.00  0.00           C  
ATOM   4294  C   VAL   579     101.149  82.127  88.852  0.00  0.00           C  
ATOM   4295  O   VAL   579     101.628  81.201  89.370  0.00  0.00           O  
ATOM   4296  CB  VAL   579     102.591  84.321  89.019  0.00  0.00           C  
ATOM   4297  CG1 VAL   579     103.810  83.483  89.255  0.00  0.00           C  
ATOM   4298  CG2 VAL   579     102.466  84.758  87.556  0.00  0.00           C  
ATOM   4299  N   ASN   580     100.594  81.978  87.651  0.00  0.00           N  
ATOM   4300  CA  ASN   580     100.535  80.668  86.973  0.00  0.00           C  
ATOM   4301  C   ASN   580     101.842  79.948  86.895  0.00  0.00           C  
ATOM   4302  O   ASN   580     102.817  80.536  86.572  0.00  0.00           O  
ATOM   4303  CB  ASN   580      99.733  80.736  85.635  0.00  0.00           C  
ATOM   4304  CG  ASN   580      99.846  79.454  84.848  0.00  0.00           C  
ATOM   4305  ND2 ASN   580      99.883  79.471  83.553  0.00  0.00           N  
ATOM   4306  OD1 ASN   580      99.764  78.323  85.303  0.00  0.00           O  
ATOM   4307  N   ASN   581     101.837  78.611  87.121  0.00  0.00           N  
ATOM   4308  CA  ASN   581     103.022  77.767  87.214  0.00  0.00           C  
ATOM   4309  C   ASN   581     103.787  77.651  85.884  0.00  0.00           C  
ATOM   4310  O   ASN   581     104.999  77.402  85.776  0.00  0.00           O  
ATOM   4311  CB  ASN   581     102.614  76.389  87.724  0.00  0.00           C  
ATOM   4312  CG  ASN   581     102.223  76.507  89.142  0.00  0.00           C  
ATOM   4313  ND2 ASN   581     101.528  75.488  89.629  0.00  0.00           N  
ATOM   4314  OD1 ASN   581     102.530  77.356  89.921  0.00  0.00           O  
ATOM   4315  N   GLU   582     103.154  77.834  84.709  0.00  0.00           N  
ATOM   4316  CA  GLU   582     103.835  77.902  83.455  0.00  0.00           C  
ATOM   4317  C   GLU   582     104.841  79.057  83.412  0.00  0.00           C  
ATOM   4318  O   GLU   582     105.961  78.973  82.880  0.00  0.00           O  
ATOM   4319  CB  GLU   582     102.750  78.170  82.337  0.00  0.00           C  
ATOM   4320  CG  GLU   582     101.838  76.926  82.189  0.00  0.00           C  
ATOM   4321  CD  GLU   582     102.483  75.754  81.429  0.00  0.00           C  
ATOM   4322  OE1 GLU   582     103.622  75.831  80.994  0.00  0.00           O  
ATOM   4323  OE2 GLU   582     101.819  74.694  81.369  0.00  0.00           O1-
ATOM   4324  N   ILE   583     104.425  80.219  83.941  0.00  0.00           N  
ATOM   4325  CA  ILE   583     105.167  81.473  83.946  0.00  0.00           C  
ATOM   4326  C   ILE   583     105.899  81.819  85.201  0.00  0.00           C  
ATOM   4327  O   ILE   583     106.664  82.771  85.281  0.00  0.00           O  
ATOM   4328  CB  ILE   583     104.372  82.735  83.376  0.00  0.00           C  
ATOM   4329  CG1 ILE   583     103.161  82.963  84.388  0.00  0.00           C  
ATOM   4330  CG2 ILE   583     103.884  82.494  81.973  0.00  0.00           C  
ATOM   4331  CD1 ILE   583     102.157  84.055  83.998  0.00  0.00           C  
ATOM   4332  N   LYS   584     105.686  81.093  86.351  0.00  0.00           N  
ATOM   4333  CA  LYS   584     106.346  81.199  87.604  0.00  0.00           C  
ATOM   4334  C   LYS   584     107.872  81.185  87.499  0.00  0.00           C  
ATOM   4335  O   LYS   584     108.361  80.184  87.072  0.00  0.00           O  
ATOM   4336  CB  LYS   584     105.747  80.164  88.518  0.00  0.00           C  
ATOM   4337  CG  LYS   584     106.255  80.259  89.990  0.00  0.00           C  
ATOM   4338  CD  LYS   584     105.335  79.516  91.010  0.00  0.00           C  
ATOM   4339  CE  LYS   584     104.066  80.353  91.337  0.00  0.00           C  
ATOM   4340  NZ  LYS   584     102.992  79.464  91.823  0.00  0.00           N1+
ATOM   4341  N   SER   585     108.537  82.257  87.995  0.00  0.00           N  
ATOM   4342  CA  SER   585     110.003  82.541  88.032  0.00  0.00           C  
ATOM   4343  C   SER   585     110.696  82.949  86.709  0.00  0.00           C  
ATOM   4344  O   SER   585     111.900  83.224  86.662  0.00  0.00           O  
ATOM   4345  CB  SER   585     110.770  81.402  88.787  0.00  0.00           C  
ATOM   4346  OG  SER   585     110.452  81.319  90.146  0.00  0.00           O  
ATOM   4347  N   LYS   586     109.935  82.873  85.597  0.00  0.00           N  
ATOM   4348  CA  LYS   586     110.486  83.063  84.225  0.00  0.00           C  
ATOM   4349  C   LYS   586     110.970  84.526  83.915  0.00  0.00           C  
ATOM   4350  O   LYS   586     110.622  85.489  84.534  0.00  0.00           O  
ATOM   4351  CB  LYS   586     109.477  82.538  83.265  0.00  0.00           C  
ATOM   4352  CG  LYS   586     109.626  81.081  82.950  0.00  0.00           C  
ATOM   4353  CD  LYS   586     109.256  80.118  84.081  0.00  0.00           C  
ATOM   4354  CE  LYS   586     108.967  78.606  83.622  0.00  0.00           C  
ATOM   4355  NZ  LYS   586     108.292  77.767  84.622  0.00  0.00           N1+
ATOM   4356  N   LYS   587     111.698  84.650  82.764  0.00  0.00           N  
ATOM   4357  CA  LYS   587     112.410  85.822  82.345  0.00  0.00           C  
ATOM   4358  C   LYS   587     111.944  86.246  80.878  0.00  0.00           C  
ATOM   4359  O   LYS   587     111.647  85.361  80.035  0.00  0.00           O  
ATOM   4360  CB  LYS   587     113.911  85.685  82.275  0.00  0.00           C  
ATOM   4361  CG  LYS   587     114.431  85.481  83.747  0.00  0.00           C  
ATOM   4362  CD  LYS   587     115.928  85.202  83.738  0.00  0.00           C  
ATOM   4363  CE  LYS   587     116.318  84.758  85.241  0.00  0.00           C  
ATOM   4364  NZ  LYS   587     117.580  83.906  85.243  0.00  0.00           N1+
ATOM   4365  N   LEU   588     111.920  87.554  80.672  0.00  0.00           N  
ATOM   4366  CA  LEU   588     111.886  88.242  79.355  0.00  0.00           C  
ATOM   4367  C   LEU   588     112.939  89.401  79.283  0.00  0.00           C  
ATOM   4368  O   LEU   588     113.489  89.780  80.287  0.00  0.00           O  
ATOM   4369  CB  LEU   588     110.442  88.655  79.194  0.00  0.00           C  
ATOM   4370  CG  LEU   588     109.338  87.558  78.986  0.00  0.00           C  
ATOM   4371  CD1 LEU   588     107.945  88.122  79.030  0.00  0.00           C  
ATOM   4372  CD2 LEU   588     109.436  86.807  77.608  0.00  0.00           C  
ATOM   4373  N   SER   589     112.873  90.112  78.156  0.00  0.00           N  
ATOM   4374  CA  SER   589     113.730  91.256  77.880  0.00  0.00           C  
ATOM   4375  C   SER   589     112.985  92.399  77.117  0.00  0.00           C  
ATOM   4376  O   SER   589     112.302  92.102  76.151  0.00  0.00           O  
ATOM   4377  CB  SER   589     115.070  90.810  77.255  0.00  0.00           C  
ATOM   4378  OG  SER   589     115.947  89.904  77.970  0.00  0.00           O  
ATOM   4379  N   LEU   590     113.315  93.625  77.427  0.00  0.00           N  
ATOM   4380  CA  LEU   590     113.008  94.845  76.625  0.00  0.00           C  
ATOM   4381  C   LEU   590     114.314  95.360  75.944  0.00  0.00           C  
ATOM   4382  O   LEU   590     115.328  95.463  76.687  0.00  0.00           O  
ATOM   4383  CB  LEU   590     112.411  95.953  77.548  0.00  0.00           C  
ATOM   4384  CG  LEU   590     111.591  95.487  78.730  0.00  0.00           C  
ATOM   4385  CD1 LEU   590     111.311  96.657  79.660  0.00  0.00           C  
ATOM   4386  CD2 LEU   590     110.212  94.842  78.315  0.00  0.00           C  
ATOM   4387  N   TRP   591     114.347  95.526  74.638  0.00  0.00           N  
ATOM   4388  CA  TRP   591     115.521  96.161  73.883  0.00  0.00           C  
ATOM   4389  C   TRP   591     115.094  97.198  72.840  0.00  0.00           C  
ATOM   4390  O   TRP   591     113.913  97.413  72.507  0.00  0.00           O  
ATOM   4391  CB  TRP   591     116.430  95.133  73.225  0.00  0.00           C  
ATOM   4392  CG  TRP   591     115.763  94.286  72.173  0.00  0.00           C  
ATOM   4393  CD1 TRP   591     115.724  94.598  70.881  0.00  0.00           C  
ATOM   4394  CD2 TRP   591     114.913  93.130  72.338  0.00  0.00           C  
ATOM   4395  CE2 TRP   591     114.485  92.718  71.029  0.00  0.00           C  
ATOM   4396  CE3 TRP   591     114.464  92.462  73.487  0.00  0.00           C  
ATOM   4397  NE1 TRP   591     114.893  93.726  70.218  0.00  0.00           N  
ATOM   4398  CZ2 TRP   591     113.658  91.621  70.913  0.00  0.00           C  
ATOM   4399  CZ3 TRP   591     113.739  91.260  73.402  0.00  0.00           C  
ATOM   4400  CH2 TRP   591     113.347  90.896  72.083  0.00  0.00           C  
ATOM   4401  N   ALA   592     115.995  97.972  72.230  0.00  0.00           N  
ATOM   4402  CA  ALA   592     115.794  98.991  71.258  0.00  0.00           C  
ATOM   4403  C   ALA   592     116.835  99.015  70.207  0.00  0.00           C  
ATOM   4404  O   ALA   592     117.895  98.408  70.388  0.00  0.00           O  
ATOM   4405  CB  ALA   592     115.537 100.293  71.954  0.00  0.00           C  
ATOM   4406  N   LYS   593     116.477  99.556  69.004  0.00  0.00           N  
ATOM   4407  CA  LYS   593     117.378  99.662  67.848  0.00  0.00           C  
ATOM   4408  C   LYS   593     116.925 100.919  67.006  0.00  0.00           C  
ATOM   4409  O   LYS   593     115.729 101.277  66.870  0.00  0.00           O  
ATOM   4410  CB  LYS   593     117.468  98.334  67.031  0.00  0.00           C  
ATOM   4411  CG  LYS   593     117.989  98.271  65.574  0.00  0.00           C  
ATOM   4412  CD  LYS   593     118.023  96.766  65.193  0.00  0.00           C  
ATOM   4413  CE  LYS   593     118.304  96.629  63.684  0.00  0.00           C  
ATOM   4414  NZ  LYS   593     118.394  95.159  63.414  0.00  0.00           N1+
ATOM   4415  N   ARG   594     117.854 101.643  66.480  0.00  0.00           N  
ATOM   4416  CA  ARG   594     117.635 102.818  65.571  0.00  0.00           C  
ATOM   4417  C   ARG   594     117.190 102.364  64.158  0.00  0.00           C  
ATOM   4418  O   ARG   594     117.727 101.378  63.555  0.00  0.00           O  
ATOM   4419  CB  ARG   594     118.811 103.716  65.633  0.00  0.00           C  
ATOM   4420  CG  ARG   594     118.769 104.871  64.638  0.00  0.00           C  
ATOM   4421  CD  ARG   594     119.802 105.918  64.917  0.00  0.00           C  
ATOM   4422  NE  ARG   594     119.741 107.076  63.994  0.00  0.00           N  
ATOM   4423  CZ  ARG   594     120.654 107.545  63.188  0.00  0.00           C  
ATOM   4424  NH1 ARG   594     121.902 107.181  63.146  0.00  0.00           N1+
ATOM   4425  NH2 ARG   594     120.387 108.509  62.309  0.00  0.00           N  
ATOM   4426  N   GLN   595     116.282 103.095  63.615  0.00  0.00           N  
ATOM   4427  CA  GLN   595     115.694 102.905  62.272  0.00  0.00           C  
ATOM   4428  C   GLN   595     115.641 104.255  61.491  0.00  0.00           C  
ATOM   4429  O   GLN   595     116.400 105.185  61.766  0.00  0.00           O  
ATOM   4430  CB  GLN   595     114.268 102.303  62.383  0.00  0.00           C  
ATOM   4431  CG  GLN   595     114.240 100.781  62.795  0.00  0.00           C  
ATOM   4432  CD  GLN   595     115.129  99.937  61.882  0.00  0.00           C  
ATOM   4433  NE2 GLN   595     115.300  98.701  62.276  0.00  0.00           N  
ATOM   4434  OE1 GLN   595     115.743 100.360  60.868  0.00  0.00           O  
ATOM   4435  N   ASN   596     114.764 104.394  60.453  0.00  0.00           N  
ATOM   4436  CA  ASN   596     114.306 105.724  60.023  0.00  0.00           C  
ATOM   4437  C   ASN   596     113.654 106.560  61.156  0.00  0.00           C  
ATOM   4438  O   ASN   596     113.579 107.767  61.069  0.00  0.00           O  
ATOM   4439  CB  ASN   596     113.386 105.656  58.850  0.00  0.00           C  
ATOM   4440  CG  ASN   596     113.366 104.451  57.961  0.00  0.00           C  
ATOM   4441  ND2 ASN   596     113.148 104.741  56.692  0.00  0.00           N  
ATOM   4442  OD1 ASN   596     113.466 103.240  58.184  0.00  0.00           O  
ATOM   4443  N   GLY   597     113.234 105.974  62.315  0.00  0.00           N  
ATOM   4444  CA  GLY   597     112.871 106.602  63.594  0.00  0.00           C  
ATOM   4445  C   GLY   597     114.059 106.511  64.538  0.00  0.00           C  
ATOM   4446  O   GLY   597     114.645 105.389  64.680  0.00  0.00           O  
ATOM   4447  N   SER   598     114.349 107.623  65.232  0.00  0.00           N  
ATOM   4448  CA  SER   598     115.589 107.777  66.073  0.00  0.00           C  
ATOM   4449  C   SER   598     115.924 106.639  67.002  0.00  0.00           C  
ATOM   4450  O   SER   598     117.053 106.206  67.146  0.00  0.00           O  
ATOM   4451  CB  SER   598     115.482 109.060  66.886  0.00  0.00           C  
ATOM   4452  OG  SER   598     115.152 110.173  66.115  0.00  0.00           O  
ATOM   4453  N   VAL   599     114.953 106.133  67.694  0.00  0.00           N  
ATOM   4454  CA  VAL   599     114.930 104.783  68.225  0.00  0.00           C  
ATOM   4455  C   VAL   599     113.603 103.973  68.163  0.00  0.00           C  
ATOM   4456  O   VAL   599     112.522 104.543  68.307  0.00  0.00           O  
ATOM   4457  CB  VAL   599     115.637 104.631  69.592  0.00  0.00           C  
ATOM   4458  CG1 VAL   599     114.681 104.718  70.734  0.00  0.00           C  
ATOM   4459  CG2 VAL   599     116.405 103.326  69.631  0.00  0.00           C  
ATOM   4460  N   LYS   600     113.563 102.590  67.895  0.00  0.00           N  
ATOM   4461  CA  LYS   600     112.361 101.687  68.018  0.00  0.00           C  
ATOM   4462  C   LYS   600     112.588 100.678  69.169  0.00  0.00           C  
ATOM   4463  O   LYS   600     113.615 100.047  69.258  0.00  0.00           O  
ATOM   4464  CB  LYS   600     112.111 100.974  66.650  0.00  0.00           C  
ATOM   4465  CG  LYS   600     110.999  99.893  66.601  0.00  0.00           C  
ATOM   4466  CD  LYS   600     111.003  99.277  65.217  0.00  0.00           C  
ATOM   4467  CE  LYS   600     110.017  98.123  65.277  0.00  0.00           C  
ATOM   4468  NZ  LYS   600     110.176  97.336  64.074  0.00  0.00           N1+
ATOM   4469  N   TRP   601     111.593 100.616  70.060  0.00  0.00           N  
ATOM   4470  CA  TRP   601     111.504  99.688  71.183  0.00  0.00           C  
ATOM   4471  C   TRP   601     110.871  98.318  70.846  0.00  0.00           C  
ATOM   4472  O   TRP   601     110.097  98.227  69.897  0.00  0.00           O  
ATOM   4473  CB  TRP   601     110.894 100.229  72.568  0.00  0.00           C  
ATOM   4474  CG  TRP   601     111.894 100.946  73.479  0.00  0.00           C  
ATOM   4475  CD1 TRP   601     112.225 102.267  73.241  0.00  0.00           C  
ATOM   4476  CD2 TRP   601     112.852 100.531  74.553  0.00  0.00           C  
ATOM   4477  CE2 TRP   601     113.584 101.662  74.995  0.00  0.00           C  
ATOM   4478  CE3 TRP   601     113.157  99.317  75.096  0.00  0.00           C  
ATOM   4479  NE1 TRP   601     113.167 102.653  74.138  0.00  0.00           N  
ATOM   4480  CZ2 TRP   601     114.538 101.620  76.036  0.00  0.00           C  
ATOM   4481  CZ3 TRP   601     114.157  99.196  76.045  0.00  0.00           C  
ATOM   4482  CH2 TRP   601     114.804 100.343  76.504  0.00  0.00           C  
ATOM   4483  N   PHE   602     111.306  97.280  71.556  0.00  0.00           N  
ATOM   4484  CA  PHE   602     110.948  95.878  71.469  0.00  0.00           C  
ATOM   4485  C   PHE   602     110.650  95.257  72.743  0.00  0.00           C  
ATOM   4486  O   PHE   602     111.281  95.609  73.715  0.00  0.00           O  
ATOM   4487  CB  PHE   602     111.978  95.129  70.588  0.00  0.00           C  
ATOM   4488  CG  PHE   602     112.270  95.690  69.167  0.00  0.00           C  
ATOM   4489  CD1 PHE   602     113.160  96.778  69.027  0.00  0.00           C  
ATOM   4490  CD2 PHE   602     111.609  95.088  68.082  0.00  0.00           C  
ATOM   4491  CE1 PHE   602     113.457  97.228  67.708  0.00  0.00           C  
ATOM   4492  CE2 PHE   602     111.919  95.530  66.792  0.00  0.00           C  
ATOM   4493  CZ  PHE   602     112.841  96.561  66.659  0.00  0.00           C  
ATOM   4494  N   CYS   603     109.788  94.230  72.794  0.00  0.00           N  
ATOM   4495  CA  CYS   603     109.409  93.506  74.012  0.00  0.00           C  
ATOM   4496  C   CYS   603     109.219  92.052  73.706  0.00  0.00           C  
ATOM   4497  O   CYS   603     108.244  91.666  73.065  0.00  0.00           O  
ATOM   4498  CB  CYS   603     108.136  94.180  74.608  0.00  0.00           C  
ATOM   4499  SG  CYS   603     108.499  95.821  75.276  0.00  0.00           S  
ATOM   4500  N   GLY   604     110.116  91.109  74.188  0.00  0.00           N  
ATOM   4501  CA  GLY   604     110.123  89.684  73.891  0.00  0.00           C  
ATOM   4502  C   GLY   604     111.125  88.838  74.609  0.00  0.00           C  
ATOM   4503  O   GLY   604     111.343  89.032  75.804  0.00  0.00           O  
ATOM   4504  N   GLN   605     111.564  87.787  73.917  0.00  0.00           N  
ATOM   4505  CA  GLN   605     112.219  86.678  74.518  0.00  0.00           C  
ATOM   4506  C   GLN   605     113.516  87.030  75.345  0.00  0.00           C  
ATOM   4507  O   GLN   605     113.972  88.177  75.295  0.00  0.00           O  
ATOM   4508  CB  GLN   605     112.469  85.619  73.406  0.00  0.00           C  
ATOM   4509  CG  GLN   605     113.705  86.014  72.574  0.00  0.00           C  
ATOM   4510  CD  GLN   605     114.263  84.866  71.662  0.00  0.00           C  
ATOM   4511  NE2 GLN   605     115.344  85.071  70.967  0.00  0.00           N  
ATOM   4512  OE1 GLN   605     113.716  83.754  71.571  0.00  0.00           O  
ATOM   4513  N   PRO   606     114.085  86.119  76.147  0.00  0.00           N  
ATOM   4514  CA  PRO   606     115.360  86.276  76.744  0.00  0.00           C  
ATOM   4515  C   PRO   606     116.501  86.683  75.715  0.00  0.00           C  
ATOM   4516  O   PRO   606     117.014  85.909  74.914  0.00  0.00           O  
ATOM   4517  CB  PRO   606     115.670  85.000  77.521  0.00  0.00           C  
ATOM   4518  CG  PRO   606     114.252  84.625  77.993  0.00  0.00           C  
ATOM   4519  CD  PRO   606     113.417  84.940  76.787  0.00  0.00           C  
ATOM   4520  N   VAL   607     116.938  87.942  75.804  0.00  0.00           N  
ATOM   4521  CA  VAL   607     118.102  88.498  75.030  0.00  0.00           C  
ATOM   4522  C   VAL   607     118.915  89.380  75.959  0.00  0.00           C  
ATOM   4523  O   VAL   607     118.497  89.951  76.966  0.00  0.00           O  
ATOM   4524  CB  VAL   607     117.627  89.132  73.644  0.00  0.00           C  
ATOM   4525  CG1 VAL   607     116.604  88.338  72.883  0.00  0.00           C  
ATOM   4526  CG2 VAL   607     117.046  90.459  73.747  0.00  0.00           C  
ATOM   4527  N   THR   608     120.151  89.590  75.481  0.00  0.00           N  
ATOM   4528  CA  THR   608     121.105  90.611  75.878  0.00  0.00           C  
ATOM   4529  C   THR   608     122.148  90.894  74.813  0.00  0.00           C  
ATOM   4530  O   THR   608     122.599  90.107  73.964  0.00  0.00           O  
ATOM   4531  CB  THR   608     121.784  90.277  77.208  0.00  0.00           C  
ATOM   4532  CG2 THR   608     122.933  89.261  77.070  0.00  0.00           C  
ATOM   4533  OG1 THR   608     122.466  91.452  77.629  0.00  0.00           O  
ATOM   4534  N   ARG   609     122.569  92.144  74.893  0.00  0.00           N  
ATOM   4535  CA  ARG   609     123.483  92.860  74.009  0.00  0.00           C  
ATOM   4536  C   ARG   609     124.992  92.722  74.468  0.00  0.00           C  
ATOM   4537  O   ARG   609     125.332  93.021  75.593  0.00  0.00           O  
ATOM   4538  CB  ARG   609     123.040  94.336  73.762  0.00  0.00           C  
ATOM   4539  CG  ARG   609     123.989  95.108  72.748  0.00  0.00           C  
ATOM   4540  CD  ARG   609     123.619  96.477  72.439  0.00  0.00           C  
ATOM   4541  NE  ARG   609     122.482  96.545  71.519  0.00  0.00           N  
ATOM   4542  CZ  ARG   609     121.291  97.126  71.787  0.00  0.00           C  
ATOM   4543  NH1 ARG   609     120.980  97.531  73.001  0.00  0.00           N1+
ATOM   4544  NH2 ARG   609     120.425  97.351  70.792  0.00  0.00           N  
ATOM   4545  N   THR   610     125.899  92.553  73.537  0.00  0.00           N  
ATOM   4546  CA  THR   610     127.343  92.268  73.745  0.00  0.00           C  
ATOM   4547  C   THR   610     128.147  93.374  74.423  0.00  0.00           C  
ATOM   4548  O   THR   610     129.032  93.106  75.274  0.00  0.00           O  
ATOM   4549  CB  THR   610     128.092  91.753  72.406  0.00  0.00           C  
ATOM   4550  CG2 THR   610     129.242  90.808  72.675  0.00  0.00           C  
ATOM   4551  OG1 THR   610     127.279  91.078  71.424  0.00  0.00           O  
ATOM   4552  N   THR   611     127.931  94.622  73.996  0.00  0.00           N  
ATOM   4553  CA  THR   611     128.713  95.783  74.383  0.00  0.00           C  
ATOM   4554  C   THR   611     127.840  97.057  74.061  0.00  0.00           C  
ATOM   4555  O   THR   611     127.034  96.981  73.149  0.00  0.00           O  
ATOM   4556  CB  THR   611     130.014  95.873  73.578  0.00  0.00           C  
ATOM   4557  CG2 THR   611     129.970  95.756  72.039  0.00  0.00           C  
ATOM   4558  OG1 THR   611     130.462  97.189  73.785  0.00  0.00           O  
ATOM   4559  N   ALA   612     127.997  98.065  74.877  0.00  0.00           N  
ATOM   4560  CA  ALA   612     127.348  99.363  74.789  0.00  0.00           C  
ATOM   4561  C   ALA   612     127.528 100.126  73.385  0.00  0.00           C  
ATOM   4562  O   ALA   612     126.752 100.976  73.017  0.00  0.00           O  
ATOM   4563  CB  ALA   612     127.951 100.262  75.849  0.00  0.00           C  
ATOM   4564  N   THR   613     128.513  99.726  72.584  0.00  0.00           N  
ATOM   4565  CA  THR   613     128.846 100.183  71.198  0.00  0.00           C  
ATOM   4566  C   THR   613     128.065  99.426  70.086  0.00  0.00           C  
ATOM   4567  O   THR   613     128.149  99.936  68.952  0.00  0.00           O  
ATOM   4568  CB  THR   613     130.320 100.215  70.885  0.00  0.00           C  
ATOM   4569  CG2 THR   613     131.174 100.819  71.981  0.00  0.00           C  
ATOM   4570  OG1 THR   613     130.881  98.931  70.706  0.00  0.00           O  
ATOM   4571  N   ALA   614     127.420  98.283  70.308  0.00  0.00           N  
ATOM   4572  CA  ALA   614     126.788  97.422  69.308  0.00  0.00           C  
ATOM   4573  C   ALA   614     125.306  97.899  68.962  0.00  0.00           C  
ATOM   4574  O   ALA   614     124.566  98.321  69.824  0.00  0.00           O  
ATOM   4575  CB  ALA   614     126.760  95.990  69.864  0.00  0.00           C  
ATOM   4576  N   THR   615     124.892  97.678  67.730  0.00  0.00           N  
ATOM   4577  CA  THR   615     123.530  97.873  67.216  0.00  0.00           C  
ATOM   4578  C   THR   615     122.590  96.752  67.592  0.00  0.00           C  
ATOM   4579  O   THR   615     121.663  96.914  68.402  0.00  0.00           O  
ATOM   4580  CB  THR   615     123.716  97.920  65.676  0.00  0.00           C  
ATOM   4581  CG2 THR   615     124.269  99.159  65.011  0.00  0.00           C  
ATOM   4582  OG1 THR   615     124.613  96.875  65.300  0.00  0.00           O  
ATOM   4583  N   ASP   616     122.798  95.546  67.061  0.00  0.00           N  
ATOM   4584  CA  ASP   616     121.931  94.342  67.359  0.00  0.00           C  
ATOM   4585  C   ASP   616     121.934  93.654  68.701  0.00  0.00           C  
ATOM   4586  O   ASP   616     122.665  94.133  69.608  0.00  0.00           O  
ATOM   4587  CB  ASP   616     122.256  93.456  66.227  0.00  0.00           C  
ATOM   4588  CG  ASP   616     121.529  93.945  65.014  0.00  0.00           C  
ATOM   4589  OD1 ASP   616     120.255  94.012  64.974  0.00  0.00           O  
ATOM   4590  OD2 ASP   616     122.234  94.076  63.993  0.00  0.00           O1-
ATOM   4591  N   VAL   617     121.074  92.677  68.883  0.00  0.00           N  
ATOM   4592  CA  VAL   617     120.992  91.972  70.155  0.00  0.00           C  
ATOM   4593  C   VAL   617     121.149  90.459  70.021  0.00  0.00           C  
ATOM   4594  O   VAL   617     120.729  89.840  68.998  0.00  0.00           O  
ATOM   4595  CB  VAL   617     119.718  92.341  70.907  0.00  0.00           C  
ATOM   4596  CG1 VAL   617     119.792  92.076  72.416  0.00  0.00           C  
ATOM   4597  CG2 VAL   617     119.371  93.804  70.851  0.00  0.00           C  
ATOM   4598  N   ALA   618     121.800  89.799  70.978  0.00  0.00           N  
ATOM   4599  CA  ALA   618     121.989  88.344  70.964  0.00  0.00           C  
ATOM   4600  C   ALA   618     121.031  87.587  71.888  0.00  0.00           C  
ATOM   4601  O   ALA   618     120.728  88.024  72.987  0.00  0.00           O  
ATOM   4602  CB  ALA   618     123.420  88.066  71.395  0.00  0.00           C  
ATOM   4603  N   ALA   619     120.604  86.382  71.456  0.00  0.00           N  
ATOM   4604  CA  ALA   619     119.617  85.520  72.095  0.00  0.00           C  
ATOM   4605  C   ALA   619     120.275  84.851  73.314  0.00  0.00           C  
ATOM   4606  O   ALA   619     121.395  84.380  73.187  0.00  0.00           O  
ATOM   4607  CB  ALA   619     119.102  84.427  71.089  0.00  0.00           C  
ATOM   4608  N   ALA   620     119.473  84.602  74.364  0.00  0.00           N  
ATOM   4609  CA  ALA   620     119.806  84.110  75.722  0.00  0.00           C  
ATOM   4610  C   ALA   620     118.691  83.193  76.419  0.00  0.00           C  
ATOM   4611  O   ALA   620     118.386  83.235  77.559  0.00  0.00           O  
ATOM   4612  CB  ALA   620     120.203  85.294  76.600  0.00  0.00           C  
ATOM   4613  N   ASN   621     118.120  82.321  75.627  0.00  0.00           N  
ATOM   4614  CA  ASN   621     116.991  81.371  75.926  0.00  0.00           C  
ATOM   4615  C   ASN   621     117.167  80.408  77.085  0.00  0.00           C  
ATOM   4616  O   ASN   621     116.298  79.558  77.297  0.00  0.00           O  
ATOM   4617  CB  ASN   621     116.606  80.727  74.571  0.00  0.00           C  
ATOM   4618  CG  ASN   621     115.753  81.649  73.667  0.00  0.00           C  
ATOM   4619  ND2 ASN   621     116.062  81.741  72.412  0.00  0.00           N  
ATOM   4620  OD1 ASN   621     114.848  82.325  74.134  0.00  0.00           O  
ATOM   4621  N   GLY   622     118.361  80.390  77.828  0.00  0.00           N  
ATOM   4622  CA  GLY   622     118.486  79.927  79.219  0.00  0.00           C  
ATOM   4623  C   GLY   622     118.092  78.441  79.416  0.00  0.00           C  
ATOM   4624  O   GLY   622     117.391  78.161  80.387  0.00  0.00           O  
ATOM   4625  N   LYS   623     118.501  77.465  78.512  0.00  0.00           N  
ATOM   4626  CA  LYS   623     118.065  76.066  78.412  0.00  0.00           C  
ATOM   4627  C   LYS   623     116.564  75.760  78.443  0.00  0.00           C  
ATOM   4628  O   LYS   623     116.089  74.745  78.993  0.00  0.00           O  
ATOM   4629  CB  LYS   623     118.800  75.101  79.344  0.00  0.00           C  
ATOM   4630  CG  LYS   623     120.359  75.164  79.257  0.00  0.00           C  
ATOM   4631  CD  LYS   623     121.084  74.169  80.144  0.00  0.00           C  
ATOM   4632  CE  LYS   623     122.570  74.610  80.102  0.00  0.00           C  
ATOM   4633  NZ  LYS   623     123.379  73.693  80.923  0.00  0.00           N1+
ATOM   4634  N   THR   624     115.795  76.738  78.039  0.00  0.00           N  
ATOM   4635  CA  THR   624     114.281  76.691  78.270  0.00  0.00           C  
ATOM   4636  C   THR   624     113.798  76.728  79.743  0.00  0.00           C  
ATOM   4637  O   THR   624     112.639  76.940  80.044  0.00  0.00           O  
ATOM   4638  CB  THR   624     113.451  75.786  77.305  0.00  0.00           C  
ATOM   4639  CG2 THR   624     114.098  75.527  75.909  0.00  0.00           C  
ATOM   4640  OG1 THR   624     113.351  74.481  77.851  0.00  0.00           O  
ATOM   4641  N   ASP   625     114.674  76.815  80.749  0.00  0.00           N  
ATOM   4642  CA  ASP   625     114.297  76.846  82.191  0.00  0.00           C  
ATOM   4643  C   ASP   625     113.857  78.328  82.515  0.00  0.00           C  
ATOM   4644  O   ASP   625     112.746  78.495  83.146  0.00  0.00           O  
ATOM   4645  CB  ASP   625     115.437  76.442  83.123  0.00  0.00           C  
ATOM   4646  CG  ASP   625     115.803  74.998  83.193  0.00  0.00           C  
ATOM   4647  OD1 ASP   625     115.030  74.103  82.770  0.00  0.00           O  
ATOM   4648  OD2 ASP   625     116.941  74.720  83.642  0.00  0.00           O1-
ATOM   4649  N   ASP   626     114.620  79.355  82.033  0.00  0.00           N  
ATOM   4650  CA  ASP   626     114.185  80.726  82.143  0.00  0.00           C  
ATOM   4651  C   ASP   626     113.026  81.127  81.214  0.00  0.00           C  
ATOM   4652  O   ASP   626     112.472  82.217  81.368  0.00  0.00           O  
ATOM   4653  CB  ASP   626     115.426  81.644  82.067  0.00  0.00           C  
ATOM   4654  CG  ASP   626     116.314  81.688  83.422  0.00  0.00           C  
ATOM   4655  OD1 ASP   626     115.754  81.849  84.527  0.00  0.00           O  
ATOM   4656  OD2 ASP   626     117.551  81.676  83.321  0.00  0.00           O1-
ATOM   4657  N   LYS   627     112.686  80.353  80.172  0.00  0.00           N  
ATOM   4658  CA  LYS   627     111.791  80.785  79.000  0.00  0.00           C  
ATOM   4659  C   LYS   627     110.287  80.564  79.262  0.00  0.00           C  
ATOM   4660  O   LYS   627     109.893  79.509  79.736  0.00  0.00           O  
ATOM   4661  CB  LYS   627     112.323  80.186  77.710  0.00  0.00           C  
ATOM   4662  CG  LYS   627     111.542  80.758  76.553  0.00  0.00           C  
ATOM   4663  CD  LYS   627     112.203  80.473  75.229  0.00  0.00           C  
ATOM   4664  CE  LYS   627     111.606  81.443  74.176  0.00  0.00           C  
ATOM   4665  NZ  LYS   627     112.397  81.501  72.937  0.00  0.00           N1+
ATOM   4666  N   ILE   628     109.504  81.617  79.112  0.00  0.00           N  
ATOM   4667  CA  ILE   628     108.030  81.650  79.140  0.00  0.00           C  
ATOM   4668  C   ILE   628     107.407  80.630  78.153  0.00  0.00           C  
ATOM   4669  O   ILE   628     107.748  80.646  76.977  0.00  0.00           O  
ATOM   4670  CB  ILE   628     107.385  83.052  78.828  0.00  0.00           C  
ATOM   4671  CG1 ILE   628     107.792  84.051  79.914  0.00  0.00           C  
ATOM   4672  CG2 ILE   628     105.871  83.100  78.571  0.00  0.00           C  
ATOM   4673  CD1 ILE   628     107.030  83.959  81.188  0.00  0.00           C  
ATOM   4674  N   ASN   629     106.410  79.886  78.582  0.00  0.00           N  
ATOM   4675  CA  ASN   629     105.494  79.091  77.712  0.00  0.00           C  
ATOM   4676  C   ASN   629     104.768  79.912  76.645  0.00  0.00           C  
ATOM   4677  O   ASN   629     104.108  80.924  76.952  0.00  0.00           O  
ATOM   4678  CB  ASN   629     104.562  78.252  78.590  0.00  0.00           C  
ATOM   4679  CG  ASN   629     103.551  77.393  77.814  0.00  0.00           C  
ATOM   4680  ND2 ASN   629     103.036  76.367  78.490  0.00  0.00           N  
ATOM   4681  OD1 ASN   629     103.101  77.674  76.702  0.00  0.00           O  
ATOM   4682  N   THR   630     104.820  79.615  75.348  0.00  0.00           N  
ATOM   4683  CA  THR   630     104.334  80.459  74.210  0.00  0.00           C  
ATOM   4684  C   THR   630     102.828  80.783  74.195  0.00  0.00           C  
ATOM   4685  O   THR   630     102.415  81.811  73.610  0.00  0.00           O  
ATOM   4686  CB  THR   630     104.878  79.875  72.859  0.00  0.00           C  
ATOM   4687  CG2 THR   630     105.050  80.901  71.790  0.00  0.00           C  
ATOM   4688  OG1 THR   630     106.170  79.419  73.132  0.00  0.00           O  
ATOM   4689  N   LYS   631     102.063  79.865  74.810  0.00  0.00           N  
ATOM   4690  CA  LYS   631     100.626  80.016  75.004  0.00  0.00           C  
ATOM   4691  C   LYS   631     100.260  81.038  76.067  0.00  0.00           C  
ATOM   4692  O   LYS   631      99.099  81.357  76.303  0.00  0.00           O  
ATOM   4693  CB  LYS   631     100.009  78.629  75.441  0.00  0.00           C  
ATOM   4694  CG  LYS   631     100.461  77.391  74.589  0.00  0.00           C  
ATOM   4695  CD  LYS   631     100.261  76.043  75.354  0.00  0.00           C  
ATOM   4696  CE  LYS   631     100.955  74.980  74.566  0.00  0.00           C  
ATOM   4697  NZ  LYS   631     100.835  73.598  75.146  0.00  0.00           N1+
ATOM   4698  N   HIE   632     101.301  81.598  76.746  0.00  0.00           N  
ATOM   4699  CA  HIE   632     101.192  82.489  77.867  0.00  0.00           C  
ATOM   4700  C   HIE   632     101.628  83.904  77.548  0.00  0.00           C  
ATOM   4701  O   HIE   632     101.827  84.579  78.547  0.00  0.00           O  
ATOM   4702  CB  HIE   632     101.835  81.864  79.157  0.00  0.00           C  
ATOM   4703  CG  HIE   632     101.209  80.615  79.516  0.00  0.00           C  
ATOM   4704  CD2 HIE   632     101.289  79.451  78.863  0.00  0.00           C  
ATOM   4705  ND1 HIE   632     100.362  80.490  80.546  0.00  0.00           N  
ATOM   4706  CE1 HIE   632      99.746  79.303  80.437  0.00  0.00           C  
ATOM   4707  NE2 HIE   632     100.242  78.665  79.357  0.00  0.00           N  
ATOM   4708  N   LEU   633     101.926  84.340  76.273  0.00  0.00           N  
ATOM   4709  CA  LEU   633     102.482  85.667  75.934  0.00  0.00           C  
ATOM   4710  C   LEU   633     101.411  86.600  75.416  0.00  0.00           C  
ATOM   4711  O   LEU   633     100.653  86.229  74.564  0.00  0.00           O  
ATOM   4712  CB  LEU   633     103.607  85.433  74.828  0.00  0.00           C  
ATOM   4713  CG  LEU   633     104.780  84.642  75.412  0.00  0.00           C  
ATOM   4714  CD1 LEU   633     105.674  84.213  74.250  0.00  0.00           C  
ATOM   4715  CD2 LEU   633     105.662  85.524  76.240  0.00  0.00           C  
ATOM   4716  N   PRO   634     101.428  87.883  75.875  0.00  0.00           N  
ATOM   4717  CA  PRO   634     100.642  88.940  75.316  0.00  0.00           C  
ATOM   4718  C   PRO   634     100.985  89.124  73.823  0.00  0.00           C  
ATOM   4719  O   PRO   634     102.134  89.093  73.477  0.00  0.00           O  
ATOM   4720  CB  PRO   634     101.015  90.229  76.083  0.00  0.00           C  
ATOM   4721  CG  PRO   634     101.343  89.636  77.467  0.00  0.00           C  
ATOM   4722  CD  PRO   634     101.923  88.330  77.140  0.00  0.00           C  
ATOM   4723  N   SER   635      99.988  89.281  72.958  0.00  0.00           N  
ATOM   4724  CA  SER   635     100.106  89.249  71.525  0.00  0.00           C  
ATOM   4725  C   SER   635     101.190  90.147  70.918  0.00  0.00           C  
ATOM   4726  O   SER   635     101.748  89.788  69.924  0.00  0.00           O  
ATOM   4727  CB  SER   635      98.728  89.528  70.925  0.00  0.00           C  
ATOM   4728  OG  SER   635      98.394  90.932  71.117  0.00  0.00           O  
ATOM   4729  N   THR   636     101.475  91.284  71.546  0.00  0.00           N  
ATOM   4730  CA  THR   636     102.577  92.209  71.231  0.00  0.00           C  
ATOM   4731  C   THR   636     103.960  91.939  71.859  0.00  0.00           C  
ATOM   4732  O   THR   636     105.033  92.186  71.214  0.00  0.00           O  
ATOM   4733  CB  THR   636     102.196  93.604  71.566  0.00  0.00           C  
ATOM   4734  CG2 THR   636     101.079  94.123  70.752  0.00  0.00           C  
ATOM   4735  OG1 THR   636     101.896  93.741  72.938  0.00  0.00           O  
ATOM   4736  N   CYS   637     104.107  91.240  72.976  0.00  0.00           N  
ATOM   4737  CA  CYS   637     105.261  90.873  73.745  0.00  0.00           C  
ATOM   4738  C   CYS   637     105.998  89.623  73.344  0.00  0.00           C  
ATOM   4739  O   CYS   637     106.237  88.728  74.128  0.00  0.00           O  
ATOM   4740  CB  CYS   637     104.847  90.850  75.250  0.00  0.00           C  
ATOM   4741  SG  CYS   637     104.236  92.497  75.821  0.00  0.00           S  
ATOM   4742  N   ARG   638     106.250  89.579  72.032  0.00  0.00           N  
ATOM   4743  CA  ARG   638     106.822  88.350  71.377  0.00  0.00           C  
ATOM   4744  C   ARG   638     107.993  88.500  70.385  0.00  0.00           C  
ATOM   4745  O   ARG   638     108.264  87.639  69.592  0.00  0.00           O  
ATOM   4746  CB  ARG   638     105.607  87.589  70.706  0.00  0.00           C  
ATOM   4747  CG  ARG   638     104.497  87.265  71.689  0.00  0.00           C  
ATOM   4748  CD  ARG   638     103.473  86.367  71.098  0.00  0.00           C  
ATOM   4749  NE  ARG   638     102.619  87.137  70.231  0.00  0.00           N  
ATOM   4750  CZ  ARG   638     101.623  86.635  69.513  0.00  0.00           C  
ATOM   4751  NH1 ARG   638     101.230  85.415  69.655  0.00  0.00           N1+
ATOM   4752  NH2 ARG   638     100.833  87.406  68.867  0.00  0.00           N  
ATOM   4753  N   ASP   639     108.663  89.630  70.583  0.00  0.00           N  
ATOM   4754  CA  ASP   639     109.823  90.004  69.797  0.00  0.00           C  
ATOM   4755  C   ASP   639     111.078  89.091  69.908  0.00  0.00           C  
ATOM   4756  O   ASP   639     111.283  88.497  70.972  0.00  0.00           O  
ATOM   4757  CB  ASP   639     110.261  91.479  70.064  0.00  0.00           C  
ATOM   4758  CG  ASP   639     109.270  92.515  69.506  0.00  0.00           C  
ATOM   4759  OD1 ASP   639     108.735  92.321  68.404  0.00  0.00           O  
ATOM   4760  OD2 ASP   639     108.908  93.460  70.174  0.00  0.00           O1-
ATOM   4761  N   ASP   640     111.829  88.947  68.825  0.00  0.00           N  
ATOM   4762  CA  ASP   640     113.043  88.086  68.861  0.00  0.00           C  
ATOM   4763  C   ASP   640     114.223  88.698  68.113  0.00  0.00           C  
ATOM   4764  O   ASP   640     114.176  89.838  67.556  0.00  0.00           O  
ATOM   4765  CB  ASP   640     112.754  86.627  68.480  0.00  0.00           C  
ATOM   4766  CG  ASP   640     112.306  86.452  67.039  0.00  0.00           C  
ATOM   4767  OD1 ASP   640     113.011  86.904  66.055  0.00  0.00           O  
ATOM   4768  OD2 ASP   640     111.274  85.797  66.877  0.00  0.00           O1-
ATOM   4769  N   SER   641     115.380  88.013  68.154  0.00  0.00           N  
ATOM   4770  CA  SER   641     116.625  88.508  67.588  0.00  0.00           C  
ATOM   4771  C   SER   641     116.626  88.729  66.028  0.00  0.00           C  
ATOM   4772  O   SER   641     117.690  89.305  65.598  0.00  0.00           O  
ATOM   4773  CB  SER   641     117.847  87.701  68.042  0.00  0.00           C  
ATOM   4774  OG  SER   641     117.552  86.287  67.964  0.00  0.00           O  
ATOM   4775  N   SER   642     115.521  88.447  65.270  0.00  0.00           N  
ATOM   4776  CA  SER   642     115.363  89.131  63.956  0.00  0.00           C  
ATOM   4777  C   SER   642     115.161  90.666  63.922  0.00  0.00           C  
ATOM   4778  O   SER   642     115.053  91.252  62.903  0.00  0.00           O  
ATOM   4779  CB  SER   642     114.246  88.368  63.154  0.00  0.00           C  
ATOM   4780  OG  SER   642     112.987  88.434  63.766  0.00  0.00           O  
ATOM   4781  N   ALA   643     115.113  91.326  65.087  0.00  0.00           N  
ATOM   4782  CA  ALA   643     114.456  92.586  65.254  0.00  0.00           C  
ATOM   4783  C   ALA   643     114.891  93.739  64.277  0.00  0.00           C  
ATOM   4784  O   ALA   643     116.080  94.068  64.183  0.00  0.00           O  
ATOM   4785  CB  ALA   643     114.781  93.049  66.660  0.00  0.00           C  
ATOM   4786  N   SER   644     113.921  94.417  63.642  0.00  0.00           N  
ATOM   4787  CA  SER   644     114.181  95.502  62.673  0.00  0.00           C  
ATOM   4788  C   SER   644     112.890  96.404  62.582  0.00  0.00           C  
ATOM   4789  O   SER   644     111.944  96.067  61.823  0.00  0.00           O  
ATOM   4790  CB  SER   644     114.611  94.887  61.333  0.00  0.00           C  
ATOM   4791  OG  SER   644     115.021  95.891  60.483  0.00  0.00           O  
ATOM   4792  OXT SER   644     112.899  97.441  63.246  0.00  0.00           O1-
ATOM   4793  N   PHE   645      52.385  47.663  92.623  0.00  0.00           N  
ATOM   4794  CA  PHE   645      53.809  48.127  92.867  0.00  0.00           C  
ATOM   4795  C   PHE   645      54.473  48.839  91.707  0.00  0.00           C  
ATOM   4796  O   PHE   645      55.337  49.660  91.970  0.00  0.00           O  
ATOM   4797  CB  PHE   645      54.777  47.008  93.458  0.00  0.00           C  
ATOM   4798  CG  PHE   645      54.776  46.877  94.981  0.00  0.00           C  
ATOM   4799  CD1 PHE   645      55.879  46.340  95.640  0.00  0.00           C  
ATOM   4800  CD2 PHE   645      53.686  47.426  95.725  0.00  0.00           C  
ATOM   4801  CE1 PHE   645      55.814  46.105  97.046  0.00  0.00           C  
ATOM   4802  CE2 PHE   645      53.597  47.218  97.089  0.00  0.00           C  
ATOM   4803  CZ  PHE   645      54.642  46.501  97.692  0.00  0.00           C  
ATOM   4804  N   THR   646      54.050  48.767  90.379  0.00  0.00           N  
ATOM   4805  CA  THR   646      54.523  49.554  89.255  0.00  0.00           C  
ATOM   4806  C   THR   646      54.620  51.042  89.478  0.00  0.00           C  
ATOM   4807  O   THR   646      55.470  51.718  88.882  0.00  0.00           O  
ATOM   4808  CB  THR   646      53.733  49.171  87.984  0.00  0.00           C  
ATOM   4809  CG2 THR   646      53.550  47.632  87.844  0.00  0.00           C  
ATOM   4810  OG1 THR   646      52.447  49.685  87.981  0.00  0.00           O  
ATOM   4811  N   LEU   647      53.691  51.577  90.345  0.00  0.00           N  
ATOM   4812  CA  LEU   647      53.755  53.022  90.565  0.00  0.00           C  
ATOM   4813  C   LEU   647      55.036  53.438  91.416  0.00  0.00           C  
ATOM   4814  O   LEU   647      55.390  54.608  91.347  0.00  0.00           O  
ATOM   4815  CB  LEU   647      52.483  53.555  91.239  0.00  0.00           C  
ATOM   4816  CG  LEU   647      51.149  53.166  90.532  0.00  0.00           C  
ATOM   4817  CD1 LEU   647      49.992  53.600  91.417  0.00  0.00           C  
ATOM   4818  CD2 LEU   647      51.018  53.754  89.093  0.00  0.00           C  
ATOM   4819  N   ILE   648      55.724  52.582  92.182  0.00  0.00           N  
ATOM   4820  CA  ILE   648      56.864  53.012  92.957  0.00  0.00           C  
ATOM   4821  C   ILE   648      57.951  53.755  92.171  0.00  0.00           C  
ATOM   4822  O   ILE   648      58.545  54.699  92.690  0.00  0.00           O  
ATOM   4823  CB  ILE   648      57.419  51.735  93.665  0.00  0.00           C  
ATOM   4824  CG1 ILE   648      56.384  51.334  94.738  0.00  0.00           C  
ATOM   4825  CG2 ILE   648      58.874  51.802  94.175  0.00  0.00           C  
ATOM   4826  CD1 ILE   648      56.588  49.923  95.304  0.00  0.00           C  
ATOM   4827  N   GLU   649      58.218  53.317  90.937  0.00  0.00           N  
ATOM   4828  CA  GLU   649      59.071  54.058  89.997  0.00  0.00           C  
ATOM   4829  C   GLU   649      58.618  55.493  89.705  0.00  0.00           C  
ATOM   4830  O   GLU   649      59.451  56.396  89.696  0.00  0.00           O  
ATOM   4831  CB  GLU   649      59.244  53.300  88.726  0.00  0.00           C  
ATOM   4832  CG  GLU   649      60.096  54.094  87.687  0.00  0.00           C  
ATOM   4833  CD  GLU   649      60.657  53.101  86.618  0.00  0.00           C  
ATOM   4834  OE1 GLU   649      60.891  51.864  86.863  0.00  0.00           O  
ATOM   4835  OE2 GLU   649      60.862  53.527  85.446  0.00  0.00           O1-
ATOM   4836  N   LEU   650      57.302  55.801  89.564  0.00  0.00           N  
ATOM   4837  CA  LEU   650      56.778  57.133  89.361  0.00  0.00           C  
ATOM   4838  C   LEU   650      56.868  57.959  90.676  0.00  0.00           C  
ATOM   4839  O   LEU   650      57.300  59.098  90.658  0.00  0.00           O  
ATOM   4840  CB  LEU   650      55.352  56.930  88.795  0.00  0.00           C  
ATOM   4841  CG  LEU   650      55.266  56.049  87.531  0.00  0.00           C  
ATOM   4842  CD1 LEU   650      53.741  56.004  87.131  0.00  0.00           C  
ATOM   4843  CD2 LEU   650      56.167  56.429  86.354  0.00  0.00           C  
ATOM   4844  N   MET   651      56.612  57.367  91.839  0.00  0.00           N  
ATOM   4845  CA  MET   651      57.011  57.957  93.129  0.00  0.00           C  
ATOM   4846  C   MET   651      58.475  58.300  93.368  0.00  0.00           C  
ATOM   4847  O   MET   651      58.776  59.278  93.995  0.00  0.00           O  
ATOM   4848  CB  MET   651      56.396  57.222  94.336  0.00  0.00           C  
ATOM   4849  CG  MET   651      54.842  57.252  94.373  0.00  0.00           C  
ATOM   4850  SD  MET   651      53.955  56.480  95.746  0.00  0.00           S  
ATOM   4851  CE  MET   651      54.663  54.797  95.459  0.00  0.00           C  
ATOM   4852  N   ILE   652      59.396  57.519  92.729  0.00  0.00           N  
ATOM   4853  CA  ILE   652      60.826  57.880  92.657  0.00  0.00           C  
ATOM   4854  C   ILE   652      61.231  59.045  91.793  0.00  0.00           C  
ATOM   4855  O   ILE   652      61.884  59.981  92.212  0.00  0.00           O  
ATOM   4856  CB  ILE   652      61.700  56.677  92.286  0.00  0.00           C  
ATOM   4857  CG1 ILE   652      61.793  55.658  93.452  0.00  0.00           C  
ATOM   4858  CG2 ILE   652      63.174  57.089  91.951  0.00  0.00           C  
ATOM   4859  CD1 ILE   652      62.062  54.225  92.953  0.00  0.00           C  
ATOM   4860  N   VAL   653      60.660  59.036  90.597  0.00  0.00           N  
ATOM   4861  CA  VAL   653      60.689  60.138  89.647  0.00  0.00           C  
ATOM   4862  C   VAL   653      60.116  61.482  90.144  0.00  0.00           C  
ATOM   4863  O   VAL   653      60.872  62.432  90.213  0.00  0.00           O  
ATOM   4864  CB  VAL   653      59.852  59.766  88.306  0.00  0.00           C  
ATOM   4865  CG1 VAL   653      59.664  60.948  87.332  0.00  0.00           C  
ATOM   4866  CG2 VAL   653      60.590  58.691  87.595  0.00  0.00           C  
ATOM   4867  N   ILE   654      58.836  61.547  90.618  0.00  0.00           N  
ATOM   4868  CA  ILE   654      58.298  62.818  91.153  0.00  0.00           C  
ATOM   4869  C   ILE   654      59.029  63.229  92.526  0.00  0.00           C  
ATOM   4870  O   ILE   654      59.019  64.433  92.775  0.00  0.00           O  
ATOM   4871  CB  ILE   654      56.804  62.734  91.278  0.00  0.00           C  
ATOM   4872  CG1 ILE   654      56.369  61.819  92.468  0.00  0.00           C  
ATOM   4873  CG2 ILE   654      56.125  62.330  89.941  0.00  0.00           C  
ATOM   4874  CD1 ILE   654      54.878  61.542  92.612  0.00  0.00           C  
ATOM   4875  N   ALA   655      59.603  62.306  93.321  0.00  0.00           N  
ATOM   4876  CA  ALA   655      60.470  62.586  94.434  0.00  0.00           C  
ATOM   4877  C   ALA   655      61.774  63.182  93.966  0.00  0.00           C  
ATOM   4878  O   ALA   655      62.333  64.098  94.526  0.00  0.00           O  
ATOM   4879  CB  ALA   655      60.633  61.279  95.327  0.00  0.00           C  
ATOM   4880  N   ILE   656      62.384  62.668  92.840  0.00  0.00           N  
ATOM   4881  CA  ILE   656      63.654  63.253  92.228  0.00  0.00           C  
ATOM   4882  C   ILE   656      63.363  64.662  91.661  0.00  0.00           C  
ATOM   4883  O   ILE   656      64.203  65.590  91.721  0.00  0.00           O  
ATOM   4884  CB  ILE   656      64.312  62.246  91.163  0.00  0.00           C  
ATOM   4885  CG1 ILE   656      64.973  61.049  91.897  0.00  0.00           C  
ATOM   4886  CG2 ILE   656      65.276  63.026  90.360  0.00  0.00           C  
ATOM   4887  CD1 ILE   656      65.028  59.851  90.930  0.00  0.00           C  
ATOM   4888  N   VAL   657      62.125  64.838  91.152  0.00  0.00           N  
ATOM   4889  CA  VAL   657      61.792  66.216  90.806  0.00  0.00           C  
ATOM   4890  C   VAL   657      61.652  67.058  92.139  0.00  0.00           C  
ATOM   4891  O   VAL   657      62.077  68.187  92.188  0.00  0.00           O  
ATOM   4892  CB  VAL   657      60.424  66.308  90.107  0.00  0.00           C  
ATOM   4893  CG1 VAL   657      60.018  67.733  89.977  0.00  0.00           C  
ATOM   4894  CG2 VAL   657      60.606  65.675  88.698  0.00  0.00           C  
ATOM   4895  N   GLY   658      61.147  66.483  93.215  0.00  0.00           N  
ATOM   4896  CA  GLY   658      61.156  67.081  94.608  0.00  0.00           C  
ATOM   4897  C   GLY   658      62.529  67.397  95.240  0.00  0.00           C  
ATOM   4898  O   GLY   658      62.617  67.683  96.415  0.00  0.00           O  
ATOM   4899  N   ILE   659      63.567  67.260  94.379  0.00  0.00           N  
ATOM   4900  CA  ILE   659      64.888  67.768  94.734  0.00  0.00           C  
ATOM   4901  C   ILE   659      65.595  68.470  93.543  0.00  0.00           C  
ATOM   4902  O   ILE   659      65.850  69.667  93.620  0.00  0.00           O  
ATOM   4903  CB  ILE   659      65.802  66.715  95.253  0.00  0.00           C  
ATOM   4904  CG1 ILE   659      66.266  65.683  94.262  0.00  0.00           C  
ATOM   4905  CG2 ILE   659      65.314  66.182  96.666  0.00  0.00           C  
ATOM   4906  CD1 ILE   659      66.880  64.386  94.808  0.00  0.00           C  
ATOM   4907  N   LEU   660      65.646  67.924  92.324  0.00  0.00           N  
ATOM   4908  CA  LEU   660      66.129  68.626  91.046  0.00  0.00           C  
ATOM   4909  C   LEU   660      65.437  69.908  90.788  0.00  0.00           C  
ATOM   4910  O   LEU   660      66.009  70.839  90.217  0.00  0.00           O  
ATOM   4911  CB  LEU   660      66.100  67.630  89.813  0.00  0.00           C  
ATOM   4912  CG  LEU   660      67.080  66.489  89.880  0.00  0.00           C  
ATOM   4913  CD1 LEU   660      67.118  65.727  88.502  0.00  0.00           C  
ATOM   4914  CD2 LEU   660      68.515  66.881  90.187  0.00  0.00           C  
ATOM   4915  N   ALA   661      64.088  70.004  91.100  0.00  0.00           N  
ATOM   4916  CA  ALA   661      63.404  71.257  90.979  0.00  0.00           C  
ATOM   4917  C   ALA   661      63.098  71.995  92.381  0.00  0.00           C  
ATOM   4918  O   ALA   661      62.417  73.009  92.341  0.00  0.00           O  
ATOM   4919  CB  ALA   661      62.187  71.005  90.152  0.00  0.00           C  
ATOM   4920  N   ALA   662      63.675  71.507  93.470  0.00  0.00           N  
ATOM   4921  CA  ALA   662      63.450  72.112  94.786  0.00  0.00           C  
ATOM   4922  C   ALA   662      64.754  71.969  95.692  0.00  0.00           C  
ATOM   4923  O   ALA   662      65.090  70.887  96.243  0.00  0.00           O  
ATOM   4924  CB  ALA   662      62.270  71.559  95.441  0.00  0.00           C  
ATOM   4925  N   VAL   663      65.513  73.051  95.797  0.00  0.00           N  
ATOM   4926  CA  VAL   663      66.752  73.268  96.630  0.00  0.00           C  
ATOM   4927  C   VAL   663      68.035  72.706  96.090  0.00  0.00           C  
ATOM   4928  O   VAL   663      69.114  72.680  96.752  0.00  0.00           O  
ATOM   4929  CB  VAL   663      66.633  73.534  98.152  0.00  0.00           C  
ATOM   4930  CG1 VAL   663      67.490  74.617  98.719  0.00  0.00           C  
ATOM   4931  CG2 VAL   663      65.201  73.546  98.637  0.00  0.00           C  
ATOM   4932  N   ALA   664      68.014  72.152  94.862  0.00  0.00           N  
ATOM   4933  CA  ALA   664      69.237  71.738  94.087  0.00  0.00           C  
ATOM   4934  C   ALA   664      70.015  72.941  93.508  0.00  0.00           C  
ATOM   4935  O   ALA   664      69.954  73.301  92.336  0.00  0.00           O  
ATOM   4936  CB  ALA   664      68.814  70.662  93.081  0.00  0.00           C  
ATOM   4937  N   LEU   665      70.723  73.637  94.427  0.00  0.00           N  
ATOM   4938  CA  LEU   665      71.339  74.980  94.318  0.00  0.00           C
[truncated: 376,331 more chars]
